# Supplementary material for: Mapping the pericentric heterochromatin by comparative genomic hybridization analysis and chromosome deletions in Drosophila melanogaster
Source: HighWire-hosted journal article supplement (doi:10.1101/gr.137406.112), 2012-06-28
Supplement: Supplemental_Table_3-List_of_mapped_H-probes.xlsx [file Supplemental_Table_3-List_of_mapped_H-probes.xlsx]

## Sheet: Sheet1
Probe ID	Class	Map (Global)	Map (Regional)	Sequence Category	Satellite or TE family
nw>contig11608|size1905|read1043|cov20.66_1120133	armHet	2CEN	2CEN	non-TE non-Satellite
nw>contig12480|size245|read257|cov38.51_81202	armHet	2CEN	2CEN	non-TE non-Satellite
nw>contig14458|size140|read126|cov32.78_56350	armHet	2CEN	2CEN	non-TE non-Satellite
nw>contig16962|size154|read89|cov22.00_0504	armHet	2CEN	2CEN	non-TE non-Satellite
nw>contig26224|size264|read146|cov20.80_65865	armHet	2CEN	2CEN	non-TE non-Satellite
nw>contig5941|size132|read97|cov26.36_41321	armHet	2CEN	2CEN	non-TE non-Satellite
nw>contig6199|size76|read16|cov8.79_29717	armHet	2CEN	2CEN	non-TE non-Satellite
nw>contig6394|size101|read83|cov29.78_21359	armHet	2CEN	2CEN	non-TE non-Satellite
nw>contig8662|size94|read58|cov21.06_11581	armHet	2CEN	2CEN	non-TE non-Satellite
nw>contig11376|size117|read97|cov30.86_2120	armHet	2CEN	2CEN	TE	S
nw>contig12697|size117|read70|cov21.99_56224	armHet	2CEN	2CEN	TE	Porto1
nw>contig4798|size141|read335|cov88.17_571207	armHet	2CEN	2CEN	TE	gypsy5
nw>contig50840|size109|read78|cov25.96_301234	armHet	2CEN	2CEN	TE	297
nw>contig51140|size83|read47|cov21.67_171239	armHet	2CEN	2CEN	TE	Burdock
nw>contig8319|size120|read130|cov37.48_251555	armHet	2CEN	2CEN	TE	gypsy5
nw>contig8811|size87|read79|cov31.16_261592	armHet	2CEN	2CEN	TE	gypsy5
nw>contig9200|size104|read118|cov41.70_421627	armHet	2CEN	2CEN	TE	I
nw>contig9581|size116|read63|cov20.59_51655	armHet	2CEN	2CEN	TE	1360
nw>contig10151|size529|read320|cov22.56_39114	armHet	2CEN	2R2	non-TE non-Satellite
nw>contig10480|size737|read464|cov23.58_52137	armHet	2CEN	2R2	non-TE non-Satellite
nw>contig10775|size512|read359|cov26.06_19160	armHet	2CEN	2R2	non-TE non-Satellite
nw>contig10862|size1072|read659|cov22.71_73967	armHet	2CEN	2R2	non-TE non-Satellite
nw>contig10870|size286|read293|cov39.03_14369	armHet	2CEN	2R2	non-TE non-Satellite
nw>contig11076|size1535|read914|cov22.63_30887	armHet	2CEN	2R2	non-TE non-Satellite
nw>contig11120|size416|read240|cov21.38_7596	armHet	2CEN	2R2	non-TE non-Satellite
nw>contig11360|size132|read155|cov43.30_37115	armHet	2CEN	2R2	non-TE non-Satellite
nw>contig11483|size189|read176|cov33.35_28125	armHet	2CEN	2R2	non-TE non-Satellite
nw>contig11729|size394|read410|cov39.14_257149	armHet	2CEN	2R2	non-TE non-Satellite
nw>contig12071|size113|read105|cov36.20_17172	armHet	2CEN	2R2	non-TE non-Satellite
nw>contig12652|size1321|read805|cov22.77_284219	armHet	2CEN	2R2	non-TE non-Satellite
nw>contig12679|size237|read139|cov22.45_125223	armHet	2CEN	2R2	non-TE non-Satellite
nw>contig12791|size1896|read1089|cov21.42_1653231	armHet	2CEN	2R2	non-TE non-Satellite
nw>contig13092|size153|read154|cov37.86_23255	armHet	2CEN	2R2	non-TE non-Satellite
nw>contig13533|size154|read127|cov30.29_39294	armHet	2CEN	2R2	non-TE non-Satellite
nw>contig13908|size1022|read1118|cov41.12_468315	armHet	2CEN	2R2	non-TE non-Satellite
nw>contig13944|size777|read461|cov21.86_603317	armHet	2CEN	2R2	non-TE non-Satellite
nw>contig14546|size196|read126|cov23.24_133358	armHet	2CEN	2R2	non-TE non-Satellite
nw>contig14573|size263|read231|cov32.27_39359	armHet	2CEN	2R2	non-TE non-Satellite
nw>contig14798|size1211|read685|cov21.69_464371	armHet	2CEN	2R2	non-TE non-Satellite
nw>contig15056|size131|read74|cov20.68_41389	armHet	2CEN	2R2	non-TE non-Satellite
nw>contig15624|size124|read78|cov23.13_26420	armHet	2CEN	2R2	non-TE non-Satellite
nw>contig15640|size1720|read1001|cov21.85_215421	armHet	2CEN	2R2	non-TE non-Satellite
nw>contig15853|size72|read38|cov20.31_0442	armHet	2CEN	2R2	non-TE non-Satellite
nw>contig17133|size142|read153|cov38.78_18515	armHet	2CEN	2R2	non-TE non-Satellite
nw>contig17265|size570|read334|cov21.82_306522	armHet	2CEN	2R2	non-TE non-Satellite
nw>contig17319|size545|read309|cov21.59_90523	armHet	2CEN	2R2	non-TE non-Satellite
nw>contig17323|size172|read136|cov29.80_59524	armHet	2CEN	2R2	non-TE non-Satellite
nw>contig17630|size381|read221|cov21.42_305539	armHet	2CEN	2R2	non-TE non-Satellite
nw>contig18141|size191|read45|cov11.15_383140	armHet	2CEN	2R2	non-TE non-Satellite
nw>contig18396|size445|read375|cov31.70_122579	armHet	2CEN	2R2	non-TE non-Satellite
nw>contig18629|size99|read56|cov20.31_8601	armHet	2CEN	2R2	non-TE non-Satellite
nw>contig18803|size269|read151|cov21.51_117613	armHet	2CEN	2R2	non-TE non-Satellite
nw>contig19483|size114|read97|cov30.75_6636	armHet	2CEN	2R2	non-TE non-Satellite
nw>contig19731|size487|read351|cov26.29_269647	armHet	2CEN	2R2	non-TE non-Satellite
nw>contig20129|size1171|read694|cov22.29_864660	armHet	2CEN	2R2	non-TE non-Satellite
nw>contig20216|size326|read193|cov21.59_76662	armHet	2CEN	2R2	non-TE non-Satellite
nw>contig20263|size131|read89|cov23.92_17664	armHet	2CEN	2R2	non-TE non-Satellite
nw>contig20276|size119|read78|cov24.69_33666	armHet	2CEN	2R2	non-TE non-Satellite
nw>contig20328|size145|read101|cov25.73_80670	armHet	2CEN	2R2	non-TE non-Satellite
nw>contig20447|size133|read91|cov24.84_53676	armHet	2CEN	2R2	non-TE non-Satellite
nw>contig20885|size98|read113|cov43.03_36690	armHet	2CEN	2R2	non-TE non-Satellite
nw>contig21064|size132|read72|cov20.38_32700	armHet	2CEN	2R2	non-TE non-Satellite
nw>contig21409|size84|read52|cov24.36_3720	armHet	2CEN	2R2	non-TE non-Satellite
nw>contig21444|size81|read52|cov23.51_2726	armHet	2CEN	2R2	non-TE non-Satellite
nw>contig21701|size317|read180|cov21.46_207733	armHet	2CEN	2R2	non-TE non-Satellite
nw>contig21732|size92|read65|cov26.05_27735	armHet	2CEN	2R2	non-TE non-Satellite
nw>contig21932|size281|read148|cov20.66_72743	armHet	2CEN	2R2	non-TE non-Satellite
nw>contig21976|size145|read95|cov24.65_22744	armHet	2CEN	2R2	non-TE non-Satellite
nw>contig22026|size594|read322|cov20.59_50746	armHet	2CEN	2R2	non-TE non-Satellite
nw>contig22290|size119|read79|cov24.62_59756	armHet	2CEN	2R2	non-TE non-Satellite
nw>contig23040|size277|read148|cov20.10_162770	armHet	2CEN	2R2	non-TE non-Satellite
nw>contig24084|size93|read61|cov24.74_0801	armHet	2CEN	2R2	non-TE non-Satellite
nw>contig24115|size277|read166|cov21.82_107804	armHet	2CEN	2R2	non-TE non-Satellite
nw>contig24284|size159|read91|cov21.13_16811	armHet	2CEN	2R2	non-TE non-Satellite
nw>contig24962|size236|read170|cov26.95_163830	armHet	2CEN	2R2	non-TE non-Satellite
nw>contig25690|size94|read73|cov29.31_34851	armHet	2CEN	2R2	non-TE non-Satellite
nw>contig26232|size222|read217|cov36.80_53866	armHet	2CEN	2R2	non-TE non-Satellite
nw>contig26324|size324|read192|cov22.04_94868	armHet	2CEN	2R2	non-TE non-Satellite
nw>contig26516|size175|read94|cov20.27_32876	armHet	2CEN	2R2	non-TE non-Satellite
nw>contig28678|size424|read239|cov21.21_340932	armHet	2CEN	2R2	non-TE non-Satellite
nw>contig29189|size146|read82|cov20.79_83937	armHet	2CEN	2R2	non-TE non-Satellite
nw>contig29537|size274|read151|cov20.64_122942	armHet	2CEN	2R2	non-TE non-Satellite
nw>contig30149|size338|read205|cov22.55_151960	armHet	2CEN	2R2	non-TE non-Satellite
nw>contig30261|size136|read77|cov21.32_59964	armHet	2CEN	2R2	non-TE non-Satellite
nw>contig30623|size269|read148|cov20.11_25975	armHet	2CEN	2R2	non-TE non-Satellite
nw>contig33137|size300|read172|cov21.63_1411013	armHet	2CEN	2R2	non-TE non-Satellite
nw>contig33928|size297|read158|cov20.16_2131029	armHet	2CEN	2R2	non-TE non-Satellite
nw>contig36141|size201|read131|cov23.82_211062	armHet	2CEN	2R2	non-TE non-Satellite
nw>contig36477|size579|read323|cov20.82_3701069	armHet	2CEN	2R2	non-TE non-Satellite
nw>contig40106|size158|read89|cov20.80_291118	armHet	2CEN	2R2	non-TE non-Satellite
nw>contig41883|size732|read420|cov21.08_2421142	armHet	2CEN	2R2	non-TE non-Satellite
nw>contig42742|size149|read90|cov22.29_271151	armHet	2CEN	2R2	non-TE non-Satellite
nw>contig43351|size302|read171|cov21.33_1231160	armHet	2CEN	2R2	non-TE non-Satellite
nw>contig44080|size173|read109|cov23.71_981175	armHet	2CEN	2R2	non-TE non-Satellite
nw>contig4483|size235|read220|cov34.03_651184	armHet	2CEN	2R2	non-TE non-Satellite
nw>contig4621|size91|read105|cov41.36_71188	armHet	2CEN	2R2	non-TE non-Satellite
nw>contig4719|size203|read172|cov31.74_441196	armHet	2CEN	2R2	non-TE non-Satellite
nw>contig5024|size204|read275|cov50.76_21224	armHet	2CEN	2R2	non-TE non-Satellite
nw>contig52544|size216|read115|cov21.14_361251	armHet	2CEN	2R2	non-TE non-Satellite
nw>contig52812|size105|read72|cov23.70_181255	armHet	2CEN	2R2	non-TE non-Satellite
nw>contig5451|size347|read388|cov41.03_111272	armHet	2CEN	2R2	non-TE non-Satellite
nw>contig55241|size127|read70|cov21.13_311278	armHet	2CEN	2R2	non-TE non-Satellite
nw>contig58291|size297|read172|cov20.98_811307	armHet	2CEN	2R2	non-TE non-Satellite
nw>contig6333|size235|read204|cov31.86_731356	armHet	2CEN	2R2	non-TE non-Satellite
nw>contig6470|size131|read99|cov28.37_571367	armHet	2CEN	2R2	non-TE non-Satellite
nw>contig7006|size246|read149|cov21.63_251419	armHet	2CEN	2R2	non-TE non-Satellite
nw>contig7165|size477|read305|cov23.08_2641432	armHet	2CEN	2R2	non-TE non-Satellite
nw>contig7249|size1189|read773|cov24.62_6601441	armHet	2CEN	2R2	non-TE non-Satellite
nw>contig7359|size270|read179|cov24.60_1201450	armHet	2CEN	2R2	non-TE non-Satellite
nw>contig7674|size96|read104|cov40.36_261486	armHet	2CEN	2R2	non-TE non-Satellite
nw>contig8023|size2212|read1301|cov22.10_11011520	armHet	2CEN	2R2	non-TE non-Satellite
nw>contig8188|size170|read143|cov31.26_401544	armHet	2CEN	2R2	non-TE non-Satellite
nw>contig8291|size2052|read1269|cov23.35_4681551	armHet	2CEN	2R2	non-TE non-Satellite
nw>contig9116|size378|read221|cov21.88_1211619	armHet	2CEN	2R2	non-TE non-Satellite
nw>contig9199|size171|read161|cov34.08_651626	armHet	2CEN	2R2	non-TE non-Satellite
nw>contig9694|size1161|read652|cov20.87_3891666	armHet	2CEN	2R2	non-TE non-Satellite
nw>contig9718|size669|read410|cov22.43_1371668	armHet	2CEN	2R2	non-TE non-Satellite
nw>contig9783|size340|read447|cov48.25_2231677	armHet	2CEN	2R2	non-TE non-Satellite
nw>contig9824|size190|read191|cov38.56_1231682	armHet	2CEN	2R2	non-TE non-Satellite
nw>contig16309|size85|read54|cov22.88_24466	armHet	2CEN	2R2	TE	Cr1a
nw>contig19625|size316|read166|cov20.00_172642	armHet	2CEN	2R2	TE	INE-1
nw>contig20247|size218|read120|cov20.46_80663	armHet	2CEN	2R2	TE	Quasimodo
nw>contig20948|size629|read377|cov22.94_538694	armHet	2CEN	2R2	TE	Cr1a
nw>contig27455|size131|read94|cov26.53_43902	armHet	2CEN	2R2	TE	gypsy5
nw>contig46835|size95|read56|cov21.91_271195	armHet	2CEN	2R2	TE	gypsy5
nw>contig8512|size153|read270|cov66.40_91571	armHet	2CEN	2R2	TE	Cr1a
nw>contig8756|size159|read96|cov22.36_841589	armHet	2CEN	2R2	TE	copia
nw>contig9775|size160|read132|cov30.85_981675	armHet	2CEN	2R2	TE	Doc4
nw>contig16893|size189|read102|cov21.22_1499	armHet	2CEN	2R4	TE	NOF
nw>contig18475|size140|read109|cov29.76_39587	armHet	2CEN	2R4	TE	baggins
nw>contig19841|size228|read219|cov36.25_56652	armHet	2CEN	2R4	TE	springer
nw>contig4284|size212|read175|cov30.89_1201153	armHet	2CEN	2R4	TE	HB
nw>contig13065|size169|read97|cov21.88_99253	armHet	2CEN	2R5	TE	I
nw>contig7539|size142|read117|cov31.20_661468	armHet	2CEN	2R5	TE	gypsy5
nw>contig10259|size227|read166|cov28.00_7922	armHet	2CEN	2R6	non-TE non-Satellite
nw>contig13018|size116|read71|cov23.22_47248	armHet	2CEN	2Rn	non-TE non-Satellite
nw>contig15068|size335|read194|cov22.19_139390	armHet	2CEN	2Rn	non-TE non-Satellite
nw>contig15291|size193|read156|cov29.79_44402	armHet	2CEN	2Rn	non-TE non-Satellite
nw>contig18880|size134|read100|cov28.69_12616	armHet	2CEN	2Rn	non-TE non-Satellite
nw>contig19798|size204|read118|cov21.44_35651	armHet	2CEN	2Rn	non-TE non-Satellite
nw>contig19876|size700|read383|cov20.07_518654	armHet	2CEN	2Rn	non-TE non-Satellite
nw>contig22128|size378|read207|cov20.13_142749	armHet	2CEN	2Rn	non-TE non-Satellite
nw>contig23614|size125|read72|cov20.34_1785	armHet	2CEN	2Rn	non-TE non-Satellite
nw>contig28959|size187|read98|cov20.00_80935	armHet	2CEN	2Rn	non-TE non-Satellite
nw>contig36551|size121|read100|cov32.10_191071	armHet	2CEN	2Rn	non-TE non-Satellite
nw>contig57234|size97|read63|cov24.52_141297	armHet	2CEN	2Rn	non-TE non-Satellite
nw>contig6200|size215|read205|cov35.07_891349	armHet	2CEN	2Rn	non-TE non-Satellite
nw>contig7027|size506|read505|cov36.81_2301420	armHet	2CEN	2Rn	non-TE non-Satellite
nw>contig9583|size930|read634|cov24.46_4911656	armHet	2CEN	2Rn	non-TE non-Satellite
nw>contig10482|size75|read44|cov21.09_538	armHet	2CEN	2Rn	TE	diver2
nw>contig11654|size102|read105|cov39.78_28140	armHet	2CEN	2Rn	TE	rooA
nw>contig13390|size280|read165|cov21.47_78283	armHet	2CEN	2Rn	TE	1360
nw>contig13970|size231|read144|cov22.73_163318	armHet	2CEN	2Rn	TE	HB
nw>contig29798|size78|read53|cov24.68_2946	armHet	2CEN	2Rn	TE	gypsy5
nw>contig30536|size160|read95|cov22.64_91972	armHet	2CEN	2Rn	TE	17.6
nw>contig3576|size166|read289|cov64.20_351054	armHet	2CEN	2Rn	TE	INE-1
nw>contig3861|size90|read93|cov37.23_51094	armHet	2CEN	2Rn	TE	Circe
nw>contig4086|size145|read382|cov103.57_651130	armHet	2CEN	2Rn	TE	ninja-Dsim-like
nw>contig7148|size119|read81|cov25.58_461430	armHet	2CEN	2Rn	TE	Porto1
nw>contig7304|size175|read175|cov36.25_761444	armHet	2CEN	2Rn	TE	gypsy5
nw>contig74599|size79|read45|cov21.86_101457	armHet	2CEN	2Rn	TE	I
nw>contig8049|size99|read82|cov30.16_121524	armHet	2CEN	2Rn	TE	Cr1a
nw>contig8525|size142|read101|cov26.54_431573	armHet	2CEN	2Rn	TE	NOF
nw>contig8671|size125|read90|cov26.40_601583	armHet	2CEN	2Rn	TE	1360
R2919|size59	armHet	2L	2L	non-TE non-Satellite
R2919|size60	armHet	2L	2L	non-TE non-Satellite
R3809|size70	armHet	2L	2L	non-TE non-Satellite
R6290|size94	armHet	2L	2L	non-TE non-Satellite
R6290|size95	armHet	2L	2L	non-TE non-Satellite
ru>contig2919|size291|read283|cov35.65_7960	armHet	2L	2L	non-TE non-Satellite
ru>contig2919|size291|read283|cov35.65_8859	armHet	2L	2L	non-TE non-Satellite
ru>contig3809|size117|read68|cov21.05_5470	armHet	2L	2L	non-TE non-Satellite
ru>contig6290|size322|read199|cov23.17_1094	armHet	2L	2L	non-TE non-Satellite
ru>contig6290|size322|read199|cov23.17_395	armHet	2L	2L	non-TE non-Satellite
nw>contig15987|size261|read205|cov28.54_132450	armHet	2R	2CEN	non-TE non-Satellite
nw>contig11148|size203|read116|cov21.15_7899	armHet	2R	2CEN	TE	297
nw>contig5351|size133|read102|cov27.86_581264	armHet	2R	2CEN	TE	gypsy5
nw>contig12783|size96|read55|cov20.50_4230	armHet	2R	2R2	non-TE non-Satellite
nw>contig21290|size105|read66|cov22.47_33713	armHet	2R	2R2	non-TE non-Satellite
nw>contig21418|size305|read195|cov23.00_205722	armHet	2R	2R2	non-TE non-Satellite
nw>contig38529|size119|read63|cov20.55_151090	armHet	2R	2R2	non-TE non-Satellite
nw>contig43508|size287|read160|cov20.15_1641164	armHet	2R	2R2	non-TE non-Satellite
nw>contig8085|size2044|read1258|cov22.93_1351529	armHet	2R	2R2	non-TE non-Satellite
nw>contig6179|size160|read169|cov40.19_861344	armHet	2R	2R4	non-TE non-Satellite
nw>contig15765|size155|read90|cov21.52_73436	armHet	2R	2R4	TE	Cr1a
nw>contig8438|size157|read159|cov39.06_751564	armHet	2R	2R4	TE	invader6
nw>contig10024|size850|read899|cov39.88_3084	armHet	2R	2R5	non-TE non-Satellite
nw>contig10089|size656|read426|cov23.82_2499	armHet	2R	2R5	non-TE non-Satellite
nw>contig10203|size323|read184|cov20.54_19316	armHet	2R	2R5	non-TE non-Satellite
nw>contig10206|size501|read538|cov40.89_517	armHet	2R	2R5	non-TE non-Satellite
nw>contig10393|size141|read114|cov30.06_7229	armHet	2R	2R5	non-TE non-Satellite
nw>contig10429|size663|read398|cov22.24_15334	armHet	2R	2R5	non-TE non-Satellite
nw>contig10490|size567|read314|cov21.08_19539	armHet	2R	2R5	non-TE non-Satellite
nw>contig10605|size247|read137|cov20.87_2850	armHet	2R	2R5	non-TE non-Satellite
nw>contig10623|size440|read285|cov24.26_21251	armHet	2R	2R5	non-TE non-Satellite
nw>contig10637|size138|read108|cov27.70_1152	armHet	2R	2R5	non-TE non-Satellite
nw>contig10640|size231|read172|cov27.16_8753	armHet	2R	2R5	non-TE non-Satellite
nw>contig10758|size1029|read664|cov24.11_21358	armHet	2R	2R5	non-TE non-Satellite
nw>contig10998|size383|read231|cov21.99_28376	armHet	2R	2R5	non-TE non-Satellite
nw>contig11101|size114|read94|cov30.31_2788	armHet	2R	2R5	non-TE non-Satellite
nw>contig11104|size705|read380|cov20.25_27589	armHet	2R	2R5	non-TE non-Satellite
nw>contig11118|size119|read67|cov20.10_5895	armHet	2R	2R5	non-TE non-Satellite
nw>contig11180|size588|read381|cov23.96_185102	armHet	2R	2R5	non-TE non-Satellite
nw>contig11235|size220|read180|cov30.18_64105	armHet	2R	2R5	non-TE non-Satellite
nw>contig11266|size203|read130|cov23.58_80106	armHet	2R	2R5	non-TE non-Satellite
nw>contig11333|size284|read249|cov32.62_13112	armHet	2R	2R5	non-TE non-Satellite
nw>contig11354|size1147|read801|cov26.05_754113	armHet	2R	2R5	non-TE non-Satellite
nw>contig11493|size1426|read848|cov22.56_550126	armHet	2R	2R5	non-TE non-Satellite
nw>contig11612|size272|read183|cov23.66_88134	armHet	2R	2R5	non-TE non-Satellite
nw>contig11639|size87|read60|cov24.36_0137	armHet	2R	2R5	non-TE non-Satellite
nw>contig11695|size168|read98|cov22.08_78144	armHet	2R	2R5	non-TE non-Satellite
nw>contig11739|size742|read444|cov22.92_263150	armHet	2R	2R5	non-TE non-Satellite
nw>contig11901|size310|read198|cov23.83_24159	armHet	2R	2R5	non-TE non-Satellite
nw>contig11919|size394|read210|cov20.20_96162	armHet	2R	2R5	non-TE non-Satellite
nw>contig11946|size147|read115|cov30.07_22163	armHet	2R	2R5	non-TE non-Satellite
nw>contig12037|size709|read388|cov20.59_51170	armHet	2R	2R5	non-TE non-Satellite
nw>contig12181|size588|read336|cov21.56_119185	armHet	2R	2R5	non-TE non-Satellite
nw>contig12202|size878|read524|cov22.29_14187	armHet	2R	2R5	non-TE non-Satellite
nw>contig12263|size276|read231|cov31.26_89189	armHet	2R	2R5	non-TE non-Satellite
nw>contig12274|size2720|read1496|cov20.94_1199190	armHet	2R	2R5	non-TE non-Satellite
nw>contig12447|size155|read139|cov32.88_81197	armHet	2R	2R5	non-TE non-Satellite
nw>contig12448|size285|read227|cov29.39_176198	armHet	2R	2R5	non-TE non-Satellite
nw>contig12490|size157|read143|cov35.81_29203	armHet	2R	2R5	non-TE non-Satellite
nw>contig12491|size136|read139|cov37.49_7204	armHet	2R	2R5	non-TE non-Satellite
nw>contig12712|size145|read124|cov31.48_7225	armHet	2R	2R5	non-TE non-Satellite
nw>contig12782|size98|read80|cov31.86_37229	armHet	2R	2R5	non-TE non-Satellite
nw>contig12850|size123|read70|cov20.59_22234	armHet	2R	2R5	non-TE non-Satellite
nw>contig12958|size160|read85|cov20.80_33242	armHet	2R	2R5	non-TE non-Satellite
nw>contig12963|size386|read204|cov20.60_82243	armHet	2R	2R5	non-TE non-Satellite
nw>contig13262|size304|read191|cov23.37_201271	armHet	2R	2R5	non-TE non-Satellite
nw>contig13298|size226|read163|cov27.65_114276	armHet	2R	2R5	non-TE non-Satellite
nw>contig13430|size136|read114|cov29.54_27287	armHet	2R	2R5	non-TE non-Satellite
nw>contig13515|size324|read182|cov20.63_205293	armHet	2R	2R5	non-TE non-Satellite
nw>contig13602|size104|read62|cov22.88_17298	armHet	2R	2R5	non-TE non-Satellite
nw>contig13670|size1161|read767|cov24.44_15300	armHet	2R	2R5	non-TE non-Satellite
nw>contig14160|size635|read440|cov25.87_235333	armHet	2R	2R5	non-TE non-Satellite
nw>contig14202|size1210|read713|cov22.67_945335	armHet	2R	2R5	non-TE non-Satellite
nw>contig14282|size396|read226|cov21.37_132339	armHet	2R	2R5	non-TE non-Satellite
nw>contig14320|size625|read388|cov23.54_49343	armHet	2R	2R5	non-TE non-Satellite
nw>contig14356|size358|read220|cov22.89_77346	armHet	2R	2R5	non-TE non-Satellite
nw>contig14378|size1279|read725|cov21.34_101347	armHet	2R	2R5	non-TE non-Satellite
nw>contig14390|size797|read491|cov22.95_614348	armHet	2R	2R5	non-TE non-Satellite
nw>contig14506|size1372|read798|cov21.88_839356	armHet	2R	2R5	non-TE non-Satellite
nw>contig14639|size537|read322|cov22.09_219363	armHet	2R	2R5	non-TE non-Satellite
nw>contig14657|size1274|read826|cov23.61_554364	armHet	2R	2R5	non-TE non-Satellite
nw>contig14869|size673|read375|cov20.93_176377	armHet	2R	2R5	non-TE non-Satellite
nw>contig14892|size84|read61|cov27.75_6379	armHet	2R	2R5	non-TE non-Satellite
nw>contig14935|size421|read227|cov20.40_191381	armHet	2R	2R5	non-TE non-Satellite
nw>contig14997|size381|read278|cov26.53_49385	armHet	2R	2R5	non-TE non-Satellite
nw>contig15244|size128|read122|cov36.48_36399	armHet	2R	2R5	non-TE non-Satellite
nw>contig15533|size196|read113|cov21.31_33415	armHet	2R	2R5	non-TE non-Satellite
nw>contig15534|size315|read187|cov22.10_110416	armHet	2R	2R5	non-TE non-Satellite
nw>contig15657|size878|read487|cov20.98_728423	armHet	2R	2R5	non-TE non-Satellite
nw>contig16001|size431|read232|cov20.35_165451	armHet	2R	2R5	non-TE non-Satellite
nw>contig16085|size862|read559|cov24.26_12454	armHet	2R	2R5	non-TE non-Satellite
nw>contig16108|size1144|read672|cov22.42_393456	armHet	2R	2R5	non-TE non-Satellite
nw>contig16286|size756|read514|cov24.96_178463	armHet	2R	2R5	non-TE non-Satellite
nw>contig16484|size1375|read753|cov20.79_1162478	armHet	2R	2R5	non-TE non-Satellite
nw>contig16646|size131|read100|cov28.12_0487	armHet	2R	2R5	non-TE non-Satellite
nw>contig16727|size111|read82|cov27.30_40492	armHet	2R	2R5	non-TE non-Satellite
nw>contig16849|size197|read167|cov31.46_105495	armHet	2R	2R5	non-TE non-Satellite
nw>contig16863|size111|read87|cov29.12_28497	armHet	2R	2R5	non-TE non-Satellite
nw>contig17102|size734|read437|cov22.49_420513	armHet	2R	2R5	non-TE non-Satellite
nw>contig17549|size632|read344|cov20.76_444532	armHet	2R	2R5	non-TE non-Satellite
nw>contig17558|size486|read258|cov20.44_234534	armHet	2R	2R5	non-TE non-Satellite
nw>contig17572|size226|read170|cov27.22_67535	armHet	2R	2R5	non-TE non-Satellite
nw>contig17677|size215|read188|cov33.53_145541	armHet	2R	2R5	non-TE non-Satellite
nw>contig17894|size307|read191|cov22.79_187554	armHet	2R	2R5	non-TE non-Satellite
nw>contig17989|size157|read89|cov21.26_14562	armHet	2R	2R5	non-TE non-Satellite
nw>contig18171|size330|read275|cov31.59_6567	armHet	2R	2R5	non-TE non-Satellite
nw>contig18205|size571|read335|cov22.46_354569	armHet	2R	2R5	non-TE non-Satellite
nw>contig18345|size471|read290|cov23.16_342575	armHet	2R	2R5	non-TE non-Satellite
nw>contig18419|size81|read67|cov32.22_20583	armHet	2R	2R5	non-TE non-Satellite
nw>contig18434|size178|read98|cov20.44_89584	armHet	2R	2R5	non-TE non-Satellite
nw>contig18439|size463|read246|cov20.13_217585	armHet	2R	2R5	non-TE non-Satellite
nw>contig18637|size174|read140|cov29.09_30602	armHet	2R	2R5	non-TE non-Satellite
nw>contig18710|size100|read93|cov33.44_23606	armHet	2R	2R5	non-TE non-Satellite
nw>contig18722|size899|read598|cov24.76_603607	armHet	2R	2R5	non-TE non-Satellite
nw>contig18774|size372|read227|cov22.61_65612	armHet	2R	2R5	non-TE non-Satellite
nw>contig18905|size197|read109|cov20.43_7618	armHet	2R	2R5	non-TE non-Satellite
nw>contig19348|size597|read347|cov21.34_91630	armHet	2R	2R5	non-TE non-Satellite
nw>contig19445|size314|read193|cov22.79_48635	armHet	2R	2R5	non-TE non-Satellite
nw>contig19667|size909|read484|cov20.23_794644	armHet	2R	2R5	non-TE non-Satellite
nw>contig19684|size147|read128|cov31.44_81645	armHet	2R	2R5	non-TE non-Satellite
nw>contig19921|size109|read72|cov24.93_38656	armHet	2R	2R5	non-TE non-Satellite
nw>contig20279|size193|read202|cov39.26_45667	armHet	2R	2R5	non-TE non-Satellite
nw>contig20384|size173|read98|cov20.62_106672	armHet	2R	2R5	non-TE non-Satellite
nw>contig20418|size202|read152|cov28.23_141674	armHet	2R	2R5	non-TE non-Satellite
nw>contig20435|size111|read65|cov21.39_16675	armHet	2R	2R5	non-TE non-Satellite
nw>contig20628|size154|read139|cov33.86_3681	armHet	2R	2R5	non-TE non-Satellite
nw>contig20739|size292|read160|cov20.54_13687	armHet	2R	2R5	non-TE non-Satellite
nw>contig20748|size132|read90|cov25.39_35688	armHet	2R	2R5	non-TE non-Satellite
nw>contig20929|size526|read320|cov22.72_142692	armHet	2R	2R5	non-TE non-Satellite
nw>contig20961|size300|read185|cov22.84_190695	armHet	2R	2R5	non-TE non-Satellite
nw>contig21102|size231|read133|cov21.24_43701	armHet	2R	2R5	non-TE non-Satellite
nw>contig21144|size226|read185|cov29.82_59705	armHet	2R	2R5	non-TE non-Satellite
nw>contig21219|size911|read516|cov21.00_531707	armHet	2R	2R5	non-TE non-Satellite
nw>contig21426|size136|read99|cov27.29_0723	armHet	2R	2R5	non-TE non-Satellite
nw>contig21510|size1058|read598|cov21.11_555728	armHet	2R	2R5	non-TE non-Satellite
nw>contig21555|size119|read119|cov36.15_44729	armHet	2R	2R5	non-TE non-Satellite
nw>contig21671|size201|read119|cov21.99_140731	armHet	2R	2R5	non-TE non-Satellite
nw>contig22055|size376|read249|cov25.07_180748	armHet	2R	2R5	non-TE non-Satellite
nw>contig22893|size372|read225|cov22.77_131768	armHet	2R	2R5	non-TE non-Satellite
nw>contig23361|size981|read556|cov21.59_105780	armHet	2R	2R5	non-TE non-Satellite
nw>contig23729|size260|read154|cov22.07_74791	armHet	2R	2R5	non-TE non-Satellite
nw>contig2432|size404|read1069|cov99.72_75813	armHet	2R	2R5	non-TE non-Satellite
nw>contig24322|size122|read78|cov24.86_17812	armHet	2R	2R5	non-TE non-Satellite
nw>contig24543|size102|read72|cov25.96_39818	armHet	2R	2R5	non-TE non-Satellite
nw>contig24831|size364|read194|cov20.39_200827	armHet	2R	2R5	non-TE non-Satellite
nw>contig25021|size140|read90|cov24.51_69832	armHet	2R	2R5	non-TE non-Satellite
nw>contig25065|size141|read80|cov21.21_76833	armHet	2R	2R5	non-TE non-Satellite
nw>contig25347|size520|read305|cov21.86_71841	armHet	2R	2R5	non-TE non-Satellite
nw>contig25619|size493|read277|cov21.98_79848	armHet	2R	2R5	non-TE non-Satellite
nw>contig2567|size82|read93|cov37.38_19850	armHet	2R	2R5	non-TE non-Satellite
nw>contig25910|size101|read62|cov22.59_24857	armHet	2R	2R5	non-TE non-Satellite
nw>contig26040|size304|read184|cov21.97_20861	armHet	2R	2R5	non-TE non-Satellite
nw>contig26184|size846|read481|cov21.43_353864	armHet	2R	2R5	non-TE non-Satellite
nw>contig2699|size256|read725|cov104.26_2887	armHet	2R	2R5	non-TE non-Satellite
nw>contig27067|size78|read78|cov36.92_12890	armHet	2R	2R5	non-TE non-Satellite
nw>contig27105|size435|read237|cov20.94_81891	armHet	2R	2R5	non-TE non-Satellite
nw>contig27108|size147|read125|cov33.01_7892	armHet	2R	2R5	non-TE non-Satellite
nw>contig27566|size516|read282|cov20.41_159904	armHet	2R	2R5	non-TE non-Satellite
nw>contig27634|size421|read237|cov20.47_193906	armHet	2R	2R5	non-TE non-Satellite
nw>contig27714|size156|read97|cov24.43_30908	armHet	2R	2R5	non-TE non-Satellite
nw>contig27943|size1047|read574|cov20.49_303911	armHet	2R	2R5	non-TE non-Satellite
nw>contig29218|size162|read104|cov24.03_83938	armHet	2R	2R5	non-TE non-Satellite
nw>contig29237|size579|read355|cov23.07_196939	armHet	2R	2R5	non-TE non-Satellite
nw>contig3025|size117|read175|cov54.95_16963	armHet	2R	2R5	non-TE non-Satellite
nw>contig30282|size192|read123|cov23.64_77965	armHet	2R	2R5	non-TE non-Satellite
nw>contig30562|size177|read100|cov21.08_29973	armHet	2R	2R5	non-TE non-Satellite
nw>contig30638|size148|read81|cov20.96_56977	armHet	2R	2R5	non-TE non-Satellite
nw>contig31031|size815|read429|cov20.31_640982	armHet	2R	2R5	non-TE non-Satellite
nw>contig31457|size236|read161|cov24.94_162987	armHet	2R	2R5	non-TE non-Satellite
nw>contig32284|size88|read48|cov20.31_25996	armHet	2R	2R5	non-TE non-Satellite
nw>contig32323|size280|read159|cov21.33_45999	armHet	2R	2R5	non-TE non-Satellite
nw>contig32405|size245|read132|cov20.96_911000	armHet	2R	2R5	non-TE non-Satellite
nw>contig32536|size268|read155|cov21.61_1091002	armHet	2R	2R5	non-TE non-Satellite
nw>contig32815|size82|read60|cov27.38_11008	armHet	2R	2R5	non-TE non-Satellite
nw>contig32905|size137|read79|cov22.14_411009	armHet	2R	2R5	non-TE non-Satellite
nw>contig33027|size368|read204|cov21.38_1301010	armHet	2R	2R5	non-TE non-Satellite
nw>contig33069|size105|read71|cov25.31_201011	armHet	2R	2R5	non-TE non-Satellite
nw>contig33499|size190|read124|cov23.57_141020	armHet	2R	2R5	non-TE non-Satellite
nw>contig33507|size321|read192|cov23.04_1261021	armHet	2R	2R5	non-TE non-Satellite
nw>contig33556|size258|read207|cov31.07_981022	armHet	2R	2R5	non-TE non-Satellite
nw>contig34267|size166|read144|cov32.47_281034	armHet	2R	2R5	non-TE non-Satellite
nw>contig34368|size395|read269|cov25.21_1761037	armHet	2R	2R5	non-TE non-Satellite
nw>contig34509|size501|read290|cov21.32_1991038	armHet	2R	2R5	non-TE non-Satellite
nw>contig34801|size631|read369|cov21.87_2971040	armHet	2R	2R5	non-TE non-Satellite
nw>contig34854|size618|read339|cov20.72_3541041	armHet	2R	2R5	non-TE non-Satellite
nw>contig34940|size110|read71|cov23.09_441042	armHet	2R	2R5	non-TE non-Satellite
nw>contig3500|size338|read567|cov62.43_1561043	armHet	2R	2R5	non-TE non-Satellite
nw>contig3544|size551|read892|cov60.14_3791050	armHet	2R	2R5	non-TE non-Satellite
nw>contig35652|size432|read237|cov20.84_491052	armHet	2R	2R5	non-TE non-Satellite
nw>contig35730|size331|read181|cov20.53_1151053	armHet	2R	2R5	non-TE non-Satellite
nw>contig36231|size265|read143|cov21.13_471063	armHet	2R	2R5	non-TE non-Satellite
nw>contig36519|size214|read121|cov21.05_621070	armHet	2R	2R5	non-TE non-Satellite
nw>contig37688|size118|read62|cov20.21_101078	armHet	2R	2R5	non-TE non-Satellite
nw>contig3848|size91|read107|cov42.31_311088	armHet	2R	2R5	non-TE non-Satellite
nw>contig38617|size281|read151|cov20.84_961093	armHet	2R	2R5	non-TE non-Satellite
nw>contig38720|size258|read166|cov24.23_1511096	armHet	2R	2R5	non-TE non-Satellite
nw>contig39231|size357|read211|cov22.20_1731105	armHet	2R	2R5	non-TE non-Satellite
nw>contig3934|size855|read531|cov22.66_921108	armHet	2R	2R5	non-TE non-Satellite
nw>contig39823|size136|read104|cov28.82_351111	armHet	2R	2R5	non-TE non-Satellite
nw>contig41158|size250|read135|cov20.40_1691133	armHet	2R	2R5	non-TE non-Satellite
nw>contig4145|size589|read1754|cov112.60_3461136	armHet	2R	2R5	non-TE non-Satellite
nw>contig4166|size361|read419|cov42.52_2341138	armHet	2R	2R5	non-TE non-Satellite
nw>contig41833|size554|read373|cov25.43_1391139	armHet	2R	2R5	non-TE non-Satellite
nw>contig42639|size198|read118|cov22.27_901148	armHet	2R	2R5	non-TE non-Satellite
nw>contig42834|size246|read140|cov20.82_641152	armHet	2R	2R5	non-TE non-Satellite
nw>contig4723|size504|read1413|cov106.11_4441197	armHet	2R	2R5	non-TE non-Satellite
nw>contig47467|size442|read272|cov22.98_1891201	armHet	2R	2R5	non-TE non-Satellite
nw>contig48698|size105|read92|cov32.89_411212	armHet	2R	2R5	non-TE non-Satellite
nw>contig4889|size164|read162|cov36.27_331213	armHet	2R	2R5	non-TE non-Satellite
nw>contig5068|size376|read237|cov23.09_981231	armHet	2R	2R5	non-TE non-Satellite
nw>contig51123|size127|read93|cov26.93_221238	armHet	2R	2R5	non-TE non-Satellite
nw>contig5204|size450|read788|cov65.35_3401247	armHet	2R	2R5	non-TE non-Satellite
nw>contig5255|size243|read510|cov76.71_81252	armHet	2R	2R5	non-TE non-Satellite
nw>contig5261|size88|read132|cov53.69_161253	armHet	2R	2R5	non-TE non-Satellite
nw>contig5288|size316|read196|cov23.45_891256	armHet	2R	2R5	non-TE non-Satellite
nw>contig5331|size249|read468|cov70.80_1311259	armHet	2R	2R5	non-TE non-Satellite
nw>contig5453|size701|read391|cov21.26_5031273	armHet	2R	2R5	non-TE non-Satellite
nw>contig5719|size92|read151|cov58.57_261296	armHet	2R	2R5	non-TE non-Satellite
nw>contig57361|size75|read47|cov24.49_41299	armHet	2R	2R5	non-TE non-Satellite
nw>contig5760|size165|read116|cov25.31_771302	armHet	2R	2R5	non-TE non-Satellite
nw>contig5836|size115|read147|cov46.92_431308	armHet	2R	2R5	non-TE non-Satellite
nw>contig5887|size595|read344|cov21.77_3651316	armHet	2R	2R5	non-TE non-Satellite
nw>contig58876|size162|read96|cov22.48_11315	armHet	2R	2R5	non-TE non-Satellite
nw>contig5916|size135|read183|cov50.65_351319	armHet	2R	2R5	non-TE non-Satellite
nw>contig6122|size118|read121|cov36.36_91336	armHet	2R	2R5	non-TE non-Satellite
nw>contig6189|size1630|read1062|cov24.21_13371346	armHet	2R	2R5	non-TE non-Satellite
nw>contig6251|size751|read500|cov24.35_1471353	armHet	2R	2R5	non-TE non-Satellite
nw>contig6252|size399|read253|cov23.28_3211354	armHet	2R	2R5	non-TE non-Satellite
nw>contig6427|size1015|read685|cov25.01_5101362	armHet	2R	2R5	non-TE non-Satellite
nw>contig6453|size188|read140|cov28.69_1021365	armHet	2R	2R5	non-TE non-Satellite
nw>contig68532|size435|read236|cov21.41_2581393	armHet	2R	2R5	non-TE non-Satellite
nw>contig6871|size473|read916|cov73.27_1121397	armHet	2R	2R5	non-TE non-Satellite
nw>contig6878|size165|read154|cov33.44_521398	armHet	2R	2R5	non-TE non-Satellite
nw>contig6957|size1095|read596|cov20.52_1981412	armHet	2R	2R5	non-TE non-Satellite
nw>contig71356|size121|read65|cov20.34_151428	armHet	2R	2R5	non-TE non-Satellite
nw>contig7220|size324|read364|cov41.92_961437	armHet	2R	2R5	non-TE non-Satellite
nw>contig7239|size406|read422|cov38.15_761440	armHet	2R	2R5	non-TE non-Satellite
nw>contig7347|size72|read61|cov30.79_121448	armHet	2R	2R5	non-TE non-Satellite
nw>contig7429|size831|read500|cov22.64_131454	armHet	2R	2R5	non-TE non-Satellite
nw>contig7574|size99|read94|cov35.68_131473	armHet	2R	2R5	non-TE non-Satellite
nw>contig7638|size167|read261|cov57.56_231478	armHet	2R	2R5	non-TE non-Satellite
nw>contig7640|size251|read339|cov50.20_1601480	armHet	2R	2R5	non-TE non-Satellite
nw>contig7670|size86|read57|cov25.93_01485	armHet	2R	2R5	non-TE non-Satellite
nw>contig7683|size111|read73|cov24.99_01489	armHet	2R	2R5	non-TE non-Satellite
nw>contig7858|size335|read304|cov32.99_831502	armHet	2R	2R5	non-TE non-Satellite
nw>contig7974|size1128|read725|cov23.63_8641519	armHet	2R	2R5	non-TE non-Satellite
nw>contig8042|size1104|read1076|cov36.97_7271522	armHet	2R	2R5	non-TE non-Satellite
nw>contig8043|size375|read207|cov20.09_1811523	armHet	2R	2R5	non-TE non-Satellite
nw>contig8374|size798|read453|cov21.19_6191559	armHet	2R	2R5	non-TE non-Satellite
nw>contig8505|size347|read374|cov40.65_2571568	armHet	2R	2R5	non-TE non-Satellite
nw>contig8537|size819|read448|cov20.62_951575	armHet	2R	2R5	non-TE non-Satellite
nw>contig8792|size253|read378|cov55.44_811591	armHet	2R	2R5	non-TE non-Satellite
nw>contig8818|size175|read120|cov25.34_521593	armHet	2R	2R5	non-TE non-Satellite
nw>contig8859|size537|read513|cov36.83_4501595	armHet	2R	2R5	non-TE non-Satellite
nw>contig8950|size386|read417|cov40.26_751602	armHet	2R	2R5	non-TE non-Satellite
nw>contig9006|size514|read557|cov40.70_1671608	armHet	2R	2R5	non-TE non-Satellite
nw>contig9039|size406|read221|cov20.08_3211615	armHet	2R	2R5	non-TE non-Satellite
nw>contig9133|size308|read287|cov33.99_2001621	armHet	2R	2R5	non-TE non-Satellite
nw>contig9342|size1677|read1094|cov24.24_12081637	armHet	2R	2R5	non-TE non-Satellite
nw>contig9456|size126|read126|cov37.97_631645	armHet	2R	2R5	non-TE non-Satellite
nw>contig9457|size201|read118|cov22.04_1211646	armHet	2R	2R5	non-TE non-Satellite
nw>contig9496|size219|read236|cov39.67_991647	armHet	2R	2R5	non-TE non-Satellite
nw>contig9616|size341|read272|cov30.76_1161660	armHet	2R	2R5	non-TE non-Satellite
nw>contig9665|size943|read516|cov20.86_2221663	armHet	2R	2R5	non-TE non-Satellite
nw>contig9762|size177|read173|cov35.89_1001673	armHet	2R	2R5	non-TE non-Satellite
nw>contig9853|size673|read364|cov20.26_3541684	armHet	2R	2R5	non-TE non-Satellite
nw>contig9858|size637|read355|cov20.15_1151685	armHet	2R	2R5	non-TE non-Satellite
nw>contig9972|size166|read145|cov31.66_21690	armHet	2R	2R5	non-TE non-Satellite
nw>contig11212|size106|read86|cov32.70_46104	armHet	2R	2R5	TE	HMS-Beagle2
nw>contig11826|size113|read112|cov37.12_2156	armHet	2R	2R5	TE	INE-1
nw>contig12564|size225|read120|cov20.52_85212	armHet	2R	2R5	TE	gypsy6
nw>contig13131|size408|read288|cov26.24_314259	armHet	2R	2R5	TE	1360
nw>contig13368|size566|read479|cov31.69_423282	armHet	2R	2R5	TE	17.6
nw>contig14503|size216|read151|cov24.72_38355	armHet	2R	2R5	TE	Cr1a
nw>contig15268|size584|read373|cov23.83_59400	armHet	2R	2R5	TE	gypsy5
nw>contig15323|size265|read148|cov20.78_86405	armHet	2R	2R5	TE	297
nw>contig15434|size116|read97|cov30.78_55411	armHet	2R	2R5	TE	INE-1
nw>contig15597|size800|read532|cov24.69_11419	armHet	2R	2R5	TE	Stalker
nw>contig17000|size109|read68|cov22.70_49507	armHet	2R	2R5	TE	Tabor
nw>contig17045|size70|read49|cov26.01_3509	armHet	2R	2R5	TE	rover
nw>contig17486|size153|read123|cov30.41_63529	armHet	2R	2R5	TE	gypsy12
nw>contig18204|size129|read121|cov33.78_45568	armHet	2R	2R5	TE	X
nw>contig20083|size151|read136|cov33.44_37659	armHet	2R	2R5	TE	gypsy
nw>contig24159|size191|read145|cov28.50_84805	armHet	2R	2R5	TE	INE-1
nw>contig24397|size194|read119|cov22.13_32815	armHet	2R	2R5	TE	accord2
nw>contig26819|size224|read128|cov20.54_38882	armHet	2R	2R5	TE	INE-1
nw>contig27119|size118|read82|cov25.60_2893	armHet	2R	2R5	TE	hopper2
nw>contig27995|size190|read131|cov25.75_49913	armHet	2R	2R5	TE	gtwin
nw>contig29886|size122|read70|cov23.87_0948	armHet	2R	2R5	TE	HMS-Beagle2
nw>contig3933|size318|read715|cov83.26_911107	armHet	2R	2R5	TE	HMS-Beagle2
nw>contig4001|size409|read928|cov86.41_41117	armHet	2R	2R5	TE	Stalker2
nw>contig40419|size92|read50|cov20.41_41123	armHet	2R	2R5	TE	Quasimodo
nw>contig41638|size78|read59|cov28.90_31137	armHet	2R	2R5	TE	HMS-Beagle2
nw>contig41870|size77|read69|cov32.06_81141	armHet	2R	2R5	TE	Rt1b
nw>contig47304|size215|read123|cov20.77_291199	armHet	2R	2R5	TE	HB
nw>contig5035|size71|read120|cov60.97_51225	armHet	2R	2R5	TE	Cr1a
nw>contig5289|size124|read205|cov61.65_331257	armHet	2R	2R5	TE	Doc3
nw>contig5521|size141|read266|cov70.19_361277	armHet	2R	2R5	TE	HMS-Beagle2
nw>contig55797|size322|read189|cov21.71_1881282	armHet	2R	2R5	TE	Cr1a
nw>contig6483|size124|read130|cov38.04_291368	armHet	2R	2R5	TE	Cr1a
nw>contig6551|size230|read456|cov74.14_1611377	armHet	2R	2R5	TE	INE-1
nw>contig74798|size165|read90|cov20.65_831461	armHet	2R	2R5	TE	297
nw>contig7825|size223|read133|cov23.14_1081498	armHet	2R	2R5	TE	Doc
nw>contig7845|size86|read60|cov26.93_71501	armHet	2R	2R5	TE	INE-1
nw>contig8708|size99|read141|cov53.98_371586	armHet	2R	2R5	TE	jockey
nw>contig9042|size216|read214|cov37.05_831617	armHet	2R	2R5	TE	gypsy4
nw>contig9712|size117|read87|cov28.37_391667	armHet	2R	2R5	TE	gypsy4
nw>contig9917|size249|read257|cov38.45_1161687	armHet	2R	2R5	TE	gypsy12
nw>contig10126|size221|read229|cov38.33_4710	armHet	2R	2R6	non-TE non-Satellite
nw>contig10399|size467|read497|cov38.98_10430	armHet	2R	2R6	non-TE non-Satellite
nw>contig11472|size1414|read834|cov22.11_985123	armHet	2R	2R6	non-TE non-Satellite
nw>contig11693|size100|read103|cov38.52_27143	armHet	2R	2R6	non-TE non-Satellite
nw>contig12124|size433|read438|cov37.31_318175	armHet	2R	2R6	non-TE non-Satellite
nw>contig12169|size1415|read898|cov23.58_747182	armHet	2R	2R6	non-TE non-Satellite
nw>contig12893|size801|read494|cov22.86_578238	armHet	2R	2R6	non-TE non-Satellite
nw>contig12927|size1506|read863|cov21.95_1277239	armHet	2R	2R6	non-TE non-Satellite
nw>contig13008|size178|read95|cov20.31_84247	armHet	2R	2R6	non-TE non-Satellite
nw>contig13318|size918|read613|cov24.84_524278	armHet	2R	2R6	non-TE non-Satellite
nw>contig13596|size209|read204|cov36.25_75297	armHet	2R	2R6	non-TE non-Satellite
nw>contig13996|size239|read128|cov20.29_140319	armHet	2R	2R6	non-TE non-Satellite
nw>contig14083|size1885|read1228|cov24.42_287325	armHet	2R	2R6	non-TE non-Satellite
nw>contig14145|size456|read265|cov21.43_1331	armHet	2R	2R6	non-TE non-Satellite
nw>contig14228|size535|read559|cov38.90_286336	armHet	2R	2R6	non-TE non-Satellite
nw>contig15469|size146|read101|cov25.67_84413	armHet	2R	2R6	non-TE non-Satellite
nw>contig15671|size347|read192|cov20.54_156424	armHet	2R	2R6	non-TE non-Satellite
nw>contig17199|size785|read433|cov20.28_287518	armHet	2R	2R6	non-TE non-Satellite
nw>contig20646|size2069|read1179|cov21.71_119683	armHet	2R	2R6	non-TE non-Satellite
nw>contig20841|size164|read134|cov30.68_97689	armHet	2R	2R6	non-TE non-Satellite
nw>contig21714|size628|read357|cov21.64_535734	armHet	2R	2R6	non-TE non-Satellite
nw>contig24193|size613|read332|cov20.27_454806	armHet	2R	2R6	non-TE non-Satellite
nw>contig24263|size391|read224|cov21.73_214810	armHet	2R	2R6	non-TE non-Satellite
nw>contig24776|size318|read177|cov20.58_34825	armHet	2R	2R6	non-TE non-Satellite
nw>contig26930|size239|read138|cov21.14_66885	armHet	2R	2R6	non-TE non-Satellite
nw>contig28253|size94|read63|cov26.28_17922	armHet	2R	2R6	non-TE non-Satellite
nw>contig35896|size270|read161|cov21.38_211057	armHet	2R	2R6	non-TE non-Satellite
nw>contig42938|size155|read101|cov25.55_831155	armHet	2R	2R6	non-TE non-Satellite
nw>contig4909|size789|read1350|cov64.22_4141215	armHet	2R	2R6	non-TE non-Satellite
nw>contig61715|size86|read58|cov26.56_51343	armHet	2R	2R6	non-TE non-Satellite
nw>contig66661|size85|read51|cov22.71_151382	armHet	2R	2R6	non-TE non-Satellite
nw>contig6795|size198|read276|cov52.07_1291388	armHet	2R	2R6	non-TE non-Satellite
nw>contig7121|size251|read289|cov43.82_161426	armHet	2R	2R6	non-TE non-Satellite
nw>contig7124|size375|read516|cov52.19_2121427	armHet	2R	2R6	non-TE non-Satellite
nw>contig7394|size132|read111|cov30.99_511452	armHet	2R	2R6	non-TE non-Satellite
nw>contig7801|size459|read260|cov21.22_2661497	armHet	2R	2R6	non-TE non-Satellite
nw>contig8179|size276|read165|cov22.77_51542	armHet	2R	2R6	non-TE non-Satellite
nw>contig8517|size186|read157|cov32.34_1161572	armHet	2R	2R6	non-TE non-Satellite
nw>contig9035|size538|read877|cov61.19_461614	armHet	2R	2R6	non-TE non-Satellite
nw>contig9237|size1060|read658|cov23.13_5731629	armHet	2R	2R6	non-TE non-Satellite
nw>contig9368|size577|read387|cov24.89_3161638	armHet	2R	2R6	non-TE non-Satellite
nw>contig9812|size206|read195|cov35.31_181680	armHet	2R	2R6	non-TE non-Satellite
nw>contig11531|size126|read89|cov25.71_44129	armHet	2R	2R6	TE	G5
nw>contig16947|size414|read251|cov22.22_149503	armHet	2R	2R6	TE	BS
nw>contig22435|size177|read97|cov20.80_106757	armHet	2R	2R6	TE	Cr1a
nw>contig24262|size112|read81|cov25.98_5809	armHet	2R	2R6	TE	G3
nw>contig30391|size214|read121|cov21.11_70969	armHet	2R	2R6	TE	Cr1a
nw>contig47341|size211|read120|cov21.00_831200	armHet	2R	2R6	TE	297
nw>contig7680|size324|read309|cov35.28_1301488	armHet	2R	2R6	TE	Doc
nw>contig9541|size97|read78|cov29.58_51652	armHet	2R	2R6	TE	1360
nw>contig10255|size102|read67|cov24.68_1021	armHet	2R	2Rn	non-TE non-Satellite
nw>contig10307|size427|read492|cov42.24_24828	armHet	2R	2Rn	non-TE non-Satellite
nw>contig10517|size565|read369|cov24.04_29441	armHet	2R	2Rn	non-TE non-Satellite
nw>contig10860|size1033|read629|cov22.96_33465	armHet	2R	2Rn	non-TE non-Satellite
nw>contig11163|size164|read155|cov35.13_95100	armHet	2R	2Rn	non-TE non-Satellite
nw>contig11324|size650|read359|cov20.55_20111	armHet	2R	2Rn	non-TE non-Satellite
nw>contig11643|size103|read79|cov27.86_41138	armHet	2R	2Rn	non-TE non-Satellite
nw>contig12128|size601|read350|cov21.00_199176	armHet	2R	2Rn	non-TE non-Satellite
nw>contig12173|size235|read128|cov20.65_146183	armHet	2R	2Rn	non-TE non-Satellite
nw>contig12416|size2054|read1196|cov22.07_412195	armHet	2R	2Rn	non-TE non-Satellite
nw>contig12444|size1068|read652|cov22.91_765196	armHet	2R	2Rn	non-TE non-Satellite
nw>contig13419|size963|read613|cov23.53_633285	armHet	2R	2Rn	non-TE non-Satellite
nw>contig14067|size248|read131|cov20.00_33324	armHet	2R	2Rn	non-TE non-Satellite
nw>contig14123|size1472|read825|cov21.01_1186327	armHet	2R	2Rn	non-TE non-Satellite
nw>contig14131|size289|read201|cov25.50_122329	armHet	2R	2Rn	non-TE non-Satellite
nw>contig14438|size718|read406|cov21.35_591349	armHet	2R	2Rn	non-TE non-Satellite
nw>contig15364|size118|read76|cov23.83_36407	armHet	2R	2Rn	non-TE non-Satellite
nw>contig16262|size137|read126|cov32.77_13461	armHet	2R	2Rn	non-TE non-Satellite
nw>contig17363|size138|read105|cov28.78_1527	armHet	2R	2Rn	non-TE non-Satellite
nw>contig17553|size130|read108|cov29.68_7533	armHet	2R	2Rn	non-TE non-Satellite
nw>contig17994|size1127|read594|cov20.06_802563	armHet	2R	2Rn	non-TE non-Satellite
nw>contig19039|size900|read608|cov25.34_456624	armHet	2R	2Rn	non-TE non-Satellite
nw>contig21237|size924|read529|cov21.45_246708	armHet	2R	2Rn	non-TE non-Satellite
nw>contig21269|size95|read53|cov21.61_35711	armHet	2R	2Rn	non-TE non-Satellite
nw>contig22535|size724|read391|cov20.51_482759	armHet	2R	2Rn	non-TE non-Satellite
nw>contig22853|size168|read102|cov22.79_9766	armHet	2R	2Rn	non-TE non-Satellite
nw>contig23093|size274|read147|cov20.30_127773	armHet	2R	2Rn	non-TE non-Satellite
nw>contig23868|size545|read318|cov21.36_363794	armHet	2R	2Rn	non-TE non-Satellite
nw>contig24575|size264|read157|cov22.82_190819	armHet	2R	2Rn	non-TE non-Satellite
nw>contig24915|size151|read88|cov21.75_68829	armHet	2R	2Rn	non-TE non-Satellite
nw>contig25863|size188|read124|cov24.45_107855	armHet	2R	2Rn	non-TE non-Satellite
nw>contig26588|size405|read271|cov25.07_181877	armHet	2R	2Rn	non-TE non-Satellite
nw>contig27500|size466|read301|cov23.88_265903	armHet	2R	2Rn	non-TE non-Satellite
nw>contig28049|size185|read105|cov20.94_97916	armHet	2R	2Rn	non-TE non-Satellite
nw>contig29712|size209|read122|cov22.08_103945	armHet	2R	2Rn	non-TE non-Satellite
nw>contig30069|size271|read144|cov20.51_31956	armHet	2R	2Rn	non-TE non-Satellite
nw>contig33857|size168|read89|cov20.48_311028	armHet	2R	2Rn	non-TE non-Satellite
nw>contig38011|size263|read173|cov23.95_1211081	armHet	2R	2Rn	non-TE non-Satellite
nw>contig38087|size202|read140|cov26.21_231083	armHet	2R	2Rn	non-TE non-Satellite
nw>contig38550|size133|read84|cov23.53_691091	armHet	2R	2Rn	non-TE non-Satellite
nw>contig43459|size255|read160|cov23.82_1451161	armHet	2R	2Rn	non-TE non-Satellite
nw>contig44640|size216|read129|cov22.18_911183	armHet	2R	2Rn	non-TE non-Satellite
nw>contig5590|size180|read192|cov38.76_21285	armHet	2R	2Rn	non-TE non-Satellite
nw>contig8041|size340|read219|cov23.36_301521	armHet	2R	2Rn	non-TE non-Satellite
nw>contig8130|size85|read76|cov32.32_231536	armHet	2R	2Rn	non-TE non-Satellite
nw>contig8306|size293|read179|cov22.97_1901553	armHet	2R	2Rn	non-TE non-Satellite
nw>contig8535|size1767|read1133|cov23.66_1811574	armHet	2R	2Rn	non-TE non-Satellite
nw>contig9560|size185|read164|cov32.89_891654	armHet	2R	2Rn	non-TE non-Satellite
nw>contig10147|size96|read70|cov27.07_3613	armHet	2R	2Rn	TE	412
nw>contig10997|size155|read126|cov29.92_8675	armHet	2R	2Rn	TE	Porto1
nw>contig12501|size77|read52|cov24.06_9205	armHet	2R	2Rn	TE	mdg1
nw>contig13230|size152|read102|cov24.96_73268	armHet	2R	2Rn	TE	412
nw>contig14132|size315|read182|cov20.90_250330	armHet	2R	2Rn	TE	297
nw>contig16274|size72|read43|cov21.62_12462	armHet	2R	2Rn	TE	I
nw>contig17070|size126|read94|cov27.78_64511	armHet	2R	2Rn	TE	accord2
nw>contig18770|size122|read101|cov29.57_1611	armHet	2R	2Rn	TE	accord2
nw>contig20488|size723|read441|cov22.33_10678	armHet	2R	2Rn	TE	297
nw>contig28600|size174|read126|cov26.61_96928	armHet	2R	2Rn	TE	INE-1
nw>contig31740|size156|read93|cov22.26_10992	armHet	2R	2Rn	TE	NOF
nw>contig43274|size115|read66|cov21.66_301158	armHet	2R	2Rn	TE	gypsy9
nw>contig46731|size99|read28|cov11.03_258503	armHet	2R	2Rn	TE	G5
nw>contig4947|size108|read142|cov46.81_401219	armHet	2R	2Rn	TE	1360
nw>contig7446|size122|read101|cov31.89_121456	armHet	2R	2Rn	TE	gypsy12
nw>contig10006|size203|read61|cov13.99_584	armHet	3CEN	3CEN	non-TE non-Satellite
nw>contig10040|size124|read23|cov8.22_1126	armHet	3CEN	3CEN	non-TE non-Satellite
nw>contig10102|size209|read95|cov20.45_10455	armHet	3CEN	3CEN	non-TE non-Satellite
nw>contig10174|size107|read30|cov13.49_189	armHet	3CEN	3CEN	non-TE non-Satellite
nw>contig10181|size182|read69|cov18.36_7893	armHet	3CEN	3CEN	non-TE non-Satellite
nw>contig10485|size231|read71|cov14.20_162247	armHet	3CEN	3CEN	non-TE non-Satellite
nw>contig10561|size215|read53|cov11.77_117284	armHet	3CEN	3CEN	non-TE non-Satellite
nw>contig10581|size165|read29|cov8.25_105294	armHet	3CEN	3CEN	non-TE non-Satellite
nw>contig10839|size114|read30|cov12.80_20415	armHet	3CEN	3CEN	non-TE non-Satellite
nw>contig10875|size144|read29|cov9.90_17431	armHet	3CEN	3CEN	non-TE non-Satellite
nw>contig10884|size537|read98|cov8.70_328436	armHet	3CEN	3CEN	non-TE non-Satellite
nw>contig11048|size495|read148|cov14.23_221509	armHet	3CEN	3CEN	non-TE non-Satellite
nw>contig11214|size73|read14|cov8.68_13591	armHet	3CEN	3CEN	non-TE non-Satellite
nw>contig11324|size125|read39|cov13.71_3649	armHet	3CEN	3CEN	non-TE non-Satellite
nw>contig11528|size561|read172|cov14.40_497767	armHet	3CEN	3CEN	non-TE non-Satellite
nw>contig11645|size423|read79|cov8.70_153814	armHet	3CEN	3CEN	non-TE non-Satellite
nw>contig11760|size134|read33|cov11.80_54866	armHet	3CEN	3CEN	non-TE non-Satellite
nw>contig12016|size135|read25|cov8.97_69949	armHet	3CEN	3CEN	non-TE non-Satellite
nw>contig12199|size71|read19|cov12.30_01015	armHet	3CEN	3CEN	non-TE non-Satellite
nw>contig12252|size164|read37|cov10.63_91036	armHet	3CEN	3CEN	non-TE non-Satellite
nw>contig12255|size137|read24|cov8.57_731038	armHet	3CEN	3CEN	non-TE non-Satellite
nw>contig12345|size411|read74|cov8.45_1021070	armHet	3CEN	3CEN	non-TE non-Satellite
nw>contig12357|size101|read23|cov10.88_231074	armHet	3CEN	3CEN	non-TE non-Satellite
nw>contig12524|size415|read103|cov11.77_1881129	armHet	3CEN	3CEN	non-TE non-Satellite
nw>contig12533|size101|read24|cov10.61_21133	armHet	3CEN	3CEN	non-TE non-Satellite
nw>contig12641|size270|read75|cov12.37_1851171	armHet	3CEN	3CEN	non-TE non-Satellite
nw>contig12683|size189|read41|cov9.98_571191	armHet	3CEN	3CEN	non-TE non-Satellite
nw>contig12732|size246|read76|cov15.01_1771208	armHet	3CEN	3CEN	non-TE non-Satellite
nw>contig12759|size145|read27|cov8.94_791218	armHet	3CEN	3CEN	non-TE non-Satellite
nw>contig12927|size108|read18|cov8.44_421274	armHet	3CEN	3CEN	non-TE non-Satellite
nw>contig13143|size180|read44|cov10.41_781355	armHet	3CEN	3CEN	non-TE non-Satellite
nw>contig13332|size91|read71|cov28.01_13280	armHet	3CEN	3CEN	non-TE non-Satellite
nw>contig13518|size183|read50|cov13.05_881503	armHet	3CEN	3CEN	non-TE non-Satellite
nw>contig13669|size123|read23|cov8.35_21553	armHet	3CEN	3CEN	non-TE non-Satellite
nw>contig13759|size102|read20|cov9.35_41588	armHet	3CEN	3CEN	non-TE non-Satellite
nw>contig14089|size450|read92|cov9.96_1051706	armHet	3CEN	3CEN	non-TE non-Satellite
nw>contig14253|size130|read47|cov16.58_131764	armHet	3CEN	3CEN	non-TE non-Satellite
nw>contig14300|size195|read35|cov8.32_1221780	armHet	3CEN	3CEN	non-TE non-Satellite
nw>contig14503|size166|read49|cov13.32_181853	armHet	3CEN	3CEN	non-TE non-Satellite
nw>contig14665|size400|read68|cov8.23_981907	armHet	3CEN	3CEN	non-TE non-Satellite
nw>contig14814|size267|read51|cov8.72_491966	armHet	3CEN	3CEN	non-TE non-Satellite
nw>contig15114|size103|read31|cov15.16_352082	armHet	3CEN	3CEN	non-TE non-Satellite
nw>contig15126|size148|read33|cov10.77_142087	armHet	3CEN	3CEN	non-TE non-Satellite
nw>contig15189|size388|read74|cov9.14_2522107	armHet	3CEN	3CEN	non-TE non-Satellite
nw>contig15209|size209|read37|cov8.10_1262114	armHet	3CEN	3CEN	non-TE non-Satellite
nw>contig15258|size265|read78|cov13.98_692135	armHet	3CEN	3CEN	non-TE non-Satellite
nw>contig15390|size102|read18|cov8.61_412184	armHet	3CEN	3CEN	non-TE non-Satellite
nw>contig15467|size551|read105|cov8.94_3352209	armHet	3CEN	3CEN	non-TE non-Satellite
nw>contig15480|size269|read53|cov9.14_192216	armHet	3CEN	3CEN	non-TE non-Satellite
nw>contig15536|size184|read35|cov9.48_452236	armHet	3CEN	3CEN	non-TE non-Satellite
nw>contig15577|size557|read155|cov12.92_3282254	armHet	3CEN	3CEN	non-TE non-Satellite
nw>contig15600|size161|read27|cov8.13_472263	armHet	3CEN	3CEN	non-TE non-Satellite
nw>contig15622|size99|read18|cov8.05_192274	armHet	3CEN	3CEN	non-TE non-Satellite
nw>contig15810|size208|read36|cov8.32_402341	armHet	3CEN	3CEN	non-TE non-Satellite
nw>contig15919|size546|read192|cov16.46_2662385	armHet	3CEN	3CEN	non-TE non-Satellite
nw>contig16139|size84|read17|cov9.48_02463	armHet	3CEN	3CEN	non-TE non-Satellite
nw>contig16142|size142|read31|cov10.22_342465	armHet	3CEN	3CEN	non-TE non-Satellite
nw>contig16325|size106|read26|cov12.16_72529	armHet	3CEN	3CEN	non-TE non-Satellite
nw>contig16501|size87|read18|cov8.70_12577	armHet	3CEN	3CEN	non-TE non-Satellite
nw>contig16824|size330|read55|cov8.01_1512685	armHet	3CEN	3CEN	non-TE non-Satellite
nw>contig16868|size139|read23|cov8.07_632704	armHet	3CEN	3CEN	non-TE non-Satellite
nw>contig16995|size73|read19|cov13.03_62755	armHet	3CEN	3CEN	non-TE non-Satellite
nw>contig17129|size159|read46|cov12.33_942802	armHet	3CEN	3CEN	non-TE non-Satellite
nw>contig17242|size205|read57|cov13.30_272836	armHet	3CEN	3CEN	non-TE non-Satellite
nw>contig17244|size74|read16|cov10.38_32838	armHet	3CEN	3CEN	non-TE non-Satellite
nw>contig17415|size287|read59|cov9.78_802902	armHet	3CEN	3CEN	non-TE non-Satellite
nw>contig17565|size119|read20|cov8.04_572945	armHet	3CEN	3CEN	non-TE non-Satellite
nw>contig17862|size204|read39|cov9.13_433045	armHet	3CEN	3CEN	non-TE non-Satellite
nw>contig17870|size138|read26|cov8.88_93049	armHet	3CEN	3CEN	non-TE non-Satellite
nw>contig18103|size351|read89|cov12.05_43126	armHet	3CEN	3CEN	non-TE non-Satellite
nw>contig18173|size234|read55|cov10.72_163153	armHet	3CEN	3CEN	non-TE non-Satellite
nw>contig18210|size293|read92|cov14.86_283164	armHet	3CEN	3CEN	non-TE non-Satellite
nw>contig18666|size147|read26|cov8.43_613310	armHet	3CEN	3CEN	non-TE non-Satellite
nw>contig18667|size291|read69|cov10.48_923311	armHet	3CEN	3CEN	non-TE non-Satellite
nw>contig18796|size320|read105|cov15.19_13348	armHet	3CEN	3CEN	non-TE non-Satellite
nw>contig18850|size213|read58|cov12.83_73359	armHet	3CEN	3CEN	non-TE non-Satellite
nw>contig18887|size71|read16|cov8.37_73370	armHet	3CEN	3CEN	non-TE non-Satellite
nw>contig18992|size204|read44|cov10.30_933403	armHet	3CEN	3CEN	non-TE non-Satellite
nw>contig19106|size116|read30|cov11.51_553439	armHet	3CEN	3CEN	non-TE non-Satellite
nw>contig19278|size123|read23|cov8.37_203490	armHet	3CEN	3CEN	non-TE non-Satellite
nw>contig19327|size201|read70|cov16.50_483508	armHet	3CEN	3CEN	non-TE non-Satellite
nw>contig19352|size116|read28|cov11.31_113518	armHet	3CEN	3CEN	non-TE non-Satellite
nw>contig19880|size325|read80|cov11.71_2633679	armHet	3CEN	3CEN	non-TE non-Satellite
nw>contig20014|size86|read17|cov9.31_243719	armHet	3CEN	3CEN	non-TE non-Satellite
nw>contig20088|size320|read60|cov8.72_1673740	armHet	3CEN	3CEN	non-TE non-Satellite
nw>contig20383|size87|read16|cov8.31_233821	armHet	3CEN	3CEN	non-TE non-Satellite
nw>contig20492|size339|read62|cov8.77_73855	armHet	3CEN	3CEN	non-TE non-Satellite
nw>contig20874|size130|read22|cov8.07_33969	armHet	3CEN	3CEN	non-TE non-Satellite
nw>contig20902|size128|read28|cov10.66_493980	armHet	3CEN	3CEN	non-TE non-Satellite
nw>contig21520|size89|read16|cov8.40_44147	armHet	3CEN	3CEN	non-TE non-Satellite
nw>contig21633|size194|read34|cov8.20_654177	armHet	3CEN	3CEN	non-TE non-Satellite
nw>contig21667|size202|read45|cov10.94_1254186	armHet	3CEN	3CEN	non-TE non-Satellite
nw>contig21698|size128|read34|cov12.81_384195	armHet	3CEN	3CEN	non-TE non-Satellite
nw>contig21810|size135|read26|cov9.35_264218	armHet	3CEN	3CEN	non-TE non-Satellite
nw>contig21852|size304|read64|cov9.63_2034228	armHet	3CEN	3CEN	non-TE non-Satellite
nw>contig21938|size323|read57|cov8.19_1284251	armHet	3CEN	3CEN	non-TE non-Satellite
nw>contig21977|size110|read20|cov8.84_04267	armHet	3CEN	3CEN	non-TE non-Satellite
nw>contig21989|size108|read25|cov10.67_484269	armHet	3CEN	3CEN	non-TE non-Satellite
nw>contig22027|size150|read29|cov9.57_904282	armHet	3CEN	3CEN	non-TE non-Satellite
nw>contig22088|size83|read18|cov9.99_14296	armHet	3CEN	3CEN	non-TE non-Satellite
nw>contig22351|size239|read42|cov8.47_524364	armHet	3CEN	3CEN	non-TE non-Satellite
nw>contig22663|size615|read107|cov8.18_1044445	armHet	3CEN	3CEN	non-TE non-Satellite
nw>contig22691|size203|read43|cov9.79_1424456	armHet	3CEN	3CEN	non-TE non-Satellite
nw>contig22698|size92|read17|cov9.04_194457	armHet	3CEN	3CEN	non-TE non-Satellite
nw>contig23009|size164|read32|cov9.11_574548	armHet	3CEN	3CEN	non-TE non-Satellite
nw>contig23070|size122|read22|cov8.39_24569	armHet	3CEN	3CEN	non-TE non-Satellite
nw>contig23278|size408|read86|cov9.76_1004620	armHet	3CEN	3CEN	non-TE non-Satellite
nw>contig23280|size405|read91|cov10.77_1004622	armHet	3CEN	3CEN	non-TE non-Satellite
nw>contig23610|size331|read78|cov10.63_14717	armHet	3CEN	3CEN	non-TE non-Satellite
nw>contig23803|size256|read92|cov16.25_1224765	armHet	3CEN	3CEN	non-TE non-Satellite
nw>contig23933|size332|read70|cov9.47_124793	armHet	3CEN	3CEN	non-TE non-Satellite
nw>contig24418|size104|read19|cov9.31_364912	armHet	3CEN	3CEN	non-TE non-Satellite
nw>contig24429|size171|read31|cov8.45_194914	armHet	3CEN	3CEN	non-TE non-Satellite
nw>contig24544|size157|read45|cov14.03_494944	armHet	3CEN	3CEN	non-TE non-Satellite
nw>contig24931|size160|read32|cov9.82_305040	armHet	3CEN	3CEN	non-TE non-Satellite
nw>contig25214|size76|read14|cov8.62_05108	armHet	3CEN	3CEN	non-TE non-Satellite
nw>contig25391|size196|read34|cov8.20_95151	armHet	3CEN	3CEN	non-TE non-Satellite
nw>contig25596|size95|read17|cov8.04_225194	armHet	3CEN	3CEN	non-TE non-Satellite
nw>contig25607|size224|read39|cov8.72_835196	armHet	3CEN	3CEN	non-TE non-Satellite
nw>contig25689|size143|read41|cov13.55_105220	armHet	3CEN	3CEN	non-TE non-Satellite
nw>contig26735|size162|read34|cov9.98_645480	armHet	3CEN	3CEN	non-TE non-Satellite
nw>contig26767|size173|read41|cov11.47_615487	armHet	3CEN	3CEN	non-TE non-Satellite
nw>contig26805|size177|read45|cov12.02_345500	armHet	3CEN	3CEN	non-TE non-Satellite
nw>contig26934|size211|read46|cov10.77_15528	armHet	3CEN	3CEN	non-TE non-Satellite
nw>contig26965|size90|read19|cov10.14_05536	armHet	3CEN	3CEN	non-TE non-Satellite
nw>contig28013|size74|read21|cov13.47_05748	armHet	3CEN	3CEN	non-TE non-Satellite
nw>contig28606|size125|read23|cov9.05_545870	armHet	3CEN	3CEN	non-TE non-Satellite
nw>contig2897|size161|read36|cov10.60_675961	armHet	3CEN	3CEN	non-TE non-Satellite
nw>contig29797|size115|read22|cov9.39_96122	armHet	3CEN	3CEN	non-TE non-Satellite
nw>contig30140|size304|read73|cov10.93_2446191	armHet	3CEN	3CEN	non-TE non-Satellite
nw>contig30378|size189|read40|cov9.95_1246237	armHet	3CEN	3CEN	non-TE non-Satellite
nw>contig30452|size213|read59|cov13.42_806259	armHet	3CEN	3CEN	non-TE non-Satellite
nw>contig30886|size83|read19|cov9.42_46351	armHet	3CEN	3CEN	non-TE non-Satellite
nw>contig30894|size311|read57|cov8.82_2496353	armHet	3CEN	3CEN	non-TE non-Satellite
nw>contig31069|size180|read45|cov11.18_1066386	armHet	3CEN	3CEN	non-TE non-Satellite
nw>contig31126|size127|read23|cov8.96_446398	armHet	3CEN	3CEN	non-TE non-Satellite
nw>contig31201|size215|read37|cov8.21_336419	armHet	3CEN	3CEN	non-TE non-Satellite
nw>contig31818|size235|read44|cov8.73_1476530	armHet	3CEN	3CEN	non-TE non-Satellite
nw>contig31842|size179|read49|cov12.79_286533	armHet	3CEN	3CEN	non-TE non-Satellite
nw>contig31884|size280|read46|cov8.02_326541	armHet	3CEN	3CEN	non-TE non-Satellite
nw>contig32005|size169|read33|cov9.26_56558	armHet	3CEN	3CEN	non-TE non-Satellite
nw>contig32052|size203|read38|cov8.99_386566	armHet	3CEN	3CEN	non-TE non-Satellite
nw>contig32649|size98|read17|cov8.18_06688	armHet	3CEN	3CEN	non-TE non-Satellite
nw>contig33056|size273|read69|cov11.83_2066763	armHet	3CEN	3CEN	non-TE non-Satellite
nw>contig33267|size218|read38|cov8.50_16793	armHet	3CEN	3CEN	non-TE non-Satellite
nw>contig33280|size175|read38|cov10.73_436796	armHet	3CEN	3CEN	non-TE non-Satellite
nw>contig33424|size103|read20|cov9.30_356830	armHet	3CEN	3CEN	non-TE non-Satellite
nw>contig33956|size267|read55|cov9.64_1256909	armHet	3CEN	3CEN	non-TE non-Satellite
nw>contig33961|size248|read56|cov10.65_96911	armHet	3CEN	3CEN	non-TE non-Satellite
nw>contig34361|size365|read80|cov10.16_1586982	armHet	3CEN	3CEN	non-TE non-Satellite
nw>contig34445|size88|read18|cov10.07_56996	armHet	3CEN	3CEN	non-TE non-Satellite
nw>contig35023|size209|read37|cov8.61_987084	armHet	3CEN	3CEN	non-TE non-Satellite
nw>contig3503|size490|read254|cov24.97_157090	armHet	3CEN	3CEN	non-TE non-Satellite
nw>contig35041|size96|read16|cov8.20_237091	armHet	3CEN	3CEN	non-TE non-Satellite
nw>contig35121|size255|read51|cov9.68_1617102	armHet	3CEN	3CEN	non-TE non-Satellite
nw>contig35384|size202|read43|cov10.22_767139	armHet	3CEN	3CEN	non-TE non-Satellite
nw>contig35448|size103|read18|cov8.25_87150	armHet	3CEN	3CEN	non-TE non-Satellite
nw>contig3566|size153|read40|cov11.84_247188	armHet	3CEN	3CEN	non-TE non-Satellite
nw>contig35684|size113|read26|cov10.39_327190	armHet	3CEN	3CEN	non-TE non-Satellite
nw>contig35724|size148|read24|cov8.13_37196	armHet	3CEN	3CEN	non-TE non-Satellite
nw>contig35781|size224|read43|cov8.56_197208	armHet	3CEN	3CEN	non-TE non-Satellite
nw>contig37196|size223|read46|cov9.69_1617439	armHet	3CEN	3CEN	non-TE non-Satellite
nw>contig3723|size403|read153|cov18.12_3327449	armHet	3CEN	3CEN	non-TE non-Satellite
nw>contig37594|size353|read83|cov11.18_2477500	armHet	3CEN	3CEN	non-TE non-Satellite
nw>contig37719|size158|read29|cov9.05_247518	armHet	3CEN	3CEN	non-TE non-Satellite
nw>contig38070|size276|read51|cov8.95_17577	armHet	3CEN	3CEN	non-TE non-Satellite
nw>contig3824|size344|read164|cov21.88_777610	armHet	3CEN	3CEN	non-TE non-Satellite
nw>contig38881|size84|read15|cov8.58_37704	armHet	3CEN	3CEN	non-TE non-Satellite
nw>contig38939|size77|read13|cov8.06_37712	armHet	3CEN	3CEN	non-TE non-Satellite
nw>contig38940|size108|read20|cov8.74_287714	armHet	3CEN	3CEN	non-TE non-Satellite
nw>contig39035|size171|read31|cov8.35_367730	armHet	3CEN	3CEN	non-TE non-Satellite
nw>contig3913|size401|read119|cov14.39_2487749	armHet	3CEN	3CEN	non-TE non-Satellite
nw>contig3956|size257|read56|cov10.26_1907812	armHet	3CEN	3CEN	non-TE non-Satellite
nw>contig39890|size170|read36|cov10.11_317854	armHet	3CEN	3CEN	non-TE non-Satellite
nw>contig40278|size149|read30|cov9.64_857911	armHet	3CEN	3CEN	non-TE non-Satellite
nw>contig40892|size143|read29|cov10.08_527974	armHet	3CEN	3CEN	non-TE non-Satellite
nw>contig41081|size245|read47|cov9.30_1677996	armHet	3CEN	3CEN	non-TE non-Satellite
nw>contig41558|size244|read51|cov9.88_968042	armHet	3CEN	3CEN	non-TE non-Satellite
nw>contig4234|size510|read240|cov21.30_1398130	armHet	3CEN	3CEN	non-TE non-Satellite
nw>contig42522|size113|read23|cov9.93_398147	armHet	3CEN	3CEN	non-TE non-Satellite
nw>contig43243|size121|read20|cov8.21_298209	armHet	3CEN	3CEN	non-TE non-Satellite
nw>contig43381|size114|read22|cov9.11_28222	armHet	3CEN	3CEN	non-TE non-Satellite
nw>contig4355|size287|read87|cov14.30_218246	armHet	3CEN	3CEN	non-TE non-Satellite
nw>contig4360|size355|read129|cov17.64_2948253	armHet	3CEN	3CEN	non-TE non-Satellite
nw>contig45047|size175|read30|cov8.06_578357	armHet	3CEN	3CEN	non-TE non-Satellite
nw>contig4719|size464|read118|cov12.24_258540	armHet	3CEN	3CEN	non-TE non-Satellite
nw>contig4851|size569|read219|cov18.60_1428660	armHet	3CEN	3CEN	non-TE non-Satellite
nw>contig4884|size269|read71|cov12.51_218689	armHet	3CEN	3CEN	non-TE non-Satellite
nw>contig48889|size111|read22|cov10.04_468692	armHet	3CEN	3CEN	non-TE non-Satellite
nw>contig4914|size445|read142|cov15.03_3778716	armHet	3CEN	3CEN	non-TE non-Satellite
nw>contig4947|size450|read153|cov15.96_3128742	armHet	3CEN	3CEN	non-TE non-Satellite
nw>contig51688|size214|read42|cov9.17_388937	armHet	3CEN	3CEN	non-TE non-Satellite
nw>contig51870|size129|read22|cov8.17_28954	armHet	3CEN	3CEN	non-TE non-Satellite
nw>contig5294|size197|read76|cov18.39_379041	armHet	3CEN	3CEN	non-TE non-Satellite
nw>contig53043|size201|read35|cov8.04_719052	armHet	3CEN	3CEN	non-TE non-Satellite
nw>contig5366|size220|read57|cov12.05_1609101	armHet	3CEN	3CEN	non-TE non-Satellite
nw>contig5485|size353|read138|cov18.51_2419191	armHet	3CEN	3CEN	non-TE non-Satellite
nw>contig5595|size202|read49|cov11.58_1259287	armHet	3CEN	3CEN	non-TE non-Satellite
nw>contig56119|size225|read45|cov9.10_539301	armHet	3CEN	3CEN	non-TE non-Satellite
nw>contig56926|size79|read15|cov9.35_189365	armHet	3CEN	3CEN	non-TE non-Satellite
nw>contig58850|size108|read21|cov9.50_339497	armHet	3CEN	3CEN	non-TE non-Satellite
nw>contig5896|size505|read114|cov10.78_809507	armHet	3CEN	3CEN	non-TE non-Satellite
nw>contig59276|size92|read16|cov8.32_329529	armHet	3CEN	3CEN	non-TE non-Satellite
nw>contig5928|size71|read13|cov8.35_89531	armHet	3CEN	3CEN	non-TE non-Satellite
nw>contig59288|size96|read18|cov8.36_59530	armHet	3CEN	3CEN	non-TE non-Satellite
nw>contig59990|size158|read38|cov11.39_599586	armHet	3CEN	3CEN	non-TE non-Satellite
nw>contig6035|size170|read52|cov14.94_159611	armHet	3CEN	3CEN	non-TE non-Satellite
nw>contig62940|size101|read16|cov8.05_419775	armHet	3CEN	3CEN	non-TE non-Satellite
nw>contig6567|size71|read25|cov17.01_79952	armHet	3CEN	3CEN	non-TE non-Satellite
nw>contig66194|size80|read14|cov8.18_209991	armHet	3CEN	3CEN	non-TE non-Satellite
nw>contig6869|size266|read54|cov9.90_610171	armHet	3CEN	3CEN	non-TE non-Satellite
nw>contig6870|size286|read102|cov16.20_21610173	armHet	3CEN	3CEN	non-TE non-Satellite
nw>contig6878|size588|read244|cov19.53_49410177	armHet	3CEN	3CEN	non-TE non-Satellite
nw>contig69553|size121|read21|cov8.18_2410228	armHet	3CEN	3CEN	non-TE non-Satellite
nw>contig6966|size96|read19|cov8.97_110236	armHet	3CEN	3CEN	non-TE non-Satellite
nw>contig71001|size88|read15|cov8.26_110324	armHet	3CEN	3CEN	non-TE non-Satellite
nw>contig7139|size173|read34|cov9.32_8710344	armHet	3CEN	3CEN	non-TE non-Satellite
nw>contig7140|size351|read67|cov8.88_9110346	armHet	3CEN	3CEN	non-TE non-Satellite
nw>contig7162|size225|read67|cov14.09_14410360	armHet	3CEN	3CEN	non-TE non-Satellite
nw>contig7248|size564|read326|cov26.80_42910416	armHet	3CEN	3CEN	non-TE non-Satellite
nw>contig7249|size393|read75|cov8.89_6510417	armHet	3CEN	3CEN	non-TE non-Satellite
nw>contig7295|size91|read20|cov10.93_2510450	armHet	3CEN	3CEN	non-TE non-Satellite
nw>contig7315|size105|read21|cov8.87_010463	armHet	3CEN	3CEN	non-TE non-Satellite
nw>contig7424|size458|read127|cov13.39_35910529	armHet	3CEN	3CEN	non-TE non-Satellite
nw>contig7429|size306|read79|cov12.63_24610533	armHet	3CEN	3CEN	non-TE non-Satellite
nw>contig7439|size261|read104|cov19.14_2010540	armHet	3CEN	3CEN	non-TE non-Satellite
nw>contig7504|size99|read32|cov15.01_310577	armHet	3CEN	3CEN	non-TE non-Satellite
nw>contig7505|size539|read106|cov9.39_29310578	armHet	3CEN	3CEN	non-TE non-Satellite
nw>contig7667|size139|read44|cov13.10_6010676	armHet	3CEN	3CEN	non-TE non-Satellite
nw>contig7752|size183|read56|cov14.86_010728	armHet	3CEN	3CEN	non-TE non-Satellite
nw>contig7813|size452|read125|cov13.11_15610761	armHet	3CEN	3CEN	non-TE non-Satellite
nw>contig7938|size121|read39|cov15.74_4810834	armHet	3CEN	3CEN	non-TE non-Satellite
nw>contig7953|size166|read44|cov12.73_1810845	armHet	3CEN	3CEN	non-TE non-Satellite
nw>contig8036|size615|read131|cov10.09_32010893	armHet	3CEN	3CEN	non-TE non-Satellite
nw>contig8183|size496|read209|cov19.86_42810973	armHet	3CEN	3CEN	non-TE non-Satellite
nw>contig81950|size92|read16|cov8.05_3210982	armHet	3CEN	3CEN	non-TE non-Satellite
nw>contig8388|size471|read119|cov11.72_2911096	armHet	3CEN	3CEN	non-TE non-Satellite
nw>contig8570|size252|read43|cov8.50_1311201	armHet	3CEN	3CEN	non-TE non-Satellite
nw>contig8653|size206|read69|cov14.39_3511240	armHet	3CEN	3CEN	non-TE non-Satellite
nw>contig8710|size168|read49|cov13.72_611268	armHet	3CEN	3CEN	non-TE non-Satellite
nw>contig8729|size114|read27|cov11.65_1311278	armHet	3CEN	3CEN	non-TE non-Satellite
nw>contig8925|size275|read56|cov9.88_7011378	armHet	3CEN	3CEN	non-TE non-Satellite
nw>contig8937|size84|read18|cov9.73_1211385	armHet	3CEN	3CEN	non-TE non-Satellite
nw>contig8942|size259|read57|cov10.72_1211388	armHet	3CEN	3CEN	non-TE non-Satellite
nw>contig8956|size88|read19|cov9.28_011390	armHet	3CEN	3CEN	non-TE non-Satellite
nw>contig9046|size113|read21|cov9.00_4411442	armHet	3CEN	3CEN	non-TE non-Satellite
nw>contig9068|size886|read271|cov14.39_43911454	armHet	3CEN	3CEN	non-TE non-Satellite
nw>contig9122|size116|read23|cov9.29_211484	armHet	3CEN	3CEN	non-TE non-Satellite
nw>contig9362|size244|read84|cov16.28_11511609	armHet	3CEN	3CEN	non-TE non-Satellite
nw>contig9650|size327|read98|cov14.03_4811765	armHet	3CEN	3CEN	non-TE non-Satellite
nw>contig9655|size142|read27|cov8.80_3611768	armHet	3CEN	3CEN	non-TE non-Satellite
nw>contig9797|size234|read120|cov23.95_711832	armHet	3CEN	3CEN	non-TE non-Satellite
nw>contig9805|size432|read74|cov8.22_3811836	armHet	3CEN	3CEN	non-TE non-Satellite
nw>contig9892|size166|read42|cov11.97_10611883	armHet	3CEN	3CEN	non-TE non-Satellite
nw>contig9929|size801|read281|cov16.33_60111900	armHet	3CEN	3CEN	non-TE non-Satellite
R10956|siz12	armHet	3CEN	3CEN	non-TE non-Satellite
R11281|siz16	armHet	3CEN	3CEN	non-TE non-Satellite
R12031|siz22	armHet	3CEN	3CEN	non-TE non-Satellite
R13043|siz29	armHet	3CEN	3CEN	non-TE non-Satellite
R25062|siz78	armHet	3CEN	3CEN	non-TE non-Satellite
R29330|siz93	armHet	3CEN	3CEN	non-TE non-Satellite
R4441|size131	armHet	3CEN	3CEN	non-TE non-Satellite
R6020|size162	armHet	3CEN	3CEN	non-TE non-Satellite
R9785|size193	armHet	3CEN	3CEN	non-TE non-Satellite
ru>contig10956|size105|read22|cov10.28_2712	armHet	3CEN	3CEN	non-TE non-Satellite
ru>contig13043|size197|read37|cov9.06_12229	armHet	3CEN	3CEN	non-TE non-Satellite
ru>contig25062|size260|read61|cov10.42_19078	armHet	3CEN	3CEN	non-TE non-Satellite
ru>contig29602|size153|read30|cov8.80_9295	armHet	3CEN	3CEN	non-TE non-Satellite
ru>contig4441|size107|read33|cov14.43_37131	armHet	3CEN	3CEN	non-TE non-Satellite
ru>contig6020|size390|read254|cov30.58_298162	armHet	3CEN	3CEN	non-TE non-Satellite
ru>contig6659|size569|read170|cov13.91_459170	armHet	3CEN	3CEN	non-TE non-Satellite
ru>contig9785|size463|read134|cov13.79_269193	armHet	3CEN	3CEN	non-TE non-Satellite
nw>contig11198|size91|read28|cov14.65_24578	armHet	3CEN	3CEN	Satellite	359bp
nw>contig25108|size104|read19|cov8.57_85082	armHet	3CEN	3CEN	Satellite	CCAGTACGGGA
nw>contig10026|size107|read22|cov10.23_2916	armHet	3CEN	3CEN	TE	baggins
nw>contig10030|size85|read20|cov11.58_2518	armHet	3CEN	3CEN	TE	Doc3
nw>contig10143|size128|read44|cov15.78_5271	armHet	3CEN	3CEN	TE	gypsy12
nw>contig1028|size153|read173|cov52.49_79149	armHet	3CEN	3CEN	TE	Rt1b
nw>contig10421|size200|read36|cov8.29_67213	armHet	3CEN	3CEN	TE	Doc4
nw>contig10500|size194|read63|cov15.47_89256	armHet	3CEN	3CEN	TE	gypsy4
nw>contig10528|size119|read98|cov30.18_3642	armHet	3CEN	3CEN	TE	Cr1a
nw>contig10556|size127|read41|cov12.98_0281	armHet	3CEN	3CEN	TE	Cr1a
nw>contig10609|size214|read44|cov9.61_70312	armHet	3CEN	3CEN	TE	gypsy8
nw>contig10712|size107|read19|cov8.31_3358	armHet	3CEN	3CEN	TE	copia
nw>contig10713|size97|read71|cov27.01_1955	armHet	3CEN	3CEN	TE	Stalker4
nw>contig10946|size195|read56|cov13.52_125467	armHet	3CEN	3CEN	TE	gypsy5
nw>contig11097|size225|read59|cov12.19_58530	armHet	3CEN	3CEN	TE	gypsy8
nw>contig11232|size73|read20|cov13.58_12597	armHet	3CEN	3CEN	TE	G4
nw>contig11441|size76|read13|cov8.43_16718	armHet	3CEN	3CEN	TE	Cr1a
nw>contig11454|size89|read16|cov9.12_25728	armHet	3CEN	3CEN	TE	INE-1
nw>contig11470|size133|read25|cov9.21_2735	armHet	3CEN	3CEN	TE	gypsy8
nw>contig11526|size160|read31|cov8.70_84765	armHet	3CEN	3CEN	TE	springer
nw>contig11600|size87|read81|cov34.68_5132	armHet	3CEN	3CEN	TE	Cr1a
nw>contig11862|size155|read49|cov14.32_74899	armHet	3CEN	3CEN	TE	Doc3
nw>contig12007|size82|read16|cov9.04_0943	armHet	3CEN	3CEN	TE	Doc3-element
nw>contig1237|size164|read112|cov32.56_971081	armHet	3CEN	3CEN	TE	Cr1a
nw>contig12512|size100|read25|cov12.04_191123	armHet	3CEN	3CEN	TE	springer
nw>contig12526|size92|read96|cov37.60_0209	armHet	3CEN	3CEN	TE	Porto1
nw>contig12669|size321|read98|cov14.22_11187	armHet	3CEN	3CEN	TE	Rt1b
nw>contig12867|size104|read71|cov25.42_6236	armHet	3CEN	3CEN	TE	Cr1a
nw>contig12886|size77|read17|cov10.27_91259	armHet	3CEN	3CEN	TE	G3
nw>contig13015|size100|read18|cov8.03_121304	armHet	3CEN	3CEN	TE	Doc3
nw>contig13049|size76|read14|cov8.46_11318	armHet	3CEN	3CEN	TE	G3
nw>contig13121|size90|read24|cov12.59_31346	armHet	3CEN	3CEN	TE	Idefix
nw>contig13218|size93|read15|cov8.23_71381	armHet	3CEN	3CEN	TE	HMS-Beagle
nw>contig13312|size124|read21|cov8.30_01416	armHet	3CEN	3CEN	TE	Doc3
nw>contig13333|size101|read18|cov8.48_71426	armHet	3CEN	3CEN	TE	Doc3
nw>contig13538|size217|read41|cov8.92_871511	armHet	3CEN	3CEN	TE	Doc4
nw>contig13542|size265|read70|cov11.53_251513	armHet	3CEN	3CEN	TE	jockey
nw>contig13699|size178|read96|cov23.72_91565	armHet	3CEN	3CEN	TE	gypsy8
nw>contig13827|size104|read24|cov10.81_61611	armHet	3CEN	3CEN	TE	Cr1a
nw>contig13858|size158|read114|cov27.03_53311	armHet	3CEN	3CEN	TE	Doc3
nw>contig14334|size167|read35|cov9.47_161791	armHet	3CEN	3CEN	TE	G5A
nw>contig14336|size221|read49|cov10.50_51792	armHet	3CEN	3CEN	TE	gypsy8
nw>contig14355|size155|read26|cov8.37_121801	armHet	3CEN	3CEN	TE	FB
nw>contig14537|size96|read19|cov9.74_01867	armHet	3CEN	3CEN	TE	invader1
nw>contig14545|size147|read43|cov13.64_161871	armHet	3CEN	3CEN	TE	Rt1b
nw>contig14597|size242|read53|cov10.67_231888	armHet	3CEN	3CEN	TE	G5A
nw>contig14789|size158|read31|cov9.35_31955	armHet	3CEN	3CEN	TE	gypsy
nw>contig14832|size102|read78|cov26.89_25373	armHet	3CEN	3CEN	TE	Cr1a
nw>contig14864|size122|read25|cov9.65_411980	armHet	3CEN	3CEN	TE	HMS-Beagle
nw>contig14892|size99|read22|cov9.93_351997	armHet	3CEN	3CEN	TE	1360
nw>contig14971|size298|read79|cov12.64_132026	armHet	3CEN	3CEN	TE	gypsy8
nw>contig15015|size188|read92|cov22.17_372041	armHet	3CEN	3CEN	TE	BS3
nw>contig15187|size78|read13|cov8.26_22106	armHet	3CEN	3CEN	TE	mdg1
nw>contig15345|size148|read97|cov25.49_75406	armHet	3CEN	3CEN	TE	Cr1a
nw>contig15454|size123|read25|cov10.00_212207	armHet	3CEN	3CEN	TE	invader2
nw>contig15833|size92|read16|cov8.03_302352	armHet	3CEN	3CEN	TE	accord2
nw>contig15929|size194|read37|cov8.92_122387	armHet	3CEN	3CEN	TE	gypsy2
nw>contig16167|size230|read50|cov10.37_1532471	armHet	3CEN	3CEN	TE	gypsy2
nw>contig16240|size439|read76|cov8.06_2082501	armHet	3CEN	3CEN	TE	gypsy2
nw>contig16242|size171|read48|cov12.82_982502	armHet	3CEN	3CEN	TE	gypsy12
nw>contig16344|size157|read27|cov8.47_302535	armHet	3CEN	3CEN	TE	Porto1
nw>contig16363|size213|read45|cov9.60_102542	armHet	3CEN	3CEN	TE	gypsy4
nw>contig16688|size339|read112|cov15.16_1842636	armHet	3CEN	3CEN	TE	G3
nw>contig16716|size262|read51|cov9.20_672647	armHet	3CEN	3CEN	TE	invader2
nw>contig16761|size110|read41|cov14.76_162660	armHet	3CEN	3CEN	TE	I
nw>contig16931|size131|read35|cov12.40_12734	armHet	3CEN	3CEN	TE	accord2
nw>contig17045|size142|read56|cov18.24_582776	armHet	3CEN	3CEN	TE	Doc3
nw>contig17062|size600|read142|cov11.36_5362781	armHet	3CEN	3CEN	TE	INE-1
nw>contig17136|size170|read32|cov9.09_222804	armHet	3CEN	3CEN	TE	Quasimodo
nw>contig17243|size91|read21|cov11.38_192837	armHet	3CEN	3CEN	TE	Idefix
nw>contig17874|size71|read41|cov20.37_11552	armHet	3CEN	3CEN	TE	Doc3-element
nw>contig17887|size104|read18|cov8.21_53054	armHet	3CEN	3CEN	TE	gypsy8
nw>contig17991|size367|read82|cov10.46_2823085	armHet	3CEN	3CEN	TE	invader2
nw>contig18765|size184|read40|cov10.13_303342	armHet	3CEN	3CEN	TE	Doc3
nw>contig18905|size138|read40|cov13.18_93376	armHet	3CEN	3CEN	TE	gypsy
nw>contig19139|size115|read25|cov10.57_403448	armHet	3CEN	3CEN	TE	gypsy4
nw>contig19154|size159|read40|cov11.65_373454	armHet	3CEN	3CEN	TE	F
nw>contig19211|size99|read20|cov9.31_33472	armHet	3CEN	3CEN	TE	Ivk
nw>contig19308|size316|read110|cov16.39_173501	armHet	3CEN	3CEN	TE	Doc3
nw>contig19911|size172|read74|cov18.81_1083692	armHet	3CEN	3CEN	TE	Idefix
nw>contig19992|size144|read30|cov9.72_303709	armHet	3CEN	3CEN	TE	Doc3
nw>contig20122|size269|read46|cov8.33_1283750	armHet	3CEN	3CEN	TE	jockey2
nw>contig20352|size152|read29|cov9.32_203814	armHet	3CEN	3CEN	TE	Cr1a
nw>contig20672|size92|read25|cov11.49_323909	armHet	3CEN	3CEN	TE	HMS-Beagle2
nw>contig20732|size82|read15|cov9.21_213924	armHet	3CEN	3CEN	TE	G5
nw>contig2080|size223|read99|cov21.46_1283951	armHet	3CEN	3CEN	TE	S
nw>contig2100|size149|read30|cov9.86_634013	armHet	3CEN	3CEN	TE	Idefix
nw>contig21012|size91|read16|cov8.37_144014	armHet	3CEN	3CEN	TE	Cr1a
nw>contig21113|size106|read22|cov9.57_214043	armHet	3CEN	3CEN	TE	Quasimodo
nw>contig21245|size222|read52|cov10.61_14076	armHet	3CEN	3CEN	TE	G5A
nw>contig21271|size95|read20|cov9.66_84081	armHet	3CEN	3CEN	TE	Stalker4
nw>contig21397|size115|read66|cov21.06_28717	armHet	3CEN	3CEN	TE	Cr1a
nw>contig21779|size255|read51|cov9.06_64213	armHet	3CEN	3CEN	TE	gypsy8
nw>contig21787|size77|read63|cov28.56_17741	armHet	3CEN	3CEN	TE	Doc3
nw>contig22032|size98|read80|cov29.01_31747	armHet	3CEN	3CEN	TE	Cr1a
nw>contig22235|size247|read55|cov10.49_244335	armHet	3CEN	3CEN	TE	G5A
nw>contig22276|size168|read29|cov8.06_434346	armHet	3CEN	3CEN	TE	Porto1
nw>contig23327|size173|read35|cov9.36_1074636	armHet	3CEN	3CEN	TE	Doc4
nw>contig23425|size85|read15|cov8.74_54665	armHet	3CEN	3CEN	TE	Cr1a
nw>contig23490|size163|read46|cov13.63_1024684	armHet	3CEN	3CEN	TE	X
nw>contig23504|size75|read18|cov9.13_134691	armHet	3CEN	3CEN	TE	S
nw>contig23794|size153|read33|cov10.14_454761	armHet	3CEN	3CEN	TE	INE-1
nw>contig23987|size102|read25|cov11.25_334810	armHet	3CEN	3CEN	TE	Ivk
nw>contig23988|size73|read12|cov8.34_74811	armHet	3CEN	3CEN	TE	Doc3
nw>contig24095|size147|read26|cov8.90_354837	armHet	3CEN	3CEN	TE	BS
nw>contig24379|size88|read61|cov23.17_28814	armHet	3CEN	3CEN	TE	Cr1a
nw>contig24533|size79|read22|cov13.23_194941	armHet	3CEN	3CEN	TE	gypsy8
nw>contig25256|size199|read49|cov11.84_675114	armHet	3CEN	3CEN	TE	INE-1
nw>contig25828|size250|read65|cov12.14_1475258	armHet	3CEN	3CEN	TE	aurora
nw>contig26011|size77|read20|cov11.53_15300	armHet	3CEN	3CEN	TE	gypsy4
nw>contig26481|size107|read20|cov9.15_05425	armHet	3CEN	3CEN	TE	gypsy
nw>contig26696|size81|read14|cov8.43_15468	armHet	3CEN	3CEN	TE	HMS-Beagle
nw>contig26729|size150|read29|cov9.18_285478	armHet	3CEN	3CEN	TE	Doc3
nw>contig26821|size379|read89|cov11.05_1135503	armHet	3CEN	3CEN	TE	invader4
nw>contig27318|size99|read19|cov9.52_155608	armHet	3CEN	3CEN	TE	Doc3
nw>contig27507|size114|read20|cov8.28_265647	armHet	3CEN	3CEN	TE	gypsy9
nw>contig27639|size131|read24|cov8.79_85677	armHet	3CEN	3CEN	TE	gtwin
nw>contig27701|size159|read31|cov9.56_585691	armHet	3CEN	3CEN	TE	gypsy
nw>contig27775|size93|read52|cov20.40_9910	armHet	3CEN	3CEN	TE	gypsy4
nw>contig27822|size99|read20|cov9.22_195712	armHet	3CEN	3CEN	TE	G3
nw>contig28197|size108|read22|cov9.98_365787	armHet	3CEN	3CEN	TE	invader1
nw>contig28322|size82|read22|cov12.96_225814	armHet	3CEN	3CEN	TE	gypsy12
nw>contig28494|size103|read18|cov8.38_205850	armHet	3CEN	3CEN	TE	gypsy8
nw>contig28822|size167|read30|cov8.52_335927	armHet	3CEN	3CEN	TE	gypsy8
nw>contig28852|size161|read37|cov11.05_245934	armHet	3CEN	3CEN	TE	gypsy
nw>contig28925|size109|read19|cov8.32_125951	armHet	3CEN	3CEN	TE	G3
nw>contig28942|size172|read32|cov9.33_355954	armHet	3CEN	3CEN	TE	Rt1b
nw>contig29353|size80|read13|cov8.14_196031	armHet	3CEN	3CEN	TE	invader6
nw>contig29488|size103|read20|cov8.99_436054	armHet	3CEN	3CEN	TE	Idefix
nw>contig29567|size108|read21|cov9.04_06076	armHet	3CEN	3CEN	TE	G3
nw>contig29803|size138|read30|cov10.46_176124	armHet	3CEN	3CEN	TE	BS
nw>contig3024|size214|read42|cov9.54_1096211	armHet	3CEN	3CEN	TE	1360
nw>contig30760|size117|read28|cov11.21_126324	armHet	3CEN	3CEN	TE	G3
nw>contig30892|size97|read32|cov13.72_326352	armHet	3CEN	3CEN	TE	X
nw>contig31002|size99|read23|cov11.00_366372	armHet	3CEN	3CEN	TE	gypsy
nw>contig31216|size109|read39|cov16.44_496422	armHet	3CEN	3CEN	TE	G5A
nw>contig32179|size115|read24|cov9.62_76589	armHet	3CEN	3CEN	TE	gypsy
nw>contig3250|size224|read127|cov27.46_1076658	armHet	3CEN	3CEN	TE	G3
nw>contig32923|size89|read17|cov8.25_196738	armHet	3CEN	3CEN	TE	Doc3
nw>contig33308|size192|read42|cov10.29_306804	armHet	3CEN	3CEN	TE	gypsy
nw>contig33360|size93|read18|cov9.67_16814	armHet	3CEN	3CEN	TE	gypsy8
nw>contig33373|size76|read19|cov11.24_116819	armHet	3CEN	3CEN	TE	Doc3
nw>contig33629|size272|read71|cov12.09_36862	armHet	3CEN	3CEN	TE	gypsy8
nw>contig33950|size214|read50|cov10.71_356908	armHet	3CEN	3CEN	TE	Rt1a
nw>contig33968|size150|read26|cov8.41_516912	armHet	3CEN	3CEN	TE	G
nw>contig34324|size90|read17|cov8.38_06973	armHet	3CEN	3CEN	TE	gypsy
nw>contig34498|size101|read21|cov9.64_227003	armHet	3CEN	3CEN	TE	gypsy8
nw>contig34853|size89|read31|cov16.15_297058	armHet	3CEN	3CEN	TE	Cr1a
nw>contig35057|size114|read28|cov12.32_397095	armHet	3CEN	3CEN	TE	gypsy8
nw>contig35267|size256|read199|cov29.41_931046	armHet	3CEN	3CEN	TE	Cr1a
nw>contig35513|size116|read24|cov10.40_197167	armHet	3CEN	3CEN	TE	I
nw>contig35550|size90|read24|cov12.08_137176	armHet	3CEN	3CEN	TE	gypsy8
nw>contig35765|size104|read23|cov9.65_137204	armHet	3CEN	3CEN	TE	Cr1a
nw>contig35808|size110|read24|cov10.05_67218	armHet	3CEN	3CEN	TE	Cr1a
nw>contig35904|size105|read20|cov9.38_457235	armHet	3CEN	3CEN	TE	G5A
nw>contig3615|size181|read90|cov24.07_1207275	armHet	3CEN	3CEN	TE	S
nw>contig3626|size125|read118|cov34.97_61064	armHet	3CEN	3CEN	TE	Doc3-element
nw>contig36342|size138|read82|cov21.92_261066	armHet	3CEN	3CEN	TE	Cr1a
nw>contig3654|size131|read39|cov14.14_597332	armHet	3CEN	3CEN	TE	Cr1a
nw>contig3661|size130|read43|cov15.82_107340	armHet	3CEN	3CEN	TE	HMS-Beagle2
nw>contig37234|size73|read12|cov8.08_07448	armHet	3CEN	3CEN	TE	Doc3
nw>contig38540|size171|read38|cov11.11_467653	armHet	3CEN	3CEN	TE	Fw2
nw>contig38543|size104|read30|cov12.59_337654	armHet	3CEN	3CEN	TE	F
nw>contig38612|size114|read20|cov8.47_537665	armHet	3CEN	3CEN	TE	S2
nw>contig38778|size92|read16|cov8.41_257690	armHet	3CEN	3CEN	TE	gypsy
nw>contig39159|size106|read20|cov8.70_297752	armHet	3CEN	3CEN	TE	Cr1a
nw>contig39526|size150|read25|cov8.47_67808	armHet	3CEN	3CEN	TE	INE-1
nw>contig40035|size133|read26|cov9.28_737882	armHet	3CEN	3CEN	TE	Quasimodo
nw>contig42800|size101|read23|cov9.83_318173	armHet	3CEN	3CEN	TE	Porto1
nw>contig43398|size95|read27|cov13.58_238224	armHet	3CEN	3CEN	TE	gypsy4
nw>contig43548|size97|read20|cov9.84_38244	armHet	3CEN	3CEN	TE	diver2
nw>contig4389|size180|read73|cov19.26_1038272	armHet	3CEN	3CEN	TE	X
nw>contig4562|size97|read38|cov17.06_128401	armHet	3CEN	3CEN	TE	gypsy9
nw>contig4717|size159|read35|cov10.69_648539	armHet	3CEN	3CEN	TE	Porto1
nw>contig4730|size350|read188|cov26.02_1038557	armHet	3CEN	3CEN	TE	invader2
nw>contig47545|size164|read37|cov10.34_68575	armHet	3CEN	3CEN	TE	Cr1a
nw>contig48007|size90|read15|cov8.19_18619	armHet	3CEN	3CEN	TE	gypsy8
nw>contig4824|size147|read56|cov18.65_228636	armHet	3CEN	3CEN	TE	Idefix
nw>contig4953|size795|read298|cov17.71_5048748	armHet	3CEN	3CEN	TE	gtwin
nw>contig50214|size93|read22|cov9.42_68809	armHet	3CEN	3CEN	TE	H
nw>contig50761|size112|read67|cov21.63_181233	armHet	3CEN	3CEN	TE	Idefix
nw>contig51069|size93|read17|cov8.51_48877	armHet	3CEN	3CEN	TE	gypsy8
nw>contig51079|size145|read26|cov8.15_638879	armHet	3CEN	3CEN	TE	X
nw>contig5139|size146|read31|cov10.71_658907	armHet	3CEN	3CEN	TE	DM88
nw>contig5436|size521|read166|cov15.24_2429156	armHet	3CEN	3CEN	TE	Cr1a
nw>contig5511|size213|read46|cov9.06_929217	armHet	3CEN	3CEN	TE	Doc3
nw>contig5661|size112|read35|cov13.95_59341	armHet	3CEN	3CEN	TE	Porto1
nw>contig57341|size185|read35|cov8.24_239402	armHet	3CEN	3CEN	TE	Rt1b
nw>contig58824|size76|read14|cov8.12_69492	armHet	3CEN	3CEN	TE	Doc3
nw>contig5930|size137|read108|cov28.04_361320	armHet	3CEN	3CEN	TE	Cr1a
nw>contig59651|size118|read24|cov8.74_359562	armHet	3CEN	3CEN	TE	INE-1
nw>contig6322|size88|read29|cov15.44_259799	armHet	3CEN	3CEN	TE	G3
nw>contig6381|size130|read25|cov8.62_39837	armHet	3CEN	3CEN	TE	Quasimodo
nw>contig64832|size73|read13|cov8.68_39901	armHet	3CEN	3CEN	TE	Cr1a
nw>contig6499|size118|read25|cov9.86_19913	armHet	3CEN	3CEN	TE	accord2
nw>contig6515|size86|read51|cov22.55_261372	armHet	3CEN	3CEN	TE	Doc3-element
nw>contig65230|size159|read30|cov8.89_829930	armHet	3CEN	3CEN	TE	Porto1
nw>contig6545|size186|read52|cov12.40_1259942	armHet	3CEN	3CEN	TE	Porto1
nw>contig6598|size92|read27|cov13.23_99980	armHet	3CEN	3CEN	TE	Doc3
nw>contig66210|size83|read14|cov8.08_09994	armHet	3CEN	3CEN	TE	Doc3
nw>contig6704|size286|read51|cov8.21_9310052	armHet	3CEN	3CEN	TE	Rt1a
nw>contig68455|size92|read17|cov8.07_1110157	armHet	3CEN	3CEN	TE	springer
nw>contig6946|size119|read20|cov8.39_4410224	armHet	3CEN	3CEN	TE	gypsy4
nw>contig7060|size136|read60|cov21.39_3010301	armHet	3CEN	3CEN	TE	Doc3
nw>contig7157|size149|read25|cov8.20_3810356	armHet	3CEN	3CEN	TE	Rt1b
nw>contig73301|size70|read15|cov8.13_410474	armHet	3CEN	3CEN	TE	INE-1
nw>contig7394|size118|read26|cov9.58_4110509	armHet	3CEN	3CEN	TE	Max
nw>contig7428|size70|read49|cov24.29_01453	armHet	3CEN	3CEN	TE	S
nw>contig7444|size112|read68|cov22.03_271455	armHet	3CEN	3CEN	TE	Cr1a
nw>contig7548|size86|read68|cov29.22_71470	armHet	3CEN	3CEN	TE	invader1
nw>contig7561|size83|read18|cov9.34_410615	armHet	3CEN	3CEN	TE	gypsy12
nw>contig7723|size89|read66|cov25.53_291493	armHet	3CEN	3CEN	TE	Cr1a
nw>contig7886|size92|read19|cov10.26_2710804	armHet	3CEN	3CEN	TE	gypsy4
nw>contig7902|size199|read46|cov10.88_13410813	armHet	3CEN	3CEN	TE	Cr1a
nw>contig7924|size71|read20|cov12.80_1110825	armHet	3CEN	3CEN	TE	Porto1
nw>contig8466|size149|read33|cov10.74_5911137	armHet	3CEN	3CEN	TE	HMS-Beagle
nw>contig8474|size220|read46|cov9.91_15911140	armHet	3CEN	3CEN	TE	gypsy
nw>contig8744|size76|read15|cov9.01_911286	armHet	3CEN	3CEN	TE	gypsy
nw>contig8938|size208|read41|cov9.01_1811386	armHet	3CEN	3CEN	TE	invader3
nw>contig9031|size81|read49|cov21.98_31613	armHet	3CEN	3CEN	TE	Cr1a
nw>contig9054|size150|read29|cov9.40_6711446	armHet	3CEN	3CEN	TE	Tc3
nw>contig9322|size205|read44|cov9.80_811587	armHet	3CEN	3CEN	TE	gtwin
nw>contig9615|size81|read25|cov15.04_511751	armHet	3CEN	3CEN	TE	invader6
nw>contig9659|size72|read21|cov13.57_411769	armHet	3CEN	3CEN	TE	S
nw>contig9674|size73|read54|cov27.21_131664	armHet	3CEN	3CEN	TE	Cr1a
nw>contig9857|size307|read84|cov13.17_3411865	armHet	3CEN	3CEN	TE	Stalker2
nw>contig9936|size106|read22|cov10.22_911904	armHet	3CEN	3CEN	TE	F
nw>contig9992|size160|read38|cov10.57_7611940	armHet	3CEN	3CEN	TE	gypsy
nw>contig10097|size263|read51|cov9.40_12451	armHet	3L	3L	non-TE non-Satellite
nw>contig10157|size88|read21|cov10.18_2380	armHet	3L	3L	non-TE non-Satellite
nw>contig10220|size262|read60|cov11.15_47116	armHet	3L	3L	non-TE non-Satellite
nw>contig10236|size107|read23|cov10.50_42123	armHet	3L	3L	non-TE non-Satellite
nw>contig10253|size180|read33|cov8.47_8134	armHet	3L	3L	non-TE non-Satellite
nw>contig10279|size156|read49|cov13.67_90144	armHet	3L	3L	non-TE non-Satellite
nw>contig10358|size278|read95|cov15.88_145182	armHet	3L	3L	non-TE non-Satellite
nw>contig10503|size152|read40|cov12.33_15257	armHet	3L	3L	non-TE non-Satellite
nw>contig10587|size177|read36|cov10.00_77296	armHet	3L	3L	non-TE non-Satellite
nw>contig10714|size112|read20|cov8.71_39359	armHet	3L	3L	non-TE non-Satellite
nw>contig10985|size229|read49|cov9.68_31485	armHet	3L	3L	non-TE non-Satellite
nw>contig11033|size352|read178|cov23.80_32500	armHet	3L	3L	non-TE non-Satellite
nw>contig11043|size160|read29|cov8.63_77507	armHet	3L	3L	non-TE non-Satellite
nw>contig11073|size202|read40|cov9.22_109520	armHet	3L	3L	non-TE non-Satellite
nw>contig11076|size153|read41|cov13.08_35521	armHet	3L	3L	non-TE non-Satellite
nw>contig11102|size214|read38|cov8.31_143533	armHet	3L	3L	non-TE non-Satellite
nw>contig11209|size75|read19|cov12.19_9588	armHet	3L	3L	non-TE non-Satellite
nw>contig11295|size108|read26|cov10.81_13631	armHet	3L	3L	non-TE non-Satellite
nw>contig11394|size363|read71|cov9.06_98688	armHet	3L	3L	non-TE non-Satellite
nw>contig11414|size220|read39|cov8.58_68703	armHet	3L	3L	non-TE non-Satellite
nw>contig11427|size144|read44|cov14.43_7710	armHet	3L	3L	non-TE non-Satellite
nw>contig11554|size238|read52|cov10.59_12777	armHet	3L	3L	non-TE non-Satellite
nw>contig11581|size298|read95|cov15.27_157787	armHet	3L	3L	non-TE non-Satellite
nw>contig11713|size86|read17|cov9.31_17843	armHet	3L	3L	non-TE non-Satellite
nw>contig11746|size116|read22|cov9.25_46856	armHet	3L	3L	non-TE non-Satellite
nw>contig11950|size504|read138|cov12.87_193925	armHet	3L	3L	non-TE non-Satellite
nw>contig12218|size122|read24|cov9.66_111020	armHet	3L	3L	non-TE non-Satellite
nw>contig12311|size132|read25|cov8.68_401057	armHet	3L	3L	non-TE non-Satellite
nw>contig12337|size286|read68|cov11.53_41067	armHet	3L	3L	non-TE non-Satellite
nw>contig12405|size70|read17|cov11.16_01087	armHet	3L	3L	non-TE non-Satellite
nw>contig12476|size158|read29|cov8.68_751113	armHet	3L	3L	non-TE non-Satellite
nw>contig12526|size252|read50|cov9.75_611130	armHet	3L	3L	non-TE non-Satellite
nw>contig12599|size308|read58|cov9.12_1621153	armHet	3L	3L	non-TE non-Satellite
nw>contig12698|size244|read68|cov13.24_461197	armHet	3L	3L	non-TE non-Satellite
nw>contig12715|size329|read89|cov12.74_2511204	armHet	3L	3L	non-TE non-Satellite
nw>contig12924|size389|read92|cov11.22_2571272	armHet	3L	3L	non-TE non-Satellite
nw>contig12948|size285|read68|cov11.45_621281	armHet	3L	3L	non-TE non-Satellite
nw>contig13025|size191|read36|cov8.92_511305	armHet	3L	3L	non-TE non-Satellite
nw>contig13033|size160|read50|cov13.62_911307	armHet	3L	3L	non-TE non-Satellite
nw>contig13138|size389|read103|cov11.76_2641352	armHet	3L	3L	non-TE non-Satellite
nw>contig13188|size109|read19|cov8.79_491372	armHet	3L	3L	non-TE non-Satellite
nw>contig13193|size278|read81|cov13.52_451374	armHet	3L	3L	non-TE non-Satellite
nw>contig13221|size164|read28|cov8.41_721382	armHet	3L	3L	non-TE non-Satellite
nw>contig13290|size273|read77|cov13.25_1301405	armHet	3L	3L	non-TE non-Satellite
nw>contig13413|size193|read47|cov11.28_201460	armHet	3L	3L	non-TE non-Satellite
nw>contig13467|size228|read46|cov9.33_1291485	armHet	3L	3L	non-TE non-Satellite
nw>contig13475|size289|read57|cov9.28_661488	armHet	3L	3L	non-TE non-Satellite
nw>contig13557|size389|read98|cov12.32_1681518	armHet	3L	3L	non-TE non-Satellite
nw>contig13568|size381|read74|cov9.10_1251521	armHet	3L	3L	non-TE non-Satellite
nw>contig13639|size400|read91|cov10.38_421545	armHet	3L	3L	non-TE non-Satellite
nw>contig13784|size532|read121|cov10.76_491598	armHet	3L	3L	non-TE non-Satellite
nw>contig13811|size299|read53|cov8.44_1291606	armHet	3L	3L	non-TE non-Satellite
nw>contig13820|size124|read33|cov11.98_151609	armHet	3L	3L	non-TE non-Satellite
nw>contig13980|size161|read31|cov9.43_21663	armHet	3L	3L	non-TE non-Satellite
nw>contig14019|size303|read56|cov8.61_2081678	armHet	3L	3L	non-TE non-Satellite
nw>contig14057|size123|read77|cov24.02_26323	armHet	3L	3L	non-TE non-Satellite
nw>contig14245|size193|read35|cov8.13_331762	armHet	3L	3L	non-TE non-Satellite
nw>contig14298|size154|read29|cov8.35_381778	armHet	3L	3L	non-TE non-Satellite
nw>contig14431|size208|read42|cov9.61_431826	armHet	3L	3L	non-TE non-Satellite
nw>contig14684|size91|read16|cov8.22_11915	armHet	3L	3L	non-TE non-Satellite
nw>contig14742|size202|read49|cov10.68_341939	armHet	3L	3L	non-TE non-Satellite
nw>contig14835|size144|read86|cov21.69_55374	armHet	3L	3L	non-TE non-Satellite
nw>contig14887|size897|read291|cov15.48_6721993	armHet	3L	3L	non-TE non-Satellite
nw>contig14977|size477|read108|cov10.75_1472029	armHet	3L	3L	non-TE non-Satellite
nw>contig15098|size197|read34|cov8.18_262073	armHet	3L	3L	non-TE non-Satellite
nw>contig15109|size134|read26|cov8.64_342078	armHet	3L	3L	non-TE non-Satellite
nw>contig15349|size139|read37|cov12.76_252168	armHet	3L	3L	non-TE non-Satellite
nw>contig15379|size356|read104|cov13.83_1292181	armHet	3L	3L	non-TE non-Satellite
nw>contig15524|size251|read42|cov8.22_872231	armHet	3L	3L	non-TE non-Satellite
nw>contig15589|size142|read45|cov15.67_12258	armHet	3L	3L	non-TE non-Satellite
nw>contig15674|size204|read45|cov10.23_12295	armHet	3L	3L	non-TE non-Satellite
nw>contig15871|size174|read32|cov8.70_782367	armHet	3L	3L	non-TE non-Satellite
nw>contig16216|size139|read28|cov9.82_222491	armHet	3L	3L	non-TE non-Satellite
nw>contig16315|size264|read71|cov12.77_272527	armHet	3L	3L	non-TE non-Satellite
nw>contig16326|size383|read127|cov15.98_1452530	armHet	3L	3L	non-TE non-Satellite
nw>contig16557|size132|read23|cov8.60_512598	armHet	3L	3L	non-TE non-Satellite
nw>contig16787|size325|read70|cov10.45_802674	armHet	3L	3L	non-TE non-Satellite
nw>contig16841|size114|read36|cov15.34_462690	armHet	3L	3L	non-TE non-Satellite
nw>contig17035|size320|read67|cov9.63_2202771	armHet	3L	3L	non-TE non-Satellite
nw>contig17139|size197|read58|cov14.00_472807	armHet	3L	3L	non-TE non-Satellite
nw>contig17151|size81|read14|cov8.62_62812	armHet	3L	3L	non-TE non-Satellite
nw>contig17370|size228|read47|cov9.74_692884	armHet	3L	3L	non-TE non-Satellite
nw>contig17450|size71|read14|cov9.52_92913	armHet	3L	3L	non-TE non-Satellite
nw>contig17563|size102|read37|cov17.05_192943	armHet	3L	3L	non-TE non-Satellite
nw>contig17726|size145|read40|cov13.65_112995	armHet	3L	3L	non-TE non-Satellite
nw>contig17846|size139|read27|cov8.84_743037	armHet	3L	3L	non-TE non-Satellite
nw>contig17859|size103|read24|cov10.16_163043	armHet	3L	3L	non-TE non-Satellite
nw>contig17907|size118|read23|cov9.19_83060	armHet	3L	3L	non-TE non-Satellite
nw>contig17938|size204|read40|cov8.98_353068	armHet	3L	3L	non-TE non-Satellite
nw>contig18048|size226|read52|cov10.79_163105	armHet	3L	3L	non-TE non-Satellite
nw>contig18099|size472|read148|cov14.72_2003122	armHet	3L	3L	non-TE non-Satellite
nw>contig18216|size115|read41|cov17.01_283166	armHet	3L	3L	non-TE non-Satellite
nw>contig18243|size396|read83|cov9.68_3363181	armHet	3L	3L	non-TE non-Satellite
nw>contig18444|size284|read57|cov9.60_1793249	armHet	3L	3L	non-TE non-Satellite
nw>contig18450|size380|read81|cov9.55_1343250	armHet	3L	3L	non-TE non-Satellite
nw>contig18470|size188|read32|cov8.38_1253256	armHet	3L	3L	non-TE non-Satellite
nw>contig18807|size117|read54|cov21.31_353350	armHet	3L	3L	non-TE non-Satellite
nw>contig18889|size218|read39|cov8.26_203371	armHet	3L	3L	non-TE non-Satellite
nw>contig18927|size478|read157|cov15.07_263382	armHet	3L	3L	non-TE non-Satellite
nw>contig19078|size118|read26|cov10.53_573432	armHet	3L	3L	non-TE non-Satellite
nw>contig19155|size161|read41|cov12.07_793455	armHet	3L	3L	non-TE non-Satellite
nw>contig19188|size110|read18|cov8.13_113460	armHet	3L	3L	non-TE non-Satellite
nw>contig19701|size128|read22|cov8.00_543626	armHet	3L	3L	non-TE non-Satellite
nw>contig19745|size413|read86|cov10.00_2843641	armHet	3L	3L	non-TE non-Satellite
nw>contig19792|size265|read59|cov11.10_1163653	armHet	3L	3L	non-TE non-Satellite
nw>contig19799|size366|read62|cov8.21_2683656	armHet	3L	3L	non-TE non-Satellite
nw>contig20055|size93|read15|cov8.01_243730	armHet	3L	3L	non-TE non-Satellite
nw>contig20092|size304|read71|cov11.08_1833743	armHet	3L	3L	non-TE non-Satellite
nw>contig20110|size128|read22|cov8.65_603746	armHet	3L	3L	non-TE non-Satellite
nw>contig20117|size186|read37|cov9.75_1233748	armHet	3L	3L	non-TE non-Satellite
nw>contig20185|size340|read68|cov9.19_2383765	armHet	3L	3L	non-TE non-Satellite
nw>contig20413|size238|read77|cov15.21_03832	armHet	3L	3L	non-TE non-Satellite
nw>contig20416|size138|read30|cov9.22_533834	armHet	3L	3L	non-TE non-Satellite
nw>contig20608|size155|read40|cov11.72_03881	armHet	3L	3L	non-TE non-Satellite
nw>contig20625|size137|read24|cov8.05_73887	armHet	3L	3L	non-TE non-Satellite
nw>contig20650|size81|read14|cov8.52_03897	armHet	3L	3L	non-TE non-Satellite
nw>contig20727|size189|read37|cov8.88_1233922	armHet	3L	3L	non-TE non-Satellite
nw>contig20928|size206|read77|cov17.84_1333989	armHet	3L	3L	non-TE non-Satellite
nw>contig21250|size399|read96|cov11.24_3394077	armHet	3L	3L	non-TE non-Satellite
nw>contig21351|size182|read47|cov12.39_34100	armHet	3L	3L	non-TE non-Satellite
nw>contig21510|size209|read45|cov9.57_134144	armHet	3L	3L	non-TE non-Satellite
nw>contig21537|size301|read60|cov9.49_1864153	armHet	3L	3L	non-TE non-Satellite
nw>contig21733|size131|read26|cov9.37_324204	armHet	3L	3L	non-TE non-Satellite
nw>contig21843|size122|read25|cov9.76_574226	armHet	3L	3L	non-TE non-Satellite
nw>contig21857|size94|read19|cov9.71_214229	armHet	3L	3L	non-TE non-Satellite
nw>contig21913|size322|read72|cov10.59_84248	armHet	3L	3L	non-TE non-Satellite
nw>contig22098|size149|read25|cov8.03_304299	armHet	3L	3L	non-TE non-Satellite
nw>contig22252|size319|read97|cov13.97_174342	armHet	3L	3L	non-TE non-Satellite
nw>contig22598|size186|read45|cov11.52_1264423	armHet	3L	3L	non-TE non-Satellite
nw>contig22772|size275|read62|cov10.00_1044479	armHet	3L	3L	non-TE non-Satellite
nw>contig22786|size339|read68|cov9.42_2024482	armHet	3L	3L	non-TE non-Satellite
nw>contig23251|size234|read46|cov8.99_524615	armHet	3L	3L	non-TE non-Satellite
nw>contig23354|size256|read47|cov8.19_1194645	armHet	3L	3L	non-TE non-Satellite
nw>contig23478|size199|read50|cov9.57_1044680	armHet	3L	3L	non-TE non-Satellite
nw>contig2352|size433|read264|cov28.68_2494697	armHet	3L	3L	non-TE non-Satellite
nw>contig23579|size368|read93|cov12.07_3044708	armHet	3L	3L	non-TE non-Satellite
nw>contig23765|size250|read43|cov8.10_804755	armHet	3L	3L	non-TE non-Satellite
nw>contig23860|size168|read33|cov9.45_594774	armHet	3L	3L	non-TE non-Satellite
nw>contig23910|size137|read27|cov8.88_154784	armHet	3L	3L	non-TE non-Satellite
nw>contig23947|size158|read35|cov10.19_234800	armHet	3L	3L	non-TE non-Satellite
nw>contig23954|size88|read19|cov10.44_284801	armHet	3L	3L	non-TE non-Satellite
nw>contig23966|size91|read16|cov8.84_304802	armHet	3L	3L	non-TE non-Satellite
nw>contig24053|size255|read98|cov17.82_1734826	armHet	3L	3L	non-TE non-Satellite
nw>contig24175|size237|read46|cov9.13_834860	armHet	3L	3L	non-TE non-Satellite
nw>contig2424|size449|read497|cov50.73_2794871	armHet	3L	3L	non-TE non-Satellite
nw>contig24245|size178|read32|cov8.29_674870	armHet	3L	3L	non-TE non-Satellite
nw>contig24262|size95|read22|cov11.24_174876	armHet	3L	3L	non-TE non-Satellite
nw>contig24323|size91|read18|cov9.71_254890	armHet	3L	3L	non-TE non-Satellite
nw>contig25011|size163|read30|cov8.97_885062	armHet	3L	3L	non-TE non-Satellite
nw>contig25063|size132|read26|cov9.43_85071	armHet	3L	3L	non-TE non-Satellite
nw>contig25153|size436|read101|cov10.74_85092	armHet	3L	3L	non-TE non-Satellite
nw>contig25357|size165|read41|cov12.07_65138	armHet	3L	3L	non-TE non-Satellite
nw>contig25608|size132|read23|cov8.04_35197	armHet	3L	3L	non-TE non-Satellite
nw>contig25794|size229|read40|cov8.35_595250	armHet	3L	3L	non-TE non-Satellite
nw>contig25910|size198|read38|cov8.76_05276	armHet	3L	3L	non-TE non-Satellite
nw>contig2631|size241|read55|cov10.71_1795394	armHet	3L	3L	non-TE non-Satellite
nw>contig26317|size152|read27|cov8.55_135393	armHet	3L	3L	non-TE non-Satellite
nw>contig26397|size261|read46|cov8.04_25410	armHet	3L	3L	non-TE non-Satellite
nw>contig26632|size220|read40|cov8.66_395458	armHet	3L	3L	non-TE non-Satellite
nw>contig26809|size145|read32|cov10.02_715501	armHet	3L	3L	non-TE non-Satellite
nw>contig26823|size442|read77|cov8.33_3595505	armHet	3L	3L	non-TE non-Satellite
nw>contig26951|size261|read49|cov8.90_1215533	armHet	3L	3L	non-TE non-Satellite
nw>contig27184|size133|read29|cov10.17_725583	armHet	3L	3L	non-TE non-Satellite
nw>contig27250|size71|read18|cov11.61_05597	armHet	3L	3L	non-TE non-Satellite
nw>contig27448|size124|read22|cov8.87_645640	armHet	3L	3L	non-TE non-Satellite
nw>contig27526|size440|read87|cov9.38_05651	armHet	3L	3L	non-TE non-Satellite
nw>contig27581|size229|read55|cov11.03_765662	armHet	3L	3L	non-TE non-Satellite
nw>contig27611|size233|read46|cov9.04_675668	armHet	3L	3L	non-TE non-Satellite
nw>contig27648|size177|read41|cov11.05_335679	armHet	3L	3L	non-TE non-Satellite
nw>contig27973|size97|read17|cov8.19_235743	armHet	3L	3L	non-TE non-Satellite
nw>contig28187|size245|read44|cov8.79_155783	armHet	3L	3L	non-TE non-Satellite
nw>contig28191|size105|read20|cov8.44_415785	armHet	3L	3L	non-TE non-Satellite
nw>contig28408|size285|read49|cov8.16_765833	armHet	3L	3L	non-TE non-Satellite
nw>contig29075|size228|read48|cov9.55_335974	armHet	3L	3L	non-TE non-Satellite
nw>contig29094|size186|read47|cov11.51_245977	armHet	3L	3L	non-TE non-Satellite
nw>contig29143|size209|read37|cov8.63_675989	armHet	3L	3L	non-TE non-Satellite
nw>contig29474|size134|read23|cov8.39_246052	armHet	3L	3L	non-TE non-Satellite
nw>contig29859|size388|read67|cov8.29_1336134	armHet	3L	3L	non-TE non-Satellite
nw>contig30404|size99|read17|cov8.42_46248	armHet	3L	3L	non-TE non-Satellite
nw>contig30575|size132|read22|cov8.22_06288	armHet	3L	3L	non-TE non-Satellite
nw>contig30754|size179|read40|cov10.84_396322	armHet	3L	3L	non-TE non-Satellite
nw>contig30958|size94|read19|cov8.77_26363	armHet	3L	3L	non-TE non-Satellite
nw>contig31087|size142|read29|cov9.44_116391	armHet	3L	3L	non-TE non-Satellite
nw>contig31377|size168|read31|cov9.03_116456	armHet	3L	3L	non-TE non-Satellite
nw>contig31518|size73|read12|cov8.14_36477	armHet	3L	3L	non-TE non-Satellite
nw>contig31661|size84|read50|cov21.43_8990	armHet	3L	3L	non-TE non-Satellite
nw>contig32009|size213|read38|cov8.41_16559	armHet	3L	3L	non-TE non-Satellite
nw>contig32107|size259|read56|cov9.77_926573	armHet	3L	3L	non-TE non-Satellite
nw>contig32208|size156|read57|cov16.88_546596	armHet	3L	3L	non-TE non-Satellite
nw>contig32400|size306|read63|cov9.18_416638	armHet	3L	3L	non-TE non-Satellite
nw>contig32622|size169|read37|cov10.41_36680	armHet	3L	3L	non-TE non-Satellite
nw>contig33148|size165|read28|cov8.12_1046778	armHet	3L	3L	non-TE non-Satellite
nw>contig33458|size180|read103|cov21.98_281019	armHet	3L	3L	non-TE non-Satellite
nw>contig33566|size134|read25|cov8.30_226851	armHet	3L	3L	non-TE non-Satellite
nw>contig34043|size199|read64|cov14.81_476922	armHet	3L	3L	non-TE non-Satellite
nw>contig34190|size77|read17|cov10.04_176945	armHet	3L	3L	non-TE non-Satellite
nw>contig34605|size86|read17|cov9.60_07020	armHet	3L	3L	non-TE non-Satellite
nw>contig34845|size193|read34|cov8.59_57057	armHet	3L	3L	non-TE non-Satellite
nw>contig35283|size87|read18|cov9.77_187122	armHet	3L	3L	non-TE non-Satellite
nw>contig35886|size96|read17|cov8.40_127231	armHet	3L	3L	non-TE non-Satellite
nw>contig36246|size210|read36|cov8.36_1237286	armHet	3L	3L	non-TE non-Satellite
nw>contig36339|size261|read50|cov8.89_847301	armHet	3L	3L	non-TE non-Satellite
nw>contig36898|size263|read47|cov8.58_1887384	armHet	3L	3L	non-TE non-Satellite
nw>contig37208|size146|read35|cov10.36_397441	armHet	3L	3L	non-TE non-Satellite
nw>contig37874|size70|read11|cov8.01_07538	armHet	3L	3L	non-TE non-Satellite
nw>contig37940|size157|read28|cov8.39_547552	armHet	3L	3L	non-TE non-Satellite
nw>contig3815|size161|read48|cov14.53_37600	armHet	3L	3L	non-TE non-Satellite
nw>contig38245|size94|read16|cov8.22_107609	armHet	3L	3L	non-TE non-Satellite
nw>contig38281|size107|read28|cov12.30_267616	armHet	3L	3L	non-TE non-Satellite
nw>contig39155|size195|read32|cov8.05_47751	armHet	3L	3L	non-TE non-Satellite
nw>contig39411|size129|read27|cov8.67_07795	armHet	3L	3L	non-TE non-Satellite
nw>contig39476|size113|read25|cov9.87_537800	armHet	3L	3L	non-TE non-Satellite
nw>contig39554|size170|read29|cov8.07_577811	armHet	3L	3L	non-TE non-Satellite
nw>contig39853|size121|read21|cov8.64_157849	armHet	3L	3L	non-TE non-Satellite
nw>contig4014|size136|read35|cov11.89_697894	armHet	3L	3L	non-TE non-Satellite
nw>contig40996|size114|read25|cov10.21_277985	armHet	3L	3L	non-TE non-Satellite
nw>contig4188|size517|read269|cov24.34_1288081	armHet	3L	3L	non-TE non-Satellite
nw>contig42094|size112|read20|cov8.71_528105	armHet	3L	3L	non-TE non-Satellite
nw>contig4214|size445|read293|cov30.54_2268110	armHet	3L	3L	non-TE non-Satellite
nw>contig4270|size309|read104|cov16.12_858161	armHet	3L	3L	non-TE non-Satellite
nw>contig42761|size118|read26|cov10.12_398164	armHet	3L	3L	non-TE non-Satellite
nw>contig43278|size185|read31|cov8.19_228213	armHet	3L	3L	non-TE non-Satellite
nw>contig44331|size117|read21|cov8.49_398307	armHet	3L	3L	non-TE non-Satellite
nw>contig44960|size113|read21|cov8.34_38350	armHet	3L	3L	non-TE non-Satellite
nw>contig45317|size141|read24|cov8.23_08380	armHet	3L	3L	non-TE non-Satellite
nw>contig4564|size396|read93|cov11.44_2948403	armHet	3L	3L	non-TE non-Satellite
nw>contig46507|size129|read23|cov8.61_128484	armHet	3L	3L	non-TE non-Satellite
nw>contig46560|size76|read16|cov9.36_78487	armHet	3L	3L	non-TE non-Satellite
nw>contig4745|size226|read59|cov12.51_388569	armHet	3L	3L	non-TE non-Satellite
nw>contig4959|size174|read34|cov9.20_198753	armHet	3L	3L	non-TE non-Satellite
nw>contig5094|size338|read116|cov16.19_2538864	armHet	3L	3L	non-TE non-Satellite
nw>contig5215|size342|read117|cov16.10_2388977	armHet	3L	3L	non-TE non-Satellite
nw>contig52258|size214|read42|cov8.99_1408984	armHet	3L	3L	non-TE non-Satellite
nw>contig5442|size653|read265|cov19.18_2139161	armHet	3L	3L	non-TE non-Satellite
nw>contig54866|size121|read26|cov10.74_339192	armHet	3L	3L	non-TE non-Satellite
nw>contig5555|size167|read48|cov12.22_29251	armHet	3L	3L	non-TE non-Satellite
nw>contig55926|size154|read30|cov9.05_29285	armHet	3L	3L	non-TE non-Satellite
nw>contig6446|size121|read20|cov8.05_589877	armHet	3L	3L	non-TE non-Satellite
nw>contig6516|size144|read46|cov16.17_399924	armHet	3L	3L	non-TE non-Satellite
nw>contig6528|size307|read76|cov11.36_1289932	armHet	3L	3L	non-TE non-Satellite
nw>contig6619|size939|read241|cov12.13_6149992	armHet	3L	3L	non-TE non-Satellite
nw>contig6666|size313|read78|cov11.62_24910028	armHet	3L	3L	non-TE non-Satellite
nw>contig6778|size402|read74|cov8.77_10310111	armHet	3L	3L	non-TE non-Satellite
nw>contig67814|size141|read26|cov8.21_3510113	armHet	3L	3L	non-TE non-Satellite
nw>contig67959|size162|read34|cov9.23_210123	armHet	3L	3L	non-TE non-Satellite
nw>contig6832|size70|read42|cov21.64_101390	armHet	3L	3L	non-TE non-Satellite
nw>contig6845|size869|read392|cov21.17_53210158	armHet	3L	3L	non-TE non-Satellite
nw>contig6981|size209|read107|cov24.67_1010245	armHet	3L	3L	non-TE non-Satellite
nw>contig7209|size126|read31|cov11.52_610389	armHet	3L	3L	non-TE non-Satellite
nw>contig7212|size302|read84|cov12.44_22610391	armHet	3L	3L	non-TE non-Satellite
nw>contig7218|size89|read23|cov12.04_710394	armHet	3L	3L	non-TE non-Satellite
nw>contig7219|size159|read48|cov14.48_9910395	armHet	3L	3L	non-TE non-Satellite
nw>contig7325|size413|read92|cov10.84_310469	armHet	3L	3L	non-TE non-Satellite
nw>contig7352|size138|read24|cov8.18_6210483	armHet	3L	3L	non-TE non-Satellite
nw>contig7359|size476|read381|cov37.96_34210488	armHet	3L	3L	non-TE non-Satellite
nw>contig7442|size325|read65|cov9.42_13610542	armHet	3L	3L	non-TE non-Satellite
nw>contig7453|size256|read56|cov10.35_010552	armHet	3L	3L	non-TE non-Satellite
nw>contig7578|size231|read56|cov11.46_7510627	armHet	3L	3L	non-TE non-Satellite
nw>contig7639|size157|read39|cov11.84_2010658	armHet	3L	3L	non-TE non-Satellite
nw>contig7790|size84|read68|cov37.01_110747	armHet	3L	3L	non-TE non-Satellite
nw>contig7796|size220|read90|cov19.84_1510750	armHet	3L	3L	non-TE non-Satellite
nw>contig7828|size320|read61|cov9.28_2110767	armHet	3L	3L	non-TE non-Satellite
nw>contig8003|size90|read20|cov10.16_3010872	armHet	3L	3L	non-TE non-Satellite
nw>contig8015|size187|read56|cov14.21_6010880	armHet	3L	3L	non-TE non-Satellite
nw>contig8166|size325|read111|cov15.05_12710963	armHet	3L	3L	non-TE non-Satellite
nw>contig8171|size313|read77|cov11.13_21010964	armHet	3L	3L	non-TE non-Satellite
nw>contig8386|size110|read21|cov8.98_1511094	armHet	3L	3L	non-TE non-Satellite
nw>contig8478|size1539|read686|cov20.92_81811142	armHet	3L	3L	non-TE non-Satellite
nw>contig8591|size83|read18|cov10.67_511212	armHet	3L	3L	non-TE non-Satellite
nw>contig8684|size208|read80|cov18.76_14611253	armHet	3L	3L	non-TE non-Satellite
nw>contig8889|size164|read34|cov10.12_4211355	armHet	3L	3L	non-TE non-Satellite
nw>contig9042|size323|read85|cov12.22_18511439	armHet	3L	3L	non-TE non-Satellite
nw>contig9117|size135|read35|cov12.41_6411480	armHet	3L	3L	non-TE non-Satellite
nw>contig9177|size440|read81|cov8.83_811517	armHet	3L	3L	non-TE non-Satellite
nw>contig9272|size122|read28|cov10.98_4211560	armHet	3L	3L	non-TE non-Satellite
nw>contig9280|size588|read196|cov15.50_23711566	armHet	3L	3L	non-TE non-Satellite
nw>contig9308|size221|read46|cov10.24_1011583	armHet	3L	3L	non-TE non-Satellite
nw>contig9385|size653|read204|cov14.75_45411626	armHet	3L	3L	non-TE non-Satellite
nw>contig9403|size270|read82|cov14.11_4111636	armHet	3L	3L	non-TE non-Satellite
nw>contig9472|size144|read59|cov19.24_6511672	armHet	3L	3L	non-TE non-Satellite
nw>contig9500|size281|read60|cov10.23_511684	armHet	3L	3L	non-TE non-Satellite
nw>contig9503|size166|read90|cov25.54_5911687	armHet	3L	3L	non-TE non-Satellite
nw>contig9526|size807|read218|cov12.38_8211704	armHet	3L	3L	non-TE non-Satellite
nw>contig9586|size209|read37|cov8.30_6111733	armHet	3L	3L	non-TE non-Satellite
nw>contig9623|size199|read36|cov8.72_6611754	armHet	3L	3L	non-TE non-Satellite
nw>contig9733|size102|read17|cov8.12_1511802	armHet	3L	3L	non-TE non-Satellite
nw>contig9852|size256|read85|cov15.25_19011863	armHet	3L	3L	non-TE non-Satellite
R27430|siz85	armHet	3L	3L	non-TE non-Satellite
R29602|siz95	armHet	3L	3L	non-TE non-Satellite
R30235|siz97	armHet	3L	3L	non-TE non-Satellite
R6659|size170	armHet	3L	3L	non-TE non-Satellite
R8670|size185	armHet	3L	3L	non-TE non-Satellite
ru>contig11281|size594|read236|cov18.61_52316	armHet	3L	3L	non-TE non-Satellite
ru>contig12031|size227|read94|cov19.01_16622	armHet	3L	3L	non-TE non-Satellite
ru>contig27430|size160|read29|cov8.85_1785	armHet	3L	3L	non-TE non-Satellite
ru>contig30235|size142|read34|cov11.44_7797	armHet	3L	3L	non-TE non-Satellite
ru>contig5625|size492|read302|cov28.56_379154	armHet	3L	3L	non-TE non-Satellite
ru>contig8670|size846|read309|cov17.04_67185	armHet	3L	3L	non-TE non-Satellite
nw>contig10160|size126|read61|cov23.83_4483	armHet	3L	3L	Satellite	356bp
nw>contig18366|size94|read18|cov8.37_293224	armHet	3L	3L	Satellite	356bp
nw>contig22008|size83|read22|cov12.36_114277	armHet	3L	3L	Satellite	356bp
nw>contig30012|size99|read20|cov9.72_306169	armHet	3L	3L	Satellite	356bp
nw>contig32479|size84|read14|cov8.04_176654	armHet	3L	3L	Satellite	356bp
nw>contig9883|size81|read16|cov10.00_111880	armHet	3L	3L	Satellite	356bp
nw>contig10674|size206|read47|cov10.97_134345	armHet	3L	3L	TE	297
nw>contig10803|size111|read23|cov10.04_28402	armHet	3L	3L	TE	Stalker4
nw>contig11197|size102|read19|cov9.50_23577	armHet	3L	3L	TE	S
nw>contig11398|size208|read67|cov15.46_10692	armHet	3L	3L	TE	INE-1
nw>contig11672|size111|read21|cov8.22_44827	armHet	3L	3L	TE	Stalker4
nw>contig12534|size241|read51|cov10.21_1451134	armHet	3L	3L	TE	gypsy12
nw>contig12847|size390|read89|cov10.62_2351244	armHet	3L	3L	TE	297
nw>contig12852|size215|read87|cov19.60_21246	armHet	3L	3L	TE	X
nw>contig12882|size115|read22|cov8.97_141257	armHet	3L	3L	TE	ninja-Dsim-like
nw>contig13272|size131|read43|cov15.39_101397	armHet	3L	3L	TE	gypsy12
nw>contig13273|size127|read48|cov18.34_261398	armHet	3L	3L	TE	1360
nw>contig14871|size86|read14|cov8.07_01984	armHet	3L	3L	TE	Cr1a
nw>contig14903|size98|read23|cov11.24_142000	armHet	3L	3L	TE	1360
nw>contig15843|size127|read24|cov8.36_352355	armHet	3L	3L	TE	Dm88
nw>contig15973|size112|read19|cov8.62_312405	armHet	3L	3L	TE	HeT-A
nw>contig16439|size205|read46|cov10.65_52560	armHet	3L	3L	TE	INE-1
nw>contig16838|size211|read95|cov21.14_812689	armHet	3L	3L	TE	Rt1b
nw>contig17208|size284|read104|cov16.38_1362827	armHet	3L	3L	TE	INE-1
nw>contig17329|size87|read21|cov9.93_162866	armHet	3L	3L	TE	INE-1
nw>contig17953|size185|read40|cov10.27_213076	armHet	3L	3L	TE	Stalker4
nw>contig18170|size157|read27|cov8.17_643151	armHet	3L	3L	TE	Cr1a
nw>contig18327|size112|read29|cov12.38_293210	armHet	3L	3L	TE	INE-1
nw>contig18626|size244|read54|cov10.40_43296	armHet	3L	3L	TE	INE-1
nw>contig19543|size276|read83|cov14.03_1953577	armHet	3L	3L	TE	gypsy12
nw>contig20030|size163|read41|cov11.47_133723	armHet	3L	3L	TE	INE-1
nw>contig20842|size73|read12|cov8.16_93960	armHet	3L	3L	TE	gypsy6
nw>contig21353|size155|read31|cov9.68_634101	armHet	3L	3L	TE	INE-1
nw>contig21417|size124|read22|cov8.44_294116	armHet	3L	3L	TE	Fw2
nw>contig22226|size176|read60|cov15.96_04333	armHet	3L	3L	TE	1360
nw>contig22716|size104|read17|cov8.05_214461	armHet	3L	3L	TE	Stalker4
nw>contig23192|size72|read12|cov8.11_114604	armHet	3L	3L	TE	INE-1
nw>contig23359|size113|read20|cov8.45_44646	armHet	3L	3L	TE	Rt1a
nw>contig23730|size274|read48|cov8.38_2144746	armHet	3L	3L	TE	Stalker4
nw>contig24971|size229|read40|cov8.17_05050	armHet	3L	3L	TE	G5A
nw>contig26022|size102|read23|cov9.84_275304	armHet	3L	3L	TE	gypsy8
nw>contig26973|size72|read16|cov10.06_05537	armHet	3L	3L	TE	S
nw>contig28262|size98|read23|cov11.08_165800	armHet	3L	3L	TE	INE-1
nw>contig31037|size246|read48|cov9.50_1276378	armHet	3L	3L	TE	Cr1a
nw>contig31773|size103|read17|cov8.29_416520	armHet	3L	3L	TE	297
nw>contig32026|size185|read32|cov8.10_376562	armHet	3L	3L	TE	Helena
nw>contig33264|size90|read16|cov8.49_06791	armHet	3L	3L	TE	X
nw>contig34133|size125|read21|cov8.10_636938	armHet	3L	3L	TE	Quasimodo
nw>contig35468|size103|read18|cov8.26_427156	armHet	3L	3L	TE	gypsy4
nw>contig3554|size77|read61|cov35.43_07175	armHet	3L	3L	TE	gypsy8
nw>contig3578|size184|read50|cov12.72_627210	armHet	3L	3L	TE	Rt1b
nw>contig37289|size83|read14|cov8.25_227454	armHet	3L	3L	TE	INE-1
nw>contig39304|size140|read30|cov10.34_227779	armHet	3L	3L	TE	Stalker4
nw>contig41807|size135|read34|cov11.59_468074	armHet	3L	3L	TE	INE-1
nw>contig4459|size228|read53|cov10.94_728326	armHet	3L	3L	TE	INE-1
nw>contig4691|size130|read28|cov10.62_558518	armHet	3L	3L	TE	diver2
nw>contig5598|size400|read124|cov14.72_2189289	armHet	3L	3L	TE	I
nw>contig7344|size183|read36|cov9.33_11610479	armHet	3L	3L	TE	Stalker4
nw>contig7448|size206|read76|cov14.63_8410545	armHet	3L	3L	TE	INE-1
nw>contig7527|size252|read81|cov14.84_810594	armHet	3L	3L	TE	Cr1a
nw>contig8700|size72|read27|cov17.26_1211261	armHet	3L	3L	TE	gypsy6
nw>contig8770|size202|read59|cov12.19_8011306	armHet	3L	3L	TE	INE-1
nw>contig8864|size139|read24|cov8.39_3011344	armHet	3L	3L	TE	invader3
nw>contig9321|size164|read43|cov12.95_3311586	armHet	3L	3L	TE	micropia
nw>contig9590|size315|read57|cov8.77_21211736	armHet	3L	3L	TE	G3
nw>contig9750|size303|read59|cov9.46_1311810	armHet	3L	3L	TE	gypsy2
nw>contig10129|size117|read24|cov9.76_4367	armHet	3R	3R	non-TE non-Satellite
nw>contig10218|size442|read107|cov11.26_33114	armHet	3R	3R	non-TE non-Satellite
nw>contig10262|size257|read62|cov11.23_195139	armHet	3R	3R	non-TE non-Satellite
nw>contig10323|size262|read72|cov13.24_196161	armHet	3R	3R	non-TE non-Satellite
nw>contig10438|size337|read85|cov12.39_39222	armHet	3R	3R	non-TE non-Satellite
nw>contig10448|size139|read24|cov8.23_57227	armHet	3R	3R	non-TE non-Satellite
nw>contig10815|size97|read22|cov11.35_20406	armHet	3R	3R	non-TE non-Satellite
nw>contig10926|size418|read122|cov13.73_355457	armHet	3R	3R	non-TE non-Satellite
nw>contig10972|size277|read57|cov9.82_92478	armHet	3R	3R	non-TE non-Satellite
nw>contig1125|size299|read245|cov39.09_239610	armHet	3R	3R	non-TE non-Satellite
nw>contig11371|size179|read43|cov11.82_39675	armHet	3R	3R	non-TE non-Satellite
nw>contig11512|size438|read153|cov16.89_119752	armHet	3R	3R	non-TE non-Satellite
nw>contig11768|size131|read38|cov13.34_1871	armHet	3R	3R	non-TE non-Satellite
nw>contig11793|size127|read25|cov8.74_25880	armHet	3R	3R	non-TE non-Satellite
nw>contig11918|size226|read46|cov10.04_54917	armHet	3R	3R	non-TE non-Satellite
nw>contig11935|size237|read47|cov9.76_53922	armHet	3R	3R	non-TE non-Satellite
nw>contig12010|size520|read109|cov9.89_0946	armHet	3R	3R	non-TE non-Satellite
nw>contig12017|size298|read156|cov25.15_8950	armHet	3R	3R	non-TE non-Satellite
nw>contig12066|size240|read44|cov8.50_143970	armHet	3R	3R	non-TE non-Satellite
nw>contig12172|size114|read22|cov9.48_541005	armHet	3R	3R	non-TE non-Satellite
nw>contig12208|size551|read163|cov13.73_2011017	armHet	3R	3R	non-TE non-Satellite
nw>contig12270|size241|read60|cov11.95_1411042	armHet	3R	3R	non-TE non-Satellite
nw>contig12301|size117|read35|cov14.63_401053	armHet	3R	3R	non-TE non-Satellite
nw>contig12310|size136|read31|cov10.48_471056	armHet	3R	3R	non-TE non-Satellite
nw>contig12445|size133|read26|cov9.29_351099	armHet	3R	3R	non-TE non-Satellite
nw>contig12455|size793|read220|cov13.28_4631104	armHet	3R	3R	non-TE non-Satellite
nw>contig12642|size335|read87|cov12.21_1681172	armHet	3R	3R	non-TE non-Satellite
nw>contig12864|size889|read289|cov15.22_2771253	armHet	3R	3R	non-TE non-Satellite
nw>contig12906|size179|read44|cov11.17_101265	armHet	3R	3R	non-TE non-Satellite
nw>contig12946|size130|read27|cov9.21_521280	armHet	3R	3R	non-TE non-Satellite
nw>contig12954|size111|read20|cov8.49_491283	armHet	3R	3R	non-TE non-Satellite
nw>contig12980|size153|read27|cov8.68_151290	armHet	3R	3R	non-TE non-Satellite
nw>contig12981|size81|read15|cov8.47_11291	armHet	3R	3R	non-TE non-Satellite
nw>contig13109|size228|read61|cov12.86_311342	armHet	3R	3R	non-TE non-Satellite
nw>contig13131|size132|read26|cov9.32_91349	armHet	3R	3R	non-TE non-Satellite
nw>contig13150|size233|read59|cov12.55_1711359	armHet	3R	3R	non-TE non-Satellite
nw>contig13419|size209|read37|cov8.33_611462	armHet	3R	3R	non-TE non-Satellite
nw>contig14088|size90|read24|cov9.80_241705	armHet	3R	3R	non-TE non-Satellite
nw>contig14144|size459|read111|cov11.58_3371723	armHet	3R	3R	non-TE non-Satellite
nw>contig14194|size140|read25|cov8.70_311742	armHet	3R	3R	non-TE non-Satellite
nw>contig1420|size261|read192|cov34.79_651748	armHet	3R	3R	non-TE non-Satellite
nw>contig14391|size183|read44|cov11.54_151811	armHet	3R	3R	non-TE non-Satellite
nw>contig14429|size176|read48|cov12.56_521825	armHet	3R	3R	non-TE non-Satellite
nw>contig14711|size151|read27|cov8.19_781923	armHet	3R	3R	non-TE non-Satellite
nw>contig14985|size195|read34|cov8.29_862031	armHet	3R	3R	non-TE non-Satellite
nw>contig15007|size673|read185|cov12.43_4212039	armHet	3R	3R	non-TE non-Satellite
nw>contig15048|size180|read39|cov10.42_02050	armHet	3R	3R	non-TE non-Satellite
nw>contig15294|size470|read98|cov9.70_4102146	armHet	3R	3R	non-TE non-Satellite
nw>contig15403|size320|read91|cov13.41_2182189	armHet	3R	3R	non-TE non-Satellite
nw>contig15422|size100|read21|cov9.43_12194	armHet	3R	3R	non-TE non-Satellite
nw>contig15551|size266|read48|cov8.47_2012243	armHet	3R	3R	non-TE non-Satellite
nw>contig15668|size143|read28|cov9.43_722289	armHet	3R	3R	non-TE non-Satellite
nw>contig15758|size323|read63|cov9.39_1662325	armHet	3R	3R	non-TE non-Satellite
nw>contig15864|size278|read51|cov8.73_612364	armHet	3R	3R	non-TE non-Satellite
nw>contig15960|size293|read58|cov9.53_662400	armHet	3R	3R	non-TE non-Satellite
nw>contig1617|size528|read1109|cov99.63_3712478	armHet	3R	3R	non-TE non-Satellite
nw>contig16334|size519|read146|cov13.18_3972532	armHet	3R	3R	non-TE non-Satellite
nw>contig16373|size369|read131|cov17.18_2742544	armHet	3R	3R	non-TE non-Satellite
nw>contig16447|size80|read15|cov9.07_202562	armHet	3R	3R	non-TE non-Satellite
nw>contig16913|size173|read31|cov8.54_1102725	armHet	3R	3R	non-TE non-Satellite
nw>contig16940|size86|read32|cov17.76_242739	armHet	3R	3R	non-TE non-Satellite
nw>contig17098|size148|read25|cov8.43_792794	armHet	3R	3R	non-TE non-Satellite
nw>contig17279|size144|read27|cov8.58_242850	armHet	3R	3R	non-TE non-Satellite
nw>contig17393|size331|read82|cov11.19_422892	armHet	3R	3R	non-TE non-Satellite
nw>contig17636|size208|read52|cov11.67_1302973	armHet	3R	3R	non-TE non-Satellite
nw>contig17715|size155|read30|cov8.99_632991	armHet	3R	3R	non-TE non-Satellite
nw>contig17764|size230|read51|cov10.71_1233004	armHet	3R	3R	non-TE non-Satellite
nw>contig17786|size186|read37|cov9.11_183010	armHet	3R	3R	non-TE non-Satellite
nw>contig17866|size148|read26|cov8.41_23047	armHet	3R	3R	non-TE non-Satellite
nw>contig18012|size448|read233|cov22.33_3503092	armHet	3R	3R	non-TE non-Satellite
nw>contig18485|size381|read78|cov9.73_453262	armHet	3R	3R	non-TE non-Satellite
nw>contig18531|size115|read26|cov10.74_83273	armHet	3R	3R	non-TE non-Satellite
nw>contig18595|size530|read140|cov12.14_33289	armHet	3R	3R	non-TE non-Satellite
nw>contig18773|size103|read17|cov8.42_23343	armHet	3R	3R	non-TE non-Satellite
nw>contig1891|size512|read494|cov46.13_843380	armHet	3R	3R	non-TE non-Satellite
nw>contig19040|size138|read24|cov8.41_773422	armHet	3R	3R	non-TE non-Satellite
nw>contig19114|size242|read51|cov9.92_223442	armHet	3R	3R	non-TE non-Satellite
nw>contig19349|size217|read59|cov12.47_93516	armHet	3R	3R	non-TE non-Satellite
nw>contig19459|size363|read75|cov9.74_743551	armHet	3R	3R	non-TE non-Satellite
nw>contig19582|size79|read14|cov8.08_163589	armHet	3R	3R	non-TE non-Satellite
nw>contig19618|size143|read25|cov8.31_83600	armHet	3R	3R	non-TE non-Satellite
nw>contig20010|size129|read26|cov9.78_473718	armHet	3R	3R	non-TE non-Satellite
nw>contig20058|size272|read51|cov8.71_1183731	armHet	3R	3R	non-TE non-Satellite
nw>contig20181|size340|read86|cov12.04_903764	armHet	3R	3R	non-TE non-Satellite
nw>contig20330|size113|read21|cov8.79_233804	armHet	3R	3R	non-TE non-Satellite
nw>contig20548|size90|read17|cov9.41_13866	armHet	3R	3R	non-TE non-Satellite
nw>contig20577|size289|read71|cov12.11_2243874	armHet	3R	3R	non-TE non-Satellite
nw>contig20755|size237|read56|cov10.76_1383933	armHet	3R	3R	non-TE non-Satellite
nw>contig20871|size313|read59|cov8.91_2533968	armHet	3R	3R	non-TE non-Satellite
nw>contig20884|size222|read50|cov10.77_13972	armHet	3R	3R	non-TE non-Satellite
nw>contig2092|size1344|read924|cov32.40_10503991	armHet	3R	3R	non-TE non-Satellite
nw>contig21445|size234|read48|cov9.77_974123	armHet	3R	3R	non-TE non-Satellite
nw>contig21477|size114|read19|cov8.29_544136	armHet	3R	3R	non-TE non-Satellite
nw>contig21687|size97|read19|cov9.69_34193	armHet	3R	3R	non-TE non-Satellite
nw>contig21844|size184|read59|cov14.78_884227	armHet	3R	3R	non-TE non-Satellite
nw>contig22005|size260|read47|cov8.61_774276	armHet	3R	3R	non-TE non-Satellite
nw>contig22049|size171|read33|cov9.59_634287	armHet	3R	3R	non-TE non-Satellite
nw>contig22195|size444|read101|cov11.02_154323	armHet	3R	3R	non-TE non-Satellite
nw>contig22206|size74|read19|cov12.69_54325	armHet	3R	3R	non-TE non-Satellite
nw>contig22630|size111|read23|cov10.02_174435	armHet	3R	3R	non-TE non-Satellite
nw>contig22757|size140|read25|cov8.23_774472	armHet	3R	3R	non-TE non-Satellite
nw>contig22779|size211|read38|cov8.40_1334480	armHet	3R	3R	non-TE non-Satellite
nw>contig22858|size128|read24|cov9.29_524503	armHet	3R	3R	non-TE non-Satellite
nw>contig23022|size207|read38|cov8.94_94555	armHet	3R	3R	non-TE non-Satellite
nw>contig23122|size341|read63|cov8.76_1164582	armHet	3R	3R	non-TE non-Satellite
nw>contig23430|size100|read28|cov12.89_54667	armHet	3R	3R	non-TE non-Satellite
nw>contig23525|size132|read33|cov11.36_444696	armHet	3R	3R	non-TE non-Satellite
nw>contig23625|size209|read46|cov10.28_1104719	armHet	3R	3R	non-TE non-Satellite
nw>contig2372|size368|read162|cov21.01_994745	armHet	3R	3R	non-TE non-Satellite
nw>contig23913|size71|read14|cov9.51_04786	armHet	3R	3R	non-TE non-Satellite
nw>contig24395|size191|read51|cov11.68_1024906	armHet	3R	3R	non-TE non-Satellite
nw>contig24403|size194|read37|cov8.79_454910	armHet	3R	3R	non-TE non-Satellite
nw>contig24458|size90|read18|cov9.69_94921	armHet	3R	3R	non-TE non-Satellite
nw>contig24696|size93|read22|cov10.60_264980	armHet	3R	3R	non-TE non-Satellite
nw>contig24718|size100|read18|cov8.45_14989	armHet	3R	3R	non-TE non-Satellite
nw>contig24883|size113|read20|cov8.50_105022	armHet	3R	3R	non-TE non-Satellite
nw>contig24989|size99|read23|cov11.74_195054	armHet	3R	3R	non-TE non-Satellite
nw>contig25067|size282|read56|cov8.92_185072	armHet	3R	3R	non-TE non-Satellite
nw>contig25621|size110|read56|cov20.06_24849	armHet	3R	3R	non-TE non-Satellite
nw>contig25636|size126|read31|cov12.17_365204	armHet	3R	3R	non-TE non-Satellite
nw>contig25759|size302|read74|cov11.68_2415240	armHet	3R	3R	non-TE non-Satellite
nw>contig25920|size194|read38|cov9.22_255280	armHet	3R	3R	non-TE non-Satellite
nw>contig25931|size92|read23|cov11.64_315286	armHet	3R	3R	non-TE non-Satellite
nw>contig26425|size219|read58|cov12.35_1075417	armHet	3R	3R	non-TE non-Satellite
nw>contig26445|size100|read23|cov10.35_25419	armHet	3R	3R	non-TE non-Satellite
nw>contig26947|size165|read49|cov14.28_625532	armHet	3R	3R	non-TE non-Satellite
nw>contig26992|size164|read31|cov8.94_945544	armHet	3R	3R	non-TE non-Satellite
nw>contig27312|size139|read37|cov12.91_495606	armHet	3R	3R	non-TE non-Satellite
nw>contig27317|size172|read55|cov15.43_425607	armHet	3R	3R	non-TE non-Satellite
nw>contig2739|size226|read182|cov36.54_1385626	armHet	3R	3R	non-TE non-Satellite
nw>contig27450|size177|read52|cov13.86_465641	armHet	3R	3R	non-TE non-Satellite
nw>contig27541|size230|read52|cov10.31_245654	armHet	3R	3R	non-TE non-Satellite
nw>contig28137|size161|read30|cov9.11_65774	armHet	3R	3R	non-TE non-Satellite
nw>contig28155|size235|read44|cov8.89_1295779	armHet	3R	3R	non-TE non-Satellite
nw>contig29296|size137|read23|cov8.12_716020	armHet	3R	3R	non-TE non-Satellite
nw>contig29485|size266|read53|cov9.32_56053	armHet	3R	3R	non-TE non-Satellite
nw>contig29534|size145|read25|cov8.22_216067	armHet	3R	3R	non-TE non-Satellite
nw>contig29712|size196|read34|cov8.34_976104	armHet	3R	3R	non-TE non-Satellite
nw>contig29807|size142|read24|cov8.31_336126	armHet	3R	3R	non-TE non-Satellite
nw>contig30015|size116|read21|cov8.56_366170	armHet	3R	3R	non-TE non-Satellite
nw>contig30587|size129|read21|cov8.16_626292	armHet	3R	3R	non-TE non-Satellite
nw>contig30817|size193|read40|cov9.54_486337	armHet	3R	3R	non-TE non-Satellite
nw>contig31776|size288|read50|cov8.08_2266521	armHet	3R	3R	non-TE non-Satellite
nw>contig32146|size127|read25|cov9.81_586581	armHet	3R	3R	non-TE non-Satellite
nw>contig32198|size148|read30|cov9.38_586593	armHet	3R	3R	non-TE non-Satellite
nw>contig3273|size165|read98|cov28.61_106706	armHet	3R	3R	non-TE non-Satellite
nw>contig34102|size145|read28|cov9.05_66933	armHet	3R	3R	non-TE non-Satellite
nw>contig34225|size124|read27|cov10.16_246955	armHet	3R	3R	non-TE non-Satellite
nw>contig34512|size245|read48|cov9.45_1207006	armHet	3R	3R	non-TE non-Satellite
nw>contig34715|size151|read27|cov8.11_167036	armHet	3R	3R	non-TE non-Satellite
nw>contig35464|size205|read39|cov8.53_137155	armHet	3R	3R	non-TE non-Satellite
nw>contig35469|size148|read37|cov11.95_537157	armHet	3R	3R	non-TE non-Satellite
nw>contig35905|size130|read28|cov9.98_207236	armHet	3R	3R	non-TE non-Satellite
nw>contig35925|size78|read15|cov8.83_147240	armHet	3R	3R	non-TE non-Satellite
nw>contig36331|size208|read43|cov9.43_967300	armHet	3R	3R	non-TE non-Satellite
nw>contig36502|size122|read24|cov8.93_367324	armHet	3R	3R	non-TE non-Satellite
nw>contig36842|size83|read16|cov8.84_47376	armHet	3R	3R	non-TE non-Satellite
nw>contig3706|size276|read68|cov11.42_1817413	armHet	3R	3R	non-TE non-Satellite
nw>contig37092|size137|read24|cov8.80_457418	armHet	3R	3R	non-TE non-Satellite
nw>contig37102|size123|read29|cov11.53_447420	armHet	3R	3R	non-TE non-Satellite
nw>contig37221|size171|read29|cov8.28_997444	armHet	3R	3R	non-TE non-Satellite
nw>contig3796|size100|read68|cov31.51_197557	armHet	3R	3R	non-TE non-Satellite
nw>contig38151|size134|read23|cov8.29_97596	armHet	3R	3R	non-TE non-Satellite
nw>contig3834|size84|read24|cov14.04_87625	armHet	3R	3R	non-TE non-Satellite
nw>contig38568|size157|read30|cov9.23_907658	armHet	3R	3R	non-TE non-Satellite
nw>contig39096|size169|read30|cov8.03_1047742	armHet	3R	3R	non-TE non-Satellite
nw>contig3912|size203|read109|cov24.85_307746	armHet	3R	3R	non-TE non-Satellite
nw>contig39344|size162|read36|cov10.14_77784	armHet	3R	3R	non-TE non-Satellite
nw>contig3936|size319|read89|cov13.21_1177789	armHet	3R	3R	non-TE non-Satellite
nw>contig3941|size275|read92|cov15.76_627796	armHet	3R	3R	non-TE non-Satellite
nw>contig3961|size167|read29|cov8.31_407818	armHet	3R	3R	non-TE non-Satellite
nw>contig40272|size144|read28|cov9.42_307909	armHet	3R	3R	non-TE non-Satellite
nw>contig4065|size71|read43|cov28.59_07948	armHet	3R	3R	non-TE non-Satellite
nw>contig4078|size182|read107|cov27.26_567965	armHet	3R	3R	non-TE non-Satellite
nw>contig41400|size181|read41|cov10.81_178025	armHet	3R	3R	non-TE non-Satellite
nw>contig4184|size107|read27|cov12.24_18078	armHet	3R	3R	non-TE non-Satellite
nw>contig4187|size239|read50|cov10.12_258080	armHet	3R	3R	non-TE non-Satellite
nw>contig42484|size241|read162|cov23.91_61147	armHet	3R	3R	non-TE non-Satellite
nw>contig46054|size151|read33|cov10.51_608440	armHet	3R	3R	non-TE non-Satellite
nw>contig4606|size135|read40|cov13.82_08443	armHet	3R	3R	non-TE non-Satellite
nw>contig4682|size407|read106|cov12.13_2178510	armHet	3R	3R	non-TE non-Satellite
nw>contig47076|size193|read34|cov8.30_1088533	armHet	3R	3R	non-TE non-Satellite
nw>contig4725|size333|read72|cov10.35_728548	armHet	3R	3R	non-TE non-Satellite
nw>contig4997|size400|read194|cov23.12_288789	armHet	3R	3R	non-TE non-Satellite
nw>contig50412|size101|read18|cov8.55_68826	armHet	3R	3R	non-TE non-Satellite
nw>contig5115|size366|read132|cov16.80_238887	armHet	3R	3R	non-TE non-Satellite
nw>contig55018|size227|read45|cov9.52_1469208	armHet	3R	3R	non-TE non-Satellite
nw>contig5695|size160|read62|cov18.49_259367	armHet	3R	3R	non-TE non-Satellite
nw>contig59767|size89|read17|cov8.75_139571	armHet	3R	3R	non-TE non-Satellite
nw>contig6029|size167|read56|cov15.93_919606	armHet	3R	3R	non-TE non-Satellite
nw>contig6091|size191|read51|cov12.69_979645	armHet	3R	3R	non-TE non-Satellite
nw>contig6147|size414|read115|cov13.72_439684	armHet	3R	3R	non-TE non-Satellite
nw>contig61534|size133|read27|cov9.84_139688	armHet	3R	3R	non-TE non-Satellite
nw>contig6261|size956|read306|cov14.92_4469748	armHet	3R	3R	non-TE non-Satellite
nw>contig6347|size643|read139|cov10.39_29813	armHet	3R	3R	non-TE non-Satellite
nw>contig6386|size359|read218|cov28.85_689841	armHet	3R	3R	non-TE non-Satellite
nw>contig64676|size101|read17|cov8.38_249890	armHet	3R	3R	non-TE non-Satellite
nw>contig65944|size102|read19|cov9.01_309974	armHet	3R	3R	non-TE non-Satellite
nw>contig65953|size150|read29|cov8.85_909976	armHet	3R	3R	non-TE non-Satellite
nw>contig6653|size228|read89|cov18.65_9110015	armHet	3R	3R	non-TE non-Satellite
nw>contig6862|size91|read22|cov11.76_1410166	armHet	3R	3R	non-TE non-Satellite
nw>contig6915|size176|read52|cov13.67_9610203	armHet	3R	3R	non-TE non-Satellite
nw>contig6916|size100|read17|cov8.66_1610204	armHet	3R	3R	non-TE non-Satellite
nw>contig6958|size102|read31|cov14.11_210229	armHet	3R	3R	non-TE non-Satellite
nw>contig7020|size204|read102|cov24.39_3410273	armHet	3R	3R	non-TE non-Satellite
nw>contig7143|size309|read98|cov14.98_15810348	armHet	3R	3R	non-TE non-Satellite
nw>contig7245|size233|read41|cov8.65_410413	armHet	3R	3R	non-TE non-Satellite
nw>contig7290|size82|read19|cov11.10_2210447	armHet	3R	3R	non-TE non-Satellite
nw>contig7332|size137|read44|cov14.93_7410475	armHet	3R	3R	non-TE non-Satellite
nw>contig7374|size198|read176|cov40.46_9110499	armHet	3R	3R	non-TE non-Satellite
nw>contig7396|size148|read27|cov8.54_4510510	armHet	3R	3R	non-TE non-Satellite
nw>contig7762|size209|read54|cov12.18_4010732	armHet	3R	3R	non-TE non-Satellite
nw>contig7765|size709|read186|cov12.68_43010734	armHet	3R	3R	non-TE non-Satellite
nw>contig7785|size815|read242|cov14.15_52310745	armHet	3R	3R	non-TE non-Satellite
nw>contig8001|size126|read92|cov34.58_210871	armHet	3R	3R	non-TE non-Satellite
nw>contig8039|size273|read48|cov8.49_21210895	armHet	3R	3R	non-TE non-Satellite
nw>contig8177|size320|read112|cov16.34_18810967	armHet	3R	3R	non-TE non-Satellite
nw>contig8276|size134|read30|cov11.00_511031	armHet	3R	3R	non-TE non-Satellite
nw>contig8395|size108|read19|cov8.52_2011103	armHet	3R	3R	non-TE non-Satellite
nw>contig8496|size576|read169|cov14.23_21311150	armHet	3R	3R	non-TE non-Satellite
nw>contig85132|size88|read16|cov8.19_1511163	armHet	3R	3R	non-TE non-Satellite
nw>contig8629|size144|read24|cov8.01_5811230	armHet	3R	3R	non-TE non-Satellite
nw>contig8686|size114|read24|cov10.47_911254	armHet	3R	3R	non-TE non-Satellite
nw>contig8736|size326|read163|cov21.69_12911283	armHet	3R	3R	non-TE non-Satellite
nw>contig8774|size161|read49|cov14.09_10111307	armHet	3R	3R	non-TE non-Satellite
nw>contig8903|size84|read15|cov8.57_211366	armHet	3R	3R	non-TE non-Satellite
nw>contig9011|size204|read55|cov12.64_7611424	armHet	3R	3R	non-TE non-Satellite
nw>contig9455|size436|read107|cov11.65_33611662	armHet	3R	3R	non-TE non-Satellite
nw>contig9463|size78|read14|cov8.74_1811667	armHet	3R	3R	non-TE non-Satellite
nw>contig949|size763|read758|cov46.71_9311683	armHet	3R	3R	non-TE non-Satellite
nw>contig9998|size105|read23|cov10.19_3811944	armHet	3R	3R	non-TE non-Satellite
R10163|siz1	armHet	3R	3R	non-TE non-Satellite
R10850|siz9	armHet	3R	3R	non-TE non-Satellite
R12428|siz27	armHet	3R	3R	non-TE non-Satellite
R3361|size113	armHet	3R	3R	non-TE non-Satellite
ru>contig10163|size473|read151|cov15.08_41	armHet	3R	3R	non-TE non-Satellite
ru>contig10850|size388|read80|cov9.52_409	armHet	3R	3R	non-TE non-Satellite
ru>contig12428|size125|read27|cov8.92_6227	armHet	3R	3R	non-TE non-Satellite
ru>contig29330|size253|read44|cov8.25_893	armHet	3R	3R	non-TE non-Satellite
ru>contig3361|size158|read49|cov14.58_16113	armHet	3R	3R	non-TE non-Satellite
nw>contig10385|size610|read170|cov13.10_347200	armHet	3R	3R	TE	Rt1b
nw>contig10666|size220|read41|cov8.74_138341	armHet	3R	3R	TE	I
nw>contig11482|size150|read29|cov9.49_52740	armHet	3R	3R	TE	copia
nw>contig11654|size78|read17|cov10.21_11818	armHet	3R	3R	TE	Idefix
nw>contig12493|size86|read22|cov11.83_261116	armHet	3R	3R	TE	invader1
nw>contig12926|size419|read128|cov14.71_3041273	armHet	3R	3R	TE	Stalker2
nw>contig12997|size368|read93|cov11.49_1941295	armHet	3R	3R	TE	gypsy2
nw>contig13046|size209|read49|cov11.43_1021316	armHet	3R	3R	TE	X
nw>contig13363|size88|read23|cov12.67_21439	armHet	3R	3R	TE	Rt1a
nw>contig13546|size206|read59|cov13.60_291515	armHet	3R	3R	TE	Rt1b
nw>contig13658|size259|read48|cov8.49_591550	armHet	3R	3R	TE	Tc1-2
nw>contig13944|size461|read142|cov14.53_3651649	armHet	3R	3R	TE	Cr1a
nw>contig14157|size94|read34|cov16.59_211730	armHet	3R	3R	TE	Rt1b
nw>contig14259|size241|read70|cov13.32_881766	armHet	3R	3R	TE	Rt1b
nw>contig14782|size171|read41|cov11.01_1051951	armHet	3R	3R	TE	gypsy8
nw>contig15095|size94|read18|cov9.37_32070	armHet	3R	3R	TE	frogger
nw>contig15250|size231|read40|cov8.10_1132133	armHet	3R	3R	TE	gypsy
nw>contig15446|size221|read66|cov13.79_592202	armHet	3R	3R	TE	gypsy9
nw>contig15640|size230|read44|cov9.27_1502281	armHet	3R	3R	TE	Rt1c
nw>contig15800|size147|read32|cov10.29_872336	armHet	3R	3R	TE	INE-1
nw>contig16509|size131|read25|cov8.98_502581	armHet	3R	3R	TE	HMS-Beagle
nw>contig17122|size155|read34|cov10.05_92801	armHet	3R	3R	TE	gypsy12
nw>contig17882|size296|read67|cov10.78_2303053	armHet	3R	3R	TE	Idefix
nw>contig19632|size94|read17|cov9.21_13605	armHet	3R	3R	TE	HMS-Beagle
nw>contig21244|size293|read54|cov8.67_1974075	armHet	3R	3R	TE	I
nw>contig21754|size164|read38|cov10.52_584208	armHet	3R	3R	TE	1360
nw>contig21813|size156|read26|cov8.23_864220	armHet	3R	3R	TE	gypsy12
nw>contig22167|size100|read62|cov22.46_19751	armHet	3R	3R	TE	INE-1
nw>contig24528|size131|read27|cov8.80_124938	armHet	3R	3R	TE	gypsy9
nw>contig24929|size70|read15|cov8.84_25039	armHet	3R	3R	TE	gypsy3
nw>contig25784|size187|read34|cov8.71_865248	armHet	3R	3R	TE	I
nw>contig26292|size104|read18|cov8.46_15387	armHet	3R	3R	TE	F
nw>contig28133|size148|read24|cov8.11_725772	armHet	3R	3R	TE	H
nw>contig2870|size112|read60|cov24.23_295898	armHet	3R	3R	TE	Circe
nw>contig30379|size120|read23|cov8.83_496238	armHet	3R	3R	TE	Idefix
nw>contig30501|size173|read34|cov9.32_156274	armHet	3R	3R	TE	copia
nw>contig30786|size142|read26|cov8.02_486328	armHet	3R	3R	TE	Doc3
nw>contig31420|size126|read23|cov8.01_586465	armHet	3R	3R	TE	Quasimodo
nw>contig33457|size157|read26|cov8.03_136834	armHet	3R	3R	TE	INE-1
nw>contig35503|size106|read18|cov8.66_467164	armHet	3R	3R	TE	invader1
nw>contig3810|size180|read69|cov17.70_1117586	armHet	3R	3R	TE	gypsy10
nw>contig38921|size118|read22|cov8.60_77709	armHet	3R	3R	TE	gypsy9
nw>contig4043|size210|read156|cov33.19_277927	armHet	3R	3R	TE	HMS-Beagle
nw>contig4224|size88|read44|cov24.50_88116	armHet	3R	3R	TE	G5
nw>contig4305|size82|read19|cov11.26_78193	armHet	3R	3R	TE	INE-1
nw>contig43253|size151|read32|cov9.84_748211	armHet	3R	3R	TE	HMS-Beagle
nw>contig45663|size122|read25|cov9.38_318405	armHet	3R	3R	TE	flea
nw>contig47831|size83|read17|cov9.61_28600	armHet	3R	3R	TE	Rt1b
nw>contig4983|size174|read59|cov16.53_208779	armHet	3R	3R	TE	hopper
nw>contig52202|size134|read27|cov9.07_08980	armHet	3R	3R	TE	INE-1
nw>contig5367|size210|read41|cov9.26_189102	armHet	3R	3R	TE	hopper
nw>contig53684|size72|read13|cov8.75_59103	armHet	3R	3R	TE	gypsy9
nw>contig54842|size120|read23|cov8.49_39190	armHet	3R	3R	TE	mariner2
nw>contig5770|size102|read34|cov16.21_189424	armHet	3R	3R	TE	F
nw>contig6024|size260|read75|cov13.57_499604	armHet	3R	3R	TE	gypsy12
nw>contig6193|size123|read53|cov20.28_369712	armHet	3R	3R	TE	HMS-Beagle
nw>contig6326|size108|read25|cov10.81_49803	armHet	3R	3R	TE	GATE
nw>contig64407|size228|read42|cov8.60_1579875	armHet	3R	3R	TE	Cr1a
nw>contig7040|size94|read32|cov16.21_2110289	armHet	3R	3R	TE	invader2
nw>contig7391|size104|read22|cov10.14_4410507	armHet	3R	3R	TE	HMS-Beagle
nw>contig7802|size143|read25|cov8.89_7910754	armHet	3R	3R	TE	HMS-Beagle
nw>contig8314|size222|read65|cov13.11_3211058	armHet	3R	3R	TE	INE-1
nw>contig9118|size80|read22|cov13.06_911481	armHet	3R	3R	TE	transib3
nw>contig9150|size281|read67|cov11.17_5911503	armHet	3R	3R	TE	HMS-Beagle2
nw>contig9286|size257|read94|cov17.99_14511570	armHet	3R	3R	TE	gypsy9
nw>contig9408|size225|read61|cov12.88_5811640	armHet	3R	3R	TE	297
nw>contig9518|size86|read25|cov13.16_111695	armHet	3R	3R	TE	Doc3
nw>contig9798|size274|read105|cov18.71_4811833	armHet	3R	3R	TE	HMS-Beagle
nw>contig2989|size102|read114|cov51.13_426144	armHet	X	X1	Satellite	359bp
nw>contig5380|size129|read45|cov16.24_669116	armHet	X	X1	Satellite	356bp
nw>contig9236|size95|read28|cov13.99_3511546	armHet	X	X1	Satellite	359bp
nw>contig16649|size238|read63|cov12.32_122620	armHet	X	X2	non-TE non-Satellite
nw>contig43129|size88|read19|cov10.38_288200	armHet	X	X2	non-TE non-Satellite
nw>contig34240|size262|read46|cov8.31_1206959	armHet	X	X2	TE	H
nw>contig10175|size289|read65|cov10.30_5890	armHet	X	X4	non-TE non-Satellite
nw>contig11397|size368|read96|cov12.30_196691	armHet	X	X4	non-TE non-Satellite
nw>contig11632|size432|read115|cov12.51_172805	armHet	X	X4	non-TE non-Satellite
nw>contig12822|size553|read139|cov11.88_11236	armHet	X	X4	non-TE non-Satellite
nw>contig13896|size390|read96|cov11.81_1791634	armHet	X	X4	non-TE non-Satellite
nw>contig13954|size536|read161|cov14.34_3521653	armHet	X	X4	non-TE non-Satellite
nw>contig14055|size306|read64|cov9.97_401693	armHet	X	X4	non-TE non-Satellite
nw>contig14195|size121|read24|cov9.95_421743	armHet	X	X4	non-TE non-Satellite
nw>contig17426|size240|read52|cov10.47_52906	armHet	X	X4	non-TE non-Satellite
nw>contig17571|size138|read34|cov11.87_362948	armHet	X	X4	non-TE non-Satellite
nw>contig17583|size280|read86|cov14.78_142954	armHet	X	X4	non-TE non-Satellite
nw>contig17905|size323|read64|cov9.54_393059	armHet	X	X4	non-TE non-Satellite
nw>contig19234|size319|read69|cov9.93_863480	armHet	X	X4	non-TE non-Satellite
nw>contig20277|size448|read83|cov9.15_2303786	armHet	X	X4	non-TE non-Satellite
nw>contig20403|size559|read168|cov14.49_3433829	armHet	X	X4	non-TE non-Satellite
nw>contig24526|size102|read23|cov10.58_304937	armHet	X	X4	non-TE non-Satellite
nw>contig25087|size141|read24|cov8.36_75075	armHet	X	X4	non-TE non-Satellite
nw>contig4189|size120|read21|cov8.05_168083	armHet	X	X4	non-TE non-Satellite
nw>contig5130|size658|read195|cov14.01_5308900	armHet	X	X4	non-TE non-Satellite
nw>contig54963|size147|read36|cov12.24_389204	armHet	X	X4	non-TE non-Satellite
nw>contig7944|size546|read181|cov15.85_21710838	armHet	X	X4	non-TE non-Satellite
nw>contig8280|size249|read45|cov8.38_7211036	armHet	X	X4	non-TE non-Satellite
nw>contig9248|size368|read94|cov12.07_21111550	armHet	X	X4	non-TE non-Satellite
R7478|size179	armHet	X	X4	non-TE non-Satellite
ru>contig7478|size834|read397|cov20.98_21179	armHet	X	X4	non-TE non-Satellite
nw>contig10966|size82|read15|cov9.01_2474	armHet	X	X4	TE	diver2
nw>contig12242|size200|read51|cov12.37_481032	armHet	X	X4	TE	Cr1a
nw>contig13671|size109|read26|cov11.66_341555	armHet	X	X4	TE	BS
nw>contig15778|size293|read54|cov9.04_502332	armHet	X	X4	TE	INE-1
nw>contig43528|size151|read29|cov8.76_28241	armHet	X	X4	TE	INE-1
nw>contig53833|size110|read25|cov11.01_99118	armHet	X	X4	TE	R1-element
nw>contig15858|size507|read139|cov12.92_342360	armHet	X	Xn	non-TE non-Satellite
nw>contig18600|size170|read35|cov9.45_393293	armHet	X	Xn	non-TE non-Satellite
nw>contig23831|size288|read80|cov12.98_954768	armHet	X	Xn	non-TE non-Satellite
nw>contig36741|size135|read23|cov8.36_347360	armHet	X	Xn	TE	INE-1
nw>contig37038|size98|read20|cov9.89_247407	armHet	X	Xn	TE	G
nw>contig41657|size95|read19|cov9.24_348054	armHet	X	Xn	TE	G
nw>contig12506|size103|read22|cov9.78_51120	armHet	Y	XY	non-TE non-Satellite
nw>contig17814|size156|read28|cov8.80_53022	armHet	Y	XY	non-TE non-Satellite
nw>contig22603|size120|read26|cov10.39_494426	armHet	Y	XY	non-TE non-Satellite
nw>contig20069|size289|read53|cov8.83_53734	armHet	Y	XY	rDNA	rDNA
nw>contig10195|size124|read60|cov22.20_0101	armHet	Y	XY	Satellite	356bp
nw>contig12704|size77|read16|cov10.45_101201	armHet	Y	XY	Satellite	356bp
nw>contig12884|size86|read30|cov16.21_11258	armHet	Y	XY	Satellite	359bp
nw>contig1370|size119|read118|cov46.94_01570	armHet	Y	XY	Satellite	359bp
nw>contig16194|size121|read29|cov10.94_162483	armHet	Y	XY	TE	ninja-Dsim-like
nw>contig18519|size179|read46|cov12.48_843268	armHet	Y	XY	TE	TART-A
nw>contig17526|size75|read15|cov9.13_02932	armHet	Y	Y	TE	NOF
nw>contig35474|size87|read17|cov9.16_257159	armHet	Y	Y	TE	Rt1b
nw>contig36674|size162|read30|cov8.47_17346	armHet	Y	Y	TE	Rt1b
nw>contig37124|size96|read16|cov8.02_77425	armHet	Y	Y	TE	BS3
nw>contig10282|size87|read72|cov29.75_926	armU/Uextra	2CEN	2CEN	non-TE non-Satellite
nw>contig13255|size146|read149|cov36.62_16270	armU/Uextra	2CEN	2CEN	non-TE non-Satellite
nw>contig19543|size109|read67|cov22.03_25637	armU/Uextra	2CEN	2CEN	non-TE non-Satellite
nw>contig7563|size93|read68|cov26.20_141472	armU/Uextra	2CEN	2CEN	non-TE non-Satellite
nw>contig7633|size197|read114|cov22.09_191477	armU/Uextra	2CEN	2CEN	non-TE non-Satellite
R5204|size148	armU/Uextra	2CEN	2CEN	non-TE non-Satellite
nw>contig13731|size222|read173|cov29.46_142307	armU/Uextra	2CEN	2CEN	TE	gypsy10
nw>contig14302|size73|read48|cov24.36_13341	armU/Uextra	2CEN	2CEN	TE	transib2
nw>contig33417|size70|read17|cov11.10_06828	armU/Uextra	2CEN	2CEN	TE	mdg1
nw>contig35523|size70|read15|cov9.34_27170	armU/Uextra	2CEN	2CEN	TE	Rt1b
nw>contig5769|size88|read101|cov42.68_271303	armU/Uextra	2CEN	2CEN	TE	I
nw>contig6564|size102|read69|cov25.35_251378	armU/Uextra	2CEN	2CEN	TE	Circe
nw>contig68900|size79|read41|cov20.11_191402	armU/Uextra	2CEN	2CEN	TE	gypsy5
nw>contig10043|size78|read70|cov31.28_45	armU/Uextra	2CEN	2R1	Satellite	Rsp_element_segment1
nw>contig14950|size71|read44|cov22.31_8383	armU/Uextra	2CEN	2R1	Satellite	Rsp_element_segment1
nw>contig18316|size70|read52|cov26.80_10574	armU/Uextra	2CEN	2R1	Satellite	Rsp_element_segment1
nw>contig18619|size71|read71|cov26.11_7597	armU/Uextra	2CEN	2R1	Satellite	Rsp_element_segment1
nw>contig21995|size84|read60|cov26.31_19745	armU/Uextra	2CEN	2R1	Satellite	Rsp_element_segment1
nw>contig23924|size84|read47|cov20.50_22797	armU/Uextra	2CEN	2R1	Satellite	Rsp_element_segment1
nw>contig25600|size92|read79|cov32.23_3847	armU/Uextra	2CEN	2R1	Satellite	Rsp_element_segment1
nw>contig27064|size123|read79|cov23.06_24889	armU/Uextra	2CEN	2R1	Satellite	Rsp_element_segment1
nw>contig3366|size86|read198|cov78.92_251025	armU/Uextra	2CEN	2R1	Satellite	Rsp_element_segment1
nw>contig3577|size83|read83|cov38.53_171055	armU/Uextra	2CEN	2R1	Satellite	Rsp_element_segment1
nw>contig7086|size73|read61|cov32.36_121424	armU/Uextra	2CEN	2R1	Satellite	Rsp_element_segment1
nw>contig10047|size594|read416|cov25.80_2106	armU/Uextra	2CEN	2R2	non-TE non-Satellite
nw>contig10532|size240|read140|cov21.30_14543	armU/Uextra	2CEN	2R2	non-TE non-Satellite
nw>contig10782|size429|read234|cov20.16_6761	armU/Uextra	2CEN	2R2	non-TE non-Satellite
nw>contig11112|size655|read357|cov20.72_54093	armU/Uextra	2CEN	2R2	non-TE non-Satellite
nw>contig11298|size836|read543|cov24.70_190109	armU/Uextra	2CEN	2R2	non-TE non-Satellite
nw>contig11632|size1147|read675|cov22.08_597136	armU/Uextra	2CEN	2R2	non-TE non-Satellite
nw>contig11687|size1946|read1148|cov21.97_1314142	armU/Uextra	2CEN	2R2	non-TE non-Satellite
nw>contig11997|size144|read119|cov30.74_50167	armU/Uextra	2CEN	2R2	non-TE non-Satellite
nw>contig12144|size231|read224|cov35.87_158179	armU/Uextra	2CEN	2R2	non-TE non-Satellite
nw>contig12504|size1734|read1011|cov21.79_1079206	armU/Uextra	2CEN	2R2	non-TE non-Satellite
nw>contig12671|size1270|read736|cov21.40_1176220	armU/Uextra	2CEN	2R2	non-TE non-Satellite
nw>contig12678|size173|read95|cov20.51_29222	armU/Uextra	2CEN	2R2	non-TE non-Satellite
nw>contig13035|size197|read172|cov32.26_84250	armU/Uextra	2CEN	2R2	non-TE non-Satellite
nw>contig13295|size473|read494|cov39.82_82275	armU/Uextra	2CEN	2R2	non-TE non-Satellite
nw>contig13916|size196|read254|cov47.18_47316	armU/Uextra	2CEN	2R2	non-TE non-Satellite
nw>contig14004|size665|read402|cov22.14_474321	armU/Uextra	2CEN	2R2	non-TE non-Satellite
nw>contig14488|size236|read186|cov29.11_96353	armU/Uextra	2CEN	2R2	non-TE non-Satellite
nw>contig14497|size683|read412|cov22.48_235354	armU/Uextra	2CEN	2R2	non-TE non-Satellite
nw>contig14770|size288|read307|cov39.70_115370	armU/Uextra	2CEN	2R2	non-TE non-Satellite
nw>contig15313|size734|read402|cov21.08_533403	armU/Uextra	2CEN	2R2	non-TE non-Satellite
nw>contig15708|size110|read73|cov24.65_18428	armU/Uextra	2CEN	2R2	non-TE non-Satellite
nw>contig15758|size201|read169|cov31.19_119435	armU/Uextra	2CEN	2R2	non-TE non-Satellite
nw>contig15811|size171|read123|cov28.12_75438	armU/Uextra	2CEN	2R2	non-TE non-Satellite
nw>contig15921|size80|read61|cov28.07_0446	armU/Uextra	2CEN	2R2	non-TE non-Satellite
nw>contig15931|size819|read452|cov20.74_610448	armU/Uextra	2CEN	2R2	non-TE non-Satellite
nw>contig16578|size84|read51|cov22.18_1482	armU/Uextra	2CEN	2R2	non-TE non-Satellite
nw>contig16919|size585|read313|cov20.10_345501	armU/Uextra	2CEN	2R2	non-TE non-Satellite
nw>contig16944|size474|read469|cov37.10_411502	armU/Uextra	2CEN	2R2	non-TE non-Satellite
nw>contig17114|size398|read228|cov21.06_68514	armU/Uextra	2CEN	2R2	non-TE non-Satellite
nw>contig17336|size993|read568|cov21.19_899525	armU/Uextra	2CEN	2R2	non-TE non-Satellite
nw>contig17757|size425|read255|cov22.11_131544	armU/Uextra	2CEN	2R2	non-TE non-Satellite
nw>contig18539|size114|read79|cov25.82_46589	armU/Uextra	2CEN	2R2	non-TE non-Satellite
nw>contig18564|size226|read133|cov20.95_125591	armU/Uextra	2CEN	2R2	non-TE non-Satellite
nw>contig18679|size172|read143|cov30.76_61605	armU/Uextra	2CEN	2R2	non-TE non-Satellite
nw>contig18730|size516|read512|cov37.61_259608	armU/Uextra	2CEN	2R2	non-TE non-Satellite
nw>contig18808|size264|read234|cov32.72_187614	armU/Uextra	2CEN	2R2	non-TE non-Satellite
nw>contig18828|size120|read65|cov20.77_49615	armU/Uextra	2CEN	2R2	non-TE non-Satellite
nw>contig19178|size124|read72|cov22.10_0627	armU/Uextra	2CEN	2R2	non-TE non-Satellite
nw>contig19595|size90|read55|cov21.34_21641	armU/Uextra	2CEN	2R2	non-TE non-Satellite
nw>contig19685|size473|read272|cov21.15_224646	armU/Uextra	2CEN	2R2	non-TE non-Satellite
nw>contig19734|size703|read395|cov21.37_202648	armU/Uextra	2CEN	2R2	non-TE non-Satellite
nw>contig19770|size965|read611|cov23.52_415650	armU/Uextra	2CEN	2R2	non-TE non-Satellite
nw>contig21112|size561|read355|cov23.50_416703	armU/Uextra	2CEN	2R2	non-TE non-Satellite
nw>contig21243|size253|read214|cov32.00_0709	armU/Uextra	2CEN	2R2	non-TE non-Satellite
nw>contig21279|size82|read75|cov33.35_3712	armU/Uextra	2CEN	2R2	non-TE non-Satellite
nw>contig21408|size718|read399|cov20.51_408719	armU/Uextra	2CEN	2R2	non-TE non-Satellite
nw>contig23288|size260|read157|cov22.23_46777	armU/Uextra	2CEN	2R2	non-TE non-Satellite
nw>contig23893|size527|read286|cov20.07_362795	armU/Uextra	2CEN	2R2	non-TE non-Satellite
nw>contig24444|size147|read95|cov23.89_39816	armU/Uextra	2CEN	2R2	non-TE non-Satellite
nw>contig25264|size129|read79|cov23.59_19840	armU/Uextra	2CEN	2R2	non-TE non-Satellite
nw>contig25941|size131|read85|cov22.48_54859	armU/Uextra	2CEN	2R2	non-TE non-Satellite
nw>contig26433|size132|read80|cov22.37_2874	armU/Uextra	2CEN	2R2	non-TE non-Satellite
nw>contig27651|size231|read136|cov21.67_113907	armU/Uextra	2CEN	2R2	non-TE non-Satellite
nw>contig28410|size133|read83|cov22.11_32923	armU/Uextra	2CEN	2R2	non-TE non-Satellite
nw>contig30014|size144|read110|cov28.33_81954	armU/Uextra	2CEN	2R2	non-TE non-Satellite
nw>contig31397|size195|read138|cov25.82_115986	armU/Uextra	2CEN	2R2	non-TE non-Satellite
nw>contig32574|size200|read114|cov21.58_871003	armU/Uextra	2CEN	2R2	non-TE non-Satellite
nw>contig33119|size191|read144|cov28.52_321012	armU/Uextra	2CEN	2R2	non-TE non-Satellite
nw>contig33260|size82|read60|cov26.24_161016	armU/Uextra	2CEN	2R2	non-TE non-Satellite
nw>contig33264|size141|read78|cov20.62_91017	armU/Uextra	2CEN	2R2	non-TE non-Satellite
nw>contig35414|size101|read54|cov20.39_401049	armU/Uextra	2CEN	2R2	non-TE non-Satellite
nw>contig4043|size713|read515|cov26.93_3771125	armU/Uextra	2CEN	2R2	non-TE non-Satellite
nw>contig4790|size101|read98|cov36.25_221206	armU/Uextra	2CEN	2R2	non-TE non-Satellite
nw>contig4843|size185|read218|cov44.11_1251211	armU/Uextra	2CEN	2R2	non-TE non-Satellite
nw>contig50905|size320|read185|cov21.36_2071235	armU/Uextra	2CEN	2R2	non-TE non-Satellite
nw>contig51517|size117|read71|cov22.06_161243	armU/Uextra	2CEN	2R2	non-TE non-Satellite
nw>contig6196|size652|read419|cov23.61_5141347	armU/Uextra	2CEN	2R2	non-TE non-Satellite
nw>contig7233|size79|read58|cov27.37_11438	armU/Uextra	2CEN	2R2	non-TE non-Satellite
nw>contig7485|size395|read345|cov33.10_01462	armU/Uextra	2CEN	2R2	non-TE non-Satellite
nw>contig7826|size398|read334|cov31.28_3341499	armU/Uextra	2CEN	2R2	non-TE non-Satellite
nw>contig7872|size162|read177|cov42.09_761504	armU/Uextra	2CEN	2R2	non-TE non-Satellite
nw>contig8119|size269|read282|cov39.39_31534	armU/Uextra	2CEN	2R2	non-TE non-Satellite
nw>contig8927|size408|read221|cov20.18_721598	armU/Uextra	2CEN	2R2	non-TE non-Satellite
nw>contig8955|size117|read88|cov28.12_251603	armU/Uextra	2CEN	2R2	non-TE non-Satellite
nw>contig8999|size832|read1012|cov44.92_3411607	armU/Uextra	2CEN	2R2	non-TE non-Satellite
nw>contig9405|size591|read447|cov28.17_3121641	armU/Uextra	2CEN	2R2	non-TE non-Satellite
nw>contig9450|size346|read192|cov20.56_2201644	armU/Uextra	2CEN	2R2	non-TE non-Satellite
nw>contig9689|size190|read180|cov35.34_251665	armU/Uextra	2CEN	2R2	non-TE non-Satellite
R971|size9129	armU/Uextra	2CEN	2R2	non-TE non-Satellite
nw>contig13179|size115|read72|cov23.03_39264	armU/Uextra	2CEN	2R2	Satellite	Rsp_element_segment1
nw>contig16557|size81|read55|cov23.91_13481	armU/Uextra	2CEN	2R2	Satellite	Rsp_element_segment1
nw>contig19436|size169|read141|cov31.24_92634	armU/Uextra	2CEN	2R2	Satellite	Rsp_element_segment1
nw>contig26971|size269|read136|cov20.00_146886	armU/Uextra	2CEN	2R2	Satellite	Rsp_element_segment1
nw>contig9287|size223|read260|cov43.26_1161632	armU/Uextra	2CEN	2R2	Satellite	Rsp_element_segment1
nw>contig11184|size171|read132|cov28.83_100103	armU/Uextra	2CEN	2R2	TE	Idefix
nw>contig14305|size104|read97|cov34.41_29342	armU/Uextra	2CEN	2R2	TE	Tc1
nw>contig15046|size162|read160|cov39.47_20387	armU/Uextra	2CEN	2R2	TE	INE-1
nw>contig17941|size137|read90|cov23.70_11559	armU/Uextra	2CEN	2R2	TE	Idefix
nw>contig18578|size168|read144|cov31.73_87593	armU/Uextra	2CEN	2R2	TE	rooA
nw>contig23324|size96|read83|cov32.82_7779	armU/Uextra	2CEN	2R2	TE	Bari1
nw>contig23619|size114|read75|cov24.33_15786	armU/Uextra	2CEN	2R2	TE	1360
nw>contig25123|size83|read66|cov28.70_9836	armU/Uextra	2CEN	2R2	TE	G3
nw>contig29574|size119|read65|cov20.11_14944	armU/Uextra	2CEN	2R2	TE	G4
nw>contig35643|size113|read69|cov21.96_471051	armU/Uextra	2CEN	2R2	TE	Porto1
nw>contig40591|size96|read54|cov22.82_221127	armU/Uextra	2CEN	2R2	TE	rooA
nw>contig42122|size149|read86|cov21.56_851145	armU/Uextra	2CEN	2R2	TE	INE-1
nw>contig6671|size103|read58|cov21.83_241383	armU/Uextra	2CEN	2R2	TE	transib2
nw>contig6944|size120|read123|cov37.71_21408	armU/Uextra	2CEN	2R2	TE	INE-1
nw>contig9166|size163|read190|cov43.36_241623	armU/Uextra	2CEN	2R2	TE	Porto1
nw>contig11115|size1629|read964|cov22.24_60494	armU/Uextra	2CEN	2R3	non-TE non-Satellite
nw>contig25573|size623|read373|cov22.37_187845	armU/Uextra	2CEN	2R3	non-TE non-Satellite
nw>contig26080|size502|read288|cov21.32_52863	armU/Uextra	2CEN	2R3	non-TE non-Satellite
nw>contig50705|size176|read115|cov25.24_81232	armU/Uextra	2CEN	2R3	TE	gypsy4
nw>contig11903|size842|read895|cov39.19_284160	armU/Uextra	2CEN	2R4	non-TE non-Satellite
nw>contig12139|size310|read169|cov20.65_226178	armU/Uextra	2CEN	2R4	non-TE non-Satellite
nw>contig12473|size1426|read798|cov20.92_50201	armU/Uextra	2CEN	2R4	non-TE non-Satellite
nw>contig13140|size88|read60|cov24.49_5260	armU/Uextra	2CEN	2R4	non-TE non-Satellite
nw>contig13299|size358|read217|cov22.37_171277	armU/Uextra	2CEN	2R4	non-TE non-Satellite
nw>contig14156|size607|read366|cov22.55_539332	armU/Uextra	2CEN	2R4	non-TE non-Satellite
nw>contig14709|size431|read278|cov23.90_101368	armU/Uextra	2CEN	2R4	non-TE non-Satellite
nw>contig15550|size714|read389|cov20.18_363417	armU/Uextra	2CEN	2R4	non-TE non-Satellite
nw>contig15681|size922|read501|cov20.03_228425	armU/Uextra	2CEN	2R4	non-TE non-Satellite
nw>contig16137|size854|read496|cov21.43_566457	armU/Uextra	2CEN	2R4	non-TE non-Satellite
nw>contig18405|size1283|read727|cov21.40_701581	armU/Uextra	2CEN	2R4	non-TE non-Satellite
nw>contig19574|size894|read483|cov20.21_810640	armU/Uextra	2CEN	2R4	non-TE non-Satellite
nw>contig20946|size329|read323|cov37.06_87693	armU/Uextra	2CEN	2R4	non-TE non-Satellite
nw>contig21346|size174|read131|cov27.93_111715	armU/Uextra	2CEN	2R4	non-TE non-Satellite
nw>contig21764|size135|read83|cov22.36_40739	armU/Uextra	2CEN	2R4	non-TE non-Satellite
nw>contig27414|size100|read57|cov20.89_32901	armU/Uextra	2CEN	2R4	non-TE non-Satellite
nw>contig29808|size318|read176|cov20.99_193947	armU/Uextra	2CEN	2R4	non-TE non-Satellite
nw>contig32032|size148|read94|cov22.28_14994	armU/Uextra	2CEN	2R4	non-TE non-Satellite
nw>contig33615|size200|read126|cov23.50_471023	armU/Uextra	2CEN	2R4	non-TE non-Satellite
nw>contig37136|size624|read336|cov20.02_1241075	armU/Uextra	2CEN	2R4	non-TE non-Satellite
nw>contig37963|size404|read216|cov20.37_911079	armU/Uextra	2CEN	2R4	non-TE non-Satellite
nw>contig5008|size568|read1288|cov83.59_191222	armU/Uextra	2CEN	2R4	non-TE non-Satellite
nw>contig5067|size205|read459|cov82.59_11230	armU/Uextra	2CEN	2R4	non-TE non-Satellite
nw>contig5493|size179|read357|cov73.03_541275	armU/Uextra	2CEN	2R4	non-TE non-Satellite
nw>contig5636|size164|read283|cov64.34_571289	armU/Uextra	2CEN	2R4	non-TE non-Satellite
nw>contig5708|size1155|read1406|cov45.26_5761294	armU/Uextra	2CEN	2R4	non-TE non-Satellite
nw>contig5799|size813|read442|cov20.70_4921305	armU/Uextra	2CEN	2R4	non-TE non-Satellite
nw>contig7260|size1187|read1268|cov40.07_1341442	armU/Uextra	2CEN	2R4	non-TE non-Satellite
nw>contig7516|size108|read132|cov45.48_481466	armU/Uextra	2CEN	2R4	non-TE non-Satellite
nw>contig7843|size1307|read779|cov22.06_11771500	armU/Uextra	2CEN	2R4	non-TE non-Satellite
nw>contig8116|size424|read252|cov22.13_1241533	armU/Uextra	2CEN	2R4	non-TE non-Satellite
nw>contig8122|size807|read469|cov21.23_7471535	armU/Uextra	2CEN	2R4	non-TE non-Satellite
nw>contig8285|size959|read1089|cov42.54_2161550	armU/Uextra	2CEN	2R4	non-TE non-Satellite
nw>contig8949|size1084|read618|cov21.58_8551601	armU/Uextra	2CEN	2R4	non-TE non-Satellite
nw>contig9089|size203|read227|cov42.32_921618	armU/Uextra	2CEN	2R4	non-TE non-Satellite
nw>contig9376|size617|read760|cov46.31_301639	armU/Uextra	2CEN	2R4	non-TE non-Satellite
nw>contig9976|size134|read193|cov54.31_01691	armU/Uextra	2CEN	2R4	non-TE non-Satellite
nw>contig15136|size321|read182|cov20.71_117394	armU/Uextra	2CEN	2R4	TE	Cr1a
nw>contig17802|size232|read181|cov29.32_101550	armU/Uextra	2CEN	2R4	TE	INE-1
nw>contig5552|size123|read167|cov48.79_291279	armU/Uextra	2CEN	2R4	TE	INE-1
nw>contig5847|size223|read424|cov69.73_1021310	armU/Uextra	2CEN	2R4	TE	FB
nw>contig6514|size717|read1013|cov53.61_341371	armU/Uextra	2CEN	2R5	TE	Cr1a
nw>contig18602|size120|read107|cov33.02_44596	armU/Uextra	2CEN	2R6	TE	1360
nw>contig22219|size109|read99|cov33.28_28754	armU/Uextra	2CEN	2R6	TE	INE-1
nw>contig5587|size160|read283|cov64.23_581284	armU/Uextra	2CEN	2R6	TE	gypsy6
nw>contig5756|size196|read286|cov54.36_1331301	armU/Uextra	2CEN	2R6	TE	INE-1
nw>contig10015|size90|read52|cov22.28_293	armU/Uextra	2CEN	2Rn	non-TE non-Satellite
nw>contig10983|size82|read49|cov22.85_2274	armU/Uextra	2CEN	2Rn	non-TE non-Satellite
nw>contig11366|size1252|read709|cov21.29_1080117	armU/Uextra	2CEN	2Rn	non-TE non-Satellite
nw>contig1285|size1545|read1050|cov32.00_1101251	armU/Uextra	2CEN	2Rn	non-TE non-Satellite
nw>contig12940|size175|read105|cov21.93_71240	armU/Uextra	2CEN	2Rn	non-TE non-Satellite
nw>contig16928|size302|read61|cov9.85_972731	armU/Uextra	2CEN	2Rn	non-TE non-Satellite
nw>contig19313|size221|read122|cov20.11_41629	armU/Uextra	2CEN	2Rn	non-TE non-Satellite
nw>contig19915|size745|read409|cov20.05_468655	armU/Uextra	2CEN	2Rn	non-TE non-Satellite
nw>contig24113|size287|read170|cov22.46_117803	armU/Uextra	2CEN	2Rn	non-TE non-Satellite
nw>contig3992|size171|read90|cov24.90_87861	armU/Uextra	2CEN	2Rn	non-TE non-Satellite
nw>contig42678|size207|read38|cov8.56_18157	armU/Uextra	2CEN	2Rn	non-TE non-Satellite
nw>contig44363|size88|read65|cov27.75_141179	armU/Uextra	2CEN	2Rn	non-TE non-Satellite
[truncated: 7,923 more rows]
