# Supplementary material for: Mapping the pericentric heterochromatin by comparative genomic hybridization analysis and chromosome deletions in Drosophila melanogaster
Source: HighWire-hosted journal article supplement (doi:10.1101/gr.137406.112), 2012-06-28
Supplement: Supplemental_Table_4-Mapping_assignment_of_U_contigs.xlsx [file Supplemental_Table_4-Mapping_assignment_of_U_contigs.xlsx]

## Sheet: Sheet1
ContigID	Start	End	Length	Map	Category
1	1	325170	325169	unmappable	disagree
2	325272	429354	104082	3R	mapped
3	442356	543815	101459	unmappable	disagree
4	543917	639309	95392	unmappable	disagree
5	639411	643177	3766	unmappable	no match
6	646922	653600	6678	unmappable	no match
7	656556	694790	38234	unmappable	no match
8	815792	846395	30603	unmappable	no match
9	849397	900714	51317	3CEN	perfectly mapped
10	900816	964236	63420	unmappable	disagree
11	964338	1024355	60017	X	mapped
12	1027454	1041768	14314	3CEN	perfectly mapped
13	1041870	1109368	67498	2R4	perfectly mapped
14	1131370	1221379	90009	2R4	perfectly mapped
15	1222531	1298196	75665	2R	mapped
16	1303198	1413302	110104	2R4	perfectly mapped
17	1413404	1487971	74567	unmappable	disagree
18	1488073	1507916	19843	unmappable	no match
19	1510374	1516292	5918	unmappable	no match
20	1516928	1542708	25780	unmappable	no match
21	1542810	1616399	73589	unmappable	disagree
22	1616501	1680131	63630	3R	mapped
23	1680233	1684240	4007	unmappable	no match
24	1690435	1740850	50415	Y	perfectly mapped
25	1740952	1798146	57194	unmappable	disagree
26	1798248	1805810	7562	3CEN	perfectly mapped
27	1805832	1887052	81220	unmappable	disagree
28	1892054	1893435	1381	unmappable	no match
29	1893537	1942121	48584	unmappable	no match
30	1942223	1988192	45969	2R5	perfectly mapped
31	1988294	2048118	59824	3CEN	perfectly mapped
32	2048220	2097753	49533	unmappable	disagree
33	2097855	2148936	51081	Y	perfectly mapped
34	2149038	2199661	50623	XY	mapped
35	2199763	2253957	54194	3R	mapped
36	2254059	2255092	1033	3CEN	perfectly mapped
37	2255890	2257165	1275	3CEN	perfectly mapped
38	2266052	2272655	6603	3CEN	perfectly mapped
39	2276315	2279719	3404	3CEN	perfectly mapped
40	2285840	2293359	7519	3CEN	perfectly mapped
41	2293461	2332370	38909	unmappable	no match
42	2332472	2341086	8614	unmappable	disagree
43	2341108	2342536	1428	unmappable	no match
44	2342869	2343991	1122	unmappable	no match
45	2347624	2360540	12916	3CEN	perfectly mapped
46	2360562	2361697	1135	unmappable	no match
47	2367950	2370578	2628	3CEN	perfectly mapped
48	2370680	2375569	4889	Y	perfectly mapped
49	2384506	2387339	2833	Y	perfectly mapped
50	2387889	2389024	1135	Y	perfectly mapped
51	2394403	2395439	1036	unmappable	no match
52	2395461	2397275	1814	unmappable	no match
53	2403497	2407591	4094	unmappable	no match
54	2407693	2443344	35651	2R	mapped
55	2443446	2446257	2811	3CEN	perfectly mapped
56	2446541	2447189	648	unmappable	no match
57	2451472	2455897	4425	3CEN	perfectly mapped
58	2459833	2477706	17873	unmappable	disagree
59	2477808	2481588	3780	unmappable	no match
60	2488556	2492920	4364	unmappable	no match
61	2496678	2499203	2525	unmappable	no match
62	2499225	2500265	1040	unmappable	no match
63	2500287	2504651	4364	unmappable	no match
64	2510159	2511588	1429	unmappable	no match
65	2511690	2515616	3926	unmappable	disagree
66	2521644	2522794	1150	unmappable	disagree
67	2523209	2524517	1308	unmappable	disagree
68	2530557	2534799	4242	unmappable	disagree
69	2540476	2545361	4885	unmappable	disagree
70	2545463	2547875	2412	unmappable	no match
71	2549499	2554461	4962	XY	perfectly mapped
72	2554483	2555771	1288	unmappable	no match
73	2556093	2557161	1068	unmappable	no match
74	2558289	2559351	1062	unmappable	no match
75	2560676	2561724	1048	unmappable	no match
76	2561746	2575964	14218	unmappable	no match
77	2576066	2577243	1177	unmappable	no match
78	2577265	2578751	1486	unmappable	no match
79	2578773	2580002	1229	unmappable	no match
80	2580024	2582378	2354	unmappable	no match
81	2582414	2585121	2707	unmappable	no match
82	2589830	2592417	2587	unmappable	no match
83	2600134	2605380	5246	unmappable	no match
84	2605482	2607920	2438	unmappable	no match
85	2607942	2624690	16748	unmappable	disagree
86	2633080	2634271	1191	3L	perfectly mapped
87	2634373	2641115	6742	2R2	perfectly mapped
88	2644274	2662986	18712	2R2	perfectly mapped
89	2663088	2667215	4127	unmappable	no match
90	2672816	2678732	5916	XY	mapped
91	2683301	2691670	8369	XY	perfectly mapped
92	2691772	2708536	16764	unmappable	disagree
93	2708558	2710902	2344	unmappable	no match
94	2711770	2719705	7935	unmappable	disagree
95	2719807	2720825	1018	3CEN	perfectly mapped
96	2728106	2729175	1069	3CEN	perfectly mapped
97	2729493	2736175	6682	3CEN	perfectly mapped
98	2736197	2737422	1225	3CEN	perfectly mapped
99	2738353	2747598	9245	3CEN	perfectly mapped
100	2747700	2769262	21562	unmappable	no match
101	2769364	2781022	11658	unmappable	no match
102	2781124	2783832	2708	unmappable	no match
103	2789675	2791027	1352	unmappable	no match
104	2791442	2793983	2541	unmappable	no match
105	2794388	2799676	5288	unmappable	no match
106	2800568	2803316	2748	unmappable	no match
107	2807650	2808740	1090	unmappable	no match
108	2808842	2810461	1619	unmappable	no match
109	2810652	2813935	3283	unmappable	no match
110	2817983	2824710	6727	unmappable	no match
111	2830953	2836298	5345	4	perfectly mapped
112	2836400	2840106	3706	unmappable	no match
113	2842020	2842721	701	unmappable	no match
114	2844759	2857848	13089	unmappable	no match
115	2860977	2863258	2281	unmappable	no match
116	2863360	2868268	4908	Y	perfectly mapped
117	2870178	2874979	4801	Y	perfectly mapped
118	2875001	2880255	5254	3R	perfectly mapped
119	2881078	2885061	3983	unmappable	no match
120	2885154	2888073	2919	Y	perfectly mapped
121	2888124	2889639	1515	unmappable	no match
122	2889741	2895756	6015	unmappable	no match
123	2899781	2905460	5679	unmappable	no match
124	2912770	2915537	2767	3CEN	mapped
125	2915639	2918927	3288	Y	perfectly mapped
126	2918949	2921329	2380	Y	perfectly mapped
127	2926216	2931342	5126	Y	mapped
128	2937455	2941064	3609	unmappable	disagree
129	2941166	2946399	5233	X	mapped
130	2950224	2958251	8027	X4	perfectly mapped
131	2960215	2966555	6340	X4	perfectly mapped
132	2966657	2968107	1450	unmappable	no match
133	2976283	2981676	5393	unmappable	no match
134	2985088	2991876	6788	unmappable	no match
135	2991978	2997183	5205	2R2	perfectly mapped
136	3002185	3014306	12121	unmappable	disagree
137	3014408	3016354	1946	unmappable	no match
138	3017572	3020055	2483	unmappable	no match
139	3020077	3026764	6687	3CEN	perfectly mapped
140	3026786	3031606	4820	unmappable	no match
141	3033876	3039320	5444	unmappable	no match
142	3039422	3040701	1279	unmappable	no match
143	3041062	3043285	2223	unmappable	no match
144	3051451	3054709	3258	unmappable	no match
145	3061224	3064061	2837	unmappable	no match
146	3064163	3066373	2210	unmappable	no match
147	3066474	3080617	14143	3CEN	perfectly mapped
148	3083569	3088601	5032	unmappable	no match
149	3088703	3091288	2585	X3/X4	perfectly mapped
150	3096182	3103561	7379	X3/X4	perfectly mapped
151	3107658	3113017	5359	X3/X4	perfectly mapped
152	3113119	3122430	9311	unmappable	disagree
153	3122872	3137315	14443	X	mapped
154	3137417	3161316	23899	3CEN	perfectly mapped
155	3161418	3163603	2185	unmappable	no match
156	3171431	3176386	4955	unmappable	no match
157	3181737	3183939	2202	unmappable	no match
158	3184041	3186711	2670	unmappable	no match
159	3193276	3195847	2571	unmappable	no match
160	3205155	3206216	1061	Y	perfectly mapped
161	3206318	3207631	1313	unmappable	no match
162	3215484	3218122	2638	unmappable	no match
163	3226848	3227949	1101	unmappable	no match
164	3228051	3249266	21215	2R2	perfectly mapped
165	3249368	3250822	1454	unmappable	no match
166	3259167	3262863	3696	unmappable	no match
167	3269205	3270696	1491	unmappable	no match
168	3270798	3272647	1849	unmappable	no match
169	3279095	3283924	4829	Y	perfectly mapped
170	3290210	3291931	1721	Y	perfectly mapped
171	3292033	3312617	20584	2R2	perfectly mapped
172	3312719	3317953	5234	unmappable	no match
173	3326534	3330082	3548	unmappable	no match
174	3330262	3333135	2873	XY	perfectly mapped
175	3333237	3352735	19498	2L	perfectly mapped
176	3352837	3358344	5507	3CEN	perfectly mapped
177	3358366	3360769	2403	3CEN	perfectly mapped
178	3365232	3372264	7032	unmappable	no match
179	3372366	3373396	1030	unmappable	no match
180	3381911	3383892	1981	unmappable	no match
181	3383914	3389194	5280	unmappable	no match
182	3389216	3391765	2549	3CEN	perfectly mapped
183	3391867	3399851	7984	3R	perfectly mapped
184	3399873	3411158	11285	unmappable	no match
185	3411260	3430431	19171	2R1	perfectly mapped
186	3430533	3446089	15556	2R4	perfectly mapped
187	3446257	3449609	3352	2R4	perfectly mapped
188	3449711	3455496	5785	unmappable	no match
189	3462963	3465243	2280	unmappable	no match
190	3465265	3468533	3268	Y	perfectly mapped
191	3468635	3470259	1624	unmappable	no match
192	3470281	3472796	2515	unmappable	no match
193	3472818	3474783	1965	XY	perfectly mapped
194	3474860	3476828	1968	unmappable	no match
195	3476850	3483196	6346	X	perfectly mapped
196	3483239	3487211	3972	unmappable	no match
197	3487313	3498558	11245	3CEN	perfectly mapped
198	3500035	3505609	5574	3CEN	perfectly mapped
199	3505711	3512551	6840	unmappable	no match
200	3512755	3514532	1777	unmappable	no match
201	3520333	3522391	2058	3CEN	perfectly mapped
202	3522482	3523550	1068	XY	perfectly mapped
203	3523652	3529203	5551	unmappable	no match
204	3532037	3541455	9418	unmappable	no match
205	3541557	3559306	17749	unmappable	disagree
206	3559408	3561374	1966	unmappable	no match
207	3563191	3576940	13749	unmappable	disagree
208	3577042	3580259	3217	unmappable	no match
209	3588087	3590981	2894	unmappable	no match
210	3591365	3594427	3062	unmappable	no match
211	3594529	3596462	1933	unmappable	no match
212	3596484	3597876	1392	unmappable	no match
213	3597898	3598988	1090	unmappable	no match
214	3599743	3601353	1610	unmappable	no match
215	3607400	3611545	4145	2CEN	perfectly mapped
216	3611647	3618339	6692	unmappable	disagree
217	3622290	3628575	6285	3CEN	perfectly mapped
218	3628677	3631339	2662	unmappable	no match
219	3639936	3645430	5494	unmappable	no match
220	3645532	3652488	6956	X3/X4	perfectly mapped
221	3652692	3654031	1339	unmappable	disagree
222	3657213	3662231	5018	X4	perfectly mapped
223	3662333	3669127	6794	unmappable	no match
224	3676233	3677212	979	unmappable	no match
225	3677397	3678790	1393	unmappable	no match
226	3678892	3685500	6608	unmappable	disagree
227	3690889	3695332	4443	unmappable	no match
228	3695434	3701901	6467	unmappable	no match
229	3702299	3702942	643	unmappable	no match
230	3705996	3711516	5520	unmappable	disagree
231	3711618	3714192	2574	unmappable	no match
232	3721394	3722704	1310	unmappable	no match
233	3722766	3727586	4820	X2	perfectly mapped
234	3727688	3734399	6711	3CEN	perfectly mapped
235	3741551	3743602	2051	3CEN	perfectly mapped
236	3743704	3747961	4257	Y	perfectly mapped
237	3756823	3759514	2691	unmappable	no match
238	3759616	3764940	5324	unmappable	no match
239	3769906	3775178	5272	unmappable	no match
240	3775280	3776653	1373	unmappable	no match
241	3776900	3777737	837	unmappable	no match
242	3780152	3788762	8610	unmappable	no match
243	3788832	3790782	1950	unmappable	no match
244	3790884	3803919	13035	3CEN	perfectly mapped
245	3803941	3806299	2358	3CEN	perfectly mapped
246	3806401	3812204	5803	3CEN	perfectly mapped
247	3817937	3821803	3866	3CEN	perfectly mapped
248	3821905	3823525	1620	Y	perfectly mapped
249	3831813	3834477	2664	Y	perfectly mapped
250	3834644	3837233	2589	unmappable	no match
251	3837335	3841166	3831	unmappable	no match
252	3848054	3851248	3194	unmappable	no match
253	3851348	3852618	1270	unmappable	no match
254	3852720	3854786	2066	3CEN	perfectly mapped
255	3860843	3867870	7027	3CEN	perfectly mapped
256	3867972	3868511	539	unmappable	no match
257	3868533	3871997	3464	3R	mapped
258	3872551	3873276	725	unmappable	no match
259	3878398	3883036	4638	3CEN	perfectly mapped
260	3883138	3898092	14954	unmappable	disagree
261	3898194	3899224	1030	unmappable	no match
262	3899383	3902243	2860	unmappable	no match
263	3907338	3913057	5719	3CEN	perfectly mapped
264	3913159	3918650	5491	unmappable	no match
265	3922668	3924676	2008	XY	perfectly mapped
266	3924698	3928019	3321	XY	mapped
267	3928121	3933971	5850	unmappable	no match
268	3937713	3942902	5189	X4	perfectly mapped
269	3943004	3944602	1598	unmappable	no match
270	3944709	3946863	2154	unmappable	no match
271	3951962	3957644	5682	unmappable	no match
272	3957746	3961165	3419	Y	perfectly mapped
273	3968670	3972372	3702	Y	perfectly mapped
274	3972474	3977970	5496	3CEN	perfectly mapped
275	3982046	3986975	4929	3CEN	perfectly mapped
276	3987077	3991820	4743	unmappable	disagree
277	3998680	4001488	2808	3R	perfectly mapped
278	4001590	4002872	1282	unmappable	no match
279	4011706	4015749	4043	unmappable	no match
280	4015851	4017758	1907	Y	perfectly mapped
281	4022447	4029971	7524	Y	perfectly mapped
282	4030073	4031104	1031	unmappable	no match
283	4031354	4032540	1186	unmappable	no match
284	4038457	4044178	5721	unmappable	no match
285	4044280	4046480	2200	3CEN	perfectly mapped
286	4048094	4049109	1015	unmappable	no match
287	4049416	4051516	2100	unmappable	no match
288	4051538	4058376	6838	unmappable	no match
289	4058478	4062080	3602	unmappable	no match
290	4067544	4068405	861	unmappable	no match
291	4068892	4072504	3612	unmappable	no match
292	4072606	4075551	2945	unmappable	no match
293	4081351	4086544	5193	X3/X4	perfectly mapped
294	4086646	4092140	5494	unmappable	no match
295	4095170	4096148	978	unmappable	no match
296	4096288	4100579	4291	unmappable	no match
297	4100681	4103293	2612	XY	perfectly mapped
298	4111469	4114585	3116	3L	perfectly mapped
299	4114687	4116346	1659	unmappable	no match
300	4116368	4117555	1187	unmappable	no match
301	4124836	4126030	1194	unmappable	no match
302	4126239	4127471	1232	unmappable	no match
303	4127493	4128545	1052	unmappable	no match
304	4128647	4131791	3144	unmappable	no match
305	4139769	4142485	2716	unmappable	no match
306	4142587	4146516	3929	unmappable	disagree
307	4153651	4156315	2664	unmappable	disagree
308	4156417	4158729	2312	3CEN	perfectly mapped
309	4164522	4170021	5499	3CEN	perfectly mapped
310	4170123	4171200	1077	X2	perfectly mapped
311	4179302	4183670	4368	X2	perfectly mapped
312	4183772	4197295	13523	3R	perfectly mapped
313	4197397	4198469	1072	X4	perfectly mapped
314	4208189	4210916	2727	XY	mapped
315	4211018	4214083	3065	unmappable	no match
316	4220403	4224471	4068	unmappable	no match
317	4224573	4237987	13414	3CEN	perfectly mapped
318	4238089	4242023	3934	X3/X4	perfectly mapped
319	4248159	4249142	983	X4	perfectly mapped
320	4249395	4251481	2086	X3/X4	perfectly mapped
321	4251583	4253134	1551	Y	perfectly mapped
322	4261524	4264944	3420	unmappable	no match
323	4265046	4266451	1405	unmappable	no match
324	4273253	4274135	882	unmappable	no match
325	4274160	4278361	4201	unmappable	no match
326	4278463	4280237	1774	unmappable	no match
327	4288136	4291717	3581	unmappable	no match
328	4291819	4296572	4753	Y	perfectly mapped
329	4303798	4305070	1272	Y	perfectly mapped
330	4305172	4307337	2165	unmappable	no match
331	4314232	4318404	4172	X4	perfectly mapped
332	4318506	4323869	5363	X4	perfectly mapped
333	4328298	4331612	3314	3CEN	perfectly mapped
334	4331714	4334356	2642	unmappable	no match
335	4340387	4344773	4386	unmappable	no match
336	4344875	4346147	1272	unmappable	no match
337	4346281	4347362	1081	unmappable	no match
338	4353537	4354949	1412	unmappable	no match
339	4354989	4357781	2792	unmappable	no match
340	4357883	4359443	1560	X4	perfectly mapped
341	4359643	4360893	1250	unmappable	no match
342	4369544	4370729	1185	X3/X4	perfectly mapped
343	4370831	4371936	1105	unmappable	no match
344	4381249	4383656	2407	XY	perfectly mapped
345	4383758	4387956	4198	Y	perfectly mapped
346	4393186	4393699	513	unmappable	no match
347	4394082	4396471	2389	unmappable	no match
348	4396573	4397862	1289	unmappable	no match
349	4405794	4409285	3491	unmappable	no match
350	4409387	4410766	1379	unmappable	no match
351	4411370	4413102	1732	3CEN	perfectly mapped
352	4419437	4422039	2602	unmappable	no match
353	4422141	4423414	1273	unmappable	no match
354	4432380	4434771	2391	unmappable	no match
355	4434873	4436537	1664	X3/X4	perfectly mapped
356	4443729	4447407	3678	X	perfectly mapped
357	4447509	4449521	2012	X4	perfectly mapped
358	4457681	4460027	2346	X4	perfectly mapped
359	4460129	4461656	1527	unmappable	no match
360	4461678	4462871	1193	unmappable	no match
361	4469813	4472640	2827	Y	perfectly mapped
362	4472742	4481850	9108	2R2	perfectly mapped
363	4481915	4485164	3249	2R	mapped
364	4485266	4486400	1134	unmappable	no match
365	4494451	4497688	3237	unmappable	disagree
366	4497790	4500011	2221	unmappable	no match
367	4507522	4510187	2665	unmappable	no match
368	4510289	4512750	2461	3CEN	perfectly mapped
369	4521207	4522655	1448	unmappable	disagree
370	4522757	4524023	1266	unmappable	no match
371	4533167	4535109	1942	unmappable	no match
372	4535211	4536923	1712	unmappable	no match
373	4544470	4545888	1418	unmappable	no match
374	4545910	4547562	1652	unmappable	no match
375	4547664	4549078	1414	Y	perfectly mapped
376	4557154	4559947	2793	Y	perfectly mapped
377	4560049	4561536	1487	X3	perfectly mapped
378	4561669	4562824	1155	X3	perfectly mapped
379	4570344	4572234	1890	XY	perfectly mapped
380	4572336	4573601	1265	unmappable	no match
381	4581960	4584482	2522	Y	mapped
382	4584584	4586448	1864	unmappable	no match
383	4594393	4596724	2331	unmappable	no match
384	4596826	4597992	1166	unmappable	no match
385	4606196	4608919	2723	unmappable	no match
386	4609021	4611728	2707	3R	perfectly mapped
387	4619929	4621053	1124	unmappable	no match
388	4621155	4623331	2176	Y	perfectly mapped
389	4628823	4629848	1025	unmappable	no match
390	4629870	4633154	3284	unmappable	no match
391	4633256	4634291	1035	unmappable	no match
392	4643326	4645240	1914	unmappable	no match
393	4645342	4646865	1523	unmappable	no match
394	4655370	4657325	1955	3CEN	perfectly mapped
395	4657427	4660401	2974	2R2	perfectly mapped
396	4660473	4661602	1129	2R2	perfectly mapped
397	4667668	4669383	1715	unmappable	no match
398	4669485	4671285	1800	unmappable	no match
399	4678982	4681434	2452	unmappable	no match
400	4681536	4684567	3031	Y	perfectly mapped
401	4692119	4693277	1158	Y	perfectly mapped
402	4693379	4705073	11694	unmappable	disagree
403	4705175	4707369	2194	unmappable	no match
404	4714423	4715454	1031	unmappable	no match
405	4715619	4716797	1178	unmappable	no match
406	4716899	4718072	1173	X3/X4	perfectly mapped
407	4727388	4728419	1031	X4	perfectly mapped
408	4728521	4729777	1256	unmappable	no match
409	4738879	4740025	1146	unmappable	no match
410	4740127	4741331	1204	unmappable	no match
411	4750555	4751555	1000	2R5	perfectly mapped
412	4751657	4752744	1087	unmappable	no match
413	4761790	4762875	1085	unmappable	no match
414	4762977	4764374	1397	unmappable	no match
415	4772795	4774123	1328	unmappable	disagree
416	4774225	4775581	1356	unmappable	no match
417	4784277	4785349	1072	X3/X4	perfectly mapped
418	4785451	4786485	1034	unmappable	disagree
419	4786507	4799823	13316	unmappable	disagree
420	4800220	4807888	7668	unmappable	disagree
421	4812694	4818025	5331	unmappable	disagree
422	4824206	4825106	900	X1	perfectly mapped
423	4825448	4826475	1027	unmappable	disagree
424	4826577	4827756	1179	unmappable	no match
425	4827804	4831344	3540	unmappable	no match
426	4836773	4840972	4199	unmappable	no match
427	4847891	4851016	3125	unmappable	no match
428	4851038	4854031	2993	unmappable	no match
429	4854133	4855787	1654	unmappable	no match
430	4859854	4865975	6121	3CEN	perfectly mapped
431	4865997	4867369	1372	3CEN	perfectly mapped
432	4868135	4873513	5378	3CEN	perfectly mapped
433	4876660	4880110	3450	3CEN	perfectly mapped
434	4880212	4883194	2982	unmappable	no match
435	4883216	4884260	1044	unmappable	no match
436	4884819	4885900	1081	Y	perfectly mapped
437	4890538	4896013	5475	unmappable	no match
438	4896134	4900787	4653	Y	perfectly mapped
439	4901258	4902230	972	unmappable	no match
440	4902306	4906050	3744	unmappable	no match
441	4906152	4907233	1081	unmappable	no match
442	4907830	4912643	4813	unmappable	no match
443	4912665	4914320	1655	Y	perfectly mapped
444	4914342	4924202	9860	Y	perfectly mapped
445	4924224	4927406	3182	Y	perfectly mapped
446	4927669	4928757	1088	Y	perfectly mapped
447	4928919	4930088	1169	unmappable	no match
448	4930190	4931562	1372	unmappable	no match
449	4931584	4932624	1040	unmappable	no match
450	4932646	4934903	2257	unmappable	no match
451	4942278	4943397	1119	unmappable	no match
452	4943419	4947055	3636	unmappable	no match
453	4947088	4948487	1399	unmappable	no match
454	4948589	4950615	2026	unmappable	no match
455	4950637	4951882	1245	unmappable	no match
456	4951904	4954531	2627	XY	perfectly mapped
457	4961303	4962523	1220	unmappable	no match
458	4962800	4963927	1127	unmappable	no match
459	4963949	4965056	1107	unmappable	no match
460	4965078	4966500	1422	unmappable	no match
461	4966602	4967775	1173	unmappable	no match
462	4975508	4977337	1829	unmappable	no match
463	4977359	4979167	1808	unmappable	no match
464	4979220	4981287	2067	unmappable	no match
465	4981389	4984122	2733	unmappable	no match
466	4984144	4985849	1705	XY	perfectly mapped
467	4992105	4993755	1650	unmappable	no match
468	4993882	4995586	1704	Y	perfectly mapped
469	4995688	4999892	4204	Y	perfectly mapped
470	5007801	5011194	3393	Y	perfectly mapped
471	5011216	5012674	1458	unmappable	no match
472	5013342	5017496	4154	unmappable	no match
473	5019447	5020920	1473	unmappable	no match
474	5021304	5022957	1653	unmappable	no match
475	5023353	5027936	4583	unmappable	no match
476	5027974	5028986	1012	unmappable	no match
477	5029653	5032919	3266	unmappable	no match
478	5033021	5035042	2021	unmappable	no match
479	5035097	5037711	2614	unmappable	no match
480	5046637	5048102	1465	unmappable	no match
481	5048204	5049663	1459	unmappable	no match
482	5049799	5054274	4475	unmappable	no match
483	5060038	5063488	3450	unmappable	no match
484	5070174	5072290	2116	unmappable	no match
485	5075192	5078751	3559	unmappable	no match
486	5080653	5082724	2071	unmappable	no match
487	5083172	5084463	1291	unmappable	no match
488	5084565	5087667	3102	unmappable	no match
489	5094583	5097845	3262	unmappable	no match
490	5097996	5101491	3495	unmappable	no match
491	5103678	5107731	4053	unmappable	no match
492	5108100	5109263	1163	unmappable	no match
493	5109285	5111483	2198	unmappable	no match
494	5118384	5121536	3152	unmappable	no match
495	5121638	5123236	1598	unmappable	no match
496	5123478	5124802	1324	unmappable	no match
497	5131986	5133360	1374	unmappable	no match
498	5133698	5135144	1446	unmappable	no match
499	5135246	5136497	1251	3CEN	perfectly mapped
500	5136923	5138448	1525	3CEN	perfectly mapped
501	5145320	5146608	1288	3CEN	perfectly mapped
502	5146877	5149006	2129	3CEN	perfectly mapped
503	5149108	5150271	1163	unmappable	no match
504	5157019	5159162	2143	unmappable	no match
505	5159831	5161133	1302	unmappable	no match
506	5161235	5163957	2722	unmappable	no match
507	5169262	5175144	5882	unmappable	no match
508	5182104	5185324	3220	unmappable	no match
509	5185426	5189910	4484	2R6	perfectly mapped
510	5190012	5191171	1159	unmappable	no match
511	5197710	5202812	5102	3CEN	perfectly mapped
512	5202914	5203939	1025	unmappable	no match
513	5211274	5215960	4686	2R5	perfectly mapped
514	5222867	5223986	1119	2R5	perfectly mapped
515	5224088	5227042	2954	3CEN	perfectly mapped
516	5234105	5237587	3482	3CEN	perfectly mapped
517	5237689	5240670	2981	Y	perfectly mapped
518	5248222	5250766	2544	Y	perfectly mapped
519	5250868	5254810	3942	unmappable	no match
520	5262363	5265849	3486	unmappable	no match
521	5265951	5267464	1513	unmappable	no match
522	5267566	5270281	2715	3R	perfectly mapped
523	5278590	5280245	1655	3R	perfectly mapped
524	5280347	5282269	1922	unmappable	no match
525	5282371	5283506	1135	unmappable	no match
526	5283608	5284627	1019	unmappable	no match
527	5284729	5288042	3313	Y	perfectly mapped
528	5288144	5305749	17605	3CEN	perfectly mapped
529	5305851	5308864	3013	unmappable	no match
530	5315329	5321371	6042	unmappable	no match
531	5321473	5322575	1102	unmappable	no match
532	5323074	5324073	999	unmappable	no match
533	5330854	5336539	5685	unmappable	no match
534	5336641	5337934	1293	unmappable	no match
535	5345827	5350645	4818	unmappable	no match
536	5350747	5354816	4069	unmappable	no match
537	5362080	5364298	2218	unmappable	no match
538	5364400	5366256	1856	unmappable	no match
539	5374251	5377254	3003	unmappable	no match
540	5377356	5378416	1060	unmappable	no match
541	5387185	5388435	1250	unmappable	no match
542	5388516	5389813	1297	unmappable	no match
543	5389915	5391114	1199	unmappable	no match
544	5400254	5401915	1661	unmappable	no match
545	5402017	5405477	3460	unmappable	no match
546	5412785	5413822	1037	unmappable	no match
547	5413924	5414976	1052	Y	perfectly mapped
548	5415284	5416165	881	Y	perfectly mapped
549	5424526	5425685	1159	Y	perfectly mapped
550	5425787	5426830	1043	unmappable	no match
551	5436111	5437354	1243	unmappable	no match
552	5437456	5447319	9863	unmappable	no match
553	5447421	5456787	9366	X3/X4	perfectly mapped
554	5456889	5458101	1212	3CEN	perfectly mapped
555	5458228	5466228	8000	3CEN	perfectly mapped
556	5466330	5474996	8666	X2	perfectly mapped
557	5475098	5483442	8344	unmappable	no match
558	5483544	5491549	8005	3CEN	perfectly mapped
559	5491651	5499371	7720	2R5	perfectly mapped
560	5499473	5506785	7312	3CEN	perfectly mapped
561	5506887	5514062	7175	unmappable	no match
562	5514164	5521285	7121	X3/X4	perfectly mapped
563	5521387	5525050	3663	unmappable	no match
564	5525072	5526108	1036	unmappable	no match
565	5526144	5528388	2244	unmappable	no match
566	5528490	5535424	6934	unmappable	no match
567	5535526	5542428	6902	Y	perfectly mapped
568	5542530	5549428	6898	unmappable	no match
569	5549530	5552994	3464	unmappable	no match
570	5553016	5554278	1262	unmappable	no match
571	5554641	5556388	1747	unmappable	no match
572	5556490	5557690	1200	unmappable	no match
573	5557975	5563348	5373	2R6	perfectly mapped
574	5563450	5568132	4682	unmappable	no match
575	5568715	5570273	1558	unmappable	no match
576	5570375	5577093	6718	unmappable	no match
577	5577195	5583891	6696	unmappable	no match
578	5583993	5590537	6544	unmappable	no match
579	5590639	5597151	6512	unmappable	disagree
580	5597253	5603691	6438	unmappable	no match
581	5603793	5610206	6413	unmappable	disagree
582	5610308	5615360	5052	XY	perfectly mapped
583	5615682	5616702	1020	unmappable	no match
584	5616804	5623096	6292	unmappable	no match
585	5623198	5629433	6235	3CEN	perfectly mapped
586	5629535	5635726	6191	unmappable	no match
587	5635828	5641982	6154	unmappable	disagree
588	5642084	5648158	6074	unmappable	no match
589	5648260	5652656	4396	3CEN	perfectly mapped
590	5652916	5654320	1404	3CEN	perfectly mapped
591	5654422	5660461	6039	unmappable	no match
592	5660563	5666581	6018	unmappable	no match
593	5666683	5672681	5998	unmappable	disagree
594	5672783	5678769	5986	3CEN	perfectly mapped
595	5678871	5680454	1583	Y	perfectly mapped
596	5680476	5681992	1516	Y	perfectly mapped
597	5682014	5683267	1253	Y	perfectly mapped
598	5683777	5684853	1076	Y	perfectly mapped
599	5684955	5690933	5978	unmappable	no match
600	5691035	5697001	5966	unmappable	no match
601	5697103	5703053	5950	3R	perfectly mapped
602	5703155	5705219	2064	unmappable	no match
603	5705241	5707019	1778	unmappable	no match
604	5707602	5709068	1466	unmappable	no match
605	5709170	5715059	5889	3CEN	perfectly mapped
606	5715161	5720991	5830	X3/X4	perfectly mapped
607	5721093	5726863	5770	3R	mapped
608	5726965	5729287	2322	XY	perfectly mapped
609	5729961	5730793	832	3CEN	perfectly mapped
610	5731210	5732723	1513	unmappable	no match
611	5732825	5738521	5696	unmappable	no match
612	5738623	5741547	2924	Y	perfectly mapped
613	5741569	5744185	2616	Y	perfectly mapped
614	5744287	5749840	5553	X3/X4	perfectly mapped
615	5749942	5751148	1206	unmappable	no match
616	5751195	5755460	4265	Y	perfectly mapped
617	5755562	5761043	5481	Y	perfectly mapped
618	5761145	5766608	5463	unmappable	no match
619	5766710	5772171	5461	XY	perfectly mapped
620	5772273	5777702	5429	2R6	perfectly mapped
621	5777804	5783189	5385	X	mapped
622	5783291	5788672	5381	Y	perfectly mapped
623	5788774	5791116	2342	unmappable	no match
624	5791138	5794132	2994	unmappable	no match
625	5794234	5799556	5322	unmappable	no match
626	5799658	5800881	1223	unmappable	no match
627	5800903	5802845	1942	unmappable	no match
628	5802874	5804979	2105	unmappable	no match
629	5805081	5810395	5314	unmappable	no match
630	5810497	5812415	1918	3CEN	perfectly mapped
631	5812757	5814203	1446	unmappable	no match
632	5814353	5815776	1423	unmappable	no match
633	5815878	5821142	5264	3CEN	mapped
634	5821244	5826474	5230	X2	perfectly mapped
635	5826576	5829242	2666	unmappable	no match
636	5829431	5831763	2332	unmappable	no match
637	5831865	5833149	1284	unmappable	no match
638	5833616	5837045	3429	Y	perfectly mapped
639	5837147	5842243	5096	unmappable	no match
640	5842345	5847404	5059	unmappable	no match
641	5847506	5849666	2160	3CEN	perfectly mapped
642	5850174	5852564	2390	3CEN	perfectly mapped
643	5852666	5857721	5055	X3/X4	perfectly mapped
644	5857823	5862847	5024	2R1	perfectly mapped
645	5862949	5867947	4998	unmappable	no match
646	5868049	5873043	4994	unmappable	no match
647	5873145	5878137	4992	unmappable	no match
648	5878239	5883223	4984	2R5	perfectly mapped
649	5883325	5886780	3455	unmappable	no match
650	5887055	5888290	1235	unmappable	no match
651	5888392	5890884	2492	unmappable	no match
652	5891016	5893329	2313	unmappable	no match
653	5893431	5898362	4931	3CEN	perfectly mapped
654	5898464	5903379	4915	X2	perfectly mapped
655	5903481	5908382	4901	XY	perfectly mapped
656	5908484	5910916	2432	unmappable	no match
657	5911096	5913370	2274	unmappable	no match
658	5913472	5918349	4877	X3/X4	perfectly mapped
659	5918451	5923314	4863	unmappable	no match
660	5923416	5928243	4827	3CEN	perfectly mapped
661	5928345	5931149	2804	unmappable	disagree
662	5931171	5933163	1992	unmappable	disagree
663	5933265	5936563	3298	unmappable	no match
664	5936585	5938078	1493	unmappable	no match
665	5938180	5942968	4788	unmappable	no match
666	5943070	5947857	4787	Y	perfectly mapped
667	5947959	5952742	4783	unmappable	no match
668	5952844	5957623	4779	unmappable	disagree
669	5957725	5962493	4768	unmappable	no match
670	5962595	5967358	4763	3R	perfectly mapped
671	5967460	5972163	4703	unmappable	disagree
672	5972265	5976964	4699	3CEN	perfectly mapped
673	5977066	5981728	4662	unmappable	disagree
674	5981830	5986482	4652	2R6	perfectly mapped
675	5986584	5991234	4650	unmappable	disagree
676	5991336	5994519	3183	unmappable	no match
677	5994549	5995942	1393	unmappable	no match
678	5996044	6000625	4581	unmappable	no match
679	6000727	6005306	4579	2R2	perfectly mapped
680	6005408	6009979	4571	2R5	perfectly mapped
681	6010081	6011471	1390	XY	perfectly mapped
682	6011493	6014632	3139	XY	mapped
683	6014734	6019251	4517	unmappable	no match
684	6019353	6023866	4513	X3/X4	perfectly mapped
685	6023968	6028437	4469	Y	perfectly mapped
686	6028539	6033002	4463	3CEN	perfectly mapped
687	6033104	6034160	1056	unmappable	no match
688	6034182	6037554	3372	unmappable	no match
689	6037656	6042099	4443	unmappable	no match
690	6042201	6046635	4434	3CEN	perfectly mapped
691	6046737	6051135	4398	3CEN	perfectly mapped
692	6051237	6055632	4395	3L	perfectly mapped
693	6055734	6060127	4393	X3/X4	perfectly mapped
694	6060229	6064621	4392	unmappable	disagree
695	6064723	6069102	4379	3CEN	perfectly mapped
696	6069204	6073580	4376	3CEN	perfectly mapped
697	6073682	6078057	4375	Y	perfectly mapped
698	6078159	6082527	4368	unmappable	no match
699	6082629	6086991	4362	unmappable	disagree
700	6087093	6088093	1000	unmappable	no match
701	6088322	6091452	3130	unmappable	no match
702	6091554	6095888	4334	unmappable	no match
703	6095990	6097231	1241	3CEN	perfectly mapped
704	6097607	6100312	2705	3CEN	perfectly mapped
705	6100414	6104722	4308	unmappable	no match
706	6104824	6109132	4308	unmappable	no match
707	6109234	6112225	2991	unmappable	disagree
708	6112247	6113537	1290	unmappable	disagree
709	6113639	6117932	4293	Y	perfectly mapped
710	6118034	6122321	4287	3R	perfectly mapped
711	6122423	6123450	1027	3CEN	perfectly mapped
712	6123692	6126694	3002	3CEN	perfectly mapped
713	6126796	6131066	4270	unmappable	no match
714	6131168	6134035	2867	unmappable	no match
715	6134254	6135422	1168	unmappable	no match
716	6135524	6139765	4241	3CEN	perfectly mapped
717	6139867	6144096	4229	unmappable	no match
718	6144198	6148421	4223	unmappable	no match
719	6148523	6152743	4220	XY	perfectly mapped
720	6152845	6153908	1063	unmappable	no match
721	6154335	6157065	2730	2R2	perfectly mapped
722	6157167	6158827	1660	unmappable	no match
723	6158849	6159982	1133	unmappable	no match
724	6160225	6161367	1142	unmappable	no match
725	6161469	6165664	4195	Y	perfectly mapped
726	6165766	6166845	1079	unmappable	no match
727	6167083	6169952	2869	unmappable	no match
728	6170054	6174235	4181	unmappable	no match
729	6174337	6178517	4180	3CEN	perfectly mapped
730	6178619	6182780	4161	unmappable	no match
731	6182882	6187030	4148	3CEN	perfectly mapped
732	6187132	6191265	4133	3CEN	perfectly mapped
733	6191367	6195476	4109	3CEN	perfectly mapped
734	6195578	6199680	4102	3CEN	perfectly mapped
735	6199782	6203871	4089	unmappable	no match
736	6203973	6208056	4083	X3/X4	perfectly mapped
737	6208158	6210458	2300	3CEN	perfectly mapped
738	6211144	6212237	1093	3CEN	perfectly mapped
739	6212339	6216415	4076	2R5	perfectly mapped
740	6216517	6220587	4070	X3/X4	perfectly mapped
741	6220689	6224746	4057	Y	perfectly mapped
742	6224848	6228880	4032	unmappable	no match
743	6228982	6233010	4028	unmappable	no match
744	6233112	6237123	4011	X4	perfectly mapped
745	6237225	6241235	4010	X3/X4	perfectly mapped
746	6241337	6245346	4009	3R	perfectly mapped
747	6245448	6249452	4004	unmappable	no match
748	6249554	6253543	3989	unmappable	no match
749	6253645	6257627	3982	X3/X4	perfectly mapped
750	6257729	6261697	3968	3CEN	perfectly mapped
751	6261799	6265761	3962	unmappable	no match
752	6265863	6269821	3958	unmappable	no match
753	6269923	6271136	1213	unmappable	no match
754	6271158	6273871	2713	unmappable	no match
755	6273973	6277919	3946	Y	perfectly mapped
756	6278021	6281960	3939	X1	perfectly mapped
757	6282062	6283138	1076	unmappable	disagree
758	6283331	6285992	2661	unmappable	disagree
759	6286094	6288678	2584	X3/X4	perfectly mapped
760	6288700	6290018	1318	X3/X4	perfectly mapped
761	6290120	6294042	3922	unmappable	no match
762	6294144	6298063	3919	X1	perfectly mapped
763	6298165	6300533	2368	3CEN	perfectly mapped
764	6300756	6302076	1320	3CEN	perfectly mapped
765	6302178	6306089	3911	X1	perfectly mapped
766	6306191	6310095	3904	unmappable	no match
767	6310197	6314099	3902	3R	perfectly mapped
768	6314201	6318071	3870	3CEN	perfectly mapped
769	6318173	6319752	1579	unmappable	no match
770	6319879	6322042	2163	unmappable	no match
771	6322144	6326006	3862	unmappable	no match
772	6326108	6329964	3856	Y	perfectly mapped
773	6330066	6333895	3829	unmappable	no match
774	6333997	6337816	3819	2R5	perfectly mapped
775	6337918	6341734	3816	unmappable	disagree
776	6341836	6344316	2480	unmappable	no match
777	6344570	6345641	1071	unmappable	no match
778	6345743	6349547	3804	3CEN	perfectly mapped
779	6349649	6353453	3804	unmappable	no match
780	6353555	6357358	3803	unmappable	no match
781	6357460	6361233	3773	X3/X4	perfectly mapped
782	6361335	6365107	3772	unmappable	no match
783	6365209	6368962	3753	unmappable	no match
784	6369064	6372807	3743	X3/X4	perfectly mapped
785	6372909	6376644	3735	3CEN	perfectly mapped
786	6376746	6380474	3728	X3/X4	perfectly mapped
787	6380576	6384291	3715	unmappable	no match
788	6384393	6388107	3714	unmappable	no match
789	6388209	6391920	3711	Y	perfectly mapped
790	6392022	6395731	3709	3CEN	perfectly mapped
791	6395833	6399539	3706	unmappable	no match
792	6399641	6403331	3690	unmappable	no match
793	6403433	6407122	3689	Y	perfectly mapped
794	6407224	6408980	1756	unmappable	no match
795	6409521	6410903	1382	unmappable	no match
796	6411005	6414663	3658	unmappable	no match
797	6414765	6415938	1173	unmappable	no match
798	6416031	6418413	2382	unmappable	no match
799	6418515	6419934	1419	unmappable	disagree
800	6419967	6422162	2195	unmappable	disagree
801	6422264	6425910	3646	3CEN	perfectly mapped
802	6426012	6429656	3644	unmappable	no match
803	6429758	6433396	3638	unmappable	no match
804	6433498	6437134	3636	unmappable	no match
805	6437236	6440856	3620	3CEN	perfectly mapped
806	6440958	6444578	3620	unmappable	no match
807	6444680	6448281	3601	X3/X4	perfectly mapped
808	6448383	6451984	3601	unmappable	no match
809	6452086	6455686	3600	X	mapped
810	6455788	6459379	3591	unmappable	disagree
811	6459481	6463061	3580	X1	perfectly mapped
812	6463163	6466735	3572	3CEN	perfectly mapped
813	6466837	6470394	3557	unmappable	no match
814	6470496	6474051	3555	unmappable	no match
815	6474153	6477705	3552	unmappable	no match
816	6477807	6481358	3551	X2	perfectly mapped
817	6481460	6485011	3551	3CEN	perfectly mapped
818	6485113	6486536	1423	unmappable	no match
819	6486892	6488664	1772	unmappable	no match
820	6488766	6492313	3547	unmappable	no match
821	6492415	6494494	2079	Y	perfectly mapped
822	6494814	6495950	1136	Y	perfectly mapped
823	6496052	6499577	3525	unmappable	no match
824	6499679	6503204	3525	X4	perfectly mapped
825	6503306	6506828	3522	unmappable	no match
826	6506930	6510451	3521	X3/X4	perfectly mapped
827	6510553	6511712	1159	unmappable	no match
828	6511861	6512995	1134	unmappable	no match
829	6513017	6514070	1053	unmappable	no match
830	6514172	6516363	2191	3R	mapped
831	6516476	6517673	1197	3R	perfectly mapped
832	6517775	6521275	3500	Y	perfectly mapped
833	6521377	6522742	1365	unmappable	no match
834	6522764	6524874	2110	Y	perfectly mapped
835	6524976	6528472	3496	3R	perfectly mapped
836	6528574	6532070	3496	X1	perfectly mapped
837	6532172	6535660	3488	unmappable	no match
838	6535762	6539238	3476	X3/X4	perfectly mapped
839	6539340	6542815	3475	unmappable	disagree
840	6542917	6546392	3475	X3/X4	perfectly mapped
841	6546494	6549965	3471	X3/X4	perfectly mapped
842	6550067	6553531	3464	unmappable	no match
843	6553633	6557094	3461	unmappable	no match
844	6557196	6558452	1256	unmappable	no match
845	6558706	6560652	1946	unmappable	no match
846	6560754	6564206	3452	3CEN	perfectly mapped
847	6564308	6567740	3432	unmappable	no match
848	6567842	6571270	3428	unmappable	no match
849	6571372	6574776	3404	3L	mapped
850	6574878	6578278	3400	3CEN	perfectly mapped
851	6578380	6581774	3394	unmappable	no match
852	6581876	6585264	3388	unmappable	no match
853	6585366	6588753	3387	unmappable	no match
854	6588855	6592239	3384	unmappable	disagree
855	6592341	6593383	1042	Y	perfectly mapped
856	6593405	6595714	2309	Y	perfectly mapped
857	6595816	6599188	3372	Y	perfectly mapped
858	6599290	6602661	3371	unmappable	no match
859	6602763	6606134	3371	Y	perfectly mapped
860	6606236	6609605	3369	X3/X4	perfectly mapped
861	6609707	6613070	3363	unmappable	disagree
862	6613172	6616524	3352	X3/X4	perfectly mapped
863	6616626	6619972	3346	unmappable	no match
864	6620074	6623419	3345	X3/X4	perfectly mapped
865	6623521	6626860	3339	Y	perfectly mapped
866	6626962	6630285	3323	unmappable	no match
867	6630387	6633698	3311	unmappable	no match
868	6633800	6637106	3306	X	perfectly mapped
869	6637208	6640508	3300	3CEN	perfectly mapped
870	6640610	6643907	3297	unmappable	disagree
871	6644009	6645376	1367	X3/X4	perfectly mapped
872	6645398	6647297	1899	X3/X4	perfectly mapped
873	6647399	6650681	3282	unmappable	no match
874	6650783	6654058	3275	3CEN	perfectly mapped
875	6654160	6657433	3273	X3/X4	perfectly mapped
876	6657535	6660801	3266	3R	perfectly mapped
877	6660903	6664163	3260	unmappable	no match
878	6664265	6667524	3259	3R	perfectly mapped
879	6667626	6670883	3257	unmappable	no match
880	6670985	6674242	3257	unmappable	no match
881	6674344	6677601	3257	unmappable	no match
882	6677703	6680955	3252	X1	perfectly mapped
883	6681057	6682548	1491	unmappable	no match
884	6682872	6684307	1435	unmappable	no match
885	6684409	6687642	3233	unmappable	no match
886	6687744	6690976	3232	unmappable	no match
887	6691078	6694305	3227	Y	perfectly mapped
888	6694407	6695715	1308	3CEN	perfectly mapped
889	6695885	6697632	1747	unmappable	no match
890	6697734	6700955	3221	unmappable	no match
891	6701057	6704278	3221	X2	perfectly mapped
892	6704380	6707596	3216	unmappable	no match
893	6707698	6710909	3211	Y	perfectly mapped
894	6711011	6714218	3207	3CEN	perfectly mapped
895	6714320	6717524	3204	X1	perfectly mapped
896	6717626	6720827	3201	unmappable	no match
897	6720929	6724128	3199	unmappable	no match
898	6724230	6727429	3199	X1	perfectly mapped
899	6727531	6730726	3195	3CEN	perfectly mapped
900	6730828	6734022	3194	unmappable	no match
901	6734124	6737317	3193	Y	perfectly mapped
902	6737419	6740611	3192	unmappable	disagree
903	6740713	6743901	3188	unmappable	no match
904	6744003	6747184	3181	unmappable	no match
905	6747286	6750461	3175	X3/X4	perfectly mapped
906	6750563	6753738	3175	Y	perfectly mapped
907	6753840	6757014	3174	Y	perfectly mapped
908	6757116	6760288	3172	unmappable	disagree
909	6760390	6763561	3171	Y	perfectly mapped
910	6763663	6766832	3169	unmappable	no match
911	6766934	6770094	3160	unmappable	no match
912	6770196	6771657	1461	unmappable	no match
913	6772284	6773353	1069	unmappable	no match
914	6773455	6776610	3155	3CEN	perfectly mapped
915	6776712	6779866	3154	3CEN	perfectly mapped
916	6779968	6781815	1847	unmappable	no match
917	6781900	6783120	1220	Y	perfectly mapped
918	6783222	6786364	3142	unmappable	disagree
919	6786466	6789593	3127	XY	perfectly mapped
920	6789695	6792816	3121	X1	perfectly mapped
921	6792918	6796039	3121	unmappable	no match
922	6796141	6799259	3118	2R5	perfectly mapped
923	6799361	6802461	3100	Y	perfectly mapped
924	6802563	6805661	3098	unmappable	no match
925	6805763	6808861	3098	X3/X4	perfectly mapped
926	6808963	6812050	3087	unmappable	no match
927	6812152	6815235	3083	unmappable	no match
928	6815337	6818415	3078	unmappable	no match
929	6818517	6820058	1541	unmappable	no match
930	6820330	6821595	1265	unmappable	no match
931	6821697	6824772	3075	Y	perfectly mapped
932	6824874	6827948	3074	X4	perfectly mapped
933	6828050	6831121	3071	3CEN	perfectly mapped
934	6831223	6834294	3071	unmappable	no match
935	6834396	6837459	3063	X3/X4	perfectly mapped
936	6837561	6840618	3057	X3/X4	perfectly mapped
937	6840720	6843776	3056	Y	perfectly mapped
938	6843878	6846922	3044	Y	perfectly mapped
939	6847024	6850066	3042	3CEN	perfectly mapped
940	6850168	6853209	3041	unmappable	no match
941	6853311	6854670	1359	unmappable	disagree
942	6854692	6856334	1642	unmappable	disagree
943	6856436	6859458	3022	X4	perfectly mapped
944	6859560	6862571	3011	2R1	perfectly mapped
945	6862673	6865681	3008	3CEN	perfectly mapped
946	6865783	6868790	3007	3CEN	perfectly mapped
947	6868892	6871894	3002	Y	perfectly mapped
948	6871996	6874210	2214	X1	perfectly mapped
949	6874232	6874996	764	X1	perfectly mapped
950	6875098	6878095	2997	unmappable	no match
951	6878197	6881194	2997	X1	perfectly mapped
952	6881296	6884290	2994	X2	perfectly mapped
953	6884392	6885404	1012	unmappable	no match
954	6886076	6887381	1305	unmappable	no match
955	6887483	6890465	2982	unmappable	no match
956	6890567	6893547	2980	unmappable	no match
957	6893649	6896629	2980	unmappable	no match
958	6896731	6899700	2969	unmappable	no match
959	6899802	6902764	2962	X1	perfectly mapped
960	6902866	6905821	2955	XY	perfectly mapped
961	6905923	6908878	2955	unmappable	no match
962	6908980	6911934	2954	X3/X4	perfectly mapped
963	6912036	6913057	1021	X3	perfectly mapped
964	6913242	6914979	1737	X3/X4	perfectly mapped
965	6915081	6918022	2941	unmappable	disagree
966	6918124	6921059	2935	unmappable	no match
967	6921161	6922797	1636	X3	perfectly mapped
968	6922887	6924096	1209	X3	perfectly mapped
969	6924198	6927124	2926	3CEN	perfectly mapped
970	6927226	6930151	2925	unmappable	no match
971	6930253	6933177	2924	unmappable	no match
972	6933279	6936201	2922	unmappable	no match
973	6936303	6939223	2920	unmappable	no match
974	6939325	6942245	2920	Y	perfectly mapped
975	6942347	6945264	2917	unmappable	no match
976	6945366	6947093	1727	unmappable	no match
977	6947145	6948280	1135	XY	perfectly mapped
978	6948382	6951294	2912	3R	perfectly mapped
979	6951396	6954305	2909	unmappable	no match
980	6954407	6957315	2908	X3/X4	perfectly mapped
981	6957417	6960320	2903	Y	perfectly mapped
982	6960422	6963324	2902	X1	perfectly mapped
983	6963426	6966327	2901	unmappable	disagree
984	6966429	6969326	2897	Y	perfectly mapped
985	6969428	6971002	1574	unmappable	no match
986	6971136	6972319	1183	unmappable	no match
987	6972421	6975308	2887	unmappable	no match
988	6975410	6978292	2882	unmappable	no match
989	6978394	6981274	2880	unmappable	no match
990	6981376	6984256	2880	unmappable	no match
991	6984358	6987238	2880	Y	perfectly mapped
992	6987340	6990219	2879	unmappable	no match
993	6990321	6993200	2879	unmappable	no match
994	6993302	6996177	2875	X1	perfectly mapped
995	6996279	6999153	2874	unmappable	no match
996	6999255	7002124	2869	X	perfectly mapped
997	7002226	7005093	2867	unmappable	no match
998	7005195	7008053	2858	3CEN	perfectly mapped
999	7008155	7011013	2858	unmappable	no match
1000	7011115	7013971	2856	unmappable	disagree
1001	7014073	7016929	2856	2R6	perfectly mapped
1002	7017031	7019884	2853	unmappable	no match
1003	7019986	7022836	2850	unmappable	no match
1004	7022938	7024117	1179	unmappable	no match
1005	7024427	7025785	1358	unmappable	no match
1006	7025887	7028733	2846	XY	mapped
1007	7028835	7031679	2844	X3/X4	perfectly mapped
1008	7031781	7034623	2842	X3/X4	perfectly mapped
1009	7034725	7037564	2839	X1	perfectly mapped
1010	7037666	7040504	2838	unmappable	no match
1011	7040606	7042087	1481	Y	perfectly mapped
1012	7042303	7043440	1137	unmappable	no match
1013	7043542	7046376	2834	Y	perfectly mapped
1014	7046478	7049310	2832	X3	perfectly mapped
1015	7049412	7052243	2831	X4	perfectly mapped
1016	7052345	7055173	2828	X2	perfectly mapped
1017	7055275	7058102	2827	X1	perfectly mapped
1018	7058204	7061030	2826	Y	perfectly mapped
1019	7061132	7063955	2823	X3	perfectly mapped
1020	7064057	7066878	2821	X1	perfectly mapped
1021	7066980	7069800	2820	X1	perfectly mapped
1022	7069902	7072722	2820	3CEN	perfectly mapped
1023	7072824	7075642	2818	unmappable	no match
1024	7075744	7078561	2817	X3/X4	perfectly mapped
1025	7078663	7081476	2813	unmappable	no match
1026	7081578	7084391	2813	Y	perfectly mapped
1027	7084493	7087305	2812	X3/X4	perfectly mapped
1028	7087407	7090216	2809	unmappable	disagree
1029	7090318	7093120	2802	unmappable	no match
1030	7093222	7096019	2797	Y	perfectly mapped
1031	7096121	7098915	2794	3CEN	perfectly mapped
1032	7099017	7101810	2793	3CEN	perfectly mapped
1033	7101912	7104705	2793	unmappable	no match
1034	7104807	7107599	2792	3R	perfectly mapped
1035	7107701	7110493	2792	unmappable	disagree
1036	7110595	7111713	1118	XY	perfectly mapped
1037	7112348	7113386	1038	unmappable	no match
1038	7113488	7116279	2791	3CEN	perfectly mapped
1039	7116381	7119170	2789	unmappable	no match
1040	7119272	7122060	2788	XY	perfectly mapped
1041	7122162	7123871	1709	unmappable	no match
1042	7123893	7124948	1055	unmappable	no match
1043	7125050	7127835	2785	unmappable	no match
1044	7127937	7130720	2783	unmappable	no match
1045	7130822	7133604	2782	2R5	perfectly mapped
1046	7133706	7136487	2781	Y	perfectly mapped
1047	7136589	7139368	2779	X1	perfectly mapped
1048	7139470	7142233	2763	X1	perfectly mapped
1049	7142335	7145096	2761	unmappable	no match
1050	7145198	7147958	2760	Y	perfectly mapped
1051	7148060	7150809	2749	X1	perfectly mapped
1052	7150911	7153659	2748	X1	perfectly mapped
1053	7153761	7156504	2743	unmappable	no match
1054	7156606	7159348	2742	unmappable	no match
1055	7159450	7162184	2734	unmappable	no match
1056	7162286	7165017	2731	unmappable	no match
1057	7165119	7166552	1433	Y	perfectly mapped
1058	7166574	7167845	1271	Y	perfectly mapped
1059	7167947	7170671	2724	2R2	perfectly mapped
1060	7170773	7173489	2716	unmappable	no match
1061	7173591	7176305	2714	Y	perfectly mapped
1062	7176407	7179114	2707	Y	perfectly mapped
1063	7179216	7181922	2706	unmappable	no match
1064	7182024	7184725	2701	unmappable	no match
1065	7184827	7187523	2696	X4	perfectly mapped
1066	7187625	7190320	2695	unmappable	no match
1067	7190422	7193117	2695	unmappable	disagree
1068	7193219	7195911	2692	Y	perfectly mapped
1069	7196013	7198700	2687	X1	perfectly mapped
1070	7198802	7201488	2686	unmappable	disagree
1071	7201590	7204276	2686	Y	perfectly mapped
1072	7204378	7207062	2684	X2	perfectly mapped
1073	7207164	7209833	2669	2R6	perfectly mapped
1074	7209935	7212604	2669	X4	perfectly mapped
1075	7212706	7215374	2668	3CEN	perfectly mapped
1076	7215476	7216668	1192	unmappable	no match
1077	7216811	7218143	1332	unmappable	no match
1078	7218245	7220911	2666	unmappable	no match
1079	7221013	7223676	2663	unmappable	no match
1080	7223778	7225136	1358	unmappable	no match
1081	7225429	7226440	1011	unmappable	no match
1082	7226542	7229187	2645	unmappable	no match
1083	7229289	7231933	2644	3L	mapped
1084	7232035	7234678	2643	unmappable	no match
1085	7234780	7235900	1120	unmappable	disagree
1086	7236181	7237422	1241	3L	perfectly mapped
1087	7237524	7238652	1128	Y	perfectly mapped
1088	7238674	7240164	1490	Y	perfectly mapped
1089	7240266	7242905	2639	X1	perfectly mapped
1090	7243007	7245644	2637	Y	perfectly mapped
1091	7245746	7248383	2637	X1	perfectly mapped
1092	7248485	7251120	2635	X1	perfectly mapped
1093	7251222	7253856	2634	unmappable	no match
1094	7253958	7256591	2633	X3/X4	perfectly mapped
1095	7256693	7259322	2629	2CEN	perfectly mapped
1096	7259424	7260626	1202	XY	perfectly mapped
1097	7260731	7262051	1320	unmappable	no match
1098	7262153	7263442	1289	unmappable	no match
1099	7263585	7264779	1194	unmappable	no match
1100	7264881	7265917	1036	unmappable	no match
1101	7266151	7267505	1354	unmappable	no match
1102	7267607	7270225	2618	3CEN	perfectly mapped
1103	7270327	7272943	2616	unmappable	disagree
1104	7273045	7274255	1210	unmappable	no match
1105	7274542	7275660	1118	unmappable	no match
1106	7275762	7278377	2615	unmappable	no match
1107	7278479	7281089	2610	unmappable	disagree
1108	7281191	7283800	2609	3L	perfectly mapped
1109	7283902	7286507	2605	unmappable	no match
1110	7286609	7289212	2603	X1	perfectly mapped
1111	7289314	7291915	2601	X2	perfectly mapped
1112	7292017	7294618	2601	unmappable	no match
1113	7294720	7297316	2596	unmappable	no match
1114	7297418	7300007	2589	X1	perfectly mapped
1115	7300109	7302695	2586	unmappable	no match
1116	7302797	7305379	2582	unmappable	disagree
1117	7305481	7308062	2581	unmappable	no match
1118	7308164	7310743	2579	X4	perfectly mapped
1119	7310845	7313420	2575	unmappable	no match
1120	7313522	7316097	2575	3CEN	perfectly mapped
1121	7316199	7318773	2574	unmappable	disagree
1122	7318875	7321448	2573	2CEN	perfectly mapped
1123	7321550	7324123	2573	XY	mapped
1124	7324225	7325225	1000	unmappable	no match
1125	7325732	7326798	1066	unmappable	no match
1126	7326900	7329473	2573	unmappable	no match
1127	7329575	7332147	2572	unmappable	no match
1128	7332249	7333572	1323	unmappable	no match
1129	7333633	7334817	1184	unmappable	no match
1130	7334919	7336224	1305	unmappable	no match
1131	7336246	7337482	1236	Y	perfectly mapped
1132	7337584	7340143	2559	unmappable	no match
1133	7340245	7342800	2555	X1	perfectly mapped
1134	7342902	7345456	2554	unmappable	disagree
1135	7345558	7348111	2553	unmappable	no match
1136	7348213	7349333	1120	unmappable	no match
1137	7349632	7350766	1134	unmappable	no match
1138	7350868	7353415	2547	3CEN	perfectly mapped
1139	7353517	7356064	2547	unmappable	no match
1140	7356166	7358711	2545	unmappable	no match
1141	7358813	7359878	1065	unmappable	no match
1142	7360191	7361352	1161	unmappable	no match
1143	7361454	7363993	2539	unmappable	no match
1144	7364095	7366629	2534	3CEN	perfectly mapped
1145	7366731	7369259	2528	X3/X4	perfectly mapped
1146	7369361	7371888	2527	3CEN	perfectly mapped
1147	7371990	7374517	2527	unmappable	no match
1148	7374619	7377146	2527	unmappable	no match
1149	7377248	7378543	1295	Y	perfectly mapped
1150	7378565	7379768	1203	Y	perfectly mapped
1151	7379870	7382389	2519	Y	perfectly mapped
1152	7382491	7383498	1007	unmappable	no match
1153	7383920	7385010	1090	unmappable	no match
1154	7385112	7387630	2518	X1	perfectly mapped
1155	7387732	7390250	2518	unmappable	no match
1156	7390352	7392867	2515	unmappable	no match
1157	7392969	7395483	2514	3CEN	perfectly mapped
1158	7395585	7398094	2509	unmappable	no match
1159	7398196	7400705	2509	unmappable	no match
1160	7400807	7403315	2508	3CEN	perfectly mapped
1161	7403417	7405923	2506	Y	perfectly mapped
1162	7406025	7408528	2503	X1	perfectly mapped
1163	7408630	7411128	2498	X1	perfectly mapped
1164	7411230	7413719	2489	unmappable	no match
1165	7413821	7416306	2485	unmappable	disagree
1166	7416408	7418885	2477	unmappable	disagree
1167	7418987	7421464	2477	unmappable	no match
1168	7421566	7422638	1072	Y	perfectly mapped
1169	7422895	7424041	1146	Y	perfectly mapped
1170	7424143	7425324	1181	unmappable	no match
1171	7425448	7426617	1169	unmappable	no match
1172	7426719	7427727	1008	X3/X4	perfectly mapped
1173	7428037	7429192	1155	X3/X4	perfectly mapped
1174	7429294	7431767	2473	unmappable	disagree
1175	7431869	7434340	2471	Y	perfectly mapped
1176	7434442	7436910	2468	3CEN	perfectly mapped
1177	7437012	7438228	1216	X1	perfectly mapped
1178	7438448	7439474	1026	X1	perfectly mapped
1179	7439576	7442037	2461	X4	perfectly mapped
1180	7442139	7443384	1245	unmappable	no match
1181	7443541	7444599	1058	unmappable	no match
1182	7444701	7447150	2449	XY	perfectly mapped
1183	7447252	7449697	2445	unmappable	no match
1184	7449799	7452239	2440	3CEN	perfectly mapped
1185	7452341	7454778	2437	X1	perfectly mapped
1186	7454880	7457316	2436	3CEN	perfectly mapped
1187	7457418	7459854	2436	XY	perfectly mapped
1188	7459956	7462392	2436	Y	perfectly mapped
1189	7462494	7464927	2433	3CEN	perfectly mapped
1190	7465029	7467461	2432	unmappable	no match
1191	7467563	7469993	2430	X1	perfectly mapped
1192	7470095	7472524	2429	3CEN	perfectly mapped
1193	7472626	7475053	2427	unmappable	no match
1194	7475155	7477581	2426	unmappable	no match
1195	7477683	7480106	2423	X1	perfectly mapped
1196	7480208	7482631	2423	3CEN	perfectly mapped
1197	7482733	7485154	2421	unmappable	disagree
1198	7485256	7487675	2419	unmappable	no match
1199	7487777	7490196	2419	unmappable	no match
1200	7490298	7491435	1137	X1	perfectly mapped
1201	7491662	7492716	1054	X1	perfectly mapped
1202	7492818	7495235	2417	2R1	perfectly mapped
1203	7495337	7497754	2417	unmappable	disagree
1204	7497856	7500271	2415	unmappable	no match
1205	7500373	7502784	2411	X3/X4	perfectly mapped
1206	7502886	7505296	2410	X1	perfectly mapped
1207	7505398	7507808	2410	unmappable	disagree
1208	7507910	7510308	2398	unmappable	disagree
1209	7510410	7512802	2392	unmappable	no match
1210	7512904	7515296	2392	Y	perfectly mapped
1211	7515398	7517786	2388	unmappable	no match
1212	7517888	7520276	2388	unmappable	no match
1213	7520378	7522765	2387	X1	perfectly mapped
1214	7522867	7525250	2383	unmappable	no match
1215	7525352	7527735	2383	unmappable	no match
1216	7527837	7530220	2383	unmappable	no match
1217	7530322	7532704	2382	XY	perfectly mapped
1218	7532806	7535187	2381	XY	mapped
1219	7535289	7536429	1140	Y	perfectly mapped
1220	7536451	7537670	1219	Y	perfectly mapped
1221	7537772	7540152	2380	unmappable	disagree
1222	7540254	7542633	2379	XY	perfectly mapped
1223	7542735	7545114	2379	XY	perfectly mapped
1224	7545216	7547593	2377	unmappable	no match
1225	7547695	7550072	2377	X1	perfectly mapped
1226	7550174	7551440	1266	unmappable	no match
1227	7551547	7552550	1003	unmappable	no match
1228	7552652	7555025	2373	unmappable	no match
1229	7555127	7557497	2370	X3	perfectly mapped
1230	7557599	7559966	2367	unmappable	disagree
1231	7560068	7561196	1128	unmappable	disagree
1232	7561218	7562434	1216	unmappable	disagree
1233	7562536	7564900	2364	X3	perfectly mapped
1234	7565002	7567363	2361	X1	perfectly mapped
1235	7567465	7569824	2359	Y	perfectly mapped
1236	7569926	7572285	2359	unmappable	no match
1237	7572387	7574742	2355	X3/X4	perfectly mapped
1238	7574844	7577198	2354	unmappable	no match
1239	7577300	7579653	2353	X3/X4	perfectly mapped
1240	7579755	7582107	2352	unmappable	no match
1241	7582209	7584560	2351	X3/X4	perfectly mapped
1242	7584662	7587012	2350	unmappable	no match
1243	7587114	7589458	2344	unmappable	no match
1244	7589560	7591902	2342	unmappable	no match
1245	7592004	7594346	2342	2R5	perfectly mapped
1246	7594448	7596788	2340	Y	perfectly mapped
1247	7596890	7599230	2340	Y	perfectly mapped
1248	7599332	7601665	2333	X1	perfectly mapped
1249	7601767	7604099	2332	unmappable	no match
1250	7604201	7606529	2328	unmappable	no match
1251	7606631	7608957	2326	Y	perfectly mapped
1252	7609059	7611385	2326	X1	perfectly mapped
1253	7611487	7613811	2324	unmappable	no match
1254	7613913	7616236	2323	3CEN	perfectly mapped
1255	7616338	7618658	2320	X1	perfectly mapped
1256	7618760	7621076	2316	X3/X4	perfectly mapped
1257	7621178	7623493	2315	X3/X4	perfectly mapped
1258	7623595	7625901	2306	Y	perfectly mapped
1259	7626003	7628309	2306	unmappable	no match
1260	7628411	7630716	2305	X1	perfectly mapped
1261	7630818	7631869	1051	unmappable	no match
1262	7632021	7633120	1099	Y	perfectly mapped
1263	7633222	7635523	2301	Y	perfectly mapped
1264	7635625	7637918	2293	3CEN	perfectly mapped
1265	7638020	7640313	2293	XY	perfectly mapped
1266	7640415	7642706	2291	X1	perfectly mapped
1267	7642808	7645097	2289	3CEN	perfectly mapped
1268	7645199	7647486	2287	X1	perfectly mapped
1269	7647588	7649873	2285	X1	perfectly mapped
1270	7649975	7652259	2284	X1	perfectly mapped
1271	7652361	7654643	2282	X3/X4	perfectly mapped
1272	7654745	7657026	2281	X1	perfectly mapped
1273	7657128	7659408	2280	X3/X4	perfectly mapped
1274	7659510	7661781	2271	X1	perfectly mapped
1275	7661883	7664151	2268	unmappable	no match
1276	7664253	7666520	2267	X1	perfectly mapped
1277	7666622	7668888	2266	3R	perfectly mapped
1278	7668990	7671254	2264	unmappable	no match
1279	7671356	7673613	2257	X1	perfectly mapped
1280	7673715	7674767	1052	X1	perfectly mapped
1281	7674789	7675972	1183	X1	perfectly mapped
1282	7676074	7678325	2251	3CEN	perfectly mapped
1283	7678427	7680673	2246	unmappable	no match
1284	7680775	7683020	2245	X1	perfectly mapped
1285	7683122	7685365	2243	unmappable	no match
1286	7685467	7687704	2237	2R5	perfectly mapped
1287	7687806	7690041	2235	X1	perfectly mapped
1288	7690143	7692375	2232	unmappable	no match
1289	7692477	7694708	2231	3R	perfectly mapped
1290	7694810	7697040	2230	Y	perfectly mapped
1291	7697142	7699372	2230	unmappable	no match
1292	7699474	7701700	2226	X1	perfectly mapped
1293	7701802	7704027	2225	unmappable	no match
1294	7704129	7706351	2222	unmappable	no match
1295	7706453	7708674	2221	X4	perfectly mapped
1296	7708776	7710995	2219	3CEN	perfectly mapped
1297	7711097	7713315	2218	X1	perfectly mapped
1298	7713417	7715632	2215	XY	perfectly mapped
1299	7715734	7717948	2214	unmappable	disagree
1300	7718050	7720258	2208	X1	perfectly mapped
1301	7720360	7722567	2207	X1	perfectly mapped
1302	7722669	7724874	2205	unmappable	no match
1303	7724976	7727180	2204	Y	perfectly mapped
1304	7727282	7729485	2203	unmappable	disagree
1305	7729587	7731787	2200	unmappable	no match
1306	7731889	7734088	2199	X1	perfectly mapped
1307	7734190	7736388	2198	3CEN	perfectly mapped
1308	7736490	7738686	2196	unmappable	disagree
1309	7738788	7740984	2196	3CEN	perfectly mapped
1310	7741086	7743280	2194	X1	perfectly mapped
1311	7743382	7745573	2191	unmappable	no match
1312	7745675	7747865	2190	X1	perfectly mapped
1313	7747967	7750155	2188	unmappable	no match
1314	7750257	7752444	2187	X1	perfectly mapped
1315	7752546	7754733	2187	X1	perfectly mapped
1316	7754835	7757020	2185	unmappable	no match
1317	7757122	7759305	2183	unmappable	no match
1318	7759407	7761589	2182	Y	perfectly mapped
1319	7761691	7763866	2175	X1	perfectly mapped
1320	7763968	7766142	2174	3CEN	perfectly mapped
1321	7766244	7768415	2171	unmappable	no match
1322	7768517	7770681	2164	X1	perfectly mapped
1323	7770783	7772944	2161	unmappable	no match
1324	7773046	7775205	2159	X1	perfectly mapped
1325	7775307	7777466	2159	unmappable	disagree
1326	7777568	7779724	2156	Y	perfectly mapped
1327	7779826	7781981	2155	XY	perfectly mapped
1328	7782083	7784228	2145	X1	perfectly mapped
1329	7784330	7786470	2140	Y	perfectly mapped
1330	7786572	7788709	2137	X3/X4	perfectly mapped
1331	7788811	7790943	2132	3R	perfectly mapped
1332	7791045	7793175	2130	X1	perfectly mapped
1333	7793277	7795407	2130	Y	perfectly mapped
1334	7795509	7797636	2127	unmappable	disagree
1335	7797738	7799863	2125	unmappable	no match
1336	7799965	7802089	2124	X1	perfectly mapped
1337	7802191	7804313	2122	unmappable	no match
1338	7804415	7806537	2122	unmappable	no match
1339	7806639	7808756	2117	Y	perfectly mapped
1340	7808858	7810973	2115	unmappable	no match
1341	7811075	7813187	2112	X1	perfectly mapped
1342	7813289	7815400	2111	X1	perfectly mapped
1343	7815502	7817613	2111	X1	perfectly mapped
1344	7817715	7819826	2111	X1	perfectly mapped
1345	7819928	7822038	2110	unmappable	no match
1346	7822140	7824247	2107	X1	perfectly mapped
1347	7824349	7826455	2106	3CEN	perfectly mapped
1348	7826557	7828660	2103	unmappable	no match
1349	7828762	7830865	2103	unmappable	no match
1350	7830967	7833068	2101	3CEN	perfectly mapped
1351	7833170	7835270	2100	unmappable	no match
1352	7835372	7837470	2098	unmappable	no match
1353	7837572	7839669	2097	unmappable	no match
1354	7839771	7841865	2094	Y	perfectly mapped
1355	7841967	7844061	2094	X1	perfectly mapped
1356	7844163	7846255	2092	XY	perfectly mapped
1357	7846357	7848449	2092	X1	perfectly mapped
1358	7848551	7850641	2090	unmappable	no match
1359	7850743	7852831	2088	unmappable	no match
1360	7852933	7855020	2087	X1	perfectly mapped
1361	7855122	7857208	2086	unmappable	no match
1362	7857310	7859395	2085	unmappable	no match
1363	7859497	7861582	2085	X1	perfectly mapped
1364	7861684	7863768	2084	Y	perfectly mapped
1365	7863870	7865954	2084	XY	perfectly mapped
1366	7866056	7868138	2082	unmappable	no match
1367	7868240	7870322	2082	3CEN	perfectly mapped
1368	7870424	7872504	2080	unmappable	no match
1369	7872606	7874685	2079	unmappable	no match
1370	7874787	7876864	2077	X1	perfectly mapped
1371	7876966	7879043	2077	unmappable	disagree
1372	7879145	7881221	2076	X1	perfectly mapped
1373	7881323	7883397	2074	unmappable	no match
1374	7883499	7885569	2070	unmappable	no match
1375	7885671	7887737	2066	X4	perfectly mapped
1376	7887839	7889901	2062	unmappable	no match
1377	7890003	7892064	2061	unmappable	no match
1378	7892166	7894227	2061	Y	perfectly mapped
1379	7894329	7896389	2060	unmappable	no match
1380	7896491	7898549	2058	3R	perfectly mapped
1381	7898651	7900709	2058	X1	perfectly mapped
1382	7900811	7902869	2058	3CEN	perfectly mapped
1383	7902971	7905028	2057	unmappable	no match
1384	7905130	7907178	2048	unmappable	no match
1385	7907280	7909324	2044	3CEN	perfectly mapped
1386	7909426	7911469	2043	unmappable	no match
1387	7911571	7913613	2042	X1	perfectly mapped
1388	7913715	7915756	2041	unmappable	no match
1389	7915858	7917893	2035	Y	perfectly mapped
1390	7917995	7920028	2033	X1	perfectly mapped
1391	7920130	7922161	2031	unmappable	no match
1392	7922263	7924294	2031	unmappable	no match
1393	7924396	7926424	2028	unmappable	no match
1394	7926526	7928551	2025	unmappable	no match
1395	7928653	7930675	2022	unmappable	no match
1396	7930777	7932796	2019	X1	perfectly mapped
1397	7932898	7934916	2018	unmappable	no match
1398	7935018	7937033	2015	unmappable	no match
1399	7937135	7939147	2012	unmappable	disagree
1400	7939249	7941257	2008	2CEN	perfectly mapped
1401	7941359	7943366	2007	X1	perfectly mapped
1402	7943468	7945474	2006	unmappable	no match
1403	7945576	7947580	2004	unmappable	no match
1404	7947682	7949686	2004	unmappable	disagree
1405	7949788	7951791	2003	Y	perfectly mapped
1406	7951893	7953896	2003	unmappable	no match
1407	7953998	7956000	2002	unmappable	no match
1408	7956102	7958101	1999	unmappable	no match
1409	7958203	7960199	1996	unmappable	no match
1410	7960301	7962297	1996	X1	perfectly mapped
1411	7962399	7964395	1996	unmappable	no match
1412	7964497	7966490	1993	unmappable	disagree
1413	7966592	7968583	1991	X1	perfectly mapped
1414	7968685	7970673	1988	2L	perfectly mapped
1415	7970775	7972763	1988	Y	perfectly mapped
1416	7972865	7974851	1986	unmappable	no match
1417	7974953	7976937	1984	X1	perfectly mapped
1418	7977039	7979023	1984	unmappable	no match
1419	7979125	7981103	1978	X1	perfectly mapped
1420	7981205	7983181	1976	X1	perfectly mapped
1421	7983283	7985257	1974	unmappable	no match
1422	7985359	7987333	1974	unmappable	no match
1423	7987435	7989408	1973	unmappable	no match
1424	7989510	7991482	1972	Y	perfectly mapped
1425	7991584	7993552	1968	X1	perfectly mapped
1426	7993654	7995618	1964	unmappable	no match
1427	7995720	7997684	1964	unmappable	no match
1428	7997786	7999750	1964	2R6	perfectly mapped
1429	7999852	8001815	1963	unmappable	no match
1430	8001917	8003879	1962	unmappable	no match
1431	8003981	8005943	1962	X1	perfectly mapped
1432	8006045	8008006	1961	X3	perfectly mapped
1433	8008108	8010068	1960	XY	perfectly mapped
1434	8010170	8012130	1960	unmappable	no match
1435	8012232	8014192	1960	unmappable	no match
1436	8014294	8016253	1959	Y	perfectly mapped
1437	8016355	8018314	1959	unmappable	no match
1438	8018416	8020375	1959	unmappable	no match
1439	8020477	8022431	1954	X1	perfectly mapped
1440	8022533	8024487	1954	unmappable	no match
1441	8024589	8026534	1945	unmappable	no match
1442	8026636	8028581	1945	X1	perfectly mapped
1443	8028683	8030628	1945	Y	perfectly mapped
1444	8030730	8032674	1944	Y	perfectly mapped
1445	8032776	8034719	1943	unmappable	no match
1446	8034821	8036763	1942	X1	perfectly mapped
1447	8036865	8038806	1941	unmappable	disagree
1448	8038908	8040845	1937	X1	perfectly mapped
1449	8040947	8042884	1937	unmappable	no match
1450	8042986	8044922	1936	Y	perfectly mapped
1451	8045024	8046958	1934	X1	perfectly mapped
1452	8047060	8048994	1934	unmappable	no match
1453	8049096	8051029	1933	X1	perfectly mapped
1454	8051131	8053062	1931	X1	perfectly mapped
1455	8053164	8055095	1931	unmappable	no match
1456	8055197	8057126	1929	unmappable	no match
1457	8057228	8059155	1927	unmappable	no match
1458	8059257	8061183	1926	X1	perfectly mapped
1459	8061285	8063211	1926	unmappable	no match
1460	8063313	8065238	1925	X1	perfectly mapped
1461	8065340	8067264	1924	unmappable	no match
1462	8067366	8069290	1924	unmappable	no match
1463	8069392	8071314	1922	unmappable	no match
1464	8071416	8073337	1921	unmappable	no match
1465	8073439	8075357	1918	X1	perfectly mapped
1466	8075459	8077374	1915	unmappable	no match
1467	8077476	8079391	1915	Y	perfectly mapped
1468	8079493	8081407	1914	X1	perfectly mapped
1469	8081509	8083423	1914	X2	perfectly mapped
1470	8083525	8085430	1905	unmappable	no match
1471	8085532	8087436	1904	X1	perfectly mapped
1472	8087538	8089441	1903	unmappable	no match
1473	8089543	8091445	1902	X1	perfectly mapped
1474	8091547	8093448	1901	unmappable	no match
1475	8093550	8095451	1901	X	perfectly mapped
1476	8095553	8097454	1901	X3/X4	perfectly mapped
1477	8097556	8099456	1900	X1	perfectly mapped
1478	8099558	8101457	1899	unmappable	no match
1479	8101559	8103457	1898	3CEN	perfectly mapped
1480	8103559	8105457	1898	unmappable	disagree
1481	8105559	8107456	1897	X1	perfectly mapped
1482	8107558	8109451	1893	X1	perfectly mapped
1483	8109553	8111446	1893	X1	perfectly mapped
1484	8111548	8113439	1891	unmappable	no match
1485	8113541	8115430	1889	X1	perfectly mapped
1486	8115532	8117420	1888	unmappable	no match
1487	8117522	8119410	1888	Y	perfectly mapped
1488	8119512	8121398	1886	3R	perfectly mapped
1489	8121500	8123386	1886	X1	perfectly mapped
1490	8123488	8125368	1880	unmappable	no match
1491	8125470	8127340	1870	unmappable	no match
1492	8127442	8129312	1870	unmappable	no match
1493	8129414	8131283	1869	X1	perfectly mapped
1494	8131385	8133253	1868	unmappable	no match
1495	8133355	8135223	1868	X1	perfectly mapped
1496	8135325	8137192	1867	X1	perfectly mapped
1497	8137294	8139161	1867	unmappable	no match
1498	8139263	8141130	1867	X1	perfectly mapped
1499	8141232	8143098	1866	X1	perfectly mapped
1500	8143200	8145063	1863	X1	perfectly mapped
1501	8145165	8147026	1861	3CEN	perfectly mapped
1502	8147128	8148989	1861	Y	perfectly mapped
1503	8149091	8150945	1854	X1	perfectly mapped
1504	8151047	8152899	1852	unmappable	no match
1505	8153001	8154850	1849	unmappable	no match
1506	8154952	8156799	1847	3CEN	perfectly mapped
1507	8156901	8158742	1841	X1	perfectly mapped
1508	8158844	8160685	1841	unmappable	no match
1509	8160787	8162628	1841	X1	perfectly mapped
1510	8162730	8164571	1841	X1	perfectly mapped
1511	8164673	8166513	1840	X1	perfectly mapped
1512	8166615	8168454	1839	X1	perfectly mapped
1513	8168556	8170395	1839	X1	perfectly mapped
1514	8170497	8172327	1830	3CEN	perfectly mapped
1515	8172429	8174259	1830	unmappable	no match
1516	8174361	8176189	1828	X1	perfectly mapped
1517	8176291	8178118	1827	X1	perfectly mapped
1518	8178220	8180047	1827	X1	perfectly mapped
1519	8180149	8181973	1824	unmappable	no match
1520	8182075	8183892	1817	unmappable	no match
1521	8183994	8185810	1816	X1	perfectly mapped
1522	8185912	8187728	1816	X1	perfectly mapped
1523	8187830	8189641	1811	X1	perfectly mapped
1524	8189743	8191554	1811	X3	perfectly mapped
1525	8191656	8193462	1806	Y	perfectly mapped
1526	8193564	8195369	1805	Y	perfectly mapped
1527	8195471	8197275	1804	3CEN	perfectly mapped
1528	8197377	8199178	1801	X2	perfectly mapped
1529	8199280	8201080	1800	unmappable	no match
1530	8201182	8202981	1799	unmappable	no match
1531	8203083	8204881	1798	X1	perfectly mapped
1532	8204983	8206781	1798	XY	perfectly mapped
1533	8206883	8208679	1796	X1	perfectly mapped
1534	8208781	8210576	1795	unmappable	no match
1535	8210678	8212469	1791	X1	perfectly mapped
1536	8212571	8214361	1790	X1	perfectly mapped
1537	8214463	8216252	1789	Y	perfectly mapped
1538	8216354	8218139	1785	X1	perfectly mapped
1539	8218241	8220025	1784	X1	perfectly mapped
1540	8220127	8221911	1784	unmappable	no match
1541	8222013	8223796	1783	X1	perfectly mapped
1542	8223898	8225681	1783	unmappable	no match
1543	8225783	8227557	1774	3CEN	perfectly mapped
1544	8227659	8229432	1773	Y	perfectly mapped
1545	8229534	8231307	1773	3CEN	perfectly mapped
1546	8231409	8233182	1773	X1	perfectly mapped
1547	8233284	8235056	1772	unmappable	no match
1548	8235158	8236926	1768	unmappable	disagree
1549	8237028	8238795	1767	X3/X4	perfectly mapped
1550	8238897	8240661	1764	Y	perfectly mapped
1551	8240763	8242525	1762	unmappable	no match
1552	8242627	8244386	1759	unmappable	no match
1553	8244488	8246247	1759	unmappable	no match
1554	8246349	8248103	1754	Y	perfectly mapped
1555	8248205	8249957	1752	unmappable	no match
1556	8250059	8251808	1749	Y	perfectly mapped
1557	8251910	8253655	1745	X1	perfectly mapped
1558	8253757	8255502	1745	X1	perfectly mapped
1559	8255604	8257349	1745	3CEN	perfectly mapped
1560	8257451	8259192	1741	X1	perfectly mapped
1561	8259294	8261033	1739	X1	perfectly mapped
1562	8261135	8262871	1736	unmappable	no match
1563	8262973	8264708	1735	X1	perfectly mapped
1564	8264810	8266542	1732	unmappable	no match
1565	8266644	8268375	1731	unmappable	no match
1566	8268477	8270207	1730	unmappable	no match
1567	8270309	8272035	1726	unmappable	no match
1568	8272137	8273860	1723	unmappable	no match
1569	8273962	8275684	1722	unmappable	no match
1570	8275786	8277508	1722	X1	perfectly mapped
1571	8277610	8279327	1717	2R5	perfectly mapped
1572	8279429	8281146	1717	unmappable	no match
1573	8281248	8282962	1714	X1	perfectly mapped
1574	8283064	8284778	1714	unmappable	no match
1575	8284880	8286593	1713	2R2	perfectly mapped
1576	8286695	8288407	1712	unmappable	no match
1577	8288509	8290220	1711	X1	perfectly mapped
1578	8290322	8292032	1710	Y	mapped
1579	8292134	8293842	1708	X2	perfectly mapped
1580	8293944	8295652	1708	unmappable	no match
1581	8295754	8297461	1707	X1	perfectly mapped
1582	8297563	8299269	1706	X1	perfectly mapped
1583	8299371	8301073	1702	X1	perfectly mapped
1584	8301175	8302876	1701	unmappable	no match
1585	8302978	8304679	1701	X1	perfectly mapped
1586	8304781	8306475	1694	3CEN	perfectly mapped
1587	8306577	8308265	1688	Y	perfectly mapped
1588	8308367	8310055	1688	Y	perfectly mapped
1589	8310157	8311842	1685	unmappable	no match
1590	8311944	8313629	1685	X1	perfectly mapped
1591	8313731	8315414	1683	unmappable	no match
1592	8315516	8317197	1681	X1	perfectly mapped
1593	8317299	8318980	1681	Y	perfectly mapped
1594	8319082	8320763	1681	Y	perfectly mapped
1595	8320865	8322543	1678	X1	perfectly mapped
1596	8322645	8324322	1677	X1	perfectly mapped
1597	8324424	8326100	1676	X1	perfectly mapped
1598	8326202	8327875	1673	unmappable	no match
1599	8327977	8329642	1665	unmappable	no match
1600	8329744	8331405	1661	unmappable	no match
1601	8331507	8333162	1655	X1	perfectly mapped
1602	8333264	8334912	1648	2R1	perfectly mapped
1603	8335014	8336657	1643	X1	perfectly mapped
1604	8336759	8338400	1641	X1	perfectly mapped
1605	8338502	8340143	1641	unmappable	no match
1606	8340245	8341884	1639	unmappable	no match
1607	8341986	8343621	1635	X1	perfectly mapped
1608	8343723	8345358	1635	X1	perfectly mapped
1609	8345460	8347095	1635	Y	perfectly mapped
1610	8347197	8348831	1634	X2	perfectly mapped
1611	8348933	8350561	1628	X1	perfectly mapped
1612	8350663	8352290	1627	unmappable	no match
1613	8352392	8354015	1623	unmappable	no match
1614	8354117	8355740	1623	X1	perfectly mapped
1615	8355842	8357463	1621	X3/X4	perfectly mapped
1616	8357565	8359185	1620	X1	perfectly mapped
1617	8359287	8360906	1619	unmappable	no match
1618	8361008	8362627	1619	unmappable	no match
1619	8362729	8364346	1617	Y	perfectly mapped
1620	8364448	8366060	1612	XY	perfectly mapped
1621	8366162	8367773	1611	Y	perfectly mapped
1622	8367875	8369484	1609	unmappable	no match
1623	8369586	8371194	1608	unmappable	no match
1624	8371296	8372904	1608	unmappable	no match
1625	8373006	8374614	1608	unmappable	no match
1626	8374716	8376322	1606	unmappable	no match
1627	8376424	8378019	1595	unmappable	no match
1628	8378121	8379714	1593	X1	perfectly mapped
1629	8379816	8381408	1592	unmappable	no match
1630	8381510	8383096	1586	X4	perfectly mapped
1631	8383198	8384782	1584	3CEN	perfectly mapped
1632	8384884	8386468	1584	X4	perfectly mapped
1633	8386570	8388154	1584	unmappable	no match
1634	8388256	8389835	1579	unmappable	no match
1635	8389937	8391512	1575	3CEN	perfectly mapped
1636	8391614	8393189	1575	X1	perfectly mapped
1637	8393291	8394864	1573	X1	perfectly mapped
1638	8394966	8396537	1571	X1	perfectly mapped
1639	8396639	8398208	1569	unmappable	no match
1640	8398310	8399875	1565	unmappable	no match
1641	8399977	8401541	1564	XY	perfectly mapped
1642	8401643	8403201	1558	unmappable	no match
1643	8403303	8404861	1558	X1	perfectly mapped
1644	8404963	8406519	1556	X1	perfectly mapped
1645	8406621	8408175	1554	X	mapped
1646	8408277	8409831	1554	X1	perfectly mapped
1647	8409933	8411486	1553	unmappable	disagree
1648	8411588	8413139	1551	unmappable	no match
1649	8413241	8414791	1550	unmappable	no match
1650	8414893	8416441	1548	X3/X4	perfectly mapped
1651	8416543	8418091	1548	unmappable	no match
1652	8418193	8419740	1547	3CEN	perfectly mapped
1653	8419842	8421386	1544	X1	perfectly mapped
1654	8421488	8423030	1542	X1	perfectly mapped
1655	8423132	8424673	1541	unmappable	no match
1656	8424775	8426316	1541	unmappable	no match
1657	8426418	8427957	1539	unmappable	disagree
1658	8428059	8429598	1539	X1	perfectly mapped
1659	8429700	8431238	1538	unmappable	no match
1660	8431340	8432878	1538	Y	perfectly mapped
1661	8432980	8434516	1536	unmappable	disagree
1662	8434618	8436150	1532	X	perfectly mapped
1663	8436252	8437783	1531	unmappable	no match
1664	8437885	8439416	1531	unmappable	disagree
1665	8439518	8441048	1530	unmappable	no match
1666	8441150	8442677	1527	X1	perfectly mapped
1667	8442779	8444304	1525	unmappable	no match
1668	8444406	8445931	1525	unmappable	no match
1669	8446033	8447556	1523	XY	perfectly mapped
1670	8447658	8449181	1523	Y	perfectly mapped
1671	8449283	8450806	1523	X1	perfectly mapped
1672	8450908	8452428	1520	Y	perfectly mapped
1673	8452530	8454049	1519	unmappable	no match
1674	8454151	8455669	1518	unmappable	no match
1675	8455771	8457289	1518	unmappable	disagree
1676	8457391	8458908	1517	X1	perfectly mapped
1677	8459010	8460526	1516	unmappable	no match
1678	8460628	8462142	1514	X1	perfectly mapped
1679	8462244	8463755	1511	3R	perfectly mapped
1680	8463857	8465365	1508	X1	perfectly mapped
1681	8465467	8466974	1507	X1	perfectly mapped
1682	8467076	8468582	1506	unmappable	no match
1683	8468684	8470186	1502	unmappable	no match
1684	8470288	8471790	1502	unmappable	no match
1685	8471892	8473392	1500	unmappable	no match
1686	8473494	8474986	1492	unmappable	no match
1687	8475088	8476578	1490	unmappable	no match
1688	8476680	8478170	1490	X1	perfectly mapped
1689	8478272	8479760	1488	unmappable	no match
1690	8479862	8481349	1487	X1	perfectly mapped
1691	8481451	8482937	1486	X1	perfectly mapped
1692	8483039	8484524	1485	3CEN	perfectly mapped
1693	8484626	8486111	1485	unmappable	no match
1694	8486213	8487696	1483	Y	perfectly mapped
1695	8487798	8489280	1482	unmappable	no match
1696	8489382	8490862	1480	X1	perfectly mapped
1697	8490964	8492441	1477	Y	perfectly mapped
1698	8492543	8494019	1476	X1	perfectly mapped
1699	8494121	8495595	1474	X1	perfectly mapped
1700	8495697	8497170	1473	unmappable	no match
1701	8497272	8498744	1472	unmappable	no match
1702	8498846	8500317	1471	unmappable	disagree
1703	8500419	8501888	1469	Y	perfectly mapped
1704	8501990	8503459	1469	unmappable	no match
1705	8503561	8505030	1469	unmappable	no match
1706	8505132	8506600	1468	unmappable	no match
1707	8506702	8508169	1467	unmappable	no match
1708	8508271	8509738	1467	Y	perfectly mapped
1709	8509840	8511306	1466	unmappable	no match
1710	8511408	8512873	1465	unmappable	no match
1711	8512975	8514439	1464	unmappable	no match
1712	8514541	8516003	1462	unmappable	no match
1713	8516105	8517566	1461	unmappable	no match
1714	8517668	8519128	1460	XY	perfectly mapped
1715	8519230	8520690	1460	unmappable	disagree
1716	8520792	8522251	1459	X1	perfectly mapped
1717	8522353	8523812	1459	unmappable	disagree
1718	8523914	8525371	1457	Y	perfectly mapped
1719	8525473	8526929	1456	XY	mapped
1720	8527031	8528485	1454	Y	perfectly mapped
1721	8528587	8530040	1453	unmappable	no match
1722	8530142	8531593	1451	X1	perfectly mapped
1723	8531695	8533145	1450	X1	perfectly mapped
1724	8533247	8534697	1450	X1	perfectly mapped
1725	8534799	8536248	1449	unmappable	no match
1726	8536350	8537798	1448	Y	perfectly mapped
1727	8537900	8539347	1447	unmappable	no match
1728	8539449	8540893	1444	unmappable	no match
1729	8540995	8542439	1444	unmappable	no match
1730	8542541	8543984	1443	3CEN	perfectly mapped
1731	8544086	8545527	1441	Y	perfectly mapped
1732	8545629	8547068	1439	X1	perfectly mapped
1733	8547170	8548608	1438	Y	perfectly mapped
1734	8548710	8550146	1436	unmappable	no match
1735	8550248	8551682	1434	unmappable	no match
1736	8551784	8553217	1433	unmappable	no match
1737	8553319	8554750	1431	unmappable	no match
1738	8554852	8556282	1430	unmappable	no match
1739	8556384	8557814	1430	X1	perfectly mapped
1740	8557916	8559346	1430	unmappable	no match
1741	8559448	8560876	1428	unmappable	no match
1742	8560978	8562406	1428	Y	perfectly mapped
1743	8562508	8563935	1427	Y	perfectly mapped
1744	8564037	8565464	1427	XY	perfectly mapped
1745	8565566	8566989	1423	X1	perfectly mapped
1746	8567091	8568513	1422	X1	perfectly mapped
1747	8568615	8570037	1422	unmappable	no match
1748	8570139	8571561	1422	unmappable	no match
1749	8571663	8573085	1422	unmappable	no match
1750	8573187	8574608	1421	X1	perfectly mapped
1751	8574710	8576130	1420	unmappable	no match
1752	8576232	8577651	1419	X1	perfectly mapped
1753	8577753	8579170	1417	X1	perfectly mapped
1754	8579272	8580686	1414	unmappable	no match
1755	8580788	8582202	1414	unmappable	no match
1756	8582304	8583718	1414	unmappable	no match
1757	8583820	8585233	1413	unmappable	no match
1758	8585335	8586745	1410	X1	perfectly mapped
1759	8586847	8588257	1410	unmappable	no match
1760	8588359	8589768	1409	unmappable	no match
1761	8589870	8591278	1408	unmappable	no match
1762	8591380	8592787	1407	Y	perfectly mapped
1763	8592889	8594295	1406	X1	perfectly mapped
1764	8594397	8595803	1406	unmappable	no match
1765	8595905	8597310	1405	XY	perfectly mapped
1766	8597412	8598816	1404	unmappable	no match
1767	8598918	8600320	1402	unmappable	no match
1768	8600422	8601824	1402	unmappable	no match
1769	8601926	8603328	1402	unmappable	no match
1770	8603430	8604830	1400	X3/X4	perfectly mapped
1771	8604932	8606330	1398	Y	perfectly mapped
1772	8606432	8607829	1397	unmappable	no match
1773	8607931	8609327	1396	unmappable	no match
1774	8609429	8610822	1393	unmappable	no match
1775	8610924	8612316	1392	unmappable	no match
1776	8612418	8613809	1391	Y	perfectly mapped
1777	8613911	8615301	1390	unmappable	no match
1778	8615403	8616792	1389	unmappable	no match
1779	8616894	8618283	1389	unmappable	no match
1780	8618385	8619774	1389	unmappable	no match
1781	8619876	8621265	1389	X3/X4	perfectly mapped
1782	8621367	8622756	1389	3CEN	perfectly mapped
1783	8622858	8624242	1384	unmappable	no match
1784	8624344	8625728	1384	X1	perfectly mapped
1785	8625830	8627213	1383	unmappable	no match
1786	8627315	8628697	1382	unmappable	disagree
1787	8628799	8630181	1382	unmappable	no match
1788	8630283	8631664	1381	Y	perfectly mapped
1789	8631766	8633146	1380	Y	perfectly mapped
1790	8633248	8634628	1380	unmappable	no match
1791	8634730	8636109	1379	unmappable	no match
1792	8636211	8637590	1379	X1	perfectly mapped
1793	8637692	8639070	1378	X1	perfectly mapped
1794	8639172	8640550	1378	unmappable	no match
1795	8640652	8642029	1377	unmappable	no match
1796	8642131	8643508	1377	unmappable	no match
1797	8643610	8644986	1376	3CEN	perfectly mapped
1798	8645088	8646463	1375	3CEN	perfectly mapped
1799	8646565	8647940	1375	unmappable	no match
1800	8648042	8649417	1375	unmappable	no match
1801	8649519	8650894	1375	unmappable	no match
1802	8650996	8652371	1375	unmappable	no match
1803	8652473	8653847	1374	X1	perfectly mapped
1804	8653949	8655323	1374	unmappable	no match
1805	8655425	8656799	1374	unmappable	no match
1806	8656901	8658274	1373	unmappable	no match
1807	8658376	8659749	1373	3CEN	perfectly mapped
1808	8659851	8661223	1372	unmappable	no match
1809	8661325	8662697	1372	unmappable	no match
1810	8662799	8664170	1371	unmappable	no match
1811	8664272	8665641	1369	unmappable	no match
1812	8665743	8667110	1367	unmappable	no match
1813	8667212	8668578	1366	Y	perfectly mapped
1814	8668680	8670046	1366	unmappable	disagree
1815	8670148	8671513	1365	unmappable	no match
1816	8671615	8672979	1364	2R5	perfectly mapped
1817	8673081	8674445	1364	unmappable	no match
1818	8674547	8675910	1363	XY	mapped
1819	8676012	8677372	1360	unmappable	no match
1820	8677474	8678833	1359	X3/X4	perfectly mapped
1821	8678935	8680293	1358	Y	perfectly mapped
1822	8680395	8681749	1354	Y	perfectly mapped
1823	8681851	8683205	1354	unmappable	no match
1824	8683307	8684660	1353	X1	perfectly mapped
1825	8684762	8686115	1353	Y	perfectly mapped
1826	8686217	8687570	1353	X1	perfectly mapped
1827	8687672	8689023	1351	Y	perfectly mapped
1828	8689125	8690475	1350	unmappable	no match
1829	8690577	8691927	1350	unmappable	no match
1830	8692029	8693378	1349	unmappable	no match
1831	8693480	8694826	1346	unmappable	no match
1832	8694928	8696273	1345	unmappable	no match
1833	8696375	8697720	1345	unmappable	no match
1834	8697822	8699166	1344	unmappable	no match
1835	8699268	8700610	1342	unmappable	no match
1836	8700712	8702053	1341	unmappable	no match
1837	8702155	8703494	1339	Y	perfectly mapped
1838	8703596	8704935	1339	2R2	perfectly mapped
1839	8705037	8706375	1338	unmappable	no match
1840	8706477	8707815	1338	unmappable	no match
1841	8707917	8709255	1338	X1	perfectly mapped
1842	8709357	8710694	1337	unmappable	no match
1843	8710796	8712133	1337	unmappable	no match
1844	8712235	8713572	1337	unmappable	no match
1845	8713674	8715009	1335	unmappable	no match
1846	8715111	8716446	1335	unmappable	no match
1847	8716548	8717882	1334	unmappable	no match
1848	8717984	8719318	1334	X1	perfectly mapped
1849	8719420	8720753	1333	unmappable	no match
1850	8720855	8722188	1333	unmappable	no match
1851	8722290	8723622	1332	unmappable	no match
1852	8723724	8725056	1332	unmappable	no match
1853	8725158	8726489	1331	unmappable	no match
1854	8726591	8727922	1331	unmappable	no match
1855	8728024	8729355	1331	Y	perfectly mapped
1856	8729457	8730787	1330	unmappable	no match
1857	8730889	8732217	1328	unmappable	no match
1858	8732319	8733647	1328	Y	perfectly mapped
1859	8733749	8735077	1328	unmappable	no match
1860	8735179	8736506	1327	XY	perfectly mapped
1861	8736608	8737934	1326	unmappable	no match
1862	8738036	8739361	1325	Y	perfectly mapped
1863	8739463	8740788	1325	unmappable	no match
1864	8740890	8742215	1325	X1	perfectly mapped
1865	8742317	8743641	1324	X1	perfectly mapped
1866	8743743	8745067	1324	X3/X4	perfectly mapped
1867	8745169	8746490	1321	unmappable	disagree
1868	8746592	8747913	1321	X1	perfectly mapped
1869	8748015	8749335	1320	Y	perfectly mapped
1870	8749437	8750757	1320	unmappable	no match
1871	8750859	8752175	1316	unmappable	disagree
1872	8752277	8753592	1315	Y	perfectly mapped
1873	8753694	8755008	1314	XY	perfectly mapped
1874	8755110	8756423	1313	X1	perfectly mapped
1875	8756525	8757838	1313	unmappable	no match
1876	8757940	8759253	1313	X3/X4	perfectly mapped
1877	8759355	8760668	1313	unmappable	no match
1878	8760770	8762080	1310	X1	perfectly mapped
1879	8762182	8763491	1309	XY	perfectly mapped
1880	8763593	8764902	1309	unmappable	no match
1881	8765004	8766313	1309	X3	perfectly mapped
1882	8766415	8767724	1309	unmappable	no match
1883	8767826	8769134	1308	X4	perfectly mapped
1884	8769236	8770544	1308	unmappable	no match
1885	8770646	8771954	1308	unmappable	no match
1886	8772056	8773363	1307	unmappable	no match
1887	8773465	8774772	1307	X2	perfectly mapped
1888	8774874	8776180	1306	unmappable	no match
1889	8776282	8777588	1306	unmappable	no match
1890	8777690	8778996	1306	XY	mapped
1891	8779098	8780402	1304	X3/X4	perfectly mapped
1892	8780504	8781806	1302	unmappable	no match
1893	8781908	8783210	1302	unmappable	no match
1894	8783312	8784614	1302	unmappable	no match
1895	8784716	8786018	1302	unmappable	no match
1896	8786120	8787422	1302	Y	perfectly mapped
1897	8787524	8788826	1302	unmappable	no match
1898	8788928	8790229	1301	2L	perfectly mapped
1899	8790331	8791632	1301	Y	perfectly mapped
1900	8791734	8793034	1300	unmappable	no match
1901	8793136	8794435	1299	XY	mapped
1902	8794537	8795836	1299	unmappable	no match
1903	8795938	8797237	1299	X2	perfectly mapped
1904	8797339	8798636	1297	Y	perfectly mapped
1905	8798738	8800033	1295	Y	perfectly mapped
1906	8800135	8801430	1295	unmappable	no match
1907	8801532	8802827	1295	Y	perfectly mapped
1908	8802929	8804223	1294	X1	perfectly mapped
1909	8804325	8805618	1293	X1	perfectly mapped
1910	8805720	8807012	1292	X3/X4	perfectly mapped
1911	8807114	8808406	1292	3CEN	perfectly mapped
1912	8808508	8809800	1292	unmappable	no match
1913	8809902	8811193	1291	unmappable	no match
1914	8811295	8812586	1291	unmappable	no match
1915	8812688	8813977	1289	unmappable	disagree
1916	8814079	8815368	1289	unmappable	no match
1917	8815470	8816758	1288	unmappable	no match
1918	8816860	8818147	1287	unmappable	no match
1919	8818249	8819535	1286	unmappable	no match
1920	8819637	8820922	1285	unmappable	no match
1921	8821024	8822309	1285	unmappable	no match
1922	8822411	8823696	1285	unmappable	no match
1923	8823798	8825082	1284	3CEN	perfectly mapped
1924	8825184	8826467	1283	unmappable	no match
1925	8826569	8827851	1282	X1	perfectly mapped
1926	8827953	8829235	1282	Y	perfectly mapped
1927	8829337	8830618	1281	Y	perfectly mapped
1928	8830720	8832001	1281	X1	perfectly mapped
1929	8832103	8833383	1280	Y	perfectly mapped
1930	8833485	8834764	1279	X3/X4	perfectly mapped
1931	8834866	8836144	1278	unmappable	no match
1932	8836246	8837524	1278	unmappable	disagree
1933	8837626	8838904	1278	unmappable	no match
1934	8839006	8840283	1277	unmappable	disagree
1935	8840385	8841662	1277	unmappable	no match
1936	8841764	8843040	1276	Y	perfectly mapped
1937	8843142	8844418	1276	XY	perfectly mapped
1938	8844520	8845796	1276	unmappable	no match
1939	8845898	8847174	1276	unmappable	no match
1940	8847276	8848551	1275	unmappable	no match
1941	8848653	8849928	1275	Y	perfectly mapped
1942	8850030	8851305	1275	unmappable	no match
1943	8851407	8852681	1274	unmappable	disagree
1944	8852783	8854056	1273	XY	perfectly mapped
1945	8854158	8855431	1273	unmappable	no match
1946	8855533	8856805	1272	unmappable	no match
1947	8856907	8858179	1272	unmappable	no match
1948	8858281	8859553	1272	unmappable	no match
1949	8859655	8860927	1272	unmappable	no match
1950	8861029	8862299	1270	unmappable	no match
1951	8862401	8863671	1270	unmappable	no match
1952	8863773	8865042	1269	X	perfectly mapped
1953	8865144	8866413	1269	unmappable	no match
1954	8866515	8867784	1269	unmappable	no match
1955	8867886	8869155	1269	Y	perfectly mapped
1956	8869257	8870526	1269	X1	perfectly mapped
1957	8870628	8871897	1269	X2	perfectly mapped
1958	8871999	8873268	1269	unmappable	no match
1959	8873370	8874638	1268	unmappable	no match
1960	8874740	8876008	1268	unmappable	no match
1961	8876110	8877378	1268	Y	perfectly mapped
1962	8877480	8878747	1267	X	perfectly mapped
1963	8878849	8880115	1266	X3/X4	perfectly mapped
1964	8880217	8881483	1266	Y	perfectly mapped
1965	8881585	8882849	1264	unmappable	disagree
1966	8882951	8884215	1264	unmappable	disagree
1967	8884317	8885580	1263	X4	perfectly mapped
1968	8885682	8886944	1262	unmappable	no match
1969	8887046	8888307	1261	unmappable	no match
1970	8888409	8889670	1261	unmappable	no match
1971	8889772	8891033	1261	unmappable	no match
1972	8891135	8892396	1261	unmappable	no match
1973	8892498	8893759	1261	Y	perfectly mapped
1974	8893861	8895121	1260	unmappable	no match
1975	8895223	8896483	1260	unmappable	no match
1976	8896585	8897845	1260	unmappable	no match
1977	8897947	8899207	1260	3CEN	perfectly mapped
1978	8899309	8900569	1260	unmappable	no match
1979	8900671	8901930	1259	unmappable	disagree
1980	8902032	8903291	1259	unmappable	no match
1981	8903393	8904651	1258	unmappable	no match
1982	8904753	8906011	1258	unmappable	no match
1983	8906113	8907371	1258	Y	perfectly mapped
1984	8907473	8908731	1258	Y	perfectly mapped
1985	8908833	8910091	1258	X	perfectly mapped
1986	8910193	8911450	1257	unmappable	no match
1987	8911552	8912808	1256	X1	perfectly mapped
1988	8912910	8914166	1256	unmappable	no match
1989	8914268	8915524	1256	unmappable	no match
1990	8915626	8916882	1256	X4	perfectly mapped
1991	8916984	8918239	1255	X3	perfectly mapped
1992	8918341	8919592	1251	unmappable	no match
1993	8919694	8920945	1251	X1	perfectly mapped
1994	8921047	8922297	1250	X1	perfectly mapped
1995	8922399	8923648	1249	unmappable	no match
1996	8923750	8924999	1249	unmappable	no match
1997	8925101	8926350	1249	X1	perfectly mapped
1998	8926452	8927701	1249	unmappable	no match
1999	8927803	8929051	1248	XY	perfectly mapped
[truncated: 922 more rows]
