# Supplementary material for: Mapping the pericentric heterochromatin by comparative genomic hybridization analysis and chromosome deletions in Drosophila melanogaster
Source: HighWire-hosted journal article supplement (doi:10.1101/gr.137406.112), 2012-06-28
Supplement: Supplemental_Table_5-Mapping_assignment_of_Uextra_contigs.xlsx [file Supplemental_Table_5-Mapping_assignment_of_Uextra_contigs.xlsx]

## Sheet: Sheet1
ContigID	Start	End	Length	MAP	Category
1	1	21021	21020	3R	perfectly mapped
2	21123	34301	13178	unmappable	disagree
3	34403	45267	10864	unmappable	no match
4	45369	55779	10410	unmappable	disagree
5	55881	65937	10056	unmappable	no match
6	66039	74590	8551	unmappable	no match
7	74692	83146	8454	3R	perfectly mapped
8	83248	90554	7306	unmappable	disagree
9	90656	97943	7287	unmappable	no match
10	98045	105314	7269	3R	perfectly mapped
11	105416	112679	7263	unmappable	no match
12	112781	119831	7050	3R	perfectly mapped
13	119933	126883	6950	unmappable	no match
14	126985	133097	6112	3CEN	mapped
15	133199	139250	6051	unmappable	no match
16	139352	145050	5698	unmappable	no match
17	145152	150680	5528	unmappable	no match
18	150782	156167	5385	3CEN	perfectly mapped
19	156269	161549	5280	3R	perfectly mapped
20	161651	166761	5110	3R	perfectly mapped
21	166863	171927	5064	unmappable	no match
22	172029	176874	4845	3R	perfectly mapped
23	176976	181668	4692	unmappable	no match
24	181770	186243	4473	unmappable	no match
25	186345	190788	4443	3R	perfectly mapped
26	190890	195295	4405	3R	perfectly mapped
27	195397	199792	4395	unmappable	disagree
28	199894	204185	4291	unmappable	no match
29	204287	208524	4237	2L	perfectly mapped
30	208626	212779	4153	unmappable	no match
31	212881	217016	4135	unmappable	no match
32	217118	221243	4125	unmappable	no match
33	221345	225382	4037	unmappable	no match
34	225484	229427	3943	3R	perfectly mapped
35	229529	233419	3890	3CEN	perfectly mapped
36	233521	237372	3851	unmappable	disagree
37	237474	241266	3792	unmappable	disagree
38	241368	245082	3714	unmappable	no match
39	245184	248892	3708	unmappable	no match
40	248994	252699	3705	unmappable	no match
41	252801	256489	3688	3R	perfectly mapped
42	256591	260146	3555	3CEN	perfectly mapped
43	260248	263771	3523	unmappable	disagree
44	263873	267366	3493	unmappable	no match
45	267468	270927	3459	unmappable	no match
46	271029	274453	3424	3CEN	mapped
47	274555	277864	3309	X4	perfectly mapped
48	277966	281243	3277	3R	perfectly mapped
49	281345	284619	3274	3R	perfectly mapped
50	284721	287964	3243	3R	perfectly mapped
51	288066	291282	3216	unmappable	no match
52	291384	294539	3155	3CEN	perfectly mapped
53	294641	297748	3107	3CEN	perfectly mapped
54	297850	300948	3098	3R	perfectly mapped
55	301050	304136	3086	unmappable	no match
56	304238	307294	3056	3R	perfectly mapped
57	307396	310446	3050	unmappable	no match
58	310548	313562	3014	3R	perfectly mapped
59	313664	316663	2999	unmappable	no match
60	316765	319738	2973	unmappable	disagree
61	319840	322813	2973	unmappable	no match
62	322915	325858	2943	unmappable	no match
63	325960	328875	2915	unmappable	disagree
64	328977	331862	2885	3CEN	perfectly mapped
65	331964	334786	2822	unmappable	disagree
66	334888	337685	2797	3CEN	perfectly mapped
67	337787	340505	2718	unmappable	no match
68	340607	343304	2697	unmappable	no match
69	343406	346060	2654	unmappable	no match
70	346162	348787	2625	unmappable	no match
71	348889	351481	2592	unmappable	no match
72	351583	354149	2566	unmappable	no match
73	354251	356800	2549	unmappable	no match
74	356902	359433	2531	unmappable	no match
75	359535	362041	2506	unmappable	no match
76	362143	364607	2464	unmappable	no match
77	364709	367160	2451	unmappable	no match
78	367262	369683	2421	unmappable	no match
79	369785	372199	2414	unmappable	no match
80	372301	374700	2399	unmappable	no match
81	374802	377193	2391	unmappable	no match
82	377295	379645	2350	3CEN	perfectly mapped
83	379747	382097	2350	Y	perfectly mapped
84	382199	384490	2291	3R	perfectly mapped
85	384592	386881	2289	unmappable	no match
86	386983	389237	2254	3CEN	perfectly mapped
87	389339	391571	2232	3R	perfectly mapped
88	391673	393809	2136	X3/X4	perfectly mapped
89	393911	396038	2127	unmappable	no match
90	396140	398266	2126	2R	perfectly mapped
91	398368	400471	2103	unmappable	no match
92	400573	402663	2090	unmappable	no match
93	402765	404845	2080	unmappable	no match
94	404947	407023	2076	unmappable	no match
95	407125	409197	2072	unmappable	no match
96	409299	411363	2064	unmappable	no match
97	411465	413527	2062	3R	perfectly mapped
98	413629	415681	2052	unmappable	no match
99	415783	417813	2030	3R	perfectly mapped
100	417915	419944	2029	X2	perfectly mapped
101	420046	422023	1977	unmappable	no match
102	422125	424100	1975	unmappable	no match
103	424202	426177	1975	unmappable	no match
104	426279	428244	1965	unmappable	no match
105	428346	430263	1917	unmappable	no match
106	430365	432271	1906	unmappable	no match
107	432373	434279	1906	unmappable	no match
108	434381	436280	1899	unmappable	no match
109	436382	438280	1898	unmappable	no match
110	438382	440256	1874	unmappable	no match
111	440358	442217	1859	unmappable	no match
112	442319	444171	1852	unmappable	no match
113	444273	446119	1846	unmappable	disagree
114	446221	448064	1843	unmappable	no match
115	448166	450006	1840	unmappable	no match
116	450108	451939	1831	unmappable	no match
117	452041	453869	1828	unmappable	no match
118	453971	455798	1827	unmappable	no match
119	455900	457726	1826	3CEN	perfectly mapped
120	457828	459653	1825	unmappable	no match
121	459755	461571	1816	unmappable	no match
122	461673	463487	1814	unmappable	no match
123	463589	465402	1813	unmappable	no match
124	465504	467311	1807	unmappable	no match
125	467413	469206	1793	unmappable	no match
126	469308	471100	1792	unmappable	no match
127	471202	472988	1786	2R6	perfectly mapped
128	473090	474876	1786	Y	perfectly mapped
129	474978	476754	1776	unmappable	no match
130	476856	478630	1774	unmappable	no match
131	478732	480503	1771	unmappable	disagree
132	480605	482374	1769	X3	perfectly mapped
133	482476	484242	1766	3R	perfectly mapped
134	484344	486106	1762	2R5	perfectly mapped
135	486208	487958	1750	unmappable	disagree
136	488060	489807	1747	XY	perfectly mapped
137	489909	491653	1744	unmappable	no match
138	491755	493498	1743	X2	perfectly mapped
139	493600	495339	1739	3R	perfectly mapped
140	495441	497179	1738	unmappable	no match
141	497281	499012	1731	unmappable	no match
142	499114	500844	1730	unmappable	no match
143	500946	502674	1728	3CEN	perfectly mapped
144	502776	504499	1723	3CEN	perfectly mapped
145	504601	506322	1721	3R	perfectly mapped
146	506424	508145	1721	unmappable	no match
147	508247	509966	1719	unmappable	disagree
148	510068	511786	1718	unmappable	no match
149	511888	513603	1715	unmappable	no match
150	513705	515417	1712	unmappable	no match
151	515519	517230	1711	unmappable	no match
152	517332	519042	1710	unmappable	no match
153	519144	520854	1710	unmappable	no match
154	520956	522665	1709	unmappable	disagree
155	522767	524472	1705	3CEN	perfectly mapped
156	524574	526278	1704	3CEN	perfectly mapped
157	526380	528082	1702	unmappable	no match
158	528184	529866	1682	XY	perfectly mapped
159	529968	531643	1675	unmappable	no match
160	531745	533411	1666	unmappable	no match
161	533513	535172	1659	unmappable	no match
162	535274	536932	1658	unmappable	no match
163	537034	538692	1658	3R	perfectly mapped
164	538794	540446	1652	unmappable	no match
165	540548	542199	1651	unmappable	no match
166	542301	543950	1649	X3	perfectly mapped
167	544052	545697	1645	3R	mapped
168	545799	547442	1643	unmappable	no match
169	547544	549176	1632	unmappable	disagree
170	549278	550907	1629	3R	perfectly mapped
171	551009	552635	1626	unmappable	no match
172	552737	554362	1625	unmappable	no match
173	554464	556072	1608	unmappable	no match
174	556174	557780	1606	X2	perfectly mapped
175	557882	559479	1597	unmappable	no match
176	559581	561177	1596	3R	perfectly mapped
177	561279	562870	1591	unmappable	no match
178	562972	564555	1583	XY	perfectly mapped
179	564657	566239	1582	unmappable	no match
180	566341	567923	1582	unmappable	no match
181	568025	569601	1576	unmappable	no match
182	569703	571275	1572	unmappable	no match
183	571377	572944	1567	unmappable	no match
184	573046	574606	1560	2R5	perfectly mapped
185	574708	576261	1553	Y	perfectly mapped
186	576363	577910	1547	X3	perfectly mapped
187	578012	579555	1543	unmappable	disagree
188	579657	581196	1539	unmappable	no match
189	581298	582833	1535	unmappable	disagree
190	582935	584463	1528	3R	perfectly mapped
191	584565	586093	1528	unmappable	no match
192	586195	587722	1527	unmappable	no match
193	587824	589350	1526	X3/X4	perfectly mapped
194	589452	590966	1514	unmappable	no match
195	591068	592579	1511	X2	perfectly mapped
196	592681	594185	1504	unmappable	disagree
197	594287	595789	1502	unmappable	no match
198	595891	597392	1501	Y	perfectly mapped
199	597494	598992	1498	unmappable	no match
200	599094	600590	1496	2L	perfectly mapped
201	600692	602186	1494	unmappable	no match
202	602288	603775	1487	unmappable	disagree
203	603877	605364	1487	unmappable	no match
204	605466	606950	1484	unmappable	no match
205	607052	608536	1484	unmappable	no match
206	608638	610117	1479	unmappable	no match
207	610219	611690	1471	3CEN	perfectly mapped
208	611792	613260	1468	X3	perfectly mapped
209	613362	614829	1467	2R2	perfectly mapped
210	614931	616397	1466	unmappable	no match
211	616499	617964	1465	Y	perfectly mapped
212	618066	619531	1465	X4	perfectly mapped
213	619633	621095	1462	unmappable	no match
214	621197	622656	1459	unmappable	no match
215	622758	624216	1458	unmappable	no match
216	624318	625774	1456	3R	perfectly mapped
217	625876	627330	1454	unmappable	disagree
218	627432	628884	1452	unmappable	no match
219	628986	630436	1450	unmappable	no match
220	630538	631987	1449	unmappable	no match
221	632089	633533	1444	unmappable	no match
222	633635	635077	1442	3CEN	perfectly mapped
223	635179	636619	1440	3CEN	perfectly mapped
224	636721	638160	1439	unmappable	no match
225	638262	639697	1435	X4	perfectly mapped
226	639799	641227	1428	3CEN	perfectly mapped
227	641329	642756	1427	3R	perfectly mapped
228	642858	644282	1424	3CEN	perfectly mapped
229	644384	645806	1422	3CEN	perfectly mapped
230	645908	647328	1420	3CEN	perfectly mapped
231	647430	648849	1419	3CEN	perfectly mapped
232	648951	650369	1418	3CEN	perfectly mapped
233	650471	651885	1414	3R	perfectly mapped
234	651987	653400	1413	2R	perfectly mapped
235	653502	654909	1407	3CEN	perfectly mapped
236	655011	656417	1406	X3/X4	perfectly mapped
237	656519	657925	1406	Y	perfectly mapped
238	658027	659428	1401	unmappable	no match
239	659530	660929	1399	3CEN	perfectly mapped
240	661031	662428	1397	3R	perfectly mapped
241	662530	663927	1397	unmappable	no match
242	664029	665426	1397	unmappable	no match
243	665528	666924	1396	unmappable	no match
244	667026	668421	1395	X3/X4	perfectly mapped
245	668523	669913	1390	unmappable	no match
246	670015	671405	1390	unmappable	no match
247	671507	672894	1387	3CEN	perfectly mapped
248	672996	674382	1386	2R5	perfectly mapped
249	674484	675869	1385	unmappable	no match
250	675971	677353	1382	3CEN	perfectly mapped
251	677455	678835	1380	unmappable	no match
252	678937	680316	1379	unmappable	disagree
253	680418	681796	1378	3R	mapped
254	681898	683276	1378	X3/X4	perfectly mapped
255	683378	684755	1377	unmappable	no match
256	684857	686232	1375	unmappable	no match
257	686334	687709	1375	unmappable	no match
258	687811	689183	1372	unmappable	no match
259	689285	690655	1370	Y	perfectly mapped
260	690757	692126	1369	3R	mapped
261	692228	693595	1367	unmappable	no match
262	693697	695063	1366	unmappable	no match
263	695165	696531	1366	unmappable	no match
264	696633	697998	1365	X3/X4	perfectly mapped
265	698100	699463	1363	unmappable	no match
266	699565	700926	1361	3R	perfectly mapped
267	701028	702388	1360	unmappable	no match
268	702490	703849	1359	3R	perfectly mapped
269	703951	705310	1359	unmappable	no match
270	705412	706770	1358	unmappable	no match
271	706872	708229	1357	X2	perfectly mapped
272	708331	709688	1357	unmappable	no match
273	709790	711147	1357	X4	perfectly mapped
274	711249	712605	1356	unmappable	no match
275	712707	714062	1355	unmappable	no match
276	714164	715519	1355	3CEN	perfectly mapped
277	715621	716974	1353	unmappable	no match
278	717076	718429	1353	unmappable	no match
279	718531	719881	1350	3L	perfectly mapped
280	719983	721332	1349	unmappable	no match
281	721434	722783	1349	2R5	perfectly mapped
282	722885	724232	1347	2R6	perfectly mapped
283	724334	725681	1347	unmappable	disagree
284	725783	727129	1346	unmappable	no match
285	727231	728577	1346	X3/X4	perfectly mapped
286	728679	730023	1344	2R	perfectly mapped
287	730125	731469	1344	unmappable	no match
288	731571	732914	1343	unmappable	disagree
289	733016	734358	1342	unmappable	no match
290	734460	735800	1340	3CEN	perfectly mapped
291	735902	737240	1338	unmappable	no match
292	737342	738680	1338	unmappable	no match
293	738782	740119	1337	X4	perfectly mapped
294	740221	741558	1337	unmappable	no match
295	741660	742997	1337	2R	perfectly mapped
296	743099	744436	1337	unmappable	no match
297	744538	745873	1335	unmappable	no match
298	745975	747310	1335	unmappable	no match
299	747412	748744	1332	unmappable	no match
300	748846	750174	1328	unmappable	no match
301	750276	751604	1328	unmappable	no match
302	751706	753033	1327	unmappable	no match
303	753135	754462	1327	unmappable	no match
304	754564	755891	1327	3R	perfectly mapped
305	755993	757319	1326	3R	perfectly mapped
306	757421	758746	1325	unmappable	no match
307	758848	760172	1324	X2	perfectly mapped
308	760274	761595	1321	3CEN	perfectly mapped
309	761697	763017	1320	unmappable	no match
310	763119	764438	1319	unmappable	no match
311	764540	765859	1319	3R	perfectly mapped
312	765961	767279	1318	3CEN	perfectly mapped
313	767381	768698	1317	unmappable	no match
314	768800	770117	1317	3CEN	perfectly mapped
315	770219	771535	1316	3R	perfectly mapped
316	771637	772952	1315	unmappable	no match
317	773054	774369	1315	unmappable	no match
318	774471	775785	1314	unmappable	no match
319	775887	777201	1314	X4	perfectly mapped
320	777303	778615	1312	2R	perfectly mapped
321	778717	780029	1312	unmappable	no match
322	780131	781443	1312	unmappable	no match
323	781545	782855	1310	unmappable	no match
324	782957	784265	1308	unmappable	no match
325	784367	785673	1306	3R	perfectly mapped
326	785775	787081	1306	X3/X4	perfectly mapped
327	787183	788488	1305	2R	perfectly mapped
328	788590	789895	1305	2R	perfectly mapped
329	789997	791301	1304	X4	perfectly mapped
330	791403	792706	1303	3L	perfectly mapped
331	792808	794111	1303	unmappable	no match
332	794213	795516	1303	unmappable	no match
333	795618	796921	1303	unmappable	no match
334	797023	798325	1302	3CEN	perfectly mapped
335	798427	799729	1302	X2	perfectly mapped
336	799831	801132	1301	unmappable	no match
337	801234	802535	1301	unmappable	no match
338	802637	803938	1301	X2	perfectly mapped
339	804040	805340	1300	X3	perfectly mapped
340	805442	806742	1300	X3/X4	perfectly mapped
341	806844	808144	1300	unmappable	no match
342	808246	809546	1300	unmappable	no match
343	809648	810947	1299	unmappable	disagree
344	811049	812347	1298	Y	perfectly mapped
345	812449	813746	1297	unmappable	no match
346	813848	815142	1294	2R	perfectly mapped
347	815244	816537	1293	X3	perfectly mapped
348	816639	817932	1293	unmappable	no match
349	818034	819326	1292	3L	perfectly mapped
350	819428	820720	1292	3CEN	perfectly mapped
351	820822	822111	1289	unmappable	no match
352	822213	823502	1289	unmappable	no match
353	823604	824892	1288	X4	perfectly mapped
354	824994	826282	1288	X3/X4	perfectly mapped
355	826384	827671	1287	X	perfectly mapped
356	827773	829059	1286	3R	perfectly mapped
357	829161	830446	1285	X3/X4	perfectly mapped
358	830548	831832	1284	X3	perfectly mapped
359	831934	833217	1283	unmappable	no match
360	833319	834602	1283	unmappable	no match
361	834704	835987	1283	unmappable	no match
362	836089	837371	1282	2L	perfectly mapped
363	837473	838754	1281	unmappable	no match
364	838856	840137	1281	unmappable	no match
365	840239	841520	1281	unmappable	no match
366	841622	842903	1281	X4	perfectly mapped
367	843005	844286	1281	X3/X4	perfectly mapped
368	844388	845668	1280	3CEN	perfectly mapped
369	845770	847049	1279	unmappable	no match
370	847151	848428	1277	unmappable	no match
371	848530	849807	1277	unmappable	no match
372	849909	851185	1276	X3	perfectly mapped
373	851287	852563	1276	unmappable	no match
374	852665	853940	1275	3CEN	perfectly mapped
375	854042	855317	1275	unmappable	no match
376	855419	856693	1274	3R	perfectly mapped
377	856795	858069	1274	Y	perfectly mapped
378	858171	859445	1274	3L	perfectly mapped
379	859547	860821	1274	unmappable	no match
380	860923	862196	1273	unmappable	no match
381	862298	863571	1273	X1	perfectly mapped
382	863673	864945	1272	unmappable	no match
383	865047	866319	1272	unmappable	no match
384	866421	867692	1271	unmappable	no match
385	867794	869065	1271	X1	perfectly mapped
386	869167	870437	1270	3CEN	perfectly mapped
387	870539	871809	1270	2L	perfectly mapped
388	871911	873180	1269	unmappable	no match
389	873282	874550	1268	unmappable	no match
390	874652	875920	1268	unmappable	no match
391	876022	877290	1268	unmappable	no match
392	877392	878659	1267	unmappable	no match
393	878761	880028	1267	unmappable	no match
394	880130	881397	1267	3R	perfectly mapped
395	881499	882765	1266	unmappable	no match
396	882867	884133	1266	3CEN	perfectly mapped
397	884235	885501	1266	X4	perfectly mapped
398	885603	886868	1265	X3/X4	perfectly mapped
399	886970	888235	1265	X	perfectly mapped
400	888337	889601	1264	2CEN	perfectly mapped
401	889703	890967	1264	2R	perfectly mapped
402	891069	892332	1263	3CEN	perfectly mapped
403	892434	893696	1262	X4	perfectly mapped
404	893798	895060	1262	unmappable	no match
405	895162	896424	1262	Y	perfectly mapped
406	896526	897787	1261	unmappable	no match
407	897889	899149	1260	X4	perfectly mapped
408	899251	900511	1260	unmappable	no match
409	900613	901872	1259	X4	perfectly mapped
410	901974	903233	1259	X3	perfectly mapped
411	903335	904594	1259	3CEN	perfectly mapped
412	904696	905954	1258	X3/X4	perfectly mapped
413	906056	907311	1255	Y	perfectly mapped
414	907413	908668	1255	unmappable	no match
415	908770	910024	1254	unmappable	disagree
416	910126	911380	1254	unmappable	no match
417	911482	912736	1254	XY	perfectly mapped
418	912838	914091	1253	XY	perfectly mapped
419	914193	915445	1252	XY	perfectly mapped
420	915547	916799	1252	unmappable	no match
421	916901	918152	1251	unmappable	no match
422	918254	919505	1251	unmappable	no match
423	919607	920858	1251	3CEN	perfectly mapped
424	920960	922210	1250	unmappable	no match
425	922312	923562	1250	3L	perfectly mapped
426	923664	924914	1250	unmappable	no match
427	925016	926266	1250	3L	perfectly mapped
428	926368	927618	1250	3R	perfectly mapped
429	927720	928969	1249	unmappable	no match
430	929071	930320	1249	X4	perfectly mapped
431	930422	931671	1249	unmappable	no match
432	931773	933021	1248	X4	perfectly mapped
433	933123	934371	1248	2R	perfectly mapped
434	934473	935720	1247	unmappable	no match
435	935822	937069	1247	unmappable	no match
436	937171	938418	1247	unmappable	disagree
437	938520	939767	1247	unmappable	no match
438	939869	941114	1245	X	perfectly mapped
439	941216	942461	1245	unmappable	no match
440	942563	943808	1245	unmappable	no match
441	943910	945155	1245	unmappable	no match
442	945257	946501	1244	unmappable	no match
443	946603	947847	1244	unmappable	no match
444	947949	949192	1243	3CEN	perfectly mapped
445	949294	950537	1243	unmappable	no match
446	950639	951882	1243	unmappable	no match
447	951984	953226	1242	unmappable	no match
448	953328	954570	1242	unmappable	disagree
449	954672	955914	1242	2R5	perfectly mapped
450	956016	957258	1242	unmappable	no match
451	957360	958601	1241	unmappable	disagree
452	958703	959944	1241	unmappable	no match
453	960046	961287	1241	unmappable	no match
454	961389	962630	1241	3CEN	perfectly mapped
455	962732	963973	1241	3CEN	perfectly mapped
456	964075	965316	1241	unmappable	no match
457	965418	966658	1240	unmappable	no match
458	966760	967999	1239	3CEN	perfectly mapped
459	968101	969340	1239	unmappable	no match
460	969442	970681	1239	unmappable	no match
461	970783	972022	1239	3R	perfectly mapped
462	972124	973361	1237	X3/X4	perfectly mapped
463	973463	974700	1237	unmappable	no match
464	974802	976039	1237	unmappable	no match
465	976141	977378	1237	Y	perfectly mapped
466	977480	978717	1237	unmappable	no match
467	978819	980055	1236	XY	perfectly mapped
468	980157	981393	1236	unmappable	no match
469	981495	982731	1236	unmappable	no match
470	982833	984069	1236	unmappable	no match
471	984171	985406	1235	X3/X4	perfectly mapped
472	985508	986742	1234	unmappable	no match
473	986844	988078	1234	X3	perfectly mapped
474	988180	989413	1233	3R	perfectly mapped
475	989515	990748	1233	3R	perfectly mapped
476	990850	992083	1233	3CEN	perfectly mapped
477	992185	993418	1233	unmappable	no match
478	993520	994753	1233	unmappable	no match
479	994855	996087	1232	X4	perfectly mapped
480	996189	997421	1232	unmappable	no match
481	997523	998755	1232	Y	perfectly mapped
482	998857	1000088	1231	X4	perfectly mapped
483	1000190	1001421	1231	unmappable	disagree
484	1001523	1002753	1230	unmappable	no match
485	1002855	1004084	1229	unmappable	no match
486	1004186	1005415	1229	3R	perfectly mapped
487	1005517	1006744	1227	X3/X4	perfectly mapped
488	1006846	1008073	1227	3CEN	perfectly mapped
489	1008175	1009401	1226	X1	perfectly mapped
490	1009503	1010728	1225	unmappable	no match
491	1010830	1012055	1225	unmappable	no match
492	1012157	1013382	1225	unmappable	no match
493	1013484	1014708	1224	X3/X4	perfectly mapped
494	1014810	1016034	1224	Y	perfectly mapped
495	1016136	1017360	1224	unmappable	no match
496	1017462	1018685	1223	unmappable	no match
497	1018787	1020010	1223	X3/X4	perfectly mapped
498	1020112	1021335	1223	3R	perfectly mapped
499	1021437	1022659	1222	unmappable	no match
500	1022761	1023982	1221	unmappable	disagree
501	1024084	1025305	1221	X	perfectly mapped
502	1025407	1026628	1221	3CEN	perfectly mapped
503	1026730	1027950	1220	unmappable	no match
504	1028052	1029272	1220	Y	perfectly mapped
505	1029374	1030594	1220	2R	perfectly mapped
506	1030696	1031915	1219	unmappable	no match
507	1032017	1033236	1219	2L	perfectly mapped
508	1033338	1034556	1218	Y	perfectly mapped
509	1034658	1035875	1217	3L	mapped
510	1035977	1037194	1217	unmappable	no match
511	1037296	1038513	1217	unmappable	no match
512	1038615	1039831	1216	3R	perfectly mapped
513	1039933	1041149	1216	X2	perfectly mapped
514	1041251	1042467	1216	Y	perfectly mapped
515	1042569	1043784	1215	unmappable	no match
516	1043886	1045101	1215	2R2	perfectly mapped
517	1045203	1046418	1215	unmappable	no match
518	1046520	1047735	1215	unmappable	no match
519	1047837	1049052	1215	unmappable	no match
520	1049154	1050367	1213	unmappable	no match
521	1050469	1051682	1213	unmappable	no match
522	1051784	1052997	1213	unmappable	no match
523	1053099	1054311	1212	X3/X4	perfectly mapped
524	1054413	1055625	1212	unmappable	no match
525	1055727	1056938	1211	unmappable	no match
526	1057040	1058251	1211	X4	perfectly mapped
527	1058353	1059563	1210	unmappable	no match
528	1059665	1060875	1210	unmappable	no match
529	1060977	1062186	1209	unmappable	no match
530	1062288	1063497	1209	X3	perfectly mapped
531	1063599	1064808	1209	2R2	perfectly mapped
532	1064910	1066118	1208	unmappable	no match
533	1066220	1067428	1208	X3	perfectly mapped
534	1067530	1068737	1207	unmappable	no match
535	1068839	1070046	1207	XY	perfectly mapped
536	1070148	1071355	1207	unmappable	no match
537	1071457	1072664	1207	X3/X4	perfectly mapped
538	1072766	1073973	1207	unmappable	no match
539	1074075	1075282	1207	3CEN	perfectly mapped
540	1075384	1076591	1207	unmappable	no match
541	1076693	1077900	1207	unmappable	no match
542	1078002	1079209	1207	unmappable	no match
543	1079311	1080517	1206	3CEN	perfectly mapped
544	1080619	1081825	1206	unmappable	no match
545	1081927	1083133	1206	3CEN	perfectly mapped
546	1083235	1084441	1206	X3/X4	perfectly mapped
547	1084543	1085749	1206	unmappable	no match
548	1085851	1087057	1206	unmappable	no match
549	1087159	1088365	1206	unmappable	no match
550	1088467	1089672	1205	unmappable	no match
551	1089774	1090979	1205	unmappable	no match
552	1091081	1092285	1204	2R6	perfectly mapped
553	1092387	1093591	1204	unmappable	disagree
554	1093693	1094896	1203	unmappable	no match
555	1094998	1096201	1203	2R5	perfectly mapped
556	1096303	1097506	1203	X4	perfectly mapped
557	1097608	1098810	1202	2L	perfectly mapped
558	1098912	1100114	1202	unmappable	no match
559	1100216	1101418	1202	unmappable	no match
560	1101520	1102722	1202	unmappable	no match
561	1102824	1104026	1202	3L	perfectly mapped
562	1104128	1105329	1201	unmappable	no match
563	1105431	1106631	1200	unmappable	no match
564	1106733	1107933	1200	2R1	perfectly mapped
565	1108035	1109235	1200	X3/X4	perfectly mapped
566	1109337	1110537	1200	X3/X4	perfectly mapped
567	1110639	1111838	1199	Y	perfectly mapped
568	1111940	1113138	1198	3CEN	perfectly mapped
569	1113240	1114438	1198	3R	perfectly mapped
570	1114540	1115738	1198	3R	perfectly mapped
571	1115840	1117037	1197	Y	perfectly mapped
572	1117139	1118336	1197	unmappable	disagree
573	1118438	1119635	1197	X4	perfectly mapped
574	1119737	1120934	1197	unmappable	no match
575	1121036	1122233	1197	2R	perfectly mapped
576	1122335	1123532	1197	unmappable	no match
577	1123634	1124830	1196	3L	perfectly mapped
578	1124932	1126128	1196	XY	perfectly mapped
579	1126230	1127426	1196	X1	perfectly mapped
580	1127528	1128723	1195	unmappable	no match
581	1128825	1130020	1195	Y	perfectly mapped
582	1130122	1131317	1195	3L	perfectly mapped
583	1131419	1132614	1195	unmappable	no match
584	1132716	1133910	1194	3CEN	perfectly mapped
585	1134012	1135206	1194	unmappable	no match
586	1135308	1136502	1194	unmappable	no match
587	1136604	1137798	1194	unmappable	no match
588	1137900	1139093	1193	3L	perfectly mapped
589	1139195	1140388	1193	X1	perfectly mapped
590	1140490	1141683	1193	unmappable	no match
591	1141785	1142978	1193	X3/X4	perfectly mapped
592	1143080	1144272	1192	unmappable	no match
593	1144374	1145566	1192	X2	perfectly mapped
594	1145668	1146860	1192	unmappable	no match
595	1146962	1148154	1192	2R6	perfectly mapped
596	1148256	1149448	1192	X4	perfectly mapped
597	1149550	1150741	1191	unmappable	no match
598	1150843	1152034	1191	unmappable	disagree
599	1152136	1153327	1191	unmappable	no match
600	1153429	1154620	1191	unmappable	no match
601	1154722	1155913	1191	X4	perfectly mapped
602	1156015	1157206	1191	2R	perfectly mapped
603	1157308	1158498	1190	unmappable	no match
604	1158600	1159790	1190	unmappable	no match
605	1159892	1161081	1189	unmappable	no match
606	1161183	1162372	1189	unmappable	no match
607	1162474	1163663	1189	3CEN	perfectly mapped
608	1163765	1164954	1189	unmappable	disagree
609	1165056	1166245	1189	unmappable	no match
610	1166347	1167535	1188	3CEN	perfectly mapped
611	1167637	1168825	1188	unmappable	no match
612	1168927	1170115	1188	unmappable	no match
613	1170217	1171405	1188	unmappable	no match
614	1171507	1172694	1187	3CEN	perfectly mapped
615	1172796	1173983	1187	2R2	perfectly mapped
616	1174085	1175272	1187	3CEN	perfectly mapped
617	1175374	1176560	1186	unmappable	no match
618	1176662	1177848	1186	unmappable	no match
619	1177950	1179136	1186	X2	perfectly mapped
620	1179238	1180424	1186	3R	perfectly mapped
621	1180526	1181712	1186	unmappable	no match
622	1181814	1183000	1186	unmappable	no match
623	1183102	1184287	1185	unmappable	no match
624	1184389	1185574	1185	unmappable	no match
625	1185676	1186860	1184	X	perfectly mapped
626	1186962	1188146	1184	unmappable	disagree
627	1188248	1189432	1184	unmappable	no match
628	1189534	1190718	1184	unmappable	no match
629	1190820	1192004	1184	Y	perfectly mapped
630	1192106	1193289	1183	3R	perfectly mapped
631	1193391	1194574	1183	Y	perfectly mapped
632	1194676	1195859	1183	unmappable	no match
633	1195961	1197143	1182	unmappable	no match
634	1197245	1198427	1182	unmappable	no match
635	1198529	1199711	1182	unmappable	no match
636	1199813	1200995	1182	2R2	perfectly mapped
637	1201097	1202279	1182	3R	perfectly mapped
638	1202381	1203562	1181	3R	perfectly mapped
639	1203664	1204845	1181	unmappable	no match
640	1204947	1206128	1181	unmappable	no match
641	1206230	1207411	1181	unmappable	no match
642	1207513	1208693	1180	unmappable	no match
643	1208795	1209975	1180	unmappable	no match
644	1210077	1211257	1180	3CEN	perfectly mapped
645	1211359	1212539	1180	unmappable	no match
646	1212641	1213820	1179	3CEN	perfectly mapped
647	1213922	1215101	1179	unmappable	no match
648	1215203	1216381	1178	unmappable	no match
649	1216483	1217661	1178	X1	perfectly mapped
650	1217763	1218941	1178	Y	perfectly mapped
651	1219043	1220221	1178	X2	perfectly mapped
652	1220323	1221500	1177	unmappable	no match
653	1221602	1222779	1177	2R5	perfectly mapped
654	1222881	1224058	1177	unmappable	disagree
655	1224160	1225336	1176	unmappable	no match
656	1225438	1226614	1176	Y	perfectly mapped
657	1226716	1227891	1175	unmappable	no match
658	1227993	1229168	1175	unmappable	no match
659	1229270	1230445	1175	unmappable	no match
660	1230547	1231721	1174	unmappable	no match
661	1231823	1232997	1174	3R	perfectly mapped
662	1233099	1234273	1174	unmappable	no match
663	1234375	1235549	1174	unmappable	no match
664	1235651	1236825	1174	unmappable	no match
665	1236927	1238100	1173	X4	perfectly mapped
666	1238202	1239375	1173	unmappable	no match
667	1239477	1240650	1173	unmappable	no match
668	1240752	1241925	1173	XY	perfectly mapped
669	1242027	1243199	1172	3R	perfectly mapped
670	1243301	1244473	1172	unmappable	no match
671	1244575	1245747	1172	unmappable	no match
672	1245849	1247021	1172	unmappable	no match
673	1247123	1248295	1172	unmappable	no match
674	1248397	1249569	1172	3CEN	perfectly mapped
675	1249671	1250843	1172	unmappable	no match
676	1250945	1252117	1172	unmappable	no match
677	1252219	1253390	1171	unmappable	no match
678	1253492	1254663	1171	3CEN	perfectly mapped
679	1254765	1255935	1170	3CEN	perfectly mapped
680	1256037	1257207	1170	unmappable	no match
681	1257309	1258479	1170	unmappable	no match
682	1258581	1259751	1170	X1	perfectly mapped
683	1259853	1261023	1170	unmappable	no match
684	1261125	1262295	1170	unmappable	no match
685	1262397	1263566	1169	unmappable	no match
686	1263668	1264837	1169	unmappable	no match
687	1264939	1266108	1169	3CEN	perfectly mapped
688	1266210	1267379	1169	3R	perfectly mapped
689	1267481	1268650	1169	unmappable	no match
690	1268752	1269921	1169	X1	perfectly mapped
691	1270023	1271191	1168	unmappable	no match
692	1271293	1272461	1168	unmappable	no match
693	1272563	1273731	1168	unmappable	no match
694	1273833	1275001	1168	unmappable	no match
695	1275103	1276270	1167	unmappable	no match
696	1276372	1277539	1167	unmappable	no match
697	1277641	1278808	1167	3CEN	perfectly mapped
698	1278910	1280077	1167	3CEN	perfectly mapped
699	1280179	1281345	1166	unmappable	no match
700	1281447	1282613	1166	3CEN	perfectly mapped
701	1282715	1283881	1166	unmappable	no match
702	1283983	1285149	1166	3R	perfectly mapped
703	1285251	1286416	1165	unmappable	no match
704	1286518	1287683	1165	3R	mapped
705	1287785	1288950	1165	3R	perfectly mapped
706	1289052	1290217	1165	unmappable	no match
707	1290319	1291483	1164	unmappable	no match
708	1291585	1292749	1164	unmappable	no match
709	1292851	1294015	1164	unmappable	no match
710	1294117	1295280	1163	X3	perfectly mapped
711	1295382	1296545	1163	unmappable	no match
712	1296647	1297810	1163	3L	perfectly mapped
713	1297912	1299075	1163	unmappable	no match
714	1299177	1300340	1163	3CEN	perfectly mapped
715	1300442	1301604	1162	unmappable	no match
716	1301706	1302868	1162	3CEN	perfectly mapped
717	1302970	1304132	1162	unmappable	no match
718	1304234	1305395	1161	unmappable	no match
719	1305497	1306658	1161	X3/X4	perfectly mapped
720	1306760	1307921	1161	unmappable	no match
721	1308023	1309184	1161	3L	perfectly mapped
722	1309286	1310446	1160	3L	perfectly mapped
723	1310548	1311708	1160	XY	perfectly mapped
724	1311810	1312970	1160	X1	perfectly mapped
725	1313072	1314232	1160	unmappable	no match
726	1314334	1315493	1159	Y	perfectly mapped
727	1315595	1316754	1159	3R	perfectly mapped
728	1316856	1318015	1159	3R	perfectly mapped
729	1318117	1319276	1159	X2	perfectly mapped
730	1319378	1320536	1158	2R	perfectly mapped
731	1320638	1321796	1158	X4	perfectly mapped
732	1321898	1323056	1158	2R2	perfectly mapped
733	1323158	1324316	1158	unmappable	no match
734	1324418	1325576	1158	3R	perfectly mapped
735	1325678	1326836	1158	X4	perfectly mapped
736	1326938	1328096	1158	unmappable	no match
737	1328198	1329355	1157	unmappable	no match
738	1329457	1330614	1157	X4	perfectly mapped
739	1330716	1331873	1157	unmappable	no match
740	1331975	1333132	1157	unmappable	no match
741	1333234	1334390	1156	unmappable	no match
742	1334492	1335648	1156	unmappable	disagree
743	1335750	1336906	1156	3CEN	perfectly mapped
744	1337008	1338164	1156	unmappable	no match
745	1338266	1339421	1155	3CEN	perfectly mapped
746	1339523	1340678	1155	3R	perfectly mapped
747	1340780	1341935	1155	unmappable	no match
748	1342037	1343192	1155	X	perfectly mapped
749	1343294	1344449	1155	unmappable	no match
750	1344551	1345706	1155	unmappable	no match
751	1345808	1346963	1155	unmappable	no match
752	1347065	1348220	1155	Y	perfectly mapped
753	1348322	1349477	1155	unmappable	no match
754	1349579	1350734	1155	unmappable	no match
755	1350836	1351990	1154	3CEN	perfectly mapped
756	1352092	1353246	1154	unmappable	no match
757	1353348	1354502	1154	unmappable	no match
758	1354604	1355758	1154	unmappable	no match
759	1355860	1357014	1154	X3	perfectly mapped
760	1357116	1358270	1154	X4	perfectly mapped
761	1358372	1359525	1153	unmappable	no match
762	1359627	1360780	1153	X3	perfectly mapped
763	1360882	1362035	1153	unmappable	no match
764	1362137	1363290	1153	unmappable	no match
765	1363392	1364545	1153	unmappable	disagree
766	1364647	1365800	1153	unmappable	no match
767	1365902	1367055	1153	X3/X4	perfectly mapped
768	1367157	1368310	1153	unmappable	no match
769	1368412	1369564	1152	3CEN	perfectly mapped
770	1369666	1370818	1152	unmappable	no match
771	1370920	1372072	1152	Y	perfectly mapped
772	1372174	1373326	1152	Y	perfectly mapped
773	1373428	1374580	1152	unmappable	no match
774	1374682	1375833	1151	Y	perfectly mapped
775	1375935	1377086	1151	unmappable	no match
776	1377188	1378339	1151	Y	perfectly mapped
777	1378441	1379592	1151	unmappable	no match
778	1379694	1380844	1150	2R6	perfectly mapped
779	1380946	1382096	1150	unmappable	no match
780	1382198	1383348	1150	unmappable	no match
781	1383450	1384600	1150	X	perfectly mapped
782	1384702	1385852	1150	unmappable	no match
783	1385954	1387104	1150	unmappable	no match
784	1387206	1388355	1149	unmappable	no match
785	1388457	1389606	1149	unmappable	no match
786	1389708	1390857	1149	unmappable	no match
787	1390959	1392108	1149	X4	perfectly mapped
788	1392210	1393359	1149	unmappable	no match
789	1393461	1394609	1148	Y	perfectly mapped
790	1394711	1395859	1148	X3	perfectly mapped
791	1395961	1397109	1148	unmappable	no match
792	1397211	1398359	1148	3R	perfectly mapped
793	1398461	1399609	1148	unmappable	no match
794	1399711	1400859	1148	3CEN	perfectly mapped
795	1400961	1402108	1147	unmappable	no match
796	1402210	1403357	1147	X3/X4	perfectly mapped
797	1403459	1404606	1147	unmappable	no match
798	1404708	1405855	1147	unmappable	no match
799	1405957	1407104	1147	unmappable	no match
800	1407206	1408353	1147	unmappable	no match
801	1408455	1409601	1146	unmappable	no match
802	1409703	1410849	1146	unmappable	disagree
803	1410951	1412097	1146	unmappable	no match
804	1412199	1413344	1145	unmappable	no match
805	1413446	1414591	1145	unmappable	no match
806	1414693	1415838	1145	Y	perfectly mapped
807	1415940	1417085	1145	X4	perfectly mapped
808	1417187	1418332	1145	unmappable	no match
809	1418434	1419578	1144	unmappable	no match
810	1419680	1420824	1144	unmappable	disagree
811	1420926	1422070	1144	unmappable	no match
812	1422172	1423316	1144	unmappable	no match
813	1423418	1424562	1144	unmappable	no match
814	1424664	1425808	1144	unmappable	no match
815	1425910	1427054	1144	3CEN	perfectly mapped
816	1427156	1428300	1144	X4	perfectly mapped
817	1428402	1429546	1144	X	perfectly mapped
818	1429648	1430791	1143	XY	perfectly mapped
819	1430893	1432036	1143	X	perfectly mapped
820	1432138	1433281	1143	unmappable	no match
821	1433383	1434525	1142	3L	perfectly mapped
822	1434627	1435769	1142	unmappable	no match
823	1435871	1437013	1142	unmappable	no match
824	1437115	1438256	1141	3CEN	perfectly mapped
825	1438358	1439499	1141	unmappable	no match
826	1439601	1440741	1140	unmappable	no match
827	1440843	1441983	1140	X4	perfectly mapped
828	1442085	1443225	1140	2R	perfectly mapped
829	1443327	1444467	1140	2R	perfectly mapped
830	1444569	1445709	1140	Y	perfectly mapped
831	1445811	1446950	1139	unmappable	no match
832	1447052	1448191	1139	unmappable	no match
833	1448293	1449432	1139	unmappable	no match
834	1449534	1450673	1139	2R2	perfectly mapped
835	1450775	1451914	1139	unmappable	no match
836	1452016	1453155	1139	Y	perfectly mapped
837	1453257	1454396	1139	unmappable	no match
838	1454498	1455636	1138	X4	perfectly mapped
839	1455738	1456876	1138	unmappable	no match
840	1456978	1458116	1138	3CEN	perfectly mapped
841	1458218	1459356	1138	unmappable	disagree
842	1459458	1460595	1137	3CEN	perfectly mapped
843	1460697	1461834	1137	3CEN	perfectly mapped
844	1461936	1463073	1137	unmappable	no match
845	1463175	1464312	1137	X3	perfectly mapped
846	1464414	1465551	1137	X4	perfectly mapped
847	1465653	1466790	1137	unmappable	no match
848	1466892	1468029	1137	unmappable	no match
849	1468131	1469268	1137	X3/X4	perfectly mapped
850	1469370	1470507	1137	X1	perfectly mapped
851	1470609	1471745	1136	unmappable	no match
852	1471847	1472983	1136	unmappable	no match
853	1473085	1474221	1136	X1	perfectly mapped
854	1474323	1475459	1136	unmappable	no match
855	1475561	1476697	1136	unmappable	no match
856	1476799	1477934	1135	unmappable	no match
857	1478036	1479171	1135	unmappable	no match
858	1479273	1480407	1134	unmappable	no match
859	1480509	1481643	1134	X2	perfectly mapped
860	1481745	1482878	1133	X4	perfectly mapped
861	1482980	1484113	1133	3R	perfectly mapped
862	1484215	1485348	1133	unmappable	no match
863	1485450	1486582	1132	XY	perfectly mapped
864	1486684	1487816	1132	unmappable	no match
865	1487918	1489050	1132	2R	perfectly mapped
866	1489152	1490284	1132	unmappable	no match
867	1490386	1491518	1132	unmappable	no match
868	1491620	1492752	1132	3R	perfectly mapped
869	1492854	1493986	1132	unmappable	disagree
870	1494088	1495220	1132	unmappable	no match
871	1495322	1496453	1131	unmappable	no match
872	1496555	1497686	1131	Y	perfectly mapped
873	1497788	1498919	1131	unmappable	no match
874	1499021	1500152	1131	3CEN	perfectly mapped
875	1500254	1501384	1130	unmappable	no match
876	1501486	1502616	1130	unmappable	no match
877	1502718	1503848	1130	X	perfectly mapped
878	1503950	1505080	1130	3CEN	perfectly mapped
879	1505182	1506312	1130	X3/X4	perfectly mapped
880	1506414	1507544	1130	Y	perfectly mapped
881	1507646	1508776	1130	X1	perfectly mapped
882	1508878	1510007	1129	unmappable	no match
883	1510109	1511238	1129	unmappable	no match
884	1511340	1512469	1129	3CEN	perfectly mapped
885	1512571	1513700	1129	unmappable	no match
886	1513802	1514930	1128	unmappable	no match
887	1515032	1516160	1128	Y	perfectly mapped
888	1516262	1517390	1128	unmappable	no match
889	1517492	1518620	1128	unmappable	disagree
890	1518722	1519850	1128	unmappable	no match
891	1519952	1521079	1127	3R	perfectly mapped
892	1521181	1522308	1127	unmappable	no match
893	1522410	1523537	1127	unmappable	no match
894	1523639	1524766	1127	3CEN	perfectly mapped
895	1524868	1525995	1127	XY	perfectly mapped
896	1526097	1527224	1127	X4	perfectly mapped
897	1527326	1528453	1127	X3	perfectly mapped
898	1528555	1529681	1126	unmappable	no match
899	1529783	1530909	1126	X3	perfectly mapped
900	1531011	1532137	1126	3R	perfectly mapped
901	1532239	1533364	1125	unmappable	no match
902	1533466	1534591	1125	unmappable	no match
903	1534693	1535818	1125	2R5	perfectly mapped
904	1535920	1537045	1125	2R	perfectly mapped
905	1537147	1538272	1125	unmappable	no match
906	1538374	1539498	1124	unmappable	no match
907	1539600	1540724	1124	unmappable	no match
908	1540826	1541950	1124	3CEN	perfectly mapped
909	1542052	1543175	1123	unmappable	no match
910	1543277	1544400	1123	unmappable	no match
911	1544502	1545625	1123	X3/X4	perfectly mapped
912	1545727	1546850	1123	unmappable	no match
913	1546952	1548075	1123	unmappable	no match
914	1548177	1549299	1122	unmappable	no match
915	1549401	1550523	1122	unmappable	no match
916	1550625	1551747	1122	unmappable	no match
917	1551849	1552971	1122	unmappable	no match
918	1553073	1554195	1122	2R6	perfectly mapped
919	1554297	1555419	1122	unmappable	no match
920	1555521	1556643	1122	2R5	perfectly mapped
921	1556745	1557867	1122	3CEN	perfectly mapped
922	1557969	1559091	1122	X2	perfectly mapped
923	1559193	1560314	1121	2R	perfectly mapped
924	1560416	1561537	1121	unmappable	no match
925	1561639	1562760	1121	X3	perfectly mapped
926	1562862	1563983	1121	3R	perfectly mapped
927	1564085	1565205	1120	unmappable	no match
928	1565307	1566427	1120	unmappable	no match
929	1566529	1567649	1120	unmappable	no match
930	1567751	1568871	1120	3CEN	perfectly mapped
931	1568973	1570093	1120	3R	mapped
932	1570195	1571315	1120	X3/X4	perfectly mapped
933	1571417	1572536	1119	unmappable	no match
934	1572638	1573757	1119	X4	perfectly mapped
935	1573859	1574978	1119	unmappable	no match
936	1575080	1576198	1118	XY	mapped
937	1576300	1577418	1118	3CEN	perfectly mapped
938	1577520	1578638	1118	unmappable	disagree
939	1578740	1579857	1117	unmappable	no match
940	1579959	1581076	1117	unmappable	no match
941	1581178	1582295	1117	unmappable	no match
942	1582397	1583514	1117	unmappable	no match
943	1583616	1584733	1117	unmappable	no match
944	1584835	1585952	1117	unmappable	no match
945	1586054	1587170	1116	Y	perfectly mapped
946	1587272	1588388	1116	unmappable	no match
947	1588490	1589606	1116	3L	perfectly mapped
948	1589708	1590824	1116	unmappable	no match
949	1590926	1592042	1116	3CEN	perfectly mapped
950	1592144	1593260	1116	unmappable	no match
951	1593362	1594477	1115	X4	perfectly mapped
952	1594579	1595694	1115	unmappable	no match
953	1595796	1596911	1115	unmappable	no match
954	1597013	1598128	1115	unmappable	no match
955	1598230	1599345	1115	2R	perfectly mapped
956	1599447	1600561	1114	X3/X4	perfectly mapped
957	1600663	1601777	1114	unmappable	disagree
958	1601879	1602993	1114	X2	perfectly mapped
959	1603095	1604209	1114	3CEN	perfectly mapped
960	1604311	1605425	1114	unmappable	no match
961	1605527	1606640	1113	unmappable	no match
962	1606742	1607855	1113	X2	perfectly mapped
963	1607957	1609070	1113	3L	perfectly mapped
964	1609172	1610285	1113	X4	perfectly mapped
965	1610387	1611500	1113	unmappable	no match
966	1611602	1612715	1113	unmappable	no match
967	1612817	1613929	1112	3CEN	perfectly mapped
968	1614031	1615143	1112	3CEN	perfectly mapped
969	1615245	1616357	1112	XY	perfectly mapped
970	1616459	1617571	1112	unmappable	no match
971	1617673	1618784	1111	unmappable	no match
972	1618886	1619997	1111	2R5	perfectly mapped
973	1620099	1621210	1111	unmappable	no match
974	1621312	1622423	1111	unmappable	no match
975	1622525	1623636	1111	unmappable	no match
976	1623738	1624849	1111	unmappable	no match
977	1624951	1626062	1111	unmappable	no match
978	1626164	1627274	1110	Y	perfectly mapped
979	1627376	1628486	1110	unmappable	no match
980	1628588	1629698	1110	unmappable	no match
981	1629800	1630910	1110	unmappable	no match
982	1631012	1632122	1110	2R	perfectly mapped
983	1632224	1633334	1110	unmappable	no match
984	1633436	1634546	1110	unmappable	no match
985	1634648	1635757	1109	X1	perfectly mapped
986	1635859	1636968	1109	unmappable	no match
987	1637070	1638179	1109	unmappable	no match
988	1638281	1639390	1109	unmappable	no match
989	1639492	1640601	1109	Y	perfectly mapped
990	1640703	1641812	1109	unmappable	no match
991	1641914	1643022	1108	X4	perfectly mapped
992	1643124	1644232	1108	X2	perfectly mapped
993	1644334	1645442	1108	unmappable	no match
994	1645544	1646652	1108	unmappable	no match
995	1646754	1647862	1108	3CEN	perfectly mapped
996	1647964	1649072	1108	unmappable	no match
997	1649174	1650282	1108	3CEN	perfectly mapped
998	1650384	1651492	1108	3CEN	perfectly mapped
999	1651594	1652702	1108	unmappable	no match
1000	1652804	1653911	1107	unmappable	no match
1001	1654013	1655120	1107	X4	perfectly mapped
1002	1655222	1656329	1107	X4	perfectly mapped
1003	1656431	1657538	1107	X4	perfectly mapped
1004	1657640	1658746	1106	unmappable	no match
1005	1658848	1659954	1106	3R	perfectly mapped
1006	1660056	1661162	1106	unmappable	no match
1007	1661264	1662370	1106	unmappable	no match
1008	1662472	1663577	1105	3R	perfectly mapped
1009	1663679	1664784	1105	3L	perfectly mapped
1010	1664886	1665991	1105	unmappable	no match
1011	1666093	1667197	1104	3L	perfectly mapped
1012	1667299	1668403	1104	3R	perfectly mapped
1013	1668505	1669609	1104	3R	perfectly mapped
1014	1669711	1670814	1103	unmappable	no match
1015	1670916	1672019	1103	X3/X4	perfectly mapped
1016	1672121	1673224	1103	unmappable	no match
1017	1673326	1674429	1103	unmappable	no match
1018	1674531	1675634	1103	unmappable	no match
1019	1675736	1676838	1102	XY	perfectly mapped
1020	1676940	1678042	1102	unmappable	no match
1021	1678144	1679246	1102	3CEN	perfectly mapped
1022	1679348	1680450	1102	3R	perfectly mapped
1023	1680552	1681653	1101	unmappable	no match
1024	1681755	1682855	1100	unmappable	no match
1025	1682957	1684057	1100	3R	perfectly mapped
1026	1684159	1685259	1100	unmappable	no match
1027	1685361	1686461	1100	unmappable	no match
1028	1686563	1687663	1100	X3/X4	perfectly mapped
1029	1687765	1688865	1100	X2	perfectly mapped
1030	1688967	1690066	1099	3CEN	perfectly mapped
1031	1690168	1691267	1099	unmappable	no match
1032	1691369	1692468	1099	X3	perfectly mapped
1033	1692570	1693669	1099	unmappable	no match
1034	1693771	1694870	1099	3CEN	perfectly mapped
1035	1694972	1696070	1098	unmappable	no match
1036	1696172	1697270	1098	3CEN	perfectly mapped
1037	1697372	1698470	1098	Y	perfectly mapped
1038	1698572	1699670	1098	3R	perfectly mapped
1039	1699772	1700870	1098	unmappable	no match
1040	1700972	1702070	1098	3CEN	perfectly mapped
1041	1702172	1703270	1098	unmappable	no match
1042	1703372	1704469	1097	3CEN	perfectly mapped
1043	1704571	1705668	1097	unmappable	no match
1044	1705770	1706867	1097	unmappable	no match
1045	1706969	1708065	1096	unmappable	no match
1046	1708167	1709263	1096	3CEN	perfectly mapped
1047	1709365	1710461	1096	2R	perfectly mapped
1048	1710563	1711659	1096	X2	perfectly mapped
1049	1711761	1712857	1096	3R	perfectly mapped
1050	1712959	1714055	1096	3R	perfectly mapped
1051	1714157	1715253	1096	Y	perfectly mapped
1052	1715355	1716451	1096	X2	perfectly mapped
1053	1716553	1717649	1096	unmappable	no match
1054	1717751	1718847	1096	3R	perfectly mapped
1055	1718949	1720044	1095	unmappable	no match
1056	1720146	1721241	1095	Y	perfectly mapped
1057	1721343	1722438	1095	unmappable	no match
1058	1722540	1723635	1095	unmappable	disagree
1059	1723737	1724832	1095	unmappable	disagree
1060	1724934	1726028	1094	Y	perfectly mapped
1061	1726130	1727224	1094	unmappable	no match
1062	1727326	1728420	1094	unmappable	no match
1063	1728522	1729615	1093	unmappable	no match
1064	1729717	1730810	1093	unmappable	no match
1065	1730912	1732005	1093	unmappable	no match
1066	1732107	1733200	1093	unmappable	no match
1067	1733302	1734395	1093	X3/X4	perfectly mapped
1068	1734497	1735590	1093	X	perfectly mapped
1069	1735692	1736784	1092	unmappable	no match
1070	1736886	1737978	1092	unmappable	disagree
1071	1738080	1739172	1092	X1	perfectly mapped
1072	1739274	1740366	1092	X3	perfectly mapped
1073	1740468	1741560	1092	unmappable	no match
1074	1741662	1742754	1092	X4	perfectly mapped
1075	1742856	1743948	1092	Y	perfectly mapped
1076	1744050	1745142	1092	unmappable	no match
1077	1745244	1746336	1092	unmappable	no match
1078	1746438	1747529	1091	3R	perfectly mapped
1079	1747631	1748722	1091	unmappable	no match
1080	1748824	1749915	1091	X3/X4	perfectly mapped
1081	1750017	1751108	1091	XY	perfectly mapped
1082	1751210	1752301	1091	Y	perfectly mapped
1083	1752403	1753494	1091	unmappable	no match
1084	1753596	1754687	1091	unmappable	no match
1085	1754789	1755880	1091	X4	perfectly mapped
1086	1755982	1757072	1090	unmappable	no match
1087	1757174	1758264	1090	Y	perfectly mapped
1088	1758366	1759456	1090	3CEN	perfectly mapped
1089	1759558	1760648	1090	Y	perfectly mapped
1090	1760750	1761840	1090	X3	perfectly mapped
1091	1761942	1763032	1090	Y	perfectly mapped
1092	1763134	1764223	1089	2R5	perfectly mapped
1093	1764325	1765414	1089	unmappable	no match
1094	1765516	1766605	1089	X1	perfectly mapped
1095	1766707	1767796	1089	X1	perfectly mapped
1096	1767898	1768987	1089	unmappable	no match
1097	1769089	1770178	1089	unmappable	no match
1098	1770280	1771369	1089	3CEN	mapped
1099	1771471	1772560	1089	XY	perfectly mapped
1100	1772662	1773750	1088	unmappable	no match
1101	1773852	1774940	1088	3CEN	perfectly mapped
1102	1775042	1776130	1088	unmappable	no match
1103	1776232	1777319	1087	unmappable	no match
1104	1777421	1778508	1087	unmappable	no match
1105	1778610	1779697	1087	unmappable	no match
1106	1779799	1780886	1087	unmappable	no match
1107	1780988	1782075	1087	3L	perfectly mapped
1108	1782177	1783264	1087	X4	perfectly mapped
1109	1783366	1784452	1086	unmappable	no match
1110	1784554	1785640	1086	unmappable	no match
1111	1785742	1786828	1086	unmappable	no match
1112	1786930	1788016	1086	unmappable	no match
1113	1788118	1789204	1086	unmappable	disagree
1114	1789306	1790391	1085	unmappable	no match
1115	1790493	1791578	1085	unmappable	no match
1116	1791680	1792765	1085	Y	perfectly mapped
1117	1792867	1793952	1085	2R	perfectly mapped
1118	1794054	1795139	1085	X4	perfectly mapped
1119	1795241	1796326	1085	unmappable	no match
1120	1796428	1797512	1084	3CEN	perfectly mapped
1121	1797614	1798698	1084	X3	perfectly mapped
1122	1798800	1799884	1084	unmappable	no match
1123	1799986	1801070	1084	XY	perfectly mapped
1124	1801172	1802256	1084	unmappable	no match
1125	1802358	1803441	1083	unmappable	no match
1126	1803543	1804626	1083	unmappable	no match
1127	1804728	1805811	1083	X1	perfectly mapped
1128	1805913	1806996	1083	unmappable	no match
1129	1807098	1808181	1083	3CEN	perfectly mapped
1130	1808283	1809366	1083	unmappable	no match
1131	1809468	1810551	1083	unmappable	disagree
1132	1810653	1811736	1083	unmappable	no match
1133	1811838	1812920	1082	unmappable	disagree
1134	1813022	1814104	1082	2CEN	perfectly mapped
1135	1814206	1815288	1082	3CEN	perfectly mapped
1136	1815390	1816472	1082	X4	perfectly mapped
1137	1816574	1817656	1082	unmappable	no match
1138	1817758	1818840	1082	XY	perfectly mapped
1139	1818942	1820024	1082	3CEN	perfectly mapped
1140	1820126	1821208	1082	Y	perfectly mapped
1141	1821310	1822392	1082	X3/X4	perfectly mapped
1142	1822494	1823575	1081	X3/X4	perfectly mapped
1143	1823677	1824758	1081	unmappable	no match
1144	1824860	1825941	1081	unmappable	no match
1145	1826043	1827124	1081	unmappable	no match
1146	1827226	1828307	1081	unmappable	no match
1147	1828409	1829490	1081	X4	perfectly mapped
1148	1829592	1830672	1080	Y	perfectly mapped
1149	1830774	1831853	1079	unmappable	no match
1150	1831955	1833034	1079	unmappable	disagree
1151	1833136	1834215	1079	unmappable	no match
1152	1834317	1835395	1078	unmappable	no match
1153	1835497	1836575	1078	unmappable	no match
1154	1836677	1837755	1078	X3/X4	perfectly mapped
1155	1837857	1838935	1078	unmappable	disagree
1156	1839037	1840115	1078	unmappable	no match
1157	1840217	1841295	1078	unmappable	no match
1158	1841397	1842475	1078	X1	perfectly mapped
1159	1842577	1843655	1078	unmappable	no match
1160	1843757	1844835	1078	unmappable	no match
1161	1844937	1846014	1077	unmappable	no match
1162	1846116	1847193	1077	3CEN	perfectly mapped
1163	1847295	1848372	1077	unmappable	no match
1164	1848474	1849551	1077	unmappable	no match
1165	1849653	1850730	1077	3CEN	perfectly mapped
1166	1850832	1851909	1077	Y	perfectly mapped
1167	1852011	1853088	1077	unmappable	no match
1168	1853190	1854267	1077	unmappable	no match
1169	1854369	1855446	1077	X4	perfectly mapped
1170	1855548	1856625	1077	3CEN	perfectly mapped
1171	1856727	1857804	1077	unmappable	no match
1172	1857906	1858983	1077	Y	perfectly mapped
1173	1859085	1860162	1077	3CEN	perfectly mapped
1174	1860264	1861341	1077	3CEN	perfectly mapped
1175	1861443	1862519	1076	Y	perfectly mapped
1176	1862621	1863697	1076	X3/X4	perfectly mapped
1177	1863799	1864875	1076	X3/X4	perfectly mapped
1178	1864977	1866053	1076	unmappable	no match
1179	1866155	1867231	1076	unmappable	no match
1180	1867333	1868409	1076	3R	perfectly mapped
1181	1868511	1869587	1076	unmappable	no match
1182	1869689	1870765	1076	2R	perfectly mapped
1183	1870867	1871943	1076	XY	perfectly mapped
1184	1872045	1873121	1076	3CEN	perfectly mapped
1185	1873223	1874298	1075	XY	perfectly mapped
1186	1874400	1875475	1075	3CEN	perfectly mapped
1187	1875577	1876652	1075	unmappable	no match
1188	1876754	1877829	1075	unmappable	no match
1189	1877931	1879005	1074	unmappable	no match
1190	1879107	1880181	1074	unmappable	no match
1191	1880283	1881357	1074	unmappable	no match
1192	1881459	1882533	1074	unmappable	no match
1193	1882635	1883709	1074	unmappable	no match
1194	1883811	1884885	1074	X3/X4	perfectly mapped
1195	1884987	1886061	1074	unmappable	no match
1196	1886163	1887237	1074	unmappable	no match
1197	1887339	1888413	1074	Y	perfectly mapped
1198	1888515	1889589	1074	2R6	perfectly mapped
1199	1889691	1890765	1074	unmappable	no match
1200	1890867	1891941	1074	unmappable	no match
1201	1892043	1893116	1073	unmappable	no match
1202	1893218	1894291	1073	unmappable	no match
1203	1894393	1895466	1073	3CEN	perfectly mapped
1204	1895568	1896641	1073	unmappable	disagree
1205	1896743	1897816	1073	2R	perfectly mapped
1206	1897918	1898991	1073	unmappable	no match
1207	1899093	1900166	1073	unmappable	disagree
1208	1900268	1901340	1072	unmappable	no match
1209	1901442	1902514	1072	3CEN	perfectly mapped
1210	1902616	1903688	1072	2L	perfectly mapped
1211	1903790	1904862	1072	2R2	perfectly mapped
1212	1904964	1906036	1072	unmappable	no match
1213	1906138	1907210	1072	Y	perfectly mapped
1214	1907312	1908383	1071	unmappable	no match
1215	1908485	1909556	1071	X4	perfectly mapped
1216	1909658	1910729	1071	2R	perfectly mapped
1217	1910831	1911902	1071	unmappable	no match
1218	1912004	1913075	1071	3L	perfectly mapped
1219	1913177	1914248	1071	3CEN	perfectly mapped
1220	1914350	1915421	1071	unmappable	no match
1221	1915523	1916594	1071	2R	perfectly mapped
1222	1916696	1917766	1070	X2	perfectly mapped
1223	1917868	1918938	1070	unmappable	no match
1224	1919040	1920110	1070	unmappable	no match
1225	1920212	1921282	1070	Y	perfectly mapped
1226	1921384	1922454	1070	3CEN	perfectly mapped
1227	1922556	1923626	1070	unmappable	no match
1228	1923728	1924798	1070	unmappable	disagree
1229	1924900	1925970	1070	unmappable	no match
1230	1926072	1927142	1070	unmappable	no match
1231	1927244	1928313	1069	3R	perfectly mapped
1232	1928415	1929484	1069	unmappable	no match
1233	1929586	1930655	1069	3CEN	perfectly mapped
1234	1930757	1931826	1069	X4	perfectly mapped
1235	1931928	1932997	1069	unmappable	no match
1236	1933099	1934168	1069	XY	perfectly mapped
1237	1934270	1935339	1069	unmappable	no match
1238	1935441	1936509	1068	unmappable	no match
1239	1936611	1937679	1068	X1	perfectly mapped
1240	1937781	1938849	1068	2CEN	perfectly mapped
1241	1938951	1940019	1068	unmappable	no match
1242	1940121	1941189	1068	unmappable	no match
1243	1941291	1942359	1068	Y	perfectly mapped
1244	1942461	1943529	1068	XY	perfectly mapped
1245	1943631	1944699	1068	unmappable	no match
1246	1944801	1945868	1067	Y	perfectly mapped
1247	1945970	1947037	1067	X3/X4	perfectly mapped
1248	1947139	1948206	1067	XY	perfectly mapped
1249	1948308	1949375	1067	unmappable	no match
1250	1949477	1950544	1067	XY	perfectly mapped
1251	1950646	1951712	1066	Y	perfectly mapped
1252	1951814	1952880	1066	unmappable	no match
1253	1952982	1954048	1066	unmappable	no match
1254	1954150	1955216	1066	unmappable	no match
1255	1955318	1956384	1066	X4	perfectly mapped
1256	1956486	1957552	1066	XY	mapped
1257	1957654	1958720	1066	3R	perfectly mapped
1258	1958822	1959888	1066	2R	perfectly mapped
1259	1959990	1961055	1065	X4	perfectly mapped
1260	1961157	1962222	1065	unmappable	no match
1261	1962324	1963389	1065	3CEN	perfectly mapped
1262	1963491	1964556	1065	2R	perfectly mapped
1263	1964658	1965723	1065	unmappable	no match
1264	1965825	1966890	1065	unmappable	no match
1265	1966992	1968056	1064	XY	mapped
1266	1968158	1969222	1064	unmappable	no match
1267	1969324	1970388	1064	unmappable	no match
1268	1970490	1971554	1064	unmappable	no match
1269	1971656	1972720	1064	3R	perfectly mapped
1270	1972822	1973886	1064	unmappable	disagree
1271	1973988	1975052	1064	X4	perfectly mapped
1272	1975154	1976218	1064	2R	perfectly mapped
1273	1976320	1977383	1063	XY	perfectly mapped
1274	1977485	1978548	1063	unmappable	disagree
1275	1978650	1979713	1063	X3/X4	perfectly mapped
1276	1979815	1980878	1063	unmappable	no match
1277	1980980	1982043	1063	unmappable	no match
1278	1982145	1983208	1063	unmappable	no match
1279	1983310	1984372	1062	unmappable	no match
1280	1984474	1985536	1062	unmappable	no match
1281	1985638	1986700	1062	unmappable	no match
1282	1986802	1987864	1062	Y	perfectly mapped
1283	1987966	1989028	1062	3CEN	perfectly mapped
1284	1989130	1990192	1062	unmappable	no match
1285	1990294	1991356	1062	unmappable	no match
1286	1991458	1992519	1061	X1	perfectly mapped
1287	1992621	1993682	1061	unmappable	no match
1288	1993784	1994845	1061	X1	perfectly mapped
1289	1994947	1996008	1061	unmappable	no match
1290	1996110	1997171	1061	2CEN	perfectly mapped
1291	1997273	1998333	1060	unmappable	no match
1292	1998435	1999495	1060	X2	perfectly mapped
1293	1999597	2000657	1060	unmappable	no match
1294	2000759	2001819	1060	unmappable	no match
1295	2001921	2002981	1060	3CEN	perfectly mapped
1296	2003083	2004143	1060	unmappable	no match
1297	2004245	2005305	1060	unmappable	no match
1298	2005407	2006467	1060	3CEN	perfectly mapped
1299	2006569	2007629	1060	unmappable	disagree
1300	2007731	2008790	1059	unmappable	no match
1301	2008892	2009951	1059	unmappable	no match
1302	2010053	2011112	1059	X3/X4	perfectly mapped
1303	2011214	2012273	1059	XY	perfectly mapped
1304	2012375	2013433	1058	3R	perfectly mapped
1305	2013535	2014593	1058	unmappable	no match
1306	2014695	2015753	1058	unmappable	no match
1307	2015855	2016912	1057	3CEN	perfectly mapped
1308	2017014	2018071	1057	unmappable	no match
1309	2018173	2019230	1057	Y	perfectly mapped
1310	2019332	2020389	1057	unmappable	no match
1311	2020491	2021548	1057	3CEN	perfectly mapped
1312	2021650	2022707	1057	Y	perfectly mapped
1313	2022809	2023865	1056	3CEN	perfectly mapped
1314	2023967	2025023	1056	3CEN	perfectly mapped
1315	2025125	2026181	1056	2R	perfectly mapped
1316	2026283	2027339	1056	X4	perfectly mapped
1317	2027441	2028497	1056	unmappable	no match
1318	2028599	2029655	1056	X1	perfectly mapped
1319	2029757	2030813	1056	Y	perfectly mapped
1320	2030915	2031971	1056	X1	perfectly mapped
1321	2032073	2033129	1056	unmappable	no match
1322	2033231	2034286	1055	unmappable	no match
1323	2034388	2035443	1055	unmappable	disagree
1324	2035545	2036600	1055	3CEN	perfectly mapped
1325	2036702	2037757	1055	unmappable	no match
1326	2037859	2038913	1054	X2	perfectly mapped
1327	2039015	2040069	1054	3CEN	perfectly mapped
1328	2040171	2041225	1054	X4	perfectly mapped
1329	2041327	2042381	1054	unmappable	no match
1330	2042483	2043537	1054	unmappable	no match
1331	2043639	2044693	1054	X2	perfectly mapped
1332	2044795	2045849	1054	unmappable	no match
1333	2045951	2047005	1054	unmappable	no match
1334	2047107	2048161	1054	unmappable	no match
1335	2048263	2049317	1054	X2	perfectly mapped
1336	2049419	2050472	1053	3R	perfectly mapped
1337	2050574	2051627	1053	unmappable	no match
1338	2051729	2052782	1053	unmappable	no match
1339	2052884	2053937	1053	X1	perfectly mapped
1340	2054039	2055092	1053	unmappable	no match
1341	2055194	2056247	1053	2R	perfectly mapped
1342	2056349	2057402	1053	X3	perfectly mapped
1343	2057504	2058557	1053	unmappable	no match
1344	2058659	2059712	1053	3CEN	perfectly mapped
1345	2059814	2060867	1053	unmappable	no match
1346	2060969	2062021	1052	unmappable	no match
1347	2062123	2063175	1052	unmappable	disagree
1348	2063277	2064329	1052	X4	perfectly mapped
1349	2064431	2065483	1052	3CEN	perfectly mapped
1350	2065585	2066637	1052	X1	perfectly mapped
1351	2066739	2067791	1052	2R	perfectly mapped
1352	2067893	2068945	1052	XY	perfectly mapped
1353	2069047	2070098	1051	unmappable	no match
1354	2070200	2071251	1051	unmappable	no match
1355	2071353	2072404	1051	unmappable	no match
1356	2072506	2073557	1051	unmappable	no match
1357	2073659	2074710	1051	Y	perfectly mapped
1358	2074812	2075863	1051	unmappable	no match
1359	2075965	2077016	1051	unmappable	no match
1360	2077118	2078168	1050	unmappable	no match
1361	2078270	2079320	1050	unmappable	no match
1362	2079422	2080472	1050	X4	perfectly mapped
1363	2080574	2081624	1050	unmappable	no match
1364	2081726	2082775	1049	unmappable	no match
1365	2082877	2083926	1049	3CEN	perfectly mapped
1366	2084028	2085077	1049	X1	perfectly mapped
1367	2085179	2086228	1049	X1	perfectly mapped
1368	2086330	2087379	1049	Y	perfectly mapped
1369	2087481	2088530	1049	XY	mapped
1370	2088632	2089680	1048	unmappable	no match
1371	2089782	2090830	1048	X1	perfectly mapped
1372	2090932	2091980	1048	unmappable	disagree
1373	2092082	2093130	1048	unmappable	no match
1374	2093232	2094280	1048	unmappable	no match
1375	2094382	2095430	1048	unmappable	no match
1376	2095532	2096580	1048	X	mapped
1377	2096682	2097729	1047	unmappable	no match
1378	2097831	2098878	1047	unmappable	no match
1379	2098980	2100027	1047	X4	perfectly mapped
1380	2100129	2101176	1047	unmappable	no match
1381	2101278	2102325	1047	unmappable	no match
1382	2102427	2103474	1047	unmappable	no match
1383	2103576	2104623	1047	XY	perfectly mapped
1384	2104725	2105772	1047	unmappable	no match
1385	2105874	2106921	1047	unmappable	no match
1386	2107023	2108069	1046	2R6	perfectly mapped
1387	2108171	2109217	1046	X1	perfectly mapped
1388	2109319	2110365	1046	unmappable	no match
1389	2110467	2111513	1046	Y	perfectly mapped
1390	2111615	2112661	1046	X3/X4	perfectly mapped
1391	2112763	2113809	1046	unmappable	no match
1392	2113911	2114957	1046	X4	perfectly mapped
1393	2115059	2116105	1046	X3/X4	perfectly mapped
1394	2116207	2117253	1046	unmappable	disagree
1395	2117355	2118400	1045	3R	perfectly mapped
1396	2118502	2119547	1045	X4	perfectly mapped
1397	2119649	2120694	1045	3R	perfectly mapped
1398	2120796	2121841	1045	X3	perfectly mapped
1399	2121943	2122988	1045	X1	perfectly mapped
1400	2123090	2124135	1045	unmappable	no match
1401	2124237	2125281	1044	X1	perfectly mapped
1402	2125383	2126427	1044	3CEN	perfectly mapped
1403	2126529	2127573	1044	unmappable	no match
1404	2127675	2128719	1044	unmappable	no match
1405	2128821	2129865	1044	X2	perfectly mapped
1406	2129967	2131011	1044	unmappable	no match
1407	2131113	2132157	1044	unmappable	no match
1408	2132259	2133302	1043	X4	perfectly mapped
1409	2133404	2134447	1043	3CEN	perfectly mapped
1410	2134549	2135592	1043	X1	perfectly mapped
1411	2135694	2136737	1043	unmappable	no match
1412	2136839	2137882	1043	X4	perfectly mapped
1413	2137984	2139027	1043	unmappable	no match
1414	2139129	2140172	1043	unmappable	no match
1415	2140274	2141317	1043	unmappable	no match
1416	2141419	2142461	1042	X2	perfectly mapped
1417	2142563	2143605	1042	unmappable	no match
1418	2143707	2144749	1042	X4	perfectly mapped
1419	2144851	2145893	1042	X4	perfectly mapped
1420	2145995	2147037	1042	3CEN	perfectly mapped
1421	2147139	2148181	1042	X1	perfectly mapped
1422	2148283	2149325	1042	unmappable	no match
1423	2149427	2150469	1042	X2	perfectly mapped
1424	2150571	2151613	1042	2R	perfectly mapped
1425	2151715	2152756	1041	unmappable	no match
1426	2152858	2153899	1041	Y	perfectly mapped
1427	2154001	2155042	1041	X3/X4	perfectly mapped
1428	2155144	2156185	1041	Y	perfectly mapped
1429	2156287	2157328	1041	3R	perfectly mapped
1430	2157430	2158471	1041	X3/X4	perfectly mapped
1431	2158573	2159614	1041	X3	perfectly mapped
1432	2159716	2160757	1041	X3	perfectly mapped
1433	2160859	2161900	1041	X2	perfectly mapped
1434	2162002	2163042	1040	unmappable	no match
1435	2163144	2164184	1040	3CEN	perfectly mapped
1436	2164286	2165326	1040	3CEN	perfectly mapped
1437	2165428	2166468	1040	X1	perfectly mapped
1438	2166570	2167610	1040	3L	perfectly mapped
1439	2167712	2168752	1040	unmappable	no match
1440	2168854	2169894	1040	unmappable	no match
1441	2169996	2171036	1040	unmappable	no match
1442	2171138	2172177	1039	Y	perfectly mapped
1443	2172279	2173318	1039	unmappable	no match
1444	2173420	2174459	1039	unmappable	no match
1445	2174561	2175600	1039	XY	perfectly mapped
1446	2175702	2176741	1039	unmappable	no match
1447	2176843	2177882	1039	X4	perfectly mapped
1448	2177984	2179023	1039	unmappable	no match
1449	2179125	2180164	1039	unmappable	no match
1450	2180266	2181305	1039	unmappable	no match
1451	2181407	2182446	1039	2R1	perfectly mapped
1452	2182548	2183586	1038	unmappable	no match
1453	2183688	2184726	1038	X1	perfectly mapped
1454	2184828	2185866	1038	X3/X4	perfectly mapped
1455	2185968	2187006	1038	unmappable	disagree
1456	2187108	2188146	1038	unmappable	no match
1457	2188248	2189286	1038	unmappable	no match
1458	2189388	2190426	1038	unmappable	no match
1459	2190528	2191566	1038	unmappable	no match
1460	2191668	2192705	1037	unmappable	no match
1461	2192807	2193844	1037	unmappable	no match
1462	2193946	2194983	1037	unmappable	no match
1463	2195085	2196122	1037	X4	perfectly mapped
1464	2196224	2197261	1037	unmappable	no match
1465	2197363	2198400	1037	unmappable	no match
1466	2198502	2199539	1037	3CEN	perfectly mapped
1467	2199641	2200678	1037	3CEN	perfectly mapped
1468	2200780	2201817	1037	3CEN	perfectly mapped
1469	2201919	2202956	1037	unmappable	no match
1470	2203058	2204095	1037	unmappable	no match
1471	2204197	2205233	1036	unmappable	no match
1472	2205335	2206371	1036	XY	perfectly mapped
1473	2206473	2207509	1036	unmappable	no match
1474	2207611	2208647	1036	X2	perfectly mapped
1475	2208749	2209785	1036	unmappable	no match
1476	2209887	2210923	1036	X3/X4	perfectly mapped
1477	2211025	2212061	1036	unmappable	disagree
1478	2212163	2213199	1036	unmappable	no match
1479	2213301	2214337	1036	unmappable	no match
1480	2214439	2215474	1035	3L	perfectly mapped
1481	2215576	2216611	1035	2R5	perfectly mapped
1482	2216713	2217748	1035	X3/X4	perfectly mapped
1483	2217850	2218885	1035	3CEN	perfectly mapped
1484	2218987	2220022	1035	unmappable	no match
1485	2220124	2221159	1035	3CEN	perfectly mapped
1486	2221261	2222296	1035	3CEN	perfectly mapped
1487	2222398	2223432	1034	unmappable	no match
1488	2223534	2224568	1034	Y	perfectly mapped
1489	2224670	2225704	1034	unmappable	no match
1490	2225806	2226840	1034	X2	perfectly mapped
1491	2226942	2227976	1034	3CEN	perfectly mapped
1492	2228078	2229112	1034	3CEN	perfectly mapped
1493	2229214	2230248	1034	unmappable	no match
1494	2230350	2231384	1034	X2	perfectly mapped
1495	2231486	2232520	1034	Y	perfectly mapped
1496	2232622	2233656	1034	unmappable	no match
1497	2233758	2234791	1033	2R5	perfectly mapped
1498	2234893	2235926	1033	unmappable	no match
1499	2236028	2237061	1033	X4	perfectly mapped
1500	2237163	2238196	1033	unmappable	no match
1501	2238298	2239331	1033	2R	perfectly mapped
1502	2239433	2240466	1033	3L	perfectly mapped
1503	2240568	2241601	1033	unmappable	no match
1504	2241703	2242736	1033	unmappable	no match
1505	2242838	2243870	1032	unmappable	no match
1506	2243972	2245004	1032	unmappable	no match
1507	2245106	2246138	1032	2R	perfectly mapped
1508	2246240	2247272	1032	Y	perfectly mapped
1509	2247374	2248406	1032	unmappable	disagree
1510	2248508	2249539	1031	unmappable	no match
1511	2249641	2250672	1031	X1	perfectly mapped
1512	2250774	2251805	1031	unmappable	no match
1513	2251907	2252938	1031	unmappable	no match
1514	2253040	2254071	1031	unmappable	no match
1515	2254173	2255204	1031	Y	perfectly mapped
1516	2255306	2256337	1031	unmappable	no match
1517	2256439	2257470	1031	X	perfectly mapped
1518	2257572	2258603	1031	unmappable	no match
1519	2258705	2259735	1030	unmappable	no match
1520	2259837	2260867	1030	unmappable	no match
1521	2260969	2261999	1030	X3/X4	perfectly mapped
1522	2262101	2263131	1030	X1	perfectly mapped
1523	2263233	2264263	1030	unmappable	no match
1524	2264365	2265395	1030	unmappable	no match
1525	2265497	2266526	1029	unmappable	no match
1526	2266628	2267657	1029	Y	perfectly mapped
1527	2267759	2268788	1029	unmappable	no match
1528	2268890	2269919	1029	2R	perfectly mapped
1529	2270021	2271050	1029	unmappable	no match
1530	2271152	2272181	1029	unmappable	no match
1531	2272283	2273312	1029	unmappable	no match
1532	2273414	2274443	1029	unmappable	no match
1533	2274545	2275574	1029	unmappable	no match
1534	2275676	2276705	1029	unmappable	no match
1535	2276807	2277835	1028	Y	perfectly mapped
1536	2277937	2278965	1028	Y	perfectly mapped
1537	2279067	2280095	1028	unmappable	no match
1538	2280197	2281225	1028	2R2	perfectly mapped
1539	2281327	2282355	1028	2R	perfectly mapped
1540	2282457	2283485	1028	unmappable	disagree
1541	2283587	2284615	1028	unmappable	no match
1542	2284717	2285745	1028	unmappable	no match
1543	2285847	2286875	1028	unmappable	no match
1544	2286977	2288005	1028	X2	perfectly mapped
1545	2288107	2289135	1028	unmappable	disagree
1546	2289237	2290265	1028	unmappable	no match
1547	2290367	2291395	1028	X1	perfectly mapped
1548	2291497	2292525	1028	3CEN	perfectly mapped
1549	2292627	2293654	1027	3CEN	perfectly mapped
1550	2293756	2294783	1027	unmappable	no match
1551	2294885	2295912	1027	unmappable	no match
1552	2296014	2297041	1027	X3/X4	perfectly mapped
1553	2297143	2298170	1027	X4	perfectly mapped
1554	2298272	2299299	1027	unmappable	no match
1555	2299401	2300428	1027	unmappable	no match
1556	2300530	2301557	1027	unmappable	no match
1557	2301659	2302685	1026	unmappable	no match
1558	2302787	2303813	1026	X1	perfectly mapped
1559	2303915	2304941	1026	3CEN	perfectly mapped
1560	2305043	2306069	1026	unmappable	no match
1561	2306171	2307197	1026	unmappable	no match
1562	2307299	2308325	1026	3L	perfectly mapped
1563	2308427	2309453	1026	unmappable	no match
1564	2309555	2310581	1026	X1	perfectly mapped
1565	2310683	2311709	1026	unmappable	no match
1566	2311811	2312837	1026	unmappable	no match
1567	2312939	2313964	1025	2R	perfectly mapped
1568	2314066	2315091	1025	XY	perfectly mapped
1569	2315193	2316218	1025	unmappable	no match
1570	2316320	2317345	1025	Y	perfectly mapped
1571	2317447	2318472	1025	X1	perfectly mapped
1572	2318574	2319599	1025	unmappable	no match
1573	2319701	2320726	1025	unmappable	no match
1574	2320828	2321853	1025	unmappable	no match
1575	2321955	2322979	1024	X3/X4	perfectly mapped
1576	2323081	2324105	1024	unmappable	no match
1577	2324207	2325231	1024	unmappable	no match
1578	2325333	2326357	1024	X3/X4	perfectly mapped
1579	2326459	2327483	1024	2R	perfectly mapped
1580	2327585	2328609	1024	unmappable	no match
1581	2328711	2329734	1023	X1	perfectly mapped
1582	2329836	2330859	1023	3CEN	perfectly mapped
1583	2330961	2331984	1023	unmappable	no match
1584	2332086	2333109	1023	3CEN	perfectly mapped
1585	2333211	2334234	1023	unmappable	no match
1586	2334336	2335359	1023	Y	perfectly mapped
1587	2335461	2336483	1022	Y	perfectly mapped
1588	2336585	2337607	1022	unmappable	no match
1589	2337709	2338731	1022	Y	perfectly mapped
1590	2338833	2339855	1022	X1	perfectly mapped
1591	2339957	2340979	1022	unmappable	no match
1592	2341081	2342103	1022	unmappable	no match
1593	2342205	2343227	1022	XY	perfectly mapped
1594	2343329	2344351	1022	unmappable	no match
1595	2344453	2345475	1022	X1	perfectly mapped
1596	2345577	2346599	1022	unmappable	disagree
1597	2346701	2347723	1022	unmappable	no match
1598	2347825	2348847	1022	2R5	perfectly mapped
1599	2348949	2349971	1022	unmappable	no match
1600	2350073	2351094	1021	XY	perfectly mapped
1601	2351196	2352217	1021	X1	perfectly mapped
1602	2352319	2353340	1021	unmappable	no match
1603	2353442	2354463	1021	3CEN	perfectly mapped
1604	2354565	2355586	1021	unmappable	no match
1605	2355688	2356709	1021	unmappable	no match
1606	2356811	2357832	1021	Y	perfectly mapped
1607	2357934	2358954	1020	Y	perfectly mapped
1608	2359056	2360076	1020	X2	perfectly mapped
1609	2360178	2361198	1020	X3/X4	perfectly mapped
1610	2361300	2362320	1020	unmappable	no match
1611	2362422	2363442	1020	X1	perfectly mapped
1612	2363544	2364564	1020	unmappable	no match
1613	2364666	2365686	1020	3CEN	perfectly mapped
1614	2365788	2366808	1020	X1	perfectly mapped
1615	2366910	2367930	1020	unmappable	no match
1616	2368032	2369052	1020	unmappable	no match
1617	2369154	2370173	1019	2CEN	perfectly mapped
1618	2370275	2371294	1019	unmappable	no match
1619	2371396	2372415	1019	unmappable	no match
1620	2372517	2373536	1019	X3/X4	perfectly mapped
1621	2373638	2374657	1019	X4	perfectly mapped
1622	2374759	2375778	1019	unmappable	no match
1623	2375880	2376899	1019	X1	perfectly mapped
1624	2377001	2378020	1019	unmappable	no match
1625	2378122	2379141	1019	unmappable	no match
1626	2379243	2380261	1018	unmappable	no match
1627	2380363	2381381	1018	3CEN	perfectly mapped
1628	2381483	2382501	1018	unmappable	no match
1629	2382603	2383621	1018	unmappable	no match
1630	2383723	2384741	1018	unmappable	no match
1631	2384843	2385861	1018	unmappable	no match
1632	2385963	2386980	1017	unmappable	no match
1633	2387082	2388099	1017	unmappable	no match
1634	2388201	2389218	1017	unmappable	no match
1635	2389320	2390337	1017	unmappable	no match
1636	2390439	2391456	1017	unmappable	no match
1637	2391558	2392575	1017	unmappable	no match
1638	2392677	2393694	1017	unmappable	no match
1639	2393796	2394813	1017	X1	perfectly mapped
1640	2394915	2395932	1017	unmappable	no match
1641	2396034	2397051	1017	3CEN	perfectly mapped
1642	2397153	2398169	1016	X	mapped
1643	2398271	2399287	1016	unmappable	no match
1644	2399389	2400405	1016	X4	perfectly mapped
1645	2400507	2401523	1016	3L	perfectly mapped
1646	2401625	2402641	1016	3CEN	perfectly mapped
1647	2402743	2403759	1016	unmappable	no match
1648	2403861	2404877	1016	X1	perfectly mapped
1649	2404979	2405994	1015	unmappable	no match
1650	2406096	2407111	1015	XY	perfectly mapped
1651	2407213	2408228	1015	Y	perfectly mapped
1652	2408330	2409345	1015	unmappable	no match
1653	2409447	2410462	1015	unmappable	no match
1654	2410564	2411579	1015	unmappable	no match
1655	2411681	2412696	1015	unmappable	no match
1656	2412798	2413813	1015	unmappable	no match
1657	2413915	2414930	1015	unmappable	no match
1658	2415032	2416047	1015	X1	perfectly mapped
1659	2416149	2417163	1014	unmappable	no match
1660	2417265	2418279	1014	unmappable	no match
1661	2418381	2419395	1014	unmappable	no match
1662	2419497	2420511	1014	unmappable	no match
1663	2420613	2421627	1014	unmappable	disagree
1664	2421729	2422743	1014	3CEN	perfectly mapped
1665	2422845	2423859	1014	XY	perfectly mapped
1666	2423961	2424975	1014	3L	perfectly mapped
1667	2425077	2426091	1014	unmappable	no match
1668	2426193	2427207	1014	unmappable	no match
1669	2427309	2428323	1014	unmappable	no match
1670	2428425	2429439	1014	unmappable	no match
1671	2429541	2430554	1013	3CEN	perfectly mapped
1672	2430656	2431669	1013	unmappable	no match
1673	2431771	2432784	1013	2R1	perfectly mapped
1674	2432886	2433899	1013	unmappable	no match
1675	2434001	2435014	1013	unmappable	no match
1676	2435116	2436129	1013	unmappable	no match
1677	2436231	2437244	1013	X2	perfectly mapped
1678	2437346	2438359	1013	unmappable	no match
1679	2438461	2439473	1012	unmappable	no match
1680	2439575	2440587	1012	Y	perfectly mapped
1681	2440689	2441701	1012	unmappable	no match
1682	2441803	2442815	1012	unmappable	no match
1683	2442917	2443929	1012	Y	perfectly mapped
1684	2444031	2445043	1012	unmappable	no match
1685	2445145	2446157	1012	unmappable	disagree
1686	2446259	2447271	1012	unmappable	no match
1687	2447373	2448384	1011	unmappable	no match
1688	2448486	2449497	1011	3CEN	perfectly mapped
1689	2449599	2450610	1011	X1	perfectly mapped
1690	2450712	2451723	1011	Y	perfectly mapped
1691	2451825	2452836	1011	unmappable	no match
1692	2452938	2453949	1011	unmappable	no match
1693	2454051	2455062	1011	unmappable	no match
1694	2455164	2456175	1011	Y	perfectly mapped
1695	2456277	2457288	1011	X4	perfectly mapped
1696	2457390	2458401	1011	Y	perfectly mapped
1697	2458503	2459514	1011	unmappable	no match
1698	2459616	2460627	1011	unmappable	no match
1699	2460729	2461740	1011	unmappable	no match
1700	2461842	2462853	1011	unmappable	no match
1701	2462955	2463966	1011	3CEN	perfectly mapped
1702	2464068	2465078	1010	3CEN	perfectly mapped
1703	2465180	2466190	1010	unmappable	no match
1704	2466292	2467302	1010	X1	perfectly mapped
1705	2467404	2468414	1010	unmappable	no match
1706	2468516	2469526	1010	unmappable	no match
1707	2469628	2470638	1010	X1	perfectly mapped
1708	2470740	2471750	1010	2R	perfectly mapped
1709	2471852	2472862	1010	unmappable	no match
1710	2472964	2473973	1009	X3	perfectly mapped
1711	2474075	2475084	1009	X1	perfectly mapped
1712	2475186	2476195	1009	unmappable	no match
1713	2476297	2477305	1008	X1	perfectly mapped
1714	2477407	2478415	1008	Y	perfectly mapped
1715	2478517	2479525	1008	unmappable	no match
1716	2479627	2480635	1008	3CEN	perfectly mapped
1717	2480737	2481745	1008	3CEN	mapped
1718	2481847	2482855	1008	unmappable	no match
1719	2482957	2483964	1007	Y	perfectly mapped
1720	2484066	2485073	1007	unmappable	no match
1721	2485175	2486182	1007	unmappable	disagree
1722	2486284	2487291	1007	unmappable	no match
1723	2487393	2488400	1007	3CEN	perfectly mapped
1724	2488502	2489509	1007	unmappable	no match
1725	2489611	2490618	1007	unmappable	no match
1726	2490720	2491727	1007	X2	perfectly mapped
1727	2491829	2492835	1006	3CEN	perfectly mapped
1728	2492937	2493943	1006	unmappable	disagree
1729	2494045	2495051	1006	unmappable	no match
1730	2495153	2496159	1006	unmappable	no match
1731	2496261	2497267	1006	3CEN	perfectly mapped
1732	2497369	2498375	1006	unmappable	no match
1733	2498477	2499483	1006	unmappable	no match
1734	2499585	2500591	1006	X3/X4	perfectly mapped
1735	2500693	2501699	1006	X3/X4	perfectly mapped
1736	2501801	2502807	1006	unmappable	no match
1737	2502909	2503914	1005	unmappable	no match
1738	2504016	2505021	1005	unmappable	no match
1739	2505123	2506128	1005	unmappable	no match
1740	2506230	2507235	1005	unmappable	no match
1741	2507337	2508342	1005	unmappable	no match
1742	2508444	2509449	1005	unmappable	no match
1743	2509551	2510555	1004	unmappable	no match
1744	2510657	2511661	1004	X4	perfectly mapped
1745	2511763	2512767	1004	Y	perfectly mapped
1746	2512869	2513873	1004	unmappable	no match
1747	2513975	2514979	1004	Y	perfectly mapped
1748	2515081	2516085	1004	Y	perfectly mapped
1749	2516187	2517191	1004	unmappable	no match
1750	2517293	2518297	1004	unmappable	no match
1751	2518399	2519403	1004	unmappable	no match
1752	2519505	2520509	1004	unmappable	no match
1753	2520611	2521615	1004	unmappable	no match
1754	2521717	2522721	1004	unmappable	no match
1755	2522823	2523827	1004	unmappable	no match
1756	2523929	2524933	1004	unmappable	no match
1757	2525035	2526039	1004	unmappable	no match
1758	2526141	2527144	1003	X1	perfectly mapped
1759	2527246	2528249	1003	3CEN	perfectly mapped
1760	2528351	2529354	1003	X1	perfectly mapped
1761	2529456	2530459	1003	unmappable	no match
1762	2530561	2531564	1003	3CEN	perfectly mapped
1763	2531666	2532669	1003	unmappable	no match
1764	2532771	2533774	1003	X3	perfectly mapped
1765	2533876	2534879	1003	Y	perfectly mapped
1766	2534981	2535984	1003	X1	perfectly mapped
1767	2536086	2537088	1002	X1	perfectly mapped
1768	2537190	2538192	1002	unmappable	no match
1769	2538294	2539296	1002	X3/X4	perfectly mapped
1770	2539398	2540400	1002	XY	mapped
1771	2540502	2541504	1002	Y	perfectly mapped
1772	2541606	2542608	1002	X	mapped
1773	2542710	2543712	1002	3CEN	perfectly mapped
1774	2543814	2544815	1001	unmappable	no match
1775	2544917	2545918	1001	X4	perfectly mapped
1776	2546020	2547021	1001	unmappable	no match
1777	2547123	2548124	1001	Y	perfectly mapped
1778	2548226	2549227	1001	unmappable	no match
1779	2549329	2550330	1001	3CEN	perfectly mapped
1780	2550432	2551433	1001	unmappable	no match
1781	2551535	2552536	1001	unmappable	no match
1782	2552638	2553639	1001	unmappable	no match
1783	2553741	2554742	1001	unmappable	no match
1784	2554844	2555845	1001	X3/X4	perfectly mapped
1785	2555947	2556948	1001	unmappable	no match
1786	2557050	2558050	1000	unmappable	no match
1787	2558152	2559152	1000	3R	perfectly mapped
1788	2559254	2560254	1000	unmappable	no match
1789	2560356	2561356	1000	X3/X4	perfectly mapped
1790	2561458	2562458	1000	unmappable	no match
1791	2562560	2563560	1000	unmappable	no match
1792	2563662	2564662	1000	unmappable	no match
1793	2564764	2565764	1000	X2	perfectly mapped
1794	2565866	2566866	1000	3CEN	perfectly mapped
1795	2566968	2567968	1000	X2	perfectly mapped
1796	2568070	2569070	1000	unmappable	no match
1797	2569172	2570172	1000	unmappable	disagree
1798	2570274	2571273	999	unmappable	no match
1799	2571375	2572374	999	3CEN	perfectly mapped
1800	2572476	2573475	999	unmappable	no match
1801	2573577	2574576	999	unmappable	no match
1802	2574678	2575677	999	Y	perfectly mapped
1803	2575779	2576778	999	3R	perfectly mapped
1804	2576880	2577879	999	X3/X4	perfectly mapped
1805	2577981	2578980	999	X1	perfectly mapped
1806	2579082	2580081	999	3CEN	perfectly mapped
1807	2580183	2581182	999	Y	perfectly mapped
1808	2581284	2582283	999	Y	perfectly mapped
1809	2582385	2583384	999	unmappable	no match
1810	2583486	2584485	999	unmappable	no match
1811	2584587	2585586	999	X3	perfectly mapped
1812	2585688	2586686	998	unmappable	no match
1813	2586788	2587786	998	XY	perfectly mapped
1814	2587888	2588886	998	unmappable	no match
1815	2588988	2589986	998	Y	perfectly mapped
1816	2590088	2591086	998	unmappable	no match
1817	2591188	2592186	998	X3/X4	perfectly mapped
1818	2592288	2593286	998	unmappable	no match
1819	2593388	2594386	998	unmappable	no match
1820	2594488	2595486	998	unmappable	no match
1821	2595588	2596586	998	X2	perfectly mapped
1822	2596688	2597686	998	X4	perfectly mapped
1823	2597788	2598786	998	3CEN	perfectly mapped
1824	2598888	2599886	998	unmappable	no match
1825	2599988	2600986	998	unmappable	no match
1826	2601088	2602086	998	X1	perfectly mapped
1827	2602188	2603185	997	X3/X4	perfectly mapped
1828	2603287	2604284	997	unmappable	no match
1829	2604386	2605383	997	3CEN	perfectly mapped
1830	2605485	2606482	997	3CEN	perfectly mapped
1831	2606584	2607581	997	unmappable	disagree
1832	2607683	2608680	997	X1	perfectly mapped
1833	2608782	2609779	997	unmappable	no match
1834	2609881	2610878	997	unmappable	no match
1835	2610980	2611977	997	unmappable	no match
1836	2612079	2613076	997	X1	perfectly mapped
1837	2613178	2614175	997	unmappable	no match
1838	2614277	2615274	997	unmappable	no match
1839	2615376	2616373	997	unmappable	no match
1840	2616475	2617472	997	X3/X4	perfectly mapped
1841	2617574	2618571	997	unmappable	no match
1842	2618673	2619670	997	unmappable	no match
1843	2619772	2620769	997	X1	perfectly mapped
1844	2620871	2621868	997	unmappable	no match
1845	2621970	2622967	997	unmappable	no match
1846	2623069	2624066	997	unmappable	no match
1847	2624168	2625165	997	XY	perfectly mapped
1848	2625267	2626264	997	unmappable	no match
1849	2626366	2627363	997	unmappable	no match
1850	2627465	2628461	996	XY	perfectly mapped
1851	2628563	2629559	996	unmappable	no match
1852	2629661	2630657	996	unmappable	no match
1853	2630759	2631755	996	unmappable	no match
1854	2631857	2632853	996	unmappable	no match
1855	2632955	2633951	996	XY	perfectly mapped
1856	2634053	2635049	996	unmappable	no match
1857	2635151	2636147	996	unmappable	no match
1858	2636249	2637245	996	unmappable	no match
1859	2637347	2638343	996	unmappable	no match
1860	2638445	2639441	996	3L	perfectly mapped
1861	2639543	2640539	996	unmappable	no match
1862	2640641	2641637	996	X4	perfectly mapped
1863	2641739	2642735	996	unmappable	no match
1864	2642837	2643833	996	unmappable	no match
1865	2643935	2644931	996	Y	perfectly mapped
1866	2645033	2646029	996	unmappable	no match
1867	2646131	2647126	995	X1	perfectly mapped
1868	2647228	2648223	995	X1	perfectly mapped
1869	2648325	2649320	995	Y	perfectly mapped
1870	2649422	2650417	995	unmappable	no match
1871	2650519	2651514	995	unmappable	no match
1872	2651616	2652611	995	Y	perfectly mapped
1873	2652713	2653708	995	X1	perfectly mapped
1874	2653810	2654805	995	unmappable	no match
1875	2654907	2655902	995	2R	perfectly mapped
1876	2656004	2656999	995	unmappable	no match
1877	2657101	2658096	995	X1	perfectly mapped
1878	2658198	2659193	995	X1	perfectly mapped
1879	2659295	2660290	995	unmappable	no match
1880	2660392	2661387	995	unmappable	no match
1881	2661489	2662483	994	unmappable	no match
1882	2662585	2663579	994	unmappable	no match
1883	2663681	2664675	994	unmappable	no match
1884	2664777	2665771	994	3CEN	perfectly mapped
1885	2665873	2666867	994	unmappable	no match
1886	2666969	2667963	994	unmappable	no match
1887	2668065	2669059	994	unmappable	no match
1888	2669161	2670155	994	X	mapped
1889	2670257	2671251	994	unmappable	no match
1890	2671353	2672347	994	X2	perfectly mapped
1891	2672449	2673443	994	3CEN	perfectly mapped
1892	2673545	2674539	994	XY	perfectly mapped
1893	2674641	2675635	994	X4	perfectly mapped
1894	2675737	2676731	994	X1	perfectly mapped
1895	2676833	2677827	994	unmappable	no match
1896	2677929	2678923	994	unmappable	no match
1897	2679025	2680019	994	unmappable	no match
1898	2680121	2681115	994	X1	perfectly mapped
1899	2681217	2682210	993	unmappable	no match
1900	2682312	2683305	993	unmappable	no match
1901	2683407	2684400	993	unmappable	no match
1902	2684502	2685495	993	unmappable	no match
1903	2685597	2686590	993	unmappable	no match
1904	2686692	2687685	993	3CEN	perfectly mapped
1905	2687787	2688780	993	unmappable	no match
1906	2688882	2689875	993	unmappable	no match
1907	2689977	2690970	993	unmappable	no match
1908	2691072	2692065	993	unmappable	no match
1909	2692167	2693160	993	unmappable	no match
1910	2693262	2694255	993	unmappable	no match
1911	2694357	2695350	993	unmappable	no match
1912	2695452	2696445	993	unmappable	no match
1913	2696547	2697540	993	X1	perfectly mapped
1914	2697642	2698635	993	unmappable	no match
1915	2698737	2699730	993	unmappable	no match
1916	2699832	2700825	993	X1	perfectly mapped
1917	2700927	2701920	993	unmappable	no match
1918	2702022	2703015	993	unmappable	no match
1919	2703117	2704110	993	Y	perfectly mapped
1920	2704212	2705205	993	X1	perfectly mapped
1921	2705307	2706299	992	unmappable	no match
1922	2706401	2707393	992	unmappable	no match
1923	2707495	2708487	992	unmappable	no match
1924	2708589	2709581	992	unmappable	no match
1925	2709683	2710675	992	Y	perfectly mapped
1926	2710777	2711769	992	unmappable	no match
1927	2711871	2712863	992	3CEN	perfectly mapped
1928	2712965	2713957	992	X1	perfectly mapped
1929	2714059	2715051	992	unmappable	no match
1930	2715153	2716145	992	X1	perfectly mapped
1931	2716247	2717239	992	unmappable	no match
1932	2717341	2718333	992	2R	perfectly mapped
1933	2718435	2719427	992	Y	perfectly mapped
1934	2719529	2720521	992	unmappable	no match
1935	2720623	2721615	992	unmappable	no match
1936	2721717	2722709	992	Y	perfectly mapped
1937	2722811	2723803	992	XY	perfectly mapped
1938	2723905	2724897	992	unmappable	no match
1939	2724999	2725990	991	unmappable	no match
1940	2726092	2727083	991	unmappable	no match
1941	2727185	2728176	991	unmappable	no match
1942	2728278	2729269	991	unmappable	no match
1943	2729371	2730362	991	Y	perfectly mapped
1944	2730464	2731455	991	3CEN	perfectly mapped
1945	2731557	2732548	991	unmappable	no match
1946	2732650	2733641	991	unmappable	disagree
1947	2733743	2734734	991	X	perfectly mapped
1948	2734836	2735827	991	X1	perfectly mapped
1949	2735929	2736920	991	unmappable	no match
1950	2737022	2738013	991	unmappable	no match
1951	2738115	2739106	991	3CEN	perfectly mapped
1952	2739208	2740199	991	unmappable	no match
1953	2740301	2741292	991	unmappable	no match
1954	2741394	2742385	991	unmappable	no match
1955	2742487	2743477	990	unmappable	no match
1956	2743579	2744569	990	3CEN	perfectly mapped
1957	2744671	2745661	990	unmappable	no match
1958	2745763	2746753	990	unmappable	no match
1959	2746855	2747845	990	X2	perfectly mapped
1960	2747947	2748937	990	X1	perfectly mapped
1961	2749039	2750029	990	unmappable	no match
1962	2750131	2751121	990	unmappable	no match
1963	2751223	2752213	990	unmappable	no match
1964	2752315	2753305	990	unmappable	no match
1965	2753407	2754397	990	Y	perfectly mapped
1966	2754499	2755489	990	3CEN	perfectly mapped
1967	2755591	2756581	990	unmappable	no match
1968	2756683	2757673	990	unmappable	no match
1969	2757775	2758765	990	unmappable	no match
1970	2758867	2759857	990	3CEN	perfectly mapped
1971	2759959	2760949	990	unmappable	no match
1972	2761051	2762041	990	unmappable	no match
1973	2762143	2763132	989	unmappable	no match
1974	2763234	2764223	989	unmappable	no match
1975	2764325	2765314	989	unmappable	no match
1976	2765416	2766405	989	unmappable	no match
1977	2766507	2767496	989	unmappable	no match
1978	2767598	2768587	989	3CEN	perfectly mapped
1979	2768689	2769678	989	X3/X4	perfectly mapped
1980	2769780	2770769	989	unmappable	no match
1981	2770871	2771860	989	unmappable	no match
1982	2771962	2772951	989	3CEN	perfectly mapped
1983	2773053	2774042	989	unmappable	no match
1984	2774144	2775133	989	unmappable	no match
1985	2775235	2776224	989	Y	perfectly mapped
1986	2776326	2777315	989	unmappable	no match
1987	2777417	2778406	989	Y	perfectly mapped
1988	2778508	2779497	989	X1	perfectly mapped
1989	2779599	2780588	989	X4	perfectly mapped
1990	2780690	2781679	989	X1	perfectly mapped
1991	2781781	2782770	989	unmappable	no match
1992	2782872	2783861	989	unmappable	no match
1993	2783963	2784951	988	unmappable	no match
1994	2785053	2786041	988	3L	mapped
1995	2786143	2787131	988	unmappable	no match
1996	2787233	2788221	988	unmappable	no match
1997	2788323	2789311	988	unmappable	no match
1998	2789413	2790401	988	unmappable	no match
1999	2790503	2791491	988	Y	perfectly mapped
[truncated: 32,631 more rows]
