# Supplementary material for: Mapping the pericentric heterochromatin by comparative genomic hybridization analysis and chromosome deletions in Drosophila melanogaster
Source: HighWire-hosted journal article supplement (doi:10.1101/gr.137406.112), 2012-06-28
Supplement: Supplemental_Table_6-Underreplication_and_Repetitiveness.xlsx [file Supplemental_Table_6-Underreplication_and_Repetitiveness.xlsx]

## Sheet: Sheet1
Probe ID	Category	Cycle14 embryo	Salivary gland	Ovary	Genomic Reads (cn br)	Genomic Reads (ORE R)
A_09_P000046	euchromatic gene	-0.157814	0.0438333	0.02014	22	0
A_09_P000051	euchromatic gene	-0.164511	-0.0843138	-0.24034	18	0
A_09_P000056	euchromatic gene	0.0686199	-0.0982203	-0.265629	25	0
A_09_P000061	euchromatic gene	-0.281476	-0.0344005	0.0659533	25	0
A_09_P000066	euchromatic gene	0.225146	-0.194574	-0.176187	19	0
A_09_P000086	euchromatic gene	-0.0423796	-1.40671	-0.482289	31	0
A_09_P000161	euchromatic gene	-0.0602521	-0.1745	-0.116735	19	0
A_09_P000166	euchromatic gene	-0.0871289	-0.0027459	-0.141843	14	0.3058
A_09_P000196	euchromatic gene	-0.144429	0.0185044	-0.0192843	26	0
A_09_P000201	euchromatic gene	0.0721705	-0.141971	-0.249445	23	0
A_09_P000206	euchromatic gene	0.0803878	-0.0201799	-0.0932822	29	0
A_09_P000261	euchromatic gene	-0.122469	-0.0350942	-0.107779	23	0
A_09_P000346	euchromatic gene	-0.123364	-0.114121	-0.150802	20	0
A_09_P000356	euchromatic gene	-0.293402	0.0383685	0.177246	19	0
A_09_P000361	euchromatic gene	-0.233339	0.0834143	-0.0887686	13	0
A_09_P000366	euchromatic gene	-0.216186	-0.0741967	0.0273891	23	0
A_09_P000371	euchromatic gene	-0.3932	0.142719	0.128329	18	0
A_09_P000376	euchromatic gene	-0.105083	0.119497	-0.0331783	24	0
A_09_P000381	euchromatic gene	0.0987691	-0.0239407	-0.211777	15	0
A_09_P000391	euchromatic gene	-0.0766029	-0.0100724	-0.189261	20	0
A_09_P000446	euchromatic gene	-0.221868	-0.264215	-0.524995	27	0
A_09_P000451	euchromatic gene	-0.135467	-0.2033	-0.324284	16	0
A_09_P000456	euchromatic gene	-0.211387	-0.410466	-0.439103	24	0
A_09_P000466	euchromatic gene	-0.570947	0.0965159	0.276501	4	0
A_09_P000531	euchromatic gene	-0.298722	-0.202662	-0.176192	1	0
A_09_P000546	euchromatic gene	-0.169775	0.017962	-0.130286	17	0
A_09_P000771	euchromatic gene	0.0183086	-0.846407	-0.508324	0	0
A_09_P000781	euchromatic gene	0.104018	0.164762	0.139794	35	0
A_09_P000806	euchromatic gene	-0.12104	-0.539314	-0.588102	18	0
A_09_P000811	euchromatic gene	-0.0157114	-0.460094	-0.49322	14	0
A_09_P000831	euchromatic gene	-0.232301	0.0769485	0.0629137	16	0
A_09_P000951	euchromatic gene	-0.175394	0.0286587	0.000872844	24	0
A_09_P000976	euchromatic gene	0.0124251	-0.433862	-0.679001	12	0
A_09_P000991	euchromatic gene	-0.400207	0.0292054	0.103333	22	0
A_09_P001001	euchromatic gene	-0.00475498	0.0430085	-0.0115445	0	0
A_09_P001006	euchromatic gene	-0.27636	0.0514619	0.0509473	23	0
A_09_P001026	euchromatic gene	-0.213784	0.0242998	0.0378894	17	0
A_09_P001176	euchromatic gene	-0.0726633	-0.105909	0.0375393	17	0
A_09_P001186	euchromatic gene	-0.0383734	-0.125032	-0.21262	16	0
A_09_P001456	euchromatic gene	-0.204308	-0.334963	-0.0425597	11	0
A_09_P001461	euchromatic gene	0.205491	-0.595116	-0.248738	20	0.3058
A_09_P001471	euchromatic gene	-0.0204693	-0.145992	-0.0132816	19	0
A_09_P001811	euchromatic gene	-0.0261165	-0.647247	-0.295122	12	0.3058
A_09_P002076	euchromatic gene	-0.429002	0.299906	0.241672	29	0
A_09_P002081	euchromatic gene	-0.0650748	-0.0570999	0.484146	14	0
A_09_P002086	euchromatic gene	-0.0862063	-0.0108291	-0.18251	11	0
A_09_P002136	euchromatic gene	-0.352649	0.140751	0.162291	15	0
A_09_P002141	euchromatic gene	0.129806	-0.159742	0.027095	4	0
A_09_P002166	euchromatic gene	-0.0590511	0.0531804	-0.0621742	13	0.3058
A_09_P002206	euchromatic gene	0.0395455	-0.141223	-0.164916	16	0
A_09_P002346	euchromatic gene	0.0665292	-0.341915	-0.0430101	20	0
A_09_P002351	euchromatic gene	-0.475841	-0.379495	0.0765952	17	0.3058
A_09_P002466	euchromatic gene	-0.0494407	0.0412087	0.0651054	20	0
A_09_P002486	euchromatic gene	-0.417303	-0.354463	0.0228009	17	0
A_09_P002506	euchromatic gene	-0.0318638	-2.77158	-0.958518	21	0
A_09_P002521	euchromatic gene	-0.0311119	0.0228378	-0.176842	21	0
A_09_P002601	euchromatic gene	0.0191128	-0.201672	-0.248734	17	0
A_09_P002606	euchromatic gene	-0.292257	0.079592	0.157515	17	0
A_09_P002611	euchromatic gene	-0.550363	0.333328	0.219003	24	0
A_09_P002636	euchromatic gene	0.0532842	-0.169087	-0.280721	23	0
A_09_P002646	euchromatic gene	-0.0443615	0.012864	-0.148618	22	0
A_09_P002661	euchromatic gene	-0.174223	0.0300695	-0.0172492	10	0
A_09_P002981	euchromatic gene	-0.546314	0.203288	0.236007	22	0
A_09_P002986	euchromatic gene	-0.0940229	-0.185305	-0.11845	24	0
A_09_P002991	euchromatic gene	-0.0790352	-0.40613	-0.188178	25	0.3058
A_09_P002996	euchromatic gene	-0.0776072	0.0498475	0.0143498	1	0
A_09_P003001	euchromatic gene	-0.367241	0.0910316	0.126438	24	0
A_09_P003006	euchromatic gene	0.112821	0.642927	0.150259	16	0
A_09_P003011	euchromatic gene	-0.125901	0.776948	-0.27653	8	0.3058
A_09_P003016	euchromatic gene	-0.309303	-1.7375	0.0705005	15	0.3058
A_09_P003021	euchromatic gene	0.116294	-2.54362	-0.28507	18	0
A_09_P003026	euchromatic gene	-0.163334	-2.81124	-0.712823	23	0
A_09_P003031	euchromatic gene	-0.19845	-1.50329	-0.641723	17	0
A_09_P003036	euchromatic gene	-0.135136	0.0967877	-0.220137	10	0
A_09_P003041	euchromatic gene	-0.309115	0.112043	0.148872	12	0
A_09_P003051	euchromatic gene	-0.247137	0.00993056	0.0684546	18	0
A_09_P003056	euchromatic gene	-0.0585044	0.299068	0.165978	17	0
A_09_P003061	euchromatic gene	-0.29324	-0.130904	0.00487317	13	0
A_09_P003066	euchromatic gene	-0.182437	0.131316	-0.0760778	23	0
A_09_P003071	euchromatic gene	-0.19713	0.124229	0.139661	18	0.3058
A_09_P003076	euchromatic gene	-0.228811	0.149566	-0.0239231	0	0
A_09_P003081	euchromatic gene	0.248363	-0.0617676	-0.342801	15	0
A_09_P003086	euchromatic gene	-0.342694	0.117781	0.171074	17	0
A_09_P003091	euchromatic gene	-0.193761	0.0788967	0.00499186	23	0
A_09_P003721	euchromatic gene	-0.222512	0.209529	0.147222	25	0
A_09_P003831	euchromatic gene	-0.572681	0.19088	0.168285	16	0.3058
A_09_P003836	euchromatic gene	-0.232443	0.211419	0.00504538	18	0
A_09_P003846	euchromatic gene	-0.177193	0.00422232	0.146886	18	0
A_09_P003851	euchromatic gene	-0.168908	-0.0110898	-0.0487724	21	0.3058
A_09_P003861	euchromatic gene	0.131612	-0.21045	-0.155147	17	0
A_09_P003896	euchromatic gene	-0.469112	-0.720424	-0.0564345	15	0.6116
A_09_P003991	euchromatic gene	-0.438631	0.143537	0.332004	19	0
A_09_P003996	euchromatic gene	-0.0279451	-0.136434	-0.255641	18	0
A_09_P004031	euchromatic gene	-0.156811	0.0226848	-0.245047	16	0
A_09_P004056	euchromatic gene	-0.26539	-0.0653954	0.0140362	22	0
A_09_P004061	euchromatic gene	-0.164528	0.00494879	-0.264065	15	0
A_09_P004071	euchromatic gene	-0.0658455	-0.62395	-0.21449	21	0
A_09_P004076	euchromatic gene	-0.00879263	0.026287	-0.0950038	15	0
A_09_P004136	euchromatic gene	-0.270226	0.378105	0.167451	20	0
A_09_P004141	euchromatic gene	-0.161926	0.146192	0.0202165	17	0
A_09_P004146	euchromatic gene	-0.0756542	0.14119	-0.119235	20	0
A_09_P004151	euchromatic gene	-0.313326	-0.0230206	-0.0948339	18	0
A_09_P004171	euchromatic gene	-0.073481	-0.0873555	-0.0289706	23	0.3058
A_09_P004221	euchromatic gene	0.0858112	-0.171493	-0.312859	12	0
A_09_P004356	euchromatic gene	-0.381519	0.327407	0.149884	24	0
A_09_P004361	euchromatic gene	-0.199291	0.241574	0.24485	17	0
A_09_P004466	euchromatic gene	-0.243973	0.112987	-0.0352501	9	0
A_09_P004471	euchromatic gene	-0.322808	0.308835	0.155971	20	0
A_09_P004501	euchromatic gene	-0.122623	0.154001	-0.0781905	21	0
A_09_P004506	euchromatic gene	-0.0243748	0.0448846	-0.0851817	17	0
A_09_P009516	euchromatic gene	-0.0813735	0.0862971	0.0593062	18	0
A_09_P009581	euchromatic gene	-0.530079	0.267297	0.24518	10	0
A_09_P009621	euchromatic gene	-0.22617	0.0380596	-0.0351811	8	0
A_09_P009736	euchromatic gene	-0.225788	0.0308648	-0.168227	16	0
A_09_P009786	euchromatic gene	-0.138828	-0.0282814	-0.0209326	15	0
A_09_P009826	euchromatic gene	-0.085589	0.154037	0.0234958	20	0
A_09_P009856	euchromatic gene	-0.302006	-0.431921	-0.0102566	13	0
A_09_P009926	euchromatic gene	-0.0649797	0.0507243	-0.345056	19	0
A_09_P009936	euchromatic gene	-0.325723	0.165206	0.194261	26	0.6116
A_09_P009941	euchromatic gene	-0.334708	0.0342913	0.0843398	11	0.6116
A_09_P009961	euchromatic gene	-0.174759	-0.0868808	-0.00435533	16	0
A_09_P009966	euchromatic gene	-0.18993	-0.0398231	-0.0830229	24	0
A_09_P009986	euchromatic gene	-0.249313	-0.04487	0.0437477	13	0
A_09_P010001	euchromatic gene	-0.163549	-0.0185957	-0.0684443	18	0
A_09_P010006	euchromatic gene	-0.38018	0.0862908	0.285941	12	0
A_09_P010011	euchromatic gene	-0.00468898	-0.248418	0.0774316	18	0
A_09_P010016	euchromatic gene	-0.135532	0.0345923	1.27649	27	0.3058
A_09_P010041	euchromatic gene	-0.0933632	0.061663	-0.0566811	12	0
A_09_P010051	euchromatic gene	-0.0602857	-0.0894643	-0.286824	14	0
A_09_P010146	euchromatic gene	-0.302038	0.0834228	-0.01108	26	0
A_09_P010246	euchromatic gene	-0.357406	0.281982	0.279957	27	0
A_09_P010251	euchromatic gene	-0.410928	0.130605	0.247366	8	0
A_09_P010351	euchromatic gene	-0.496637	0.00160188	0.19568	19	0
A_09_P010416	euchromatic gene	-0.112774	-0.112781	0.0409035	22	0
A_09_P010466	euchromatic gene	-0.386738	0.139299	-0.0497551	20	0
A_09_P010516	euchromatic gene	-0.21572	0.146748	0.152254	16	0
A_09_P010521	euchromatic gene	-0.194219	0.0599679	0.129113	17	0
A_09_P010526	euchromatic gene	-0.471454	-0.514369	0.0652451	21	0
A_09_P010536	euchromatic gene	-0.384177	0.124077	0.196132	26	0
A_09_P010636	euchromatic gene	0.0228912	0.0163758	0.0523893	14	0
A_09_P010706	euchromatic gene	-0.00641481	0.01139	-0.191415	13	0
A_09_P010741	euchromatic gene	-0.217423	-0.52045	-0.0481624	18	0
A_09_P010756	euchromatic gene	-0.221963	0.102913	-0.101939	23	0
A_09_P010761	euchromatic gene	-0.476007	0.223058	0.128753	23	0
A_09_P010846	euchromatic gene	-0.701774	0.386445	0.229149	20	0
A_09_P010861	euchromatic gene	-0.0741445	-0.136129	-0.139958	19	0
A_09_P011056	euchromatic gene	0.077525	-0.582179	-0.505078	14	0
A_09_P011066	euchromatic gene	-0.166393	0.0532634	-0.0167299	17	0
A_09_P011091	euchromatic gene	-0.220868	0.187475	-0.0118911	27	0
A_09_P011096	euchromatic gene	-0.642666	-0.518954	0.860388	11	0
A_09_P011136	euchromatic gene	-0.23578	-0.194396	-0.26896	23	0
A_09_P011176	euchromatic gene	-0.755207	-0.0351549	0.460956	25	0
A_09_P011181	euchromatic gene	-0.202037	0.0881654	0.232598	14	0.3058
A_09_P011196	euchromatic gene	0.060922	-0.127167	-0.135749	16	0
A_09_P011271	euchromatic gene	-0.20783	0.0307266	-0.0392418	22	0
A_09_P011276	euchromatic gene	-0.206712	0.110095	-0.0258654	16	0
A_09_P011341	euchromatic gene	-0.227587	0.107008	-0.0813526	13	0
A_09_P011346	euchromatic gene	-0.229503	0.108011	0.0740777	21	0
A_09_P011416	euchromatic gene	0.0121091	0.013478	-0.189241	18	0
A_09_P011421	euchromatic gene	-0.0827232	0.049181	0.0317899	19	0
A_09_P011471	euchromatic gene	-0.10003	-0.26213	-0.0823058	10	0
A_09_P011526	euchromatic gene	-0.089167	0.0127149	-0.0643811	21	0
A_09_P011536	euchromatic gene	-0.586331	0.120333	0.773587	29	0
A_09_P011561	euchromatic gene	-0.294201	0.0215108	-0.0333452	18	0
A_09_P011566	euchromatic gene	-0.217764	0.176692	-0.00790635	25	0
A_09_P011741	euchromatic gene	-0.00424514	-0.253198	-0.0466077	18	0
A_09_P011746	euchromatic gene	-0.0795729	0.0445031	-0.0449346	24	0
A_09_P011771	euchromatic gene	-0.311297	0.206946	0.0371405	16	0
A_09_P011781	euchromatic gene	-0.267353	0.178614	0.183609	4	0
A_09_P011786	euchromatic gene	-0.0712695	-0.101754	-0.10617	16	0
A_09_P011806	euchromatic gene	-0.211549	0.0586325	-0.17484	25	0.3058
A_09_P011816	euchromatic gene	-0.0605483	-0.0518059	-0.157733	29	0
A_09_P011831	euchromatic gene	0.185353	-0.45987	-0.423675	31	0
A_09_P011936	euchromatic gene	-0.132104	-0.295008	-0.0282495	16	0
A_09_P011941	euchromatic gene	-0.122057	-0.141489	-0.145184	16	0
A_09_P011946	euchromatic gene	-0.404081	0.0731013	0.205929	18	0
A_09_P011986	euchromatic gene	-0.312524	-0.201847	0.0531213	25	0
A_09_P012051	euchromatic gene	-0.0655595	0.032241	-0.0921708	13	0
A_09_P012056	euchromatic gene	0.00322426	-0.0683119	-0.0758761	19	0
A_09_P012116	euchromatic gene	-0.188296	0.132723	-0.0568257	15	0
A_09_P012121	euchromatic gene	-1.45968	0.146637	0.469212	16	0
A_09_P012126	euchromatic gene	-0.492266	0.232674	0.37483	11	0
A_09_P012156	euchromatic gene	-0.100316	-0.0761766	-0.123868	16	0
A_09_P012161	euchromatic gene	-0.2296	0.124168	0.0374742	12	0
A_09_P012201	euchromatic gene	-0.0206147	-0.0553274	-0.289879	16	0
A_09_P012211	euchromatic gene	-0.308804	0.254737	0.156454	15	0
A_09_P012231	euchromatic gene	-0.210801	-0.0550916	0.0835158	18	0.3058
A_09_P012341	euchromatic gene	-0.338632	-0.012279	0.173007	11	0
A_09_P012376	euchromatic gene	-0.0624604	-0.0450675	-0.221339	19	0
A_09_P012386	euchromatic gene	-0.117753	0.0427539	-0.197117	20	0
A_09_P012411	euchromatic gene	-0.0560532	-0.140538	-0.488509	20	0
A_09_P012436	euchromatic gene	-0.268464	-0.158261	0.178811	21	0
A_09_P012471	euchromatic gene	-0.463224	0.278576	0.191332	14	0
A_09_P012531	euchromatic gene	0.0420576	-0.00796334	-0.0813731	22	0
A_09_P012561	euchromatic gene	-0.141363	-0.0273861	-0.105753	22	0
A_09_P012566	euchromatic gene	-0.146665	-0.11399	-0.000316427	6	0
A_09_P012571	euchromatic gene	-0.199401	-0.156488	0.135552	11	0.3058
A_09_P012596	euchromatic gene	-0.222294	0.100322	0.0381097	18	0
A_09_P012616	euchromatic gene	-0.123324	-0.118775	-0.199321	19	0
A_09_P012651	euchromatic gene	-0.33537	0.302205	0.104622	12	0
A_09_P012666	euchromatic gene	-0.566378	0.179191	0.118819	23	0
A_09_P012671	euchromatic gene	-0.0166494	0.0178421	0.00835418	20	0
A_09_P012686	euchromatic gene	0.00656751	-0.0286279	-0.0880149	18	0
A_09_P012726	euchromatic gene	-0.331308	0.177171	0.208374	15	0
A_09_P012861	euchromatic gene	-0.367389	-0.108168	-0.170714	14	0
A_09_P012886	euchromatic gene	-0.164613	0.16414	-0.0813652	15	0
A_09_P012901	euchromatic gene	-0.243327	0.039055	-0.120177	18	0
A_09_P012906	euchromatic gene	-0.208142	0.0849259	0.280835	29	0.3058
A_09_P012931	euchromatic gene	0.0253167	-0.139546	-0.194671	17	0
A_09_P012936	euchromatic gene	-0.257812	0.110474	-0.0252022	16	0
A_09_P012946	euchromatic gene	-0.141387	-0.321782	-0.105952	13	0
A_09_P012956	euchromatic gene	-0.205194	-0.134991	-0.0887916	18	0
A_09_P012971	euchromatic gene	-0.120611	0.00932375	0.0343089	19	0
A_09_P012976	euchromatic gene	-0.172532	0.300218	0.228115	20	0.3058
A_09_P012991	euchromatic gene	-0.296993	0.0754392	0.388881	12	0
A_09_P013001	euchromatic gene	-0.16504	0.0398722	0.0432241	12	0
A_09_P013041	euchromatic gene	-0.0848154	-0.122235	-0.0802452	20	0
A_09_P013076	euchromatic gene	-0.155718	0.272967	0.115481	11	0
A_09_P013086	euchromatic gene	-0.0916945	-0.493739	-0.369202	34	0.6116
A_09_P013106	euchromatic gene	-0.163665	0.00262194	-0.10899	20	0
A_09_P013181	euchromatic gene	-0.143232	0.127473	-0.252178	16	0
A_09_P013196	euchromatic gene	-0.115896	-0.0440629	0.160177	16	0
A_09_P013231	euchromatic gene	-0.0370159	0.0864	-0.218411	17	0
A_09_P013261	euchromatic gene	-0.259134	-0.0297764	0.0980563	7	0
A_09_P013266	euchromatic gene	-0.0434087	0.00125933	-0.192161	19	0
A_09_P013281	euchromatic gene	-0.297098	-0.0477195	0.00109432	19	0
A_09_P013301	euchromatic gene	-0.184418	0.295128	-0.0337296	11	0
A_09_P013381	euchromatic gene	0.0475764	0.077852	-0.0425109	23	0
A_09_P013411	euchromatic gene	0.0818311	-0.0616636	-0.143785	12	0
A_09_P013421	euchromatic gene	-0.309192	0.179067	0.0900436	1	0
A_09_P013431	euchromatic gene	-0.140699	-0.0609415	-0.140405	20	0
A_09_P013461	euchromatic gene	-0.19604	0.19415	0.17266	23	0
A_09_P013481	euchromatic gene	-0.34122	0.310041	-0.049635	17	0
A_09_P013526	euchromatic gene	-0.228981	0.0313573	0.0270609	10	0
A_09_P013531	euchromatic gene	0.0691353	-0.160199	-0.133157	11	0.3058
A_09_P013536	euchromatic gene	-0.0755763	0.213971	-0.101323	12	0.3058
A_09_P013541	euchromatic gene	0.0727372	-0.156519	-0.11967	16	0
A_09_P013546	euchromatic gene	-0.165988	-0.383105	-0.0990414	12	0
A_09_P013551	euchromatic gene	-0.278641	-0.0268781	-0.18885	24	0
A_09_P013556	euchromatic gene	-0.113493	0.0525316	-0.0851659	14	0
A_09_P013561	euchromatic gene	0.0311062	-0.186605	-0.190139	10	0
A_09_P013566	euchromatic gene	-0.230076	0.048464	-0.0639158	22	0
A_09_P013571	euchromatic gene	-0.138115	-0.504197	-0.0747376	21	0
A_09_P013576	euchromatic gene	-0.174415	-0.145091	-0.0771914	20	0
A_09_P013581	euchromatic gene	-0.144225	0.0673208	0.165429	12	0
A_09_P013586	euchromatic gene	-0.229651	0.0776601	-0.183314	21	0
A_09_P013591	euchromatic gene	-0.31361	-0.390161	0.0109924	10	0
A_09_P013596	euchromatic gene	0.0613776	-0.213796	-0.139875	24	0
A_09_P013601	euchromatic gene	0.0256488	-0.507699	-0.0250381	51	0
A_09_P013606	euchromatic gene	-0.104189	-0.0410108	0.0970077	19	0
A_09_P013611	euchromatic gene	-0.155903	0.172032	-0.006805	17	0
A_09_P013616	euchromatic gene	-0.206131	0.0200511	-0.138854	15	0
A_09_P013621	euchromatic gene	0.129325	-0.118436	-0.263504	28	0
A_09_P013626	euchromatic gene	-0.381962	0.245984	0.435913	22	0
A_09_P013631	euchromatic gene	-0.0182327	0.198877	-0.000358049	20	0
A_09_P013636	euchromatic gene	-0.466878	0.319935	0.190016	8	0
A_09_P013641	euchromatic gene	-0.13985	0.094942	-0.235657	15	0
A_09_P013646	euchromatic gene	-0.205106	0.141192	0.0664194	21	0
A_09_P013656	euchromatic gene	-0.337213	0.158476	0.101795	20	0
A_09_P013661	euchromatic gene	-0.25111	-0.0252712	-0.088278	11	0
A_09_P013666	euchromatic gene	-0.129277	-0.112162	-0.0442845	11	0
A_09_P013671	euchromatic gene	-0.120061	-0.132537	-0.0575034	14	0
A_09_P013676	euchromatic gene	-0.0447024	-0.120608	-0.0529269	13	0.3058
A_09_P013681	euchromatic gene	-0.403056	0.35866	0.184051	23	0
A_09_P013686	euchromatic gene	0.0873058	-0.0996505	-0.146777	11	0
A_09_P013691	euchromatic gene	-0.190889	0.22588	0.0644207	23	0
A_09_P013696	euchromatic gene	-0.214203	0.0908979	-0.051386	12	0.3058
A_09_P013701	euchromatic gene	-0.186812	0.0882559	0.127793	6	0
A_09_P013706	euchromatic gene	-0.144157	-3.00561	-1.40604	18	0.6116
A_09_P013711	euchromatic gene	-0.200016	-0.193004	-0.079604	7	0
A_09_P013716	euchromatic gene	0.0270577	-0.712944	-0.359602	17	0.3058
A_09_P013721	euchromatic gene	-0.145928	-0.298078	-0.504357	9	0.3058
A_09_P013726	euchromatic gene	-0.106448	-0.360868	-0.500644	22	0.3058
A_09_P013731	euchromatic gene	0.0778456	-0.112396	-0.208176	23	0
A_09_P013736	euchromatic gene	-0.149109	0.164458	0.126952	19	0
A_09_P013741	euchromatic gene	0.020195	0.061522	-0.108848	13	0
A_09_P013746	euchromatic gene	0.317051	-0.0993072	-0.180316	24	0
A_09_P013751	euchromatic gene	0.0411363	-0.208676	-0.0700166	24	0.3058
A_09_P013756	euchromatic gene	-0.183393	0.0734463	0.00920933	18	0
A_09_P013761	euchromatic gene	0.151017	-0.246452	-0.230315	17	0
A_09_P013766	euchromatic gene	-0.0355063	-0.512797	-0.500769	25	0
A_09_P013771	euchromatic gene	-0.170383	0.0583738	-0.0317096	24	0
A_09_P013776	euchromatic gene	-0.099809	-0.0824432	-0.0927217	22	0
A_09_P013781	euchromatic gene	-0.378322	0.343538	0.260255	23	0.3058
A_09_P013786	euchromatic gene	0.0745948	-1.84188	-0.603333	10	0.6116
A_09_P013791	euchromatic gene	-0.149569	0.111806	-0.0262958	12	0
A_09_P013806	euchromatic gene	-0.224237	0.133997	0.143598	24	0
A_09_P013811	euchromatic gene	0.0455065	-0.212595	-0.0184673	13	0
A_09_P013816	euchromatic gene	0.0288193	0.195037	-0.0699762	17	0
A_09_P013821	euchromatic gene	0.0187307	-0.000416557	-0.0885906	12	0.3058
A_09_P013826	euchromatic gene	-0.0703387	0.0322465	0.0921066	16	0
A_09_P013831	euchromatic gene	-0.259113	0.0322029	-0.139817	17	0.3058
A_09_P013836	euchromatic gene	-0.318468	-1.91029	-0.116984	11	0
A_09_P013841	euchromatic gene	-0.156099	-0.0496886	0.010554	23	0
A_09_P013846	euchromatic gene	-0.442926	-0.431277	0.0546798	27	0.3058
A_09_P013851	euchromatic gene	0.0323182	-0.12961	-0.192017	22	0.3058
A_09_P013856	euchromatic gene	0.129147	-0.264906	-0.218984	13	0
A_09_P013861	euchromatic gene	-0.101833	-0.197738	0.0489043	15	0
A_09_P013866	euchromatic gene	0.0490859	-0.376618	-0.104141	21	0
A_09_P013871	euchromatic gene	-0.177998	0.125461	0.0769378	23	0
A_09_P013876	euchromatic gene	-0.11881	-0.157785	0.0110618	15	0
A_09_P013886	euchromatic gene	-0.181546	0.0395842	0.0409896	27	0.3058
A_09_P013891	euchromatic gene	-0.280619	0.0173238	0.0636486	21	0
A_09_P013896	euchromatic gene	-0.198195	0.0344987	0.0631041	19	0
A_09_P013901	euchromatic gene	0.121891	-0.225247	-0.208417	18	0
A_09_P013906	euchromatic gene	-0.0994475	-0.122857	-0.0544612	30	0
A_09_P013911	euchromatic gene	-0.691003	0.468433	0.712405	16	0
A_09_P013916	euchromatic gene	0.151256	-0.138646	-0.217192	30	0
A_09_P013921	euchromatic gene	-0.14639	-0.0224055	-0.171886	11	0
A_09_P013926	euchromatic gene	-0.170379	0.058656	-0.0833694	22	0
A_09_P013931	euchromatic gene	-0.376213	-0.00779043	0.158107	15	0
A_09_P013936	euchromatic gene	-0.549662	0.351592	0.316942	13	0
A_09_P013941	euchromatic gene	-0.396286	0.445682	0.154226	15	0
A_09_P013946	euchromatic gene	-0.197781	0.0520689	0.00251996	25	0.3058
A_09_P013951	euchromatic gene	0.00890891	-0.075954	-0.0699833	20	0
A_09_P013956	euchromatic gene	0.00518366	0.131922	-0.0137575	11	0
A_09_P013961	euchromatic gene	-0.116224	-0.0464187	0.00271849	19	0
A_09_P013981	euchromatic gene	-0.185004	0.0941913	-0.0212785	4	0
A_09_P013986	euchromatic gene	0.0928124	-0.266519	-0.278609	12	0.3058
A_09_P013991	euchromatic gene	-0.209001	0.162639	0.00352296	0	0
A_09_P013996	euchromatic gene	-0.395278	0.1223	0.0855393	30	0
A_09_P014001	euchromatic gene	-0.0118794	-0.360317	-0.0658133	3	0
A_09_P014006	euchromatic gene	-0.160309	-0.0996976	0.055643	33	0
A_09_P014011	euchromatic gene	-0.0146506	-0.0285657	-0.227946	7	0
A_09_P014016	euchromatic gene	-0.0167675	-0.150037	-0.116298	18	0
A_09_P014026	euchromatic gene	-0.189975	0.0125004	-0.0417561	26	0
A_09_P014031	euchromatic gene	-0.476795	0.212501	0.164237	18	0.6116
A_09_P014036	euchromatic gene	-0.333461	0.197059	-0.00279426	24	0
A_09_P014041	euchromatic gene	-0.0363362	0.0146649	0.0277049	10	0.3058
A_09_P014046	euchromatic gene	-0.221941	-0.666837	-0.43391	19	0
A_09_P014051	euchromatic gene	-0.333651	-0.0384964	-0.0556287	15	0.3058
A_09_P014056	euchromatic gene	-0.224338	0.102954	0.0538848	14	0
A_09_P014061	euchromatic gene	0.256107	-0.979214	-0.831441	0	0
A_09_P014071	euchromatic gene	-0.112357	0.0641243	-0.0494364	17	0.6116
A_09_P014076	euchromatic gene	-0.158232	0.0791469	-0.216705	23	0
A_09_P014081	euchromatic gene	-0.518266	0.256032	0.0975471	11	0
A_09_P014091	euchromatic gene	-0.144988	0.0542781	-0.166459	22	0
A_09_P014096	euchromatic gene	-0.130886	0.148065	-0.0935328	20	0
A_09_P014101	euchromatic gene	-0.0119201	-0.170112	-0.198986	13	0
A_09_P014106	euchromatic gene	-0.154854	0.100808	-0.05038	19	0
A_09_P014111	euchromatic gene	-0.146486	-0.104652	-0.0393647	24	0
A_09_P014116	euchromatic gene	0.0118968	-0.0744579	-0.162937	20	0
A_09_P014121	euchromatic gene	-0.309955	-0.39677	-0.403982	14	0
A_09_P014126	euchromatic gene	-0.541875	0.136164	0.262243	20	0
A_09_P014131	euchromatic gene	0.0350088	-0.236682	-0.176657	18	0
A_09_P014136	euchromatic gene	-0.00298247	-0.0828889	0.0178514	16	0.6116
A_09_P014141	euchromatic gene	-0.157907	0.112858	-0.0281215	29	0
A_09_P014146	euchromatic gene	-0.313118	0.0169943	0.0530915	11	0
A_09_P014151	euchromatic gene	-0.0387286	-0.0402093	-0.143008	20	0
A_09_P014156	euchromatic gene	-0.353896	0.269015	0.243239	14	0
A_09_P014161	euchromatic gene	-0.140114	-0.171042	-0.151773	18	0.3058
A_09_P014166	euchromatic gene	-0.150187	0.115393	-0.0966144	13	0
A_09_P014176	euchromatic gene	-0.375362	0.0952295	0.114252	30	0.3058
A_09_P014181	euchromatic gene	-0.309637	0.0628144	-0.000900855	23	0
A_09_P014186	euchromatic gene	-0.250493	-0.0598821	-0.0360036	14	0
A_09_P014191	euchromatic gene	-0.396824	-0.0933254	0.0944198	0	0
A_09_P014196	euchromatic gene	-0.0671446	-0.0155204	0.0358347	12	0
A_09_P014201	euchromatic gene	-0.0587311	-0.0304809	-0.00838877	18	0
A_09_P014206	euchromatic gene	-0.070284	-0.199745	0.00727312	18	0
A_09_P014211	euchromatic gene	-0.198436	0.085937	-0.0594756	14	0
A_09_P014216	euchromatic gene	-0.392584	0.233831	0.12242	14	0
A_09_P014221	euchromatic gene	-0.460171	0.402582	0.245702	24	0
A_09_P014226	euchromatic gene	0.185924	0.0119599	-0.0322237	24	0
A_09_P014231	euchromatic gene	-0.342078	0.172362	0.221149	19	0.6116
A_09_P014241	euchromatic gene	-0.302949	0.00453682	-0.108807	21	0
A_09_P015631	euchromatic gene	0.172016	-0.300068	-0.14427	25	0
A_09_P016556	euchromatic gene	-0.237341	0.115716	0.166905	25	0
A_09_P016561	euchromatic gene	0.105721	-0.180032	-0.204944	16	0
A_09_P016566	euchromatic gene	-0.18747	0.056166	0.0181469	17	0
A_09_P016646	euchromatic gene	-0.145482	0.180245	-0.0512847	17	0.3058
A_09_P016651	euchromatic gene	0.132735	-0.106906	-0.140315	14	0
A_09_P016656	euchromatic gene	-0.193696	-0.0876795	0.0179916	26	0
A_09_P016661	euchromatic gene	-0.108883	-0.0293337	-0.113064	26	0
A_09_P016666	euchromatic gene	-0.116881	0.0961326	-0.0709279	12	0
A_09_P016671	euchromatic gene	-0.197867	0.261854	0.0885422	22	0
A_09_P016676	euchromatic gene	-0.218236	0.0521104	0.0360175	27	0
A_09_P016681	euchromatic gene	-0.0855134	-0.218861	-0.180884	26	0
A_09_P016686	euchromatic gene	-0.436484	0.238064	0.184762	15	0
A_09_P016691	euchromatic gene	-0.151265	-0.147386	-0.101956	23	0.3058
A_09_P016696	euchromatic gene	0.049375	-0.0258009	-0.0801919	18	0.3058
A_09_P016851	euchromatic gene	-0.445253	0.119848	0.363187	15	0
A_09_P016856	euchromatic gene	-0.0581982	-0.494251	-0.218646	17	0
A_09_P016861	euchromatic gene	-0.0144996	0.0129193	-0.157862	12	0
A_09_P016866	euchromatic gene	-0.414496	0.227671	0.164738	22	0
A_09_P016871	euchromatic gene	-0.0587292	-0.0806886	-0.249154	14	0
A_09_P016876	euchromatic gene	-0.136304	0.104051	0.0902089	22	0
A_09_P016886	euchromatic gene	-0.180737	-0.254776	0.000380177	10	0
A_09_P016891	euchromatic gene	-0.0747767	-0.356039	-0.441845	20	0
A_09_P016896	euchromatic gene	-0.235455	0.0163093	0.0579133	24	0
A_09_P016901	euchromatic gene	-0.208642	0.106961	-0.0362435	15	0
A_09_P017071	euchromatic gene	0.115601	-0.103502	-0.485331	13	0
A_09_P017076	euchromatic gene	-0.234832	-0.963006	-0.538938	17	0
A_09_P017391	euchromatic gene	-0.35454	0.00476715	0.131054	12	0
A_09_P017396	euchromatic gene	-0.35959	0.0537327	0.244282	17	0
A_09_P017456	euchromatic gene	-0.146187	0.055829	0.0898368	21	0.3058
A_09_P017461	euchromatic gene	0.0486505	0.0283694	-0.252086	19	0
A_09_P017466	euchromatic gene	-0.114446	0.0771864	0.114444	22	0.917399
A_09_P017471	euchromatic gene	-0.462879	-0.109899	-0.265621	10	0
A_09_P017476	euchromatic gene	-0.17425	-0.0229273	-0.0490512	24	0.3058
A_09_P017481	euchromatic gene	-0.17552	0.00997644	-0.021538	10	0.3058
A_09_P017486	euchromatic gene	-0.141639	0.0526175	-0.178259	21	0
A_09_P017491	euchromatic gene	-0.322484	0.0570094	-0.0671285	12	0
A_09_P017496	euchromatic gene	-0.271599	0.181016	-0.00151986	23	0
A_09_P017501	euchromatic gene	0.0108126	-1.93639	-0.608502	26	0
A_09_P017506	euchromatic gene	-0.0105071	0.0436466	-0.0987265	21	0
A_09_P017511	euchromatic gene	0.0864599	-0.0251099	0.0555426	16	0
A_09_P017516	euchromatic gene	-0.0424288	0.148981	0.038965	13	0
A_09_P017691	euchromatic gene	0.0389022	-0.764165	-0.319092	28	0
A_09_P017782	euchromatic gene	-0.0247429	-0.139365	-0.0430561	28	0
A_09_P017786	euchromatic gene	-0.0271765	-0.141287	-0.230132	17	0.3058
A_09_P017791	euchromatic gene	0.0623781	0.0118818	-0.116963	11	0
A_09_P017796	euchromatic gene	-0.153271	-0.0825925	-0.141253	25	0
A_09_P017801	euchromatic gene	-0.168777	0.0196451	-0.308377	17	0
A_09_P017806	euchromatic gene	-0.0757912	-0.0263425	-0.104374	10	0
A_09_P017811	euchromatic gene	-0.227478	0.0757539	0.0723273	31	0
A_09_P017816	euchromatic gene	-0.000310059	-0.0188887	-0.178937	28	0.3058
A_09_P017821	euchromatic gene	-0.470857	0.390148	0.238969	21	0
A_09_P017826	euchromatic gene	0.0233552	-0.117192	-0.208299	22	0
A_09_P017831	euchromatic gene	-0.119197	-0.0498904	-0.0957856	14	0
A_09_P017836	euchromatic gene	-0.323123	0.171557	0.096296	24	0
A_09_P017841	euchromatic gene	0.159179	-0.347393	-0.230793	15	0
A_09_P017846	euchromatic gene	-0.388199	0.202276	0.140661	20	0
A_09_P017851	euchromatic gene	-0.387423	0.176414	0.102978	12	0
A_09_P017856	euchromatic gene	-0.357881	0.0927491	0.116553	14	0.6116
A_09_P017861	euchromatic gene	-0.0599942	-0.103793	-0.26477	16	0
A_09_P017866	euchromatic gene	-0.291691	0.0792065	-0.0314624	9	0
A_09_P017871	euchromatic gene	0.0718857	-0.111726	-0.0270628	26	0
A_09_P017876	euchromatic gene	-0.313155	0.112402	0.136775	12	0.3058
A_09_P017881	euchromatic gene	-0.0630434	-0.143002	-0.183599	12	0
A_09_P017886	euchromatic gene	-0.254444	0.125425	-0.00285989	12	0
A_09_P017891	euchromatic gene	-0.106322	0.0473022	0.0212712	14	0
A_09_P017896	euchromatic gene	-0.373442	-0.00558635	0.178207	11	0
A_09_P017901	euchromatic gene	-0.185553	-0.0140957	0.0342286	38	0.3058
A_09_P017906	euchromatic gene	-0.48535	0.111188	0.0450565	13	0
A_09_P017911	euchromatic gene	-0.214247	0.0697974	-0.0464886	23	0
A_09_P017916	euchromatic gene	-0.0678903	-0.0445712	-0.0510375	20	0
A_09_P017921	euchromatic gene	-0.165157	0.0446798	-0.276672	23	0
A_09_P017926	euchromatic gene	-0.428339	0.274043	0.265189	25	0
A_09_P017931	euchromatic gene	-0.188349	-0.0250593	-0.0761723	15	0
A_09_P017936	euchromatic gene	-0.303066	0.200394	0.123986	18	0
A_09_P017941	euchromatic gene	-0.178746	0.038965	-0.0325508	18	0.3058
A_09_P017946	euchromatic gene	-0.284236	0.0316084	-0.000738686	15	0
A_09_P017951	euchromatic gene	-0.183471	-0.09183	-0.122953	24	0
A_09_P017966	euchromatic gene	-0.227752	0.207128	0.0688328	12	0
A_09_P017971	euchromatic gene	-0.231037	0.0209742	-0.0059063	22	0
A_09_P017976	euchromatic gene	-0.181261	-0.0364626	-0.0191581	17	0
A_09_P017981	euchromatic gene	-0.0800279	-0.131878	-0.0729453	23	0
A_09_P017986	euchromatic gene	0.164301	-0.0982747	-0.128418	20	0
A_09_P017991	euchromatic gene	-0.354937	0.277823	0.124964	11	0
A_09_P017996	euchromatic gene	-0.266891	-0.023846	0.0851883	12	0
A_09_P018001	euchromatic gene	-0.367392	0.165639	0.128723	23	0
A_09_P018006	euchromatic gene	-0.199686	-0.0518032	-0.122931	20	0
A_09_P018011	euchromatic gene	-0.14943	0.0405919	-0.109068	20	0
A_09_P018016	euchromatic gene	-0.152181	0.159802	-0.0512288	17	0
A_09_P018021	euchromatic gene	0.0650021	-0.12114	-0.210922	18	0
A_09_P018026	euchromatic gene	-0.220308	0.115828	-0.115453	16	0
A_09_P018031	euchromatic gene	-0.293808	0.10085	0.170419	20	0
A_09_P018036	euchromatic gene	-0.282358	0.174531	0.14224	25	0
A_09_P018041	euchromatic gene	0.0392778	-0.0419319	0.0917323	12	0
A_09_P018046	euchromatic gene	-0.124961	0.22639	0.172784	16	0.3058
A_09_P018051	euchromatic gene	-0.284846	-0.774709	-0.625382	18	0
A_09_P018056	euchromatic gene	-0.432308	0.176881	0.0888146	20	0.6116
A_09_P018061	euchromatic gene	-0.135946	0.0609386	0.232307	21	0
A_09_P018066	euchromatic gene	-0.555754	0.0238079	0.109433	30	0
A_09_P018071	euchromatic gene	-0.523054	-0.0214379	-0.0682959	27	0
A_09_P018076	euchromatic gene	-0.0198068	-0.340953	-0.184057	8	0.3058
A_09_P018081	euchromatic gene	-0.0425156	0.00793862	-0.151548	23	0
A_09_P018086	euchromatic gene	-0.203658	-0.100004	-0.0401624	28	0
A_09_P018091	euchromatic gene	-0.00960185	-0.507782	-0.266318	17	0
A_09_P018096	euchromatic gene	-0.284076	0.0615562	-0.0553209	22	0
A_09_P018101	euchromatic gene	-0.236374	0.0356949	-0.00407623	22	0
A_09_P018106	euchromatic gene	-0.143809	0.13846	0.00400494	14	0
A_09_P018111	euchromatic gene	-0.184683	0.0982432	-0.0815049	6	0
A_09_P018116	euchromatic gene	-0.245692	-0.00683461	0.133621	22	0
A_09_P018121	euchromatic gene	-0.232341	0.00394525	-0.167093	13	0.3058
A_09_P018126	euchromatic gene	-0.10648	-0.00893653	-0.14279	14	0
A_09_P018131	euchromatic gene	-0.0190188	-0.00817832	-0.124026	16	0
A_09_P018136	euchromatic gene	-0.240803	0.118011	0.0975622	20	0
A_09_P018141	euchromatic gene	-0.203533	-0.183812	-0.0464466	37	0
A_09_P018146	euchromatic gene	-0.262151	0.125799	-0.0453601	14	0
A_09_P018151	euchromatic gene	0.0165833	-0.112745	-0.0507857	17	0
A_09_P018156	euchromatic gene	-0.114146	0.129989	-0.103183	6	0
A_09_P018161	euchromatic gene	-0.264097	0.0644753	0.0440184	25	0.3058
A_09_P018166	euchromatic gene	-0.392526	0.116663	0.0916485	22	0
A_09_P018171	euchromatic gene	-0.171958	0.0869916	0.0507274	6	0
A_09_P018176	euchromatic gene	0.00125557	-0.0663464	0.00519033	17	0
A_09_P018181	euchromatic gene	-0.30452	0.122776	0.145331	21	0
A_09_P018186	euchromatic gene	-0.383886	0.209122	0.0655502	23	0
A_09_P018191	euchromatic gene	-0.335947	0.231822	0.418674	19	0
A_09_P018196	euchromatic gene	-0.168734	0.0206353	0.029108	17	0
A_09_P018201	euchromatic gene	-0.181714	-0.0524713	0.0334893	22	0
A_09_P018206	euchromatic gene	-0.241308	0.165695	0.188326	20	0
A_09_P018211	euchromatic gene	-0.311015	0.210193	0.214604	22	0
A_09_P018216	euchromatic gene	-0.19193	0.0980339	-0.0927742	20	0
A_09_P018221	euchromatic gene	0.135095	-0.22756	-0.34259	18	0
A_09_P018226	euchromatic gene	-0.159242	0.181647	0.0461337	24	0
A_09_P018231	euchromatic gene	-0.164293	0.11927	0.205558	12	0
A_09_P018236	euchromatic gene	-0.00858687	0.180683	-0.0237139	19	0
A_09_P018241	euchromatic gene	-0.199806	-0.0309674	-0.0967424	29	0
A_09_P018246	euchromatic gene	0.215862	-0.157767	-0.294689	7	0
A_09_P018251	euchromatic gene	-0.126336	-0.0553206	-0.277021	20	0
A_09_P018256	euchromatic gene	-0.0758382	-0.658294	-0.598208	14	0
A_09_P018261	euchromatic gene	-0.0639444	-0.548598	-0.539425	18	0
A_09_P018266	euchromatic gene	0.102848	-0.608713	-0.672614	27	0
A_09_P018271	euchromatic gene	-0.417021	-0.369024	-0.266186	21	0
A_09_P018276	euchromatic gene	-0.146503	-0.444294	-0.575218	21	0
A_09_P018281	euchromatic gene	-0.0502397	0.125748	0.00036843	18	0
A_09_P018286	euchromatic gene	-0.271568	0.118717	-0.0710674	8	0
A_09_P018291	euchromatic gene	-0.278594	0.129324	-0.00501657	19	0
A_09_P018296	euchromatic gene	-0.0608748	-0.00785176	0.0541365	17	0
A_09_P018306	euchromatic gene	-0.844194	0.347095	0.668749	17	0
A_09_P018311	euchromatic gene	-0.0850384	0.0970034	-0.0578446	23	0.3058
A_09_P018316	euchromatic gene	-0.351203	0.17403	0.0283733	22	0
A_09_P018326	euchromatic gene	-0.25627	0.238821	0.156892	10	0.917399
A_09_P018331	euchromatic gene	-0.0863454	0.0587437	0.12469	27	0
A_09_P018336	euchromatic gene	-0.552093	0.336713	0.191877	22	0.3058
A_09_P018341	euchromatic gene	-0.192177	0.148099	0.109553	24	0.6116
A_09_P018346	euchromatic gene	-0.204824	-0.0158472	-0.0472022	19	0
A_09_P018351	euchromatic gene	0.0394188	-0.159089	-0.173106	3	0.6116
A_09_P018356	euchromatic gene	0.111597	0.000607722	-0.252782	8	0
A_09_P018361	euchromatic gene	-0.24506	0.116609	0.191481	19	0.3058
A_09_P018366	euchromatic gene	-0.550824	-0.958117	-0.403981	21	0
A_09_P018371	euchromatic gene	-0.169362	-0.0365189	-0.0609971	28	0
A_09_P018376	euchromatic gene	-0.0441606	0.0129096	-0.182253	24	0
A_09_P018381	euchromatic gene	-0.147153	0.088084	-0.061051	22	0.3058
A_09_P018386	euchromatic gene	-0.242762	0.181751	0.128212	22	0
A_09_P018391	euchromatic gene	-0.301048	-0.0768749	0.0318633	15	0
A_09_P018401	euchromatic gene	-0.190043	0.108844	0.0407512	26	0
A_09_P018406	euchromatic gene	-0.0331863	0.142828	-0.0152188	13	0
A_09_P018411	euchromatic gene	-0.0699894	0.025712	-0.0955155	22	0
A_09_P018421	euchromatic gene	-0.219726	0.122385	0.148073	11	0
A_09_P018431	euchromatic gene	-0.189593	-0.0524779	-0.0841783	16	0
A_09_P018436	euchromatic gene	-0.62446	0.284759	0.157184	14	0
A_09_P018441	euchromatic gene	-0.251452	0.125184	-0.0161092	27	0
A_09_P018446	euchromatic gene	-0.264088	0.228388	0.056336	26	0
A_09_P018451	euchromatic gene	-0.0933407	-0.0960053	0.0662849	18	0
A_09_P018456	euchromatic gene	-0.175103	0.0979741	-0.0858163	16	0
A_09_P018461	euchromatic gene	-0.163788	0.02907	0.0602426	22	0
A_09_P018466	euchromatic gene	-0.187887	0.0309843	0.0342885	21	0
A_09_P018471	euchromatic gene	-0.266402	0.0863835	-0.00255424	31	0
A_09_P018476	euchromatic gene	-0.181552	0.117152	-0.0128441	10	0
A_09_P018481	euchromatic gene	-0.407124	0.180902	0.105361	10	0
A_09_P018486	euchromatic gene	-0.158082	0.116582	0.113593	18	0
A_09_P018491	euchromatic gene	-0.249091	0.223965	0.141078	23	0
A_09_P018496	euchromatic gene	-0.10919	0.255197	0.0842258	13	0
A_09_P018501	euchromatic gene	-0.321581	0.0518397	0.16514	22	0
A_09_P018506	euchromatic gene	-0.155143	0.337385	0.221804	17	0
A_09_P018511	euchromatic gene	-0.403606	0.264811	0.203602	22	0
A_09_P018516	euchromatic gene	-0.0787421	0.0257744	0.175788	20	0.3058
A_09_P018521	euchromatic gene	-0.115706	-0.0426165	-0.119253	21	0
A_09_P018526	euchromatic gene	-0.131593	0.0856821	-0.0909795	20	0
A_09_P018531	euchromatic gene	-0.337632	-0.00642678	0.0182819	23	0
A_09_P018536	euchromatic gene	-0.115009	0.25715	0.0145882	24	0
A_09_P018541	euchromatic gene	-0.444339	0.150697	-0.00476084	28	0
A_09_P018546	euchromatic gene	-0.21583	0.161161	0.00136346	15	0.6116
A_09_P018551	euchromatic gene	-0.285649	-0.0484117	-0.0877395	15	0
A_09_P018556	euchromatic gene	-0.603658	0.395378	0.188426	22	0
A_09_P018561	euchromatic gene	-0.363195	0.224734	0.278635	19	0
A_09_P018571	euchromatic gene	-0.442052	0.236408	0.203548	19	0
A_09_P018576	euchromatic gene	0.0771667	-0.270314	-0.272865	15	0
A_09_P018581	euchromatic gene	-0.0599863	0.121488	-0.0430466	26	0.917399
A_09_P018586	euchromatic gene	0.080032	-0.226945	-0.144179	19	0
A_09_P018591	euchromatic gene	-0.158775	-0.0138118	-0.0980176	24	0
A_09_P018596	euchromatic gene	-0.172393	-0.0928635	0.0410904	18	0
A_09_P018601	euchromatic gene	-0.207428	-0.055433	0.0124898	20	0
A_09_P018606	euchromatic gene	-0.220073	0.0582006	0.138324	9	0
A_09_P018611	euchromatic gene	-0.404047	0.0454329	0.0615042	18	0
A_09_P018616	euchromatic gene	-0.130379	-0.0652887	-0.0871915	12	0
A_09_P018621	euchromatic gene	-0.166712	-0.0325602	-0.0428866	23	0
A_09_P018626	euchromatic gene	-0.410229	-0.121198	0.217769	18	0
A_09_P018631	euchromatic gene	-0.104961	-0.164824	-0.136724	20	0
A_09_P018636	euchromatic gene	-0.135688	-0.118471	0.136463	14	0
A_09_P018641	euchromatic gene	-0.13765	-0.15692	0.0113198	17	0
A_09_P018646	euchromatic gene	-0.395835	-0.0705549	0.152174	17	0
A_09_P018651	euchromatic gene	-0.488203	0.307192	0.43201	18	0
A_09_P018656	euchromatic gene	-0.285927	0.154429	0.0707452	12	0
A_09_P018661	euchromatic gene	-0.301415	0.0593566	0.0888174	15	0.3058
A_09_P018666	euchromatic gene	-0.351877	0.139978	0.171197	25	0
A_09_P018671	euchromatic gene	-0.491057	0.275344	0.318831	9	0
A_09_P018676	euchromatic gene	-0.0237702	-0.0821376	-0.147994	12	0.3058
A_09_P018681	euchromatic gene	-0.390209	0.119664	0.192842	13	0
A_09_P018686	euchromatic gene	-0.141083	-0.0862844	-0.0340619	22	0.3058
A_09_P018691	euchromatic gene	-0.150048	-0.0342784	-0.0706809	27	0
A_09_P018696	euchromatic gene	-0.234059	0.00617441	-0.000101388	16	0
A_09_P018701	euchromatic gene	-0.0537676	-0.0915787	-0.305764	10	0
A_09_P018706	euchromatic gene	0.00161984	-0.0606085	-0.314589	23	0
A_09_P018711	euchromatic gene	-0.130175	0.179851	-0.0209271	15	0
A_09_P018716	euchromatic gene	-0.27349	0.166737	0.0452361	14	0
A_09_P018721	euchromatic gene	-0.262964	0.121662	0.0405895	19	0
A_09_P018726	euchromatic gene	-0.186828	0.20355	0.16535	19	0
A_09_P018731	euchromatic gene	0.064988	-0.239715	-0.127398	24	0
A_09_P018736	euchromatic gene	-0.419086	0.122968	0.165118	15	0
A_09_P018741	euchromatic gene	-0.113736	0.179689	0.0833016	17	0
A_09_P018746	euchromatic gene	-0.250798	0.0799808	-0.0352408	11	0
A_09_P018751	euchromatic gene	-0.54574	0.36812	0.288478	26	0
A_09_P018756	euchromatic gene	0.0149044	-0.0384214	-0.0181438	16	1.2232
A_09_P018761	euchromatic gene	-0.0190693	0.0127585	-0.0217425	2	0
A_09_P018766	euchromatic gene	-0.154608	-0.0490245	0.0241456	14	0
A_09_P018771	euchromatic gene	-0.40754	0.203639	0.056676	9	0
A_09_P018776	euchromatic gene	-0.228592	0.00654518	-0.186032	0	0
A_09_P018781	euchromatic gene	-0.14887	-0.0578753	-0.206141	14	0
A_09_P018786	euchromatic gene	-0.00429222	-0.267681	-0.193014	10	0
A_09_P018791	euchromatic gene	0.0125647	-3.51698	-1.72338	2	0
A_09_P018796	euchromatic gene	-0.205588	-0.000444477	0.0280309	19	0
A_09_P018801	euchromatic gene	-0.270166	0.0261883	-0.0868449	18	0
A_09_P018806	euchromatic gene	-0.201954	0.24962	0.0401514	18	0
A_09_P018811	euchromatic gene	-0.108299	0.0294487	-0.062062	24	0
A_09_P018816	euchromatic gene	-0.172856	0.0752307	-0.246902	18	0
A_09_P018821	euchromatic gene	-0.161372	0.0117969	-0.0282811	19	0.3058
A_09_P018826	euchromatic gene	-0.344373	0.175775	0.230013	41	0
A_09_P018831	euchromatic gene	-0.272051	0.104124	0.0673797	44	0
A_09_P018836	euchromatic gene	0.188866	-0.166809	-0.382031	26	0
A_09_P018841	euchromatic gene	-0.154088	0.0284447	0.0111975	20	0
A_09_P018846	euchromatic gene	-0.216862	0.033082	-0.0992733	19	0
A_09_P018851	euchromatic gene	-0.282015	0.218939	0.109605	17	0
A_09_P018856	euchromatic gene	0.0505908	-0.0779629	-0.298344	24	0
A_09_P018861	euchromatic gene	-0.0696469	-0.0207861	-0.0706276	25	0.6116
A_09_P018866	euchromatic gene	-0.0750369	0.0096157	-0.0937481	11	0.6116
A_09_P018871	euchromatic gene	-0.508014	0.221527	0.268503	16	0
A_09_P018876	euchromatic gene	-0.180188	0.133654	0.0325775	22	0
A_09_P018881	euchromatic gene	-0.272455	0.256279	0.130385	27	0
A_09_P018891	euchromatic gene	-0.243841	0.249971	0.0521021	31	0
A_09_P018896	euchromatic gene	-0.336978	0.299093	0.159018	19	0
A_09_P018901	euchromatic gene	-0.0462882	-0.00261125	-0.0922504	18	0.3058
A_09_P018906	euchromatic gene	-0.204106	-0.033444	0.022815	2	0.3058
A_09_P018911	euchromatic gene	0.0885442	-0.00705895	-0.263575	16	0
A_09_P018916	euchromatic gene	-0.287301	0.154973	0.0280291	24	0
A_09_P018921	euchromatic gene	-0.220731	0.169948	0.0797636	19	0
A_09_P018926	euchromatic gene	-0.253762	0.131659	-0.117715	15	0
A_09_P018931	euchromatic gene	-0.143462	-0.423141	-0.123264	13	0.6116
A_09_P018936	euchromatic gene	-0.0855163	0.046146	-0.00890899	27	0.3058
A_09_P018941	euchromatic gene	-0.276626	0.223055	0.229715	24	0
A_09_P018946	euchromatic gene	-0.260371	0.032448	-0.0607246	17	0
A_09_P018951	euchromatic gene	-0.506119	-0.482391	-0.591223	31	0
A_09_P018956	euchromatic gene	-0.103379	0.00254779	-0.0346721	20	0
A_09_P018961	euchromatic gene	-0.154438	0.0953076	-0.00723371	21	0
A_09_P018966	euchromatic gene	-0.173356	0.0375874	-0.00154275	0	0.3058
A_09_P018971	euchromatic gene	-0.159291	0.123199	-0.00238232	15	0
A_09_P018976	euchromatic gene	-0.00831228	-0.0807628	-0.226163	13	0
A_09_P018981	euchromatic gene	-0.120362	-0.02933	-0.0444242	19	0
A_09_P018986	euchromatic gene	-0.298107	0.257891	0.0279112	27	0
A_09_P018991	euchromatic gene	-0.404946	0.177929	-0.00657723	29	0
A_09_P018996	euchromatic gene	-0.361801	0.148805	0.0435523	25	0
A_09_P019001	euchromatic gene	-0.306652	0.192837	-0.0252381	8	0
A_09_P019006	euchromatic gene	-0.214084	-0.0885893	0.00393887	15	0
A_09_P019011	euchromatic gene	-0.654691	0.247812	0.718991	21	0
A_09_P019016	euchromatic gene	0.0736717	-0.0937403	-0.242379	14	0
A_09_P019021	euchromatic gene	-0.0603038	-0.085715	-0.0218446	14	0
A_09_P019026	euchromatic gene	-0.187947	0.0484755	0.0306009	24	0
A_09_P019031	euchromatic gene	-0.176006	0.100673	-0.016276	8	0
A_09_P019036	euchromatic gene	-0.11229	0.150353	0.0989359	25	0
A_09_P019041	euchromatic gene	-0.0720064	-0.205489	0.00587246	17	0
A_09_P019051	euchromatic gene	-0.461602	0.316939	0.181354	23	0
A_09_P019056	euchromatic gene	-0.262979	0.0707696	0.0833631	21	0
A_09_P019061	euchromatic gene	-0.114368	0.259814	0.174338	12	0
A_09_P019066	euchromatic gene	-0.164005	0.273772	0.120587	25	0
A_09_P019071	euchromatic gene	-0.291229	0.258346	0.116105	12	0
A_09_P019076	euchromatic gene	-0.20715	0.17289	0.053117	16	0
A_09_P019081	euchromatic gene	-0.0946552	-0.0520953	-0.147107	27	0
A_09_P019086	euchromatic gene	-0.336236	0.135642	0.143071	17	0
A_09_P019096	euchromatic gene	-0.257656	0.0948976	0.0154726	24	0
A_09_P019101	euchromatic gene	-0.255159	0.115414	-0.050948	26	0
A_09_P019106	euchromatic gene	-0.0220249	-0.0667983	-0.220895	11	0
A_09_P019111	euchromatic gene	-0.0298852	-0.121689	-0.0728506	27	0
A_09_P019116	euchromatic gene	-0.223158	-0.100092	0.124131	9	0
A_09_P019121	euchromatic gene	-0.150351	-0.28362	-0.077618	15	0
A_09_P019126	euchromatic gene	-0.212148	-0.250326	-0.0614035	21	0
A_09_P019131	euchromatic gene	-0.241318	0.295709	0.14011	12	0
A_09_P019136	euchromatic gene	-0.103481	0.0424036	-0.0189489	16	0.6116
A_09_P019141	euchromatic gene	-0.127912	0.0634231	0.102573	1	0
A_09_P019146	euchromatic gene	-0.140602	-0.00536708	-0.15916	24	0
A_09_P019151	euchromatic gene	-0.110685	-0.128835	-0.068227	22	0.3058
A_09_P019156	euchromatic gene	-0.0701278	-0.0329073	-0.126592	16	0
A_09_P019161	euchromatic gene	-0.268633	0.22155	0.0379847	13	0
A_09_P019166	euchromatic gene	-0.307739	0.284595	0.12975	24	0
A_09_P019171	euchromatic gene	-0.31139	0.193179	-0.00665854	20	0
A_09_P019176	euchromatic gene	-0.358234	0.0221321	0.0369521	18	0.3058
A_09_P019181	euchromatic gene	-0.391008	0.146015	0.15884	19	0
A_09_P019186	euchromatic gene	-0.0758568	-0.0473108	0.0321413	12	0
A_09_P019191	euchromatic gene	0.0884653	-0.115731	-0.00364715	12	0
A_09_P019196	euchromatic gene	-0.233784	0.106375	0.0203403	22	0
A_09_P019201	euchromatic gene	-0.249143	-0.0479871	-0.0349023	15	0
A_09_P019206	euchromatic gene	-0.13897	0.116031	-0.0940101	16	0
A_09_P019211	euchromatic gene	-0.266194	0.124093	-0.0346166	12	0
A_09_P019216	euchromatic gene	-0.146419	0.0117212	-0.126713	14	0
A_09_P019221	euchromatic gene	-0.428387	0.180977	0.023866	26	0
A_09_P019226	euchromatic gene	-0.441091	0.166482	0.0660471	21	0
A_09_P019231	euchromatic gene	-0.155105	-0.516308	-0.380028	17	0.6116
A_09_P019236	euchromatic gene	-0.00887883	-0.742475	-0.221912	17	0
A_09_P019241	euchromatic gene	-0.281702	-0.713853	-0.181152	18	0
A_09_P019246	euchromatic gene	-0.113854	-0.721412	-0.0850758	18	0
A_09_P019251	euchromatic gene	-0.054232	-1.05576	-0.437198	15	0
A_09_P019256	euchromatic gene	-0.416662	-0.943642	-0.149284	17	0
A_09_P019261	euchromatic gene	0.0428181	-1.0001	-0.403446	14	0
A_09_P019266	euchromatic gene	-0.180702	-0.666584	-0.03214	15	0
A_09_P019271	euchromatic gene	-0.143266	-0.352683	-0.0167075	13	0
A_09_P019276	euchromatic gene	-0.284014	-0.0375805	0.0529926	0	0.3058
A_09_P019281	euchromatic gene	-0.0860198	-0.0104704	-0.0740647	13	0
A_09_P019286	euchromatic gene	-0.225307	0.0815521	-0.0167727	13	0
A_09_P019291	euchromatic gene	-0.181717	-0.0190259	-0.0226088	16	0
A_09_P019296	euchromatic gene	-0.319487	0.0242906	0.0295023	12	0
A_09_P019301	euchromatic gene	-0.323242	0.131541	0.0432331	20	0.6116
A_09_P019311	euchromatic gene	-0.0910915	-0.11715	-0.0126765	22	0
A_09_P019316	euchromatic gene	-0.351639	0.0582941	-0.0753662	27	0
A_09_P019321	euchromatic gene	-0.244935	0.150905	0.148035	9	0.3058
A_09_P019326	euchromatic gene	-0.149047	0.130744	0.017192	18	0
A_09_P019331	euchromatic gene	-0.277907	0.181648	0.1085	19	0
A_09_P019336	euchromatic gene	-0.294096	0.0668171	0.0154869	29	0.3058
A_09_P019341	euchromatic gene	-0.0102785	-0.0995657	-0.155685	16	0
A_09_P019346	euchromatic gene	-0.233908	-0.0907633	-0.0901993	0	0
A_09_P019351	euchromatic gene	-0.363424	0.149612	0.0758929	19	0
A_09_P019356	euchromatic gene	-0.0893237	-0.0103777	-0.23521	13	0
A_09_P019361	euchromatic gene	-0.246145	0.0663745	-0.0532711	29	0
A_09_P019366	euchromatic gene	-0.252243	0.158297	-0.0351339	11	0
A_09_P019371	euchromatic gene	-0.246061	0.135053	0.0186387	32	0
A_09_P019376	euchromatic gene	-0.339003	0.0259504	0.0433377	24	0
A_09_P019381	euchromatic gene	-0.106506	0.0764567	-0.00498485	14	0
A_09_P019386	euchromatic gene	-0.341434	0.0654983	0.0799283	15	0
A_09_P019391	euchromatic gene	-0.353313	0.0993586	0.133124	14	0
A_09_P019396	euchromatic gene	-0.0320822	-0.156212	-0.242159	26	0
A_09_P019401	euchromatic gene	-0.03208	-0.0457776	-0.0475009	16	0
A_09_P019406	euchromatic gene	-0.0783898	0.0761926	0.00859379	14	0
A_09_P019411	euchromatic gene	-0.134089	-0.141228	-0.0791975	24	0
A_09_P019416	euchromatic gene	-0.0568522	0.0083957	0.0358853	32	0
A_09_P019421	euchromatic gene	-0.0633138	0.0453059	-0.00289919	17	0
A_09_P019426	euchromatic gene	-0.325989	0.122085	0.217648	18	0
A_09_P019431	euchromatic gene	-0.373044	0.126962	0.19042	17	0
A_09_P019436	euchromatic gene	-0.199489	-0.134594	-0.110257	20	0
A_09_P019441	euchromatic gene	-0.378082	0.0883556	0.146852	25	0
A_09_P019446	euchromatic gene	-0.129582	-0.112116	-0.0634072	19	0.3058
A_09_P019451	euchromatic gene	0.0189074	-0.0842684	-0.164247	23	0
A_09_P019456	euchromatic gene	-0.443474	0.239858	0.19264	18	0
A_09_P019461	euchromatic gene	-0.238492	-0.141259	0.0567321	23	0
A_09_P019466	euchromatic gene	-0.315043	-0.0227746	-0.263654	16	0
A_09_P019471	euchromatic gene	-0.0607816	0.0481437	-0.196137	16	0
A_09_P019476	euchromatic gene	-0.0617645	-0.0146369	-0.0263861	21	0
A_09_P019481	euchromatic gene	-0.394776	0.0439783	0.119553	26	0
A_09_P019486	euchromatic gene	-0.48234	0.274896	0.206207	14	0
A_09_P019491	euchromatic gene	0.022614	-0.161442	-0.276217	16	0
A_09_P019496	euchromatic gene	-0.129087	0.0645681	-0.0753649	29	0
A_09_P019501	euchromatic gene	0.206694	-0.185348	-0.207431	39	0
A_09_P019506	euchromatic gene	-0.153194	-0.0327979	-0.1865	37	0
A_09_P019511	euchromatic gene	-0.0183195	0.0717095	-0.133255	25	0
A_09_P019516	euchromatic gene	-0.331712	0.0748695	-0.0260131	6	0
A_09_P019521	euchromatic gene	0.0278763	-0.0549673	-0.109953	17	0
A_09_P019526	euchromatic gene	-0.324959	0.254249	0.0831795	25	0
A_09_P019531	euchromatic gene	-0.0441356	-0.021706	-0.109496	0	0
A_09_P019536	euchromatic gene	-0.164866	0.0683685	-0.224258	8	0
A_09_P019541	euchromatic gene	-0.0771808	0.0151015	-0.0271429	15	0.917399
A_09_P019546	euchromatic gene	-0.174246	0.104404	-0.121629	15	0
A_09_P019551	euchromatic gene	-0.246888	-0.353499	-0.332044	17	0
A_09_P019556	euchromatic gene	-0.144954	-0.0413846	-0.161193	7	0
A_09_P019561	euchromatic gene	-0.0409647	-0.0823688	-0.209039	0	0
A_09_P019566	euchromatic gene	-0.0536117	-0.066605	-0.137653	14	0.3058
A_09_P019571	euchromatic gene	-0.310658	-0.121246	0.0866062	18	0
A_09_P019576	euchromatic gene	-0.273047	-0.338487	-0.0904328	20	0.6116
A_09_P019581	euchromatic gene	-0.413531	-0.276278	-0.0980288	8	0
A_09_P019586	euchromatic gene	-0.18364	-0.055233	0.0506669	15	0
A_09_P019591	euchromatic gene	-0.0313293	-0.136674	-0.0658217	13	0.3058
A_09_P019596	euchromatic gene	-0.0624445	-0.215691	-0.127554	19	0
A_09_P019601	euchromatic gene	-0.198381	0.0442222	-0.07701	32	0
A_09_P019606	euchromatic gene	0.0217267	-0.137119	-0.201413	11	0
A_09_P019611	euchromatic gene	-0.215856	0.00594116	-0.0709691	20	0
A_09_P019616	euchromatic gene	-0.300907	-0.0885278	-0.0257981	25	0
A_09_P019621	euchromatic gene	-0.233064	-0.198753	-0.0929907	10	0
A_09_P019626	euchromatic gene	-0.140465	-0.274534	-0.15435	20	0
A_09_P019631	euchromatic gene	-0.0415451	-0.144623	-0.0618773	19	0
A_09_P019636	euchromatic gene	-0.103144	-0.189803	0.0297474	25	0
A_09_P019641	euchromatic gene	-0.407141	-0.0477271	0.161108	11	0
A_09_P019646	euchromatic gene	-0.106863	-0.357783	-0.0775084	15	0
A_09_P019651	euchromatic gene	-0.26501	-0.102011	0.0611752	27	0
A_09_P019656	euchromatic gene	0.130957	-0.290797	-0.058672	13	0
A_09_P019666	euchromatic gene	-0.165391	-0.0831285	-0.105446	25	0
A_09_P019671	euchromatic gene	-0.23198	0.154866	-0.100893	14	0
A_09_P019676	euchromatic gene	-0.52662	0.202711	0.309096	25	0
A_09_P019681	euchromatic gene	-0.225554	0.161706	0.0635773	18	0
A_09_P019686	euchromatic gene	-0.531387	-0.00137241	-0.0314149	19	0
A_09_P019691	euchromatic gene	-0.191894	0.080021	0.0895424	15	0
A_09_P019696	euchromatic gene	-0.0673868	0.070481	-0.133549	16	1.2232
A_09_P019706	euchromatic gene	-0.219187	-0.0148706	-0.0694643	17	0
A_09_P019711	euchromatic gene	-0.306726	0.160549	0.148589	12	0
A_09_P019716	euchromatic gene	-0.266425	0.10137	0.00430085	16	0
A_09_P019721	euchromatic gene	-0.0995356	-0.0208131	0.093264	26	0
A_09_P019726	euchromatic gene	-0.087729	0.00443522	-0.131616	24	0
A_09_P019731	euchromatic gene	-0.742334	0.0134459	0.147998	9	0
A_09_P019736	euchromatic gene	-0.194519	-0.0467981	0.0323134	18	0
A_09_P019741	euchromatic gene	-0.276656	0.233855	0.12928	24	0
A_09_P019746	euchromatic gene	-0.120381	-0.102118	-0.038166	13	0
A_09_P019751	euchromatic gene	-0.249102	-0.155404	0.0153504	15	0
A_09_P019756	euchromatic gene	-0.243038	0.150224	0.163494	18	0
A_09_P019761	euchromatic gene	-0.193556	-0.0804858	0.0686254	24	0
A_09_P019766	euchromatic gene	-0.240155	-0.0135936	0.0364958	22	0.6116
A_09_P019771	euchromatic gene	-0.184369	-0.1128	-0.0765792	25	0
A_09_P019776	euchromatic gene	-0.125341	0.0568409	-0.0216692	16	0
A_09_P019781	euchromatic gene	-0.130858	-0.163611	0.0996582	17	0
A_09_P019786	euchromatic gene	-0.225981	0.182093	-0.0564556	15	0
A_09_P019796	euchromatic gene	-0.459427	0.176097	0.327707	22	0
A_09_P019801	euchromatic gene	-0.108547	0.0521119	-0.113816	3	0
A_09_P019806	euchromatic gene	-0.130638	0.00384131	-0.0824728	27	0
A_09_P019811	euchromatic gene	-0.0576604	-0.0761913	-0.115191	22	0
A_09_P019816	euchromatic gene	-0.45793	0.266655	0.202575	23	0.3058
A_09_P019821	euchromatic gene	-0.173821	0.0723444	-0.0640287	18	0
A_09_P019826	euchromatic gene	-0.265439	0.0950875	0.133188	12	0
A_09_P019831	euchromatic gene	-0.323713	0.161887	0.0971421	34	0
A_09_P019836	euchromatic gene	-0.0195263	-0.0010995	-0.0456651	23	0.917399
A_09_P019841	euchromatic gene	-0.201072	0.096851	-0.0668401	27	0
A_09_P019846	euchromatic gene	-0.329639	-0.0129021	-0.0144079	15	0
A_09_P019851	euchromatic gene	0.027117	0.0648104	-0.0473398	20	0
A_09_P019856	euchromatic gene	-0.192644	0.122726	0.142557	18	0
A_09_P019861	euchromatic gene	-0.402992	0.225662	0.157982	21	0
A_09_P019866	euchromatic gene	-0.257723	-0.117814	-0.214816	13	0
A_09_P019871	euchromatic gene	-0.324351	0.14869	0.125254	21	0.3058
A_09_P019876	euchromatic gene	-0.397666	0.176987	0.140378	23	0
A_09_P019881	euchromatic gene	-0.157781	0.0488678	-0.0933602	11	0
A_09_P019886	euchromatic gene	-0.129497	-0.0901084	-0.0485534	18	0
A_09_P019891	euchromatic gene	-0.214229	0.00182064	0.00977302	17	0
A_09_P019896	euchromatic gene	-0.0831767	-0.396311	-0.091151	24	0.3058
A_09_P019901	euchromatic gene	-0.0840092	-0.960059	-0.177445	15	0
A_09_P019906	euchromatic gene	-0.30687	-0.671958	0.0163253	20	0.3058
A_09_P019911	euchromatic gene	0.127839	-0.351405	-0.191825	30	0
A_09_P019916	euchromatic gene	-0.237523	-0.0356132	-0.049796	26	0
A_09_P019921	euchromatic gene	-0.391384	0.0276938	0.0383058	15	0
A_09_P019926	euchromatic gene	-0.0126303	-0.0964374	-0.176031	24	0
A_09_P019931	euchromatic gene	0.0545009	-0.0864233	-0.221377	19	0
A_09_P019936	euchromatic gene	-0.204271	-0.721824	-0.742559	11	0.3058
A_09_P019941	euchromatic gene	-0.0519917	-0.0579114	-0.0768671	2	0
A_09_P019946	euchromatic gene	-0.204817	-0.0597981	-0.0495381	17	0
A_09_P019951	euchromatic gene	-0.31184	0.0320825	0.125	25	0
A_09_P019956	euchromatic gene	0.0454394	-0.285914	-0.213078	19	0
A_09_P019961	euchromatic gene	-0.244429	0.037324	0.14065	26	0
A_09_P019966	euchromatic gene	-0.316606	0.0808289	0.0260345	17	0
A_09_P019971	euchromatic gene	-0.302255	0.0514014	-0.0341142	23	0
A_09_P019976	euchromatic gene	0.0596693	0.0326265	-0.270127	16	0
A_09_P019986	euchromatic gene	-0.0809426	0.0645138	-0.103086	24	0
A_09_P019991	euchromatic gene	-0.0948041	-0.171551	-0.123859	13	0
A_09_P019996	euchromatic gene	-0.266391	-0.870138	-0.370483	26	0
A_09_P020001	euchromatic gene	-0.0395784	-0.0140394	-0.0320151	15	0
A_09_P020006	euchromatic gene	-0.0664635	-0.0248206	-0.168516	19	0
A_09_P020011	euchromatic gene	-0.529992	0.147666	0.364644	18	0
A_09_P020016	euchromatic gene	-0.290121	0.0583581	0.0226172	32	0.6116
A_09_P020026	euchromatic gene	-0.357235	0.377082	0.26216	25	0
A_09_P020031	euchromatic gene	-0.22172	-0.00399492	-0.0725697	21	0
A_09_P020041	euchromatic gene	-0.210364	0.0148382	0.0539079	14	0
A_09_P020046	euchromatic gene	-0.221211	0.100647	-0.0310745	28	0
A_09_P020051	euchromatic gene	-0.301675	0.128683	0.0475983	35	0
A_09_P020056	euchromatic gene	-0.16893	-0.0687683	-0.0430871	23	0.3058
A_09_P020061	euchromatic gene	-0.307499	0.224983	0.046899	18	0
A_09_P020066	euchromatic gene	-0.232582	0.197323	-0.0884536	13	0
A_09_P020071	euchromatic gene	-0.0748555	-0.0516372	-0.168423	18	0
A_09_P020076	euchromatic gene	-0.364787	0.0699132	-0.053895	11	0
A_09_P020081	euchromatic gene	-0.126922	0.0122134	-0.177034	1	0
A_09_P020086	euchromatic gene	0.0926666	-0.111542	-0.251892	17	0
A_09_P020091	euchromatic gene	-0.531033	0.24837	0.124451	15	0
A_09_P020096	euchromatic gene	-0.219999	-0.0330863	-0.0193142	21	0
A_09_P020101	euchromatic gene	-0.122048	0.0624793	-0.00144011	24	0
A_09_P020106	euchromatic gene	-0.0124101	-0.088832	-0.212741	17	0
A_09_P020111	euchromatic gene	-0.33863	0.201617	-0.0364383	17	0
A_09_P020116	euchromatic gene	-0.137424	0.0582161	-0.0249231	10	0
A_09_P020121	euchromatic gene	-0.265196	0.183739	0.202362	15	0.6116
A_09_P020126	euchromatic gene	-0.0791246	0.080013	-0.157504	17	0
A_09_P020131	euchromatic gene	-0.261623	-0.0529377	-0.0161706	13	0
A_09_P020136	euchromatic gene	0.0342817	-0.0460075	-0.0468156	0	0.3058
A_09_P020141	euchromatic gene	-0.0365047	0.0469229	-0.214774	26	0
A_09_P020146	euchromatic gene	-0.324489	0.204228	0.107176	24	0
A_09_P020151	euchromatic gene	-0.177812	0.062256	-0.0740374	1	0
A_09_P020156	euchromatic gene	-0.0834065	-0.0597209	-0.0456478	7	0.6116
A_09_P020161	euchromatic gene	-0.114846	0.0462453	-0.0689434	22	0
A_09_P020166	euchromatic gene	-0.414666	0.0602151	0.199933	22	0
A_09_P020171	euchromatic gene	-0.114378	-0.0253852	-0.350603	18	0.917399
A_09_P020181	euchromatic gene	-0.485529	0.171374	0.0804476	19	0
A_09_P020186	euchromatic gene	-0.121802	0.125571	-0.256849	10	0
A_09_P020191	euchromatic gene	-0.0151134	0.0415368	-0.126155	17	0
A_09_P020196	euchromatic gene	-0.222826	0.120205	0.0390481	15	0
A_09_P020201	euchromatic gene	0.393115	-0.285542	-0.412142	13	0
A_09_P020206	euchromatic gene	-0.259965	0.0876612	0.0457307	20	0
A_09_P020211	euchromatic gene	0.132452	-0.277855	-0.19376	28	0.3058
A_09_P020216	euchromatic gene	-0.205513	0.177045	0.220537	23	0
A_09_P020221	euchromatic gene	-0.165589	0.00152315	0.178018	25	0
A_09_P020226	euchromatic gene	-0.0879076	0.0809147	-0.139872	18	0
A_09_P020231	euchromatic gene	-0.54538	0.289849	0.274555	10	0
A_09_P020236	euchromatic gene	-0.285405	0.240642	0.132618	15	0
A_09_P020241	euchromatic gene	-0.459293	-0.00284761	0.00900985	21	0
A_09_P020246	euchromatic gene	-0.184943	-0.077569	-0.0985934	22	0.3058
A_09_P020251	euchromatic gene	-0.21786	0.06381	-0.0910917	19	0
A_09_P020256	euchromatic gene	-0.161659	0.11844	-0.0793588	21	0
A_09_P020261	euchromatic gene	-0.247773	0.190859	0.00456479	16	0
A_09_P020266	euchromatic gene	-0.330261	0.128751	0.14413	15	0
A_09_P020271	euchromatic gene	-0.182938	0.14274	-0.0189774	15	0
A_09_P020276	euchromatic gene	-0.330664	0.10552	0.0039319	11	0
A_09_P020281	euchromatic gene	-0.128397	-0.245323	-0.1153	8	0.3058
A_09_P020286	euchromatic gene	0.0158462	0.0165859	-0.256105	24	0
A_09_P020296	euchromatic gene	-0.320372	0.182202	0.0618554	6	0
A_09_P020301	euchromatic gene	-0.221327	-0.0234037	0.0121052	14	0
A_09_P020306	euchromatic gene	-0.471625	0.0581049	0.225269	1	0.3058
A_09_P020311	euchromatic gene	-0.457083	0.21856	0.259567	34	0
A_09_P020316	euchromatic gene	-0.0403251	-0.0495194	-0.00953163	13	0
A_09_P020321	euchromatic gene	-0.0542415	0.119365	-0.0524115	26	0.6116
A_09_P020326	euchromatic gene	-0.28526	0.230302	0.0299135	21	0
A_09_P020331	euchromatic gene	-0.187028	-0.449076	-0.133629	20	0
A_09_P020336	euchromatic gene	-0.121027	0.0395649	-0.0151263	20	0
A_09_P020341	euchromatic gene	-0.0881709	-0.0529078	-0.219648	19	0
A_09_P020346	euchromatic gene	-0.374452	0.0239006	0.0740932	23	0
A_09_P020351	euchromatic gene	-0.339987	0.234731	0.023289	18	0
A_09_P020356	euchromatic gene	-0.338415	0.308506	0.175294	22	0
A_09_P020361	euchromatic gene	-0.0480419	-0.0255925	-0.00487531	17	0
A_09_P020366	euchromatic gene	-0.240286	0.163018	0.0800108	23	0
A_09_P020371	euchromatic gene	-0.157291	0.129556	0.244629	18	0
A_09_P020376	euchromatic gene	-0.107036	0.0855697	-0.0613941	13	0
A_09_P020381	euchromatic gene	-0.274627	0.308889	0.0835193	20	0
A_09_P020386	euchromatic gene	-0.212041	0.223769	0.0578239	13	0
A_09_P020396	euchromatic gene	0.00395506	-0.258093	-0.0561848	22	0
A_09_P020401	euchromatic gene	-0.167446	0.0578025	-0.0451282	9	0
A_09_P020406	euchromatic gene	-0.213529	-0.0444295	-0.0954046	12	0
A_09_P020411	euchromatic gene	-0.229887	0.0560245	0.0642444	28	0
A_09_P020416	euchromatic gene	0.0652176	0.175604	-0.142854	1	0
A_09_P020421	euchromatic gene	-0.0610298	0.177297	-0.0531724	16	0
A_09_P020426	euchromatic gene	-0.0302351	0.069043	-0.167753	9	0
A_09_P020431	euchromatic gene	-0.0811937	0.170946	-0.00943309	17	0
A_09_P020436	euchromatic gene	-0.175983	0.143891	-0.0516766	1	0
A_09_P020441	euchromatic gene	-0.357592	0.310456	0.25384	26	0
A_09_P020446	euchromatic gene	-0.0717575	-0.0237978	0.174907	18	0.3058
A_09_P020451	euchromatic gene	-0.232676	0.129279	0.0273407	16	0
A_09_P020456	euchromatic gene	-0.4192	0.114599	0.189251	18	0.3058
A_09_P020461	euchromatic gene	-0.290042	0.0487094	0.0827478	12	0
A_09_P020466	euchromatic gene	0.107147	-0.156723	-0.272731	18	0.3058
A_09_P020471	euchromatic gene	-0.442042	0.240378	0.305894	21	0
A_09_P020476	euchromatic gene	-0.112451	0.063001	-0.148566	17	0
A_09_P020481	euchromatic gene	-0.237508	0.0972246	0.0897986	8	0
A_09_P020486	euchromatic gene	-0.0867999	-0.0472383	-0.225994	14	0
A_09_P020491	euchromatic gene	-0.380507	-1.37975	-1.12627	19	0
A_09_P020496	euchromatic gene	-0.420772	0.204005	-0.00729256	19	0
A_09_P020501	euchromatic gene	-0.195563	0.00840492	-0.0181933	22	0
A_09_P020506	euchromatic gene	-0.275694	0.0790436	0.011724	22	0
A_09_P020511	euchromatic gene	-0.310743	0.217535	0.00656655	10	0.3058
A_09_P020516	euchromatic gene	-0.304534	0.109078	0.143892	25	0
A_09_P020521	euchromatic gene	-0.199195	0.0406484	-0.206682	25	0
A_09_P020526	euchromatic gene	-0.189519	0.197468	-0.0297613	22	0
A_09_P020531	euchromatic gene	-0.426237	0.150717	0.213519	33	0.3058
A_09_P020536	euchromatic gene	-0.473677	0.226864	0.234796	18	0.3058
A_09_P020541	euchromatic gene	-0.114862	-0.124268	-0.123901	10	0
A_09_P020546	euchromatic gene	-0.378935	0.11941	0.081548	20	0
A_09_P020551	euchromatic gene	-0.10392	0.0567102	-0.0852688	16	0
A_09_P020556	euchromatic gene	-0.302171	0.0408122	-0.0349976	23	0
A_09_P020561	euchromatic gene	-0.277025	0.0909932	-0.0205342	14	0.3058
A_09_P020566	euchromatic gene	-0.569727	0.482698	0.556933	14	0
A_09_P020571	euchromatic gene	-0.0285858	-0.180623	-0.0849411	21	0
A_09_P020576	euchromatic gene	-0.13324	0.00440249	-0.0489999	10	0
A_09_P020581	euchromatic gene	-0.154093	-0.0495508	-0.0765555	4	0
A_09_P020586	euchromatic gene	-0.114411	0.0787048	-0.119382	28	0
A_09_P020591	euchromatic gene	-0.251762	0.0876765	0.0297427	23	0
A_09_P020596	euchromatic gene	-0.109997	-0.0416875	-0.177492	25	0.6116
A_09_P020601	euchromatic gene	-0.446214	0.200868	0.349266	14	0
A_09_P020606	euchromatic gene	-0.16736	-0.0754564	-0.141784	18	0
A_09_P020611	euchromatic gene	-0.196028	-0.443653	-0.225471	24	0
A_09_P020616	euchromatic gene	-0.303427	0.139514	-0.00260086	22	0.3058
A_09_P020621	euchromatic gene	0.0152344	0.00422097	-0.0126797	11	0
A_09_P020626	euchromatic gene	-0.240571	0.125675	0.0388874	18	0
A_09_P020631	euchromatic gene	-0.37533	0.146729	0.212695	27	0
A_09_P020636	euchromatic gene	-0.207407	0.198238	0.189397	27	0
A_09_P020641	euchromatic gene	0.0134472	-0.0913568	-0.00893295	20	0
A_09_P020646	euchromatic gene	-0.238112	0.131355	-0.0333911	26	0
A_09_P020651	euchromatic gene	-0.107018	0.111852	-0.019353	16	0
A_09_P020656	euchromatic gene	-0.20819	-0.0316003	0.0057182	12	0.6116
A_09_P020661	euchromatic gene	-0.298886	0.0910155	-0.0899649	31	0
A_09_P020666	euchromatic gene	-0.41722	0.169829	0.147129	21	0
A_09_P020671	euchromatic gene	-0.401394	0.134987	-0.0377378	17	0
A_09_P020676	euchromatic gene	-0.291214	0.125261	0.160166	17	0
A_09_P020681	euchromatic gene	-0.419489	0.251129	0.168219	14	0
A_09_P020686	euchromatic gene	-0.127396	0.0206911	-0.269502	10	0
A_09_P020691	euchromatic gene	-0.0921929	0.0469368	-0.111799	14	0
A_09_P020696	euchromatic gene	-0.207481	0.0421343	0.0652462	21	0
A_09_P020701	euchromatic gene	-0.313203	0.200208	-0.0313669	32	0
A_09_P020706	euchromatic gene	-0.39315	0.165636	-0.0620063	13	0
A_09_P020711	euchromatic gene	-0.46646	0.182065	0.140064	23	0
A_09_P020716	euchromatic gene	-0.278005	-0.016504	0.131628	15	0
A_09_P020721	euchromatic gene	-0.362267	-0.231655	-0.260098	27	0
A_09_P020731	euchromatic gene	-0.424752	0.315176	0.0919511	12	0
A_09_P020736	euchromatic gene	-0.402894	0.12317	-0.103431	20	0.3058
A_09_P020741	euchromatic gene	-0.26626	-0.0772211	-0.00527156	19	0
A_09_P020746	euchromatic gene	-0.472188	0.334871	0.202314	21	0
A_09_P020751	euchromatic gene	-0.438125	0.199965	0.0888975	24	0.3058
A_09_P020756	euchromatic gene	-0.0582081	-0.127958	-0.15187	31	0.3058
A_09_P020761	euchromatic gene	-0.19023	0.125151	0.0261527	16	0.3058
A_09_P020766	euchromatic gene	-0.14228	0.179426	-0.0222127	14	0
A_09_P020771	euchromatic gene	0.121322	-0.204095	-0.274321	22	0
A_09_P020776	euchromatic gene	-0.375428	0.309726	0.172363	27	0
A_09_P020781	euchromatic gene	-0.160855	0.202426	0.147293	15	0
A_09_P020786	euchromatic gene	-0.246982	0.213147	-0.0940682	16	0
A_09_P020791	euchromatic gene	-0.135634	-0.0637652	-0.038954	17	0
A_09_P020796	euchromatic gene	-0.171936	-0.0282839	-0.0231354	14	0
A_09_P020801	euchromatic gene	-0.121955	0.0590123	-0.0239664	8	0
A_09_P020806	euchromatic gene	-0.360991	0.224683	0.0513103	16	0
A_09_P020811	euchromatic gene	-0.071573	0.0798643	-0.104403	17	0.3058
A_09_P020816	euchromatic gene	-0.0376302	0.0413505	-0.00354288	19	0.3058
A_09_P020821	euchromatic gene	-0.138845	-0.0875583	-0.270633	0	0.6116
A_09_P020826	euchromatic gene	-0.479005	0.116364	0.124325	24	0
A_09_P020831	euchromatic gene	-0.178753	0.142235	0.149579	13	0
A_09_P020836	euchromatic gene	-0.479287	0.100383	0.14538	24	0
A_09_P020841	euchromatic gene	-0.131223	-0.0705415	-0.0586406	0	0
A_09_P020846	euchromatic gene	-0.169663	-0.0868623	-0.107813	14	0
A_09_P020851	euchromatic gene	-0.31026	0.11862	0.0515268	12	0
A_09_P020856	euchromatic gene	-0.0615122	-0.187796	0.0251937	20	0.6116
A_09_P020861	euchromatic gene	-0.00923758	-0.0957618	-0.320764	31	0
A_09_P020866	euchromatic gene	0.0582121	-0.0648154	-0.0743225	21	0
A_09_P020871	euchromatic gene	-0.278888	0.271049	0.0245299	12	0
A_09_P020876	euchromatic gene	-0.187273	0.149083	-0.0663061	13	0
A_09_P020881	euchromatic gene	-0.274993	-0.0241236	-0.184625	25	0
A_09_P020886	euchromatic gene	-0.0449238	-0.0851875	-0.0335826	22	0
A_09_P020891	euchromatic gene	0.334527	-0.532669	-0.364209	26	0.3058
A_09_P020896	euchromatic gene	-0.286327	0.224023	0.124654	21	0
A_09_P020901	euchromatic gene	-0.103854	-0.0499238	-0.103239	23	0
A_09_P020906	euchromatic gene	-0.379432	0.152085	0.0187273	20	0
A_09_P020911	euchromatic gene	-0.215407	0.243773	0.106933	23	0
A_09_P020916	euchromatic gene	-0.2783	0.208637	0.191449	11	0
A_09_P020921	euchromatic gene	-0.291742	0.0426455	0.00161776	17	0
A_09_P020926	euchromatic gene	-0.327973	0.298378	0.122216	23	0
A_09_P020931	euchromatic gene	-0.189147	0.0495319	0.0802443	17	0.917399
A_09_P020936	euchromatic gene	-0.178427	0.126854	0.0124887	9	0
A_09_P020941	euchromatic gene	-0.249492	-0.0338131	-0.067074	21	0
A_09_P020946	euchromatic gene	-0.134566	0.103988	-0.0868197	21	0.6116
A_09_P020951	euchromatic gene	-0.0341343	0.0340108	-0.149845	15	0
A_09_P020956	euchromatic gene	0.0652416	-0.105013	-0.198483	28	0
A_09_P020961	euchromatic gene	-0.165786	0.0731865	-0.0903628	11	0
A_09_P020966	euchromatic gene	-0.232247	-0.0155082	-0.282818	0	0
A_09_P020971	euchromatic gene	-0.19834	0.267438	-0.0432533	14	0
A_09_P020976	euchromatic gene	-0.330079	0.353344	0.175395	21	0
A_09_P020981	euchromatic gene	-0.144852	-0.223822	-0.301693	34	0
A_09_P020986	euchromatic gene	-0.181435	0.163212	0.00553743	25	0
A_09_P020991	euchromatic gene	-0.284543	0.219691	0.097659	15	0
A_09_P020996	euchromatic gene	0.0556467	-0.0902141	-0.268162	14	0
A_09_P021001	euchromatic gene	-0.146035	0.221224	0.142048	18	0
A_09_P021006	euchromatic gene	-0.21652	0.101107	0.0435644	22	0
A_09_P021011	euchromatic gene	-0.14836	-0.189569	-0.115227	0	0
A_09_P021016	euchromatic gene	-0.25732	0.126043	0.0757136	18	0
A_09_P021021	euchromatic gene	-0.378961	0.2328	0.209486	20	0.6116
A_09_P021026	euchromatic gene	-0.148883	0.136596	-0.00036488	2	0
A_09_P021031	euchromatic gene	0.041125	0.0115741	-0.0386662	20	0
A_09_P021036	euchromatic gene	-0.166134	0.100083	0.015595	9	0
A_09_P021041	euchromatic gene	-0.168879	0.0102519	0.168326	17	0
A_09_P021046	euchromatic gene	-0.44771	0.217398	0.456208	13	0
A_09_P021051	euchromatic gene	-0.0493778	-0.19045	-0.0632328	4	0
A_09_P021056	euchromatic gene	-0.238025	0.0078241	-0.159442	30	0.3058
A_09_P021061	euchromatic gene	-0.211964	0.139629	0.0701437	16	0
A_09_P021066	euchromatic gene	-0.258505	0.226015	0.164318	14	0
A_09_P021071	euchromatic gene	-0.150683	0.127704	0.0905092	2	0
A_09_P021076	euchromatic gene	-0.0826108	0.125544	-0.11756	12	0
A_09_P021086	euchromatic gene	-0.314509	0.276929	0.229072	21	0
A_09_P021091	euchromatic gene	-0.200365	0.138052	0.0847413	13	0
A_09_P021096	euchromatic gene	-0.0975832	0.141043	0.238638	32	0
A_09_P021101	euchromatic gene	-0.0793635	0.0945556	-0.305769	19	0
A_09_P021106	euchromatic gene	-0.0339079	-0.00753109	-0.144869	30	0
A_09_P021111	euchromatic gene	0.113335	-0.0438584	-0.162904	16	0
A_09_P021116	euchromatic gene	-0.0322896	0.0905632	0.226951	25	0
A_09_P021121	euchromatic gene	-0.356283	-0.565071	-0.12603	14	0
A_09_P021126	euchromatic gene	-0.216747	0.060341	0.491872	20	0
A_09_P021131	euchromatic gene	0.0278172	-0.0525317	0.47608	20	0
A_09_P021136	euchromatic gene	-0.138602	-0.0590299	0.54832	16	0
A_09_P021141	euchromatic gene	-0.28677	0.0990884	0.605274	21	0
A_09_P021146	euchromatic gene	-0.109122	0.0823071	0.659745	25	0
A_09_P021151	euchromatic gene	-0.0389267	0.091798	0.341268	15	0
A_09_P021156	euchromatic gene	-0.201062	0.12127	0.31158	17	0
A_09_P021166	euchromatic gene	-0.0712723	-0.0450528	-0.14152	27	0
A_09_P021171	euchromatic gene	-0.24366	0.143491	-0.048825	30	0.3058
A_09_P021176	euchromatic gene	0.0996698	0.0405789	0.0226312	22	0
A_09_P021181	euchromatic gene	-0.121179	0.00366667	0.0349571	10	0
A_09_P021186	euchromatic gene	0.185486	-0.0174854	-0.16213	21	0
A_09_P021191	euchromatic gene	-0.288078	0.184587	0.190366	16	0
A_09_P021196	euchromatic gene	-0.407276	0.265703	0.183881	26	0
A_09_P021201	euchromatic gene	-0.132248	0.0478737	0.0127178	4	0
A_09_P021206	euchromatic gene	-0.199833	-0.024487	-0.0870966	15	0
A_09_P021211	euchromatic gene	0.0227789	-0.159542	-0.0787758	24	0
A_09_P021216	euchromatic gene	-0.310296	0.160739	0.0369358	11	0.6116
A_09_P021221	euchromatic gene	-0.0614063	0.0583474	0.102303	25	0
A_09_P021226	euchromatic gene	0.330115	-0.172397	-0.144615	21	0
A_09_P021231	euchromatic gene	0.327564	-0.277928	-0.415336	18	0
A_09_P021236	euchromatic gene	-0.165296	0.0835019	-0.209761	13	0
A_09_P021241	euchromatic gene	-0.280899	0.168987	-0.0781011	9	0
A_09_P021246	euchromatic gene	-0.413386	0.185868	0.119024	9	0
A_09_P021251	euchromatic gene	-0.331667	-0.000406875	0.000943434	23	0
A_09_P021256	euchromatic gene	-0.46077	0.210189	0.138748	26	0
A_09_P021261	euchromatic gene	0.1038	-0.0362608	0.0799078	14	0
A_09_P021266	euchromatic gene	-0.249284	0.118274	0.0312514	23	0
A_09_P021271	euchromatic gene	-0.2276	-0.00385353	-0.0763646	22	0.917399
A_09_P021276	euchromatic gene	-0.250524	0.186028	0.0983502	17	0.3058
A_09_P021281	euchromatic gene	-0.12774	0.103867	-0.0125084	19	0
A_09_P021286	euchromatic gene	-0.34623	0.127457	0.110865	18	0
A_09_P021291	euchromatic gene	-0.202306	0.0849398	-0.0177442	17	0
A_09_P021296	euchromatic gene	-0.260779	0.115232	0.062048	23	0
A_09_P021301	euchromatic gene	-0.228177	0.228151	-0.0208142	20	0
A_09_P021306	euchromatic gene	-0.301735	0.141816	0.043786	12	0
A_09_P021311	euchromatic gene	-0.137836	-0.0223484	0.0547433	23	0
A_09_P021316	euchromatic gene	-0.140821	-0.095034	-0.114089	27	0
A_09_P021321	euchromatic gene	-0.166564	0.0543562	0.0894709	13	0
A_09_P021326	euchromatic gene	-0.0718012	-0.0271463	0.257239	20	0
A_09_P021331	euchromatic gene	0.150446	-0.327387	-0.184567	12	0.3058
A_09_P021336	euchromatic gene	-0.199766	-0.0588512	0.197369	3	0
A_09_P021341	euchromatic gene	-0.162093	-0.106553	0.00373106	25	0
A_09_P021346	euchromatic gene	-0.310132	0.270528	0.256182	6	0
A_09_P021351	euchromatic gene	-0.241265	-0.0384467	-0.0133927	30	0.3058
A_09_P021356	euchromatic gene	-0.176129	0.261904	0.0165186	20	0
A_09_P021361	euchromatic gene	0.189993	-0.0380363	-0.226056	17	0
A_09_P021366	euchromatic gene	-0.2726	0.145146	0.0125415	22	0
A_09_P021371	euchromatic gene	-0.114246	-0.00526037	-0.109943	19	0
A_09_P021376	euchromatic gene	-0.303712	0.215466	0.0514493	11	0
A_09_P021381	euchromatic gene	-0.165782	0.172074	-0.0174451	16	0
A_09_P021386	euchromatic gene	-0.283584	0.079658	-0.0980358	17	0.3058
A_09_P021391	euchromatic gene	-0.136225	0.0235322	-0.0230333	26	0
A_09_P021396	euchromatic gene	0.176103	-0.145202	-0.216391	15	0.3058
A_09_P021401	euchromatic gene	0.0676698	-0.142931	-0.288555	14	0.6116
A_09_P021406	euchromatic gene	-0.37787	0.063315	0.244405	17	0
A_09_P021411	euchromatic gene	-0.143144	0.0835639	-0.129353	25	0.6116
A_09_P021416	euchromatic gene	-0.256631	0.0610962	0.0215058	17	0
A_09_P021421	euchromatic gene	-0.068014	0.0447923	-0.0753548	21	0.3058
A_09_P021426	euchromatic gene	0.0949791	-0.103452	-0.210309	13	0
A_09_P021431	euchromatic gene	-0.169405	0.251038	0.106377	14	0
A_09_P021436	euchromatic gene	-0.116887	0.122181	0.069287	22	0
A_09_P021441	euchromatic gene	-0.104623	-0.116965	-0.18459	18	0
A_09_P021446	euchromatic gene	-0.20073	0.00791728	0.0113018	13	0.6116
A_09_P021456	euchromatic gene	0.217346	-0.162434	-0.202302	15	0
A_09_P021461	euchromatic gene	0.0126418	-0.146003	-0.193745	22	0
A_09_P021466	euchromatic gene	-0.297485	0.221683	0.180792	11	0
A_09_P021471	euchromatic gene	-0.100009	0.0135134	-0.111727	22	0
A_09_P021476	euchromatic gene	-0.0346498	0.00298096	-0.125326	14	0
A_09_P021481	euchromatic gene	-0.19845	0.0462697	0.034645	17	0
A_09_P021486	euchromatic gene	-0.282515	0.292181	0.100399	12	0
A_09_P021491	euchromatic gene	-0.0515401	0.22297	0.0561175	18	0
A_09_P021496	euchromatic gene	-0.11989	0.085121	0.0292898	34	0
A_09_P021501	euchromatic gene	-0.0901898	-0.0116943	-0.126376	15	0
A_09_P021506	euchromatic gene	-1.13507	-1.47128	-0.63578	13	0
A_09_P021511	euchromatic gene	-0.227389	0.197733	-0.0514942	12	0
A_09_P021516	euchromatic gene	-0.14911	0.0802207	-0.039283	21	0
A_09_P021521	euchromatic gene	-0.143984	0.0295127	-0.103042	20	0
A_09_P021526	euchromatic gene	0.0651867	-0.0747867	-0.188679	20	0
A_09_P021531	euchromatic gene	-0.0240684	0.0377846	0.00312046	18	0.3058
A_09_P021536	euchromatic gene	-0.193594	-0.0463525	0.0335176	36	0
A_09_P021541	euchromatic gene	-0.173897	-0.0684631	-0.142261	17	0
A_09_P021546	euchromatic gene	-0.174313	-0.00990239	-0.0753449	28	0
A_09_P021551	euchromatic gene	-0.0765481	-0.0482715	-0.289935	19	0
A_09_P021556	euchromatic gene	-0.0366544	-0.0614759	-0.0646741	21	0
A_09_P021561	euchromatic gene	-0.138573	0.0927164	-0.0295013	27	0
A_09_P021566	euchromatic gene	-0.322006	0.121622	0.21174	20	0
A_09_P021571	euchromatic gene	-0.385994	0.188797	0.223209	8	0
A_09_P021576	euchromatic gene	-0.277863	0.0866579	0.0377284	15	0
A_09_P021581	euchromatic gene	-0.0813641	-0.125029	-0.310718	9	0
A_09_P021586	euchromatic gene	-0.273588	0.185783	0.0700515	15	0
A_09_P021591	euchromatic gene	-0.267095	0.0957749	0.0649619	32	0
A_09_P021596	euchromatic gene	-0.0107097	-0.0158422	-0.0580305	21	0
A_09_P021601	euchromatic gene	-0.206456	0.0826796	-0.0544406	19	0
A_09_P021606	euchromatic gene	-0.172952	0.0567246	-0.150535	27	0
A_09_P021611	euchromatic gene	-0.0651236	0.0516788	0.0174261	21	0
A_09_P021616	euchromatic gene	-0.0270027	0.0273763	-0.112503	15	0
A_09_P021621	euchromatic gene	-0.255102	0.132304	0.0602706	13	0
A_09_P021626	euchromatic gene	-0.438899	0.303583	0.219406	22	0
A_09_P021631	euchromatic gene	-0.0802229	0.053947	-0.0919195	21	0
A_09_P021636	euchromatic gene	0.0778807	0.0734163	-0.0759271	16	0
A_09_P021641	euchromatic gene	0.0312481	-0.0222914	0.06369	18	0
A_09_P021646	euchromatic gene	-0.235168	-5.29253e-05	-0.0313261	11	0
A_09_P021651	euchromatic gene	-0.412345	0.173334	0.157515	23	0
A_09_P021656	euchromatic gene	-0.129675	0.121033	0.0442574	27	0
A_09_P021661	euchromatic gene	-0.255775	0.191879	0.0767824	14	0
A_09_P021666	euchromatic gene	-0.168512	-0.0138574	-0.0402601	36	0
A_09_P021671	euchromatic gene	-0.161	0.169754	0.0780925	27	0
A_09_P021676	euchromatic gene	-0.228823	-0.134271	-0.0428986	22	0
A_09_P021681	euchromatic gene	-0.525491	-0.118395	0.0185637	28	0
A_09_P021686	euchromatic gene	-0.215555	-0.148499	-0.000710225	25	0
A_09_P021691	euchromatic gene	0.0774199	-0.432214	-0.318942	10	0
A_09_P021696	euchromatic gene	-0.0811214	0.0117822	0.0367475	10	0
A_09_P021701	euchromatic gene	-0.0443857	-0.11521	0.0260894	22	0
A_09_P021706	euchromatic gene	-0.21527	0.00972191	0.00870418	22	0
A_09_P021711	euchromatic gene	-0.155299	-0.110645	-0.0696802	17	0
A_09_P021716	euchromatic gene	-0.301728	0.0944333	0.186106	13	0
A_09_P021721	euchromatic gene	-0.0288046	-0.438211	-0.16239	14	0
A_09_P021726	euchromatic gene	-0.128092	-0.11812	-0.127149	23	0
A_09_P021731	euchromatic gene	-0.0664695	-0.0878647	-0.121661	10	0
A_09_P021736	euchromatic gene	-0.335021	0.457172	0.353392	21	0
A_09_P021741	euchromatic gene	0.00669796	-0.128833	-0.249476	27	0
A_09_P021746	euchromatic gene	-1.5127	0.281655	0.886289	23	0
A_09_P021751	euchromatic gene	-0.399036	0.153505	0.260299	20	0.3058
A_09_P021756	euchromatic gene	-0.246654	0.140651	0.21606	26	0.3058
A_09_P021761	euchromatic gene	-0.382597	0.0348663	0.213327	10	0
A_09_P021766	euchromatic gene	-0.367322	0.141414	0.177752	18	0
A_09_P021771	euchromatic gene	-0.0817749	0.109089	0.0611021	20	0
A_09_P021776	euchromatic gene	-0.286343	0.308437	0.205575	19	0
A_09_P021781	euchromatic gene	0.0647768	0.000776716	-0.183709	29	0
A_09_P021786	euchromatic gene	0.0929139	0.0168293	-0.260165	23	0
A_09_P021791	euchromatic gene	-0.0798213	0.0699552	-0.0878594	10	0
A_09_P021796	euchromatic gene	-0.0539714	-0.107687	-0.140766	21	0
A_09_P021801	euchromatic gene	-0.0890866	-0.180382	-0.0729016	27	0
A_09_P021806	euchromatic gene	0.201644	0.0635536	-0.0632676	17	0
A_09_P021811	euchromatic gene	-0.0423471	0.109894	0.124059	11	0
A_09_P021816	euchromatic gene	-0.286424	0.164501	0.0207637	21	0
A_09_P021821	euchromatic gene	-0.0881523	-0.0705608	-0.255296	24	0.6116
A_09_P021826	euchromatic gene	-0.144058	-0.124392	0.115298	11	0
A_09_P021831	euchromatic gene	-0.123549	0.0728883	-0.0544681	21	0
A_09_P021836	euchromatic gene	-0.0496683	-0.229808	-0.295864	11	0
A_09_P021841	euchromatic gene	-0.045643	-0.00973492	-0.0317138	17	0
A_09_P021846	euchromatic gene	-0.365199	0.248991	0.199781	28	0
A_09_P021851	euchromatic gene	-0.457252	0.319795	0.356497	14	0
A_09_P021856	euchromatic gene	0.155949	-0.218665	-0.127338	18	0
A_09_P021861	euchromatic gene	0.242605	-0.0538813	-0.157952	5	0
A_09_P021866	euchromatic gene	-0.0902093	-0.0250959	-0.0856329	18	0
A_09_P021871	euchromatic gene	-0.294877	0.00922371	0.0390221	0	0
A_09_P021876	euchromatic gene	-0.148373	0.0703729	0.0904059	18	0
A_09_P021881	euchromatic gene	0.237986	-0.129811	-0.157248	19	0
A_09_P021886	euchromatic gene	-0.223245	0.0292416	-0.0387805	22	0
A_09_P021891	euchromatic gene	-0.212578	0.126308	0.118095	20	0
A_09_P021896	euchromatic gene	-0.209927	0.0031393	0.0319377	28	0.3058
A_09_P021901	euchromatic gene	-0.412114	0.296916	0.122172	23	0
A_09_P021911	euchromatic gene	-0.199073	0.167272	-0.015621	0	0
A_09_P021916	euchromatic gene	-0.41929	0.215738	0.0911227	19	0
A_09_P021921	euchromatic gene	-0.0982027	0.00841088	-0.103298	6	0
A_09_P021926	euchromatic gene	-0.912358	0.272611	0.380829	9	0
A_09_P021931	euchromatic gene	0.253391	-0.194623	-0.264729	19	0
A_09_P021936	euchromatic gene	-0.728407	-2.25702	-1.05163	14	0
A_09_P021941	euchromatic gene	-0.312956	-0.00440617	-0.0539248	23	0
A_09_P021946	euchromatic gene	0.0631968	-0.0100424	-0.195718	22	0
A_09_P021951	euchromatic gene	-0.190737	-0.0363898	0.00052663	18	0
A_09_P021956	euchromatic gene	-0.245308	0.11988	0.0281788	18	0
A_09_P021961	euchromatic gene	-0.0983418	-0.0299944	-0.00428437	10	0
A_09_P021966	euchromatic gene	-0.108519	0.0049703	0.162152	28	0.3058
A_09_P021971	euchromatic gene	-0.116685	0.154239	-0.0463464	15	0
A_09_P021976	euchromatic gene	-0.227803	0.0149423	-0.0499361	13	0
A_09_P021981	euchromatic gene	-0.167797	-0.401602	-0.171459	16	0
A_09_P021986	euchromatic gene	-0.184197	-0.281759	-0.0902279	23	0
A_09_P021991	euchromatic gene	-0.145261	-0.0778884	-0.0916419	8	0
A_09_P021996	euchromatic gene	-0.248626	0.157468	0.307492	17	0
A_09_P022001	euchromatic gene	-0.173395	0.0780191	0.0377994	1	0
A_09_P022006	euchromatic gene	-0.267841	-0.0687671	0.0498781	27	0
A_09_P022011	euchromatic gene	-0.103939	-0.0293894	-0.166968	18	0
A_09_P022016	euchromatic gene	-0.0230354	-0.0582426	-0.168309	21	0
A_09_P022021	euchromatic gene	-0.253328	-0.396186	-0.0826002	18	0
A_09_P022031	euchromatic gene	0.636655	-0.884238	-0.768755	18	0
A_09_P022036	euchromatic gene	0.0252267	-1.12032	-0.41311	23	0
A_09_P022041	euchromatic gene	-0.341042	-1.10773	-0.198921	12	0
A_09_P022046	euchromatic gene	-0.231252	-0.944955	-0.130735	11	0
A_09_P022051	euchromatic gene	-0.305326	-0.466922	-0.023487	26	0
A_09_P022056	euchromatic gene	-0.220914	-0.840362	-0.691377	22	0
A_09_P022061	euchromatic gene	-0.209829	-0.0373363	-0.1131	21	0
A_09_P022066	euchromatic gene	-0.0852264	0.0840685	-0.143483	24	0
A_09_P022071	euchromatic gene	-0.134919	0.0350141	-0.0708005	23	0
A_09_P022076	euchromatic gene	0.0272751	-0.0966398	-0.0646924	14	0
A_09_P022081	euchromatic gene	-0.0991256	-0.0712447	-0.192979	12	0
A_09_P022086	euchromatic gene	0.106497	0.112938	0.206972	24	0
A_09_P022091	euchromatic gene	-0.101671	0.130557	0.10778	28	0
A_09_P022096	euchromatic gene	-0.106636	0.0758958	0.00964646	19	0
A_09_P022101	euchromatic gene	-0.0852571	-0.0880541	-0.0230398	23	0
A_09_P022106	euchromatic gene	0.205916	-0.181794	-0.31372	22	0
A_09_P022111	euchromatic gene	-0.0211757	-0.103841	-0.237202	24	0
A_09_P022116	euchromatic gene	-0.316465	0.134981	0.112219	24	0
A_09_P022121	euchromatic gene	-0.286459	0.0739394	0.042662	19	0
A_09_P022126	euchromatic gene	0.143225	-0.215845	-0.223844	12	0
A_09_P022136	euchromatic gene	-0.338584	0.148057	0.192135	12	0
A_09_P022141	euchromatic gene	-0.38075	0.0954098	0.00655011	27	0.3058
A_09_P022146	euchromatic gene	-0.435706	0.204548	0.0940779	19	0
A_09_P022151	euchromatic gene	-0.163358	0.152647	0.0370708	30	0
A_09_P022156	euchromatic gene	0.0642676	-0.120269	-0.208666	18	0
A_09_P022161	euchromatic gene	-0.0672885	0.00923135	-0.0978405	16	0
A_09_P022166	euchromatic gene	-0.179	0.432233	0.153291	18	0
A_09_P022171	euchromatic gene	-0.0271763	-0.110762	-0.0857893	23	0
A_09_P022176	euchromatic gene	-0.0213257	-0.161896	-0.0604479	15	0
A_09_P022181	euchromatic gene	-0.297166	0.14508	-0.0164232	27	0
A_09_P022186	euchromatic gene	-0.551909	0.32246	0.163067	14	0
A_09_P022191	euchromatic gene	0.0391006	-0.0818868	-0.173794	21	0
A_09_P022196	euchromatic gene	-0.242048	-0.126779	-0.0540532	16	0
A_09_P022206	euchromatic gene	-0.42472	0.25711	0.174753	15	0
A_09_P022211	euchromatic gene	-0.22149	-0.0107407	0.058708	30	0
A_09_P022216	euchromatic gene	-0.320568	0.0740863	-0.107464	29	0
A_09_P022221	euchromatic gene	-0.371126	-0.0723698	-0.0185977	20	0.3058
A_09_P022226	euchromatic gene	-0.443012	0.287635	0.393252	22	0
A_09_P022231	euchromatic gene	-0.534892	0.244047	0.237373	26	0
A_09_P022236	euchromatic gene	-0.0952183	0.126496	0.131925	15	0
A_09_P022241	euchromatic gene	-0.00692183	0.0076262	-0.0599698	20	0
A_09_P022246	euchromatic gene	-0.426447	0.304321	0.176848	17	0
A_09_P022251	euchromatic gene	-0.0907423	0.0175029	-0.296168	17	0
A_09_P022256	euchromatic gene	-0.226281	0.137533	-0.000177747	23	0
A_09_P022261	euchromatic gene	-0.182256	0.230165	0.115227	20	0
A_09_P022266	euchromatic gene	-0.0810947	0.152585	-0.0552054	0	0
A_09_P022271	euchromatic gene	-0.18343	0.086004	0.118919	12	0
A_09_P022276	euchromatic gene	-0.250753	0.18538	0.0881106	12	0
A_09_P022281	euchromatic gene	-0.112185	-0.0621629	-0.0607106	14	0
A_09_P022286	euchromatic gene	-0.268268	0.0816561	-0.104469	22	0
A_09_P022291	euchromatic gene	-0.363801	0.106782	0.124268	18	0
A_09_P022296	euchromatic gene	-0.217334	0.103823	-0.0417302	13	0.3058
A_09_P022301	euchromatic gene	-0.172747	0.0242586	-0.00268714	17	0.3058
A_09_P022306	euchromatic gene	-0.0595029	-0.0653097	-0.15037	20	0.6116
A_09_P022311	euchromatic gene	-0.21402	-0.090929	-0.161969	19	0
A_09_P022316	euchromatic gene	0.374997	-0.23279	-0.290864	13	0
A_09_P022321	euchromatic gene	-0.342379	0.158149	0.199527	15	0
A_09_P022326	euchromatic gene	0.0345059	-0.256201	-0.262473	23	0
A_09_P022331	euchromatic gene	-0.328516	0.187766	0.188844	22	0.3058
A_09_P022336	euchromatic gene	-0.0803604	-0.229894	-0.249551	20	0
A_09_P022341	euchromatic gene	-0.145092	0.0665793	0.0660228	15	0
A_09_P022346	euchromatic gene	-0.223585	-0.171881	-0.132578	14	0
A_09_P022351	euchromatic gene	-0.034521	-0.0844463	-0.100986	25	0
A_09_P022356	euchromatic gene	-0.536557	0.190722	0.103725	28	0
A_09_P022361	euchromatic gene	-0.145493	0.0578452	0.0506075	16	0
A_09_P022366	euchromatic gene	-0.173326	0.00710845	-0.134499	5	0
A_09_P022371	euchromatic gene	-0.164341	0.117567	-0.0577351	19	0
A_09_P022376	euchromatic gene	-0.0974661	-0.0106333	-0.150102	15	0
A_09_P022381	euchromatic gene	-0.176	0.112963	0.00624174	17	0
A_09_P022386	euchromatic gene	-0.0129788	-0.0817622	-0.0143188	24	0
A_09_P022391	euchromatic gene	-0.144122	0.260851	0.240546	17	0
A_09_P022396	euchromatic gene	-0.34793	0.249729	0.103731	13	0
A_09_P022401	euchromatic gene	-0.526373	0.358975	0.297752	12	0
A_09_P022406	euchromatic gene	-0.0870405	-0.069336	-0.137408	17	0
A_09_P022411	euchromatic gene	-0.070673	0.106859	-0.172974	10	0
A_09_P022416	euchromatic gene	-0.0580639	0.0667052	-0.0487429	21	0
A_09_P022421	euchromatic gene	-0.381473	0.378288	0.236579	0	0
A_09_P022426	euchromatic gene	0.0482145	0.0581548	-0.210138	8	0
A_09_P022431	euchromatic gene	-0.162229	0.0445092	-0.156623	13	0
A_09_P022436	euchromatic gene	-0.414242	0.0984456	-0.0927295	14	0
A_09_P022441	euchromatic gene	-0.103651	0.101771	-0.000168621	17	0.3058
A_09_P022446	euchromatic gene	-0.264648	0.0618428	-0.0135166	23	0
A_09_P022451	euchromatic gene	-0.494745	0.348759	0.108314	23	0
A_09_P022456	euchromatic gene	-0.227426	0.0326418	0.0315334	21	0
A_09_P022461	euchromatic gene	-0.0872777	0.11549	0.00817431	8	0
A_09_P022466	euchromatic gene	-0.148954	0.112679	-0.159054	19	0
A_09_P022471	euchromatic gene	-0.0904565	-0.0611713	-0.177654	14	0
A_09_P022476	euchromatic gene	-0.140163	0.0409025	-0.178693	15	0
A_09_P022481	euchromatic gene	0.13608	-0.300034	-0.248803	14	0
A_09_P022486	euchromatic gene	-0.0908458	5.79145e-05	-0.187504	27	0
A_09_P022491	euchromatic gene	-0.408277	0.203695	0.0340554	17	0
A_09_P022496	euchromatic gene	-0.0044904	-0.0243605	-0.135041	16	0.3058
A_09_P022501	euchromatic gene	-0.165865	-0.0433499	-0.0851143	12	0
A_09_P022506	euchromatic gene	-0.146197	-0.00324773	-0.167852	1	0
A_09_P022511	euchromatic gene	-0.316983	0.078229	0.137545	19	0.6116
A_09_P022516	euchromatic gene	-0.301782	0.198409	0.0999962	17	0
A_09_P022521	euchromatic gene	-0.13172	-0.00301064	-0.0788157	28	0
A_09_P022526	euchromatic gene	-0.0804079	-0.00478801	-0.025615	12	0
A_09_P022531	euchromatic gene	-0.0894484	-0.124661	-0.182136	22	0
A_09_P022536	euchromatic gene	0.00221794	-0.0541069	-0.220381	14	0
A_09_P022541	euchromatic gene	-0.259047	0.0314503	-0.0803603	21	0
A_09_P022546	euchromatic gene	-0.0935402	-0.0579657	-0.142604	12	0
A_09_P022551	euchromatic gene	0.0544083	-0.194196	-0.154103	15	0.3058
A_09_P022556	euchromatic gene	-0.213204	0.119954	0.021391	16	0
A_09_P022561	euchromatic gene	0.0314243	0.112986	0.14813	16	0
A_09_P022566	euchromatic gene	-0.371638	0.11014	0.0780397	17	0
A_09_P022571	euchromatic gene	-0.25662	0.172192	0.286829	22	0
A_09_P022576	euchromatic gene	-0.273131	-0.220735	-0.327689	20	0
A_09_P022581	euchromatic gene	0.128516	-0.123339	-0.229416	25	0
A_09_P022586	euchromatic gene	-0.22032	0.0556403	-0.0513416	19	0
A_09_P022591	euchromatic gene	-0.378862	0.173032	0.148088	20	0
A_09_P022596	euchromatic gene	-0.329979	0.093703	0.149704	18	0
A_09_P022601	euchromatic gene	-0.160302	-0.437983	-0.0183289	17	0
A_09_P022606	euchromatic gene	-0.186645	0.038288	0.101291	16	0
A_09_P022611	euchromatic gene	-0.223751	0.133862	0.268057	5	0
A_09_P022616	euchromatic gene	-0.102123	0.112991	0.415368	23	0.3058
A_09_P022621	euchromatic gene	-0.470169	0.179022	0.744448	21	0
A_09_P022626	euchromatic gene	-0.00972805	-0.0165969	0.336399	21	0
A_09_P022631	euchromatic gene	-0.294036	0.146837	0.80592	16	0
A_09_P022636	euchromatic gene	-0.501223	0.351406	0.827602	23	0
A_09_P022641	euchromatic gene	-0.234188	0.121024	0.670153	25	0
A_09_P022646	euchromatic gene	0.0807306	-0.136441	0.789449	26	0.3058
A_09_P022651	euchromatic gene	0.0853542	-0.135094	0.475377	14	0
A_09_P022656	euchromatic gene	-0.257228	0.136531	0.89944	20	0
A_09_P022661	euchromatic gene	-0.194446	0.297933	0.251458	19	0
A_09_P022666	euchromatic gene	-0.313403	0.320374	0.207987	2	0
A_09_P022671	euchromatic gene	-0.113472	0.0428401	-0.0286229	25	0
A_09_P022681	euchromatic gene	-0.505918	0.261451	0.162211	29	0.3058
A_09_P022686	euchromatic gene	-0.121288	0.0841387	0.0339409	24	0
A_09_P022691	euchromatic gene	-0.168122	-0.119343	0.048495	15	0
A_09_P022696	euchromatic gene	-0.607697	0.205751	0.438136	14	0
A_09_P022701	euchromatic gene	-0.332332	0.274338	0.317952	20	0.3058
A_09_P022706	euchromatic gene	-0.23286	0.0138152	-0.160786	20	0
A_09_P022711	euchromatic gene	-0.1013	-1.27753	-0.348254	23	0
A_09_P022716	euchromatic gene	0.0307714	-1.46058	-0.363603	13	0
A_09_P022721	euchromatic gene	-0.372231	-1.4547	-0.292038	21	0
A_09_P022726	euchromatic gene	-0.176493	-1.68873	-0.300702	18	0
A_09_P022731	euchromatic gene	-0.0668219	-1.22966	-0.426508	18	0
A_09_P022736	euchromatic gene	0.0123451	-1.00033	-0.410067	22	0
A_09_P022741	euchromatic gene	-0.178924	-0.304804	-0.171559	15	0
A_09_P022746	euchromatic gene	-0.0127851	-0.271434	-0.180128	10	0
A_09_P022751	euchromatic gene	-0.18988	-0.373132	-0.427149	25	0
A_09_P022756	euchromatic gene	-0.175665	0.118457	0.188437	15	0
A_09_P022761	euchromatic gene	-0.156721	0.0263663	-0.0748508	19	0
A_09_P022766	euchromatic gene	-0.305138	0.125184	0.211272	18	0
A_09_P022771	euchromatic gene	-0.0531727	-0.101794	0.0617942	24	0
A_09_P022776	euchromatic gene	-0.120399	0.0968911	0.00419712	17	0
A_09_P022781	euchromatic gene	-0.149359	0.0583786	0.0895507	26	0
A_09_P022786	euchromatic gene	-0.223873	0.0196131	0.0770007	23	0
A_09_P022791	euchromatic gene	0.0640265	-0.144583	-0.225379	5	0
A_09_P022796	euchromatic gene	-0.11791	0.0459734	-0.106835	13	0
A_09_P022801	euchromatic gene	-0.154674	0.109894	-0.0226407	15	0
A_09_P022806	euchromatic gene	0.110255	-0.027679	-0.142698	10	0.3058
A_09_P022811	euchromatic gene	-0.139167	-0.1917	-0.113849	13	0
A_09_P022816	euchromatic gene	0.0869626	-0.315737	-0.266524	12	0
A_09_P022821	euchromatic gene	-0.225845	0.173339	0.0914705	21	0.6116
A_09_P022826	euchromatic gene	-0.139806	0.114825	-0.0985714	24	0.3058
A_09_P022831	euchromatic gene	-0.0881402	0.0993096	0.187538	22	0
A_09_P022836	euchromatic gene	-0.144413	0.0104061	0.0738617	22	0
A_09_P022841	euchromatic gene	-0.0223296	0.12025	0.0242213	22	0
A_09_P022846	euchromatic gene	-0.0814472	-0.0303733	-0.0749217	18	0
A_09_P022851	euchromatic gene	-0.121336	0.292223	0.08513	27	0.3058
A_09_P022856	euchromatic gene	-0.257963	0.133837	0.0152984	17	0.3058
A_09_P022861	euchromatic gene	-0.096426	0.192276	-0.0456786	17	0
A_09_P022866	euchromatic gene	0.0557596	-0.0336657	-0.148818	21	0
A_09_P022871	euchromatic gene	-0.0320641	-0.0180618	0.171274	13	0
A_09_P022876	euchromatic gene	-0.121731	-0.0353586	0.0516571	22	0
A_09_P022881	euchromatic gene	-0.0337261	-0.0436938	-0.200089	21	0
A_09_P022886	euchromatic gene	0.0312591	-2.26765	-0.640287	18	0
A_09_P022891	euchromatic gene	-0.221367	-2.45492	-0.608933	16	0.3058
A_09_P022896	euchromatic gene	0.10741	-2.53176	-0.778555	14	0
A_09_P022901	euchromatic gene	-0.0136199	-1.4969	-0.671863	20	0
A_09_P022906	euchromatic gene	-0.284318	-2.67267	-0.676286	10	0
A_09_P022911	euchromatic gene	-0.13488	-2.05792	-0.488433	22	0
A_09_P022916	euchromatic gene	-0.13623	-1.80207	-0.655354	14	0
A_09_P022921	euchromatic gene	-0.150407	0.0726035	-0.0584687	14	0
A_09_P022926	euchromatic gene	-0.146042	0.105709	-0.00622144	13	0
A_09_P022931	euchromatic gene	-0.223576	0.170681	-0.0430807	15	0
A_09_P022936	euchromatic gene	-0.103781	0.101568	-0.020452	9	0
A_09_P022941	euchromatic gene	-0.283342	0.221342	0.167459	13	0.3058
A_09_P022946	euchromatic gene	0.173256	-0.0105828	0.00151734	16	0
A_09_P022951	euchromatic gene	-0.238466	0.0734976	-0.0787873	16	0
A_09_P022956	euchromatic gene	-0.019856	-0.0438	-0.0936785	9	0
A_09_P022961	euchromatic gene	-0.176006	0.0195111	-0.144433	15	0.917399
A_09_P022966	euchromatic gene	-0.141824	0.0805959	-0.0332041	13	0
A_09_P022971	euchromatic gene	-0.200526	0.080372	0.113587	12	0
A_09_P022976	euchromatic gene	-0.323754	-0.0336066	0.0705476	20	0
A_09_P022981	euchromatic gene	-0.16737	0.123213	0.126918	26	0
A_09_P022986	euchromatic gene	-0.099193	-0.217425	0.034613	17	0
A_09_P022991	euchromatic gene	0.165621	-0.46673	-0.117057	16	0
A_09_P022996	euchromatic gene	-0.123768	-0.570269	-0.130081	22	0
A_09_P023001	euchromatic gene	-0.0755245	-0.771736	-0.078009	21	0.6116
A_09_P023006	euchromatic gene	-0.0908984	-1.57167	-0.191013	25	0
A_09_P023011	euchromatic gene	-0.231074	-1.46292	-0.174716	10	0
A_09_P023016	euchromatic gene	0.157491	-1.96252	-0.376847	14	0
A_09_P023021	euchromatic gene	-0.224048	-1.50949	-0.308688	14	0
A_09_P023026	euchromatic gene	-0.131087	-2.5586	-0.472005	15	0
A_09_P023031	euchromatic gene	-0.253138	-0.346461	0.092762	16	0
A_09_P023036	euchromatic gene	-0.220473	-0.207651	0.0781605	30	0
A_09_P023041	euchromatic gene	0.0027222	-0.403777	0.0563182	17	0
A_09_P023046	euchromatic gene	0.0965184	-0.5729	0.0113838	13	0.6116
A_09_P023051	euchromatic gene	0.0521588	-0.360416	-0.222961	22	0
A_09_P023061	euchromatic gene	0.166022	-0.462087	-0.283813	19	0.3058
A_09_P023066	euchromatic gene	-0.0899488	-0.10349	-0.127793	24	0
A_09_P023071	euchromatic gene	-0.449173	0.188145	0.0658487	15	0
A_09_P023076	euchromatic gene	-0.412969	-0.0464958	0.0811394	24	0
A_09_P023081	euchromatic gene	-0.0969845	-0.204539	-0.0935455	8	0
A_09_P023086	euchromatic gene	-0.145812	-0.243235	-0.0816063	18	0.917399
A_09_P023091	euchromatic gene	-0.125552	-0.188721	0.0132587	12	0
A_09_P023096	euchromatic gene	-0.201764	-0.419821	-0.24304	23	0
A_09_P023101	euchromatic gene	-0.179973	-0.546908	-0.266308	20	0.6116
A_09_P023106	euchromatic gene	-0.209274	0.0381879	-0.204585	14	0
A_09_P023111	euchromatic gene	-0.00545432	-0.0548795	-0.00267524	26	0
A_09_P023116	euchromatic gene	-0.083618	0.0229966	-0.146052	0	0
A_09_P023122	euchromatic gene	-0.334528	0.209717	0.282299	18	0
A_09_P023126	euchromatic gene	-0.216608	0.209503	-0.0188075	19	0
A_09_P023131	euchromatic gene	-0.128292	0.00609331	-0.189991	7	0
A_09_P023136	euchromatic gene	-0.0119356	0.148424	-0.142575	14	0
A_09_P023141	euchromatic gene	-0.124273	0.0232875	0.000731864	12	0
A_09_P023146	euchromatic gene	-0.247585	0.131881	-0.046133	22	0
A_09_P023151	euchromatic gene	-0.217407	0.0628318	-0.182786	11	0
A_09_P023156	euchromatic gene	-0.43481	0.1012	0.0734234	25	0
A_09_P023161	euchromatic gene	0.0818533	-0.103593	-0.246882	13	0
A_09_P023166	euchromatic gene	-0.184713	-0.0437591	-0.295275	24	0
A_09_P023171	euchromatic gene	-0.365681	0.0702114	-0.0279853	19	0
A_09_P023176	euchromatic gene	-0.310669	0.147559	0.178927	20	0
A_09_P023181	euchromatic gene	-0.267644	0.213902	-0.110301	10	0
A_09_P023186	euchromatic gene	-0.67399	0.20423	0.814777	15	0
A_09_P023191	euchromatic gene	-0.378948	0.185849	0.0255818	23	0
A_09_P023196	euchromatic gene	-0.102414	-0.0244208	-0.208177	15	0.3058
A_09_P023201	euchromatic gene	-0.017796	-0.105466	0.00417258	16	0
A_09_P023206	euchromatic gene	-0.787469	-0.0388049	0.279302	22	0
A_09_P023211	euchromatic gene	0.0042586	-0.194813	-0.00270534	11	0
A_09_P023216	euchromatic gene	-0.321415	0.139793	0.0569273	20	0.3058
A_09_P023221	euchromatic gene	-0.743432	0.558347	0.705222	20	0.3058
A_09_P023226	euchromatic gene	-0.0682963	-0.0689674	-0.162958	21	0
A_09_P023231	euchromatic gene	-0.103921	-0.11	-0.0987525	21	0
A_09_P023236	euchromatic gene	-0.156428	0.0686834	-0.00705337	20	0
A_09_P023241	euchromatic gene	-0.150361	0.124131	0.0952524	13	0
A_09_P023246	euchromatic gene	-0.454341	0.23761	0.134444	11	0.3058
A_09_P023251	euchromatic gene	-0.240039	-0.0240334	-0.0453631	18	0.6116
A_09_P023256	euchromatic gene	-0.114436	0.0712671	-0.146942	19	0
A_09_P023261	euchromatic gene	0.154007	-0.119548	-0.204791	17	0
A_09_P023266	euchromatic gene	-0.190277	-0.0528182	-0.0499878	14	0
A_09_P023271	euchromatic gene	-0.478035	-0.638871	-0.346559	11	0
A_09_P023276	euchromatic gene	-0.17387	0.109776	-0.0150543	26	0
A_09_P023281	euchromatic gene	0.0672483	-0.122427	-0.12388	18	0.3058
A_09_P023286	euchromatic gene	-0.156642	0.206983	0.114241	15	0
A_09_P023291	euchromatic gene	-0.370552	0.158246	0.00289126	21	0
A_09_P023296	euchromatic gene	-0.0157025	0.148562	-0.069593	26	0
A_09_P023301	euchromatic gene	0.12386	-0.0893848	-0.144067	14	0
A_09_P023306	euchromatic gene	0.182307	-0.134579	-0.0728972	15	0
A_09_P023311	euchromatic gene	-0.0858846	0.0571409	-0.1651	14	0
A_09_P023316	euchromatic gene	-0.425631	0.0775085	0.0474053	10	0
A_09_P023321	euchromatic gene	-0.161292	0.0638233	0.00298899	24	0.3058
A_09_P023326	euchromatic gene	0.0686964	-0.0276684	-0.0246174	29	0
A_09_P023331	euchromatic gene	-0.183927	0.135864	-0.0559427	15	0
A_09_P023336	euchromatic gene	-0.115313	0.106706	0.0919314	21	0
A_09_P023341	euchromatic gene	-0.0246344	0.0785344	-0.00591627	14	0
A_09_P023346	euchromatic gene	-0.129383	-0.0204246	0.00524127	16	1.2232
A_09_P023351	euchromatic gene	-0.495838	0.345527	0.188796	17	0
A_09_P023356	euchromatic gene	-0.266545	0.104474	0.093111	27	0
A_09_P023361	euchromatic gene	-0.186834	-0.0138784	-0.198684	20	0
A_09_P023366	euchromatic gene	-0.156846	0.0487879	0.0743759	13	0
A_09_P023371	euchromatic gene	-0.0130143	0.0171698	0.0131811	19	0
A_09_P023381	euchromatic gene	-0.119023	-0.32806	-0.186626	27	0.3058
A_09_P023386	euchromatic gene	-0.153353	0.0825984	-0.00752778	23	0
A_09_P023391	euchromatic gene	-0.147844	-0.0219617	-0.129232	22	0
A_09_P023396	euchromatic gene	-0.116262	-0.119556	-0.0986522	21	0.6116
A_09_P023401	euchromatic gene	0.0136297	-0.24371	-0.111892	14	0
A_09_P023411	euchromatic gene	-0.0766049	-0.0357981	-0.139948	0	0
A_09_P023416	euchromatic gene	-0.256368	0.0357857	-0.145181	17	0
A_09_P023421	euchromatic gene	-0.161036	0.0128131	-0.0983066	16	0
A_09_P023426	euchromatic gene	-0.358814	0.0323082	0.0451366	13	0
A_09_P023431	euchromatic gene	-0.0684502	-0.0227221	-0.0687303	23	0
A_09_P023436	euchromatic gene	-0.336343	0.0959408	0.191956	21	0
A_09_P023441	euchromatic gene	0.0128358	0.00374249	-0.240703	13	0
A_09_P023446	euchromatic gene	-0.113944	0.0531163	-0.0562515	16	0.3058
A_09_P023451	euchromatic gene	-0.513407	0.197707	0.204494	17	0
A_09_P023456	euchromatic gene	-0.208446	0.0902177	-0.0403092	12	0
A_09_P023461	euchromatic gene	-0.341661	0.252284	0.12577	28	0
A_09_P023466	euchromatic gene	0.0779124	-0.0826926	-0.147567	19	0.3058
A_09_P023471	euchromatic gene	-0.17262	-0.0458565	0.00346602	28	0
A_09_P023476	euchromatic gene	0.0212338	0.0209159	-0.0426706	15	0
A_09_P023481	euchromatic gene	-0.0943431	0.0147969	-0.0444882	14	0
A_09_P023486	euchromatic gene	-0.188849	-0.0865022	-0.0874338	21	0
A_09_P023491	euchromatic gene	-0.158702	0.0557799	0.0258594	16	0
A_09_P023496	euchromatic gene	-0.306543	0.217792	0.104459	14	0
A_09_P023501	euchromatic gene	-0.202969	-0.0224052	-0.0164127	35	0
A_09_P023506	euchromatic gene	-0.258221	0.287819	0.176432	18	0
A_09_P023511	euchromatic gene	-0.178622	-2.27662	-0.837696	22	0.6116
A_09_P023521	euchromatic gene	-0.20543	0.124806	0.116692	23	0
A_09_P023526	euchromatic gene	0.0436846	-0.0441773	-0.0764749	21	0
A_09_P023531	euchromatic gene	-0.0397736	-0.0777955	-0.191946	9	0
A_09_P023536	euchromatic gene	-0.376848	0.149041	-0.0584385	20	0
A_09_P023541	euchromatic gene	0.0604596	-0.126317	-0.195388	0	0
A_09_P023546	euchromatic gene	-0.337881	-0.37527	-0.0864162	20	0
A_09_P023551	euchromatic gene	-0.377789	0.131589	0.118619	20	0
A_09_P023556	euchromatic gene	-0.115246	0.0487444	-0.056363	18	0
A_09_P023561	euchromatic gene	-0.191055	0.28381	0.192837	11	0
A_09_P023566	euchromatic gene	-0.336842	0.0705396	0.157792	24	0.6116
A_09_P023571	euchromatic gene	-0.21989	0.0302576	-0.0167789	17	0.3058
A_09_P023576	euchromatic gene	-0.225946	0.172941	0.0315103	19	0.3058
A_09_P023581	euchromatic gene	-0.207989	0.080191	-0.0607211	22	0
A_09_P023586	euchromatic gene	-0.0536986	-0.0254931	-0.15863	18	0
A_09_P023591	euchromatic gene	-0.326182	0.109045	0.169952	10	0
A_09_P023596	euchromatic gene	-0.444264	-0.0725136	0.080731	18	0
A_09_P023601	euchromatic gene	-0.044766	-0.0984095	0.0378311	24	0.3058
A_09_P023606	euchromatic gene	-0.00306551	0.0359167	0.0131273	11	0
A_09_P023611	euchromatic gene	-0.199919	-0.0376282	-0.0986905	18	0
A_09_P023616	euchromatic gene	-0.330174	0.0902573	0.0276602	29	0
A_09_P023621	euchromatic gene	-0.0121028	-0.333649	-0.11397	21	0
A_09_P023626	euchromatic gene	-0.146119	0.120458	-0.103199	23	0
A_09_P023631	euchromatic gene	-0.336099	0.0673376	-0.0873724	24	0
A_09_P023636	euchromatic gene	-0.319912	0.134291	0.0482516	29	0
A_09_P023641	euchromatic gene	0.152348	-0.0854633	-0.294937	18	0
A_09_P023646	euchromatic gene	-0.389991	0.201444	0.11058	0	0
A_09_P023651	euchromatic gene	-0.0233459	0.145934	-0.0367293	28	0.3058
A_09_P023656	euchromatic gene	-0.152768	-0.100641	-0.108562	27	0
A_09_P023661	euchromatic gene	-0.0612286	0.0550697	-0.0554486	22	0
A_09_P023666	euchromatic gene	-0.020136	0.0131837	-0.135741	17	0
A_09_P023671	euchromatic gene	-0.112963	0.203087	0.0755868	21	0
A_09_P023676	euchromatic gene	-0.264978	0.258801	-0.122973	12	0
A_09_P023681	euchromatic gene	-0.416048	0.312195	0.128884	23	0
A_09_P023686	euchromatic gene	-0.0850955	0.0749674	-0.0404959	22	0
A_09_P023691	euchromatic gene	-0.084896	0.0343016	0.0949709	13	0
A_09_P023696	euchromatic gene	-0.108565	-0.010854	-0.0288522	22	0
A_09_P023701	euchromatic gene	-0.228891	0.101883	-0.00283496	28	0
A_09_P023706	euchromatic gene	-0.219177	0.108276	-0.0209341	18	0
A_09_P023711	euchromatic gene	-0.324056	-0.22902	-0.062736	13	0.3058
A_09_P023716	euchromatic gene	-0.366564	0.128908	0.0798388	14	0
A_09_P023721	euchromatic gene	-0.0770421	0.122162	0.0240622	23	0
A_09_P023726	euchromatic gene	-0.0889792	0.0868027	0.0797304	26	0
A_09_P023731	euchromatic gene	-0.353041	0.252317	0.109473	22	0
A_09_P023736	euchromatic gene	-0.121868	-0.0372813	-0.191467	22	0
A_09_P023741	euchromatic gene	-0.394865	-0.115734	-0.118222	17	0
A_09_P023746	euchromatic gene	-0.385816	0.244674	0.0413385	14	0
A_09_P023751	euchromatic gene	-0.0645592	-0.384877	-0.0554383	19	0
A_09_P023756	euchromatic gene	-0.00893009	-0.0544122	-0.108702	12	0.3058
A_09_P023761	euchromatic gene	-0.118075	0.143612	0.109273	13	0
A_09_P023766	euchromatic gene	-0.0939769	-0.103686	-0.310215	10	0
A_09_P023771	euchromatic gene	-0.194761	0.0521938	0.0139854	10	0
A_09_P023776	euchromatic gene	-0.163511	0.0428727	-0.00479288	22	0
A_09_P023781	euchromatic gene	-0.26344	0.0935512	-0.0803872	25	0
A_09_P023786	euchromatic gene	-0.101208	-0.060889	-0.209099	26	0
A_09_P023791	euchromatic gene	0.0119441	-0.0370051	-0.122694	19	0
A_09_P023796	euchromatic gene	-0.136718	0.0568601	-0.21846	12	0
A_09_P023801	euchromatic gene	0.0150084	-0.169882	-0.333842	25	0
A_09_P023806	euchromatic gene	-0.26653	0.14382	-0.0564426	15	0
A_09_P023811	euchromatic gene	-0.158626	0.0974916	-0.184522	18	0
A_09_P023816	euchromatic gene	0.0914179	-0.230026	-0.237518	15	0
A_09_P023821	euchromatic gene	-0.217622	0.22378	0.0494091	28	0
A_09_P023826	euchromatic gene	-0.179513	-0.100585	-0.148986	18	0
A_09_P023831	euchromatic gene	-0.0184703	-0.0293542	-0.263376	22	0
A_09_P023836	euchromatic gene	-0.111857	-0.0387286	-0.226927	16	0
A_09_P023841	euchromatic gene	-0.310099	0.152303	0.118292	10	0
A_09_P023846	euchromatic gene	-0.129922	-0.133388	-0.160609	16	0
A_09_P023851	euchromatic gene	0.0970675	-0.151799	-0.228046	8	0
A_09_P023856	euchromatic gene	0.0387282	-0.0997651	-0.258934	17	0
A_09_P023861	euchromatic gene	0.0209316	-0.113363	0.0529177	16	0
A_09_P023866	euchromatic gene	-0.362067	0.00174191	0.0871432	22	0
A_09_P023871	euchromatic gene	-0.325739	0.241431	0.0312593	23	0
A_09_P023876	euchromatic gene	-0.142007	0.0837867	-0.0764091	7	0
A_09_P023881	euchromatic gene	-0.192149	0.103044	-0.00723051	17	0
A_09_P023886	euchromatic gene	-0.101224	-0.102615	0.0321648	12	0.3058
A_09_P023891	euchromatic gene	-0.566189	-0.0507687	0.00830733	11	0
A_09_P023896	euchromatic gene	-0.187494	0.207454	-0.0648596	13	0
A_09_P023901	euchromatic gene	-0.0433418	0.124333	0.0444273	23	0.3058
A_09_P023906	euchromatic gene	-0.358536	0.135553	0.020073	21	0
A_09_P023911	euchromatic gene	-0.263502	-0.0630085	0.0101281	23	0
A_09_P023916	euchromatic gene	-0.154285	0.0442824	-0.148932	16	0
A_09_P023921	euchromatic gene	-0.0394718	-0.0209054	-0.11515	17	0
A_09_P023926	euchromatic gene	0.0686997	-0.196784	-0.202987	20	0.3058
A_09_P023931	euchromatic gene	0.0493706	-0.033248	-0.18629	23	0
A_09_P023936	euchromatic gene	-0.169479	-0.0374874	-0.191329	24	0
A_09_P023941	euchromatic gene	-0.243576	0.218404	0.12601	22	0
A_09_P023946	euchromatic gene	-0.0834893	-0.11173	-0.156613	26	0
A_09_P023951	euchromatic gene	-0.0750389	-0.112248	-0.011758	5	0
A_09_P023956	euchromatic gene	-0.425798	0.208793	0.176737	27	0.3058
A_09_P023961	euchromatic gene	-0.409908	0.155286	0.106843	30	0.3058
A_09_P023966	euchromatic gene	-0.0885523	0.0440459	-0.102567	23	0
A_09_P023971	euchromatic gene	-0.189264	0.07005	-0.114718	25	0
A_09_P023976	euchromatic gene	-0.172117	-0.0102063	0.00931974	19	0.3058
A_09_P023981	euchromatic gene	-0.258443	0.143253	0.116375	18	0.3058
A_09_P023986	euchromatic gene	-0.277705	0.145332	-0.0880075	19	0
A_09_P023991	euchromatic gene	0.0722217	-0.238053	-0.023559	20	0.3058
A_09_P023996	euchromatic gene	-0.243049	0.0382882	-0.208861	12	0
A_09_P024001	euchromatic gene	0.0945133	-0.101476	-0.314202	17	0.3058
A_09_P024011	euchromatic gene	0.00267024	-0.0210608	-0.290607	16	0
A_09_P024016	euchromatic gene	-0.102484	0.149891	-0.0991654	13	0
A_09_P024026	euchromatic gene	-0.0327093	0.0970118	0.0512176	14	0
A_09_P024031	euchromatic gene	0.126063	-0.570419	-0.315781	20	0
A_09_P024036	euchromatic gene	-0.362432	-0.111378	0.0727248	17	0
A_09_P024041	euchromatic gene	-0.0785812	-0.0437599	-0.149217	18	0
A_09_P024046	euchromatic gene	-0.186229	0.0886014	-0.185427	8	0
A_09_P024051	euchromatic gene	-0.268052	0.132724	-0.0900619	17	0
A_09_P024056	euchromatic gene	-0.307817	0.0804652	-0.0364452	18	0
A_09_P024061	euchromatic gene	-0.146161	-0.181657	-0.177264	35	0
A_09_P024071	euchromatic gene	-0.134103	-0.183323	-0.0797375	18	0
A_09_P024076	euchromatic gene	-0.328185	-0.0653088	0.049369	23	0
A_09_P024081	euchromatic gene	0.231807	-1.43081	-0.310954	16	0
A_09_P024086	euchromatic gene	-0.0726521	-1.20708	-0.124104	6	0
A_09_P024091	euchromatic gene	-0.19289	-1.22546	-0.203588	30	0
A_09_P024096	euchromatic gene	-0.121294	-1.45558	-0.142554	15	0
A_09_P024101	euchromatic gene	-0.441022	-1.15653	0.0420723	14	0
A_09_P029426	euchromatic gene	-0.186364	0.159047	0.0400138	23	0
A_09_P029431	euchromatic gene	-0.113041	0.0518318	-0.0501291	17	0
A_09_P029441	euchromatic gene	-0.179009	0.0349718	-0.0604177	15	0.3058
A_09_P029466	euchromatic gene	-0.16117	0.0269513	-0.209829	12	0
A_09_P029471	euchromatic gene	-0.0250958	-0.107948	-0.152729	21	0
A_09_P029496	euchromatic gene	-0.153665	0.236106	0.0396647	19	0
A_09_P029586	euchromatic gene	-0.116133	-1.65142	-0.355339	18	0
A_09_P029591	euchromatic gene	-0.0580474	-1.66192	-0.520601	11	0
A_09_P029616	euchromatic gene	-0.332541	0.0221408	0.0635522	23	0
A_09_P029651	euchromatic gene	-0.099315	0.0211437	-0.0289783	21	0
A_09_P029661	euchromatic gene	0.0282769	-2.51249	-0.366504	13	0
A_09_P029686	euchromatic gene	-0.0517271	0.0302321	-0.0861584	10	0
A_09_P029831	euchromatic gene	-0.339196	0.260566	0.18135	20	0
A_09_P029836	euchromatic gene	-0.192264	0.138108	0.152158	34	0
A_09_P029931	euchromatic gene	-0.147937	-0.465046	-0.161874	24	0
A_09_P030046	euchromatic gene	-0.381945	-0.00337874	-0.0215945	18	0
A_09_P030091	euchromatic gene	-0.156699	0.0383527	0.10837	18	0
A_09_P030156	euchromatic gene	-0.172203	0.052793	0.0853542	17	0
A_09_P030176	euchromatic gene	0.04079	-0.161026	-0.0541638	16	0
A_09_P030181	euchromatic gene	0.169508	-0.0859638	-0.149752	21	0
A_09_P030186	euchromatic gene	-0.289571	0.106675	-0.0582346	17	0
A_09_P030216	euchromatic gene	-0.295759	0.109246	0.316995	22	0
A_09_P030226	euchromatic gene	-0.248408	-0.15816	-0.0999412	24	0
A_09_P030296	euchromatic gene	0.0146684	-0.0667803	-0.217091	26	0
A_09_P030301	euchromatic gene	-0.399308	0.333386	0.202387	19	0
A_09_P030311	euchromatic gene	-0.246965	-0.0128144	0.08583	17	0
A_09_P030321	euchromatic gene	-0.252409	0.230884	0.172999	15	0
A_09_P030381	euchromatic gene	-0.209127	0.0297077	0.105147	18	0
A_09_P030386	euchromatic gene	-0.240736	0.162121	0.187041	28	0
A_09_P030391	euchromatic gene	-0.134016	0.0129059	-0.219506	16	0
A_09_P030461	euchromatic gene	-0.159959	0.124266	0.0324432	24	0
A_09_P030506	euchromatic gene	-0.165823	0.00300961	0.0886307	15	0
A_09_P030526	euchromatic gene	-0.0420117	-0.166949	-0.106034	21	0
A_09_P030631	euchromatic gene	-0.508588	0.0703745	0.0779179	27	0.6116
A_09_P030701	euchromatic gene	-0.192436	0.155788	0.06227	15	0
A_09_P030711	euchromatic gene	-0.338436	0.278224	0.168612	15	0
A_09_P030716	euchromatic gene	0.0475788	0.0626452	-0.0518094	11	0
A_09_P030746	euchromatic gene	-0.184935	-0.0871377	-0.252853	19	0
A_09_P030791	euchromatic gene	-0.183295	0.230848	0.062331	14	0
A_09_P030801	euchromatic gene	-0.132759	0.0629471	-0.093438	9	0
A_09_P030806	euchromatic gene	-0.239323	-0.110507	-0.130876	1	0
A_09_P030811	euchromatic gene	-0.100755	-0.00908639	-0.235499	16	0
A_09_P030816	euchromatic gene	-0.0912718	-0.115893	-0.123776	14	0
A_09_P030826	euchromatic gene	-0.0323789	-0.760658	-0.0883337	14	0
A_09_P030831	euchromatic gene	-0.0381453	-0.998737	-0.247391	30	0
A_09_P030866	euchromatic gene	-0.31772	0.156044	0.0887074	8	0
A_09_P030871	euchromatic gene	-0.253408	0.114999	0.203375	18	0
A_09_P030906	euchromatic gene	-0.217196	0.0880291	-0.0544391	17	0
A_09_P030916	euchromatic gene	0.11437	-0.0771533	-0.48067	19	0
A_09_P030946	euchromatic gene	0.0849592	-0.0748309	-0.145584	13	0
A_09_P031006	euchromatic gene	-0.228296	0.105865	-0.0032626	14	0
A_09_P031041	euchromatic gene	-0.144126	0.00191356	-0.033984	13	0
A_09_P031056	euchromatic gene	-0.301908	0.301819	0.320734	23	0
A_09_P031096	euchromatic gene	-0.193038	-0.0993268	-0.00702834	19	0
A_09_P031106	euchromatic gene	-0.121135	-0.0202442	-0.101943	18	0
A_09_P031126	euchromatic gene	-0.119374	-0.0357719	-0.0979443	31	0
A_09_P031131	euchromatic gene	0.00437774	-0.128053	-0.252817	18	0
A_09_P031151	euchromatic gene	-1.42048	0.181004	1.29002	14	0
A_09_P031161	euchromatic gene	-0.121094	-0.047462	-0.0941792	28	0
A_09_P031186	euchromatic gene	-0.260169	0.0503969	-0.133919	15	0
A_09_P031191	euchromatic gene	-0.197257	0.104705	0.041287	15	0
A_09_P031206	euchromatic gene	0.0423875	-0.0479183	-0.311325	18	0
A_09_P031211	euchromatic gene	-0.0952869	0.0629221	-0.161317	15	0
A_09_P031236	euchromatic gene	-0.292468	0.0181052	0.0394621	30	0
A_09_P031261	euchromatic gene	-0.748613	-0.0397298	0.119294	25	0
A_09_P031276	euchromatic gene	-0.239596	0.216632	0.0510595	15	0
A_09_P031286	euchromatic gene	0.10758	-0.118074	0.00276786	25	0.3058
A_09_P031306	euchromatic gene	-0.68654	0.260166	0.345059	18	0
A_09_P031331	euchromatic gene	-0.743093	0.0839996	0.563915	13	0
A_09_P031361	euchromatic gene	-0.0244185	-0.132648	-0.331182	10	0
A_09_P031376	euchromatic gene	-0.144853	-0.00808833	0.0257106	20	0.3058
A_09_P031416	euchromatic gene	-0.33042	0.370133	0.218479	10	0
A_09_P031466	euchromatic gene	0.776455	-1.70551	-1.17264	25	0
A_09_P031486	euchromatic gene	0.0942142	-0.197096	-0.0896816	23	0
A_09_P031491	euchromatic gene	-0.041126	-0.00631425	-0.117141	17	0
A_09_P031521	euchromatic gene	-0.447601	0.149484	0.269438	19	0.6116
A_09_P031541	euchromatic gene	-0.102127	-0.0311933	-0.204704	21	0
A_09_P031556	euchromatic gene	-0.240925	-0.370859	-0.099714	18	0
A_09_P031566	euchromatic gene	-0.17237	0.220409	0.000282322	6	0
A_09_P031616	euchromatic gene	-0.496672	0.3492	0.319299	7	0
A_09_P031691	euchromatic gene	-0.170001	-0.130348	0.0606607	25	0
A_09_P031696	euchromatic gene	-0.339204	0.154353	0.0293704	17	0
A_09_P031701	euchromatic gene	-0.451523	0.10433	0.124976	27	0
A_09_P031706	euchromatic gene	0.0454226	-0.062202	-0.16994	7	0
A_09_P031711	euchromatic gene	-0.166377	-0.0513293	0.0204093	12	0
A_09_P031731	euchromatic gene	-0.245501	-0.0364448	-0.0395669	15	0
A_09_P031736	euchromatic gene	-0.131557	0.0734983	-0.0940717	14	0.3058
A_09_P031806	euchromatic gene	-0.372539	0.140695	0.108864	10	0.917399
A_09_P031836	euchromatic gene	0.000183574	-0.00389427	-0.12242	18	0
A_09_P031936	euchromatic gene	-0.521684	0.0527165	0.341852	25	0
A_09_P031941	euchromatic gene	-0.118687	0.0362475	-0.0778182	20	0
A_09_P031951	euchromatic gene	-0.406582	0.11473	-0.0622463	11	0
A_09_P031961	euchromatic gene	-0.258892	-0.0475171	-0.00228365	28	0.6116
A_09_P031981	euchromatic gene	-0.222671	0.119959	0.0214407	20	0
A_09_P032046	euchromatic gene	-0.286777	0.10314	0.106494	16	0
A_09_P032096	euchromatic gene	-0.0841524	-0.0605198	-0.277939	22	0
A_09_P032136	euchromatic gene	-0.208087	-0.136175	-0.229391	21	0
A_09_P032151	euchromatic gene	-0.447257	0.215816	0.151295	22	0
A_09_P032201	euchromatic gene	0.173276	-0.200287	-0.202049	15	0
A_09_P032206	euchromatic gene	-0.321296	-0.00875794	0.0990458	35	0
A_09_P032211	euchromatic gene	-0.3589	0.0943266	0.156491	17	0
A_09_P032231	euchromatic gene	-0.229323	0.267589	0.0670466	9	0.3058
A_09_P032241	euchromatic gene	-0.545678	-0.322224	0.0145055	18	0
A_09_P032246	euchromatic gene	-0.320304	0.0948477	-0.0414851	14	0
A_09_P032261	euchromatic gene	-0.291806	-0.7311	-0.298134	14	0
A_09_P032266	euchromatic gene	-0.387949	0.333548	0.468471	9	0
A_09_P032276	euchromatic gene	-0.259921	0.0765697	-0.179294	22	0
A_09_P032346	euchromatic gene	-0.0105916	-0.0804255	-0.0868999	14	0
A_09_P032351	euchromatic gene	-0.0556651	-0.19154	-0.277836	12	0
A_09_P032356	euchromatic gene	-0.132888	0.0425771	-0.0705608	14	0
A_09_P032361	euchromatic gene	0.0228294	-0.131562	-0.105122	21	0.6116
A_09_P032391	euchromatic gene	-0.196261	-0.00859159	0.0765217	11	0
A_09_P032396	euchromatic gene	-0.308583	0.0871972	-0.145239	14	0
A_09_P032416	euchromatic gene	-0.50336	0.131362	0.17021	18	0
A_09_P032421	euchromatic gene	-0.333889	0.190345	0.134183	18	0
A_09_P032426	euchromatic gene	-0.0970932	0.0346996	-0.177837	20	0.3058
A_09_P032471	euchromatic gene	-0.0399642	-0.0458864	-0.0643424	21	0
A_09_P032486	euchromatic gene	-0.106536	-0.0807034	-0.0521456	13	0
A_09_P032496	euchromatic gene	-0.497636	0.0986654	0.611169	12	0
A_09_P032521	euchromatic gene	-0.234604	0.0028907	-0.0157271	21	0
A_09_P032616	euchromatic gene	-0.278743	0.179434	0.0809644	16	0
A_09_P032641	euchromatic gene	-0.108158	-0.113202	-0.174153	22	0
A_09_P032651	euchromatic gene	-0.197294	-0.173332	-0.0668102	13	0
A_09_P032716	euchromatic gene	-0.295189	0.1891	0.0945092	17	0
A_09_P032751	euchromatic gene	-0.0178561	-0.183413	-0.128056	19	0.3058
A_09_P032756	euchromatic gene	-0.193904	0.0617793	0.0240713	12	0
A_09_P032786	euchromatic gene	-0.195382	-0.00808978	-0.0928795	17	0
A_09_P032796	euchromatic gene	-0.274584	-0.0337311	0.0187647	16	0
A_09_P032816	euchromatic gene	-0.421594	0.161397	0.229349	23	0
A_09_P032821	euchromatic gene	-0.263588	0.178287	0.298934	27	0.3058
A_09_P032826	euchromatic gene	-0.326708	0.0636368	0.0774532	23	0
A_09_P032831	euchromatic gene	0.0162958	-0.101586	-0.15117	20	0
A_09_P032846	euchromatic gene	-0.200821	0.00698062	0.161483	23	0
A_09_P032866	euchromatic gene	0.618275	-0.14578	-0.233755	12	0
A_09_P032876	euchromatic gene	-0.420833	1.19877	0.477468	22	0
A_09_P032901	euchromatic gene	-0.416943	0.113114	-0.130028	22	0
A_09_P032911	euchromatic gene	-0.283837	0.114779	0.0568648	15	0
A_09_P032916	euchromatic gene	-0.0925941	-0.0283647	-0.145198	14	0
A_09_P032921	euchromatic gene	-0.184896	0.13162	0.0928495	18	0
A_09_P032936	euchromatic gene	0.059345	-0.0322992	-0.202064	21	0
A_09_P032941	euchromatic gene	-0.149713	0.155817	0.0576532	18	0
A_09_P033036	euchromatic gene	-0.143406	0.195312	-0.0341172	22	0
A_09_P033096	euchromatic gene	-1.34712	0.144147	1.04361	16	0
A_09_P033201	euchromatic gene	0.000627475	-0.267532	-0.410798	12	0
A_09_P033206	euchromatic gene	-0.21609	-0.00326427	-0.215791	26	0.917399
A_09_P033226	euchromatic gene	-0.0347086	-0.694148	-0.267435	21	0.3058
A_09_P041066	euchromatic gene	-0.302955	0.155657	-0.0064946	24	0
A_09_P041086	euchromatic gene	-0.181936	-0.097525	-0.21739	19	0
A_09_P041166	euchromatic gene	-0.299516	0.0390615	-0.0903855	21	0
A_09_P041171	euchromatic gene	-0.135617	-0.0526829	-0.0852214	0	0.3058
A_09_P041176	euchromatic gene	-0.210113	0.0804451	-0.0233428	11	0
A_09_P041186	euchromatic gene	-0.170524	0.0715676	-0.0742034	18	0
A_09_P041193	euchromatic gene	-0.0785166	-0.157374	-0.187893	12	0
A_09_P041201	euchromatic gene	-0.0564904	0.0667719	0.0174339	22	0
A_09_P041226	euchromatic gene	-0.254359	0.147471	0.117868	19	0
A_09_P041291	euchromatic gene	-0.320665	0.0020702	-0.0947118	18	1.2232
A_09_P041316	euchromatic gene	-0.0131404	-0.465536	-0.156039	15	0
A_09_P041341	euchromatic gene	-0.114638	-0.23106	0.00777637	18	0
A_09_P041376	euchromatic gene	-0.221248	0.107676	-0.156982	33	0
A_09_P041396	euchromatic gene	-0.0760919	-0.163943	-0.198476	19	0
A_09_P041441	euchromatic gene	-0.22248	-0.0700128	-0.214636	27	0
A_09_P041451	euchromatic gene	-0.125831	-2.22597	0.0381832	17	0
A_09_P041456	euchromatic gene	-0.0426327	0.122044	-0.0491308	33	0
A_09_P041506	euchromatic gene	-0.219618	-0.844608	-0.42309	13	0
A_09_P041511	euchromatic gene	-0.0600495	-0.0609158	-0.229151	16	0
A_09_P041516	euchromatic gene	-0.197029	0.155425	-0.0204176	25	0
A_09_P041526	euchromatic gene	-0.117386	0.0245711	-0.0587107	17	0
A_09_P041561	euchromatic gene	-0.256521	0.0143657	0.200431	14	0
A_09_P041571	euchromatic gene	-0.199842	0.0698361	-0.162836	14	0
A_09_P041601	euchromatic gene	-0.539813	-1.52832	-0.566756	25	0
A_09_P041646	euchromatic gene	-0.316728	0.195028	0.115806	21	0.3058
A_09_P041651	euchromatic gene	-0.417066	-0.192418	0.121446	23	0
A_09_P041666	euchromatic gene	-0.44953	0.161623	0.234683	30	0
A_09_P041681	euchromatic gene	-0.176789	0.108473	-0.00509769	12	0
A_09_P041686	euchromatic gene	-0.154033	0.0730613	-0.14144	22	0
A_09_P041691	euchromatic gene	-0.426124	-0.0911887	0.299157	12	0
A_09_P041706	euchromatic gene	-0.369762	0.177354	-0.03157	22	0
A_09_P041711	euchromatic gene	-1.23831	0.168804	0.37937	0	0
A_09_P041721	euchromatic gene	-0.18699	0.0712868	-0.0506296	12	0.3058
A_09_P041746	euchromatic gene	-0.296641	0.108742	-0.0708249	19	0
A_09_P041761	euchromatic gene	-0.0855636	0.0170947	-0.130601	14	0
A_09_P041821	euchromatic gene	-0.375099	0.243174	-0.0651877	6	0
A_09_P041831	euchromatic gene	-0.240823	0.16609	-0.0257471	17	0
A_09_P041856	euchromatic gene	-0.255356	0.193828	0.089564	15	0.3058
A_09_P041881	euchromatic gene	-0.323635	0.220738	0.0961454	13	0.3058
A_09_P041886	euchromatic gene	-0.162889	0.11671	-0.10582	16	0
A_09_P041891	euchromatic gene	-0.139163	0.103124	0.122525	14	0
A_09_P041896	euchromatic gene	-0.18806	0.0933103	0.0236133	28	0
A_09_P041911	euchromatic gene	-0.285808	0.238318	0.205825	14	0
A_09_P041926	euchromatic gene	-0.0876262	0.051965	-0.094314	18	0
A_09_P041946	euchromatic gene	-0.339017	0.00733727	0.0449796	13	0
A_09_P041991	euchromatic gene	-0.21685	0.282337	0.0673647	31	0
A_09_P041996	euchromatic gene	-0.0647154	-0.011936	-0.229598	18	0
A_09_P042011	euchromatic gene	-0.0816798	0.122614	0.127788	21	0
A_09_P042041	euchromatic gene	0.347693	-0.288552	-0.313168	17	0
A_09_P042056	euchromatic gene	-0.282605	0.16366	0.0707027	23	0
A_09_P042066	euchromatic gene	-0.156325	-0.0641255	-0.170022	15	0
A_09_P042106	euchromatic gene	-0.0297321	-0.210095	-0.12692	22	0
A_09_P042151	euchromatic gene	-0.582413	0.251499	0.091697	14	0
A_09_P042176	euchromatic gene	0.000196905	-0.803011	-0.277217	11	0
A_09_P042251	euchromatic gene	-0.50124	0.410467	0.338649	26	0
A_09_P042261	euchromatic gene	0.148526	-0.0938189	-0.144616	17	0
A_09_P042351	euchromatic gene	-0.267625	0.138872	-0.0181023	14	0
A_09_P042361	euchromatic gene	0.220517	0.160938	-0.239799	21	0.917399
A_09_P042411	euchromatic gene	-0.357066	0.182888	0.337772	16	0
A_09_P042446	euchromatic gene	-0.043275	-0.232231	-0.0986329	17	0
A_09_P042451	euchromatic gene	-0.338899	0.104863	0.114147	33	0
A_09_P042461	euchromatic gene	-0.362547	0.128955	-0.0283832	23	0
A_09_P042486	euchromatic gene	-0.13773	-0.0729229	-0.0689203	22	0
A_09_P042501	euchromatic gene	0.00796518	-0.17066	-0.0201063	11	0
A_09_P042511	euchromatic gene	-0.125199	-0.0749105	-0.241124	15	0
A_09_P042561	euchromatic gene	-0.0262624	0.152942	-0.0610928	25	0
A_09_P042591	euchromatic gene	-0.21696	0.00534908	-0.191215	21	0
A_09_P042596	euchromatic gene	-0.287496	0.100081	0.127485	22	0.3058
A_09_P042611	euchromatic gene	-0.100041	0.0112721	-0.184811	16	0
A_09_P042626	euchromatic gene	-0.139698	0.203869	0.0780213	35	0
A_09_P042671	euchromatic gene	0.216839	-0.0569034	-0.142964	27	0
A_09_P042676	euchromatic gene	-0.143572	0.0803919	-0.0379821	19	0
A_09_P042716	euchromatic gene	-0.0565681	-0.0810938	-0.191978	8	0.3058
A_09_P042946	euchromatic gene	-0.212553	-0.0400397	-0.137806	24	0
A_09_P042956	euchromatic gene	-0.0659895	-0.0334119	-0.218231	24	0
A_09_P043091	euchromatic gene	-0.158545	0.0825355	-0.00456919	26	0
A_09_P043096	euchromatic gene	-0.907832	0.289806	0.704148	9	0.3058
A_09_P043101	euchromatic gene	-0.895334	0.104633	0.106918	5	0
A_09_P043106	euchromatic gene	-0.265092	0.026136	0.0956443	25	0
A_09_P043111	euchromatic gene	0.0393652	-0.146665	0.0811344	19	0.3058
A_09_P043116	euchromatic gene	-0.0247203	0.00831776	-0.0593038	12	0.3058
A_09_P043121	euchromatic gene	0.0459071	-0.174725	-0.188284	16	0
A_09_P043126	euchromatic gene	-0.257909	0.126608	-0.0717607	22	0
A_09_P043131	euchromatic gene	-0.32776	0.177669	0.0774733	7	0
A_09_P043136	euchromatic gene	-0.371772	0.0710898	0.0282123	15	0
A_09_P043141	euchromatic gene	-0.200129	-0.797537	-0.428204	1	0
A_09_P043146	euchromatic gene	0.10202	-1.09499	-0.500807	17	0
A_09_P043151	euchromatic gene	-0.21157	-0.287605	-0.106068	11	0.6116
A_09_P043156	euchromatic gene	-0.451673	-0.0351207	-0.0482686	26	0
A_09_P043161	euchromatic gene	-0.536821	-0.124127	0.100392	15	0
A_09_P043166	euchromatic gene	-0.418159	0.0254571	0.184411	24	0
A_09_P043171	euchromatic gene	-0.265917	-1.09382	-0.078129	10	0
A_09_P043176	euchromatic gene	-0.197135	-0.189521	-0.148927	21	0
A_09_P043181	euchromatic gene	-0.393658	0.0484616	0.20033	18	0
A_09_P043186	euchromatic gene	-0.144961	-0.110427	-0.111091	18	0
A_09_P043191	euchromatic gene	-0.4892	0.168194	0.0855367	17	0
A_09_P043196	euchromatic gene	-0.249993	0.128319	0.132618	17	0
A_09_P043206	euchromatic gene	-0.254066	-0.0744418	-0.0238462	17	0
A_09_P043211	euchromatic gene	-0.197391	0.0696492	0.00427073	18	0
A_09_P043216	euchromatic gene	-0.127576	0.152309	-0.0975331	20	0
A_09_P043226	euchromatic gene	-0.038581	-0.29755	-0.278234	8	0
A_09_P043296	euchromatic gene	0.088615	-0.575747	-0.367441	48	0
A_09_P043301	euchromatic gene	0.0389611	-0.257384	-0.180989	21	0
A_09_P043311	euchromatic gene	-0.224156	0.203864	-0.0460729	24	0
A_09_P043346	euchromatic gene	-0.0408151	-1.24008	-0.890779	29	0
A_09_P043366	euchromatic gene	-0.190332	0.625625	0.0028385	11	0.3058
A_09_P043441	euchromatic gene	-0.953842	0.613837	1.1841	21	0.6116
A_09_P043511	euchromatic gene	-0.102847	0.0756501	0.0278493	9	0
A_09_P043516	euchromatic gene	-0.106614	-0.0102121	-0.11079	15	0
A_09_P043576	euchromatic gene	-0.321113	0.172079	0.158002	19	0
A_09_P043701	euchromatic gene	-0.374665	0.267104	0.161739	30	0
A_09_P043706	euchromatic gene	-0.164406	0.179376	0.082455	24	0
A_09_P043761	euchromatic gene	-0.276992	0.184094	0.418055	19	0
A_09_P043836	euchromatic gene	-0.353159	0.145331	-0.00300126	15	0
A_09_P043851	euchromatic gene	-0.284609	0.0491415	-0.0421386	12	0.3058
A_09_P043861	euchromatic gene	0.0516051	-0.10556	-0.0918718	20	0
A_09_P043866	euchromatic gene	-0.262528	0.166256	0.0511833	18	0
A_09_P043871	euchromatic gene	-0.0164516	-0.272284	-0.171689	13	0
A_09_P043906	euchromatic gene	-0.0768033	-0.0709872	-0.144214	5	0
A_09_P043911	euchromatic gene	-0.286858	0.134051	-0.130239	23	0
A_09_P043916	euchromatic gene	-0.263615	0.0477679	-0.0290557	27	0
A_09_P043956	euchromatic gene	-0.0772917	-0.121115	-0.303881	21	0
A_09_P044006	euchromatic gene	-0.400677	0.106142	0.177664	15	0.6116
A_09_P044061	euchromatic gene	-0.430588	0.13068	0.412958	19	0.6116
A_09_P044086	euchromatic gene	-0.145971	-0.0589639	-0.116363	14	0
A_09_P044221	euchromatic gene	0.023001	-0.0662901	-0.202105	25	0.3058
A_09_P044226	euchromatic gene	-0.349693	0.259899	0.12787	10	0
A_09_P044246	euchromatic gene	-0.0794146	-0.023758	-0.195392	14	0
A_09_P044311	euchromatic gene	-0.271418	0.162136	0.0537962	16	0
A_09_P044356	euchromatic gene	0.0270278	-0.135785	0.026921	17	0
A_09_P044376	euchromatic gene	-0.437822	0.222648	0.253161	22	0
A_09_P044406	euchromatic gene	-0.363035	0.230412	-0.0570801	9	0
A_09_P044451	euchromatic gene	0.183243	-0.390689	-0.413043	27	0.3058
A_09_P044476	euchromatic gene	-0.224578	-0.0849938	-0.127642	17	0
A_09_P044521	euchromatic gene	-0.197857	0.120683	0.203358	28	0
A_09_P044531	euchromatic gene	-0.103381	-0.0594728	-0.0889071	18	0
A_09_P044586	euchromatic gene	-0.148097	0.152022	0.0949108	19	0
A_09_P044636	euchromatic gene	-0.303777	-0.406112	-0.564074	14	0
A_09_P044696	euchromatic gene	-0.238384	-0.00405436	0.0106167	16	0
A_09_P044771	euchromatic gene	-0.192436	0.132483	-0.0537347	17	0
A_09_P044791	euchromatic gene	-0.144339	-0.0681229	-0.167824	12	0.3058
A_09_P044801	euchromatic gene	-0.266176	-0.7955	-0.390178	17	0
A_09_P044851	euchromatic gene	-0.374903	0.298448	0.0134519	20	0
A_09_P044856	euchromatic gene	-0.190066	-0.0220228	0.0209812	12	0
A_09_P044971	euchromatic gene	-0.200601	-0.0707658	-0.0696643	27	0
A_09_P045041	euchromatic gene	0.1348	-0.174775	-0.15474	14	0
A_09_P045151	euchromatic gene	-0.346515	0.0482997	0.1017	22	0
A_09_P045171	euchromatic gene	-0.146476	-0.0889105	-0.0792977	24	0.3058
A_09_P045216	euchromatic gene	-0.141563	0.0344755	0.241489	20	0.3058
A_09_P045266	euchromatic gene	-0.104411	0.0266705	-0.127781	20	0
A_09_P045286	euchromatic gene	-0.134502	-0.188076	-0.218532	19	0
A_09_P045301	euchromatic gene	-0.261553	0.173124	0.0763037	19	0
A_09_P045371	euchromatic gene	-0.111765	0.0391304	-0.196315	23	0.3058
A_09_P045416	euchromatic gene	-0.223961	0.164727	0.0390697	20	0
A_09_P045571	euchromatic gene	-0.0285021	-0.0150685	-0.0351133	17	0
A_09_P045581	euchromatic gene	-0.210885	0.0651552	0.0686451	9	0.917399
A_09_P045626	euchromatic gene	-0.229386	0.226175	0.210796	21	0
A_09_P045701	euchromatic gene	-0.28516	0.160618	-0.0465373	17	0
A_09_P045726	euchromatic gene	0.273941	-0.206221	-0.293648	21	0
A_09_P045756	euchromatic gene	-0.0307052	-0.141827	0.180084	14	0
A_09_P045811	euchromatic gene	-0.125412	-0.679859	-0.811112	21	0.3058
A_09_P045886	euchromatic gene	-0.313679	0.0514467	0.0866892	17	0
A_09_P045896	euchromatic gene	-0.173433	0.0225786	-0.0866679	20	0
A_09_P045941	euchromatic gene	-0.400395	0.0993314	0.0838411	12	0
A_09_P045976	euchromatic gene	-0.38289	-0.0710526	-0.00919061	5	0
A_09_P046011	euchromatic gene	-0.0824629	-0.0179747	-0.00318915	17	0
A_09_P046026	euchromatic gene	-0.483898	0.139862	0.129638	21	0.3058
A_09_P046071	euchromatic gene	-0.107085	0.0278307	-0.0456205	16	0
A_09_P046081	euchromatic gene	-0.260564	-0.0823099	0.0683324	17	0
A_09_P046086	euchromatic gene	-0.847949	0.518153	0.482818	20	0
A_09_P046096	euchromatic gene	-0.493365	0.272245	0.485951	28	0
A_09_P046206	euchromatic gene	-0.00352862	-0.135452	-0.209753	53	0
A_09_P046346	euchromatic gene	0.00486003	-0.201371	-0.134384	26	0
A_09_P046351	euchromatic gene	-0.10699	0.0834556	0.119766	22	0.3058
A_09_P046356	euchromatic gene	-0.289945	0.0377064	0.00801683	16	0
A_09_P046371	euchromatic gene	0.0325163	-0.0729001	-0.349755	29	0
A_09_P046376	euchromatic gene	-0.0968688	-1.62501	-0.610214	14	0
A_09_P046381	euchromatic gene	-0.0261051	-2.56112	-0.909389	19	0
A_09_P046436	euchromatic gene	-0.161034	-0.0780923	0.0833505	50	0
A_09_P046461	euchromatic gene	-0.125228	-0.0461137	-0.237769	24	0
A_09_P046476	euchromatic gene	-0.188706	-0.0402761	-0.0894623	9	0.917399
A_09_P046546	euchromatic gene	-0.13813	0.196675	-0.0215827	20	0
A_09_P046581	euchromatic gene	-0.441768	0.0445173	0.0559261	12	0
A_09_P046791	euchromatic gene	-0.110744	0.0976025	-0.068999	23	0
A_09_P046821	euchromatic gene	-0.205661	0.162639	0.140672	20	0
A_09_P046831	euchromatic gene	-0.382646	0.244849	0.142643	3	0
A_09_P046841	euchromatic gene	-0.0897146	0.112264	-0.0589873	20	0
A_09_P046876	euchromatic gene	-0.277304	0.0759268	1.69913	20	0.3058
A_09_P046921	euchromatic gene	-0.0147842	0.0936939	-0.158274	28	0
A_09_P046956	euchromatic gene	-0.0139606	-0.0538321	-0.146663	19	0
A_09_P046966	euchromatic gene	-0.261055	0.0539648	0.244087	26	0.3058
A_09_P046976	euchromatic gene	0.0514174	-0.125089	-0.009652	11	0
A_09_P047006	euchromatic gene	-0.155922	0.0809792	-0.00108364	22	0
A_09_P047196	euchromatic gene	-0.198494	-0.139357	-0.278171	21	0
A_09_P047281	euchromatic gene	-0.00892027	-0.0141012	-0.232909	14	0
A_09_P047286	euchromatic gene	-0.0596659	-0.0810299	-0.0772225	14	0
A_09_P047366	euchromatic gene	0.130698	-0.518898	-0.230241	23	0
A_09_P047376	euchromatic gene	-0.465346	0.100436	0.11403	31	0.6116
A_09_P047386	euchromatic gene	-0.340014	0.0771355	0.125141	20	0
A_09_P047431	euchromatic gene	-0.0862547	0.167103	-0.15304	22	0
A_09_P047466	euchromatic gene	-0.157451	-1.25684	-0.515401	12	0
A_09_P047576	euchromatic gene	-0.0278514	0.0486216	0.161008	27	0
A_09_P047591	euchromatic gene	-0.159288	-0.0217391	-0.0620151	11	0
A_09_P047601	euchromatic gene	-0.0442778	-0.00672093	-0.0888928	16	0
A_09_P047646	euchromatic gene	-0.322731	0.120043	0.173873	18	0
A_09_P047666	euchromatic gene	-0.0980542	0.0253816	-0.0456974	7	0
A_09_P047751	euchromatic gene	-0.025923	-0.388543	-0.366215	24	0.3058
A_09_P047756	euchromatic gene	-0.197592	0.0104374	0.081004	23	0
A_09_P047781	euchromatic gene	-0.306075	0.27196	0.236414	12	0
A_09_P047846	euchromatic gene	0.219887	-0.495799	-0.355526	13	0
A_09_P047851	euchromatic gene	-0.2674	0.157946	0.0199084	15	0
A_09_P047856	euchromatic gene	-0.563886	0.334279	0.464841	22	0
A_09_P047881	euchromatic gene	-0.0813736	0.0920405	-0.0549137	27	0
A_09_P047911	euchromatic gene	-0.273549	0.213564	0.120846	17	0
A_09_P047976	euchromatic gene	-0.319644	0.0547087	-0.021684	17	0
A_09_P048101	euchromatic gene	-0.202668	0.204716	0.481693	22	0
A_09_P048111	euchromatic gene	-0.278612	-0.184007	0.0378612	22	0
[truncated: 35,992 more rows]
