# Supplementary material for: Mapping the pericentric heterochromatin by comparative genomic hybridization analysis and chromosome deletions in Drosophila melanogaster
Source: HighWire-hosted journal article supplement (doi:10.1101/gr.137406.112), 2012-06-28
Supplement: Supplemental_Table_7-List_of_polytenized_H-probes.xlsx [file Supplemental_Table_7-List_of_polytenized_H-probes.xlsx]

## Sheet: Sheet1
Probe ID	Class	Map (Global)	Map (Regional)	Sequence Category	Cycle14 embryo	Salivary gland	Ovary
>contig10067|size93|read24|cov9.17_1270	Novel	3Cen	3Cen	non-TE non-Satellite	0.0350019	-0.301224	-0.171705
>contig10115|size74|read16|cov7.65_9106	Novel	3Cen	3Cen	non-TE non-Satellite	0.0561226	-0.131672	-0.113902
>contig1036|size141|read62|cov15.54_53320	Novel	2L	2L	non-TE non-Satellite	-0.135417	-0.112446	0.0544627
>contig10419|size338|read91|cov9.36_233355	Novel	3Cen	3Cen	non-TE non-Satellite	-0.130113	-0.0201045	-0.221283
>contig10532|size84|read15|cov6.39_1440	Novel	X	Xn	non-TE non-Satellite	-0.18703	-0.248625	-0.229574
>contig1061|size546|read323|cov20.66_4318	Novel	X	Xn	non-TE non-Satellite	-0.220431	0.128984	-0.0725956
>contig10655|size61|read14|cov8.05_1540	Novel	3Cen	3Cen	non-TE non-Satellite	-1.39	0.412374	0.430297
>contig10759|size60|read18|cov10.75_0617	Novel	3Cen	3Cen	TE	0.452604	-0.459653	-0.364345
>contig1078|size279|read110|cov14.04_11316	Novel	Y	XY	non-TE non-Satellite	0.068447	-0.254722	-0.338335
>contig10816|size92|read27|cov10.14_12669	Novel	X	Xn	non-TE non-Satellite	-0.0771255	-0.589167	-0.174993
>contig11098|size60|read10|cov5.75_0894	Novel	3Cen	3Cen	non-TE non-Satellite	0.0189536	-0.0502603	-0.243743
>contig1118|size81|read29|cov12.75_7970	Novel	Y	XY	non-TE non-Satellite	-0.00769794	-0.234765	-0.231335
>contig11705|size204|read92|cov15.29_2028	Novel	Y	XY	non-TE non-Satellite	-0.016948	-0.315328	-0.341319
>contig11705|size204|read92|cov15.29_241393	Novel	Y	XY	non-TE non-Satellite	-0.272599	-0.162144	-0.0123363
>contig11705|size204|read92|cov15.29_2727	Novel	Y	XY	non-TE non-Satellite	-0.308084	-0.0265144	-0.00489234
>contig11823|size469|read171|cov12.78_2731475	Novel	X	Xn	non-TE non-Satellite	-0.0279506	-0.372426	-0.0973659
>contig1207|size171|read81|cov16.36_431671	Novel	Y	XY	non-TE non-Satellite	-0.567615	0.520212	0.336903
>contig12164|size102|read37|cov12.77_421747	Novel	2Cen	2CEN	non-TE non-Satellite	0.227088	-0.167132	0.307801
>contig12282|size83|read29|cov12.53_91839	Novel	Y	XY	non-TE non-Satellite	-0.00279334	-0.203167	-0.329798
>contig12891|size70|read17|cov8.71_42319	Novel	2L	2L	non-TE non-Satellite	-0.107648	-0.591593	-0.213668
>contig12937|size84|read19|cov7.25_102352	Novel	3Cen	3Cen	non-TE non-Satellite	-0.106995	-0.249288	-0.45924
>contig12941|size85|read25|cov9.59_252356	Novel	2Cen	2Rn	non-TE non-Satellite	0.00111402	-0.569898	0.119733
>contig13379|size61|read12|cov6.95_12681	Novel	Y	XY	non-TE non-Satellite	-0.0472775	-0.160924	-0.231099
>contig13535|size114|read37|cov11.37_242800	Novel	2L	2L	non-TE non-Satellite	-0.131732	-0.00447471	-0.0762917
>contig13748|size82|read20|cov8.65_142951	Novel	3Cen	3Cen	TE	-0.103066	-0.273043	-0.159082
>contig13979|size75|read16|cov7.57_13115	Novel	3Cen	3Cen	non-TE non-Satellite	-0.243145	0.145194	0.1126
>contig14119|size77|read26|cov11.84_03206	Novel	X	Xn	non-TE non-Satellite	-0.0552765	-0.256134	-0.145414
>contig14469|size73|read20|cov9.75_113444	Novel	3Cen	3Cen	non-TE non-Satellite	-0.0557739	-0.108122	-0.167721
>contig14591|size100|read17|cov5.99_183531	Novel	2L	2L	TE	-0.204073	0.0357811	0.100557
>contig15334|size66|read18|cov9.56_34035	Novel	2Cen	2Rn	non-TE non-Satellite	0.025875	-0.0049997	0.0682356
>contig15420|size85|read26|cov10.34_164099	Novel	3Cen	3Cen	non-TE non-Satellite	-0.0770856	0.0555506	-0.0996853
>contig15493|size87|read24|cov9.41_74152	Novel	X	Xn	non-TE non-Satellite	0.102321	-0.0491063	-0.227836
>contig15500|size64|read15|cov8.33_34157	Novel	Y	XY	non-TE non-Satellite	-0.213152	0.0434318	0.299172
>contig15895|size89|read28|cov11.20_264436	Novel	2Cen	2CEN	non-TE non-Satellite	-0.187952	-0.507093	-0.249421
>contig15923|size79|read25|cov11.19_104448	Novel	Y	XY	non-TE non-Satellite	0.372814	-0.383964	-0.401541
>contig15956|size60|read12|cov7.18_04465	Novel	3Cen	3Cen	non-TE non-Satellite	-0.129844	-0.0508635	-0.071178
>contig16124|size66|read14|cov7.61_64594	Novel	Y	XY	non-TE non-Satellite	-0.0457347	0.0647368	-0.061994
>contig16580|size88|read27|cov10.83_214903	Novel	X	Xn	non-TE non-Satellite	0.0394122	-0.222282	0.362121
>contig16607|size72|read22|cov10.97_94921	Novel	2L	2L	non-TE non-Satellite	-0.16281	-0.068569	-0.160924
>contig17285|size73|read20|cov8.75_75354	Novel	3L	3L	non-TE non-Satellite	-0.0590949	0.0500005	0.000986617
>contig17404|size105|read22|cov7.06_405432	Novel	Y	XY	non-TE non-Satellite	-0.0998421	0.0841135	-0.321891
>contig17434|size170|read45|cov9.46_385452	Novel	Y	XY	non-TE non-Satellite	-0.0203457	0.131384	-0.0484605
>contig17446|size99|read20|cov7.06_375464	Novel	Y	XY	non-TE non-Satellite	0.0897389	-0.012718	0.380655
>contig17534|size83|read35|cov13.80_115523	Novel	3Cen	3Cen	non-TE non-Satellite	-0.301085	0.124045	0.423458
>contig1779|size89|read34|cov13.72_115697	Novel	Y	XY	non-TE non-Satellite	-0.0396221	-0.0709973	-0.129778
>contig18072|size66|read11|cov5.67_65867	Novel	3Cen	3Cen	non-TE non-Satellite	-0.171671	-0.0356968	-0.0584056
>contig18352|size86|read15|cov5.91_136064	Novel	Y	XY	non-TE non-Satellite	-0.157986	0.0268128	0.0713679
>contig18491|size77|read14|cov6.19_76151	Novel	3Cen	3Cen	non-TE non-Satellite	0.0140249	-0.155167	0.022123
>contig1859|size165|read27|cov5.69_596230	Novel	Y	XY	non-TE non-Satellite	0.104218	-0.391449	-0.304619
>contig1871|size309|read107|cov12.36_1916316	Novel	2L	2L	non-TE non-Satellite	-0.108171	-0.171192	0.0856969
>contig1871|size309|read107|cov12.36_19394	Novel	2L	2L	non-TE non-Satellite	-0.202012	-0.0510625	0.13151
>contig18899|size99|read19|cov6.70_186431	Novel	X	Xn	non-TE non-Satellite	-0.225382	-0.161243	0.0162047
>contig19344|size240|read91|cov13.41_666719	Novel	X	Xn	non-TE non-Satellite	-0.196832	-0.415478	-0.170936
>contig1953|size66|read16|cov8.68_16838	Novel	X	Xn	non-TE non-Satellite	0.0836214	-0.516757	-0.304329
>contig19538|size61|read11|cov6.46_06836	Novel	3Cen	3Cen	TE	0.0952691	-0.333271	-0.161365
>contig1985|size143|read61|cov14.76_207037	Novel	Y	XY	non-TE non-Satellite	-0.200082	-0.0262778	-0.0940334
>contig20196|size79|read25|cov11.37_187239	Novel	Y	XY	non-TE non-Satellite	-0.0764462	-0.397752	-0.683971
>contig20202|size86|read17|cov6.93_167240	Novel	3Cen	3Cen	non-TE non-Satellite	0.0480464	-0.111876	-0.11117
>contig20293|size71|read15|cov7.55_107296	Novel	X	Xn	non-TE non-Satellite	-0.0168109	-0.0595038	-0.151041
>contig20464|size89|read27|cov10.67_237409	Novel	3Cen	3Cen	non-TE non-Satellite	-0.113022	0.127454	0.0858839
>contig2080|size225|read95|cov14.91_1447614	Novel	X	Xn	non-TE non-Satellite	0.0838266	-0.0653481	-0.404962
>contig20827|size65|read10|cov5.38_57631	Novel	2Cen	2CEN	non-TE non-Satellite	-0.428344	-0.325196	0.0199828
>contig21486|size69|read18|cov9.04_38055	Novel	3L	3L	non-TE non-Satellite	-0.244355	0.068436	-0.0284801
>contig21781|size61|read13|cov6.85_08237	Novel	3Cen	3Cen	non-TE non-Satellite	0.00211046	0.0412167	-0.0384117
>contig2182|size78|read40|cov17.74_28260	Novel	Y	XY	non-TE non-Satellite	0.168151	-0.102394	-0.219078
>contig22250|size63|read21|cov11.65_38494	Novel	X	Xn	non-TE non-Satellite	0.11282	-0.160318	-0.0444787
>contig22483|size74|read16|cov7.51_148643	Novel	3L	3L	non-TE non-Satellite	-0.0846402	0.0556131	-0.0404351
>contig2267|size79|read24|cov10.38_98766	Novel	Y	XY	non-TE non-Satellite	-0.0781513	-0.46384	-0.231381
>contig22852|size96|read20|cov7.36_228860	Novel	X	Xn	non-TE non-Satellite	-0.259114	0.0921672	-0.0771986
>contig22911|size137|read42|cov10.91_248904	Novel	2L	2L	non-TE non-Satellite	-0.207834	0.166457	0.132338
>contig23461|size97|read33|cov12.06_269242	Novel	Y	XY	non-TE non-Satellite	-0.0107376	-0.457841	-0.210514
>contig23464|size123|read22|cov6.24_519244	Novel	3Cen	3Cen	non-TE non-Satellite	-0.216099	0.0750419	0.163921
>contig2361|size118|read37|cov10.94_449331	Novel	Y	XY	non-TE non-Satellite	0.257525	-0.292953	-0.0670783
>contig2398|size151|read72|cov16.68_819557	Novel	Y	XY	non-TE non-Satellite	-0.208067	0.0109038	0.104342
>contig24194|size79|read16|cov6.15_129679	Novel	3Cen	3Cen	non-TE non-Satellite	-0.00704509	0.0865031	0.191174
>contig24789|size72|read22|cov9.47_1210052	Novel	3L	3L	non-TE non-Satellite	-1.2183	0.114052	1.05685
>contig24886|size107|read51|cov16.97_1310109	Novel	2L	2L	non-TE non-Satellite	-0.0230914	-0.152912	-0.274346
>contig25086|size64|read10|cov5.62_110213	Novel	3Cen	3Cen	non-TE non-Satellite	-0.153587	0.0507912	0.141694
>contig25354|size94|read39|cov14.55_1110371	Novel	Y	XY	non-TE non-Satellite	-0.0822035	-0.0623513	-0.12314
>contig25768|size95|read29|cov10.93_2710591	Novel	2Cen	2Rn	non-TE non-Satellite	-0.279116	-0.380648	-0.411662
>contig25872|size77|read15|cov5.95_010645	Novel	3Cen	3Cen	TE	-0.375306	-0.130811	-0.120015
>contig26054|size69|read15|cov7.62_710742	Novel	3Cen	3Cen	non-TE non-Satellite	-0.103919	0.0621326	0.0580563
>contig26405|size88|read15|cov5.81_310931	Novel	3Cen	3Cen	non-TE non-Satellite	-0.0314089	0.0457788	0.0386275
>contig26446|size104|read28|cov9.62_4210955	Novel	Y	XY	non-TE non-Satellite	0.307782	-0.327876	-0.331614
>contig26671|size84|read22|cov9.32_1711075	Novel	3Cen	3Cen	non-TE non-Satellite	-0.131788	-0.0353955	0.0722782
>contig26883|size62|read17|cov9.40_011209	Novel	Y	XY	non-TE non-Satellite	-0.0561978	-0.323248	-0.0405144
>contig27036|size73|read14|cov6.70_311299	Novel	3Cen	3Cen	non-TE non-Satellite	0.226801	-0.19682	-0.251898
>contig27040|size78|read20|cov8.95_411303	Novel	X	Xn	non-TE non-Satellite	0.200454	-0.406237	-0.384688
>contig2711|size70|read11|cov5.56_011346	Novel	2L	2L	TE	-0.15319	0.082924	-0.0199938
>contig27419|size78|read19|cov8.72_1811513	Novel	2L	2L	non-TE non-Satellite	-0.158981	-0.270805	-0.0352326
>contig27484|size84|read15|cov6.13_1511554	Novel	3L	3L	non-TE non-Satellite	-0.20486	-0.0259411	0.058142
>contig2758|size62|read13|cov7.31_211612	Novel	3Cen	3Cen	TE	0.0173401	-0.367292	-0.30522
>contig28081|size61|read12|cov6.93_111898	Novel	3Cen	3Cen	non-TE non-Satellite	0.027934	-0.384634	-0.0686468
>contig28180|size60|read40|cov21.82_011950	armU/Uextra	2R	2R6	non-TE non-Satellite	-0.402736	0.258954	0.156381
>contig28623|size85|read21|cov8.49_312191	Novel	X	Xn	non-TE non-Satellite	-0.277648	-0.078111	0.221026
>contig28647|size71|read17|cov8.49_012203	Novel	3Cen	3Cen	non-TE non-Satellite	-0.0916361	-0.0471649	0.247633
>contig28964|size82|read18|cov7.50_212385	Novel	X	Xn	non-TE non-Satellite	-0.116735	0.0584392	0.246791
>contig2914|size330|read157|cov16.82_85188	Novel	2L	2L	non-TE non-Satellite	-0.124374	0.0762979	-0.090311
>contig2925|size111|read46|cov14.69_4012538	Novel	Y	XY	non-TE non-Satellite	-0.219633	0.0166484	-0.0284252
>contig29366|size89|read28|cov10.81_1012597	Novel	Y	XY	non-TE non-Satellite	0.0776816	-0.226889	-0.438418
>contig29749|size68|read18|cov9.40_512808	Novel	Y	XY	non-TE non-Satellite	0.210881	-0.1269	-0.471746
>contig29867|size78|read15|cov6.67_1312864	Novel	3Cen	3Cen	non-TE non-Satellite	-0.0956331	-0.143037	-0.133986
>contig2998|size157|read40|cov9.00_5512937	Novel	2L	2L	non-TE non-Satellite	-0.369639	0.086897	-0.119717
>contig30104|size71|read13|cov6.31_512994	Novel	3Cen	3Cen	non-TE non-Satellite	-0.0882273	0.0920689	0.314518
>contig30500|size66|read12|cov6.39_613191	Novel	3Cen	3Cen	Satellite	-0.716475	-0.569838	0.372529
>contig30911|size73|read13|cov6.08_013394	Novel	X	Xn	TE	-0.114501	-0.0259657	-0.0635457
>contig31470|size88|read20|cov8.11_1213698	Novel	3Cen	3Cen	non-TE non-Satellite	-1.57605	0.127195	0.531586
>contig31703|size72|read16|cov7.51_513824	Novel	2Cen	2CEN	non-TE non-Satellite	0.230949	0.0469176	0.043291
>contig31744|size60|read10|cov5.95_013849	Novel	3Cen	3Cen	non-TE non-Satellite	-0.155919	-0.504183	-0.280983
>contig31764|size96|read16|cov5.62_2213863	Novel	2Cen	2Rn	non-TE non-Satellite	-0.471808	-0.135147	0.222391
>contig32030|size69|read11|cov5.68_013997	Novel	3Cen	3Cen	non-TE non-Satellite	-1.40368	0.417516	0.370971
>contig32400|size143|read55|cov13.77_3114199	Novel	Y	XY	non-TE non-Satellite	0.00661367	-0.0187136	-0.261033
>contig32591|size63|read12|cov6.73_214298	Novel	2Cen	2CEN	non-TE non-Satellite	-0.285553	-0.360919	-0.195461
>contig32771|size81|read26|cov11.49_1214387	Novel	2L	2L	non-TE non-Satellite	-0.394248	0.167872	0.0623124
>contig3368|size86|read37|cov15.35_1014855	Novel	X	Xn	non-TE non-Satellite	0.115491	-0.235417	-0.132393
>contig3374|size799|read378|cov16.57_35414887	Novel	2L	2L	non-TE non-Satellite	-0.0828045	-0.0148379	-0.0565655
>contig3374|size799|read378|cov16.57_354245	Novel	2L	2L	non-TE non-Satellite	0.0449864	-0.174888	-0.13412
>contig3374|size799|read378|cov16.57_376244	Novel	2L	2L	non-TE non-Satellite	-0.107961	-0.0785818	-0.0192355
>contig3374|size799|read378|cov16.57_393243	Novel	2L	2L	non-TE non-Satellite	-0.16675	-0.00142384	0.0696548
>contig3379|size130|read49|cov12.93_2714909	Novel	Y	XY	non-TE non-Satellite	-0.195963	0.0850222	-0.188215
>contig33833|size99|read28|cov9.81_3714929	Novel	X	Xn	non-TE non-Satellite	0.113655	-0.243288	-0.381743
>contig34226|size80|read17|cov7.22_815110	Novel	3Cen	3Cen	non-TE non-Satellite	-0.26313	0.146533	0.219688
>contig34277|size82|read16|cov6.99_315137	Novel	3Cen	3Cen	non-TE non-Satellite	-0.269794	0.147511	0.13101
>contig34539|size65|read14|cov7.15_315270	Novel	X	Xn	non-TE non-Satellite	-0.181728	-0.0736608	0.204468
>contig3462|size85|read18|cov7.12_1115314	Novel	Y	XY	non-TE non-Satellite	-0.412527	-0.0752945	0.0689863
>contig3467|size70|read11|cov5.63_715337	Novel	3Cen	3Cen	non-TE non-Satellite	0.0985176	-0.0682447	-0.0145019
>contig34671|size85|read25|cov10.51_715334	Novel	Y	XY	non-TE non-Satellite	-0.284694	0.2927	0.0531185
>contig34873|size108|read27|cov8.76_4715433	Novel	Y	XY	non-TE non-Satellite	0.092104	-0.311186	-0.227348
>contig3512|size70|read24|cov10.86_015562	Novel	3L	3L	Satellite	-1.11661	0.447977	1.02908
>contig3527|size122|read32|cov9.36_615636	Novel	2Cen	2Rn	non-TE non-Satellite	-0.242618	-0.42964	-0.498179
>contig35613|size95|read27|cov9.18_515811	Novel	3Cen	3Cen	non-TE non-Satellite	-0.0539656	0.0203822	0.0948006
>contig35730|size62|read10|cov5.61_115857	Novel	2Cen	2R4	non-TE non-Satellite	-0.137088	-0.430622	-0.126168
>contig3596|size95|read38|cov14.34_1215978	Novel	2L	2L	non-TE non-Satellite	-0.129543	-0.226575	-0.179451
>contig36056|size106|read35|cov11.10_4616020	Novel	3Cen	3Cen	non-TE non-Satellite	0.0760753	-0.162394	-0.286125
>contig36923|size63|read10|cov5.43_316398	Novel	3Cen	3Cen	non-TE non-Satellite	-0.459122	-0.0312375	0.0658701
>contig37238|size89|read20|cov7.98_1116545	Novel	3L	3L	Satellite	-0.977097	-0.105158	0.485084
>contig37269|size70|read10|cov5.13_016557	Novel	3Cen	3Cen	non-TE non-Satellite	-0.279451	0.106352	0.134011
>contig37457|size115|read44|cov12.85_016651	Novel	3Cen	3Cen	non-TE non-Satellite	-0.165497	0.0286553	0.351911
>contig38295|size78|read14|cov5.74_1516978	Novel	3Cen	3Cen	TE	0.127217	-0.277859	-0.151063
>contig38326|size94|read15|cov5.66_3016990	Novel	3L	3L	non-TE non-Satellite	-1.26745	0.12928	0.955942
>contig38456|size91|read17|cov6.44_2017044	Novel	3Cen	3Cen	non-TE non-Satellite	0.40195	-0.544677	-0.57955
>contig3867|size133|read32|cov8.59_917130	Novel	2Cen	2CEN	non-TE non-Satellite	0.488551	-0.397012	0.0542354
>contig39389|size65|read17|cov9.20_517398	Novel	3L	3L	Satellite	-1.12689	0.0992565	1.23981
>contig3982|size87|read26|cov10.71_1417588	Novel	3Cen	3Cen	non-TE non-Satellite	-1.49999	0.0720445	0.424442
>contig39836|size68|read12|cov6.04_817589	Novel	3Cen	3Cen	non-TE non-Satellite	-0.0355615	-0.0725934	0.0802708
>contig4010|size302|read154|cov18.20_10017689	Novel	2L	2L	non-TE non-Satellite	0.167627	-0.209113	-0.219801
>contig4010|size302|read154|cov18.20_100268	Novel	2L	2L	non-TE non-Satellite	-0.166953	0.121223	-0.0601811
>contig4086|size81|read22|cov9.26_1117983	Novel	2Cen	2CEN	non-TE non-Satellite	0.231646	-0.251375	0.373918
>contig41959|size106|read33|cov10.61_3218412	Novel	Y	XY	non-TE non-Satellite	-0.0997649	-0.0708606	0.0132189
>contig42031|size64|read10|cov5.59_018432	Novel	Y	XY	non-TE non-Satellite	0.361773	-0.582959	-0.276464
>contig43100|size80|read25|cov11.14_2018812	Novel	Y	XY	non-TE non-Satellite	0.398949	-0.587996	-0.649872
>contig44027|size82|read13|cov5.56_319126	Novel	3Cen	3Cen	TE	0.08228	-0.306606	-0.121376
>contig44422|size65|read10|cov5.34_019273	Novel	3Cen	3Cen	TE	0.0119837	-0.277846	0.0378637
>contig4526|size82|read19|cov8.28_1019557	Novel	Y	XY	non-TE non-Satellite	0.0577959	-0.2445	-0.476618
>contig45404|size65|read16|cov8.25_519598	Novel	Y	XY	non-TE non-Satellite	-0.0981545	0.0117405	0.396447
>contig4637|size181|read75|cov14.72_3519937	Novel	X	Xn	non-TE non-Satellite	0.0896411	0.0209917	-0.04641
>contig46998|size112|read18|cov5.64_220142	Novel	Y	XY	non-TE non-Satellite	0.314184	-0.585515	-0.449524
>contig4701|size62|read17|cov9.08_120149	Novel	X	Xn	non-TE non-Satellite	0.0994653	-0.218574	-0.285007
>contig4736|size123|read47|cov13.59_2120265	Novel	2L	2L	non-TE non-Satellite	-0.462924	-0.117099	-0.13519
>contig48063|size80|read14|cov6.26_920479	Novel	3Cen	3Cen	non-TE non-Satellite	0.0967994	-0.175127	-0.0657014
>contig48115|size80|read21|cov9.04_520496	Novel	X	Xn	non-TE non-Satellite	-0.175918	0.0223474	-0.12158
>contig48146|size65|read18|cov9.51_320504	Novel	Y	XY	non-TE non-Satellite	0.398867	-0.2578	-0.588692
>contig48798|size110|read23|cov7.45_420699	Novel	Y	XY	non-TE non-Satellite	0.0902011	-0.0548686	-0.180881
>contig4978|size76|read15|cov7.04_921015	Novel	3L	3L	non-TE non-Satellite	-0.201642	0.100763	0.0577118
>contig50110|size69|read11|cov5.52_721129	Novel	3Cen	3Cen	non-TE non-Satellite	-0.0554513	0.0390212	-0.0241623
>contig50175|size82|read20|cov8.70_1721148	Novel	Y	XY	non-TE non-Satellite	0.135414	-0.338009	-0.15874
>contig50656|size71|read11|cov5.55_021304	Novel	Y	XY	non-TE non-Satellite	-0.176943	-0.51735	-0.205233
>contig5158|size102|read22|cov7.74_1521580	Novel	Y	XY	non-TE non-Satellite	0.14667	-0.0401005	-0.174621
>contig51937|size60|read9|cov5.18_021681	Novel	3Cen	3Cen	TE	0.0599498	-0.145217	0.0187828
>contig52785|size77|read15|cov6.75_1721916	Novel	Y	XY	non-TE non-Satellite	-0.258988	0.138614	0.14911
>contig5412|size152|read33|cov7.62_1122255	Novel	3Cen	3Cen	non-TE non-Satellite	0.102832	0.0819396	0.130576
>contig5443|size137|read42|cov10.81_1422347	Novel	2L	2L	non-TE non-Satellite	0.0161672	0.00692972	-0.0461846
>contig55230|size80|read16|cov7.10_1922544	Novel	3Cen	3Cen	non-TE non-Satellite	0.0685032	-0.0398825	-0.0779136
>contig55436|size96|read29|cov10.76_3622606	Novel	2L	2L	TE	-0.0129032	-0.175564	-0.371409
>contig5618|size88|read19|cov7.41_1922813	Novel	3Cen	3Cen	non-TE non-Satellite	-0.0625458	-0.168962	-0.15616
>contig56181|size61|read10|cov5.64_022812	Novel	X	Xn	non-TE non-Satellite	-0.0903623	-0.037124	0.296212
>contig5648|size144|read62|cov14.85_5322880	Novel	Y	XY	non-TE non-Satellite	-0.146862	-0.143685	-0.0551559
>contig5655|size230|read71|cov10.80_3222894	Novel	X	Xn	non-TE non-Satellite	0.025516	-0.0295589	-0.0290559
>contig57756|size73|read14|cov6.30_223179	Novel	Y	XY	non-TE non-Satellite	0.187798	-0.170684	-0.10648
>contig5994|size93|read23|cov8.87_423705	Novel	Y	XY	non-TE non-Satellite	-0.327858	0.170907	0.140695
>contig59972|size74|read15|cov7.27_023708	Novel	3Cen	3Cen	non-TE non-Satellite	-0.286156	-0.126169	0.0588362
>contig61472|size77|read12|cov5.52_424017	Novel	3Cen	3Cen	non-TE non-Satellite	0.0879413	-0.103587	-0.0554835
>contig61995|size92|read21|cov7.97_224115	Novel	Y	XY	non-TE non-Satellite	-0.157202	-0.00387897	0.0100438
>contig63045|size74|read11|cov5.23_1324367	Novel	X	Xn	non-TE non-Satellite	-0.164068	-0.271605	0.0905955
>contig63295|size63|read10|cov5.57_324412	Novel	3Cen	3Cen	non-TE non-Satellite	-0.0277884	-0.0547125	-0.0964907
>contig6382|size229|read74|cov11.42_2424519	Novel	X	Xn	non-TE non-Satellite	-0.081136	0.00535258	-0.0244273
>contig642|size78|read25|cov11.18_924629	Novel	3Cen	3Cen	non-TE non-Satellite	0.103106	-0.233663	-0.119293
>contig6515|size76|read17|cov7.34_624802	Novel	3Cen	3Cen	non-TE non-Satellite	-1.2229	0.430441	0.291235
>contig6637|size88|read22|cov8.57_2125032	Novel	X	Xn	non-TE non-Satellite	0.0176747	-0.373074	-0.0949433
>contig6681|size92|read34|cov12.73_325109	Novel	X	Xn	non-TE non-Satellite	-0.0170013	-0.143054	0.171138
>contig6690|size111|read41|cov12.89_3525120	Novel	Y	XY	non-TE non-Satellite	-0.162621	0.140262	-0.0956979
>contig6802|size69|read14|cov7.23_925333	Novel	3Cen	3Cen	non-TE non-Satellite	-0.104012	-0.0584159	0.0241166
>contig69039|size80|read14|cov6.03_1425484	Novel	3Cen	3Cen	non-TE non-Satellite	0.0102454	0.0596831	0.0100205
>contig70439|size70|read12|cov5.96_925695	Novel	3Cen	3Cen	TE	-0.136125	-0.0147887	-0.0310645
>contig7100|size89|read31|cov11.89_2425782	Novel	Y	XY	non-TE non-Satellite	0.335439	-0.400189	-0.204669
>contig7105|size72|read27|cov13.33_625789	Novel	2L	2L	TE	0.101766	-0.32933	-0.408344
>contig71601|size69|read11|cov5.70_625878	Novel	3L	3L	Satellite	-2.13855	1.68535	3.58881
>contig7263|size229|read62|cov9.63_12626018	Novel	Y	XY	non-TE non-Satellite	-0.0127545	-0.143632	-0.325027
>contig7818|size194|read67|cov12.06_11126665	Novel	2L	2L	non-TE non-Satellite	-0.256917	0.0282991	0.0736738
>contig7829|size107|read31|cov9.92_326678	Novel	Y	XY	non-TE non-Satellite	-0.110249	0.182726	0.0351024
>contig7838|size137|read27|cov7.08_4626687	Novel	Y	XY	non-TE non-Satellite	-0.101083	0.107833	-0.0405716
>contig7899|size75|read31|cov14.41_126750	Novel	3Cen	3Cen	TE	-0.0280749	-0.365894	-0.32266
>contig81217|size71|read14|cov6.87_626981	Novel	3Cen	3Cen	non-TE non-Satellite	-0.0710077	-0.100075	-0.0429719
>contig8124|size73|read12|cov5.64_1226985	Novel	Y	XY	non-TE non-Satellite	-0.521845	-0.197853	0.493636
>contig8127|size79|read18|cov7.68_1426988	Novel	Y	XY	non-TE non-Satellite	0.0345082	-0.377189	-0.413385
>contig8353|size235|read111|cov16.76_19433	Novel	2L	2L	non-TE non-Satellite	-0.0752779	-0.104204	-0.129039
>contig8353|size235|read111|cov16.76_4727197	Novel	2L	2L	non-TE non-Satellite	-0.353223	-0.329611	-0.264978
>contig8353|size235|read111|cov16.76_47431	Novel	2L	2L	non-TE non-Satellite	-0.20507	-0.586163	-0.448899
>contig8361|size117|read25|cov7.61_3427205	Novel	X	Xn	non-TE non-Satellite	-0.158355	0.138137	0.180365
>contig8577|size75|read14|cov6.69_227381	Novel	3L	3L	Satellite	-0.991724	-0.471331	0.382554
>contig8743|size75|read29|cov13.01_027531	Novel	3Cen	3Cen	non-TE non-Satellite	-0.493775	0.310349	0.176825
>contig879|size101|read40|cov14.14_2127576	Novel	Y	XY	non-TE non-Satellite	0.228175	-0.154717	-0.144286
>contig8845|size65|read14|cov7.72_027618	Novel	Y	XY	non-TE non-Satellite	-0.0991333	-0.404797	-0.0968146
>contig8979|size75|read15|cov6.99_1027731	Novel	3Cen	3Cen	non-TE non-Satellite	-0.0621974	-0.0908293	-0.142975
>contig911|size95|read38|cov13.85_727844	Novel	Y	XY	non-TE non-Satellite	-0.101417	0.00254193	-0.0322625
>contig9271|size64|read20|cov11.02_027973	Novel	X	Xn	non-TE non-Satellite	0.0484148	0.0202487	-0.196726
>contig9383|size95|read38|cov13.94_3428076	Novel	Y	XY	non-TE non-Satellite	-0.291697	0.0967517	0.0226988
>contig9670|size148|read35|cov8.33_3028325	Novel	Y	XY	non-TE non-Satellite	-0.222958	0.191078	0.294042
>contig9696|size70|read21|cov10.71_228350	Novel	Y	XY	non-TE non-Satellite	-0.266067	0.321673	0.296218
>contig9717|size66|read17|cov9.20_028367	Novel	3Cen	3Cen	non-TE non-Satellite	0.0267553	-0.154899	-0.0939001
>contig9815|size139|read75|cov18.94_2628449	Novel	X	Xn	non-TE non-Satellite	0.25177	-0.370378	-0.383918
>contig9820|size77|read16|cov7.32_328457	Novel	3Cen	3Cen	non-TE non-Satellite	0.114506	-0.448281	-0.371164
>contig9957|size75|read17|cov8.13_028564	Novel	Y	XY	non-TE non-Satellite	0.0286531	0.00459836	-0.176582
>contig9970|size337|read138|cov14.25_15528579	Novel	X	Xn	non-TE non-Satellite	-0.104283	0.114788	0.217994
>contig9987|size93|read26|cov9.92_2728595	Novel	Y	XY	non-TE non-Satellite	0.0834341	-0.0662017	-0.221592
nw>contig10126|size221|read229|cov38.33_4710	armHet	2R	2R6	non-TE non-Satellite	-0.183018	-0.217225	-0.260469
nw>contig10129|size117|read24|cov9.76_4367	armHet	3R	3R	non-TE non-Satellite	-0.437531	0.214923	0.232492
nw>contig10151|size529|read320|cov22.56_39114	armHet	2Cen	2R2	non-TE non-Satellite	-0.122726	-0.0960671	-0.114436
nw>contig10155|size107|read22|cov10.42_3778	armU/Uextra	3Cen	3Cen	TE	0.133723	-0.498507	-0.252579
nw>contig10175|size289|read65|cov10.30_5890	armHet	X	X4	non-TE non-Satellite	0.0581656	-0.339511	-0.0618437
nw>contig10236|size107|read23|cov10.50_42123	armHet	3L	3L	non-TE non-Satellite	-0.29915	-0.484274	-0.13132
nw>contig10259|size227|read166|cov28.00_7922	armHet	2Cen	2R6	non-TE non-Satellite	0.0736944	-0.533387	-0.412415
nw>contig10323|size262|read72|cov13.24_196161	armHet	3R	3R	non-TE non-Satellite	-0.162473	0.0197566	0.202535
nw>contig10350|size376|read156|cov19.17_137178	armU/Uextra	3Cen	3Cen	non-TE non-Satellite	-0.188613	-0.068438	-0.0962998
nw>contig10385|size610|read170|cov13.10_347200	armHet	3R	3R	TE	-0.219809	-0.306423	-0.0721965
nw>contig10399|size467|read497|cov38.98_10430	armHet	2R	2R6	non-TE non-Satellite	-0.372956	0.180702	0.151485
nw>contig10480|size737|read464|cov23.58_52137	armHet	2Cen	2R2	non-TE non-Satellite	-0.14105	-0.141558	-0.124548
nw>contig10587|size177|read36|cov10.00_77296	armHet	3L	3L	non-TE non-Satellite	-0.335185	-0.399379	0.14732
nw>contig10702|size99|read22|cov9.99_30354	armU/Uextra	3Cen	3Cen	non-TE non-Satellite	0.0632043	-0.543488	-0.422676
nw>contig10775|size512|read359|cov26.06_19160	armHet	2Cen	2R2	non-TE non-Satellite	-0.0538982	-0.0495863	-0.185774
nw>contig10803|size111|read23|cov10.04_28402	armHet	3L	3L	TE	-0.0297201	-0.510252	-0.0703654
nw>contig10870|size286|read293|cov39.03_14369	armHet	2Cen	2R2	non-TE non-Satellite	0.0824459	-0.134794	-0.0142778
nw>contig10884|size537|read98|cov8.70_328436	armHet	3Cen	3Cen	non-TE non-Satellite	-0.130155	-0.0250466	-0.0321524
nw>contig10923|size144|read43|cov14.56_28456	armU/Uextra	3Cen	3Cen	TE	0.140655	-0.469308	-0.338553
nw>contig10926|size418|read122|cov13.73_355457	armHet	3R	3R	non-TE non-Satellite	0.040899	-0.135052	0.00688515
nw>contig10966|size82|read15|cov9.01_2474	armHet	X	X4	TE	-0.0735419	-0.163924	0.396613
nw>contig11024|size195|read295|cov55.59_481	armU/Uextra	3Cen	3Cen	TE	0.104076	-0.358491	-0.171448
nw>contig11038|size248|read75|cov13.81_138503	armU/Uextra	3Cen	3Cen	non-TE non-Satellite	-0.331539	-0.210276	-0.349595
nw>contig11076|size1535|read914|cov22.63_30887	armHet	2Cen	2R2	non-TE non-Satellite	-0.227136	-0.0277356	0.113677
nw>contig11159|size191|read41|cov10.53_108561	armU/Uextra	3Cen	3Cen	non-TE non-Satellite	-0.0746509	-0.0849162	-0.0143294
nw>contig11171|size147|read37|cov12.04_45569	armU/Uextra	3Cen	3Cen	non-TE non-Satellite	-0.0557173	-0.146224	-0.320295
nw>contig1125|size299|read245|cov39.09_239610	armHet	3R	3R	non-TE non-Satellite	-0.0887138	-0.562833	-0.0608098
nw>contig11324|size125|read39|cov13.71_3649	armHet	3Cen	3Cen	non-TE non-Satellite	-0.139156	-0.161146	-0.190115
nw>contig11354|size1147|read801|cov26.05_754113	armHet	2R	2R5	non-TE non-Satellite	-0.20405	-0.478959	-0.0573278
nw>contig11376|size117|read97|cov30.86_2120	armHet	2Cen	2CEN	TE	-0.0722921	-0.537918	-0.418238
nw>contig11391|size153|read102|cov25.24_56121	armU/Uextra	Y	XY	TE	-0.0918123	-0.334348	-0.19139
nw>contig11397|size368|read96|cov12.30_196691	armHet	X	X4	non-TE non-Satellite	0.0216951	-0.315149	-0.00383068
nw>contig11454|size89|read16|cov9.12_25728	armHet	3Cen	3Cen	TE	-0.231078	-0.0955702	-0.0670727
nw>contig11472|size1414|read834|cov22.11_985123	armHet	2R	2R6	non-TE non-Satellite	-0.196423	-0.046645	-0.183895
nw>contig11483|size189|read176|cov33.35_28125	armHet	2Cen	2R2	non-TE non-Satellite	-0.11542	-0.221735	-0.158617
nw>contig11528|size561|read172|cov14.40_497767	armHet	3Cen	3Cen	non-TE non-Satellite	-0.309288	0.106885	-0.0154397
nw>contig11531|size126|read89|cov25.71_44129	armHet	2R	2R6	TE	-0.157299	-0.0417715	-0.0737282
nw>contig11581|size298|read95|cov15.27_157787	armHet	3L	3L	non-TE non-Satellite	-0.160477	-0.416163	-0.0630584
nw>contig11632|size432|read115|cov12.51_172805	armHet	X	X4	non-TE non-Satellite	-0.202952	0.0147663	0.444135
nw>contig11645|size423|read79|cov8.70_153814	armHet	3Cen	3Cen	non-TE non-Satellite	-0.170202	-0.0553825	0.0473401
nw>contig11654|size102|read105|cov39.78_28140	armHet	2Cen	2Rn	TE	0.257437	-0.257183	-0.134023
nw>contig11672|size111|read21|cov8.22_44827	armHet	3L	3L	TE	-0.175995	-0.567466	-0.0688696
nw>contig11693|size100|read103|cov38.52_27143	armHet	2R	2R6	non-TE non-Satellite	-0.152704	0.216058	0.227533
nw>contig11695|size168|read98|cov22.08_78144	armHet	2R	2R5	non-TE non-Satellite	-0.301145	-0.529907	0.0671106
nw>contig11729|size394|read410|cov39.14_257149	armHet	2Cen	2R2	non-TE non-Satellite	-0.0692101	-0.215743	-0.15822
nw>contig11768|size131|read38|cov13.34_1871	armHet	3R	3R	non-TE non-Satellite	0.0117448	-0.3192	-0.352303
nw>contig11901|size310|read198|cov23.83_24159	armHet	2R	2R5	non-TE non-Satellite	-0.225305	-0.446796	0.147274
nw>contig11903|size842|read895|cov39.19_284160	armU/Uextra	2Cen	2R4	non-TE non-Satellite	-0.166736	-0.139025	0.0192629
nw>contig11935|size237|read47|cov9.76_53922	armHet	3R	3R	non-TE non-Satellite	-0.103077	-0.100604	-0.105912
nw>contig12010|size520|read109|cov9.89_0946	armHet	3R	3R	non-TE non-Satellite	-0.229382	-0.471624	-0.226992
nw>contig12016|size135|read25|cov8.97_69949	armHet	3Cen	3Cen	non-TE non-Satellite	-0.370719	0.106846	0.0295385
nw>contig12071|size113|read105|cov36.20_17172	armHet	2Cen	2R2	non-TE non-Satellite	-0.0358569	-0.260113	-0.0970333
nw>contig12124|size433|read438|cov37.31_318175	armHet	2R	2R6	non-TE non-Satellite	-0.0594895	-0.0828284	-0.187977
nw>contig12139|size310|read169|cov20.65_226178	armU/Uextra	2Cen	2R4	non-TE non-Satellite	-0.320662	-0.144383	0.060678
nw>contig1214|size317|read582|cov83.93_107995	armU/Uextra	3Cen	3Cen	TE	0.0289762	-0.078017	0.0416665
nw>contig12169|size1415|read898|cov23.58_747182	armHet	2R	2R6	non-TE non-Satellite	-0.164605	0.0652817	-0.0559108
nw>contig12206|size124|read77|cov22.26_1188	armU/Uextra	2R	2R6	non-TE non-Satellite	-0.153595	0.0411189	-0.035791
nw>contig12242|size200|read51|cov12.37_481032	armHet	X	X4	TE	0.115318	-0.184114	0.0582984
nw>contig12252|size164|read37|cov10.63_91036	armHet	3Cen	3Cen	non-TE non-Satellite	-0.197639	0.111379	-0.0149082
nw>contig12255|size137|read24|cov8.57_731038	armHet	3Cen	3Cen	non-TE non-Satellite	-0.254401	0.210231	0.110619
nw>contig12272|size109|read18|cov8.25_331043	Novel	3L	3L	Satellite	-1.4721	0.515053	1.34057
nw>contig12311|size132|read25|cov8.68_401057	armHet	3L	3L	non-TE non-Satellite	-0.0604249	-0.0984579	-0.0842537
nw>contig12345|size411|read74|cov8.45_1021070	armHet	3Cen	3Cen	non-TE non-Satellite	-0.093197	-0.0771142	-0.107395
nw>contig12414|size158|read40|cov12.35_961091	armU/Uextra	3Cen	3Cen	TE	-0.076754	-0.209484	-0.191611
nw>contig12526|size252|read50|cov9.75_611130	armHet	3L	3L	non-TE non-Satellite	-0.238598	0.156923	0.135054
nw>contig12533|size101|read24|cov10.61_21133	armHet	3Cen	3Cen	non-TE non-Satellite	-0.175094	-0.0201601	0.130743
nw>contig12652|size1321|read805|cov22.77_284219	armHet	2Cen	2R2	non-TE non-Satellite	-0.318451	-0.298254	-0.162036
nw>contig12679|size237|read139|cov22.45_125223	armHet	2Cen	2R2	non-TE non-Satellite	-0.312465	0.0481725	0.0947037
nw>contig12783|size96|read55|cov20.50_4230	armHet	2R	2R2	non-TE non-Satellite	-0.19481	-0.292948	-0.0142581
nw>contig12822|size553|read139|cov11.88_11236	armHet	X	X4	non-TE non-Satellite	-0.157726	-0.0638739	0.156762
nw>contig12893|size801|read494|cov22.86_578238	armHet	2R	2R6	non-TE non-Satellite	-0.216708	-0.0694366	0.0320129
nw>contig12927|size1506|read863|cov21.95_1277239	armHet	2R	2R6	non-TE non-Satellite	-0.142808	0.178842	0.00663401
nw>contig13018|size116|read71|cov23.22_47248	armHet	2Cen	2Rn	non-TE non-Satellite	0.0599862	-0.242121	-0.32203
nw>contig13025|size191|read36|cov8.92_511305	armHet	3L	3L	non-TE non-Satellite	-0.189896	-0.406019	-0.00203674
nw>contig13049|size76|read14|cov8.46_11318	armHet	3Cen	3Cen	TE	-0.168367	-0.20997	-0.0807869
nw>contig13092|size153|read154|cov37.86_23255	armHet	2Cen	2R2	non-TE non-Satellite	-0.0958987	-0.593636	-0.2728
nw>contig13306|size83|read22|cov12.31_111413	Novel	X	Xn	non-TE non-Satellite	-0.0998589	-0.172528	0.161458
nw>contig13318|size918|read613|cov24.84_524278	armHet	2R	2R6	non-TE non-Satellite	-0.307305	0.17545	0.0734008
nw>contig13367|size134|read27|cov9.60_171442	Novel	3Cen	3Cen	non-TE non-Satellite	-0.130358	0.00171898	0.0186967
nw>contig13419|size209|read37|cov8.33_611462	armHet	3R	3R	non-TE non-Satellite	0.056751	-0.09428	-0.0900284
nw>contig13506|size340|read82|cov11.31_1291500	armU/Uextra	3Cen	3Cen	non-TE non-Satellite	-0.0611114	0.12893	-0.00368066
nw>contig13508|size81|read18|cov10.63_201501	Novel	3L	3L	Satellite	-0.941992	-0.561124	0.297363
nw>contig13515|size324|read182|cov20.63_205293	armHet	2R	2R5	non-TE non-Satellite	-0.265081	-0.458107	-0.0169473
nw>contig13533|size154|read127|cov30.29_39294	armHet	2Cen	2R2	non-TE non-Satellite	-0.0824947	-0.372306	-0.155813
nw>contig13557|size389|read98|cov12.32_1681518	armHet	3L	3L	non-TE non-Satellite	-0.0956883	-0.483702	-0.183902
nw>contig13596|size209|read204|cov36.25_75297	armHet	2R	2R6	non-TE non-Satellite	-0.274288	0.171303	0.150171
nw>contig13896|size390|read96|cov11.81_1791634	armHet	X	X4	non-TE non-Satellite	-0.299587	-0.0362253	0.470659
nw>contig13944|size777|read461|cov21.86_603317	armHet	2Cen	2R2	non-TE non-Satellite	-0.147714	-0.0180931	-0.0212825
nw>contig13954|size536|read161|cov14.34_3521653	armHet	X	X4	non-TE non-Satellite	-0.237883	-0.0134928	0.391279
nw>contig13992|size132|read30|cov10.48_671668	armU/Uextra	3Cen	3Cen	TE	-0.069917	-0.132309	-0.139976
nw>contig14074|size117|read21|cov8.83_241698	armU/Uextra	3Cen	3Cen	non-TE non-Satellite	-0.127814	-0.128362	-0.167412
nw>contig14083|size1885|read1228|cov24.42_287325	armHet	2R	2R6	non-TE non-Satellite	-0.349627	0.259853	0.176237
nw>contig14144|size459|read111|cov11.58_3371723	armHet	3R	3R	non-TE non-Satellite	-0.252083	-0.0928157	0.268366
nw>contig14145|size456|read265|cov21.43_1331	armHet	2R	2R6	non-TE non-Satellite	-0.0671762	-0.100244	-0.104509
nw>contig14195|size121|read24|cov9.95_421743	armHet	X	X4	non-TE non-Satellite	-0.0500025	-0.399558	0.379143
nw>contig14228|size535|read559|cov38.90_286336	armHet	2R	2R6	non-TE non-Satellite	-0.0377891	-0.299019	-0.266012
nw>contig14253|size130|read47|cov16.58_131764	armHet	3Cen	3Cen	non-TE non-Satellite	-0.0310819	-0.598033	-0.257388
nw>contig14305|size104|read97|cov34.41_29342	armU/Uextra	2Cen	2R2	TE	-0.0595129	-0.00630127	0.11957
nw>contig14320|size625|read388|cov23.54_49343	armHet	2R	2R5	non-TE non-Satellite	-0.305325	-0.408796	0.0746826
nw>contig14336|size221|read49|cov10.50_51792	armHet	3Cen	3Cen	TE	-0.134931	0.00300563	0.17119
nw>contig14355|size155|read26|cov8.37_121801	armHet	3Cen	3Cen	TE	0.457158	-0.410817	-0.443704
nw>contig14411|size109|read31|cov13.46_241819	Novel	3Cen	3Cen	non-TE non-Satellite	0.089613	-0.346065	0.0289324
nw>contig14546|size196|read126|cov23.24_133358	armHet	2Cen	2R2	non-TE non-Satellite	-0.0298559	-0.231973	-0.126594
nw>contig14684|size91|read16|cov8.22_11915	armHet	3L	3L	non-TE non-Satellite	-0.304443	-0.0844654	0.220171
nw>contig14798|size1211|read685|cov21.69_464371	armHet	2Cen	2R2	non-TE non-Satellite	-0.194006	0.0661003	0.0881394
nw>contig14814|size267|read51|cov8.72_491966	armHet	3Cen	3Cen	non-TE non-Satellite	-0.151284	0.0991458	0.179331
nw>contig14857|size97|read16|cov8.21_361977	armU/Uextra	3Cen	3Cen	Satellite	-1.58693	0.56902	1.23985
nw>contig1498|size353|read456|cov60.23_82033	armU/Uextra	3Cen	3Cen	TE	-0.0916425	-0.55247	-0.313403
nw>contig15007|size673|read185|cov12.43_4212039	armHet	3R	3R	non-TE non-Satellite	-0.0969135	-0.486666	-0.355005
nw>contig15046|size162|read160|cov39.47_20387	armU/Uextra	2Cen	2R2	TE	-0.124476	-0.160885	0.0209078
nw>contig15048|size180|read39|cov10.42_02050	armHet	3R	3R	non-TE non-Satellite	0.0339367	-0.310534	-0.143764
nw>contig15051|size73|read13|cov8.27_132052	Novel	Y	XY	non-TE non-Satellite	-0.0928416	-0.317401	0.0274944
nw>contig15056|size131|read74|cov20.68_41389	armHet	2Cen	2R2	non-TE non-Satellite	-0.203053	-0.304198	-0.0785831
nw>contig15126|size148|read33|cov10.77_142087	armHet	3Cen	3Cen	non-TE non-Satellite	-0.0595385	-0.266944	-0.219259
nw>contig15136|size321|read182|cov20.71_117394	armU/Uextra	2Cen	2R4	TE	0.0812109	-0.289743	0.00720443
nw>contig15189|size388|read74|cov9.14_2522107	armHet	3Cen	3Cen	non-TE non-Satellite	0.116218	-0.432175	-0.281904
nw>contig15323|size265|read148|cov20.78_86405	armHet	2R	2R5	TE	-0.0344597	-0.510873	-0.110864
nw>contig15349|size139|read37|cov12.76_252168	armHet	3L	3L	non-TE non-Satellite	-0.0115326	-0.580514	-0.337411
nw>contig15403|size320|read91|cov13.41_2182189	armHet	3R	3R	non-TE non-Satellite	-0.179616	-0.0737505	0.030278
nw>contig15469|size146|read101|cov25.67_84413	armHet	2R	2R6	non-TE non-Satellite	-0.129847	0.174949	0.0463154
nw>contig15524|size251|read42|cov8.22_872231	armHet	3L	3L	non-TE non-Satellite	-0.127788	-0.062071	-0.264987
nw>contig15551|size266|read48|cov8.47_2012243	armHet	3R	3R	non-TE non-Satellite	-0.0842796	-0.347362	-0.179809
nw>contig15577|size557|read155|cov12.92_3282254	armHet	3Cen	3Cen	non-TE non-Satellite	-0.0919881	-0.0524405	-0.145372
nw>contig15601|size87|read19|cov10.66_182264	armU/Uextra	3R	3R	non-TE non-Satellite	-0.179411	-0.39379	0.00795028
nw>contig15622|size99|read18|cov8.05_192274	armHet	3Cen	3Cen	non-TE non-Satellite	0.00588128	-0.291796	-0.127855
nw>contig15671|size347|read192|cov20.54_156424	armHet	2R	2R6	non-TE non-Satellite	-0.239123	0.146167	-0.0550353
nw>contig15708|size110|read73|cov24.65_18428	armU/Uextra	2Cen	2R2	non-TE non-Satellite	-0.0308112	-0.20659	0.00987295
nw>contig15770|size79|read26|cov15.92_32331	armU/Uextra	3Cen	3Cen	TE	-0.216067	-0.267	-0.00475954
nw>contig15778|size293|read54|cov9.04_502332	armHet	X	X4	TE	-0.1247	-0.00231912	0.255838
nw>contig15810|size208|read36|cov8.32_402341	armHet	3Cen	3Cen	non-TE non-Satellite	-0.020396	-0.0668821	-0.130825
nw>contig15853|size72|read38|cov20.31_0442	armHet	2Cen	2R2	non-TE non-Satellite	-0.126677	-0.459352	-0.124795
nw>contig15858|size507|read139|cov12.92_342360	armHet	X	Xn	non-TE non-Satellite	-0.292216	0.103325	0.473758
nw>contig15864|size278|read51|cov8.73_612364	armHet	3R	3R	non-TE non-Satellite	-0.00647475	-0.380163	-0.136991
nw>contig15919|size546|read192|cov16.46_2662385	armHet	3Cen	3Cen	non-TE non-Satellite	0.129268	-0.0641547	-0.161806
nw>contig1594|size574|read350|cov29.02_3492395	armU/Uextra	3Cen	3Cen	non-TE non-Satellite	-0.157987	-0.0504472	-0.213819
nw>contig1618|size491|read332|cov31.91_1542480	armU/Uextra	3Cen	3Cen	non-TE non-Satellite	-0.0751495	-0.513817	-0.321503
nw>contig16824|size330|read55|cov8.01_1512685	armHet	3Cen	3Cen	non-TE non-Satellite	0.0317913	-0.282369	-0.0980293
nw>contig16940|size86|read32|cov17.76_242739	armHet	3R	3R	non-TE non-Satellite	-0.0327418	-0.0933602	-0.218131
nw>contig16947|size414|read251|cov22.22_149503	armHet	2R	2R6	TE	-0.158871	0.12283	0.123973
nw>contig17035|size320|read67|cov9.63_2202771	armHet	3L	3L	non-TE non-Satellite	-0.208148	-0.464016	0.0057926
nw>contig17062|size600|read142|cov11.36_5362781	armHet	3Cen	3Cen	TE	0.0671815	-0.286437	-0.18043
nw>contig17199|size785|read433|cov20.28_287518	armHet	2R	2R6	non-TE non-Satellite	-0.336925	-0.108113	-0.0318686
nw>contig17239|size126|read23|cov8.26_132834	armU/Uextra	3Cen	3Cen	non-TE non-Satellite	-0.0607953	-0.0141947	-0.155724
nw>contig17244|size74|read16|cov10.38_32838	armHet	3Cen	3Cen	non-TE non-Satellite	-0.284379	0.0825528	0.0397977
nw>contig17265|size570|read334|cov21.82_306522	armHet	2Cen	2R2	non-TE non-Satellite	-0.326193	-0.123223	-0.0261864
nw>contig17319|size545|read309|cov21.59_90523	armHet	2Cen	2R2	non-TE non-Satellite	-0.0781107	-0.208038	-0.166986
nw>contig17323|size172|read136|cov29.80_59524	armHet	2Cen	2R2	non-TE non-Satellite	0.0530262	-0.426609	-0.107154
nw>contig17329|size87|read21|cov9.93_162866	armHet	3L	3L	TE	-0.0178224	-0.408326	-0.151925
nw>contig17549|size632|read344|cov20.76_444532	armHet	2R	2R5	non-TE non-Satellite	-0.101066	-0.441118	0.0121233
nw>contig17565|size119|read20|cov8.04_572945	armHet	3Cen	3Cen	non-TE non-Satellite	-0.019495	-0.309562	-0.0925615
nw>contig17583|size280|read86|cov14.78_142954	armHet	X	X4	non-TE non-Satellite	-0.179762	0.0677935	0.33099
nw>contig17636|size208|read52|cov11.67_1302973	armHet	3R	3R	non-TE non-Satellite	-0.191136	-0.0937852	0.0575676
nw>contig1764|size72|read23|cov16.29_122977	Novel	3L	3L	Satellite	-1.11366	-0.355831	0.539833
nw>contig1769|size452|read537|cov55.71_3922988	armU/Uextra	3Cen	3Cen	TE	0.00776624	-0.563451	-0.381518
nw>contig17701|size270|read82|cov13.43_1512990	armU/Uextra	3Cen	3Cen	non-TE non-Satellite	-0.117033	-0.0964159	-0.231722
nw>contig17715|size155|read30|cov8.99_632991	armHet	3R	3R	non-TE non-Satellite	-0.17743	-0.262821	0.011072
nw>contig17802|size232|read181|cov29.32_101550	armU/Uextra	2Cen	2R4	TE	-0.275186	-0.225624	0.13416
nw>contig17846|size139|read27|cov8.84_743037	armHet	3L	3L	non-TE non-Satellite	-0.281332	-0.377559	-0.0149304
nw>contig17905|size323|read64|cov9.54_393059	armHet	X	X4	non-TE non-Satellite	-0.273937	0.000465157	0.35034
nw>contig17953|size185|read40|cov10.27_213076	armHet	3L	3L	TE	-0.00755044	-0.483369	-0.120618
nw>contig18012|size448|read233|cov22.33_3503092	armHet	3R	3R	non-TE non-Satellite	0.0139004	-0.425495	-0.0715945
nw>contig18103|size351|read89|cov12.05_43126	armHet	3Cen	3Cen	non-TE non-Satellite	-0.408002	0.112399	0.148324
nw>contig18238|size84|read22|cov11.83_83177	armU/Uextra	Y	XY	TE	-0.0781553	-0.487099	-0.118677
nw>contig1839|size376|read460|cov57.69_1373236	armU/Uextra	3Cen	3Cen	TE	0.0310677	-0.164648	-0.0328821
nw>contig18396|size445|read375|cov31.70_122579	armHet	2Cen	2R2	non-TE non-Satellite	0.187763	-0.264964	-0.224811
nw>contig18401|size236|read43|cov8.36_83237	armU/Uextra	3Cen	3Cen	non-TE non-Satellite	-0.105031	-0.0457499	-0.345942
nw>contig18439|size463|read246|cov20.13_217585	armHet	2R	2R5	non-TE non-Satellite	-0.127271	-0.559658	0.0629678
nw>contig18595|size530|read140|cov12.14_33289	armHet	3R	3R	non-TE non-Satellite	-0.0975782	-0.580513	-0.531891
nw>contig18629|size99|read56|cov20.31_8601	armHet	2Cen	2R2	non-TE non-Satellite	-0.339094	-0.166651	0.00606039
nw>contig18803|size269|read151|cov21.51_117613	armHet	2Cen	2R2	non-TE non-Satellite	-0.0683328	-0.121623	-0.049491
nw>contig18807|size117|read54|cov21.31_353350	armHet	3L	3L	non-TE non-Satellite	-0.274901	-0.587762	-0.11348
nw>contig18828|size120|read65|cov20.77_49615	armU/Uextra	2Cen	2R2	non-TE non-Satellite	-0.0724508	-0.336435	-0.104718
nw>contig18889|size218|read39|cov8.26_203371	armHet	3L	3L	non-TE non-Satellite	0.068434	-0.534807	-0.415866
nw>contig19078|size118|read26|cov10.53_573432	armHet	3L	3L	non-TE non-Satellite	-0.3686	0.0923831	0.0195706
nw>contig19106|size116|read30|cov11.51_553439	armHet	3Cen	3Cen	non-TE non-Satellite	0.141955	-0.541691	-0.341927
nw>contig19155|size161|read41|cov12.07_793455	armHet	3L	3L	non-TE non-Satellite	-0.405237	-0.386415	0.0479144
nw>contig19188|size110|read18|cov8.13_113460	armHet	3L	3L	non-TE non-Satellite	-0.259618	-0.568229	-0.121455
nw>contig19234|size319|read69|cov9.93_863480	armHet	X	X4	non-TE non-Satellite	-0.159907	-0.0138713	0.32045
nw>contig19327|size201|read70|cov16.50_483508	armHet	3Cen	3Cen	non-TE non-Satellite	-0.330551	0.0503392	0.201404
nw>contig19352|size116|read28|cov11.31_113518	armHet	3Cen	3Cen	non-TE non-Satellite	-0.4358	-0.00353636	0.273044
nw>contig19701|size128|read22|cov8.00_543626	armHet	3L	3L	non-TE non-Satellite	0.0860752	-0.299192	-0.061054
nw>contig19798|size204|read118|cov21.44_35651	armHet	2Cen	2Rn	non-TE non-Satellite	0.0495062	-0.510812	-0.538358
nw>contig19799|size366|read62|cov8.21_2683656	armHet	3L	3L	non-TE non-Satellite	-0.0796567	-0.544194	-0.243816
nw>contig20010|size129|read26|cov9.78_473718	armHet	3R	3R	non-TE non-Satellite	-0.248287	0.00861178	0.0492398
nw>contig20122|size269|read46|cov8.33_1283750	armHet	3Cen	3Cen	TE	-0.124219	-0.240809	-0.0449094
nw>contig20129|size1171|read694|cov22.29_864660	armHet	2Cen	2R2	non-TE non-Satellite	-0.0836065	-0.115217	-0.0372518
nw>contig20403|size559|read168|cov14.49_3433829	armHet	X	X4	non-TE non-Satellite	-0.0753171	-0.209199	0.368531
nw>contig20471|size153|read37|cov11.63_83849	armU/Uextra	3R	3R	TE	-0.0824181	-0.207375	-0.187208
nw>contig20492|size339|read62|cov8.77_73855	armHet	3Cen	3Cen	non-TE non-Satellite	-0.015279	-0.483544	-0.0664856
nw>contig20548|size90|read17|cov9.41_13866	armHet	3R	3R	non-TE non-Satellite	-0.0704951	-0.356554	-0.0299267
nw>contig20646|size2069|read1179|cov21.71_119683	armHet	2R	2R6	non-TE non-Satellite	-0.132191	0.111394	-0.0734109
nw>contig20739|size292|read160|cov20.54_13687	armHet	2R	2R5	non-TE non-Satellite	-0.230473	-0.502771	-0.240213
nw>contig20755|size237|read56|cov10.76_1383933	armHet	3R	3R	non-TE non-Satellite	0.0339893	-0.17816	-0.152807
nw>contig20841|size164|read134|cov30.68_97689	armHet	2R	2R6	non-TE non-Satellite	-0.283806	-0.163494	-0.148733
nw>contig20885|size98|read113|cov43.03_36690	armHet	2Cen	2R2	non-TE non-Satellite	-0.263466	-0.23833	-0.0177809
nw>contig20946|size329|read323|cov37.06_87693	armU/Uextra	2Cen	2R4	non-TE non-Satellite	-0.177817	-0.291006	-0.134012
nw>contig21078|size317|read96|cov14.32_1444031	armU/Uextra	3R	3R	non-TE non-Satellite	-0.0569072	-0.403646	-0.245979
nw>contig21105|size343|read250|cov27.53_123702	armU/Uextra	2R	2R6	non-TE non-Satellite	-0.100811	0.0848723	0.0606888
nw>contig21346|size174|read131|cov27.93_111715	armU/Uextra	2Cen	2R4	non-TE non-Satellite	-0.0850851	-0.35108	-0.227825
nw>contig21409|size84|read52|cov24.36_3720	armHet	2Cen	2R2	non-TE non-Satellite	0.0736816	-0.576104	-0.251518
nw>contig21444|size81|read52|cov23.51_2726	armHet	2Cen	2R2	non-TE non-Satellite	-0.126732	-0.282566	-0.105472
nw>contig21520|size89|read16|cov8.40_44147	armHet	3Cen	3Cen	non-TE non-Satellite	0.213163	-0.139124	-0.176174
nw>contig21537|size301|read60|cov9.49_1864153	armHet	3L	3L	non-TE non-Satellite	0.00535454	-0.562073	-0.263204
nw>contig21687|size97|read19|cov9.69_34193	armHet	3R	3R	non-TE non-Satellite	-0.044244	-0.433088	-0.220585
nw>contig21701|size317|read180|cov21.46_207733	armHet	2Cen	2R2	non-TE non-Satellite	-0.313593	0.0727367	0.215848
nw>contig21714|size628|read357|cov21.64_535734	armHet	2R	2R6	non-TE non-Satellite	0.0768223	-0.14217	-0.245388
nw>contig21732|size92|read65|cov26.05_27735	armHet	2Cen	2R2	non-TE non-Satellite	-0.00757447	-0.302768	-0.148667
nw>contig21843|size122|read25|cov9.76_574226	armHet	3L	3L	non-TE non-Satellite	-0.0463121	-0.595876	-0.218811
nw>contig21852|size304|read64|cov9.63_2034228	armHet	3Cen	3Cen	non-TE non-Satellite	-0.0859791	-0.198872	0.00413659
nw>contig21938|size323|read57|cov8.19_1284251	armHet	3Cen	3Cen	non-TE non-Satellite	-0.362886	-0.0599823	-0.0167008
nw>contig21989|size108|read25|cov10.67_484269	armHet	3Cen	3Cen	non-TE non-Satellite	0.0352088	-0.244281	-0.0934088
nw>contig22351|size239|read42|cov8.47_524364	armHet	3Cen	3Cen	non-TE non-Satellite	-0.00558709	-0.0434751	-0.312223
nw>contig22646|size217|read45|cov9.47_64439	armU/Uextra	3Cen	3Cen	TE	-0.0198746	-0.318485	-0.26962
nw>contig22691|size203|read43|cov9.79_1424456	armHet	3Cen	3Cen	non-TE non-Satellite	-0.0929621	-0.132425	0.0314655
nw>contig22757|size140|read25|cov8.23_774472	armHet	3R	3R	non-TE non-Satellite	0.0352789	-0.574378	-0.706428
nw>contig23022|size207|read38|cov8.94_94555	armHet	3R	3R	non-TE non-Satellite	-0.320649	0.229804	0.140844
nw>contig23278|size408|read86|cov9.76_1004620	armHet	3Cen	3Cen	non-TE non-Satellite	0.022922	-0.12963	-0.0331107
nw>contig23913|size71|read14|cov9.51_04786	armHet	3R	3R	non-TE non-Satellite	-0.315571	-0.35011	-0.306032
nw>contig23930|size105|read23|cov9.32_224792	Novel	3Cen	3Cen	non-TE non-Satellite	0.0214911	-0.390828	-0.117357
nw>contig23933|size332|read70|cov9.47_124793	armHet	3Cen	3Cen	non-TE non-Satellite	-0.0316535	-0.277047	-0.203394
nw>contig24053|size255|read98|cov17.82_1734826	armHet	3L	3L	non-TE non-Satellite	0.0308476	-0.503585	-0.210161
nw>contig2408|size747|read2783|cov137.28_275802	armU/Uextra	2R	2R6	non-TE non-Satellite	-0.15372	0.127084	-0.060176
nw>contig24193|size613|read332|cov20.27_454806	armHet	2R	2R6	non-TE non-Satellite	-0.162318	0.0136678	-0.0403442
nw>contig24262|size112|read81|cov25.98_5809	armHet	2R	2R6	TE	-0.113817	0.066983	-0.2052
nw>contig24263|size391|read224|cov21.73_214810	armHet	2R	2R6	non-TE non-Satellite	-0.262503	0.0286969	-0.0642891
nw>contig24284|size159|read91|cov21.13_16811	armHet	2Cen	2R2	non-TE non-Satellite	-0.0258092	-0.140748	-0.104136
nw>contig24322|size122|read78|cov24.86_17812	armHet	2R	2R5	non-TE non-Satellite	0.0244267	-0.241794	-0.0913105
nw>contig2441|size243|read227|cov43.19_134913	armU/Uextra	3R	3R	non-TE non-Satellite	-0.183931	-0.418991	0.183862
nw>contig24429|size171|read31|cov8.45_194914	armHet	3Cen	3Cen	non-TE non-Satellite	-0.258674	0.233301	0.145413
nw>contig24526|size102|read23|cov10.58_304937	armHet	X	X4	non-TE non-Satellite	-0.241015	0.0496709	0.277763
nw>contig24696|size93|read22|cov10.60_264980	armHet	3R	3R	non-TE non-Satellite	-0.169204	-0.396841	-0.171038
nw>contig24718|size100|read18|cov8.45_14989	armHet	3R	3R	non-TE non-Satellite	-0.1496	0.0432923	0.0250442
nw>contig24776|size318|read177|cov20.58_34825	armHet	2R	2R6	non-TE non-Satellite	-0.305899	0.087592	-0.0119873
nw>contig24883|size113|read20|cov8.50_105022	armHet	3R	3R	non-TE non-Satellite	-0.153444	-0.191448	0.040169
nw>contig24962|size236|read170|cov26.95_163830	armHet	2Cen	2R2	non-TE non-Satellite	-0.0998616	-0.229943	-0.137381
nw>contig24989|size99|read23|cov11.74_195054	armHet	3R	3R	non-TE non-Satellite	0.0630667	-0.527542	-0.0203744
nw>contig25357|size165|read41|cov12.07_65138	armHet	3L	3L	non-TE non-Satellite	-0.26102	-0.538948	-0.124754
nw>contig25391|size196|read34|cov8.20_95151	armHet	3Cen	3Cen	non-TE non-Satellite	-0.313886	-0.100816	-0.0748932
nw>contig25607|size224|read39|cov8.72_835196	armHet	3Cen	3Cen	non-TE non-Satellite	-0.170145	0.259391	0.200446
nw>contig25689|size143|read41|cov13.55_105220	armHet	3Cen	3Cen	non-TE non-Satellite	0.076178	-0.172384	-0.164579
nw>contig25690|size94|read73|cov29.31_34851	armHet	2Cen	2R2	non-TE non-Satellite	-0.149499	-0.121074	-0.0548714
nw>contig25759|size302|read74|cov11.68_2415240	armHet	3R	3R	non-TE non-Satellite	-0.240628	-0.466819	-0.373436
nw>contig25794|size229|read40|cov8.35_595250	armHet	3L	3L	non-TE non-Satellite	-0.0194733	-0.167737	-0.00358152
nw>contig25920|size194|read38|cov9.22_255280	armHet	3R	3R	non-TE non-Satellite	-0.0941484	-0.234072	0.0299261
nw>contig26187|size149|read31|cov10.07_695356	armU/Uextra	3L	3L	non-TE non-Satellite	-0.214008	-0.562645	-0.208608
nw>contig26191|size229|read98|cov16.34_1395360	Novel	3Cen	3Cen	non-TE non-Satellite	0.162916	-0.556872	-0.111998
nw>contig2631|size241|read55|cov10.71_1795394	armHet	3L	3L	non-TE non-Satellite	-0.393774	-0.406255	0.0190976
nw>contig2635|size194|read541|cov103.30_22871	armU/Uextra	2R	2R6	non-TE non-Satellite	-0.177318	-0.0100103	-0.123545
nw>contig26397|size261|read46|cov8.04_25410	armHet	3L	3L	non-TE non-Satellite	-0.177831	-0.0347441	-0.0484212
nw>contig2640|size121|read83|cov32.93_195414	armU/Uextra	3Cen	3Cen	TE	0.0107071	-0.493786	-0.124765
nw>contig26930|size239|read138|cov21.14_66885	armHet	2R	2R6	non-TE non-Satellite	-0.448556	0.334465	0.0797889
nw>contig2706|size158|read72|cov19.38_285558	armU/Uextra	3R	3R	non-TE non-Satellite	-0.0253137	-0.403287	-0.029397
nw>contig27147|size191|read69|cov16.70_175574	armU/Uextra	Y	XY	TE	0.0369156	-0.439199	-0.396703
nw>contig2739|size226|read182|cov36.54_1385626	armHet	3R	3R	non-TE non-Satellite	0.116855	-0.371075	-0.11591
nw>contig27429|size140|read42|cov14.37_175632	armU/Uextra	3Cen	3Cen	non-TE non-Satellite	-0.180946	-0.29896	-0.193121
nw>contig27581|size229|read55|cov11.03_765662	armHet	3L	3L	non-TE non-Satellite	-0.148162	-0.426998	-0.151078
nw>contig2763|size199|read121|cov28.03_715678	armU/Uextra	3Cen	3Cen	non-TE non-Satellite	-0.0624143	-0.530059	-0.405923
nw>contig27639|size131|read24|cov8.79_85677	armHet	3Cen	3Cen	TE	-0.173712	-0.0695884	-0.173752
nw>contig28253|size94|read63|cov26.28_17922	armHet	2R	2R6	non-TE non-Satellite	-0.141837	0.117944	-0.108823
nw>contig28606|size125|read23|cov9.05_545870	armHet	3Cen	3Cen	non-TE non-Satellite	-0.257596	-0.018107	0.0761853
nw>contig28696|size88|read15|cov8.01_155891	armU/Uextra	3Cen	3Cen	non-TE non-Satellite	-0.0241393	-0.0996253	-0.14481
nw>contig28697|size91|read18|cov9.74_05892	armU/Uextra	3Cen	3Cen	non-TE non-Satellite	0.0102208	-0.197603	-0.212308
nw>contig29189|size146|read82|cov20.79_83937	armHet	2Cen	2R2	non-TE non-Satellite	0.0563531	-0.378141	-0.265134
nw>contig29537|size274|read151|cov20.64_122942	armHet	2Cen	2R2	non-TE non-Satellite	0.0209406	-0.0893661	-0.202148
nw>contig30149|size338|read205|cov22.55_151960	armHet	2Cen	2R2	non-TE non-Satellite	-0.231657	0.109863	0.151812
nw>contig30378|size189|read40|cov9.95_1246237	armHet	3Cen	3Cen	non-TE non-Satellite	-0.382115	0.0823882	0.108798
nw>contig30391|size214|read121|cov21.11_70969	armHet	2R	2R6	TE	-0.217825	-0.0122099	0.0014085
nw>contig30619|size316|read63|cov9.30_2556296	Novel	3Cen	3Cen	TE	0.158257	-0.519823	-0.288752
nw>contig3081|size131|read77|cov27.82_396338	armU/Uextra	3R	3R	TE	0.106167	-0.568807	-0.0641156
nw>contig30886|size83|read19|cov9.42_46351	armHet	3Cen	3Cen	non-TE non-Satellite	-0.239672	-0.532086	0.0778659
nw>contig30894|size311|read57|cov8.82_2496353	armHet	3Cen	3Cen	non-TE non-Satellite	-0.219106	0.0994557	0.0648311
nw>contig30994|size78|read15|cov9.44_96370	armU/Uextra	3Cen	3Cen	TE	0.0910397	-0.176698	-0.122518
nw>contig31087|size142|read29|cov9.44_116391	armHet	3L	3L	non-TE non-Satellite	-0.199127	-0.305292	0.0869295
nw>contig3128|size178|read513|cov107.53_84985	armU/Uextra	2R	2R6	TE	0.0656277	-0.174989	-0.108282
nw>contig31420|size126|read23|cov8.01_586465	armHet	3R	3R	TE	-0.198058	0.109925	-0.0142396
nw>contig31818|size235|read44|cov8.73_1476530	armHet	3Cen	3Cen	non-TE non-Satellite	-0.380694	0.166844	0.0585656
nw>contig31884|size280|read46|cov8.02_326541	armHet	3Cen	3Cen	non-TE non-Satellite	-0.279452	0.208007	0.153338
nw>contig32052|size203|read38|cov8.99_386566	armHet	3Cen	3Cen	non-TE non-Satellite	-0.299625	-0.00668292	0.179024
nw>contig32198|size148|read30|cov9.38_586593	armHet	3R	3R	non-TE non-Satellite	-0.160358	-0.420552	0.135346
nw>contig32694|size90|read20|cov9.66_76694	Novel	3Cen	3Cen	non-TE non-Satellite	0.0162139	-0.118642	0.0414476
nw>contig3273|size165|read98|cov28.61_106706	armHet	3R	3R	non-TE non-Satellite	-0.333984	-0.286904	-0.0168816
nw>contig3318|size135|read236|cov61.72_111014	armU/Uextra	2R	2Rn	TE	-0.057645	0.105976	0.0204917
nw>contig33267|size218|read38|cov8.50_16793	armHet	3Cen	3Cen	non-TE non-Satellite	0.0685324	-0.10191	-0.121241
nw>contig33280|size175|read38|cov10.73_436796	armHet	3Cen	3Cen	non-TE non-Satellite	-0.240359	-0.114782	-0.0360159
nw>contig33566|size134|read25|cov8.30_226851	armHet	3L	3L	non-TE non-Satellite	-0.127867	-0.499929	-0.157055
nw>contig33615|size200|read126|cov23.50_471023	armU/Uextra	2Cen	2R4	non-TE non-Satellite	0.0513336	-0.375775	-0.185577
nw>contig33961|size248|read56|cov10.65_96911	armHet	3Cen	3Cen	non-TE non-Satellite	-0.0139161	-0.59641	-0.180325
nw>contig34361|size365|read80|cov10.16_1586982	armHet	3Cen	3Cen	non-TE non-Satellite	-0.167689	-0.146031	-0.0141746
nw>contig34368|size395|read269|cov25.21_1761037	armHet	2R	2R5	non-TE non-Satellite	-0.0369809	-0.560603	-0.0058589
nw>contig34445|size88|read18|cov10.07_56996	armHet	3Cen	3Cen	non-TE non-Satellite	-0.095918	-0.469845	-0.229745
nw>contig34512|size245|read48|cov9.45_1207006	armHet	3R	3R	non-TE non-Satellite	-0.00557729	-0.0310989	0.0327613
nw>contig34715|size151|read27|cov8.11_167036	armHet	3R	3R	non-TE non-Satellite	-0.187248	0.0138638	0.066839
nw>contig35041|size96|read16|cov8.20_237091	armHet	3Cen	3Cen	non-TE non-Satellite	-0.174344	-0.180087	0.00783406
nw>contig35384|size202|read43|cov10.22_767139	armHet	3Cen	3Cen	non-TE non-Satellite	0.0101471	-0.211519	-0.138483
nw>contig35469|size148|read37|cov11.95_537157	armHet	3R	3R	non-TE non-Satellite	-0.160723	-0.164191	0.00411822
nw>contig35607|size101|read19|cov8.20_117184	armU/Uextra	3L	3L	non-TE non-Satellite	0.357281	-0.231019	-0.326941
nw>contig35886|size96|read17|cov8.40_127231	armHet	3L	3L	non-TE non-Satellite	-0.428297	-0.495544	-0.0211771
nw>contig35896|size270|read161|cov21.38_211057	armHet	2R	2R6	non-TE non-Satellite	-0.0175714	-0.0152018	-0.109834
nw>contig35905|size130|read28|cov9.98_207236	armHet	3R	3R	non-TE non-Satellite	-0.30891	-0.164732	-0.158149
nw>contig36141|size201|read131|cov23.82_211062	armHet	2Cen	2R2	non-TE non-Satellite	-0.239158	-0.154137	0.0934725
nw>contig36477|size579|read323|cov20.82_3701069	armHet	2Cen	2R2	non-TE non-Satellite	-0.0972531	-0.141006	-0.0776204
nw>contig36741|size135|read23|cov8.36_347360	armHet	X	Xn	TE	-0.0272386	-0.275021	-0.022171
nw>contig37221|size171|read29|cov8.28_997444	armHet	3R	3R	non-TE non-Satellite	0.0156803	-0.143322	-0.188985
nw>contig37594|size353|read83|cov11.18_2477500	armHet	3Cen	3Cen	non-TE non-Satellite	-0.186982	-0.259882	-0.0589197
nw>contig37719|size158|read29|cov9.05_247518	armHet	3Cen	3Cen	non-TE non-Satellite	-0.11422	0.0297454	0.0196524
nw>contig38529|size119|read63|cov20.55_151090	armHet	2R	2R2	non-TE non-Satellite	-0.197938	-0.276658	0.0461005
nw>contig38550|size133|read84|cov23.53_691091	armHet	2R	2Rn	non-TE non-Satellite	-0.257127	-0.541706	-0.213707
nw>contig39023|size104|read22|cov10.15_127729	armU/Uextra	Y	XY	TE	-0.372704	-0.564593	-0.437852
nw>contig39155|size195|read32|cov8.05_47751	armHet	3L	3L	non-TE non-Satellite	-0.281159	-0.21945	-0.0436454
nw>contig3934|size855|read531|cov22.66_921108	armHet	2R	2R5	non-TE non-Satellite	0.0100337	-0.575411	-0.102054
nw>contig39344|size162|read36|cov10.14_77784	armHet	3R	3R	non-TE non-Satellite	-0.162464	-0.525613	-0.179478
nw>contig3941|size275|read92|cov15.76_627796	armHet	3R	3R	non-TE non-Satellite	-0.261893	0.0733267	-0.101042
nw>contig39526|size150|read25|cov8.47_67808	armHet	3Cen	3Cen	TE	-0.0627509	-0.487257	0.0398117
nw>contig40106|size158|read89|cov20.80_291118	armHet	2Cen	2R2	non-TE non-Satellite	-0.43292	0.097211	0.131693
nw>contig4129|size107|read20|cov9.08_168017	Novel	3L	3L	Satellite	-1.32618	0.077818	0.780134
nw>contig41296|size110|read21|cov9.24_498016	armU/Uextra	3Cen	3Cen	non-TE non-Satellite	-0.0444001	-0.0975451	-0.162968
nw>contig4135|size390|read245|cov29.28_2828023	armU/Uextra	3R	3R	non-TE non-Satellite	-0.154033	-0.273736	-0.00941984
nw>contig41400|size181|read41|cov10.81_178025	armHet	3R	3R	non-TE non-Satellite	0.145164	-0.457118	-0.273505
nw>contig41558|size244|read51|cov9.88_968042	armHet	3Cen	3Cen	non-TE non-Satellite	-0.208349	-0.173583	-0.0191415
nw>contig41833|size554|read373|cov25.43_1391139	armHet	2R	2R5	non-TE non-Satellite	-0.0777619	-0.523821	-0.115155
nw>contig4189|size120|read21|cov8.05_168083	armHet	X	X4	non-TE non-Satellite	-0.273988	0.278622	0.535529
nw>contig4194|size109|read62|cov26.41_28091	armU/Uextra	X	Xn	non-TE non-Satellite	0.15276	-0.522371	0.1646
nw>contig42094|size112|read20|cov8.71_528105	armHet	3L	3L	non-TE non-Satellite	-0.248401	0.0625596	-0.021653
nw>contig4247|size381|read282|cov35.23_888141	armU/Uextra	X	Xn	non-TE non-Satellite	-0.272435	-0.285664	0.310515
nw>contig4270|size309|read104|cov16.12_858161	armHet	3L	3L	non-TE non-Satellite	-0.475802	-0.36961	0.0477752
nw>contig4289|size86|read24|cov14.15_228181	armU/Uextra	3R	3R	non-TE non-Satellite	-0.201667	-0.317722	0.218792
nw>contig42938|size155|read101|cov25.55_831155	armHet	2R	2R6	non-TE non-Satellite	0.00766156	-0.168469	-0.177895
nw>contig43528|size151|read29|cov8.76_28241	armHet	X	X4	TE	-0.1321	0.222672	0.554263
nw>contig44080|size173|read109|cov23.71_981175	armHet	2Cen	2R2	non-TE non-Satellite	0.0532655	-0.213105	-0.243202
nw>contig4621|size91|read105|cov41.36_71188	armHet	2Cen	2R2	non-TE non-Satellite	-0.195398	-0.220548	-0.052649
nw>contig4640|size179|read442|cov91.26_1081192	armU/Uextra	2R	2R6	non-TE non-Satellite	-0.210666	0.10498	-0.10469
nw>contig4662|size646|read304|cov22.15_1708492	armU/Uextra	3R	3R	non-TE non-Satellite	-0.156493	-0.168172	-0.0598813
nw>contig4667|size186|read70|cov18.46_228498	armU/Uextra	3Cen	3Cen	TE	-0.074947	-0.364373	-0.020854
nw>contig4719|size203|read172|cov31.74_441196	armHet	2Cen	2R2	non-TE non-Satellite	0.00316631	-0.56679	-0.267268
nw>contig47341|size211|read120|cov21.00_831200	armHet	2R	2R6	TE	-0.359081	0.079784	0.112067
nw>contig4771|size190|read238|cov46.80_41203	armU/Uextra	3R	3R	TE	-0.138089	0.00428015	-0.0690102
nw>contig4851|size569|read219|cov18.60_1428660	armHet	3Cen	3Cen	non-TE non-Satellite	-0.140857	-0.0764578	-0.127623
nw>contig4909|size789|read1350|cov64.22_4141215	armHet	2R	2R6	non-TE non-Satellite	-0.308589	0.0813501	0.154516
nw>contig49122|size96|read19|cov9.55_08713	armU/Uextra	X	Xn	TE	0.0191294	-0.494329	-0.201818
nw>contig5008|size568|read1288|cov83.59_191222	armU/Uextra	2Cen	2R4	non-TE non-Satellite	-0.0881975	-0.101713	-0.15261
nw>contig5009|size72|read13|cov9.21_128797	Novel	3Cen	3Cen	Satellite	-0.785482	0.157696	0.899212
nw>contig5024|size204|read275|cov50.76_21224	armHet	2Cen	2R2	non-TE non-Satellite	0.0071475	-0.36275	-0.237256
nw>contig5063|size159|read362|cov82.90_991229	armU/Uextra	2R	2R6	non-TE non-Satellite	-0.183496	0.086376	-0.141204
nw>contig5108|size267|read89|cov15.79_68881	armU/Uextra	Y	XY	TE	0.00606856	-0.583164	-0.520061
nw>contig51140|size83|read47|cov21.67_171239	armHet	2Cen	2CEN	TE	0.0914122	-0.419977	-0.200797
nw>contig5115|size366|read132|cov16.80_238887	armHet	3R	3R	non-TE non-Satellite	0.154709	-0.214859	-0.211731
nw>contig5130|size658|read195|cov14.01_5308900	armHet	X	X4	non-TE non-Satellite	0.0668496	-0.389002	0.2199
nw>contig51688|size214|read42|cov9.17_388937	armHet	3Cen	3Cen	non-TE non-Satellite	-0.0905896	-0.145747	0.0184342
nw>contig5218|size272|read67|cov11.93_958979	armU/Uextra	3R	3R	TE	-0.00725333	-0.495183	-0.187334
nw>contig52258|size214|read42|cov8.99_1408984	armHet	3L	3L	non-TE non-Satellite	-0.0992255	-0.242407	-0.152727
nw>contig5254|size309|read172|cov26.74_979006	armU/Uextra	3Cen	3Cen	non-TE non-Satellite	-0.0425551	0.0210051	-0.00459889
nw>contig52812|size105|read72|cov23.70_181255	armHet	2Cen	2R2	non-TE non-Satellite	-0.183861	-0.335695	-0.103063
nw>contig5288|size316|read196|cov23.45_891256	armHet	2R	2R5	non-TE non-Satellite	-0.188537	-0.470881	-0.112349
nw>contig53043|size201|read35|cov8.04_719052	armHet	3Cen	3Cen	non-TE non-Satellite	-0.0364302	-0.190676	-0.157896
nw>contig5362|size92|read16|cov8.47_149097	Novel	3L	3L	Satellite	-0.916261	-0.248631	0.923749
nw>contig5398|size317|read177|cov26.43_2259127	armU/Uextra	3Cen	3Cen	non-TE non-Satellite	-0.0437303	-0.0393724	-0.114991
nw>contig5429|size139|read58|cov18.35_209148	armU/Uextra	3Cen	3Cen	non-TE non-Satellite	-0.0253235	-0.0723795	-0.219444
nw>contig5442|size653|read265|cov19.18_2139161	armHet	3L	3L	non-TE non-Satellite	-0.237187	-0.471763	-0.0384767
nw>contig5451|size347|read388|cov41.03_111272	armHet	2Cen	2R2	non-TE non-Satellite	0.264226	-0.399694	-0.178842
nw>contig5555|size167|read48|cov12.22_29251	armHet	3L	3L	non-TE non-Satellite	-0.22213	0.106663	0.0243988
nw>contig5594|size178|read62|cov16.34_1079286	armU/Uextra	3Cen	3Cen	non-TE non-Satellite	-0.145988	-0.0385555	-0.0389333
nw>contig5652|size564|read215|cov18.15_5019332	armU/Uextra	X	X4	non-TE non-Satellite	-0.184376	-0.166353	0.032472
nw>contig5708|size1155|read1406|cov45.26_5761294	armU/Uextra	2Cen	2R4	non-TE non-Satellite	0.00562208	-0.380814	-0.18194
nw>contig57234|size97|read63|cov24.52_141297	armHet	2Cen	2Rn	non-TE non-Satellite	-0.157407	-0.385553	-0.0248359
nw>contig57341|size185|read35|cov8.24_239402	armHet	3Cen	3Cen	TE	-0.104889	-0.358518	-0.028252
nw>contig5756|size196|read286|cov54.36_1331301	armU/Uextra	2Cen	2R6	TE	-0.000792139	-0.0241319	-0.0992152
nw>contig5806|size587|read263|cov21.32_159443	armU/Uextra	X	Xn	non-TE non-Satellite	-0.183748	-0.244478	0.0716388
nw>contig58291|size297|read172|cov20.98_811307	armHet	2Cen	2R2	non-TE non-Satellite	-0.268026	-0.0754424	-0.0249908
nw>contig5847|size223|read424|cov69.73_1021310	armU/Uextra	2Cen	2R4	TE	-0.250178	-0.104119	-0.00119447
nw>contig59276|size92|read16|cov8.32_329529	armHet	3Cen	3Cen	non-TE non-Satellite	-0.0680151	-0.192739	-0.139727
nw>contig59651|size118|read24|cov8.74_359562	armHet	3Cen	3Cen	TE	0.0178202	-0.088496	-0.107177
nw>contig6127|size73|read73|cov35.97_21339	armU/Uextra	3Cen	3Cen	TE	-0.249374	-0.579612	-0.318611
nw>contig6147|size414|read115|cov13.72_439684	armHet	3R	3R	non-TE non-Satellite	-0.0433492	-0.297909	-0.189696
nw>contig6158|size95|read118|cov45.01_341342	Novel	2Cen	2CEN	TE	0.0275057	-0.512427	-0.211536
nw>contig6261|size956|read306|cov14.92_4469748	armHet	3R	3R	non-TE non-Satellite	-0.220116	-0.0192958	-0.0593348
nw>contig6346|size1346|read926|cov25.45_12031357	armU/Uextra	2Cen	2Rn	non-TE non-Satellite	-0.0942245	-0.192229	-0.297661
nw>contig6347|size643|read139|cov10.39_29813	armHet	3R	3R	non-TE non-Satellite	-0.310268	0.220533	0.0948696
nw>contig6486|size159|read113|cov27.35_421369	armU/Uextra	2R	2R6	TE	0.0283565	-0.0642229	-0.0647775
nw>contig65953|size150|read29|cov8.85_909976	armHet	3R	3R	non-TE non-Satellite	-0.0911918	-0.0971819	-0.0893796
nw>contig66194|size80|read14|cov8.18_209991	armHet	3Cen	3Cen	non-TE non-Satellite	0.0567843	-0.110021	-0.112125
nw>contig66589|size104|read20|cov9.14_010021	armU/Uextra	3R	3R	non-TE non-Satellite	0.0941535	-0.413675	-0.0755989
nw>contig66661|size85|read51|cov22.71_151382	armHet	2R	2R6	non-TE non-Satellite	0.0704891	-0.13314	-0.0108313
nw>contig6795|size198|read276|cov52.07_1291388	armHet	2R	2R6	non-TE non-Satellite	-0.128151	0.129318	-0.025993
nw>contig6869|size266|read54|cov9.90_610171	armHet	3Cen	3Cen	non-TE non-Satellite	0.0776362	-0.250313	-0.169841
nw>contig6957|size1095|read596|cov20.52_1981412	armHet	2R	2R5	non-TE non-Satellite	-0.185802	-0.59613	-0.0634866
nw>contig6958|size102|read31|cov14.11_210229	armHet	3R	3R	non-TE non-Satellite	-0.175905	-0.358285	-0.128127
nw>contig7006|size246|read149|cov21.63_251419	armHet	2Cen	2R2	non-TE non-Satellite	-0.240405	0.0412774	-0.0441448
nw>contig7121|size251|read289|cov43.82_161426	armHet	2R	2R6	non-TE non-Satellite	-0.190828	0.0898644	-0.0197677
nw>contig7124|size375|read516|cov52.19_2121427	armHet	2R	2R6	non-TE non-Satellite	-0.101421	0.00847672	0.0669235
nw>contig7175|size73|read14|cov9.74_1310367	Novel	3L	3L	Satellite	-1.72095	1.40495	2.34341
nw>contig7208|size159|read32|cov9.42_2910388	armU/Uextra	3R	3R	TE	-0.393163	-0.247154	-0.249535
nw>contig7233|size79|read58|cov27.37_11438	armU/Uextra	2Cen	2R2	non-TE non-Satellite	-0.055645	-0.190299	-0.103533
nw>contig7245|size233|read41|cov8.65_410413	armHet	3R	3R	non-TE non-Satellite	-0.0483357	0.0391725	0.0829034
nw>contig7294|size89|read50|cov22.37_2710449	armU/Uextra	3Cen	3Cen	TE	-0.200842	-0.380177	-0.219245
nw>contig7374|size198|read176|cov40.46_9110499	armHet	3R	3R	non-TE non-Satellite	-0.309698	-0.534802	-0.137226
nw>contig7394|size132|read111|cov30.99_511452	armHet	2R	2R6	non-TE non-Satellite	-0.0667912	0.231302	0.0292794
nw>contig7429|size306|read79|cov12.63_24610533	armHet	3Cen	3Cen	non-TE non-Satellite	0.16442	-0.276135	-0.214385
nw>contig7505|size539|read106|cov9.39_29310578	armHet	3Cen	3Cen	non-TE non-Satellite	-0.275983	-0.0861021	0.0272625
nw>contig7674|size96|read104|cov40.36_261486	armHet	2Cen	2R2	non-TE non-Satellite	-0.145465	-0.0869479	-0.0591652
nw>contig7680|size324|read309|cov35.28_1301488	armHet	2R	2R6	TE	-0.2984	-0.0285253	-0.0559536
nw>contig7711|size97|read18|cov8.28_1710702	armU/Uextra	3Cen	3Cen	TE	-0.0244911	-0.201895	-0.275019
nw>contig7723|size98|read27|cov13.47_1010710	armU/Uextra	3Cen	3Cen	TE	0.159815	-0.318798	-0.254802
nw>contig7749|size93|read43|cov20.71_1110725	armU/Uextra	3Cen	3Cen	non-TE non-Satellite	0.268908	-0.376189	-0.340666
nw>contig7783|size654|read211|cov14.92_46010744	armU/Uextra	3Cen	3Cen	non-TE non-Satellite	-0.0545634	0.0150202	-0.118503
nw>contig7801|size459|read260|cov21.22_2661497	armHet	2R	2R6	non-TE non-Satellite	-0.141962	-0.0771722	0.0654672
nw>contig7813|size452|read125|cov13.11_15610761	armHet	3Cen	3Cen	non-TE non-Satellite	0.144412	-0.227275	-0.147415
nw>contig7872|size162|read177|cov42.09_761504	armU/Uextra	2Cen	2R2	non-TE non-Satellite	-0.114486	0.0615097	0.0251336
nw>contig7885|size87|read21|cov11.33_910803	Novel	Y	XY	non-TE non-Satellite	0.308789	-0.159483	0.278331
nw>contig7902|size199|read46|cov10.88_13410813	armHet	3Cen	3Cen	TE	0.289687	-0.547003	-0.515086
nw>contig7943|size418|read231|cov25.95_13710837	Novel	3Cen	3Cen	non-TE non-Satellite	0.183461	-0.446006	-0.286932
nw>contig7944|size546|read181|cov15.85_21710838	armHet	X	X4	non-TE non-Satellite	-0.249012	0.15033	0.477382
nw>contig8001|size126|read92|cov34.58_210871	armHet	3R	3R	non-TE non-Satellite	-0.179485	-0.150736	0.105037
nw>contig8023|size2212|read1301|cov22.10_11011520	armHet	2Cen	2R2	non-TE non-Satellite	-0.140598	-0.047509	-0.0962368
nw>contig8036|size615|read131|cov10.09_32010893	armHet	3Cen	3Cen	non-TE non-Satellite	-0.310903	0.0671077	0.194035
nw>contig8037|size238|read91|cov17.89_10610894	armU/Uextra	3Cen	3Cen	non-TE non-Satellite	-0.0418106	-0.0907388	-0.00505986
nw>contig8039|size273|read48|cov8.49_21210895	armHet	3R	3R	non-TE non-Satellite	-0.199372	0.0866601	0.0599826
nw>contig8049|size99|read82|cov30.16_121524	armHet	2Cen	2Rn	TE	0.0687918	-0.171301	-0.0692389
nw>contig8099|size328|read105|cov15.30_4510930	armU/Uextra	3Cen	3Cen	non-TE non-Satellite	0.0301139	-0.535675	-0.533865
nw>contig8166|size325|read111|cov15.05_12710963	armHet	3L	3L	non-TE non-Satellite	-0.322781	-0.362889	0.0477763
nw>contig8171|size313|read77|cov11.13_21010964	armHet	3L	3L	non-TE non-Satellite	-0.250868	-0.443698	-0.109209
nw>contig8177|size320|read112|cov16.34_18810967	armHet	3R	3R	non-TE non-Satellite	-0.144398	-0.4338	-0.120238
nw>contig8183|size496|read209|cov19.86_42810973	armHet	3Cen	3Cen	non-TE non-Satellite	-0.198014	-0.0327553	-0.116958
nw>contig8280|size172|read367|cov78.18_351549	armU/Uextra	2R	2R6	non-TE non-Satellite	-0.269661	0.041789	-0.141642
nw>contig8280|size249|read45|cov8.38_7211036	armHet	X	X4	non-TE non-Satellite	-0.0286536	-0.126691	0.232733
nw>contig8285|size959|read1089|cov42.54_2161550	armU/Uextra	2Cen	2R4	non-TE non-Satellite	-0.106153	-0.268045	-0.080092
nw>contig8291|size2052|read1269|cov23.35_4681551	armHet	2Cen	2R2	non-TE non-Satellite	-0.182789	-0.0604532	0.0213343
nw>contig8294|size73|read70|cov36.21_01552	armU/Uextra	2R	2R6	TE	0.000425381	0.0125768	-0.0289485
nw>contig8408|size197|read61|cov14.77_5511107	armU/Uextra	3Cen	3Cen	non-TE non-Satellite	-0.0375886	-0.108618	-0.077325
nw>contig8496|size576|read169|cov14.23_21311150	armHet	3R	3R	non-TE non-Satellite	-0.00274222	-0.0390815	-0.163057
nw>contig8512|size153|read270|cov66.40_91571	armHet	2Cen	2R2	TE	-0.181592	-0.121804	-0.0658798
nw>contig8517|size186|read157|cov32.34_1161572	armHet	2R	2R6	non-TE non-Satellite	0.0043887	-0.255139	-0.260764
nw>contig8556|size185|read133|cov32.82_6411189	armU/Uextra	3Cen	3Cen	TE	-0.335809	0.13909	0.0608666
nw>contig8570|size252|read43|cov8.50_1311201	armHet	3Cen	3Cen	non-TE non-Satellite	-0.00967967	-0.197266	-0.0714585
nw>contig8629|size144|read24|cov8.01_5811230	armHet	3R	3R	non-TE non-Satellite	-0.135266	-0.376613	-0.308474
nw>contig8736|size326|read163|cov21.69_12911283	armHet	3R	3R	non-TE non-Satellite	0.0841243	-0.3668	-0.158509
nw>contig8756|size159|read96|cov22.36_841589	armHet	2Cen	2R2	TE	-0.357804	-0.252886	0.0304361
nw>contig8770|size202|read59|cov12.19_8011306	armHet	3L	3L	TE	0.175123	-0.594771	-0.274558
nw>contig8864|size139|read24|cov8.39_3011344	armHet	3L	3L	TE	0.0608573	-0.178698	-0.269934
nw>contig8873|size142|read100|cov25.82_761596	armU/Uextra	2R	2Rn	TE	0.14867	-0.312873	-0.29714
nw>contig8949|size1084|read618|cov21.58_8551601	armU/Uextra	2Cen	2R4	non-TE non-Satellite	-0.150468	-0.238521	-0.180348
nw>contig9035|size538|read877|cov61.19_461614	armHet	2R	2R6	non-TE non-Satellite	-0.30418	0.158764	0.0812402
nw>contig9042|size323|read85|cov12.22_18511439	armHet	3L	3L	non-TE non-Satellite	-0.0172512	-0.55692	-0.221193
nw>contig9046|size113|read21|cov9.00_4411442	armHet	3Cen	3Cen	non-TE non-Satellite	-0.0964031	-0.0612739	-0.148012
nw>contig9054|size150|read29|cov9.40_6711446	armHet	3Cen	3Cen	TE	0.175783	-0.555603	-0.293063
nw>contig9073|size208|read38|cov8.93_14711455	armU/Uextra	3Cen	3Cen	TE	-0.137788	-0.150862	-0.0571593
nw>contig9116|size378|read221|cov21.88_1211619	armHet	2Cen	2R2	non-TE non-Satellite	0.139923	-0.506772	-0.520819
nw>contig9189|size303|read313|cov38.09_1071625	armU/Uextra	3R	3R	non-TE non-Satellite	-0.369822	0.0906892	0.0012142
nw>contig9199|size171|read161|cov34.08_651626	armHet	2Cen	2R2	non-TE non-Satellite	-0.183096	-0.231786	-0.0297612
nw>contig9237|size1060|read658|cov23.13_5731629	armHet	2R	2R6	non-TE non-Satellite	-0.341431	0.36916	0.116041
nw>contig9248|size368|read94|cov12.07_21111550	armHet	X	X4	non-TE non-Satellite	-0.392272	0.222354	0.562441
nw>contig9308|size221|read46|cov10.24_1011583	armHet	3L	3L	non-TE non-Satellite	-0.196494	-0.171065	-0.0294703
nw>contig9368|size577|read387|cov24.89_3161638	armHet	2R	2R6	non-TE non-Satellite	-0.233659	0.0563302	0.174532
nw>contig9376|size617|read760|cov46.31_301639	armU/Uextra	2Cen	2R4	non-TE non-Satellite	0.0642299	-0.379095	-0.147437
nw>contig9403|size270|read82|cov14.11_4111636	armHet	3L	3L	non-TE non-Satellite	-0.180013	-0.593823	-0.159506
nw>contig9443|size302|read69|cov11.00_23211657	armU/Uextra	3Cen	3Cen	non-TE non-Satellite	-0.12663	-0.169114	-0.243165
nw>contig949|size763|read758|cov46.71_9311683	armHet	3R	3R	non-TE non-Satellite	0.0657108	-0.512734	-0.187323
nw>contig950|size619|read795|cov60.38_53711690	armU/Uextra	3R	3R	TE	0.16998	-0.547869	-0.0793844
nw>contig9541|size97|read78|cov29.58_51652	armHet	2R	2R6	TE	-0.00155822	0.00803415	-0.144308
nw>contig9581|size116|read63|cov20.59_51655	armHet	2Cen	2CEN	TE	0.102663	-0.361039	-0.518143
nw>contig9583|size930|read634|cov24.46_4911656	armHet	2Cen	2Rn	non-TE non-Satellite	0.196816	-0.542768	-0.566051
nw>contig9689|size190|read180|cov35.34_251665	armU/Uextra	2Cen	2R2	non-TE non-Satellite	-0.0388836	-0.159898	-0.190663
nw>contig9718|size669|read410|cov22.43_1371668	armHet	2Cen	2R2	non-TE non-Satellite	0.143129	-0.246455	-0.228566
nw>contig9733|size102|read17|cov8.12_1511802	armHet	3L	3L	non-TE non-Satellite	0.000556164	-0.532397	-0.238578
nw>contig9775|size160|read132|cov30.85_981675	armHet	2Cen	2R2	TE	-0.262043	-0.214516	0.049159
nw>contig9783|size340|read447|cov48.25_2231677	armHet	2Cen	2R2	non-TE non-Satellite	-0.290477	-0.079882	-0.0386414
nw>contig9797|size234|read120|cov23.95_711832	armHet	3Cen	3Cen	non-TE non-Satellite	0.15844	-0.260572	-0.353449
nw>contig9805|size432|read74|cov8.22_3811836	armHet	3Cen	3Cen	non-TE non-Satellite	-0.18916	-0.364298	0.040257
nw>contig9812|size206|read195|cov35.31_181680	armHet	2R	2R6	non-TE non-Satellite	-0.172207	0.000771551	-0.0916471
nw>contig9824|size190|read191|cov38.56_1231682	armHet	2Cen	2R2	non-TE non-Satellite	-0.0904339	-0.28208	-0.186978
nw>contig9948|size89|read34|cov18.19_1011912	Novel	Y	XY	TE	0.200003	-0.529566	-0.619585
nw>contig9965|size77|read60|cov26.38_141689	armU/Uextra	3Cen	3Cen	TE	-0.0332716	-0.239624	-0.10483
nw>contig9972|size166|read145|cov31.66_21690	armHet	2R	2R5	non-TE non-Satellite	-0.377914	-0.58693	-0.0438145
nw>contig9976|size134|read193|cov54.31_01691	armU/Uextra	2Cen	2R4	non-TE non-Satellite	-0.104017	-0.437765	-0.251586
nw>contig9998|size105|read23|cov10.19_3811944	armHet	3R	3R	non-TE non-Satellite	-0.26722	-0.486096	-0.262753
R10163|siz1	armHet	3R	3R	non-TE non-Satellite	-0.294859	-0.234246	-0.137772
R11065|siz13	armU/Uextra	3R	3R	non-TE non-Satellite	0.0313923	-0.301806	-0.156277
R1110|size14	armU/Uextra	3Cen	3Cen	non-TE non-Satellite	-0.00272353	-0.426577	-0.164736
R2919|size59	armHet	2L	2L	non-TE non-Satellite	-0.272695	-0.245753	0.0958445
R2919|size60	armHet	2L	2L	non-TE non-Satellite	-0.223334	-0.199013	0.109871
R32709|siz108	Novel	3Cen	3Cen	non-TE non-Satellite	-1.25716	0.532498	0.203582
R3809|size70	armHet	2L	2L	non-TE non-Satellite	-0.0819912	-0.298812	-0.174585
R47730|siz11514	Novel	2Cen	2CEN	non-TE non-Satellite	0.40029	-0.396629	0.344074
R52601|siz12379	Novel	2Cen	2CEN	non-TE non-Satellite	0.289112	-0.344292	0.336421
R6020|size162	armHet	3Cen	3Cen	non-TE non-Satellite	0.269547	-0.202362	-0.349128
R6290|size94	armHet	2L	2L	non-TE non-Satellite	-0.150707	-0.3207	0.0364426
R6290|size95	armHet	2L	2L	non-TE non-Satellite	-0.1394	-0.296251	0.0261924
R7478|size179	armHet	X	X4	non-TE non-Satellite	-0.32494	0.117046	0.625268
R9994|size194	armU/Uextra	3R	3R	non-TE non-Satellite	-0.0446015	-0.196092	-0.349414
ru>contig10163|size473|read151|cov15.08_41	armHet	3R	3R	non-TE non-Satellite	-0.0938816	-0.409079	-0.204962
ru>contig11065|size127|read42|cov15.57_3113	armU/Uextra	3R	3R	non-TE non-Satellite	0.13567	-0.329601	-0.20273
ru>contig1110|size460|read654|cov67.32_5414	armU/Uextra	3Cen	3Cen	non-TE non-Satellite	0.0808679	-0.546277	-0.27621
ru>contig1622|size109|read89|cov38.98_4939	armU/Uextra	3Cen	3Cen	non-TE non-Satellite	-0.161982	-0.397293	-0.312652
ru>contig2919|size291|read283|cov35.65_7960	armHet	2L	2L	non-TE non-Satellite	0.156279	-0.403254	-0.137669
ru>contig2919|size291|read283|cov35.65_8859	armHet	2L	2L	non-TE non-Satellite	-0.0669762	-0.212754	0.0051805
ru>contig3809|size117|read68|cov21.05_5470	armHet	2L	2L	non-TE non-Satellite	-0.080007	-0.331963	-0.225247
ru>contig6020|size390|read254|cov30.58_298162	armHet	3Cen	3Cen	non-TE non-Satellite	0.242362	-0.259102	-0.279999
ru>contig6290|size322|read199|cov23.17_1094	armHet	2L	2L	non-TE non-Satellite	0.0422912	-0.464475	-0.109878
ru>contig6290|size322|read199|cov23.17_395	armHet	2L	2L	non-TE non-Satellite	-0.0896985	-0.309965	0.0991673
ru>contig7478|size834|read397|cov20.98_21179	armHet	X	X4	non-TE non-Satellite	-0.340678	0.110898	0.480945
ru>contig9994|size112|read40|cov12.79_11194	armU/Uextra	3R	3R	non-TE non-Satellite	-0.111357	-0.0416539	-0.24746
