# Supplementary material for: Mapping the pericentric heterochromatin by comparative genomic hybridization analysis and chromosome deletions in Drosophila melanogaster
Source: HighWire-hosted journal article supplement (doi:10.1101/gr.137406.112), 2012-06-28
Supplement: Supplemental_Table_8-CGH_normalized_red_intensity.xlsx [file Supplemental_Table_8-CGH_normalized_red_intensity.xlsx]

## Sheet: Sheet1
CLID	Category	Cycle 14 ORE R	Chr2L-	Chr2R-	Chr2entire-	Chr3L-	Chr3R-	Chr3entire-	Chr4-	ChrX-	ChrXd-	ChrXY-	T(2;3)ftz[Rpl]	T(Y;2)B[SV5]	T(Y;2)B63	T(Y;2)B238	T(2;3)bxd[68]	T(Y;2)G10	T(2;3)E(da)	T(1;Y)B91	T(Y;2)R146	T(2;3)H31
A_09_P000046	euchromatic gene	10.2671	8.75208	10.7111	9.67779	10.301	10.3461	10.3668	10.2837	10.343	10.3227	10.4273	10.081	10.1119	10.2133	10.28	10.2088	9.80329	10.0914	10.3423	8.75608	10.5781
A_09_P000051	euchromatic gene	9.4217	7.87079	9.51804	8.70684	9.10564	9.0441	9.69222	9.2521	9.19975	9.46562	9.29628	9.2249	9.32667	9.28382	9.36364	9.0359	9.21153	9.1022	9.57515	8.23146	9.53556
A_09_P000056	euchromatic gene	10.5466	8.96212	10.5817	9.57769	10.315	10.2367	10.6507	10.4395	10.4533	10.4455	10.5544	10.2585	10.2784	10.2288	10.261	9.93051	10.1713	10.0298	10.5956	9.42455	10.645
A_09_P000061	euchromatic gene	9.64472	8.35746	10.1831	9.17928	9.90381	9.98245	10.2167	9.86623	9.96718	9.58414	10.2205	9.78729	9.73951	9.6238	9.5	9.64497	9.73596	9.5302	10.0756	8.66832	10.1029
A_09_P000066	euchromatic gene	9.89754	7.96642	9.84293	8.64951	9.65979	9.64717	10.2033	9.996	9.77772	10.0229	9.82886	9.72037	9.632	9.60727	9.75807	9.74987	9.61318	9.72551	10.0035	8.42444	9.90631
A_09_P000086	euchromatic gene	9.65445	7.89683	9.30257	8.18885	9.69964	9.75778	9.06623	9.65912	9.66671	9.59992	9.72201	8.81737	8.86169	9.37345	9.15044	9.18125	8.80076	9.34243	9.09142	7.92861	9.14263
A_09_P000161	euchromatic gene	9.44469	8.19101	9.46813	9.0456	9.61384	9.51109	9.74758	9.56628	9.57513	9.61727	9.62943	9.18957	9.28812	9.46577	9.41606	9.50773	9.16432	9.47134	9.38844	8.59428	9.71372
A_09_P000166	euchromatic gene	9.68434	8.53686	10.3592	9.661	10.176	9.925	10.0407	10.0087	9.98738	9.87638	9.93292	9.51006	9.53458	9.67618	9.78567	9.68449	9.56441	9.68905	9.85599	8.98246	10.1931
A_09_P000196	euchromatic gene	9.04725	7.74934	9.42823	8.52027	8.96959	9.01559	9.40848	9.00011	9.01578	8.99342	9.01408	8.92415	8.89424	8.90775	8.81758	8.89766	8.77154	8.96391	9.36135	7.91066	9.35995
A_09_P000201	euchromatic gene	9.63517	8.15988	9.84425	8.84115	9.65809	9.4647	9.75357	9.56155	9.55908	9.45405	9.59096	9.2082	9.34627	9.44289	9.44765	9.334	9.24988	9.29579	9.62939	8.32123	9.69109
A_09_P000206	euchromatic gene	9.41164	7.84922	9.32552	8.28545	9.29792	9.20001	9.73162	9.35886	9.33942	9.50848	9.54727	9.21752	9.3395	9.45659	9.55697	9.27555	9.27682	9.33112	9.63081	8.15518	9.54239
A_09_P000261	euchromatic gene	10.0788	8.35176	9.99703	8.99131	9.66585	9.70954	10.0616	9.65935	9.92994	9.75963	9.97828	9.70455	9.74871	9.62462	9.52665	9.35377	9.60602	9.41931	10.0377	8.87407	9.94293
A_09_P000346	euchromatic gene	9.87744	8.48264	10.1523	9.1211	9.94228	10.0481	10.3529	9.95931	10.1005	9.83181	10.3049	9.88199	9.88507	9.82118	9.64576	9.54625	9.85704	9.67016	10.201	8.84894	10.4036
A_09_P000356	euchromatic gene	9.80085	8.18934	9.63643	9.44504	9.87386	10.0378	10.0319	9.73129	9.95334	9.72295	10.0486	9.71909	9.64765	9.67432	9.91389	9.40382	9.56594	9.54897	9.75233	8.98405	9.87018
A_09_P000361	euchromatic gene	9.61834	8.10472	10.2199	9.17094	9.56256	9.64479	9.81128	9.40993	9.77199	9.43554	9.56819	9.46336	9.47913	9.42724	10.5572	9.18187	9.38189	9.11446	9.82407	8.33717	9.63823
A_09_P000366	euchromatic gene	8.82258	7.5358	8.86788	8.40248	9.19036	8.54779	9.29935	8.83838	8.72632	8.85686	8.64604	8.73478	8.91463	8.80148	8.87333	8.57595	8.76734	8.68933	9.06309	8.01144	9.01224
A_09_P000371	euchromatic gene	8.39737	7.42814	8.5308	8.28114	8.10002	8.263	8.90261	8.36912	8.07727	8.36429	8.53697	8.453	8.47948	8.17826	8.2222	8.31573	8.49545	8.4088	8.72646	7.75528	8.77503
A_09_P000376	euchromatic gene	10.1387	8.31772	9.68385	8.77742	9.69426	9.55136	10.329	9.9905	9.76964	10.0128	9.76973	9.76179	10.0136	9.81308	9.82147	9.52078	9.85538	9.84557	10.2023	8.72466	10.3115
A_09_P000381	euchromatic gene	9.87977	8.16976	9.81503	9.05164	9.56893	9.56231	10.1169	9.73696	9.64684	9.90281	9.67147	9.66575	9.68439	9.7354	9.61147	9.55964	9.6126	9.64339	9.97493	8.56776	9.9075
A_09_P000391	euchromatic gene	9.08026	7.59238	9.21723	8.54688	8.96834	8.86502	9.50453	8.94904	8.92814	9.06422	8.90894	8.80019	8.95348	8.75698	8.67656	8.72523	8.88959	8.78323	9.20384	7.97007	9.09583
A_09_P000446	euchromatic gene	9.10858	8.12943	9.42767	8.94828	8.97204	9.00536	10.6579	9.79454	9.08752	9.15498	8.94748	9.51876	9.13504	9.3758	9.32622	8.76983	9.87999	9.17126	9.68417	9.39406	9.75588
A_09_P000451	euchromatic gene	8.74418	7.72025	8.75773	8.37921	8.36949	8.39095	8.85236	8.52528	8.48124	8.41581	8.43839	8.42982	8.57103	8.5421	8.73414	8.26847	8.5411	8.42625	8.73011	7.90404	8.65707
A_09_P000456	euchromatic gene	9.51351	8.329	9.67288	8.74942	9.50179	9.681	10.1755	9.65616	9.5417	9.54858	9.63079	9.46746	9.55443	9.48428	9.31556	9.42333	9.36556	9.33588	9.74125	8.7909	9.94976
A_09_P000466	euchromatic gene	9.99589	8.7165	10.3631	9.05316	9.95437	9.89877	10.0894	9.97284	10.0135	9.93193	10.2199	9.54199	9.53738	9.67791	9.80236	9.46554	9.43922	9.63647	9.82682	8.3983	9.9439
A_09_P000531	euchromatic gene	10.1816	9.01213	9.95413	9.10909	9.54551	9.46201	10.2218	9.83122	9.53321	9.86575	9.74226	9.43475	9.48122	9.73203	9.62016	9.41437	9.48891	9.53405	9.66975	9.0946	10.0798
A_09_P000546	euchromatic gene	9.73106	7.91218	9.61185	8.77151	9.28895	9.31684	9.81862	9.36417	9.49406	9.45792	9.52726	9.05546	9.3624	9.20042	9.02024	9.24226	9.325	9.40275	9.67014	8.20451	9.61311
A_09_P000771	euchromatic gene	5.62318	5.96515	6.85518	7.13444	6.46171	6.6936	6.4084	6.87682	6.45597	5.9938	6.77014	6.03029	6.2061	6.63699	6.34001	6.9745	6.40557	6.6547	5.74309	6.16858	6.04368
A_09_P000781	euchromatic gene	10.5119	10.0029	11.1356	11.0476	11.2034	11.129	10.6125	10.7857	10.9171	10.8804	10.9136	10.0104	10.2042	10.6952	10.9838	11.2731	10.0759	11.0738	10.1623	9.90091	10.5663
A_09_P000806	euchromatic gene	9.07997	7.70728	9.5123	8.57621	9.00844	9.0242	9.39185	9.0714	9.07764	8.9543	9.34262	9.05611	8.9618	8.88391	8.87451	8.73263	8.91092	9.06788	9.15862	8.04741	9.47998
A_09_P000811	euchromatic gene	9.82362	7.95838	9.81671	8.81813	9.44908	9.42684	10.0501	9.58227	9.53423	9.71573	9.49554	9.56271	9.64097	9.58422	9.28437	9.35642	9.5999	9.46825	9.94549	8.31037	10.1639
A_09_P000831	euchromatic gene	9.95274	9.38448	10.5095	10.2862	10.2122	10.2177	10.2318	10.0667	10.2624	10.2765	10.0966	9.84964	9.95908	9.81182	9.93682	10.1364	9.66019	10.0782	10.3093	9.64072	10.2865
A_09_P000951	euchromatic gene	9.7343	7.91648	9.62675	8.66199	9.54656	9.39138	10.1097	9.58233	9.49185	9.7061	9.61195	9.34024	9.41351	9.49517	9.30163	9.19871	9.43692	9.30917	9.62507	8.37035	10.1279
A_09_P000976	euchromatic gene	9.34259	8.2689	9.60584	9.14318	9.36074	9.35685	9.36391	9.31141	9.45543	9.0857	9.35978	8.9019	8.91069	9.14419	8.97842	9.20308	8.84292	8.99194	9.20709	8.39817	9.24694
A_09_P000991	euchromatic gene	10.1086	8.71884	10.2979	9.49089	10.1041	10.1144	10.3476	9.96743	10.2764	10.0555	10.1753	9.96182	10.0464	9.90352	9.75844	9.75062	9.91735	9.72719	10.2331	9.26652	10.3915
A_09_P001001	euchromatic gene	9.25741	8.0114	9.13679	8.50197	9.6363	9.31999	9.79484	9.07652	8.86611	9.23634	9.01458	8.65777	9.05794	8.86726	8.88737	8.83196	8.97158	8.91329	9.11793	8.14041	9.77978
A_09_P001006	euchromatic gene	9.51217	8.16785	10.0354	8.95298	9.60293	9.78165	9.86135	9.57011	9.74482	9.43862	9.94237	9.47555	9.5738	9.48096	9.21301	9.45061	9.4085	9.36221	9.8364	8.41165	9.88965
A_09_P001026	euchromatic gene	9.01617	7.82136	8.5276	7.96992	8.88487	8.90451	8.8027	8.77531	9.01062	8.91014	9.00354	8.3886	8.38742	9.04787	8.79488	8.54278	8.4129	8.80724	8.73789	7.3984	8.85932
A_09_P001176	euchromatic gene	9.69259	8.09562	10.1155	8.73399	9.51076	9.6325	9.7513	9.4041	9.66563	9.39999	9.76338	9.34896	9.48877	9.24721	9.29788	9.02421	9.54922	9.24861	9.96575	8.35215	9.98348
A_09_P001186	euchromatic gene	9.72493	8.48127	9.97716	9.12476	9.83622	9.98682	9.91856	9.6846	9.86776	9.50797	10.0816	9.59938	9.50864	9.59835	9.39968	9.519	9.59484	9.39353	9.94392	8.4693	9.97841
A_09_P001456	euchromatic gene	8.93344	7.91364	9.20968	8.55818	8.91663	8.91042	9.24527	8.95175	9.03567	8.91256	8.92922	8.75154	8.9812	8.67501	8.79509	8.7789	8.8435	8.81006	9.09607	8.06196	8.92591
A_09_P001461	euchromatic gene	10.1444	8.73582	10.5678	9.4213	10.1289	10.279	10.3517	10.1573	10.2042	9.7431	10.3421	9.95222	9.84801	9.85524	9.75828	9.84981	9.91639	9.69628	10.1777	8.68088	10.1032
A_09_P001471	euchromatic gene	10.5579	8.54335	10.7447	9.43659	10.5162	10.6759	10.9615	10.5816	10.7021	10.63	10.8358	10.2287	10.2711	10.3457	10.3424	10.3903	10.0376	10.3121	10.5592	8.8689	10.4717
A_09_P001811	euchromatic gene	9.89038	8.54592	10.489	9.2199	10.0128	10.1632	10.2299	9.84851	9.98953	9.91246	10.1415	9.72435	9.57875	9.6625	9.4575	9.74246	9.74896	9.57731	10.0348	8.74582	10.1494
A_09_P002076	euchromatic gene	9.61001	8.01389	9.8823	8.73311	9.60399	9.6986	10.3864	9.95864	9.79776	9.91716	9.8169	9.65025	9.71272	9.52566	9.64693	9.53631	9.64244	9.67318	10.0516	8.42696	10.299
A_09_P002081	euchromatic gene	10.9574	10.0966	11.1055	11.1121	11.0662	11.088	11.4777	11.3445	10.8359	11.0491	10.8791	10.7854	10.9451	11.1756	11.5026	11.2394	10.8079	11.2424	10.5132	10.7514	11.2634
A_09_P002086	euchromatic gene	9.17625	7.81738	9.92067	8.78874	9.28484	9.22444	9.57461	9.18224	9.13272	8.98917	9.21007	9.11957	9.02134	8.88134	8.83328	8.71797	9.16865	8.93909	9.39305	8.19652	9.44822
A_09_P002136	euchromatic gene	10.2067	8.54241	10.7069	9.39307	10.2617	10.2251	10.4628	9.71436	10.4953	10.1972	10.5145	10.0905	10.2991	9.90807	10.055	9.69929	10.0637	9.96447	10.5475	8.67388	10.3392
A_09_P002141	euchromatic gene	10.1821	9.32893	10.2179	9.90971	10.0906	10.215	10.2539	9.87229	9.83207	9.86867	9.86876	9.70102	9.92312	9.89809	9.7476	9.94907	9.80082	9.81496	9.83608	9.60219	10.1059
A_09_P002166	euchromatic gene	9.02261	7.49748	9.35915	8.57285	8.78404	8.71006	9.37813	9.01374	8.82692	9.06887	8.89871	8.7821	8.97554	8.92676	8.77237	8.72267	9.01239	8.84709	9.16528	7.9224	9.34617
A_09_P002206	euchromatic gene	10.6625	9.00901	10.5181	9.58517	10.5064	10.4691	10.4681	10.3775	10.561	10.5159	10.6569	9.95851	9.94823	10.4319	10.2925	10.155	9.83536	10.1687	10.0983	8.84811	10.5285
A_09_P002346	euchromatic gene	9.40199	8.20861	10.0908	9.08977	9.57871	9.73241	9.85844	9.65761	9.67901	9.39852	9.82092	9.42672	9.33427	9.45982	9.3727	9.30868	9.31065	9.32725	9.63704	8.4765	9.73011
A_09_P002351	euchromatic gene	9.63354	8.23969	9.69777	8.92805	9.53925	9.64916	10.1755	9.69792	9.66592	9.80158	9.82258	9.49719	9.59186	9.60504	9.57466	9.56658	9.53612	9.6597	9.81107	8.59748	10.1233
A_09_P002466	euchromatic gene	8.89551	7.54331	9.35443	8.4124	8.88808	8.83971	9.25241	8.8692	8.88249	8.68619	8.89769	8.8247	8.94853	8.82496	8.68669	8.56277	8.8441	8.6382	9.19839	7.86109	9.2359
A_09_P002486	euchromatic gene	10.7017	9.58793	11.2364	10.8417	11.1662	11.0128	10.8359	10.9239	11.0819	10.9643	11.1096	10.4036	10.4628	10.4722	10.6054	10.7259	10.3666	10.7765	10.5468	10.0134	10.9484
A_09_P002506	euchromatic gene	9.43899	7.85214	9.73073	8.94367	9.36801	9.45896	9.63088	9.30477	9.48547	9.14073	9.54623	9.28672	9.18397	9.14976	8.9924	8.82194	9.19231	8.96997	9.56678	8.16793	9.41281
A_09_P002521	euchromatic gene	9.53907	7.97422	9.74701	8.74127	9.43057	9.53127	9.50985	9.48566	9.73206	9.43623	9.96168	9.17258	8.89135	9.22667	9.07608	9.26151	9.03393	9.17746	9.45476	7.8352	9.51318
A_09_P002601	euchromatic gene	9.63385	8.1612	9.86052	8.99436	9.78587	9.67593	9.99179	9.97479	9.90607	9.81319	10.0257	9.44915	9.5316	9.71957	9.62293	9.78506	9.3511	9.64753	9.63905	8.55569	9.92251
A_09_P002606	euchromatic gene	9.56645	9.0444	9.36837	9.33489	9.47229	9.37047	9.99346	9.72849	9.26258	9.59116	9.30262	9.70502	9.82599	9.81686	9.83709	9.60073	9.69036	9.80106	9.6018	9.64139	10.1462
A_09_P002611	euchromatic gene	9.40751	8.09502	10.3128	9.30408	9.50773	9.36824	9.85567	9.51444	9.51934	9.65006	9.58386	9.33571	9.46529	9.35323	9.49087	9.32928	9.38468	9.37526	9.73732	8.44708	9.96413
A_09_P002636	euchromatic gene	10.6438	8.61187	10.4382	9.19419	10.4886	10.5503	10.8454	10.5805	10.633	10.4277	10.7046	10.2446	10.2552	10.3619	10.3356	10.1093	10.1705	10.3061	10.5601	9.07152	10.7596
A_09_P002646	euchromatic gene	9.19968	7.91232	10.3105	8.88625	9.30537	9.49915	9.42568	9.23919	9.33283	9.00371	9.54499	9.05229	9.16837	9.12208	9.03335	9.01998	9.00917	8.89269	9.33499	7.92504	9.4178
A_09_P002661	euchromatic gene	9.88845	8.13638	10.2544	9.08465	9.90258	9.97773	9.88218	9.95095	10.0333	9.75088	10.2465	9.45015	9.46196	9.71573	9.64365	9.71476	9.36065	9.61376	9.76688	8.22514	9.63269
A_09_P002981	euchromatic gene	9.32104	8.16561	9.51339	8.66481	9.32653	9.50635	9.65748	9.28798	9.57225	9.33042	9.55405	9.33761	9.4258	9.22293	9.20217	9.1697	9.33164	9.13807	9.60936	8.5498	9.91021
A_09_P002986	euchromatic gene	8.74611	8.10499	8.9605	8.64438	8.74957	8.78733	9.40715	8.89718	8.70032	8.67317	8.70832	8.88927	9.11292	8.95656	8.77115	8.78308	8.89518	8.82127	8.72862	8.64996	9.01241
A_09_P002991	euchromatic gene	8.82727	7.61859	9.02989	8.15365	8.77193	8.84653	9.05252	8.69073	8.74913	8.50501	8.88722	8.7094	8.78267	8.66209	8.51475	8.63916	8.72257	8.42234	8.90106	7.79661	9.10638
A_09_P002996	euchromatic gene	8.8628	7.67764	9.42071	8.69229	8.87975	8.8592	9.16234	9.40253	8.65404	8.61037	8.75462	8.81884	8.95919	8.64449	8.65751	8.58029	8.8877	8.75197	9.03337	8.37231	8.97064
A_09_P003001	euchromatic gene	8.74406	7.43696	9.02319	8.2818	8.92504	8.82448	9.01622	8.78386	8.73727	8.84056	8.95299	8.28736	8.43154	8.59902	8.6141	8.49887	8.40137	8.61075	8.6608	7.7737	8.72903
A_09_P003006	euchromatic gene	16.3583	16.0774	15.622	15.6091	16.4489	16.1968	16.1165	15.8013	16.5672	16.2115	16.4732	15.8998	15.7698	16.1369	16.3866	16.2182	15.6484	16.1368	15.7271	15.7186	16.0284
A_09_P003011	euchromatic gene	8.32993	7.50141	8.91737	8.3505	8.49017	8.46819	8.69194	8.69773	8.32477	8.61663	8.56344	8.26699	8.55704	8.23522	8.23831	8.39311	8.37266	8.38232	9.02575	7.49151	8.49602
A_09_P003016	euchromatic gene	8.92259	7.679	9.0621	8.1599	8.99778	9.08139	9.12057	8.97263	9.09364	8.92408	9.21235	8.83729	8.71305	8.8007	8.6732	8.79132	8.71571	8.88552	9.24098	7.72412	8.91789
A_09_P003021	euchromatic gene	9.48932	7.84797	9.495	8.28275	9.59885	9.31898	9.52083	9.33572	9.47545	9.30815	9.53838	8.98458	9.22339	9.12415	9.20508	8.83417	9.04074	9.02861	9.41635	7.91826	9.21461
A_09_P003026	euchromatic gene	10.5329	8.65095	10.8473	9.3865	10.3844	10.4001	10.579	10.2825	10.5384	10.2964	10.7876	10.2397	10.2057	10.1657	10.2802	9.86149	10.0937	10.1313	10.3527	8.92642	10.4105
A_09_P003031	euchromatic gene	9.49376	7.91671	9.97467	8.84197	9.66146	9.42599	9.73949	9.46769	9.43516	9.38357	9.37344	9.06796	9.11056	9.25191	9.10368	8.82232	9.12801	9.14256	9.468	8.19891	9.41473
A_09_P003036	euchromatic gene	9.33595	8.02724	9.01579	8.43974	8.99458	9.12409	9.81213	9.43252	9.11756	9.21736	9.40598	9.19257	9.23308	8.98463	9.03622	9.21623	9.21161	9.20144	9.27807	8.12423	9.33788
A_09_P003041	euchromatic gene	8.90933	7.5467	9.03543	8.22481	8.99299	8.74115	8.99307	8.76973	8.93564	8.7726	8.98945	8.86957	8.86173	8.63663	8.76687	8.44254	8.74476	8.62734	8.95442	7.96866	9.30102
A_09_P003051	euchromatic gene	8.88366	7.75341	9.29833	8.53741	9.18505	9.13208	9.18149	8.97138	9.07764	8.87036	9.20066	8.84332	9.02922	8.70892	8.76315	8.54513	8.99463	8.68467	9.25885	8.44066	9.33834
A_09_P003056	euchromatic gene	9.46069	7.89074	9.786	8.74002	9.27644	9.41167	9.5814	9.25366	9.41583	9.42577	9.64174	9.03233	9.26577	9.09131	9.17214	9.36116	9.20518	9.2959	9.76804	8.12847	9.59275
A_09_P003061	euchromatic gene	9.24337	7.95838	9.55932	8.78318	9.29449	9.30846	9.02303	9.23069	9.47839	9.3982	9.36509	8.59508	8.75808	8.91287	8.87401	9.08237	8.58448	9.22685	8.90235	7.64353	9.05208
A_09_P003066	euchromatic gene	8.56138	7.48034	8.48001	8.02683	8.42454	8.43513	8.86573	8.45754	8.44399	8.33882	8.59311	9.04277	8.4665	8.46442	8.26727	8.33776	8.62604	8.32075	8.82268	7.60302	8.89855
A_09_P003071	euchromatic gene	11.138	8.94584	10.8992	9.54465	11.002	11.0479	11.2691	11.0123	11.3143	11.0909	11.3035	10.7061	10.7064	10.7846	10.841	10.6871	10.5715	10.7772	10.9312	9.35821	11.334
A_09_P003076	euchromatic gene	10.2565	8.34328	9.94678	8.80018	10.1189	9.81885	10.1896	10.0449	9.97366	10.0041	10.4902	9.67948	9.82327	9.838	10.0501	9.46324	9.62363	9.68138	9.85891	8.55748	10.4968
A_09_P003081	euchromatic gene	10.1717	8.15852	9.96393	8.97486	9.91985	10.1014	10.3103	9.65083	10.155	9.77681	10.1695	9.79564	9.77277	9.88292	9.59875	9.34019	9.76816	9.56749	10.0677	8.39882	10.3079
A_09_P003086	euchromatic gene	9.42053	8.18589	9.86237	8.99129	9.4949	9.73633	9.53067	9.36666	9.683	9.44197	9.68422	9.23076	9.31674	9.33948	9.30132	9.39121	9.3762	9.44953	9.53922	8.56391	9.83783
A_09_P003091	euchromatic gene	10.0056	8.23479	9.90285	8.82266	9.80873	9.82287	10.5109	9.94147	9.99043	10.1313	10.025	9.85376	9.9123	9.96435	9.91466	9.74592	9.84945	9.96649	10.2018	8.69922	10.5306
A_09_P003721	euchromatic gene	9.9944	8.75896	10.0691	9.23353	9.89016	9.893	9.966	9.72892	10.0009	9.96856	10.196	9.51471	9.63042	9.77896	9.90348	9.64068	9.43426	9.70728	9.82788	8.83534	10.1167
A_09_P003831	euchromatic gene	10.6075	9.1397	10.1992	9.20463	10.7016	10.9316	10.1324	10.6484	10.8182	10.6271	11.2083	9.57464	9.40971	10.5328	10.1829	10.4532	9.66748	10.349	9.86215	8.93167	10.3353
A_09_P003836	euchromatic gene	8.58104	7.41664	9.27414	8.48505	8.80702	8.76203	9.02873	8.83166	8.90256	8.579	8.94589	8.66472	8.74662	8.77801	8.66349	8.52267	8.61279	8.58436	8.89285	7.67427	8.87886
A_09_P003846	euchromatic gene	11.1609	10.6812	11.6483	11.3233	11.4667	11.4732	11.2599	11.482	11.5036	11.2433	11.6088	10.9735	10.9415	11.2344	11.3768	11.4355	10.8916	11.2271	10.9254	10.777	11.3211
A_09_P003851	euchromatic gene	10.1133	8.33506	10.1693	9.44377	10.0563	10.1578	10.4718	10.1991	10.0831	10.2461	10.1068	9.93637	10.0417	9.92316	10.1241	10.0752	9.87502	10.0462	10.2165	9.12871	10.3263
A_09_P003861	euchromatic gene	10.1132	9.66162	9.78866	9.03118	9.5806	9.46147	9.90874	9.51524	9.75538	9.42272	9.67629	9.46675	9.71348	9.37178	9.41781	9.2239	9.51379	9.29535	9.49533	9.47121	9.83203
A_09_P003896	euchromatic gene	10.3577	8.72427	10.5889	9.39803	10.2704	10.3576	10.2526	10.2049	10.6182	10.3265	10.7156	9.74404	9.85245	10.1363	10.3677	10.157	9.63895	10.1806	10.1898	8.61131	10.3779
A_09_P003991	euchromatic gene	10.953	9.28229	11.3959	9.89122	11.0558	11.331	10.2643	10.7732	11.3318	10.7527	11.6954	9.96329	10.0215	10.5956	10.9093	10.4829	9.9379	10.5929	9.99136	8.51983	10.554
A_09_P003996	euchromatic gene	9.924	8.81538	10.1717	9.24606	9.7631	9.70665	9.73902	9.91989	9.81583	9.88325	9.84661	9.22077	9.23183	9.61867	9.64262	9.53529	9.17859	9.62125	9.58424	8.28656	9.78821
A_09_P004031	euchromatic gene	9.46183	7.89285	9.71186	8.87827	9.2084	9.18421	9.7473	9.57545	9.32227	9.43153	9.38654	9.00262	9.38579	9.32037	9.48849	9.09016	9.23562	9.18141	9.57254	8.273	9.86766
A_09_P004056	euchromatic gene	10.732	9.45578	11.2826	10.4649	10.8503	10.866	10.8913	10.8019	11.0828	10.7966	11.1163	10.6972	10.6621	10.4955	10.3902	10.6421	10.3835	10.5966	10.898	9.80979	11.4588
A_09_P004061	euchromatic gene	8.91179	7.63767	9.08964	8.57258	8.89811	8.55199	9.33927	8.97977	8.62424	8.69631	8.62306	8.73117	8.76594	8.665	8.68607	8.53732	8.89819	8.78228	9.11031	8.1848	9.27789
A_09_P004071	euchromatic gene	9.74493	8.20414	10.22	9.50201	9.78358	9.9417	10.1212	9.82385	10.0233	9.83847	10.0741	9.50821	9.68928	9.84725	9.72321	9.78695	9.6272	9.78164	9.83228	8.69457	10.1164
A_09_P004076	euchromatic gene	9.41035	8.00959	9.4734	8.48903	9.41495	9.46133	9.61484	9.28678	9.52036	9.14405	9.58898	9.20712	9.28429	9.20641	9.39857	9.19288	9.13506	9.03056	9.53461	8.16031	9.72424
A_09_P004136	euchromatic gene	8.87144	7.42799	9.11979	8.45972	8.86	8.66638	9.21944	8.75061	8.79964	8.79182	8.83542	8.42679	8.70397	8.68602	8.56284	8.60455	8.53647	8.60923	8.69936	7.65171	8.85816
A_09_P004141	euchromatic gene	9.60883	7.91882	9.44644	8.43231	9.57924	9.55179	9.66423	9.51524	9.48517	9.51378	9.6162	9.2379	9.31878	9.39094	9.34143	9.23153	9.15693	9.38637	9.36832	8.09317	9.66162
A_09_P004146	euchromatic gene	9.27572	7.79804	9.74855	8.88185	9.17308	9.24994	9.67542	9.36139	9.35749	9.36786	9.48901	9.02655	9.20605	9.17771	9.00364	9.05076	9.16764	9.17004	9.45862	8.16778	9.59977
A_09_P004151	euchromatic gene	8.85977	7.49992	9.0342	8.42994	8.74298	8.76036	9.00119	8.53864	8.81212	8.6332	8.82211	8.67875	8.6343	8.64209	8.50254	8.50411	8.70444	8.60908	8.92561	7.72659	8.70178
A_09_P004171	euchromatic gene	11.5483	10.3432	11.6955	11.0237	11.3743	11.5546	11.0879	11.3551	11.5595	11.2117	11.7608	10.8146	10.7776	11.3594	11.2686	11.2355	10.8026	11.0551	11.0857	10.082	11.4431
A_09_P004221	euchromatic gene	9.55548	8.17046	9.97582	9.1092	9.55324	9.68855	9.61869	9.54342	9.70724	9.40676	9.75229	9.04177	9.143	9.37459	9.33404	9.36132	9.07478	9.1855	9.55672	7.89594	9.55741
A_09_P004356	euchromatic gene	8.89353	7.64924	9.55915	8.82731	8.79555	8.90846	9.50272	9.19583	8.96989	8.87886	9.07948	9.03615	9.0097	8.98386	8.97363	8.98291	9.03011	8.81076	9.27223	8.03126	9.44289
A_09_P004361	euchromatic gene	9.4448	8.12513	9.91728	9.01526	9.47486	9.43649	9.80582	9.45983	9.40947	9.4708	9.48537	9.41077	9.49465	9.22066	9.27828	9.2567	9.38007	9.32121	9.46637	8.5831	9.87766
A_09_P004466	euchromatic gene	8.95726	7.67305	9.3079	8.57991	8.83235	8.70999	8.94083	8.88304	8.94342	8.94022	8.85834	8.61891	8.87383	8.73566	8.6181	8.66713	8.65798	8.79967	9.10633	7.8234	9.2803
A_09_P004471	euchromatic gene	9.29169	7.8533	10.0626	8.86904	9.27337	9.4112	9.37591	9.33703	9.43136	9.2091	9.66134	9.26343	9.3135	9.09026	9.02047	9.10747	9.13743	8.98204	9.58431	8.17404	9.72547
A_09_P004501	euchromatic gene	9.8432	8.37555	10.4542	9.25714	9.9136	9.96825	10.0875	9.96567	9.93671	9.71891	10.2193	9.51777	9.54833	9.41021	9.36501	9.61805	9.4958	9.5151	9.9607	8.4922	10.0833
A_09_P004506	euchromatic gene	8.42383	7.21947	8.16143	7.76472	8.27523	8.05915	8.57345	8.23333	8.19779	8.1373	8.14377	8.22671	8.36586	8.22322	8.13716	7.94568	8.33026	8.09913	8.53346	7.35875	8.60804
A_09_P009516	euchromatic gene	9.78987	8.29945	9.75517	8.99303	9.7892	9.67632	10.0951	9.71339	9.79781	9.93188	9.93769	9.48088	9.63475	9.79636	9.85318	9.69733	9.52992	9.71531	9.7795	8.74517	10.1416
A_09_P009581	euchromatic gene	9.20666	7.81007	9.62811	8.64287	9.20466	9.25891	9.57245	9.3233	9.20933	9.26066	9.24896	9.02498	9.18065	9.05106	9.12223	9.18247	9.08579	9.20627	9.4356	8.17023	9.70425
A_09_P009621	euchromatic gene	8.76661	7.59821	9.06472	8.17656	8.76658	8.84482	8.98942	8.69277	9.10957	8.71596	9.1916	8.54627	8.84316	8.51676	8.5521	8.5601	8.55861	8.63254	8.9986	7.75182	8.99546
A_09_P009736	euchromatic gene	9.37544	7.94683	9.22402	8.54719	9.26463	9.19707	9.80843	9.23745	9.23928	9.34162	9.26441	9.15295	9.26286	9.17811	8.93974	8.95888	9.24585	9.08507	9.51336	8.21079	9.63442
A_09_P009786	euchromatic gene	9.22736	8.09137	9.434	8.66192	9.38342	9.54884	9.46197	9.24934	9.48947	9.07637	9.58128	9.03364	9.1716	9.03421	9.12762	9.22815	9.01269	8.99662	9.38016	8.42191	9.48066
A_09_P009826	euchromatic gene	9.78089	8.07727	10.1385	8.63201	9.70608	9.98949	10.1839	9.87277	9.93733	9.80037	10.1899	9.70112	9.61103	9.55619	9.57031	9.36886	9.50555	9.44428	9.94179	8.48471	10.0902
A_09_P009856	euchromatic gene	10.0031	8.55882	10.3351	9.33419	10.0653	10.06	10.431	10.0773	10.1809	10.0835	10.4573	9.68403	9.75074	9.72576	9.85412	9.83024	9.638	9.78718	9.86375	9.70333	10.0806
A_09_P009926	euchromatic gene	9.33985	7.84483	9.9593	8.76039	9.52283	9.32521	9.1678	9.11182	9.54745	9.09912	9.72417	8.96914	9.0698	8.94662	9.08237	8.86182	8.93165	9.0265	9.2074	8.05011	9.3658
A_09_P009936	euchromatic gene	9.38184	7.91761	9.5285	8.56791	9.95152	10.046	9.88014	9.41371	10.0843	9.58016	10.3199	9.10306	9.31121	9.5115	9.47317	9.29795	9.14433	9.355	9.29503	8.56761	9.82078
A_09_P009941	euchromatic gene	9.09595	8.03798	8.96935	8.1743	9.7	10.2329	9.02247	9.33915	10.175	9.1958	10.4805	8.63473	8.76345	9.36523	9.11018	9.28353	8.63237	9.26061	8.81883	8.04229	9.04029
A_09_P009961	euchromatic gene	9.84289	7.79477	9.59369	8.59621	9.3432	9.28847	9.25984	8.86686	9.28143	9.15604	9.58524	8.90671	9.06937	8.91679	8.93881	8.79291	8.9578	8.82667	9.5381	8.01687	9.51071
A_09_P009966	euchromatic gene	8.23146	7.05771	8.00509	7.59554	7.86455	7.88915	8.29865	8.02994	8.09826	7.93681	8.17825	8.06925	8.15633	8.13961	7.9938	7.9611	8.10511	7.94796	7.89075	7.30396	8.24507
A_09_P009986	euchromatic gene	8.96002	7.84998	9.09378	8.57567	9.23598	9.28129	9.17251	8.89506	9.15762	8.92707	9.18936	8.63279	8.77951	8.83041	8.77833	8.7909	8.62225	8.95239	9.21325	8.02634	9.08465
A_09_P010001	euchromatic gene	8.83167	7.40709	8.79271	8.08627	8.98228	8.99718	9.19159	8.97675	8.95718	8.84796	9.01109	8.53363	8.62161	8.6482	8.63539	8.53509	8.60024	8.79401	8.8448	7.86113	8.80762
A_09_P010006	euchromatic gene	10.2007	8.36987	10.1893	9.28769	10.0778	9.9194	9.63674	10.0141	10.0129	10.0724	10.1314	9.42215	9.58974	9.88724	10.0943	9.50257	9.50934	9.63357	9.8417	8.57448	10.1138
A_09_P010011	euchromatic gene	9.30329	7.97484	9.32412	8.51226	9.25432	9.25306	9.00465	9.28525	9.21177	9.20524	9.37833	8.72794	8.80374	9.16683	9.29438	9.03754	8.75134	9.02798	9.11475	7.69675	9.2528
A_09_P010016	euchromatic gene	11.0892	9.35765	10.4822	9.27638	10.8449	10.922	10.7097	11.0021	11.035	11.1066	11.1547	10.5753	10.6336	10.914	11.0934	10.7162	10.3424	10.8654	10.7586	9.33641	10.9207
A_09_P010041	euchromatic gene	9.0024	8.10961	9.86976	9.08683	9.01094	9.0302	9.44355	9.09855	9.1038	8.82434	9.21641	8.93996	9.0689	8.87669	8.66537	8.86534	8.90599	8.7252	9.19601	7.98481	9.15251
A_09_P010051	euchromatic gene	8.87289	7.53171	9.23031	8.47418	8.63858	9.00384	8.99961	9.02484	9.17436	8.52671	9.33797	8.74652	8.84489	8.88433	8.78448	8.56021	8.84879	8.63621	9.03658	7.90971	9.00742
A_09_P010146	euchromatic gene	9.04061	7.70966	9.36963	8.39651	9.13789	9.01029	9.34334	8.88534	9.05359	8.92658	9.13355	8.74885	8.98101	8.88196	8.86316	8.67628	8.82301	8.83922	9.25496	8.29354	9.27011
A_09_P010246	euchromatic gene	8.86898	7.44786	8.87185	8.29521	8.751	8.59098	9.10569	8.60618	8.74492	8.76152	8.80324	8.62341	8.9429	8.6757	8.59887	8.55872	8.83299	8.61781	9.04684	7.88452	9.31196
A_09_P010251	euchromatic gene	9.9003	8.70776	9.92993	9.03195	10.1946	10.2461	10.3337	10.0581	10.5904	10.1654	10.6654	9.76021	9.89352	10.1097	10.3785	9.94038	9.75197	9.96995	10.0196	9.01216	10.512
A_09_P010351	euchromatic gene	9.98835	8.44269	10.1409	9.31397	10.6583	10.7721	10.2376	10.2119	10.6914	10.2164	10.9294	9.68208	9.71002	9.86093	9.83376	9.88317	9.702	9.95765	10.0272	8.77429	10.2952
A_09_P010416	euchromatic gene	9.89449	9.01435	9.82608	8.68164	10.1241	9.96148	10.0698	9.90727	9.86206	9.83467	10.0871	9.54568	9.59488	9.73898	10.0392	9.71415	9.59068	9.6511	9.67304	8.71808	9.92558
A_09_P010466	euchromatic gene	9.69147	8.35516	9.90749	9.01624	9.47855	9.54344	9.86518	9.5534	9.70533	9.49959	9.63947	9.62326	9.59958	9.30314	9.21036	9.36222	9.77426	9.28864	9.85558	8.74347	9.81917
A_09_P010516	euchromatic gene	9.25204	7.71083	9.346	8.45164	9.32138	9.2536	9.75578	9.33269	9.32774	9.369	9.46047	8.99339	9.19762	9.20346	9.24799	9.12604	9.18264	9.18038	9.39714	8.1141	9.29786
A_09_P010521	euchromatic gene	10.6694	9.25681	10.5609	10.0951	10.5808	10.3875	10.7583	10.5884	10.4279	10.6318	10.6208	10.2308	10.3112	10.2915	10.3482	10.2634	10.1886	10.3151	10.394	9.465	10.5781
A_09_P010526	euchromatic gene	11.1093	9.89354	11.0628	10.4486	11.8361	12.1891	10.904	11.0561	12.072	11.3555	12.3242	10.7864	10.6675	11.2467	11.3867	11.2842	10.4033	11.2453	10.5519	10.0585	11.1476
A_09_P010536	euchromatic gene	8.92111	7.79546	9.52496	8.54357	9.40977	9.43568	9.25397	9.2262	9.70333	9.27756	9.8174	8.88009	9.02498	9.02992	9.08366	9.0691	8.95101	9.16634	9.15375	8.0783	9.439
A_09_P010636	euchromatic gene	10.0733	8.79955	10.4704	9.95143	10.1542	10.126	9.93037	10.1699	10.0543	9.98665	9.98728	9.72606	9.55323	9.76967	9.89337	9.87672	9.55459	9.83144	9.70783	9.01964	10.2447
A_09_P010706	euchromatic gene	9.35655	7.78488	9.86287	8.83509	9.31028	9.33603	9.61464	9.62779	9.46006	9.54652	9.51362	9.11111	9.27891	9.36429	9.2687	9.254	9.18051	9.30765	9.6213	8.09297	9.749
A_09_P010741	euchromatic gene	7.96301	7.07056	8.19691	7.96858	7.8961	7.88076	8.23562	7.78725	7.79567	7.87426	7.86362	7.81149	8.06182	7.9258	7.89168	7.84007	8.07118	7.9277	8.00562	7.23459	7.99351
A_09_P010756	euchromatic gene	10.1071	8.18864	10.5267	9.3018	10.0766	10.1385	10.2768	9.81788	10.351	10.0289	10.3595	9.82785	9.91848	9.80019	9.69977	9.72888	9.78145	9.66475	10.0763	8.50996	10.3098
A_09_P010761	euchromatic gene	9.28903	7.8742	9.48922	8.49935	8.95373	9.20086	9.63253	9.39074	9.14919	9.06981	9.39018	9.08039	9.23906	8.90033	8.91292	9.02236	9.12471	9.02289	9.59013	8.13366	9.61466
A_09_P010846	euchromatic gene	8.90816	7.76783	9.54874	8.61979	8.92763	8.99331	9.45884	9.19567	8.9776	9.04247	9.18126	8.96788	9.07425	8.99869	8.88416	9.01149	9.15563	8.94685	9.4835	7.9828	9.61106
A_09_P010861	euchromatic gene	9.1338	7.58943	9.64912	8.59603	9.00015	9.10134	9.39673	9.05963	9.20498	8.93181	9.23722	8.82593	8.9637	8.96291	8.96357	8.753	8.90442	8.84987	9.13816	7.94465	9.24119
A_09_P011056	euchromatic gene	10.2921	8.90585	10.3743	9.55971	10.062	9.99539	10.7478	10.6502	10.1171	10.6156	10.0838	9.99832	10.0329	10.1101	10.612	10.7146	9.98482	10.3852	10.3325	9.44979	10.5463
A_09_P011066	euchromatic gene	10.9209	10.3857	10.8187	10.8458	10.8245	10.7274	10.8477	11.0096	10.8812	11.1403	10.8306	10.4772	10.5184	10.6651	10.5578	10.7739	10.6901	10.7923	10.7321	10.58	10.8826
A_09_P011091	euchromatic gene	9.48393	7.79117	9.65876	8.76298	9.36776	9.15818	9.91316	9.35157	9.28421	9.38151	9.36622	9.30912	9.27911	9.43207	9.24807	9.17294	9.16919	9.25734	9.48898	8.10565	9.6327
A_09_P011096	euchromatic gene	10.9994	10.5211	9.84803	8.99079	11.7355	12.0715	10.8888	10.7818	12.1918	11.0508	12.2165	10.6242	10.7595	10.9828	11.2025	10.7931	10.5881	10.7839	10.6906	10.3916	11.7917
A_09_P011136	euchromatic gene	10.7398	10.1061	10.6847	10.1699	10.6365	10.6217	10.6195	10.7125	10.6939	10.6236	10.9184	10.4847	10.4026	10.4358	10.3236	10.3009	10.4034	10.6532	10.519	10.2838	10.7639
A_09_P011176	euchromatic gene	9.84851	8.57914	9.14297	8.42934	10.3842	10.6017	10.2327	9.81693	10.7467	9.95693	10.8001	9.61189	9.90242	9.98263	9.9188	9.71915	9.73656	9.84584	9.82984	9.56107	10.6666
A_09_P011181	euchromatic gene	10.5267	8.88577	11.1536	9.94625	10.9445	11.1772	11.0543	10.5516	11.0226	10.612	11.1707	10.3374	10.4217	10.4675	10.4191	10.5962	10.2808	10.3576	10.7709	9.11987	10.9995
A_09_P011196	euchromatic gene	8.55615	7.76767	8.52387	8.25107	8.51181	8.21597	8.60296	8.3986	8.38993	8.44988	8.47871	8.23593	8.31646	8.36584	8.43782	8.23367	8.35998	8.44469	8.46581	7.69446	8.52104
A_09_P011271	euchromatic gene	9.58407	7.79582	9.4301	8.62929	9.26657	9.08139	9.59498	9.10578	9.14233	9.25778	9.18794	8.88731	9.12843	9.042	8.93937	8.83788	9.09076	8.86628	9.31128	7.9826	9.40056
A_09_P011276	euchromatic gene	9.25965	7.84129	10.103	9.03971	9.30622	9.35449	9.6211	9.24236	9.32367	9.22438	9.3727	9.18443	9.26734	8.88583	8.97865	8.9045	9.07665	9.08746	9.45704	8.42676	9.76294
A_09_P011341	euchromatic gene	9.34969	8.19419	9.86378	9.20095	9.29376	9.30635	9.45341	9.12134	9.15253	8.94334	9.25363	8.94699	9.10178	9.07329	8.78266	8.98448	8.98558	8.83477	9.19323	8.25883	9.65376
A_09_P011346	euchromatic gene	9.07476	7.75977	9.73746	8.71729	9.39941	9.2892	9.2709	9.02488	9.27062	9.00203	9.5766	9.018	8.88338	8.89238	8.92847	8.82322	8.93298	9.00595	9.34095	8.03059	9.4701
A_09_P011416	euchromatic gene	9.30524	7.71575	9.98151	8.87255	9.34746	9.2877	9.63921	9.46129	9.41088	9.42528	9.58549	8.97578	9.25464	9.03045	8.96518	9.10564	9.13144	9.19729	9.40658	8.02323	9.63229
A_09_P011421	euchromatic gene	9.41599	7.84999	8.83138	8.10939	8.95067	8.96819	9.6862	9.14055	9.04505	9.35169	9.14035	9.13332	9.23176	9.17768	9.19079	9.03441	9.10115	9.20355	9.29228	8.11106	9.57789
A_09_P011471	euchromatic gene	9.70033	7.91533	10.3731	9.11481	9.56407	9.67575	8.87306	9.54957	9.69965	9.58009	9.81345	8.96576	9.08311	9.47868	9.52962	9.41697	8.95535	9.37864	9.25167	7.94151	9.51696
A_09_P011526	euchromatic gene	10.3929	8.48922	10.0058	9.46825	10.0416	10.0742	10.4999	10.4527	10.1744	10.3197	10.322	9.95337	9.97883	10.0201	9.95849	10.2146	9.8636	10.1552	10.0804	8.88347	10.3103
A_09_P011536	euchromatic gene	9.29327	8.42129	9.2472	8.58343	10.3848	10.8327	9.68297	9.56311	10.985	9.57409	11.2624	9.29941	9.39759	9.88	9.75575	9.78038	9.27364	9.6842	9.35666	9.04488	9.97815
A_09_P011561	euchromatic gene	9.12031	7.8692	9.48351	8.71205	9.26946	9.25198	9.54931	9.27422	9.12999	9.00094	9.50659	9.21147	9.13824	9.15769	9.03283	9.1379	9.16733	9.01457	9.37819	8.08385	9.74266
A_09_P011566	euchromatic gene	9.28015	7.91497	9.73272	8.6807	9.20488	9.16332	9.49772	9.12509	9.38671	9.15384	9.44497	8.94504	9.05688	9.00176	8.94009	8.86775	9.0006	8.94826	9.37903	8.10249	9.34919
A_09_P011741	euchromatic gene	10.7832	8.95131	10.0608	8.97226	10.5483	10.7001	9.68733	10.688	10.848	10.7047	11.0041	9.57953	9.57554	10.6309	10.4539	10.3651	9.48201	10.4114	9.81795	8.17923	10.1396
A_09_P011746	euchromatic gene	9.50637	7.82249	9.69907	8.66269	9.6679	9.56961	10.0305	9.56916	9.68262	9.59264	9.58547	9.29617	9.36386	9.38891	9.34419	9.33446	9.26591	9.31888	9.63433	8.16183	9.57299
A_09_P011771	euchromatic gene	9.20719	8.24693	10.0236	9.58575	9.5699	9.64997	9.58238	9.50914	9.78194	9.50148	9.87809	9.09242	9.23582	9.31451	9.44006	9.49097	9.02604	9.48912	9.25844	8.40342	9.39491
A_09_P011781	euchromatic gene	10.6564	10.1261	11.4821	11.6802	11.6535	11.7124	11.1245	11.3126	11.3976	11.5292	11.732	10.4601	10.5402	10.9432	11.1224	11.6847	10.791	11.3427	11.1955	10.2791	11.1603
A_09_P011786	euchromatic gene	9.55649	7.86111	9.92095	8.87713	9.70863	9.74116	9.6868	9.5697	9.79883	9.55296	9.8264	8.87073	9.00901	9.39211	9.20679	9.13016	8.98665	9.21719	9.4005	7.96722	9.53888
A_09_P011806	euchromatic gene	9.33332	7.97112	9.67616	8.88116	9.26547	9.59229	9.72214	9.29209	9.49577	9.44419	9.68468	9.19603	9.41846	9.32221	9.22173	9.16092	9.26574	9.23185	9.46931	8.36541	9.78838
A_09_P011816	euchromatic gene	10.0934	8.32274	10.4942	9.13177	10.0684	10.1286	10.4365	10.0864	10.2461	10.0587	10.4382	9.80274	9.92325	9.83703	9.92977	9.76452	9.83322	9.76436	10.1972	8.80351	10.4344
A_09_P011831	euchromatic gene	10.3745	10.0126	10.4321	10.1939	10.2649	10.4361	10.1839	10.1427	10.0072	9.93319	10.0815	9.7594	9.76472	9.91191	9.9515	10.1487	9.63376	10.047	10.0889	9.40331	10.2568
A_09_P011936	euchromatic gene	10.8151	10.3256	10.9842	10.7359	11.1975	11.0394	11.3694	11.3286	10.9573	11.4232	11.079	10.3105	10.3742	11.188	11.1623	11.5225	10.2806	11.42	10.3147	10.193	10.9114
A_09_P011941	euchromatic gene	8.28619	7.11796	7.92066	7.69877	7.91842	7.82723	8.27067	8.16514	7.96843	8.01804	7.94245	7.75837	8.03318	8.12399	8.13754	8.05245	8.02277	8.21057	8.2108	7.18115	8.12904
A_09_P011946	euchromatic gene	9.26006	8.07285	9.72023	8.84082	9.5604	9.51619	9.49824	9.28056	9.5274	9.12183	9.75584	9.13967	9.09578	9.1811	8.87809	9.03679	9.2361	9.04424	9.66703	8.11333	9.35012
A_09_P011986	euchromatic gene	9.71016	8.83644	10.0239	9.61805	10.0553	10.2756	9.94189	9.91794	10.1426	10.1646	10.2436	9.96176	9.89017	9.86335	10.0173	10.123	9.87731	10.0963	9.84667	9.28783	9.96042
A_09_P012051	euchromatic gene	9.33472	8.07912	9.79911	8.97446	9.24467	9.01231	9.53051	9.12817	9.14624	9.17415	9.15307	8.88258	9.00957	8.95757	8.91747	8.78785	9.00072	8.9449	9.16102	8.18065	9.24012
A_09_P012056	euchromatic gene	10.1047	8.77361	9.80998	8.94683	9.89831	9.81519	10.3545	9.98518	10.0658	10.1331	10.1648	9.84154	9.94686	9.91745	9.7662	9.73649	9.83118	9.81695	10.1592	8.97905	10.2557
A_09_P012116	euchromatic gene	9.42927	7.9497	10.2514	9.30639	9.69813	9.84202	9.79359	9.47735	9.68422	9.44063	9.74496	9.1197	9.28021	9.40577	9.21827	9.34429	9.23241	9.24214	9.53365	8.23783	9.67974
A_09_P012121	euchromatic gene	12.6285	12.2938	11.5666	11.5241	11.7923	11.9359	13.1102	12.3989	12.0442	12.9288	12.0746	12.9452	13.0801	12.6621	12.649	12.8478	13.1873	12.7208	13.2045	13.32	13.6036
A_09_P012126	euchromatic gene	9.60922	8.42045	9.49503	8.65767	10.1811	10.5827	9.95398	9.92056	10.719	10.2212	10.926	9.46246	9.48279	10.1762	10.3138	10.0376	9.37705	10.0935	9.67499	8.94315	10.1445
A_09_P012156	euchromatic gene	9.34877	7.80409	9.36701	8.62293	9.14894	9.0326	9.75373	9.36257	9.20851	9.40384	9.23806	9.13993	9.2112	9.08523	9.13397	9.09274	9.05721	9.29383	9.48272	8.10356	9.627
A_09_P012161	euchromatic gene	9.77752	8.10907	10.0736	8.66337	9.72545	9.77678	10.1899	9.91765	9.91323	9.89436	9.97162	9.74869	9.89664	9.51052	9.62859	9.67381	9.73205	9.64636	10.1208	8.49571	10.3631
A_09_P012201	euchromatic gene	9.40841	8.00725	9.90091	9.11507	9.2503	9.2075	9.78177	9.53052	9.23873	9.35633	9.16894	9.14587	9.23452	9.14229	9.12852	8.98166	9.19934	9.14195	9.54554	8.39949	9.58845
A_09_P012211	euchromatic gene	8.96117	7.50812	9.48424	8.52944	8.95668	8.97034	9.36947	9.09514	8.93829	9.02727	8.96219	8.82909	8.98266	8.82087	8.86579	8.68181	8.83989	8.78581	9.18439	7.92814	9.25981
A_09_P012231	euchromatic gene	9.99266	8.5657	10.3414	9.09696	10.3522	10.4339	9.56869	10.0798	10.5604	10.2307	10.726	9.0349	9.04678	10.1794	10.042	9.91416	9.06936	9.99509	9.48662	7.87454	9.59938
A_09_P012341	euchromatic gene	9.19267	7.77163	9.93479	9.13817	9.35036	10.21	9.47431	9.25407	9.64432	9.15343	9.93275	8.91585	9.08586	9.08952	9.07528	9.09922	9.09963	9.03449	9.26156	8.02826	9.34278
A_09_P012376	euchromatic gene	9.83879	8.06078	9.99709	9.11722	9.4937	9.40381	10.0038	9.79446	9.62054	9.80506	9.69363	9.41174	9.57258	9.57923	9.62857	9.30223	9.49778	9.48812	9.80938	8.40928	9.91873
A_09_P012386	euchromatic gene	8.77281	7.40295	8.64488	8.07779	8.72126	8.70825	9.10195	8.66419	8.77376	8.74656	8.8137	8.51798	8.61214	8.56969	8.54754	8.65849	8.60297	8.54665	8.69139	7.62664	8.85862
A_09_P012411	euchromatic gene	9.24401	7.76657	8.91888	8.25266	8.84053	8.69708	9.36591	8.96227	8.91107	8.94814	8.91839	8.92609	9.02822	9.13424	8.96509	8.58212	9.0622	8.77955	9.20596	8.51294	9.41854
A_09_P012436	euchromatic gene	11.4931	10.4623	11.5561	10.618	11.5139	11.8126	11.0147	11.3159	11.7191	11.2183	12.0029	10.6742	10.9111	11.2667	11.3143	11.0132	10.5204	11.1765	10.7913	10.3733	11.4744
A_09_P012471	euchromatic gene	9.43917	7.99864	10.0433	8.75789	9.74277	9.79128	9.85035	9.60656	9.81994	9.60623	10.1552	9.30947	9.37465	9.52274	9.5319	9.30433	9.27395	9.41651	9.43319	8.21252	9.77487
A_09_P012531	euchromatic gene	10.5425	8.88587	10.4867	9.61527	10.4099	10.2332	10.3272	10.3763	10.2801	10.3138	10.387	9.8934	9.954	10.1069	10.1547	9.87038	9.88127	9.92438	10.0904	9.02029	10.4938
A_09_P012561	euchromatic gene	10.4032	8.60559	10.2768	9.22969	10.1472	10.1933	10.705	10.2035	10.2884	10.3411	10.4504	10.1244	10.2087	10.2511	10.4484	9.93885	10.0235	9.95966	10.4049	8.98412	10.779
A_09_P012566	euchromatic gene	11.0834	10.9792	11.712	11.3687	11.6494	11.4583	11.1466	11.1407	11.2515	10.9416	11.1987	11.0887	11.0673	10.904	10.8555	10.8589	10.997	10.7861	11.0998	11.174	11.7813
A_09_P012571	euchromatic gene	12.0841	11.6308	12.0859	11.8212	11.95	11.9582	11.5266	11.8557	11.9167	11.845	11.8563	11.5419	11.4992	11.7629	11.7234	11.8681	11.5303	11.5843	11.5441	11.5698	12.1104
A_09_P012596	euchromatic gene	9.09154	7.76842	9.39627	8.63122	8.99182	8.85678	9.34163	9.09847	9.06501	8.80017	9.17178	8.90679	8.82115	8.75481	8.63204	8.80043	9.01825	8.69258	9.4313	7.92799	9.09867
A_09_P012616	euchromatic gene	9.08291	7.63495	9.1743	8.33319	9.40662	9.43878	8.98991	8.94161	9.3967	9.0071	9.05255	8.6622	8.83766	8.814	9.93561	8.96149	8.71759	8.90319	9.22603	7.76268	9.32305
A_09_P012651	euchromatic gene	9.20163	7.90863	9.84699	8.87792	9.19704	9.34823	9.62013	9.37676	9.37497	9.16114	9.49971	8.89769	9.04095	8.96811	8.91307	8.92194	8.87523	9.10803	9.20097	8.10972	9.46838
A_09_P012666	euchromatic gene	9.24159	7.8824	9.31088	8.34053	9.55766	9.67337	9.69546	9.48434	9.67988	9.36864	9.83194	9.18414	9.24741	9.30737	9.32548	9.28937	9.23378	9.24299	9.678	8.21556	9.62282
A_09_P012671	euchromatic gene	9.9334	8.06836	9.62976	8.45506	9.82134	9.66419	10.0376	9.65016	9.84822	9.70163	10.0624	9.47378	9.55904	9.51076	9.55483	9.24188	9.40743	9.4007	9.71785	8.34197	10.0606
A_09_P012686	euchromatic gene	9.65643	8.22628	9.83596	8.75826	9.76031	9.62805	9.81429	9.63681	9.62892	9.59242	9.75973	9.29763	9.40072	9.4088	9.42379	9.46903	9.3323	9.48108	9.91997	8.31972	9.96623
A_09_P012726	euchromatic gene	9.86579	8.56123	10.3475	9.66621	9.98622	10.0013	10.6213	10.0961	10.1238	10.0814	10.114	9.69111	9.84757	9.8135	9.78061	9.91739	9.73344	9.83738	10.1021	8.88018	10.2045
A_09_P012861	euchromatic gene	9.03564	7.83003	8.57141	9.01129	8.80202	8.64618	9.35368	8.85794	9.05502	9.00187	9.28177	8.40926	9.03559	8.80848	8.86851	8.31371	8.66704	8.84282	9.3564	8.14768	8.78475
A_09_P012886	euchromatic gene	8.99975	7.56732	9.51889	8.70199	9.02468	9.0056	9.23005	8.91022	8.93203	8.96977	9.10208	8.77615	8.90411	8.73087	8.72198	8.79091	8.97068	8.82407	9.32326	7.8516	9.36619
A_09_P012901	euchromatic gene	8.51542	7.77068	9.56767	8.6485	8.51684	8.60866	9.22506	8.97335	8.92129	8.76997	8.96787	8.70638	8.57823	8.71082	8.66052	8.74001	8.67887	8.68663	9.08257	7.92446	9.42059
A_09_P012906	euchromatic gene	9.50906	8.86373	9.21149	8.8415	9.32081	9.34382	9.87037	9.60856	9.58816	9.71975	9.7161	9.22198	9.24602	9.76168	9.51148	9.22541	9.18736	9.24668	9.56088	9.04683	9.91581
A_09_P012931	euchromatic gene	10.9419	10.1024	11.3315	10.9554	11.234	11.3162	11.3095	11.3587	11.1987	11.2774	11.2211	10.5672	10.6131	10.7538	10.9347	10.9275	10.5486	10.9768	10.9878	10.3212	11.367
A_09_P012936	euchromatic gene	9.20072	8.05103	9.70273	8.99734	9.36206	9.06059	9.56089	9.11166	9.16018	8.89829	9.28027	8.91553	8.98209	8.89463	8.8585	8.98195	9.04079	8.94088	9.41706	8.05336	9.47679
A_09_P012946	euchromatic gene	9.34233	8.08333	9.48667	8.71359	9.14731	9.25321	8.99418	9.26994	9.32606	8.98808	9.45701	8.50234	8.51104	9.21649	9.12557	8.84487	8.37522	8.96207	8.68654	7.59496	8.72716
A_09_P012956	euchromatic gene	9.13808	7.94193	9.7665	9.20574	9.4761	9.64197	9.72797	9.48176	9.41199	9.50307	9.39523	9.09126	9.08683	9.10816	9.22599	9.42457	9.17892	9.36421	9.40433	8.67489	9.42423
A_09_P012971	euchromatic gene	10.5305	8.77754	10.2957	9.48865	10.4264	10.6272	9.88099	10.3689	10.7574	10.2015	10.8689	9.7783	9.76765	10.2267	10.0639	10.1749	9.7699	10.0262	10.074	8.56705	10.2003
A_09_P012976	euchromatic gene	10.8838	10.1232	11.1259	10.969	11.2474	11.0442	11.2015	11.225	11.1046	11.4425	11.2361	10.8681	10.9274	11.0959	11.3545	11.6819	10.7915	11.4709	11.0024	10.6789	11.4309
A_09_P012991	euchromatic gene	9.69935	9.06594	9.70342	8.53386	10.6659	11.1946	9.69441	10.1233	11.1382	10.0963	11.5032	9.62472	9.38822	10.2164	9.94582	10.0324	9.47977	9.86355	9.65153	9.03949	10.0084
A_09_P013001	euchromatic gene	9.71175	8.91393	10.1464	9.75719	10.0599	10.0249	9.88216	10.1377	10.0151	9.98395	10.042	9.32873	9.38446	9.39313	9.68296	9.57327	9.40982	9.59369	9.63463	9.66515	10.0853
A_09_P013041	euchromatic gene	10.1766	8.66762	10.3543	9.62416	10.0522	10.1903	9.90113	10.1122	10.2849	9.84296	10.3723	9.45973	9.50023	9.86704	9.75713	9.90128	9.33101	9.68165	9.76738	8.37072	9.96247
A_09_P013076	euchromatic gene	8.90438	7.53928	9.05286	8.55972	9.04678	8.90459	8.88627	8.56567	8.95834	8.61081	8.89233	8.41937	8.55751	8.73562	8.63378	8.59181	8.62183	8.56193	8.83549	7.47318	8.89753
A_09_P013086	euchromatic gene	10.0245	8.14876	10.1642	8.81112	9.89977	10.0257	10.2887	9.73722	10.0992	9.925	10.1004	9.82573	9.87355	9.74126	9.71282	9.73223	9.73978	9.57072	10.0246	8.45765	10.2747
A_09_P013106	euchromatic gene	9.261	7.78704	9.24023	8.60582	9.06791	9.01354	9.31024	9.38316	9.05439	9.28598	9.2783	9.10362	9.23108	9.22202	9.47176	9.1007	9.13963	9.10578	9.4525	8.16686	9.71115
A_09_P013181	euchromatic gene	9.13834	7.74331	8.99858	8.88313	8.97275	8.93237	9.27438	9.02593	8.92961	9.18665	8.95194	8.73978	9.01626	9.174	9.38154	9.22702	8.82654	9.26463	8.99448	8.20586	9.00084
A_09_P013196	euchromatic gene	10.3532	9.72505	10.9862	10.7876	10.7982	10.9005	10.5063	10.8863	10.7925	10.465	10.9444	10.3758	10.2062	10.4473	10.3663	10.7907	10.2936	10.502	10.3713	10.0192	10.8268
A_09_P013231	euchromatic gene	9.36566	7.89185	10.0544	9.02281	9.43261	9.62329	9.65913	9.41319	9.52022	9.1387	9.66278	9.33111	9.18142	9.18429	9.01298	9.12359	9.18551	9.04426	9.43646	8.17978	9.85583
A_09_P013261	euchromatic gene	9.20211	8.01062	9.83132	8.97043	9.17432	9.32401	9.54439	9.15258	9.43131	9.20113	9.4811	9.30642	9.26231	9.0099	9.01992	9.0026	9.30846	9.04661	9.55274	8.29683	9.6037
A_09_P013266	euchromatic gene	8.81308	7.46357	8.96728	8.06611	9.01439	8.96926	9.01105	8.80081	9.12345	8.79659	9.33398	8.42001	8.5209	8.70135	8.58172	8.54247	8.50114	8.62189	8.63703	7.53075	8.92886
A_09_P013281	euchromatic gene	9.53519	7.82001	9.96405	9.00581	9.40654	9.37175	9.86635	9.60274	9.5754	9.57093	9.71024	9.17948	9.41206	9.4534	9.46747	9.39901	9.35621	9.52249	9.7167	8.34227	9.56395
A_09_P013301	euchromatic gene	9.31602	7.75439	9.94663	9.0278	9.18469	9.14399	9.60066	9.521	9.23002	9.56451	9.2792	9.02315	9.18085	9.04309	9.10231	9.20734	8.97919	9.23048	9.29197	8.01554	9.54619
A_09_P013381	euchromatic gene	10.152	8.10558	10.0578	8.97315	9.85943	9.73421	10.3737	10.1465	9.91443	10.1853	9.85511	9.79215	9.75561	9.74773	9.86068	9.91398	9.67468	9.996	10.07	8.55765	10.2163
A_09_P013411	euchromatic gene	9.95551	8.71381	10.2198	9.80175	10.1595	9.97298	10.4059	10.2347	10.2228	10.2782	10.2666	9.81051	9.93181	10.0174	10.0989	10.0697	9.79812	10.1639	10.0768	9.32163	10.4027
A_09_P013421	euchromatic gene	8.94419	8.00866	9.56931	9.22339	9.35269	9.45814	9.5056	9.41993	9.469	9.24651	9.40804	8.9999	9.04698	8.92741	9.05411	9.30669	8.8354	9.2871	9.40441	8.20516	9.53171
A_09_P013431	euchromatic gene	9.72972	8.22396	10.2119	9.18532	9.67887	9.72846	10.1463	9.79607	9.72237	9.61846	9.70743	9.44562	9.52949	9.42069	9.47096	9.34104	9.41593	9.47539	9.76507	8.57899	9.70755
A_09_P013461	euchromatic gene	9.15778	7.64655	9.62656	8.59474	9.24029	9.19142	9.7098	9.3286	9.38476	9.18958	9.41732	8.95547	8.89067	9.05172	9.0302	8.89566	8.76034	8.8266	9.22533	8.04329	9.46804
A_09_P013481	euchromatic gene	9.89583	8.03071	9.93608	8.97882	9.68163	9.52233	9.97915	9.46698	9.82087	9.8115	9.74822	9.60666	9.67213	9.42827	9.217	9.3605	9.53216	9.43329	10.0131	8.46234	10.1213
A_09_P013526	euchromatic gene	8.83047	7.58778	9.20646	8.14261	8.92825	9.01835	9.27195	8.68784	8.74901	8.91688	9.11088	8.95802	8.98014	8.57515	8.48611	8.56974	8.87513	8.58332	9.01433	7.75849	9.44094
A_09_P013531	euchromatic gene	8.72804	7.44857	9.22354	8.21514	8.73551	8.786	8.98138	8.66245	8.71736	8.65303	8.68658	8.52866	8.71911	8.56894	8.44363	8.43979	8.64594	8.39423	9.06059	7.6683	9.01997
A_09_P013536	euchromatic gene	9.93928	8.13923	10.1125	9.06397	9.59044	9.47928	9.93774	9.57313	9.67574	9.73099	9.65933	9.50152	9.5346	9.58109	9.37564	9.37311	9.35496	9.39518	9.68801	8.33586	9.90085
A_09_P013541	euchromatic gene	9.76651	8.95054	10.0741	9.32679	9.7365	9.81762	9.80178	9.63966	9.81141	9.47468	9.84933	9.69413	9.64443	9.4637	9.6713	9.39077	9.54426	9.38689	9.82543	9.19321	9.95191
A_09_P013546	euchromatic gene	10.3136	9.15873	10.5051	10.081	10.3602	10.4601	10.0839	10.2105	10.5156	10.2943	10.6462	9.65103	9.73938	10.2123	10.2957	10.0116	9.5428	10.1354	9.77007	9.07456	10.1061
A_09_P013551	euchromatic gene	9.86376	8.1074	10.1653	8.89986	9.68977	9.66111	10.0945	9.87031	9.80193	9.8042	9.85664	9.43697	9.63635	9.60237	9.4946	9.47713	9.56676	9.59191	9.8752	8.37747	9.92887
A_09_P013556	euchromatic gene	9.22325	7.8052	9.78627	8.86287	9.15181	9.17929	9.30691	9.08043	9.11077	9.10611	8.99876	8.97065	9.07925	8.99624	8.82345	8.84533	9.1129	8.94826	9.39298	8.28501	9.45872
A_09_P013561	euchromatic gene	9.69582	8.11832	9.96012	8.70202	9.74309	9.75189	9.7712	9.52976	9.51727	9.49418	9.91079	9.43036	9.39203	9.29676	9.23145	9.28324	9.41404	9.38123	9.85143	8.38741	9.72175
A_09_P013566	euchromatic gene	8.60292	7.53278	9.33317	8.40435	8.87496	8.99123	8.98832	8.54726	8.87796	8.57106	8.9863	8.28946	8.88368	8.4646	8.53726	8.28467	8.69659	8.84091	8.93457	8.03138	8.88945
A_09_P013571	euchromatic gene	8.35835	7.78138	9.19499	8.99495	8.77112	9.09267	8.59261	8.78949	8.98914	8.47723	9.11336	8.54446	8.58893	8.71973	8.63338	8.77604	8.71958	8.61418	8.69793	8.11273	8.31234
A_09_P013576	euchromatic gene	10.0972	8.7139	10.1054	9.73463	10.3062	10.2276	10.406	10.329	10.3229	10.2601	10.2799	9.73111	9.74899	10.0108	9.88803	10.2302	9.69112	10.0404	10.0234	9.06894	10.1693
A_09_P013581	euchromatic gene	9.20884	8.06827	9.44398	8.79144	9.09749	9.14101	9.51469	9.15235	9.5368	9.085	9.7366	9.26609	9.05884	9.41532	9.07828	8.96186	8.9636	8.94668	9.37392	8.03596	9.1952
A_09_P013586	euchromatic gene	9.52914	7.85752	10.0374	9.09475	9.60523	9.57858	9.98752	9.71998	9.80857	9.62749	9.82126	9.28628	9.30147	9.25865	9.40765	9.30257	9.25275	9.3878	9.64376	8.31865	9.64718
A_09_P013591	euchromatic gene	8.6349	7.47304	8.93748	8.1041	8.6723	8.72036	9.20351	8.8815	8.70993	8.62946	8.84145	8.64674	8.65795	8.78217	8.66373	8.6325	8.67971	8.66858	8.93392	7.63599	8.79693
A_09_P013596	euchromatic gene	10.5267	9.21836	11.0075	10.4103	10.6046	10.6262	10.6817	10.6598	10.6844	10.5558	10.784	10.3226	10.3717	10.2811	10.8652	10.6174	10.0995	10.4089	10.8027	9.50422	10.7781
A_09_P013601	euchromatic gene	10.8838	8.95914	11.3092	9.73135	11.0921	11.4352	10.8983	10.4559	11.3511	10.6913	10.8994	11.0777	10.8157	10.8374	10.7771	10.357	10.2983	10.7851	11.1906	10.3722	11.0463
A_09_P013606	euchromatic gene	10.208	9.35903	10.2086	9.73177	10.0292	9.92578	9.90171	10.1882	10.1672	10.0277	10.335	10.0424	9.92666	10.0047	10.0453	10.03	9.80799	10.1518	9.96446	9.63365	9.86718
A_09_P013611	euchromatic gene	9.4327	7.88996	9.53093	8.70609	9.1693	9.15562	9.84538	9.28196	9.16192	9.35758	9.35584	9.15345	9.17329	9.29676	9.15397	8.95485	9.13548	9.03226	9.38987	8.12913	9.4426
A_09_P013616	euchromatic gene	8.69614	7.6105	8.65384	8.23357	8.65551	8.65249	8.94635	8.52216	8.77399	8.55534	8.71788	8.59503	8.71959	8.52265	8.61942	8.45649	8.50068	8.55842	8.86303	7.78868	8.7485
A_09_P013621	euchromatic gene	9.86419	8.27025	9.94695	9.19112	9.76555	9.71642	9.84409	9.75271	9.87281	9.67579	9.96171	9.29888	9.5036	9.52811	9.59109	9.46287	9.318	9.51911	9.72235	8.58038	9.86955
A_09_P013626	euchromatic gene	11.6828	11.1922	11.9595	11.9975	11.9553	12.0646	11.8808	12.3907	11.8195	12.5998	11.9996	11.3005	11.4435	11.6049	12.0496	13.0482	11.2182	12.6874	11.3633	11.2719	11.864
A_09_P013631	euchromatic gene	8.88225	7.59078	9.36491	8.38877	8.67532	8.62585	9.25522	8.87959	8.79413	8.90936	8.81527	8.73172	9.17443	8.85766	8.77258	8.68232	9.20588	8.84604	8.94332	8.13957	9.1712
A_09_P013636	euchromatic gene	8.68938	7.50235	8.70797	8.16909	8.51915	8.36845	8.86211	8.56219	8.4546	8.49944	8.50626	8.42796	8.58276	8.33139	8.49357	8.23283	8.4784	8.36583	8.63124	7.6761	8.72712
A_09_P013641	euchromatic gene	9.24601	7.87608	10.0848	9.06294	9.48918	9.27358	9.56922	9.30179	9.25583	9.27339	9.24283	9.13622	9.16896	9.04916	9.0584	9.00813	9.09441	9.11918	9.57466	8.18273	9.65317
A_09_P013646	euchromatic gene	10.2209	9.18421	10.3616	9.38094	10.1142	10.2109	9.79969	10.2049	10.2526	10.2189	10.4344	9.3295	9.30582	9.99027	10.1199	10.0341	9.24843	10.1393	9.48077	8.66462	9.7959
A_09_P013656	euchromatic gene	9.26489	7.87598	9.88558	8.83303	9.43277	9.3299	9.54396	9.45707	9.49585	9.32834	9.63348	9.0381	9.17025	9.24442	9.26874	8.95407	9.00605	9.23989	9.20891	8.01009	9.35027
A_09_P013661	euchromatic gene	9.34672	7.87483	9.38784	8.56172	9.3653	9.55633	9.54299	9.25594	9.44437	9.24118	9.64756	9.08485	9.16872	9.15739	9.02727	9.07237	9.24718	9.18603	9.40943	8.06206	9.4442
A_09_P013666	euchromatic gene	8.99875	8.03079	8.91539	8.25962	8.69688	8.63105	9.35634	8.88207	8.739	8.93389	8.67592	8.79317	8.90072	8.82604	8.66961	8.60873	8.76327	8.81348	9.07709	7.88532	9.25494
A_09_P013671	euchromatic gene	8.51861	7.56928	9.45703	8.78819	8.6323	8.65473	8.98565	8.69734	8.56909	8.73135	8.55444	8.4495	8.73795	8.4173	8.42181	8.6857	8.63392	8.60852	8.78904	7.61079	8.84142
A_09_P013676	euchromatic gene	9.6217	8.39793	8.90019	8.34392	8.92843	8.90757	9.70368	9.10172	9.10074	9.43894	9.12325	9.43404	9.52944	9.30929	9.30743	8.98914	9.30354	9.03353	9.48885	8.66944	9.74465
A_09_P013681	euchromatic gene	9.06867	7.74887	9.21933	8.29075	9.32777	9.06001	9.5054	9.04789	9.11964	9.02141	9.14532	8.89717	9.1298	8.78733	8.89064	8.6783	8.96918	8.76518	9.12155	7.95958	9.50543
A_09_P013686	euchromatic gene	8.43383	7.26154	8.60362	8.15899	8.2759	8.30924	8.78061	8.45273	8.3364	8.36986	7.82928	8.16196	8.40399	8.347	8.25864	8.02449	8.38009	8.35816	8.49561	7.5376	8.71087
A_09_P013691	euchromatic gene	9.40674	7.82312	9.62259	8.50208	9.49732	9.20759	9.67554	9.33023	9.35757	9.25919	9.43006	9.14456	9.22867	9.06861	9.15971	9.05259	9.1428	9.27127	9.3748	8.21788	9.63984
A_09_P013696	euchromatic gene	9.27877	7.74862	9.0618	8.33637	9.12498	8.97351	9.53161	9.13394	9.07126	9.28493	9.07307	8.84347	9.054	9.15535	9.19169	8.88145	8.90469	9.0189	9.12706	7.91467	9.25821
A_09_P013701	euchromatic gene	10.4695	8.61335	10.4972	9.12207	10.2852	10.3239	10.6607	10.1494	10.5524	10.1764	10.6368	10.2154	10.1961	10.0633	10.1237	9.88725	10.0393	9.96026	10.4755	8.96612	10.4349
A_09_P013706	euchromatic gene	9.52205	8.56086	9.73633	8.93026	9.24062	9.28834	10.0663	9.62479	9.22587	9.4335	9.23497	9.27634	9.37352	9.28074	9.02137	8.98017	9.37948	9.19202	9.67777	8.60855	9.8043
A_09_P013711	euchromatic gene	8.64211	7.56645	8.75992	8.20569	8.78355	8.69638	9.04635	8.70386	8.79312	8.89275	8.75457	8.5295	8.71708	8.67546	8.66253	8.46186	8.64258	8.73679	8.761	8.07628	8.8062
A_09_P013716	euchromatic gene	10.0184	8.37045	9.67733	8.69107	9.82403	9.80271	10.1635	9.82407	9.82138	9.97506	9.90717	9.54442	9.56147	10.0379	9.96103	9.69311	9.51482	9.65915	9.68272	8.40486	9.90867
A_09_P013721	euchromatic gene	8.01896	7.16462	8.12963	7.58325	8.07718	8.04137	8.51231	7.91637	7.98601	8.02086	8.0223	7.89398	8.07439	8.01729	7.98457	7.82306	8.19332	7.95014	8.09236	7.33356	8.21058
A_09_P013726	euchromatic gene	9.34109	7.78738	9.58881	8.60062	9.25334	9.28711	9.67528	9.50751	9.45442	9.50646	9.16148	9.19042	9.37182	9.26362	9.39202	9.07612	9.23512	9.03109	9.58768	8.09498	9.48386
A_09_P013731	euchromatic gene	10.1277	8.49353	10.2071	9.25943	9.85019	9.854	10.3297	9.88684	9.96221	10.0431	10.0911	9.71225	9.91779	9.86384	9.77822	9.5843	9.92013	9.70713	10.0954	8.80485	10.2248
A_09_P013736	euchromatic gene	9.65928	7.8496	9.69897	8.47221	9.70087	9.63932	9.55788	9.43475	9.82153	9.7721	9.78522	8.9521	9.06229	9.32671	9.24781	9.09835	8.95988	9.20602	9.61924	7.99587	9.73167
A_09_P013741	euchromatic gene	9.66615	8.16926	9.5732	8.79537	9.40082	9.26259	9.95799	9.66174	9.40711	9.95065	9.43718	9.4883	9.61008	9.57006	9.53832	9.47114	9.48533	9.53746	9.87201	8.75217	9.76908
A_09_P013746	euchromatic gene	9.52611	8.23816	9.81456	8.96112	9.22368	9.18236	9.60855	9.38526	9.23219	9.43487	9.27205	9.05876	8.90197	9.15624	9.38201	8.99856	9.12445	9.07011	9.51039	8.14328	9.48727
A_09_P013751	euchromatic gene	10.7657	8.55788	10.5509	9.31143	10.4467	10.5406	10.7296	10.487	10.5676	10.5769	10.597	10.0745	10.1997	10.4451	10.3385	10.3916	10.0051	10.2172	10.3902	8.78244	10.3359
A_09_P013756	euchromatic gene	9.23782	7.78913	9.67131	8.74045	9.64545	9.93299	9.91751	9.50294	9.59173	9.36755	9.80183	9.32851	9.32096	9.44118	9.35041	9.27843	9.26842	9.16704	9.42624	8.37451	9.55635
A_09_P013761	euchromatic gene	9.63933	8.49571	10.4724	9.75657	10.1132	10.2687	9.93553	9.8797	10.2021	9.72086	10.3979	9.57607	9.29475	9.66046	9.56401	9.51558	9.23439	9.50912	9.58793	8.89851	9.76168
A_09_P013766	euchromatic gene	9.21224	7.69428	9.45191	8.45215	9.23648	8.95917	9.29844	8.90192	9.08278	8.96784	9.07465	8.80984	8.89116	8.67539	8.64235	8.51871	8.83981	8.80415	9.0912	7.98078	9.02328
A_09_P013771	euchromatic gene	9.33601	7.78253	9.19507	8.46904	9.06723	9.06281	9.84291	9.57524	9.1642	9.43866	9.18951	9.22455	9.23074	9.25064	9.41669	9.31875	9.20813	9.26312	9.47299	8.38937	9.50208
A_09_P013776	euchromatic gene	8.77237	7.83864	9.21665	8.52032	9.0195	9.09087	9.23414	8.92008	8.96978	8.62323	9.20096	8.9253	8.8499	8.73839	8.68619	8.73622	8.76343	8.55156	8.99716	8.10397	8.97318
A_09_P013781	euchromatic gene	9.90955	8.11531	9.9331	8.79638	9.81162	9.97188	10.2188	9.73996	9.91041	9.85648	9.98949	9.67284	9.70241	9.71123	9.74406	9.76331	9.68678	9.68054	9.90068	8.50745	10.2668
A_09_P013786	euchromatic gene	9.79647	7.94736	10.3792	9.25147	9.5908	9.50077	10.1188	9.73658	9.72534	9.8038	9.63225	9.49127	9.56317	9.54243	9.68579	9.60467	9.3064	9.67806	9.79633	8.26179	9.78519
A_09_P013791	euchromatic gene	8.76013	7.50424	9.2339	8.39196	8.67097	8.56524	8.83792	8.55441	8.5304	8.39232	8.51567	8.51607	8.60607	8.44121	8.39859	8.41752	8.52944	8.36212	8.81494	7.67618	8.86763
A_09_P013806	euchromatic gene	9.71502	8.107	9.89496	8.95975	9.75279	9.89803	10.4063	9.8509	9.9846	9.85377	10.0621	9.36591	9.52346	9.58154	9.52191	9.6286	9.40387	9.6131	9.86536	8.42759	9.69434
A_09_P013811	euchromatic gene	10.2164	9.25355	10.8776	10.5101	10.7278	10.7454	9.99794	10.6492	10.6692	10.6092	10.7164	9.76601	9.82536	10.2831	10.3591	10.5593	9.67509	10.4956	10.1944	9.46928	10.4502
A_09_P013816	euchromatic gene	8.96877	7.58896	9.5518	8.68412	8.97621	8.87804	9.38627	8.84031	8.95254	8.78815	8.8096	8.69744	8.81131	8.67516	8.61837	8.49232	8.78744	8.65165	9.0302	7.86116	9.05908
A_09_P013821	euchromatic gene	10.023	8.19819	9.90843	8.78806	9.84424	9.71663	10.2547	10.0624	9.86598	9.95954	9.90589	9.6697	9.86564	9.85217	9.82404	9.74283	9.73225	9.7418	10.0445	8.67156	10.1164
A_09_P013826	euchromatic gene	9.6849	8.01278	8.44248	8.67525	9.28421	9.2628	9.91834	9.65459	9.17917	9.71498	8.25013	8.49217	9.4502	9.59904	8.75554	8.67717	9.4127	9.42763	9.61828	8.54097	9.72421
A_09_P013831	euchromatic gene	9.95933	8.1581	10.0346	8.7866	10.0001	10.2445	10.2056	9.77207	10.1982	9.94626	10.2939	9.71683	9.82058	9.748	9.67642	9.70641	9.73226	9.61513	10.0439	8.41038	9.95207
A_09_P013836	euchromatic gene	9.51892	7.91717	9.92861	8.81234	9.26182	9.57681	9.67369	9.52428	9.62448	9.24754	9.9042	9.2966	9.25674	9.39645	9.26532	9.14196	9.26745	9.13699	9.53731	8.08446	9.44796
A_09_P013841	euchromatic gene	9.50049	8.07058	9.94375	8.70973	9.57965	9.7062	9.8679	9.44673	9.69457	9.38419	9.84572	9.24053	9.53915	9.36536	9.3534	9.16177	9.3166	9.35041	9.59665	8.2417	9.61453
A_09_P013846	euchromatic gene	9.42973	7.95395	9.94126	8.86716	9.47139	9.74339	10.1208	9.64245	9.51552	9.55922	9.71777	9.4437	9.58797	9.57865	9.52058	9.56061	9.46203	9.45386	9.75226	8.32177	9.87359
A_09_P013851	euchromatic gene	9.94292	8.35361	10.2178	9.10722	9.72013	9.88927	9.70234	9.89808	9.89547	9.77916	9.89316	9.39211	9.41291	9.50708	9.49341	9.58139	9.39953	9.60294	9.72637	8.45939	9.7792
A_09_P013856	euchromatic gene	8.84651	7.65577	8.46062	7.95153	8.49119	8.55164	9.01133	8.59233	8.55833	8.51704	8.65017	8.28598	8.49076	8.35599	8.23085	8.3452	8.4422	8.42199	8.68144	7.49045	8.56762
A_09_P013861	euchromatic gene	9.61251	8.18983	9.93913	8.69544	9.56095	9.60781	9.88795	9.59942	9.65007	9.28467	9.71226	9.30903	9.33241	9.30863	9.23989	9.31285	9.29885	9.19897	9.61574	8.28735	9.59754
A_09_P013866	euchromatic gene	11.2861	10.4666	11.1724	11.097	11.3834	11.4933	11.7177	11.5101	11.4505	11.6408	11.6051	11.1269	11.1666	11.3068	11.483	11.806	11.0647	11.5585	11.2038	10.8369	11.5265
A_09_P013871	euchromatic gene	9.44059	7.90464	9.73591	8.47016	9.44063	9.64174	9.52495	9.35608	9.50749	9.39141	9.7614	9.22297	9.31883	9.32441	9.52017	9.27106	9.28921	9.29025	9.70965	8.16025	9.71606
A_09_P013876	euchromatic gene	11.9657	11.4569	11.4896	11.2686	11.3058	11.5598	11.3952	11.5728	11.4375	11.3899	11.4596	11.391	11.1719	11.2932	11.3388	11.5037	11.3718	11.4491	11.3525	11.304	11.6019
A_09_P013886	euchromatic gene	9.05526	7.8138	9.09875	8.25953	8.75874	8.63463	9.15839	8.80406	8.91327	8.75966	8.92286	8.71796	8.92446	8.67084	8.82923	8.61068	8.82664	8.79407	9.02469	7.91748	9.20739
A_09_P013891	euchromatic gene	9.61738	8.29935	9.77341	8.98698	9.64935	9.78631	9.49436	9.47121	9.79274	9.54428	9.73717	9.10862	9.15312	9.45952	9.36064	9.27771	9.20037	9.17673	9.55025	9.44546	9.58488
A_09_P013896	euchromatic gene	10.1186	8.46511	10.2694	8.84964	10.127	10.2205	10.2818	10.1856	10.1507	10.1823	10.2457	9.58698	9.65915	9.7585	9.84485	9.98548	9.62261	9.9854	9.88476	8.38332	9.96416
A_09_P013901	euchromatic gene	8.11765	7.0492	8.42513	8.11192	8.23704	8.02475	8.55895	7.85995	8.12789	8.11627	8.04572	7.74909	7.98665	8.00652	7.95262	7.95108	8.0366	8.05915	8.05624	7.3588	8.15321
A_09_P013906	euchromatic gene	7.94081	7.21879	8.39186	7.93135	7.91535	7.89902	8.4821	7.99918	7.98212	8.11571	7.9038	8.00785	8.21893	8.06104	8.02298	8.01389	8.11302	7.98359	8.29735	7.58611	8.24289
A_09_P013911	euchromatic gene	11.3965	10.7448	11.2854	11.2333	11.615	11.513	11.6769	11.623	11.5204	11.9459	11.4745	11.2257	11.2823	11.6439	11.6944	12.0227	11.2909	11.7708	11.2696	11.3178	11.9159
A_09_P013916	euchromatic gene	9.72181	8.44907	10.2374	9.06212	9.88168	10.0309	10.0776	9.87734	9.95601	9.72755	10.0836	9.45529	9.42559	9.62532	9.47293	9.52224	9.45024	9.53677	9.87353	8.38405	9.74234
A_09_P013921	euchromatic gene	9.55768	8.0271	9.91916	8.80281	9.4687	9.49441	9.61553	9.32935	9.60657	9.36756	9.44303	9.20717	9.39338	9.2504	9.1444	9.16784	9.34586	9.14962	9.60792	8.37986	9.66778
A_09_P013926	euchromatic gene	9.2451	7.71375	9.22458	8.36196	9.13888	9.0714	9.51935	9.3995	9.18721	9.35277	9.14318	8.95086	9.06365	8.91216	8.97274	8.98067	8.9253	9.13292	9.23325	8.13886	9.25189
A_09_P013931	euchromatic gene	9.18158	7.94236	9.45488	8.58014	9.12756	9.31997	8.91616	9.29605	9.28454	8.92785	9.43473	8.3221	8.37215	9.16287	8.97909	8.96631	8.32542	8.90393	8.59346	7.51979	8.62432
A_09_P013936	euchromatic gene	9.84149	8.11604	9.97507	8.98976	9.58449	9.53301	10.0574	9.65271	9.75377	9.73752	9.82707	9.59521	9.66695	9.53181	9.59129	9.43058	9.58321	9.40728	9.8905	8.41035	9.94045
A_09_P013941	euchromatic gene	8.93186	7.55242	8.9433	8.35177	8.56986	8.53798	9.36265	9.35901	8.9779	9.13393	8.93629	8.758	9.04217	8.75374	8.76978	8.91515	8.88845	9.01572	9.19988	7.9456	9.14873
A_09_P013946	euchromatic gene	10.1221	8.28273	10.1954	9.01401	9.99141	10.3202	10.2962	10.1157	10.325	10.1604	10.6784	10.1434	9.64161	10.0248	10.1346	10.0112	9.59001	10.0099	9.76711	8.32589	9.89366
A_09_P013951	euchromatic gene	8.80928	7.4896	9.54745	8.65324	8.8636	8.87011	9.24162	9.09357	9.27193	9.12087	8.95359	8.40949	8.77513	8.75894	8.92454	9.00405	8.78149	8.94772	8.90336	7.68869	8.82957
A_09_P013956	euchromatic gene	10.2162	8.32653	10.1563	8.98658	9.95618	9.92048	10.4165	10.1427	10.1474	10.1544	10.1374	9.96234	9.95845	10.0833	10.151	9.78577	9.85925	9.89369	10.2016	8.62645	10.303
A_09_P013961	euchromatic gene	10.651	9.93793	10.6577	9.30169	10.5687	10.4595	10.5486	10.4499	10.5017	10.4484	10.5759	10.1477	10.1671	10.2665	10.5019	10.103	10.1136	10.177	10.4187	10.3512	10.5937
A_09_P013981	euchromatic gene	9.17051	7.65979	8.91787	8.49601	8.57079	8.72593	9.01054	8.60582	8.70797	8.97648	8.51781	8.99329	9.07866	8.662	8.75752	8.47297	9.0629	8.7273	9.23751	7.92234	9.17205
A_09_P013986	euchromatic gene	11.5723	10.052	11.5122	10.7835	11.9515	12.3287	11.1242	11.6275	11.9869	11.631	12.2501	10.3584	10.4269	11.4993	11.3631	11.5845	10.3577	11.3323	10.7594	9.67922	11.1871
A_09_P013991	euchromatic gene	9.01093	7.63118	8.35153	8.26692	8.87645	8.86918	9.5056	8.52043	9.05245	8.84863	9.05787	8.9005	9.03514	8.28848	9.68188	8.76782	8.934	8.87425	8.96254	7.91526	9.43323
A_09_P013996	euchromatic gene	9.22134	7.79457	9.76326	8.92886	9.42749	9.41811	9.70756	9.31268	9.36716	9.31382	9.3717	9.03464	9.12224	9.2461	9.25372	9.03236	9.13644	9.24167	9.38808	8.31212	9.642
A_09_P014001	euchromatic gene	8.37101	7.26191	8.53141	8.0514	8.30921	8.29481	8.787	8.75433	8.21415	8.12898	8.23876	8.40921	8.34771	8.3418	8.07112	8.20206	8.37144	8.1921	8.05474	7.58361	8.70527
A_09_P014006	euchromatic gene	9.70742	9.32654	9.99213	9.71616	9.7337	9.86744	10.008	9.76536	10.0677	9.82581	10.1834	9.70786	9.57913	9.72721	9.64584	9.88909	9.61697	9.83614	9.72087	9.06965	10.0384
A_09_P014011	euchromatic gene	8.3913	7.26271	9.11312	8.46792	8.39179	8.27266	8.90105	8.48964	8.5795	8.48206	8.37621	8.09488	8.40254	8.57151	8.41481	8.32251	8.46633	8.34187	8.65566	7.59945	8.86757
A_09_P014016	euchromatic gene	10.7223	9.99065	10.4274	10.3073	10.9277	10.8918	9.87063	11.0126	11.1166	10.9968	11.0289	9.75049	9.74253	10.688	10.6442	10.6884	9.71815	10.8735	9.94686	9.4908	10.1288
A_09_P014026	euchromatic gene	10.0392	9.27916	10.3184	9.06812	9.84801	10.1158	10.1907	9.96064	10.1558	9.93334	10.1397	9.90473	9.97229	9.76861	9.72408	9.68055	9.86438	9.76765	10.1861	8.64832	10.2796
A_09_P014031	euchromatic gene	10.41	8.95358	10.8639	9.52884	10.4151	10.6059	10.4236	10.383	10.6734	10.4568	10.7273	9.967	10.0643	10.1697	10.2766	10.2025	9.78606	10.2395	10.235	8.65926	10.3332
A_09_P014036	euchromatic gene	9.02557	7.63262	9.42684	8.46923	9.22024	9.35152	9.50623	8.97432	9.25526	9.13367	9.55205	8.95836	9.05303	9.04134	8.97203	8.93313	8.98746	8.99376	9.41214	7.95366	9.42591
A_09_P014041	euchromatic gene	8.48179	7.30428	8.78807	7.85167	8.61905	8.68443	9.2385	8.34585	8.38253	8.51175	8.51994	8.28231	8.60844	8.51533	8.54404	8.59017	8.39678	8.64037	8.57934	7.53829	9.01718
A_09_P014046	euchromatic gene	10.1632	9.3026	10.2165	9.80718	9.91891	9.69096	11.3689	10.2581	9.85245	10.4223	9.79597	10.2324	10.1076	10.1307	9.7015	9.88609	10.4284	10.0211	10.4957	10.3015	10.9752
A_09_P014051	euchromatic gene	9.95083	8.45051	9.8215	9.03833	9.86659	9.99798	10.0413	9.9659	10.1501	10.0292	10.3407	9.59701	9.61409	9.98711	9.80936	9.88713	9.44443	9.77826	9.68848	8.4329	10.1082
A_09_P014056	euchromatic gene	9.81735	8.23751	9.90546	9.00445	9.63382	9.45041	9.69856	9.61229	9.76512	9.5961	9.85114	9.23878	9.36103	9.24444	9.50395	9.17887	9.36394	9.40523	9.64759	8.45917	9.87358
A_09_P014061	euchromatic gene	5.33573	5.63992	5.97173	6.36877	7.02786	7.02363	6.27076	5.38025	5.71903	5.66624	5.74207	5.62569	6.06796	6.10039	6.12008	6.13085	6.11731	6.25088	6.68775	5.72733	5.49194
A_09_P014071	euchromatic gene	10.2326	8.45504	10.6361	9.40596	10.394	10.5121	10.6134	10.572	10.6252	10.5487	10.7953	9.84903	10.0481	10.278	10.2821	10.1612	9.7563	10.1258	10.155	8.5941	10.4466
A_09_P014076	euchromatic gene	9.23139	7.6724	8.94841	8.27175	9.21445	8.9367	9.32165	9.0044	9.02302	9.17083	9.09497	8.80355	8.90978	8.88521	8.88121	8.81041	8.90088	8.93624	9.15579	7.93925	9.42992
A_09_P014081	euchromatic gene	9.32235	7.82446	9.41867	8.32938	9.19134	9.38425	9.52507	9.37406	9.39744	9.3087	9.53006	9.11118	9.25243	9.12084	9.19607	9.09358	9.11033	9.14672	9.40456	8.17791	9.69634
A_09_P014091	euchromatic gene	9.82198	8.07323	10.2035	8.88559	9.807	9.91094	10.0165	9.79806	9.94814	9.73522	10.1235	9.642	9.65368	9.65594	9.70488	9.6676	9.57655	9.68208	9.94868	8.36636	9.88596
A_09_P014096	euchromatic gene	9.69593	7.91655	9.99682	8.80765	9.87637	10.1517	10.1468	9.72719	9.8486	9.60534	10.0139	9.21973	9.33604	9.59767	9.54312	9.6395	9.27882	9.45342	9.65654	8.06245	9.83395
A_09_P014101	euchromatic gene	9.69786	8.11886	9.72885	8.70961	9.63806	9.83885	10.0871	9.84585	9.7923	9.68238	9.97281	9.47979	9.41741	9.57877	9.40783	9.56547	9.44066	9.445	9.67232	8.4044	9.89012
A_09_P014106	euchromatic gene	9.3389	7.81094	9.77859	8.67435	9.49849	9.70377	9.86181	9.36661	9.55404	9.23566	9.69321	9.2521	9.34732	9.42456	9.27795	9.31358	9.20672	9.16546	9.40103	8.1119	9.8014
A_09_P014111	euchromatic gene	9.50822	7.94115	9.83221	8.55694	9.43372	9.61292	9.78079	9.43402	9.69688	9.53496	9.75945	9.4411	9.58663	9.31417	9.38151	9.29902	9.39112	9.2853	9.78574	8.34778	9.97805
A_09_P014116	euchromatic gene	9.92347	8.22671	10.0639	9.01476	9.72378	9.91194	9.96084	9.76184	9.96021	9.64437	10.1345	9.68821	9.80018	9.67849	9.63508	9.57818	9.66672	9.52596	10.1021	8.47768	10.1035
A_09_P014121	euchromatic gene	9.05717	7.8161	9.18951	8.32581	9.03787	9.08727	8.82755	9.0836	9.11928	9.04006	9.17101	8.76187	8.98349	8.83841	8.89724	8.93145	8.84638	8.96286	9.03994	7.91313	9.08138
A_09_P014126	euchromatic gene	9.92047	8.49941	10.0513	9.12831	9.948	9.79722	10.1335	9.7992	9.88259	9.83607	10.0998	9.73731	9.88141	9.75027	9.81278	9.48549	9.79947	9.54415	9.96359	8.85696	10.4032
A_09_P014131	euchromatic gene	9.79606	8.7797	9.6348	8.89062	9.64248	9.32061	10.0026	9.60149	9.44587	9.59254	9.4716	9.40887	9.56307	9.4316	9.42538	9.18046	9.4758	9.24425	9.71432	8.91247	9.91827
A_09_P014136	euchromatic gene	10.5905	8.64179	10.6718	9.39612	10.3999	10.3906	10.4746	10.5139	10.4292	10.4678	10.5338	10.1086	10.152	10.3359	10.4036	10.2988	9.81374	10.3289	10.405	8.70871	10.766
A_09_P014141	euchromatic gene	10.2316	8.3036	10.2893	9.29496	10.2218	10.4853	10.6153	10.3633	10.3083	10.3364	10.3291	9.98633	10.0859	10.0188	10.0969	9.98679	9.89826	10.0971	10.3223	8.82236	10.5037
A_09_P014146	euchromatic gene	10.5184	9.02092	10.1191	9.44516	10.2452	10.2704	10.3875	10.4885	10.4545	10.5194	10.5325	9.91423	9.99826	10.3379	10.409	10.0673	9.76755	10.3038	10.1499	8.91065	10.4709
A_09_P014151	euchromatic gene	10.4343	9.64061	10.4018	9.94239	10.1623	10.2267	10.6059	10.3384	10.3631	10.3225	10.3508	10.3564	10.3028	10.1108	10.1496	10.058	10.4859	10.1583	10.4533	10.1556	10.6139
A_09_P014156	euchromatic gene	9.77368	8.18793	9.91408	8.83777	9.77027	9.94323	10.0775	9.78804	9.89366	9.75218	9.86277	9.56103	9.65277	9.60694	9.61585	9.70589	9.55512	9.51796	9.80576	8.50609	10.1258
A_09_P014161	euchromatic gene	10.7121	9.04457	10.1915	9.20201	10.8274	10.9615	10.0345	10.4608	11.0992	10.5603	11.1152	9.6581	9.5953	10.3944	10.1893	10.077	9.49449	10.1812	9.84356	8.51644	10.0962
A_09_P014166	euchromatic gene	8.67236	7.42838	8.34676	7.94197	8.58367	8.29375	8.76254	8.37276	8.63655	8.4421	8.38517	8.32706	8.40434	8.57505	8.47493	8.22781	8.30199	8.31015	8.38227	7.64291	8.50514
A_09_P014176	euchromatic gene	9.69888	8.31511	9.827	8.54503	9.64874	9.9769	9.3922	9.7049	9.92163	9.52218	10.096	8.9784	8.85084	9.5548	9.29059	9.45266	8.86364	9.35513	9.15769	7.72078	9.43791
A_09_P014181	euchromatic gene	8.86997	7.66702	8.84479	8.31215	8.70996	8.62624	9.40746	8.84051	8.78694	8.92109	8.96249	8.81168	9.03687	8.94243	8.78132	8.81106	8.90489	8.86494	9.04854	8.01061	9.24984
A_09_P014186	euchromatic gene	9.60763	7.95068	9.86069	8.59869	9.94074	9.97191	9.45021	9.94467	9.95189	9.8131	10.1039	8.73958	8.80807	9.64656	9.60375	9.34307	8.86037	9.45543	9.19445	7.50852	9.25559
A_09_P014191	euchromatic gene	10.1089	9.117	10.1306	8.96443	10.1401	9.9325	10.4504	10.2622	9.99	10.3952	10.1319	10.1116	9.99669	10.0729	10.1428	10.1758	9.90057	10.2148	10.2311	9.71706	10.7744
A_09_P014196	euchromatic gene	9.79516	8.93932	10.9291	10.2345	10.7602	10.8418	10.9315	10.815	10.8334	10.5459	10.508	9.98556	10.059	9.94397	9.96121	10.6556	9.95206	10.4861	10.1716	9.44329	10.5739
A_09_P014201	euchromatic gene	9.24997	7.80398	9.77982	8.78126	9.47814	9.4599	9.62425	9.38536	9.52303	9.36467	9.7133	9.02858	9.10079	9.33983	9.90306	9.08267	9.06997	9.12688	9.31767	8.02416	9.52063
A_09_P014206	euchromatic gene	11.1133	10.3143	11.1032	10.6223	10.9552	10.9604	11.2668	11.1315	11.0414	11.137	11.0852	10.9234	10.8658	11.0175	11.0267	11.0695	10.77	11.1856	10.9979	10.6576	11.449
A_09_P014211	euchromatic gene	9.01277	7.81528	9.3844	8.43496	9.13753	9.1982	9.08424	9.06227	9.15766	9.08187	9.16703	8.34025	8.60687	8.84912	8.82695	8.80808	8.59288	9.00045	8.89301	7.61032	8.95829
A_09_P014216	euchromatic gene	10.5026	8.53844	10.6989	9.5763	10.3498	10.1784	11.1383	10.3495	10.3103	10.5405	10.6067	10.0718	9.04107	10.2063	10.3443	10.0339	10.0608	10.0848	10.3776	8.84804	11.041
A_09_P014221	euchromatic gene	9.01345	7.67059	9.03284	8.31868	9.0507	9.23058	9.39398	8.91749	9.09484	9.04576	9.3368	8.80981	9.00604	8.9038	8.9544	8.9416	8.92467	9.00921	9.21967	7.92524	9.33035
A_09_P014226	euchromatic gene	8.97621	7.71452	8.27301	8.32823	9.05068	9.2847	9.18652	8.97409	9.29132	9.08768	9.51734	8.9303	8.95758	8.85664	8.94161	8.9319	8.84514	8.96107	9.2138	8.0159	9.39349
A_09_P014231	euchromatic gene	9.7698	7.96618	9.91321	8.84724	9.6714	9.68258	10.126	9.60043	9.79087	9.70056	9.96297	9.48957	9.59969	9.65773	9.50521	9.40533	9.47145	9.45134	9.82347	8.29208	9.92473
A_09_P014241	euchromatic gene	9.45927	8.04807	10.026	8.9716	9.31937	9.27383	9.5694	9.48859	9.34483	9.14458	9.43293	9.19789	9.24349	9.02317	8.87497	9.00042	9.17594	8.97162	9.73046	8.26172	9.88027
A_09_P015631	euchromatic gene	9.53323	7.86331	9.97181	8.68548	9.73152	9.62694	10.0028	9.679	9.63953	9.65177	9.59005	9.37151	9.37168	9.52202	9.4634	9.41122	9.35878	9.38048	9.76894	8.33029	9.98727
A_09_P016556	euchromatic gene	10.9699	9.4119	10.8585	10.1132	10.8677	10.7957	10.9909	11.0207	10.8754	11.0717	11.0231	10.633	10.6811	10.8462	11.0332	10.8067	10.555	10.8198	10.7785	9.70625	11.2571
A_09_P016561	euchromatic gene	10.2182	8.42599	9.87919	8.35779	10.2438	10.277	9.31294	9.70699	10.1388	10.0387	10.625	9.10102	9.1445	9.87103	10.1108	9.68511	8.91337	9.7262	9.28004	7.76854	9.38313
A_09_P016566	euchromatic gene	9.67706	8.09594	9.89473	8.85007	9.63743	9.63398	10.0656	9.63468	9.76206	9.6735	9.75612	9.53019	9.6285	9.68256	9.4963	9.37775	9.5243	9.53252	9.85301	8.45647	9.85018
A_09_P016646	euchromatic gene	10.0256	8.43753	10.0521	9.09952	9.80899	9.79951	10.3893	10.1134	9.93448	10.0215	9.99986	9.82034	9.92358	9.80706	9.95313	9.82401	9.77628	9.83974	10.1557	9.00691	10.1904
A_09_P016651	euchromatic gene	10.0109	8.50838	10.3472	9.4115	10.1852	10.3902	10.2043	10.0056	10.1578	10.1361	10.2423	9.60394	9.65758	9.74853	9.79237	9.91227	9.64122	9.86705	9.95057	8.66745	9.98587
A_09_P016656	euchromatic gene	10.3986	9.50858	10.9798	10.3407	10.5902	10.7685	10.6576	10.8403	10.4241	10.8059	10.6539	10.6093	10.3014	10.2116	10.2046	10.5055	10.4501	10.5229	10.5834	10.2565	10.9033
A_09_P016661	euchromatic gene	10.0406	8.22934	9.96984	8.93896	9.64881	9.59217	10.3526	9.88615	9.74263	10.0265	9.8098	9.80012	9.78532	9.83032	9.88908	9.5748	9.68756	9.77353	10.1071	8.64337	10.3651
A_09_P016666	euchromatic gene	9.35944	7.78102	9.34561	8.72022	9.32685	9.31068	9.67814	9.38791	9.46163	9.41516	9.47465	9.09302	9.32788	9.2648	9.18926	9.10443	9.17575	9.18526	9.50396	8.15033	9.77765
A_09_P016671	euchromatic gene	9.15536	7.59878	8.66191	8.11865	8.62874	8.5579	9.47931	9.18109	8.81839	9.23049	8.78046	8.8018	8.95308	8.79812	8.80354	8.98065	8.86876	9.06433	9.43106	7.9784	9.45386
A_09_P016676	euchromatic gene	9.22039	7.93637	9.48819	8.95224	9.06946	9.14263	9.56321	9.15413	9.18874	8.87872	9.32992	9.10563	9.17091	9.0464	8.98064	9.00947	9.178	8.89377	9.38191	8.3106	9.55947
A_09_P016681	euchromatic gene	9.73493	7.92326	9.46282	8.64821	9.49513	9.40786	10.0736	9.825	9.55201	9.67443	9.57161	9.35404	9.48572	9.53585	9.56362	9.52432	9.38528	9.52677	9.77819	8.43798	9.77722
A_09_P016686	euchromatic gene	9.06134	7.93028	9.58162	8.69008	9.04712	9.1181	9.45194	8.92787	8.99323	8.99069	9.07333	8.80437	9.24918	8.8992	9.05564	8.69375	9.22741	9.01667	9.31356	8.74065	9.48742
A_09_P016691	euchromatic gene	8.68957	7.48072	8.83146	8.11851	8.75345	8.84557	8.60979	8.56572	8.68912	8.47292	8.80298	8.27549	8.41293	8.5718	8.40271	8.47536	8.24566	8.44689	8.62018	7.47469	8.70174
A_09_P016696	euchromatic gene	10.1391	8.44534	10.268	9.24208	10.3322	10.4842	10.3336	10.2031	10.5181	10.0271	10.7374	10.022	9.89455	10.1636	10.0299	9.96047	9.92661	9.86389	10.2652	8.78201	10.3933
A_09_P016851	euchromatic gene	10.5207	8.79958	10.6304	9.48362	10.722	10.9649	10.6948	10.2537	10.8629	10.4381	11.1053	10.3476	10.3731	10.3369	10.2397	10.1522	10.2263	10.1753	10.4021	9.44698	11.014
A_09_P016856	euchromatic gene	10.4194	9.92838	11.7922	11.5551	11.5042	11.496	11.1265	11.1115	11.4291	11.1255	11.3264	10.258	10.7075	10.7675	10.9593	11.2188	10.5229	11.2054	10.7092	10.6931	11.1219
A_09_P016861	euchromatic gene	9.87118	7.99579	10.2044	9.0621	9.71479	9.80394	10.0058	9.46938	9.84215	9.49337	9.98653	9.6111	9.68399	9.72834	9.83866	9.39792	9.64857	9.35625	9.98614	8.36688	9.9429
A_09_P016866	euchromatic gene	9.06982	7.78444	9.47241	8.40512	9.12178	8.9499	9.32205	9.05788	9.09754	9.0701	9.20789	8.92274	8.93636	8.87305	8.98203	8.76319	8.90365	8.93886	9.2512	8.0212	9.20659
A_09_P016871	euchromatic gene	9.33333	7.86818	9.28759	8.52168	9.16667	9.07001	9.68431	9.29031	9.18455	9.34919	9.10932	9.1618	9.25296	9.14328	9.02146	8.83841	9.18225	8.95885	9.58563	8.3567	9.79408
A_09_P016876	euchromatic gene	10.022	8.25903	10.1476	9.02496	9.94339	9.9895	10.557	9.98866	10.1698	10.1828	10.0254	9.91482	9.97958	10.0801	10.0834	9.6986	9.86969	9.99985	10.2974	8.65088	10.4546
A_09_P016886	euchromatic gene	10.0518	8.34503	10.6209	9.27141	10.0708	10.1773	10.4818	10.2582	10.2585	10.1157	10.3613	9.99121	10.0859	9.91525	9.97026	9.95205	9.86836	9.84897	10.421	8.62679	10.7035
A_09_P016891	euchromatic gene	9.66324	8.2261	9.75128	8.43955	9.41241	9.53315	9.72144	9.38514	9.367	9.29251	9.58532	9.46076	9.28456	9.09629	9.09081	9.12835	9.13865	9.16471	9.55801	8.18284	9.72684
A_09_P016896	euchromatic gene	9.78743	8.08891	9.96972	8.92886	9.88818	10.0756	10.0068	9.86824	10.1237	9.94347	10.3271	9.33164	9.24093	9.68009	9.47306	9.51887	9.26695	9.521	9.58112	9.62892	9.7632
A_09_P016901	euchromatic gene	10.0036	8.9156	10.3535	9.67075	10.2234	10.3803	10.2618	10.2201	10.1743	10.1713	10.3741	9.71864	9.7955	9.98951	10.0317	10.2872	10.0455	10.308	10.108	9.34099	10.305
A_09_P017071	euchromatic gene	9.72509	8.70192	9.21331	8.5884	9.04197	8.99272	9.70822	9.44023	9.07744	9.45932	9.05822	9.15747	9.34829	9.10598	9.14044	8.91173	9.29021	9.18557	9.60272	8.56951	9.68575
A_09_P017076	euchromatic gene	10.0325	8.70222	10.0073	8.85936	9.68474	9.67584	10.287	10.1083	9.69222	9.97081	9.79425	9.55018	9.47414	9.83018	9.86823	9.9342	9.60394	9.85278	9.77689	9.18725	10.3554
A_09_P017391	euchromatic gene	9.14027	7.80931	9.30861	8.50948	9.0902	9.21476	9.65658	9.02992	9.24299	9.05765	9.32474	9.1434	9.0962	9.02817	9.08973	8.78096	9.0209	8.88312	9.36375	8.06579	9.60967
A_09_P017396	euchromatic gene	8.10259	7.23299	8.46349	8.02958	8.11742	7.85485	8.60925	8.30354	8.07769	8.06178	7.95219	8.11042	8.23666	7.99034	8.08692	7.8429	8.22548	8.02132	8.25086	7.52285	8.52674
A_09_P017456	euchromatic gene	10.3849	8.65522	10.3323	9.57565	10.1583	10.3083	10.7986	10.2445	10.4675	10.3709	10.5259	10.2515	10.2778	10.2857	10.1726	10.1398	10.1252	10.19	10.3998	9.07976	10.7292
A_09_P017461	euchromatic gene	9.78627	8.045	10.1555	8.81504	9.42398	9.25921	10.1677	9.4114	9.72629	9.5038	9.35617	9.26951	9.30081	9.36115	9.18436	9.00525	9.33592	9.1326	10.0499	8.33568	9.99383
A_09_P017466	euchromatic gene	11.4339	9.86707	11.5285	9.95812	11.6108	11.5709	11.5279	11.7333	11.8284	11.5637	11.7419	11.0107	11.0333	11.387	11.6206	11.4721	10.8921	11.1921	11.3182	9.9232	11.6394
A_09_P017471	euchromatic gene	11.6291	11.0599	11.8217	11.734	11.4218	11.8043	12.0354	12.1188	11.7341	12.357	11.7343	11.9247	12.063	12.0098	11.9425	12.2574	12.1011	12.3018	12.0792	12.0244	12.2948
A_09_P017476	euchromatic gene	8.23054	7.01028	8.50869	7.71356	8.29018	8.35623	8.93763	8.47697	8.60022	8.49785	8.63276	8.14685	8.1513	7.95949	7.85036	8.15708	8.20516	8.28869	8.56508	7.53178	8.60797
A_09_P017481	euchromatic gene	9.71833	8.07119	9.87503	8.89155	9.79282	9.6346	9.30023	9.70914	9.78438	9.62698	9.97226	8.90538	8.93587	9.34111	9.37296	9.26747	8.90136	9.40946	9.12572	7.96076	9.53301
A_09_P017486	euchromatic gene	9.4153	7.87883	9.15344	8.52444	9.10945	8.96716	9.50339	9.20149	9.22357	9.2576	9.25777	9.03895	9.15613	9.09612	9.07927	9.12702	8.96185	8.99225	9.20644	8.22132	9.35185
A_09_P017491	euchromatic gene	9.34859	7.79261	10.0911	8.66701	9.54076	9.74321	9.81855	9.45509	9.62912	9.43549	9.61088	9.2074	9.4322	9.35351	9.4256	9.40982	9.28715	9.28567	9.64693	8.17999	9.56368
A_09_P017496	euchromatic gene	9.60148	8.16961	9.94611	8.81475	9.67223	9.6494	9.90446	9.56356	9.76024	9.67271	10.0055	9.40563	9.56471	9.53976	9.73558	9.57982	9.46607	9.59473	9.68238	8.39908	9.6743
A_09_P017501	euchromatic gene	10.1311	8.16661	10.0858	8.97488	10.0669	10.3055	10.4066	10.1017	10.279	10.1208	10.2999	9.82269	9.96177	9.98615	9.71346	9.85049	9.76035	9.7888	10.263	8.55052	10.0611
A_09_P017506	euchromatic gene	9.4098	7.78316	9.20959	8.63837	9.12733	9.05706	9.6571	9.15619	9.12138	9.29654	9.26632	9.03057	9.09132	9.19142	9.10711	9.02294	9.06861	9.07965	9.25014	8.19688	9.18189
A_09_P017511	euchromatic gene	11.1989	10.5715	10.9747	10.4749	11.1378	11.186	11.1487	11.1425	11.2421	11.0713	11.4094	10.562	10.4228	10.762	10.6726	11.0586	10.3488	10.621	10.9301	10.1474	10.9456
A_09_P017516	euchromatic gene	8.85975	7.62256	9.61404	8.73078	9.04103	8.93806	9.12613	8.89761	8.92565	8.99196	9.00709	8.6584	8.82199	8.87168	8.81684	8.80383	8.7223	8.90662	9.09209	8.12326	9.0163
A_09_P017691	euchromatic gene	8.82296	7.36768	8.53647	8.10593	8.77111	8.56739	9.10478	8.90099	8.62162	8.81196	8.63711	8.68144	8.64004	8.82077	8.80383	8.75838	8.54312	8.69441	8.88325	7.75691	8.99614
A_09_P017782	euchromatic gene	10.2865	9.28655	10.2635	9.59449	9.96661	9.87669	10.463	10.1788	9.99385	10.1544	10.1397	10.0008	9.64836	10.2022	10.2205	9.9332	10.0002	9.97472	10.1463	9.63202	10.494
A_09_P017786	euchromatic gene	10.3599	8.38781	10.3577	9.19827	10.1716	10.2098	10.6347	10.1973	10.3533	10.361	10.7016	10.0604	9.12373	10.0961	9.92937	9.93895	10.0134	9.98234	10.448	8.87955	10.6552
A_09_P017791	euchromatic gene	10.2833	8.31521	10.0442	8.90742	9.6247	9.66964	10.2536	9.78585	9.84252	9.94963	10.0098	9.75076	9.82754	9.7697	9.64559	9.74015	9.70347	9.73367	10.0503	8.51672	10.3146
A_09_P017796	euchromatic gene	8.95978	7.82227	9.3386	8.58742	9.19324	9.26037	9.37362	9.11546	9.23099	9.09344	9.58076	8.89235	8.97956	9.07273	8.84992	9.10308	8.90755	8.94405	9.25976	8.5291	9.46146
A_09_P017801	euchromatic gene	9.07672	7.72362	9.01003	8.41477	8.80152	8.68772	9.13724	8.75463	8.72857	8.86089	8.96505	8.59888	8.87147	8.61479	8.52303	8.4461	8.77496	8.62732	9.04183	8.51379	9.20258
A_09_P017806	euchromatic gene	10.3792	8.61199	10.2952	9.39869	10.1153	10.0263	10.629	10.4062	10.2369	10.5396	10.3271	10.1639	10.2022	10.2295	10.2431	10.0682	10.1061	10.3015	10.5098	9.23833	10.7757
A_09_P017811	euchromatic gene	10.5378	8.52899	10.2202	9.0342	10.1115	10.1869	10.5025	10.3348	10.2908	10.4659	10.5455	10.055	10.046	10.2813	10.1815	9.97243	9.9123	10.041	10.2646	8.81138	10.5256
A_09_P017816	euchromatic gene	9.80554	7.91712	9.84837	8.93874	9.45011	9.30268	10.0128	9.50172	9.52452	9.73035	9.64011	9.48905	9.55796	9.52152	9.27864	9.2201	9.4499	9.34018	9.7975	8.39319	10.0584
A_09_P017821	euchromatic gene	9.69077	8.0378	9.60225	8.66402	9.40574	9.24675	9.52983	9.61097	9.47355	9.74803	9.6737	9.23516	9.39812	9.42591	9.55163	9.34121	9.28046	9.4319	9.57994	8.16749	9.81828
A_09_P017826	euchromatic gene	9.77666	7.94253	9.43364	8.54863	9.2766	9.25847	9.97643	9.69025	9.53122	9.6799	9.61286	9.38247	9.4551	9.33967	9.55151	9.27851	9.39764	9.401	9.7441	8.47239	9.79738
A_09_P017831	euchromatic gene	10.3802	8.74316	10.3822	9.22798	10.3358	10.3683	10.3687	10.2253	10.3448	10.1736	10.6742	9.82007	9.97926	10.1004	10.2161	9.81898	9.8597	10.0416	10.285	8.94848	10.4865
A_09_P017836	euchromatic gene	9.58266	8.02373	9.87438	8.54477	9.49214	9.7982	9.87346	9.6298	9.77026	9.54462	10.1059	9.52261	9.38042	9.52998	9.43426	9.2266	9.24608	9.27654	9.65724	8.34702	10.0176
A_09_P017841	euchromatic gene	7.93078	7.42332	8.18552	7.64845	8.31786	8.48285	8.54375	7.99467	8.34996	8.01628	8.59836	7.92993	8.07355	8.11364	7.90655	8.0201	8.31966	8.04183	8.25254	7.34817	8.26275
A_09_P017846	euchromatic gene	9.02985	7.78276	9.33002	8.31368	9.12001	9.37491	9.36952	9.11094	9.34531	8.97282	9.57951	9.02945	8.96088	9.07067	8.97678	8.98032	8.92132	8.93703	9.27082	7.95079	9.44412
A_09_P017851	euchromatic gene	9.06534	7.82811	9.28582	8.31095	8.89844	9.12575	9.21447	8.91986	9.14712	8.97544	9.15024	8.87634	8.94895	8.89401	8.75797	8.73556	8.96465	8.92543	9.26033	8.01594	9.49276
A_09_P017856	euchromatic gene	8.82835	7.70819	9.10797	8.18697	9.09425	9.27351	8.96678	8.81058	9.09634	8.74295	9.42944	8.60948	8.61282	8.8832	8.67778	8.67187	8.67743	8.86793	9.00534	7.84709	9.1722
A_09_P017861	euchromatic gene	9.69969	8.38849	9.44618	8.91963	9.69909	9.43799	9.56002	9.51188	9.57862	9.49221	9.6205	9.2472	9.2645	9.26616	9.3627	9.14006	9.25845	9.28742	9.55174	8.91583	9.72651
A_09_P017866	euchromatic gene	9.06193	7.86007	9.56346	8.67936	8.98375	8.99606	9.37362	9.06044	9.01057	9.0848	9.0787	10.0953	8.95202	8.86276	8.69319	8.8424	8.96226	8.9142	9.4427	8.18397	9.44546
A_09_P017871	euchromatic gene	10.8714	9.39284	10.8207	10.4642	11.058	10.9017	11.1234	10.9628	10.9869	11.0144	11.0771	10.5629	10.5863	10.8001	10.7568	10.9073	10.4862	10.8726	10.6651	9.92514	11.0666
A_09_P017876	euchromatic gene	9.29124	7.78427	9.33607	8.31164	9.33155	9.47023	9.48944	9.3939	9.3567	9.21622	9.71798	8.94845	8.97556	9.09882	8.96134	9.12083	8.98608	9.09464	9.23974	7.90788	9.53641
A_09_P017881	euchromatic gene	8.29146	7.45933	8.2247	7.82513	8.46924	8.49179	8.32334	8.42963	8.51306	8.42879	8.67493	7.61758	7.72	8.55312	8.44696	8.27243	7.74148	8.3407	7.71451	7.00636	8.18706
A_09_P017886	euchromatic gene	8.60048	7.3186	8.47203	8.03765	8.50373	8.33852	8.97154	8.32599	8.48164	8.50535	8.49111	8.34583	8.61557	8.51997	8.31194	8.33922	8.41879	8.41224	8.50869	7.50871	8.7545
A_09_P017891	euchromatic gene	9.90977	8.22254	9.84226	8.98551	9.72227	9.73349	10.2046	10.0525	9.88052	9.91365	9.91224	9.66657	9.74496	9.71634	9.92649	9.67064	9.66344	9.77526	10.0533	8.5826	10.2366
A_09_P017896	euchromatic gene	8.77645	7.54284	8.81471	8.23587	8.6617	8.56928	9.02062	8.7445	8.70903	8.77515	8.74991	8.5058	8.68579	8.89756	8.71434	8.62782	9.22729	8.8087	8.73808	7.81645	9.14961
A_09_P017901	euchromatic gene	9.9462	8.97722	10.462	9.53438	10.0387	10.1238	10.1754	10.1294	10.2081	10.0672	10.3756	9.91698	9.90325	9.87397	9.96645	9.90905	9.78737	9.89124	10.0385	9.21503	10.3315
A_09_P017906	euchromatic gene	8.95049	7.63583	8.81943	8.18705	8.59519	8.85872	9.06667	8.8371	8.82149	8.78466	9.04777	8.78584	8.91961	8.73017	8.74914	8.63681	8.91058	8.63761	9.1985	8.0013	9.3529
A_09_P017911	euchromatic gene	8.90224	7.62427	9.52595	8.59336	9.02448	9.2325	9.432	9.07215	9.13966	8.90673	9.32901	8.88884	8.82192	8.88942	8.69481	8.88319	8.91958	8.82387	9.09786	8.01877	9.43168
A_09_P017916	euchromatic gene	8.46646	7.33733	8.81209	8.28113	8.86291	8.91888	8.94629	8.70313	8.83945	8.54685	8.87208	8.33646	8.53224	8.64051	8.4694	8.70613	8.55579	8.56506	8.62863	7.72092	8.96997
A_09_P017921	euchromatic gene	9.13708	7.73388	8.97304	8.21598	8.89264	8.73118	9.40648	9.21645	8.93743	9.1434	9.04952	8.90392	9.07677	9.14078	9.06785	8.81906	8.96992	8.95156	9.2426	8.03332	9.41452
A_09_P017926	euchromatic gene	9.04366	7.69026	9.06669	8.36697	9.08066	9.13529	9.47091	8.85086	9.16443	9.09899	7.61979	8.86362	9.03173	8.91453	8.96364	8.86908	8.85592	8.79733	9.13916	7.84762	9.22185
A_09_P017931	euchromatic gene	9.18602	7.7968	9.44722	8.81119	8.86375	8.80882	9.73391	9.16746	8.97921	9.2565	8.90504	9.05022	9.21116	9.12735	9.22114	8.93011	9.07381	9.08958	9.38736	8.33356	9.61816
A_09_P017936	euchromatic gene	9.93953	8.10848	10.0158	8.92675	9.86152	9.83594	10.3659	9.91818	9.95958	9.90306	10.0432	9.57513	9.55968	9.63595	9.68933	9.56454	9.54114	9.67805	9.81282	8.43453	10.2081
A_09_P017941	euchromatic gene	10.1657	8.38021	10.5208	9.15066	10.2402	10.374	10.2178	10.0211	10.5137	10.0627	10.7244	9.73991	9.61665	10.0914	10.0759	9.75528	9.42644	9.87237	9.79107	8.41973	10.0871
A_09_P017946	euchromatic gene	9.67043	7.90497	9.51	8.40894	9.55338	9.89238	9.78341	9.42609	9.81905	9.6146	9.80361	9.33802	9.41641	9.36685	9.35457	9.32511	9.31305	9.30639	9.67624	8.18428	9.80979
A_09_P017951	euchromatic gene	10.1429	8.31583	10.0649	8.95115	10.1269	10.2151	10.2998	10.2957	10.278	10.264	10.2961	9.86865	9.8787	10.0325	10.143	9.75596	9.74228	9.9186	10.1275	8.58293	10.3894
A_09_P017966	euchromatic gene	8.99943	7.61355	9.39506	8.51897	8.91574	8.95093	9.11863	8.89841	8.88486	8.72544	9.05576	8.89019	8.95441	8.76786	8.68464	8.656	8.91517	8.65752	9.34416	7.99672	9.38012
A_09_P017971	euchromatic gene	10.7771	8.69522	11.1451	9.26528	10.5893	10.871	10.6625	10.5756	10.9021	10.6584	11.0668	10.4455	10.4102	10.4594	10.4278	10.4168	10.2871	10.2893	10.7458	8.89476	10.9879
A_09_P017976	euchromatic gene	8.22041	7.02504	7.99417	7.77524	7.93596	7.74131	8.44403	7.87359	7.93678	8.04311	7.95589	7.79964	8.13916	8.12949	7.95709	7.87332	8.0932	7.93813	8.03392	7.55219	8.30714
A_09_P017981	euchromatic gene	9.94217	8.71455	10.0006	9.3992	10.1901	10.3107	9.6358	10.0494	10.2785	9.9449	10.3316	9.36179	9.38474	9.92777	9.88787	9.99308	9.37506	9.84481	9.58964	8.67577	9.94841
A_09_P017986	euchromatic gene	9.75205	8.00728	9.46683	8.58633	9.70267	9.61506	9.97067	9.90875	9.80904	9.87996	9.92894	9.51243	9.46827	9.61383	9.76565	9.5295	9.32921	9.63943	9.64012	8.22573	9.9766
A_09_P017991	euchromatic gene	9.61647	8.62058	9.88394	8.98027	9.51283	9.56289	9.75121	9.73879	9.68864	9.56936	9.87841	9.78205	9.41864	9.38061	9.36	9.32499	9.38276	9.40617	9.90389	9.03813	9.7914
A_09_P017996	euchromatic gene	11.6161	10.1531	11.0549	10.4762	11.5552	11.7821	10.8938	11.49	11.9063	11.3599	12.0608	10.476	10.5389	11.5413	11.5963	11.2477	10.337	11.2552	10.7386	9.44415	11.0736
A_09_P018001	euchromatic gene	9.21337	7.74685	9.36006	8.27862	9.26072	9.23726	9.28368	9.13154	9.31816	9.12472	9.35567	8.85929	9.00324	8.98009	9.01001	8.97944	8.99217	8.88099	9.35214	7.90383	9.56417
A_09_P018006	euchromatic gene	9.44806	7.87359	9.81023	8.47261	9.48174	9.7198	9.56335	9.40698	9.7385	9.14929	9.69565	9.33846	9.26728	9.12064	8.9081	9.05577	9.11831	9.03647	9.53841	8.04025	9.80446
A_09_P018011	euchromatic gene	9.44752	8.0828	9.65685	8.71707	9.51432	9.40626	9.50062	9.3452	9.5681	9.31747	9.71365	9.15276	9.26573	9.20061	9.19088	8.9722	9.08723	9.16832	9.44051	8.22079	9.73564
A_09_P018016	euchromatic gene	10.0226	8.13986	10.2359	9.07607	9.80963	9.72887	10.1552	9.7959	9.7823	9.80285	9.88402	9.37526	9.53694	9.60416	9.52159	9.70464	9.42364	9.59516	9.7583	8.49198	10.0006
A_09_P018021	euchromatic gene	9.34164	8.40692	9.63807	9.56095	9.64852	9.81442	9.61778	9.61635	9.7511	9.53951	9.90665	9.02139	9.14909	9.39005	9.39235	9.7004	9.11097	9.61692	9.23761	8.59044	9.59225
A_09_P018026	euchromatic gene	9.54422	8.16098	10.4112	9.32433	9.38299	9.2927	9.54908	9.43984	9.34983	9.23822	9.34351	9.21386	9.32655	8.95889	9.16875	9.07187	9.13781	9.07187	9.58922	8.5937	9.7966
A_09_P018031	euchromatic gene	9.64843	8.15874	10.0759	8.93786	9.54558	9.72624	10.0034	9.68556	9.674	9.47033	9.82033	9.47452	9.56791	9.39669	9.49984	9.53518	9.37998	9.46462	9.83211	8.47495	10.0788
A_09_P018036	euchromatic gene	9.00075	7.67673	8.98158	8.19876	9.03644	9.03653	9.4978	9.08577	9.03019	9.1769	9.11526	8.90755	9.01077	9.00879	8.8988	8.83934	8.88711	8.85337	9.08559	8.13484	9.45681
A_09_P018041	euchromatic gene	12.0651	11.4881	12.4252	12.1709	12.279	12.2301	11.5972	12.1282	12.2274	12.2804	12.2852	11.4514	11.4081	11.9188	12.044	12.3826	11.4547	12.2555	11.6006	11.4229	11.9748
A_09_P018046	euchromatic gene	8.98366	7.62119	8.90815	8.02749	9.027	8.97745	9.46496	9.21461	9.00376	9.30335	9.02554	8.75271	8.94541	9.24961	9.22039	9.03242	8.96623	9.0205	9.29648	7.96835	9.54604
A_09_P018051	euchromatic gene	9.31696	8.50687	9.66416	9.37237	9.46128	9.36791	10.9033	10.3784	9.53243	10.0325	8.96648	10.0457	9.63138	9.82884	9.97417	9.47851	10.3909	10.072	10.1452	10.1818	10.2851
A_09_P018056	euchromatic gene	9.99192	8.49403	10.2208	8.97847	10.0973	10.2474	10.3617	9.91361	10.24	9.7727	10.4773	10.3445	9.71879	9.87184	9.69382	9.65459	9.81745	9.64186	10.2143	8.51036	10.4766
A_09_P018061	euchromatic gene	9.6879	8.47146	9.58292	8.82357	9.50152	9.54074	10.1973	9.76363	9.54764	9.68841	9.61812	9.6714	9.72248	9.62753	9.67933	9.54795	9.60586	9.45585	9.9622	8.60117	10.2321
A_09_P018066	euchromatic gene	10.2845	8.60225	10.3246	9.23695	10.2553	10.2803	10.804	10.289	10.43	10.4284	10.611	10.2323	10.3329	10.3624	10.2449	9.96547	10.3072	10.078	10.5355	8.97351	10.8823
A_09_P018071	euchromatic gene	10.3728	8.53171	10.1474	8.89124	10.4997	10.5555	9.74136	10.2409	10.6127	10.33	10.7772	9.29658	9.39651	10.2449	10.031	10.0248	9.13616	10.0118	9.56051	7.96588	9.97173
A_09_P018076	euchromatic gene	8.92029	8.09842	8.74361	8.17809	8.72804	8.67379	8.84033	8.77954	8.67633	8.74199	8.86603	8.31735	8.48597	8.86807	8.7284	8.57026	8.36073	8.66208	8.46067	7.53357	8.7994
A_09_P018081	euchromatic gene	8.7577	7.53647	8.58928	8.22871	8.7112	8.67647	8.88185	8.89905	8.90135	8.79244	8.99837	8.35123	8.50703	8.64019	8.93363	8.78081	8.47438	8.74931	8.86775	7.50808	9.07898
A_09_P018086	euchromatic gene	9.29642	8.06232	9.45049	8.53763	9.2601	9.44397	9.53701	9.14239	9.49401	9.20035	9.76902	9.03132	9.152	9.17157	8.98651	9.07417	9.10269	9.18717	9.35566	8.28642	9.61537
A_09_P018091	euchromatic gene	9.34077	8.75291	9.60198	9.54781	9.59312	9.67674	9.43348	9.32825	9.51758	9.23783	9.52984	8.97843	9.00446	9.32537	9.15048	9.32895	9.09131	9.27107	9.06554	8.78246	9.71717
A_09_P018096	euchromatic gene	9.55831	7.94518	9.57625	8.19513	9.3989	9.07328	9.54577	9.38665	9.16677	9.31092	9.44214	9.0786	9.05545	9.01103	9.0089	9.10551	9.1287	9.0478	9.46969	8.13744	9.65916
A_09_P018101	euchromatic gene	9.93956	8.39787	10.4062	9.30809	10.1158	10.112	10.033	10.1802	9.88426	10.1075	10.0203	9.6768	9.73605	9.71147	9.91403	9.93245	9.60046	9.9219	9.8866	8.8295	10.2082
A_09_P018106	euchromatic gene	9.97727	8.11338	10.489	9.35006	9.783	9.69513	10.1876	9.78735	9.86466	9.91819	9.80147	9.80066	9.84966	9.65607	9.51927	9.60179	9.64219	9.55356	10.1096	8.67636	10.261
A_09_P018111	euchromatic gene	8.52354	7.34335	8.53082	7.91434	8.39606	8.32152	8.91538	8.54139	8.31157	8.5499	8.48979	8.42486	8.54836	8.35423	8.63653	8.36358	8.43681	8.48928	8.6344	7.58554	8.80862
A_09_P018116	euchromatic gene	8.20923	7.30393	8.08612	7.59807	8.2598	8.33322	8.54974	8.43342	8.25584	8.10943	8.54772	7.95588	7.97952	8.18854	8.08444	8.31776	8.20853	8.23183	8.07593	7.18372	8.35906
A_09_P018121	euchromatic gene	9.12804	8.00847	9.44207	8.67956	9.26261	9.20769	9.37048	9.07326	9.27265	9.17762	9.24849	9.1119	9.11666	8.96816	8.98821	8.97044	8.90092	8.98869	9.39601	8.15098	9.40087
A_09_P018126	euchromatic gene	9.72529	8.29289	9.68523	8.72295	9.54354	9.60228	9.61678	9.44321	9.57054	9.54492	9.70584	9.32169	9.61429	9.44339	9.51409	9.35011	9.55256	9.4562	9.63108	8.43926	9.99289
A_09_P018131	euchromatic gene	9.07466	7.76513	8.92418	8.32094	8.79026	8.83443	9.33682	8.89055	8.96719	9.11379	9.06746	8.84476	9.01452	9.01443	8.95157	8.83037	8.96246	8.91755	9.07691	8.21051	9.39498
A_09_P018136	euchromatic gene	10.1145	8.44932	9.89373	8.86275	9.81636	9.95475	10.5878	10.0749	10.0619	10.1717	10.3018	9.98186	10.1208	9.99505	9.91918	9.99315	9.92311	9.92848	10.2448	8.91859	10.5699
A_09_P018141	euchromatic gene	9.96625	8.05613	9.90731	8.70636	10.1717	10.0507	10.3363	9.93087	10.0561	10.0193	10.2288	9.48977	9.56666	9.7011	9.67705	9.59568	9.53508	9.69691	9.77016	8.23623	10.2279
A_09_P018146	euchromatic gene	10.0041	8.25846	10.6366	9.09218	10.293	10.1319	10.1761	9.99544	10.0688	9.96366	10.2798	9.82584	9.99597	9.76605	9.86256	9.79354	9.83486	9.68057	10.176	8.66368	10.4716
A_09_P018151	euchromatic gene	10.0157	8.94633	10.2926	9.99208	10.4134	10.2171	10.3886	10.3332	10.2691	10.5397	10.4634	9.78665	9.81242	10.0419	10.0258	10.304	9.78369	10.3214	10.1874	9.18004	10.3151
A_09_P018156	euchromatic gene	8.68982	7.53929	9.11461	8.5864	8.62666	8.7483	8.83788	8.63831	8.67422	8.42246	8.73178	8.56533	8.63203	8.64919	8.81241	8.37043	8.60203	8.43244	8.75694	7.81217	8.92611
A_09_P018161	euchromatic gene	9.41884	8.26089	9.88111	8.96897	9.93769	9.93107	9.93845	9.69596	10.0972	9.62075	10.1078	9.36131	9.41658	9.34948	9.46303	9.39843	9.35591	9.43213	9.66908	8.73839	9.92607
A_09_P018166	euchromatic gene	9.54393	8.33486	9.7044	8.96641	9.50895	9.61804	10.0155	9.46045	9.58171	9.5956	9.6675	9.44483	9.55877	9.33293	9.47289	9.6595	9.3999	9.65699	9.68039	8.68113	9.79248
A_09_P018171	euchromatic gene	8.51561	7.30091	8.2872	7.83283	8.60954	8.46735	8.94845	8.34946	8.57194	8.47488	8.64311	8.2787	8.47102	8.4555	8.28565	8.33698	8.42599	8.35705	8.40802	7.47087	8.65072
A_09_P018176	euchromatic gene	9.20733	7.81214	9.4064	8.566	8.9368	8.96027	9.18442	9.16823	9.07588	8.82489	9.13931	8.9671	8.93171	8.85876	8.80419	8.7566	8.92089	8.81076	9.13857	7.96238	9.27599
A_09_P018181	euchromatic gene	9.30109	7.73964	8.67276	7.80763	9.23272	9.1417	9.16727	9.13552	9.40651	9.28752	9.39742	8.82647	8.9105	9.07305	9.07492	9.02966	8.78451	9.02704	8.98028	7.69354	9.2692
A_09_P018186	euchromatic gene	9.40193	7.92256	8.85956	8.0089	9.12157	9.19591	9.16508	9.20285	9.23512	9.16272	9.27305	8.82143	9.08244	9.17729	9.17247	9.07363	8.99532	8.98547	9.3318	7.90874	9.59234
A_09_P018191	euchromatic gene	11.7041	11.4474	12.4762	12.5476	13.0791	12.8674	12.3935	12.5621	12.772	12.4492	12.7748	11.7286	11.6323	11.8569	12.1601	12.3026	11.8153	12.4167	11.8621	11.9609	12.321
A_09_P018196	euchromatic gene	9.73238	8.0682	9.90069	8.60514	9.59337	9.3374	9.46804	9.8182	9.49703	9.5755	9.84331	8.77134	9.10308	9.36889	9.37809	9.48279	8.89201	9.19602	9.45794	7.87711	9.74369
A_09_P018201	euchromatic gene	9.30706	7.98951	9.27549	8.20052	9.14094	9.36402	9.48945	9.26765	9.3107	9.22721	9.50543	9.04411	9.07061	9.06526	9.0308	8.87397	9.02422	8.98433	9.25777	7.92755	9.40735
A_09_P018206	euchromatic gene	9.49108	7.91906	9.91101	8.68887	9.33553	9.40364	9.87399	9.67277	9.4425	9.51866	9.58898	9.24103	9.42418	9.2521	9.39618	9.4322	9.35442	9.36266	9.61489	8.3034	9.89822
A_09_P018211	euchromatic gene	8.97656	7.70373	8.94344	8.26199	9.0281	8.86872	9.63018	9.14073	9.00502	9.22496	9.00521	9.04424	9.09693	9.16246	9.21755	9.02921	9.00551	9.14804	9.3437	8.37604	9.57907
A_09_P018216	euchromatic gene	9.99845	8.28745	10.0972	8.81831	9.88797	9.97727	10.0444	9.87079	9.94715	9.92095	10.0896	10.1857	9.87279	9.75047	9.63004	9.77254	9.79719	9.77058	10.2985	8.62864	10.3223
A_09_P018221	euchromatic gene	8.45189	7.25678	8.5434	7.9248	8.64562	8.72442	8.79178	8.5679	8.63202	8.31944	8.65726	8.33001	8.37763	8.41287	8.2101	8.4497	8.35732	8.31312	8.58138	7.48971	8.75213
A_09_P018226	euchromatic gene	9.01058	7.91416	8.98908	8.56903	8.82635	8.79067	9.13887	8.82141	8.88527	8.70912	8.91482	8.7297	8.79866	8.81108	8.77616	8.71831	8.84021	8.64303	9.11644	7.96046	9.19103
A_09_P018231	euchromatic gene	10.8262	9.45805	10.9034	9.72105	11.0096	11.0553	11.1057	11.0124	10.8581	10.8754	11.1685	10.3853	10.354	10.6379	10.9848	10.6604	10.2631	10.7956	10.4866	9.74308	11.0814
A_09_P018236	euchromatic gene	9.18005	8.04962	9.23366	8.65353	9.19541	9.15758	9.60747	9.33502	9.04396	9.00843	9.0901	9.0702	9.07266	9.03887	9.07799	9.12634	8.98202	8.98147	9.04308	8.50729	9.46486
A_09_P018241	euchromatic gene	10.1615	8.3746	10.3866	9.09526	10.1519	10.2249	10.4319	10.2541	10.2842	10.2321	10.43	9.93331	9.94759	10.1365	10.3336	10.0401	9.79515	9.90972	10.2074	8.60261	10.5355
A_09_P018246	euchromatic gene	10.6034	8.73398	11.2427	10.0383	10.7944	10.6897	10.7432	10.7123	10.6738	10.5902	10.5723	10.3803	10.2176	10.3263	10.2991	10.4873	10.195	10.231	10.5441	9.17086	10.8129
A_09_P018251	euchromatic gene	9.17566	7.80775	9.2502	8.33227	9.26569	9.18004	9.52539	9.17054	9.14945	9.1502	9.26685	8.64222	8.72592	8.81704	8.81118	8.87766	8.61315	9.0067	8.88956	7.80238	9.16019
A_09_P018256	euchromatic gene	10.21	8.59544	10.3257	8.93664	9.93418	10.0028	10.415	10.1616	10.0036	10.1466	10.0849	9.87376	9.93223	9.96255	10.0758	10.0601	9.7906	9.91515	10.1057	9.05873	10.4851
A_09_P018261	euchromatic gene	10.3052	8.46729	10.2326	8.91455	10.336	10.1985	10.1639	10.078	10.3161	10.0486	10.4421	9.67807	9.69625	9.87028	9.92002	9.63243	9.59167	9.88642	9.94206	8.50681	10.1667
A_09_P018266	euchromatic gene	10.0522	8.38978	10.0047	8.89701	10.0684	10.3009	10.3287	10.029	10.179	9.94347	10.5998	10.0168	9.81022	10.0428	9.92697	9.57541	9.83725	9.59275	9.97478	8.54751	10.2529
A_09_P018271	euchromatic gene	10.1106	8.50488	10.4824	9.2416	10.2587	10.2464	10.5952	10.1729	10.3618	10.1861	10.3853	10.0473	10.1016	10.1456	10.2411	10.0762	9.9566	9.98925	10.2882	8.88422	10.7339
A_09_P018276	euchromatic gene	9.96589	8.12353	10.1826	8.93517	9.99091	10.0697	10.344	10.308	10.1504	10.2789	10.2085	9.56055	9.60402	9.85305	9.87279	9.93785	9.41256	10.0668	9.81665	8.40652	10.1179
A_09_P018281	euchromatic gene	9.86717	8.05923	10.0294	8.77492	9.90346	10.1136	9.86147	9.69874	9.94174	9.71265	10.0773	9.39201	9.42856	9.55379	9.59498	9.66902	9.43731	9.47419	9.87371	8.09808	9.84433
A_09_P018286	euchromatic gene	9.31366	7.7531	9.28756	8.44767	9.07546	9.00272	9.81005	9.42725	9.11515	9.39208	9.1532	9.08335	9.2844	9.09661	10.4723	8.97983	9.22977	9.07523	9.69424	8.14191	9.82873
A_09_P018291	euchromatic gene	10.0138	8.2736	10.1317	9.17009	9.83433	9.7906	10.3943	9.96303	9.93765	9.99188	9.98785	9.61554	9.69204	9.59299	9.6547	9.62244	9.56611	9.7017	9.78021	8.66106	10.0201
A_09_P018296	euchromatic gene	9.13763	7.62913	8.55604	7.959	8.87626	8.6749	8.45653	8.93678	8.79991	9.04591	7.91369	8.56443	8.14188	8.89068	8.65303	8.66053	8.56252	8.77871	8.7234	7.61492	8.85917
A_09_P018306	euchromatic gene	11.0965	10.4288	11.3265	11.5593	11.7747	12.1892	11.6178	11.7471	11.8765	11.9574	12.1948	11.0826	11.2505	11.8212	12.0489	12.2834	11.1583	12.0358	11.1386	10.9095	11.4629
A_09_P018311	euchromatic gene	8.92242	7.72855	9.19959	8.4815	9.0276	9.01744	9.43539	9.10523	8.95437	8.89906	9.03391	8.8059	9.02906	8.82602	10.1954	9.01363	8.83367	8.89741	9.34588	7.89568	9.54274
A_09_P018316	euchromatic gene	9.5146	8.1265	9.79425	8.80438	9.27005	9.25921	9.8272	9.63873	9.5153	9.44313	9.56107	9.34115	9.48029	9.39828	9.42094	9.18916	9.37461	9.17579	9.67657	8.27675	10.0216
A_09_P018326	euchromatic gene	9.31807	7.74872	8.53311	7.77375	9.11844	9.0215	9.38319	9.22223	9.02716	9.15157	9.22398	8.64002	8.81361	8.98765	8.98079	8.92954	8.7418	9.04921	8.90282	7.66953	9.22303
A_09_P018331	euchromatic gene	9.51087	7.98149	9.28211	8.53828	9.36049	9.3293	9.92375	9.63307	9.3824	9.6058	9.45803	9.42475	9.51775	9.42156	9.56252	9.48374	9.28906	9.46519	9.7075	8.89297	9.91695
A_09_P018336	euchromatic gene	8.5353	7.5739	9.01712	8.2581	8.76868	8.91545	8.95151	8.97589	8.71273	8.5278	8.89345	8.48325	8.54373	8.46457	8.49257	8.90001	8.39963	8.57222	8.58456	7.69663	8.88798
A_09_P018341	euchromatic gene	9.68446	8.10415	9.88727	8.9419	9.8	9.70601	10.0306	9.95767	9.84727	9.73208	9.87316	9.6005	9.58345	9.74396	9.93865	9.74281	9.41106	9.59347	9.66653	8.45143	9.98257
A_09_P018346	euchromatic gene	8.68006	7.38902	9.07884	8.33796	8.68394	8.83095	9.26269	9.00946	8.4889	8.81553	8.74291	8.48198	8.72015	8.40554	8.46673	8.60368	8.49864	8.851	8.82106	7.6558	9.1651
A_09_P018351	euchromatic gene	9.3657	8.66759	10.1009	9.71525	10.1043	9.94472	9.40242	9.75503	10.1317	9.68594	9.9355	8.8203	8.62641	9.46465	9.49753	9.58272	8.75242	9.71662	8.93	8.5428	9.57191
A_09_P018356	euchromatic gene	6.85313	6.50635	7.48119	7.14797	7.14974	7.27634	7.71605	7.5235	6.95746	7.11811	7.02417	7.28349	7.01909	7.21299	7.03043	7.44028	7.27186	7.40649	6.914	6.56053	7.61065
A_09_P018361	euchromatic gene	10.0543	8.4835	10.3086	9.14526	9.93423	10.249	10.1707	10.1083	10.2078	9.82955	10.4555	9.9442	9.84395	9.81863	9.68074	9.90989	9.5976	9.65353	10.0166	8.52645	10.1731
A_09_P018366	euchromatic gene	10.9848	9.94028	11.1744	9.73206	11.2327	11.3449	11.4371	11.0975	11.4543	11.412	11.5245	10.8175	10.6347	10.9442	10.9903	11.029	10.4509	10.987	10.9927	9.40704	11.3495
A_09_P018371	euchromatic gene	10.049	8.41507	9.94332	8.77657	9.88215	10.0807	10.1362	9.95507	10.0976	9.78168	10.1295	9.85994	9.76039	9.90436	9.72686	9.71077	9.63245	9.45793	10.0154	8.54283	10.1852
A_09_P018376	euchromatic gene	9.69785	8.09218	10.3936	9.10182	9.65499	9.78505	9.80013	9.57862	9.82043	9.58608	9.94647	9.6003	9.4831	9.48726	9.62461	9.34642	9.38522	9.40425	9.73061	8.24379	10.1684
A_09_P018381	euchromatic gene	9.30679	7.85264	9.70155	8.50162	9.10523	9.08102	9.37632	9.25297	9.19908	8.85386	9.38788	8.94175	9.10963	9.00002	8.85626	8.9277	9.13714	9.05283	9.1624	8.10077	9.57621
A_09_P018386	euchromatic gene	9.6691	8.01787	9.08134	8.3897	9.06916	9.09322	9.70232	9.23564	9.23439	9.47499	9.28305	9.1883	9.33656	9.27137	9.28271	9.15324	9.24908	9.31953	9.53147	8.24763	9.7331
A_09_P018391	euchromatic gene	11.267	9.76116	11.2551	10.2599	11.4825	11.6497	10.8856	11.4089	11.5538	11.4913	11.6987	10.2693	10.177	11.0642	11.1526	11.1419	10.0495	11.2463	10.4009	9.22357	10.918
A_09_P018401	euchromatic gene	9.57621	8.17603	9.531	8.79131	9.58167	9.67458	9.76019	9.5045	9.5726	9.58859	9.69225	9.15382	9.35305	9.28704	9.34933	9.49075	9.24185	9.29867	9.67213	8.25123	9.71771
A_09_P018406	euchromatic gene	9.59163	8.72914	9.7705	9.42144	10.0248	9.84769	9.64626	9.85288	10.113	9.91274	10.2995	9.41884	9.37921	9.58614	9.56107	9.60015	9.43299	9.71933	9.54789	9.0179	9.63311
A_09_P018411	euchromatic gene	9.04275	7.69357	9.51308	8.54108	9.18572	9.2438	9.41625	9.26525	9.31108	9.06303	9.41547	9.13017	9.12014	9.11752	8.88327	8.94542	9.03112	8.92995	9.42814	7.97521	9.43356
A_09_P018421	euchromatic gene	9.15796	7.89383	9.35451	8.50279	8.97548	9.08768	9.37194	9.06887	8.87124	9.09071	8.94242	8.94797	9.04591	8.7564	8.77321	8.91323	9.0255	9.00051	9.29639	8.14838	9.50008
A_09_P018431	euchromatic gene	9.67623	8.27882	9.6749	9.35243	9.64868	9.62284	9.77179	9.68152	9.71256	9.66465	9.8666	9.29708	9.41473	9.20358	9.35294	9.40188	9.33225	9.58351	9.61576	8.7831	9.79542
A_09_P018436	euchromatic gene	9.56206	8.01323	9.87167	8.81064	9.58879	9.77827	10.0491	9.52934	9.79024	9.63091	9.89429	9.47095	9.58532	9.42606	9.36586	9.46728	9.47943	9.34284	9.94961	8.25666	9.98746
A_09_P018441	euchromatic gene	9.09363	7.71311	9.71265	8.78739	9.08166	9.11426	9.36089	9.09018	9.33088	9.11913	9.26953	9.01565	9.16718	8.9244	8.90471	8.94373	9.0904	8.74729	9.41185	8.21995	9.55776
A_09_P018446	euchromatic gene	9.45355	7.86763	9.43666	8.54153	9.47695	9.43116	9.75719	9.63123	9.40582	9.50466	9.50111	9.28482	9.42938	9.30677	9.36153	9.15714	9.32355	9.21404	9.61195	8.37569	9.88785
A_09_P018451	euchromatic gene	10.2342	8.70254	9.57358	8.92139	9.8079	9.85432	9.68358	9.99609	9.98443	10.1529	10.0194	9.4299	9.50107	9.86835	9.75644	9.71595	9.39282	9.89915	9.75064	8.54848	10.0785
A_09_P018456	euchromatic gene	10.0359	8.4766	10.7105	9.82301	9.82701	9.56166	9.96189	9.8446	9.58585	9.7532	9.59838	9.54574	9.53744	9.54734	9.61125	9.5774	9.50039	9.44606	10.0431	9.00176	10.2535
A_09_P018461	euchromatic gene	8.85752	7.68054	9.37586	8.49435	9.26766	9.22365	9.26539	8.89651	9.30268	9.02403	9.40483	8.74416	9.01835	8.79027	8.88455	8.74756	8.72313	8.83829	9.18526	7.8774	9.16872
A_09_P018466	euchromatic gene	9.24056	7.78924	9.4798	8.39311	9.32877	9.183	9.48129	9.21035	9.25658	9.12865	9.36805	8.97624	9.08179	8.8873	8.92718	8.89568	9.03829	8.92693	9.42988	8.04181	9.63611
A_09_P018471	euchromatic gene	9.60789	7.90532	9.98114	8.94385	9.61664	9.47493	10.0003	9.69964	9.63929	9.65804	9.6065	9.37698	9.47124	9.32595	9.34624	9.24619	9.35159	9.42885	9.70983	8.36613	9.96015
A_09_P018476	euchromatic gene	9.1875	7.7114	9.65756	8.57957	8.90891	8.90921	9.58859	9.43623	9.14608	9.22579	9.18526	9.04567	9.12587	9.03517	8.97787	9.07485	9.06279	9.04984	9.35225	7.98956	9.5365
A_09_P018481	euchromatic gene	9.12122	7.80744	9.63168	8.53087	9.46201	9.52816	9.4884	9.39398	9.38619	9.2949	9.62638	8.97365	9.09321	9.0699	9.01596	9.07211	9.05045	9.05745	9.39117	8.14431	9.7343
A_09_P018486	euchromatic gene	8.99556	7.90124	9.66635	8.69577	9.03267	9.11218	9.4542	9.06007	9.0569	8.90344	9.18863	8.99881	9.16756	9.08667	8.88618	8.77454	8.98018	8.88384	9.31344	8.2043	9.41514
A_09_P018491	euchromatic gene	10.2798	8.33637	10.1637	8.93019	10.1043	10.1281	10.6031	10.1184	10.2198	10.2614	10.3407	10.0181	10.0501	10.0579	9.99322	9.82322	9.91678	9.90154	10.188	8.62673	10.5402
A_09_P018496	euchromatic gene	9.75137	8.10861	9.87441	9.38262	9.74718	9.6079	9.84094	9.62461	9.64338	9.72538	9.73526	9.18129	9.30684	9.70124	9.60807	9.41942	9.14182	9.44338	9.30417	8.5396	9.68785
A_09_P018501	euchromatic gene	8.4549	7.52619	9.26125	8.32968	8.64259	8.8449	8.79564	8.89471	8.76828	8.47283	8.9134	8.28407	8.58102	8.6804	8.54991	8.28447	8.51506	8.47279	8.60506	7.66083	8.92743
A_09_P018506	euchromatic gene	10.06	8.33337	10.6141	9.03015	10.2177	10.1319	10.2625	10.096	10.2179	10.0279	10.2592	9.56775	9.78501	9.81572	9.93188	9.78429	9.64771	9.76008	9.95519	8.55917	10.3976
A_09_P018511	euchromatic gene	9.88672	8.63591	10.1383	9.34702	10.1576	9.99716	10.1219	9.90964	10.0777	10.0575	10.3928	9.8295	9.96604	9.71625	10.0032	9.78391	9.76671	9.80534	10.0465	9.04114	10.3623
A_09_P018516	euchromatic gene	8.5815	7.48227	8.53683	7.89635	8.68363	8.76391	9.23393	9.01613	8.83928	8.92106	8.84766	8.50784	8.65591	8.76532	8.74824	8.83229	8.58738	8.82468	8.69508	7.70458	9.01501
A_09_P018521	euchromatic gene	9.80186	8.3087	10.0465	9.04259	9.80119	9.96936	9.5651	9.65816	10.0205	9.43465	10.1445	9.25654	9.16198	9.55707	9.36909	9.36115	9.2402	9.26256	9.66385	8.14936	9.86911
A_09_P018526	euchromatic gene	10.1534	8.70811	10.6076	9.35335	10.4376	10.1651	10.053	10.1804	10.2611	9.91437	10.4419	9.56384	9.54614	9.63813	9.70903	9.54606	9.42215	9.66946	9.7307	8.73452	10.1929
A_09_P018531	euchromatic gene	9.14233	8.18706	9.36198	9.01307	9.49221	9.6027	9.68137	9.46538	9.49341	9.31596	9.80574	8.64076	8.73907	9.19463	9.00484	9.28527	8.88466	9.12283	8.95489	8.02197	9.50441
A_09_P018536	euchromatic gene	10.2441	8.59068	10.0932	9.40361	10.3135	10.1042	10.4483	10.2059	10.2046	10.367	10.3053	9.78207	10.0308	9.98674	10.1084	9.95446	9.81405	9.98251	10.0258	9.17133	10.4494
A_09_P018541	euchromatic gene	9.6358	8.05119	9.76534	8.77337	9.5466	9.72352	10.2376	9.69211	9.6752	9.62698	9.34443	9.55054	9.61302	9.62814	9.52432	9.66713	9.57912	9.46903	9.89104	8.40153	10.1423
A_09_P018546	euchromatic gene	9.64731	7.97509	9.51554	8.40556	9.61423	9.35397	9.57125	9.44725	9.50492	9.27542	9.774	9.08556	9.22472	9.19507	9.26586	8.85408	9.16936	9.07778	9.52339	8.15903	9.58315
A_09_P018551	euchromatic gene	9.51654	8.39427	9.89216	8.99419	9.43415	9.46713	9.76878	9.43356	9.47978	9.444	9.69051	9.39527	9.58925	9.26344	9.45242	9.25297	9.35082	9.30459	9.62227	8.82779	9.9546
A_09_P018556	euchromatic gene	9.06318	7.63599	9.13163	8.30745	8.97563	9.2041	9.51251	9.10805	8.96862	8.99609	9.1563	9.05166	9.14471	8.74664	8.80734	9.19771	9.08525	8.97889	9.36109	8.12474	9.49853
A_09_P018561	euchromatic gene	9.05558	7.7983	10.115	9.04164	9.04581	9.20229	9.28594	8.90503	9.15036	8.98143	9.35941	8.88866	9.00109	8.78553	8.88307	8.77463	9.11241	8.94708	9.20266	7.90259	9.34145
A_09_P018571	euchromatic gene	9.13116	7.77823	9.57511	8.65385	9.23976	9.0775	9.60746	9.2199	9.12218	9.14895	9.18808	9.14337	9.23138	9.16228	9.25031	9.15712	9.14997	9.07915	9.54723	8.13548	9.79302
A_09_P018576	euchromatic gene	10.876	9.53749	10.2281	9.63985	10.7294	10.8477	10.2666	10.6162	10.8996	10.6801	11.0445	9.70542	9.62619	10.5898	10.5372	10.3501	9.5527	10.4339	9.8293	9.07049	10.2696
A_09_P018581	euchromatic gene	9.93648	8.04096	9.59485	8.52334	9.56516	9.57681	10.1712	9.69997	9.73298	9.89794	9.82644	9.7582	9.74758	9.78724	9.6742	9.43815	9.64111	9.56254	9.93769	8.43656	10.2085
A_09_P018586	euchromatic gene	10.7105	9.71826	10.4837	10.1124	10.4338	10.3948	10.833	10.7283	10.3878	10.9626	10.5234	10.3511	10.3532	10.456	10.4743	10.3853	10.3211	10.4862	10.5732	10.0116	11.0163
A_09_P018591	euchromatic gene	10.1265	8.31176	10.8317	9.32742	10.4517	10.5978	10.5661	10.3874	10.6383	10.049	10.842	10.1514	10.0403	10.2222	10.1037	9.91492	9.98164	9.87278	10.314	8.76042	10.649
A_09_P018596	euchromatic gene	8.65459	7.59838	8.79257	8.0373	8.75248	9.18829	9.10122	8.76337	8.95258	8.4218	9.25485	8.53108	8.56937	8.55322	8.48105	8.46874	8.65546	8.50955	8.80735	7.71853	9.03973
A_09_P018601	euchromatic gene	9.43004	8.21435	9.42834	8.40675	9.61857	9.56477	9.71393	9.37764	9.50287	9.53628	9.81687	9.0438	9.40875	9.2769	9.38424	9.2874	9.01358	9.27066	9.51402	8.24981	9.60508
A_09_P018606	euchromatic gene	9.79233	8.48668	10.0159	8.92718	10.0553	10.3178	10.4384	9.94256	10.2946	9.94729	10.3612	9.63876	9.69805	9.8576	9.66797	9.71535	9.70162	9.72423	9.8867	8.71838	10.3729
A_09_P018611	euchromatic gene	9.27091	8.2261	9.44187	8.61447	9.44282	9.27469	9.56331	9.22094	9.35087	9.24951	9.51309	9.10322	9.17094	9.07809	9.24795	8.94302	9.08338	9.12634	9.38103	8.25281	9.60565
A_09_P018616	euchromatic gene	9.02662	7.62176	8.85323	8.13035	8.95055	8.82868	9.4276	8.97962	9.06086	9.05142	9.07337	8.82545	8.98346	8.96566	9.00384	8.6919	8.92765	8.91369	9.19485	7.95132	9.39773
A_09_P018621	euchromatic gene	9.36784	7.89363	9.86136	8.51118	9.1678	9.41871	8.44262	9.84323	9.1943	9.62044	9.70839	9.41264	9.33559	9.41132	9.62003	8.56745	9.13916	9.62295	9.67222	8.21078	9.53645
A_09_P018626	euchromatic gene	10.0722	8.6658	9.98867	9.47686	10.0426	10.0878	10.3291	9.97577	10.2396	9.9706	10.2315	9.95429	9.96857	9.85579	9.91136	9.84032	9.86249	9.70918	10.0806	9.02726	10.3706
A_09_P018631	euchromatic gene	8.98102	7.73086	9.527	8.40599	9.09575	8.97485	9.14589	9.05675	9.1217	8.90322	9.18487	8.75352	8.84447	8.73811	8.84583	8.53752	8.78158	8.86904	8.99044	7.94562	9.13202
A_09_P018636	euchromatic gene	8.4808	7.33673	8.69106	8.15004	8.52738	8.42671	8.91677	8.56064	8.44084	8.51817	8.38987	8.3842	8.56304	8.44991	8.67507	8.51526	8.45084	8.44075	8.72509	7.60022	8.92772
A_09_P018641	euchromatic gene	8.87474	7.76812	8.99996	8.37941	8.7436	8.96513	9.14298	9.03689	8.85892	8.66368	9.0631	8.64584	8.74805	8.78413	8.53655	8.83428	8.61525	8.66437	9.12417	8.05103	9.19251
A_09_P018646	euchromatic gene	10.061	8.25626	10.4407	8.97176	10.185	10.3886	10.3437	10.1068	10.3941	10.1132	10.5791	10.0878	9.99397	9.95244	10.0343	9.63151	9.83977	9.89144	10.1617	8.65517	10.434
A_09_P018651	euchromatic gene	9.65033	7.97991	9.38014	8.56341	9.34808	9.24512	9.92562	9.70509	9.38138	9.5745	9.4499	9.36583	9.51512	9.42436	9.38872	9.43206	9.40714	9.39322	9.7919	8.54593	9.99518
A_09_P018656	euchromatic gene	9.2696	8.21085	9.85906	9.33341	9.76014	9.81591	9.77584	9.62151	9.74024	9.62779	9.95455	9.12837	9.24274	9.29176	9.20842	9.45978	9.37457	9.36428	9.70888	8.46391	9.61998
A_09_P018661	euchromatic gene	9.1384	7.68382	9.19037	8.18388	9.187	9.20257	9.29381	9.20838	9.34025	8.95793	9.59088	8.71051	8.9505	9.18021	9.13149	8.71962	8.68072	9.11795	8.92877	7.74234	9.17914
A_09_P018666	euchromatic gene	9.83882	8.07242	9.31724	8.39461	9.84788	9.71682	9.82695	9.89115	9.82517	9.72378	9.96541	9.32974	9.41264	9.65461	9.69263	9.65591	9.37503	9.6852	9.51862	8.47412	9.94987
A_09_P018671	euchromatic gene	9.61239	8.28069	10.6317	9.4678	10.3816	10.8971	10.1557	9.98494	10.9702	10.0607	11.2037	9.59092	9.69865	10.031	10.0633	10.0256	9.45736	10.0107	9.71171	8.57416	10.2464
A_09_P018676	euchromatic gene	9.45284	7.89844	9.55765	8.59686	9.59103	9.65431	9.88774	9.62025	9.66881	9.51002	9.62553	9.2858	9.36832	9.32434	9.28971	9.01579	9.219	9.16533	9.62324	8.23588	9.82955
A_09_P018681	euchromatic gene	9.58268	8.38585	10.0424	8.95122	9.58925	9.67167	10.0284	9.67173	9.62889	9.64604	9.84299	9.40619	9.46626	9.47586	9.40138	9.47248	9.42561	9.52995	9.89378	8.39118	10.0204
A_09_P018686	euchromatic gene	8.53303	7.49992	8.94003	8.3044	8.74932	8.25239	9.3969	8.98083	8.43594	8.98388	8.99409	8.86956	8.96892	9.01526	9.10237	8.81565	8.62175	8.92371	9.05196	8.03782	9.16232
A_09_P018691	euchromatic gene	9.63423	7.96498	9.66858	8.48883	9.46909	9.67749	9.96094	9.56601	9.63637	9.47502	9.82218	9.67535	9.44467	9.45453	9.37709	9.12322	9.34873	9.22276	9.82705	8.39069	10.1233
A_09_P018696	euchromatic gene	10.1103	8.39362	9.54521	8.55069	10.0985	10.0651	9.94074	10.0443	10.1057	10.2578	10.232	9.56992	9.3954	10.0969	9.96537	9.6255	9.53159	9.87156	9.90587	8.5458	10.0928
A_09_P018701	euchromatic gene	10.1393	8.32061	10.2743	8.90517	10.2236	10.3076	10.11	10.0813	10.3847	10.0307	10.5067	9.74032	9.65769	9.91625	9.77716	9.75904	9.78622	9.76018	10.0819	8.44209	10.2937
A_09_P018706	euchromatic gene	9.32162	7.70565	9.64246	8.672	9.42812	9.40444	9.51993	9.21812	9.39824	9.24087	9.53299	8.95362	9.12888	9.01593	9.02062	9.12619	9.16807	9.01372	9.53107	7.99579	9.6305
A_09_P018711	euchromatic gene	9.79024	7.98288	9.93539	8.74682	9.67349	9.59205	9.9168	9.77963	9.69214	9.73443	9.77856	9.26155	9.50476	9.41912	9.6008	9.37173	9.30549	9.56736	9.52851	8.23471	9.86844
A_09_P018716	euchromatic gene	8.20394	7.19338	8.45377	7.91518	8.39684	8.60126	8.92325	8.45391	8.29584	8.3132	8.42702	8.25956	8.45237	8.3823	8.15857	8.50164	8.43514	8.31244	8.5822	7.57213	8.93145
A_09_P018721	euchromatic gene	9.76479	8.26237	10.1541	8.98881	9.86494	9.63965	9.78202	9.70568	9.71325	9.5677	9.8691	9.34734	9.39288	9.43542	9.55886	9.24507	9.42499	9.32982	9.77459	8.60304	10.0002
A_09_P018726	euchromatic gene	9.15378	7.64442	9.29661	8.24017	9.13114	9.14311	9.44877	8.97053	9.20617	8.93573	9.34357	8.93365	8.96825	8.88225	8.82509	8.64502	8.91573	8.7684	9.18674	7.93624	9.45012
A_09_P018731	euchromatic gene	9.92483	8.32555	9.94115	9.0315	9.93201	10.0421	10.169	9.79783	10.1139	9.62094	10.2748	9.78884	9.727	9.81802	9.69495	9.44831	9.72325	9.50058	10.0684	8.59863	10.2194
A_09_P018736	euchromatic gene	8.71703	7.41593	8.34684	7.81623	8.61436	8.55656	8.64103	8.99992	8.54463	8.92271	8.54427	8.09586	8.21816	8.53128	8.50066	8.48987	8.26803	8.60267	8.49369	7.32763	8.68827
A_09_P018741	euchromatic gene	10.385	8.59791	10.5464	9.48733	10.1692	10.0908	10.7597	10.3073	10.2104	10.3386	10.265	9.79492	9.89817	9.90538	10.0411	10.2047	10.1785	9.76561	10.5165	9.11047	10.8696
A_09_P018746	euchromatic gene	8.60095	7.52463	9.17146	8.44555	8.75357	8.79549	8.94914	8.70072	8.68331	8.43875	8.83234	8.39215	8.61638	8.52226	8.47459	8.43393	8.70002	8.49794	8.85983	7.79462	9.06196
A_09_P018751	euchromatic gene	9.81563	8.20866	9.73398	8.66705	9.86659	10.0614	10.1605	9.8073	10.0373	9.93197	10.1799	9.41297	9.59428	9.62699	9.69211	9.75601	9.41851	9.65639	9.76595	8.44338	10.0051
A_09_P018756	euchromatic gene	10.4729	8.83489	10.3661	9.244	10.4529	10.4475	10.7116	10.3396	10.5709	10.5377	10.7153	10.1549	10.2111	10.3896	10.3681	10.0881	10.0376	10.1731	10.5498	9.1511	10.7445
A_09_P018761	euchromatic gene	9.92423	8.58799	10.449	9.52799	10.3013	9.83962	10.0021	10.0339	10.0729	9.8709	10.1482	9.63809	9.72236	9.72577	9.86306	9.6026	9.59987	9.72211	10.0102	9.01634	10.0239
A_09_P018766	euchromatic gene	11.0383	10.6155	10.1396	9.90516	10.2394	9.993	10.7523	10.073	10.0323	10.1682	9.84735	10.4117	10.319	10.1442	9.94821	9.99123	10.4723	9.98602	10.5126	10.3967	11.1398
A_09_P018771	euchromatic gene	8.78728	7.58131	9.24446	8.80775	8.79873	8.66886	9.10068	8.67294	8.81624	8.74214	8.78463	8.60774	8.79027	8.57198	8.56434	8.49644	8.75218	8.58514	8.90338	7.98493	9.09533
A_09_P018776	euchromatic gene	9.28348	7.8441	9.25597	8.20905	9.38977	9.48449	9.01473	9.28297	9.54111	9.13852	9.82151	8.51655	8.77777	9.06324	8.91686	9.01212	8.85504	8.92828	9.12265	7.70499	9.18609
A_09_P018781	euchromatic gene	9.36484	7.86337	9.00343	8.20604	9.19748	8.91454	9.46059	9.31169	9.08457	9.20456	9.16509	8.94373	9.12548	8.91314	9.08742	8.69837	8.98193	8.80836	9.28641	8.34471	9.44408
A_09_P018786	euchromatic gene	9.71541	8.46214	9.01983	8.5845	9.30095	9.27778	9.46607	9.54374	9.32931	9.49075	9.39866	9.00197	9.05055	9.36737	9.34319	9.23014	8.97814	9.28351	9.24036	8.36923	9.41891
A_09_P018791	euchromatic gene	8.7341	8.58493	9.19268	8.29897	8.68231	8.80176	9.83654	9.47002	8.8042	9.2587	9.39913	9.07618	8.95799	7.97074	7.89373	8.08928	8.17812	8.67374	8.84074	8.66441	9.25624
A_09_P018796	euchromatic gene	8.99743	7.75252	8.8364	8.20234	8.86495	8.93213	9.38964	9.05257	8.97916	9.03987	9.06323	8.87211	8.8965	8.90737	8.65981	8.72429	8.88907	8.87924	9.05537	7.91607	9.28909
A_09_P018801	euchromatic gene	9.01549	7.78693	9.7684	9.58336	9.46037	10.0464	9.38003	9.89046	9.95613	9.67177	10.2464	9.09594	9.12772	9.23502	9.23987	9.82653	9.25143	9.67985	9.29327	8.6204	9.39639
A_09_P018806	euchromatic gene	9.36105	7.90506	9.30119	8.4586	9.08866	9.02312	9.75197	9.4193	9.16922	9.44045	9.25753	9.23842	9.3414	9.33817	9.44633	9.1818	9.23641	9.32133	9.55839	8.24411	9.79087
A_09_P018811	euchromatic gene	8.87291	7.77915	8.53765	8.08646	8.6133	8.47735	9.26179	8.6731	8.60286	8.85731	8.68297	8.79062	9.00344	8.8425	8.73485	8.57292	8.88645	8.65515	8.98548	8.19383	9.35813
A_09_P018816	euchromatic gene	8.91049	7.80262	9.29228	8.58206	7.99511	8.81656	9.18568	8.84876	8.92819	8.76022	9.09134	8.68995	8.75024	8.53768	8.40228	8.70356	8.86041	8.7236	9.03675	7.846	8.99369
A_09_P018821	euchromatic gene	10.6181	8.9495	10.8685	9.58191	10.6442	10.5909	10.9862	10.8533	10.7224	10.5568	10.9074	10.4872	10.5282	10.5931	10.8082	10.4972	10.3656	10.4376	10.7711	9.61728	11.1001
A_09_P018826	euchromatic gene	11.2031	10.2847	10.8342	11.0691	11.064	11.277	11.0037	10.8523	11.1533	11.0884	11.1965	10.5406	10.6078	10.9779	11.0011	11.3501	10.7215	10.9888	10.7957	10.4103	11.3385
A_09_P018831	euchromatic gene	10.6883	8.71051	10.3063	9.17931	10.6426	10.7069	10.2082	10.0467	10.8617	10.2672	10.7022	9.72142	9.76552	10.3637	10.4341	10.4886	10.0811	9.95562	10.1816	8.84267	10.5016
A_09_P018836	euchromatic gene	9.71767	8.25988	9.38162	8.70944	9.20683	9.18824	9.59316	9.56843	9.38215	9.38364	9.44295	9.27145	9.4131	9.3186	9.34775	9.03654	9.31559	9.09361	9.77938	8.49535	9.80735
A_09_P018841	euchromatic gene	8.92513	7.56841	9.37464	8.32309	9.06228	8.85019	9.35145	8.93389	9.04122	8.91393	9.09366	8.77952	8.95452	8.90182	8.8325	8.72929	8.87907	8.76777	9.16212	7.91548	9.40628
A_09_P018846	euchromatic gene	8.93231	7.46765	8.48178	7.96143	8.49185	8.51448	9.09808	8.59707	8.56772	8.51782	8.7331	8.61763	8.77062	8.66377	8.4941	8.54529	8.63011	8.58018	8.89164	7.80307	8.85327
A_09_P018851	euchromatic gene	9.86061	8.07816	9.54519	8.6196	9.76282	9.50801	9.79431	9.73984	9.74977	9.67121	9.86351	9.51954	9.49643	9.50428	9.70271	9.40201	9.48659	9.38966	9.77671	8.47314	9.95088
A_09_P018856	euchromatic gene	9.41641	7.799	9.06806	8.26485	9.29114	9.15459	9.62618	9.53392	9.39372	9.48293	9.39828	9.03369	9.15388	9.18381	9.27988	9.22254	8.93565	9.25227	9.2642	7.89195	9.6094
A_09_P018861	euchromatic gene	10.2883	8.4576	9.96511	9.02493	9.96908	10.029	10.4724	10.0759	10.1634	10.1819	10.2557	9.94273	10.0667	10.05	9.93627	9.82922	9.93818	9.97269	10.171	9.02958	10.4427
A_09_P018866	euchromatic gene	9.93286	8.19455	9.55607	8.52293	9.68601	9.67543	10.2853	9.59979	9.82528	9.75823	9.85009	9.48596	9.67469	9.67876	9.5034	9.5693	9.35288	9.43953	9.80751	8.69644	9.94779
A_09_P018871	euchromatic gene	10.3324	8.52373	10.4083	8.98475	10.3448	10.643	10.0868	10.409	10.4008	10.4474	10.5714	9.59207	9.71433	10.1556	10.3102	10.2878	9.63414	10.2192	9.94355	8.45097	10.2831
A_09_P018876	euchromatic gene	9.60785	8.28641	9.38255	8.57721	9.39338	9.3525	9.99554	9.54691	9.50281	9.6902	9.55215	9.43559	9.59972	9.55595	9.6854	9.45874	9.44984	9.53501	9.76515	8.38323	10.0574
A_09_P018881	euchromatic gene	9.46033	7.89477	9.57595	8.55824	9.56434	9.85184	9.86584	9.37465	9.7295	9.53843	9.79383	9.1725	9.26664	9.30022	9.39604	9.41125	9.17955	9.33426	9.4462	8.06546	9.70925
A_09_P018891	euchromatic gene	8.89347	7.8173	9.69161	8.87984	9.18947	9.15545	9.26696	8.82443	9.12383	9.0062	9.38441	8.78405	9.04284	8.75897	8.83398	8.8585	8.93818	8.88129	9.18619	8.09634	9.39119
A_09_P018896	euchromatic gene	9.33299	8.07027	9.9618	9.37139	9.14977	9.33161	9.88259	9.25972	9.40672	9.05747	9.68054	9.31146	9.20072	9.03424	9.16978	9.30552	9.0892	9.28986	9.63494	8.86798	9.86454
A_09_P018901	euchromatic gene	8.73605	7.41093	8.82138	8.13145	8.66367	8.5348	9.02806	8.77678	8.61465	8.64256	8.59045	8.59119	8.61332	8.69608	8.66257	8.40614	8.63976	8.54496	8.97907	7.68508	9.1277
A_09_P018906	euchromatic gene	7.52764	6.75577	8.48119	7.59671	7.38346	7.58079	7.91389	7.20273	8.30304	7.92711	8.35084	7.36254	7.67322	7.54054	7.39734	8.0097	8.18287	7.49831	8.32213	7.03975	7.76891
A_09_P018911	euchromatic gene	8.11572	7.09709	8.16328	7.9047	7.87479	7.91667	8.39203	7.81378	7.96857	7.78368	7.95473	7.95114	8.07792	8.11642	8.11544	7.84987	8.10084	7.96247	8.2034	7.32701	8.22051
A_09_P018916	euchromatic gene	8.9565	7.63681	9.0134	8.36688	9.07433	9.12299	9.34639	9.45868	9.10493	9.27481	9.22614	8.74131	8.86911	9.21073	9.34359	8.83471	8.76794	8.91742	9.00562	7.84289	9.27596
A_09_P018921	euchromatic gene	9.1737	7.81767	9.46324	8.50125	9.36258	9.68701	9.47027	9.40949	9.67554	9.16807	9.88514	9.18743	9.08528	9.35444	9.14588	9.07433	9.09867	9.07428	9.34133	7.90335	9.52383
A_09_P018926	euchromatic gene	9.19204	7.94851	9.54583	8.66362	9.08177	9.2047	9.28633	8.98624	9.11145	8.93549	9.16299	8.91616	9.0637	9.03324	8.9072	8.95133	8.85445	8.9379	9.40025	8.12881	9.58072
A_09_P018931	euchromatic gene	11.7598	11.0281	11.7921	11.6006	11.8812	11.8679	11.4653	11.8568	11.6076	11.4695	11.5829	10.8382	10.8738	11.658	11.8298	11.6924	10.8254	11.7207	10.9751	10.8601	11.6067
A_09_P018936	euchromatic gene	10.3228	8.45619	10.6282	9.17344	10.1461	10.2859	10.4886	10.3444	10.3005	10.3596	10.3808	9.92366	10.029	9.9373	10.137	10.1805	9.83316	10.0526	10.216	8.77255	10.4019
A_09_P018941	euchromatic gene	9.22558	8.00303	9.1801	8.50802	9.08034	9.08304	9.61384	9.06907	9.0479	9.24728	8.98047	9.09084	9.18261	9.146	9.06165	9.04753	9.12045	9.05151	9.42596	8.16565	9.69144
A_09_P018946	euchromatic gene	8.45936	7.47415	8.934	8.37935	8.69099	8.77488	9.13191	8.63542	8.72261	8.84306	8.8299	8.68272	8.69208	8.71682	8.36305	8.52514	8.66923	8.44672	8.68436	7.92636	8.77976
A_09_P018951	euchromatic gene	10.7112	9.65567	9.80544	8.91386	9.93774	9.88244	11.4834	10.6202	9.88726	10.5342	9.90942	10.5344	10.4869	10.337	10.1407	9.94708	10.3144	10.0394	10.6691	10.2852	11.2186
A_09_P018956	euchromatic gene	9.06594	8.05223	9.24804	8.53239	9.13103	9.07028	8.97853	9.0191	8.9958	8.83493	9.02236	8.76879	8.85765	8.47039	8.39505	8.81631	8.91679	8.86426	9.1458	8.2701	9.21456
A_09_P018961	euchromatic gene	9.77948	8.35986	10.0546	9.41059	9.52637	9.44725	10.0076	9.73179	9.55716	9.94756	9.49665	9.69158	9.73863	9.57275	9.58866	9.65979	9.52801	9.7639	9.93084	8.84982	10.1471
A_09_P018966	euchromatic gene	8.8161	7.69117	9.25379	8.68059	9.2728	9.50432	9.06454	9.16619	9.14118	8.97357	9.24944	8.22509	8.39681	8.90663	8.75971	9.06906	8.37824	8.90835	8.40135	7.47721	8.79347
A_09_P018971	euchromatic gene	9.11571	7.73812	9.24587	8.26648	9.26737	9.32086	9.17395	8.86658	9.47627	9.02576	9.50278	8.85858	9.1307	9.06518	9.169	8.88164	8.8064	8.99203	9.0933	8.00451	9.47384
A_09_P018976	euchromatic gene	9.11924	7.81572	9.56423	8.72772	9.23709	9.28833	9.46308	9.09457	9.36708	9.16904	9.4025	8.88618	9.04442	9.0715	8.73314	8.9177	8.98723	8.95253	9.22076	8.02312	9.41677
A_09_P018981	euchromatic gene	10.3934	8.7072	10.4111	9.17849	10.5062	10.4768	10.665	10.4277	10.5589	10.2857	10.7547	10.0879	10.1306	10.2162	10.2003	10.0009	10.0271	10.1768	10.3636	9.09756	10.6304
A_09_P018986	euchromatic gene	9.00707	7.60536	9.05508	8.39137	8.96023	8.91737	9.51999	8.99436	8.96583	9.07822	9.06248	8.75738	8.85687	8.83438	8.6411	9.03686	8.92947	8.94364	9.29631	7.99142	9.44446
A_09_P018991	euchromatic gene	9.39907	8.363	9.58869	8.32976	9.64942	9.65609	9.58093	9.44944	9.80163	9.49087	9.89286	8.8546	8.97593	8.91069	8.74758	9.16969	9.23545	9.27132	9.65603	7.87162	9.59442
A_09_P018996	euchromatic gene	9.52638	8.13804	9.66025	8.38876	9.95748	9.62694	9.77038	9.62782	9.59491	9.65652	10.0093	9.16676	9.54462	9.42864	9.4768	9.52645	9.1345	9.48708	9.68036	8.1498	9.70003
A_09_P019001	euchromatic gene	9.15785	7.6926	9.78249	8.78453	9.29619	8.9974	9.26365	8.79465	9.16743	8.84772	9.24244	8.60169	8.96245	8.47037	8.516	8.64508	8.97044	8.70841	9.2241	8.0789	9.37481
A_09_P019006	euchromatic gene	10.436	8.97553	10.2567	9.16731	10.4811	10.6832	9.77099	10.4012	10.7365	10.2195	10.9372	9.29052	9.14668	10.2802	9.96509	9.9115	9.11493	9.90133	9.48051	8.09586	9.80231
A_09_P019011	euchromatic gene	9.34782	8.04797	9.26216	8.49809	9.54607	9.62108	9.95238	9.52407	9.69147	9.57376	9.87855	9.26615	9.36359	9.39113	9.21759	9.36921	9.35901	9.35357	9.41999	8.3719	9.62762
A_09_P019016	euchromatic gene	9.62886	7.89087	9.93863	8.7983	9.79287	9.56525	9.6702	9.39654	9.67171	9.42015	9.69089	9.34673	9.37031	9.44888	9.48927	9.43467	9.139	9.40971	9.72853	8.18833	9.82853
A_09_P019021	euchromatic gene	9.58726	8.11763	9.74704	8.7566	9.57791	9.67383	9.43448	9.52088	9.73893	9.51917	9.8547	9.19814	9.18064	9.41283	9.30484	9.30885	9.02895	9.42701	9.43176	8.00416	9.59164
A_09_P019026	euchromatic gene	10.6618	8.83479	10.473	9.35931	10.4013	10.2982	10.8766	10.4906	10.4578	10.5959	10.5339	10.3179	10.367	10.4156	10.3042	10.1122	10.1895	10.2187	10.5838	9.27159	10.8772
A_09_P019031	euchromatic gene	9.12175	8.02416	9.57326	9.0274	9.42841	9.25021	9.85216	9.38033	9.30348	9.3163	9.32737	9.0412	9.14182	9.13976	9.04387	9.18612	9.09094	9.16305	9.31622	8.39683	9.4647
A_09_P019036	euchromatic gene	10.0706	8.11934	10.18	9.01624	9.85738	9.79278	10.4062	9.91118	9.95405	9.73873	10.2678	9.77868	9.86147	9.89697	9.71491	9.63902	9.69209	9.59371	9.90504	8.48288	10.1207
A_09_P019041	euchromatic gene	8.70858	7.74166	8.35949	7.94969	8.15284	8.207	8.80612	8.47892	8.1989	8.22757	8.23743	8.60398	8.67908	8.51788	8.39232	8.20687	8.49523	8.35673	8.67033	7.79191	8.80021
A_09_P019051	euchromatic gene	9.42817	8.09083	9.91819	9.17426	9.55196	9.68197	9.77925	9.54203	9.5442	9.38086	9.89104	9.23865	9.25513	9.39251	9.40249	9.53289	9.35458	9.35581	9.5542	8.3306	9.74439
A_09_P019056	euchromatic gene	9.95589	8.34921	9.74522	8.83677	9.71703	9.65073	10.0224	9.74808	9.74204	9.92207	9.9445	9.39449	9.6114	9.74176	9.76221	9.63571	9.32095	9.66671	9.68827	8.32861	9.96719
A_09_P019061	euchromatic gene	9.66522	8.02786	9.90331	8.69344	9.65487	9.79759	10.1513	9.85654	9.8375	9.74674	9.9575	9.54347	9.58743	9.65735	9.65298	9.46733	9.52137	9.52708	9.83195	8.41789	10.1026
A_09_P019066	euchromatic gene	10.0261	8.2152	9.9345	8.89037	9.78726	9.77058	10.3701	10.0108	9.91424	10.1416	9.96192	9.77924	9.89537	9.93861	10.0732	9.99427	9.67074	9.90989	10.1892	8.62754	10.4259
A_09_P019071	euchromatic gene	9.44825	8.13896	9.76695	8.8221	9.52857	9.44405	9.60971	9.40647	9.48078	9.45569	9.73204	9.23921	9.35759	9.29413	9.40372	9.26754	9.13572	9.23977	9.69368	8.17328	9.60483
A_09_P019076	euchromatic gene	9.98735	8.46894	10.4573	9.45239	10.0517	9.96698	10.1246	9.76357	10.2419	9.82159	10.2196	9.72433	9.72097	9.83247	9.9184	9.51984	9.63416	9.64267	10.0789	8.65009	10.2277
A_09_P019081	euchromatic gene	10.1358	8.66228	10.4469	9.39291	9.97568	10.0565	10.0755	9.86266	10.2	10.0568	9.96823	9.88168	9.71522	9.76358	9.75106	9.61151	9.58136	9.69253	10.1813	8.77662	10.2306
A_09_P019086	euchromatic gene	8.40909	7.33271	8.83705	8.34641	8.67207	8.64196	9.15813	8.61079	8.7372	8.56466	8.63984	8.37888	8.53499	8.60404	8.41445	8.43359	8.55131	8.45834	8.82474	7.60376	8.90227
A_09_P019096	euchromatic gene	9.7484	8.0188	9.59226	8.55126	9.99879	10.2034	9.43517	9.74264	9.96594	9.74569	10.3238	8.85704	8.90463	9.69423	9.5973	9.66801	8.87771	9.56777	9.13146	7.71049	9.46836
A_09_P019101	euchromatic gene	9.38076	7.92816	9.35643	8.39007	9.44263	9.1556	9.59206	9.17546	9.45605	9.26077	9.67659	9.1131	9.12533	9.01816	9.25391	8.88599	9.04336	9.01488	9.41355	8.30106	9.58964
A_09_P019106	euchromatic gene	9.38684	8.06106	9.39685	8.49773	9.30729	9.25892	9.72733	9.49236	9.42924	9.47108	9.42779	9.04061	9.22466	9.35986	9.31036	9.06219	9.20271	9.22864	9.48776	8.22837	9.72901
A_09_P019111	euchromatic gene	10.4976	8.80396	10.688	9.64146	10.6578	10.576	10.4032	10.4988	10.6652	10.5112	10.8095	9.74309	9.77409	10.252	10.3111	10.1462	9.67228	10.2813	9.88328	8.82419	10.2653
A_09_P019116	euchromatic gene	10.5246	9.30905	10.3357	9.8817	10.6274	10.5997	10.6106	10.6552	10.5609	10.6277	10.6532	10.1342	10.1643	10.5656	10.5198	10.3003	10.1204	10.3806	10.268	9.47669	10.7529
A_09_P019121	euchromatic gene	10.6603	9.00635	10.3787	9.88208	10.5674	10.5366	9.97284	10.4543	10.6488	10.4762	10.6064	9.47217	9.41121	10.3272	10.1514	10.1668	9.28964	10.1544	9.5523	8.29512	10.0375
A_09_P019126	euchromatic gene	10.207	8.76534	10.7881	9.94573	10.3059	10.4998	10.3924	10.3895	10.5472	10.2589	10.7117	9.98165	10.0344	10.3422	10.2926	10.289	10.0188	10.0464	10.2907	9.07221	10.595
A_09_P019131	euchromatic gene	9.12929	7.77694	9.77635	8.73214	9.05497	9.09075	9.33149	9.1439	9.04964	8.944	8.97753	8.8954	9.0553	8.97377	9.11924	9.00607	8.97735	8.81413	9.26633	8.09596	9.49608
A_09_P019136	euchromatic gene	10.0558	8.39449	10.6053	9.25889	10.2286	10.3061	10.1813	10.0505	10.2925	10.1965	10.3283	9.95193	9.98797	9.9347	9.95267	9.87858	9.70849	9.9112	10.3817	8.52118	10.3795
A_09_P019141	euchromatic gene	9.84603	9.27687	10.7963	10.5913	10.6404	10.4795	10.0933	10.2999	10.416	10.27	10.352	9.89044	9.89061	9.88442	10.0584	9.98726	9.92384	10.0731	10.1428	9.69069	10.6787
A_09_P019146	euchromatic gene	9.44357	7.76267	9.68951	8.82945	9.37712	9.29715	9.79498	9.55696	9.48931	9.49729	9.33188	9.24275	9.38368	9.22879	9.24564	9.05036	9.18285	9.24973	9.6006	8.1277	9.67254
A_09_P019151	euchromatic gene	10.2349	8.37735	9.7313	8.8101	9.98343	9.909	10.3156	9.937	10.0402	10.1031	10.1054	9.75081	9.79175	10.025	10.1263	9.55542	9.7478	9.71973	10.1404	8.84467	10.5459
A_09_P019156	euchromatic gene	10.0406	8.48567	10.3438	9.2824	10.1125	10.3058	10.3529	9.90689	9.73682	9.99254	10.3698	9.44706	9.72237	9.72331	9.78441	9.76536	9.73479	9.70489	10.0345	8.5737	10.0148
A_09_P019161	euchromatic gene	9.25837	7.8784	9.79603	9.00658	9.30584	9.10039	9.48969	9.3076	9.16163	9.28869	9.31987	8.96604	9.26288	8.94607	9.07541	9.14383	9.05781	9.24209	9.45278	8.29432	9.70693
A_09_P019166	euchromatic gene	9.59734	7.98936	9.80222	8.98813	9.23295	9.2171	10.0053	9.39994	9.25977	9.39308	9.48117	9.18449	9.37208	9.25992	9.24771	9.11841	9.42651	9.28476	9.53426	8.66256	9.90722
A_09_P019171	euchromatic gene	9.40126	7.74172	9.35765	8.5144	9.35193	9.51708	9.69899	9.02891	9.41109	9.26756	9.50066	8.94695	9.17264	9.03697	8.94261	9.15034	9.07687	9.00369	9.33658	8.12339	9.50684
A_09_P019176	euchromatic gene	9.88952	8.16712	9.99974	8.80196	9.783	9.73747	10.2029	9.93369	9.84848	9.95189	9.87445	9.64625	9.63674	9.70756	9.80578	9.65935	9.53227	9.79037	9.91326	8.6008	10.1245
A_09_P019181	euchromatic gene	10.3494	8.6927	10.2757	9.16662	10.0863	10.1279	10.6707	10.2237	10.2705	10.3895	10.3778	10.1505	10.2481	10.198	10.1585	10.0331	10.085	10.1352	10.4795	8.96008	10.7513
A_09_P019186	euchromatic gene	10.9437	10.1289	10.7443	10.6303	11.0853	11.2457	10.186	10.7529	11.1409	10.8724	11.2117	9.91652	9.72074	10.5635	10.6222	10.8817	9.85012	10.6651	9.92258	9.29873	10.3546
A_09_P019191	euchromatic gene	11.6292	10.8248	11.9901	11.7755	11.9185	12.0054	11.5212	11.8415	11.9482	11.8133	12.0116	10.9629	10.9426	11.7053	11.7302	11.8788	10.8438	11.8263	10.9357	10.6566	11.6158
A_09_P019196	euchromatic gene	9.04521	7.83373	9.44571	8.44699	8.95144	8.9966	9.38846	9.00752	9.07324	8.96936	9.26092	8.7529	8.99783	8.84604	9.01816	8.81892	8.86021	8.9959	9.08744	8.0278	9.36061
A_09_P019201	euchromatic gene	9.94986	8.18773	10.0224	8.86895	9.96963	10.3352	9.7005	9.87896	10.2084	9.94223	10.4321	9.38218	9.37742	9.75297	9.74152	9.56682	9.32164	9.7419	9.60597	8.06888	9.87864
A_09_P019206	euchromatic gene	9.62705	7.79485	9.00545	8.23451	9.15735	9.05583	9.69162	9.31449	9.18029	9.31027	9.36495	9.15863	9.26404	9.03942	8.96255	8.84885	9.18533	9.13924	9.4688	8.18385	9.61503
A_09_P019211	euchromatic gene	9.38534	7.88073	9.48668	8.69295	9.22559	9.23942	9.96666	9.4156	9.28023	9.41059	9.33791	9.32585	9.44158	9.40289	9.27174	9.14326	9.38847	9.30598	9.74986	8.31669	9.96447
A_09_P019216	euchromatic gene	9.84015	8.2008	9.73655	8.88387	9.66788	9.52603	10.0265	9.69601	9.62918	9.68413	9.73644	9.36827	9.47694	9.62396	9.72461	9.44282	9.36705	9.64123	9.76407	9.53394	10.0608
A_09_P019221	euchromatic gene	8.53631	7.45497	9.10824	8.26757	8.83626	8.65533	9.13634	8.67883	9.01422	8.67427	9.03753	8.57831	8.59762	8.53887	8.62075	8.42012	8.51927	8.54586	8.76321	7.73852	9.20654
A_09_P019226	euchromatic gene	9.23876	7.80567	9.45176	8.37257	9.15795	9.38587	9.4578	9.19673	9.37452	9.29927	9.43501	9.06923	9.23314	9.2523	9.83099	9.11153	9.12655	9.09137	9.53028	8.08951	9.74643
A_09_P019231	euchromatic gene	10.4088	8.79786	10.6727	9.61992	10.5343	10.6829	10.6837	10.6227	10.6853	10.4709	10.8642	9.98342	10.0537	10.4342	10.2896	10.1432	9.9753	10.2576	10.3187	9.05915	10.5623
A_09_P019236	euchromatic gene	9.94863	8.35201	9.77269	8.83906	9.49378	9.38245	9.74257	9.58637	9.60955	9.58577	9.6259	9.65414	9.67158	9.46878	9.56095	9.18103	9.53125	9.47672	9.93371	8.48629	10.0968
A_09_P019241	euchromatic gene	8.87804	7.67996	8.47228	7.9487	8.73365	8.47635	8.95883	8.95481	8.73618	8.85129	8.66478	8.54571	8.73905	8.52621	8.64979	8.69381	8.66675	8.64496	8.7717	7.82591	8.94371
A_09_P019246	euchromatic gene	8.93473	7.53333	8.80165	8.11797	8.59074	8.70432	9.2448	8.73949	8.90361	8.76641	8.70967	8.83596	8.8048	8.70749	8.73427	8.54759	8.73655	8.59809	8.96302	7.75625	9.00836
A_09_P019251	euchromatic gene	9.89037	8.13822	10.1202	9.00735	9.86257	9.93186	10.198	9.99751	10.0304	9.79681	9.86279	9.51591	9.59926	9.57543	9.58708	9.4113	9.54319	9.56242	9.85254	8.54396	9.99691
A_09_P019256	euchromatic gene	10.0059	8.78441	10.1533	9.05407	9.7745	9.84672	10.2011	9.97118	10.1263	10.0309	10.0361	9.5655	9.56663	9.99274	9.75159	9.52643	9.47897	9.65594	9.82664	8.38401	10.2324
A_09_P019261	euchromatic gene	9.24375	7.94382	10.0363	9.00317	9.50722	9.68833	9.57858	9.29972	9.77354	9.22281	9.64819	9.04469	9.12074	9.14054	9.07243	9.06203	9.1156	9.08036	9.52637	8.14877	9.51267
A_09_P019266	euchromatic gene	9.59697	8.11382	9.58845	8.70402	9.39998	9.49849	9.74296	9.57442	9.63391	9.22758	9.43765	9.45135	9.31649	9.17943	9.10038	9.34965	9.34873	9.21685	9.68687	8.34096	9.82364
A_09_P019271	euchromatic gene	11.1399	10.3961	10.7306	10.6663	11.2643	11.0788	11.2038	11.0388	11.1904	11.317	11.2291	10.7052	10.72	11.1167	11.2608	11.3095	10.6207	11.1094	10.8375	10.5134	11.4217
A_09_P019276	euchromatic gene	11.331	10.4109	10.9306	10.7795	11.2605	11.2387	11.5531	11.3275	11.2823	11.6618	11.3664	11.3819	11.3415	11.3269	11.3855	11.3519	11.2141	11.4248	11.5424	11.1591	11.9047
A_09_P019281	euchromatic gene	9.05046	7.55291	9.0591	8.29653	8.95116	9.09738	9.26736	8.95812	9.01751	8.94638	9.22321	8.78748	8.97344	8.87217	8.84553	8.6905	8.86016	8.90214	9.15279	7.91874	9.30598
A_09_P019286	euchromatic gene	9.83565	8.98267	9.86429	9.23926	9.76241	9.90339	9.81328	9.74459	9.84552	9.7044	10.0933	9.45016	9.45209	9.68368	9.78147	9.6279	9.74083	9.68502	9.87206	8.88317	9.89087
A_09_P019291	euchromatic gene	9.6281	8.26856	9.54512	8.92722	9.6461	9.60661	9.6435	9.65473	9.69104	9.77811	9.60852	8.88948	8.92809	9.2388	9.38192	9.38788	8.92732	9.52937	9.11622	8.1389	9.37092
A_09_P019296	euchromatic gene	9.34847	8.05639	9.46061	8.90217	9.49884	9.26397	9.09846	9.03902	9.26281	9.14078	9.4774	8.84626	9.04043	8.9538	8.91585	8.77054	8.95351	8.84356	9.15605	8.12004	9.90251
A_09_P019301	euchromatic gene	10.1122	8.49771	10.5115	9.20143	10.3135	10.4395	10.3474	10.2217	10.3394	10.279	10.5582	9.86546	9.67546	10.096	9.97317	10.1838	9.66745	10.1033	10.3749	8.5812	10.2772
A_09_P019311	euchromatic gene	9.18346	7.84172	9.65652	8.61408	9.25481	9.31028	9.49484	9.15869	9.25597	9.01262	9.36432	9.16516	9.17091	9.14499	8.88854	8.87253	9.12956	8.90325	9.49995	8.14916	9.70349
A_09_P019316	euchromatic gene	9.59927	7.94135	9.87971	9.00917	9.62823	9.4477	9.91308	9.48845	9.64488	9.52068	9.6009	9.44427	9.60632	9.38703	9.23325	9.15839	9.52243	9.23723	9.86213	8.44623	10.0531
A_09_P019321	euchromatic gene	9.45634	7.98841	10.0015	8.91876	9.45029	9.29463	9.61205	9.35858	9.3507	9.41548	9.51266	9.10275	9.18856	9.33071	9.31525	9.03674	9.784	9.13867	9.44169	8.11192	9.62786
A_09_P019326	euchromatic gene	9.4139	8.15574	8.9166	8.43451	9.19766	9.26435	9.57477	9.22699	9.33053	9.28225	9.40323	8.91655	9.0195	9.47311	9.40881	9.22006	9.03321	9.1406	9.25608	8.04781	9.48458
A_09_P019331	euchromatic gene	9.65719	8.09686	9.01349	8.22205	9.40406	9.39779	9.79566	9.57311	9.48447	9.78155	9.60945	9.16752	9.24212	9.63354	9.65416	9.45957	9.11837	9.42671	9.39823	8.16839	9.73532
A_09_P019336	euchromatic gene	9.94685	8.07794	9.57673	8.65581	9.68492	9.58895	10.1544	9.62366	9.67842	9.75797	9.79537	9.49748	9.67926	9.55758	9.53147	9.29876	9.58527	9.48796	9.78055	8.40126	9.976
A_09_P019341	euchromatic gene	9.51218	7.76061	9.17477	8.56405	9.04926	8.7843	9.5651	9.05448	8.95309	9.23033	8.9109	8.85363	8.97168	8.83059	8.91889	8.74601	8.9297	8.72911	9.10864	8.00792	9.39584
A_09_P019346	euchromatic gene	9.13544	7.83999	8.40227	7.92457	8.79558	8.8321	8.8649	8.9085	8.94088	9.15275	9.0939	8.29773	8.62854	9.07789	8.86243	8.84156	8.42143	8.71865	8.61281	7.67792	8.83437
A_09_P019351	euchromatic gene	9.56073	8.0529	10.1794	9.04665	9.71771	10.2931	9.99602	9.71431	9.8604	9.71066	10.1	9.39472	9.59816	9.57565	9.71433	9.75614	9.42816	9.55933	9.88429	8.41925	10.1639
A_09_P019356	euchromatic gene	9.39466	7.94879	9.38146	8.68035	9.13192	9.03917	9.74923	9.27685	9.19627	9.24781	9.17353	9.13429	9.28878	9.12302	9.13515	8.92546	9.22821	9.08415	9.5053	8.30182	9.69272
A_09_P019361	euchromatic gene	10.0572	8.28868	9.96443	9.17321	9.72881	9.64942	10.1807	9.81417	9.83561	9.96652	10.0134	9.57994	9.72388	9.76425	9.81982	9.40176	9.5263	9.58664	9.8451	8.53215	10.1804
A_09_P019366	euchromatic gene	9.51463	7.94286	9.67312	8.53442	9.56519	9.67743	9.59638	9.7803	9.74281	9.50388	9.9818	9.01615	8.95376	9.54577	9.46175	9.31055	8.9242	9.34186	9.21021	7.82149	9.39596
A_09_P019371	euchromatic gene	10.1855	8.24933	9.91807	8.6782	9.90903	9.90849	10.3833	10.4078	10.1072	10.413	10.27	9.74528	9.89422	10.079	10.3712	10.1043	9.78989	9.94853	10.1269	8.61918	10.427
A_09_P019376	euchromatic gene	8.40509	7.24819	8.56122	7.94372	8.49256	8.46479	8.89102	8.57299	8.47004	8.50839	8.5116	8.23038	8.42904	8.40891	8.45754	8.47611	8.33665	8.43321	8.50253	7.54961	8.72862
A_09_P019381	euchromatic gene	10.3882	9.82247	9.88579	9.75771	10.1628	10.244	10.0528	10.7108	10.3976	10.6504	10.3648	9.91199	9.87578	10.3796	10.3067	10.4118	10.1409	10.6396	10.2492	9.81534	10.3631
A_09_P019386	euchromatic gene	9.22646	8.3264	9.35922	9.05955	9.37349	9.47196	9.01987	9.64859	9.26888	9.55522	9.32021	8.64477	8.81422	9.29248	9.24466	9.40594	8.86935	9.32019	9.04582	8.33793	9.43296
A_09_P019391	euchromatic gene	10.9023	10.2512	11.2479	11.0819	11.3835	11.2301	11.2903	11.453	11.4489	11.624	11.5689	10.8683	10.869	11.101	11.2509	11.6097	10.7729	11.5701	10.8696	10.8451	11.3049
A_09_P019396	euchromatic gene	9.42305	7.99942	9.45942	8.38624	9.3475	9.36933	9.53349	9.25714	9.37046	9.25266	9.64521	8.98444	9.15731	9.16879	9.15479	8.77951	9.12337	9.0687	9.37622	8.32246	9.67069
A_09_P019401	euchromatic gene	9.68163	8.06344	9.8317	9.02309	9.70433	9.90055	9.90853	9.48984	9.82814	9.56716	9.8884	9.59285	9.38723	9.44633	9.53022	9.51393	9.33736	9.37464	9.56519	8.3881	9.74392
A_09_P019406	euchromatic gene	9.49043	7.78619	9.28202	8.40821	9.3307	9.16955	9.58166	9.41145	9.39973	9.54966	9.48813	8.82466	9.00114	9.2713	9.2676	9.08575	8.88355	9.42541	9.1527	7.81391	9.54992
A_09_P019411	euchromatic gene	9.04942	7.76771	9.41736	8.36615	9.13841	9.22227	9.332	9.0037	9.16511	8.84473	9.38548	9.02182	9.12882	9.03637	8.79542	8.82989	9.04104	8.77709	9.38997	8.11633	9.46401
A_09_P019416	euchromatic gene	10.6227	8.55568	10.5302	9.08999	10.399	10.6017	10.923	10.5475	10.7728	10.6649	10.9711	10.3924	10.4243	10.602	10.6207	10.5421	10.1992	10.4626	10.5759	8.86114	10.9169
A_09_P019421	euchromatic gene	9.41152	8.14898	9.59173	8.57114	9.40156	9.37574	9.51025	9.27315	9.49414	9.3622	9.47418	9.09096	9.1583	9.24699	9.2656	9.1901	9.17352	9.1234	9.53996	8.13687	9.71206
A_09_P019426	euchromatic gene	8.50172	7.55927	8.87514	8.28377	9.01159	9.21507	9.21673	8.74206	8.94527	8.58147	9.1694	8.52583	8.61178	8.68243	8.53712	8.77523	8.64732	8.63392	8.78911	7.87408	9.10267
A_09_P019431	euchromatic gene	10.1926	8.16944	10.0336	8.92978	9.82599	9.7491	10.3904	9.95783	9.87119	10.0158	10.0464	9.78122	9.80985	9.8387	9.89346	9.7308	9.70083	9.76737	9.92421	8.38838	10.1764
A_09_P019436	euchromatic gene	9.54269	7.98523	9.29717	8.45194	9.62557	9.56485	9.52603	9.50779	9.75753	9.40925	9.89224	8.92428	8.86278	9.36444	9.26317	9.0923	8.7744	9.21477	9.05002	7.97571	9.36217
A_09_P019441	euchromatic gene	9.11493	7.9036	9.11844	8.82985	9.32774	9.47798	9.24277	9.06321	9.46275	9.22143	9.58521	9.05704	9.04717	9.04518	8.9776	9.15903	9.01002	9.07081	9.15026	8.38015	9.33668
A_09_P019446	euchromatic gene	9.57102	8.15158	10.0187	9.10922	9.71482	9.93292	9.89692	9.76785	9.74361	9.44741	9.94415	9.54831	9.25626	9.44979	9.16251	9.50139	9.63918	9.32331	9.71124	8.29677	9.87756
A_09_P019451	euchromatic gene	10.2304	8.31347	10.0772	8.79539	9.88177	9.82959	10.15	10.2275	10.1864	10.0975	10.3713	9.52595	9.71904	10.0778	10.1912	9.77147	9.5338	9.84277	10.0082	8.42168	10.2317
A_09_P019456	euchromatic gene	9.36469	7.82497	9.51194	8.38888	9.17989	9.50065	9.84908	9.21938	9.46224	9.15186	9.67932	9.43666	9.20991	9.23745	9.23022	8.93829	9.13265	9.01811	9.51065	8.32606	9.67677
A_09_P019461	euchromatic gene	10.1584	8.78651	10.3928	9.53502	10.4053	10.6863	10.459	10.288	10.6087	10.1812	10.8107	9.84101	9.85892	10.0931	9.93592	10.1066	9.81385	9.97312	10.1221	8.85056	10.3811
A_09_P019466	euchromatic gene	9.3282	8.24168	9.08281	8.72483	9.14299	8.84302	9.48206	9.42364	9.06417	9.28188	9.16387	9.08879	9.13539	9.03744	9.11595	8.9806	9.01073	9.10235	9.26513	8.93204	9.53471
A_09_P019471	euchromatic gene	9.02989	7.57163	9.21219	8.51399	8.99692	9.12908	9.15367	8.81337	9.00443	9.03356	9.10467	8.70009	8.82848	8.75175	8.64551	8.85484	8.74367	8.73044	9.10604	7.87952	9.17812
A_09_P019476	euchromatic gene	9.94249	8.59314	10.0777	9.4712	10.0015	10.1605	10.061	9.84618	9.99943	9.9577	10.0424	9.94203	9.79483	9.78949	9.80962	9.86738	9.75144	9.7494	10.0656	8.98187	10.2352
A_09_P019481	euchromatic gene	10.9801	9.98378	10.3857	9.61554	10.3172	10.1874	10.9508	10.5196	10.2869	10.6657	10.4761	10.2247	10.2823	10.4215	10.4931	10.2342	10.2181	10.2632	10.4469	9.6576	10.9352
A_09_P019486	euchromatic gene	9.0384	7.8691	9.79685	8.77858	9.43766	9.42998	9.51615	9.07727	9.32218	9.11222	9.63012	9.06371	9.23979	9.07104	9.19528	9.00629	9.00996	9.0142	9.43355	8.12239	9.55393
A_09_P019491	euchromatic gene	9.81466	8.06035	9.65833	8.72789	9.86887	9.80408	9.71	9.76899	9.92412	9.70289	10.0301	9.35214	9.41276	9.49938	9.46433	9.3038	9.2881	9.4168	9.68082	8.33523	9.85808
A_09_P019496	euchromatic gene	8.59828	7.39361	9.39262	8.2152	9.09472	9.11348	9.35353	8.57774	8.70843	8.47447	8.75843	8.96269	8.71397	8.58412	8.44789	8.33496	8.8962	8.32059	9.10062	7.75448	9.20065
A_09_P019501	euchromatic gene	11.027	10.6506	11.4172	11.2948	11.7018	11.4999	11.6093	11.7277	11.3998	11.6161	11.4688	10.6897	10.5334	11.1794	11.1456	11.6834	10.6642	11.5639	10.6005	10.494	11.0814
A_09_P019506	euchromatic gene	9.18725	7.63776	9.39698	8.14981	9.34926	9.24235	9.82634	8.97643	8.98469	8.95151	9.00047	9.28703	9.1148	9.02772	9.07474	8.82966	9.33288	8.79785	9.55438	8.03121	9.70601
A_09_P019511	euchromatic gene	9.54714	7.83858	9.66268	8.46904	9.89048	9.88022	10.27	9.36186	9.66845	9.39294	9.62623	9.80114	9.37943	9.27384	9.22334	9.03567	9.16096	9.18932	9.82066	8.20316	9.95885
A_09_P019516	euchromatic gene	9.33842	8.00001	9.88053	8.95064	9.73347	9.72596	9.72458	9.21803	9.57619	9.53957	9.78004	9.15774	9.26927	9.06769	9.01188	9.2546	9.29531	9.32363	9.65004	8.15419	9.70569
A_09_P019521	euchromatic gene	9.07725	7.8422	9.50926	8.6081	9.13084	9.34198	9.39847	9.22734	9.29851	8.78725	9.24157	9.02743	8.90527	8.89728	8.88435	8.97643	8.90286	8.92519	9.18737	7.89312	9.43249
A_09_P019526	euchromatic gene	8.81179	7.56813	9.31354	8.64965	8.86289	8.86991	9.15424	8.83585	8.78609	8.78183	8.96172	8.69723	8.80804	8.84775	8.71444	8.74178	8.84758	8.76847	8.9307	7.8595	9.07243
A_09_P019531	euchromatic gene	9.32001	7.7653	9.50216	8.74542	9.37527	9.57231	9.76555	8.9236	9.37066	9.19158	9.47243	8.66007	8.9213	9.18947	9.02027	9.09768	8.91482	9.06304	9.37146	8.06681	9.59381
A_09_P019536	euchromatic gene	9.23985	7.75997	9.38743	8.71339	9.01251	8.80359	9.59746	9.08556	8.89912	9.29756	8.99674	9.00711	9.11609	9.1433	8.98806	8.87525	9.05445	8.98927	9.35651	8.20379	9.57478
A_09_P019541	euchromatic gene	10.1505	8.67096	10.4059	9.59299	10.1159	10.1333	10.2819	10.3167	10.3807	10.2614	10.4213	9.80311	9.87383	9.94291	10.1413	10.0096	9.72777	10.0719	10.1638	8.93305	10.43
A_09_P019546	euchromatic gene	9.80092	8.34246	10.2568	9.37865	9.65807	9.6191	10.0845	9.68753	9.65071	9.78121	9.78352	9.46355	9.63645	9.64165	9.54089	9.4637	9.61806	9.52794	9.74667	8.40047	10.1499
A_09_P019551	euchromatic gene	9.93541	9.25173	10.2601	9.51901	9.69387	9.66848	11.3203	10.6673	9.66395	9.90298	9.61886	9.74534	9.73985	9.59322	9.65786	9.66071	9.93591	9.72901	10.0985	9.93014	10.3658
A_09_P019556	euchromatic gene	8.36269	7.36706	8.86234	7.9396	8.59441	8.57828	8.97054	8.89502	8.79508	8.46368	8.60684	8.37551	8.52458	8.64643	8.43111	8.29736	8.63747	8.40635	8.78308	7.58958	9.04977
A_09_P019561	euchromatic gene	8.9802	8.01165	9.66751	8.98746	9.18152	9.24957	9.20757	9.28936	9.33421	9.16027	9.53484	9.04227	8.89815	8.8656	8.9247	9.14277	9.02001	9.0392	9.25244	8.44019	9.53282
A_09_P019566	euchromatic gene	10.1771	8.23502	10.5002	9.25386	10.1373	10.2925	10.1247	9.85411	10.3388	10.0459	10.5137	9.72254	9.74372	10.0278	9.90459	9.54262	9.59273	9.75018	9.93319	8.45297	10.1715
A_09_P019571	euchromatic gene	9.96316	8.38954	9.84546	8.83944	9.88847	9.67029	10.0471	9.65633	9.73549	9.60757	9.96817	9.57719	9.59723	9.55408	9.62512	9.25833	9.46694	9.32898	9.8202	8.64148	10.1667
A_09_P019576	euchromatic gene	9.7968	8.45688	9.9603	9.03126	9.81903	9.75302	10.5058	10.2657	9.73032	10.0031	9.90017	9.57468	9.64015	9.63938	9.70741	9.39606	9.47965	9.67383	9.78247	8.85337	10.0974
A_09_P019581	euchromatic gene	10.6071	10.1332	11.2429	11.0432	11.3429	11.3739	11.5518	11.7359	11.1696	11.69	11.3147	10.7826	10.7941	10.627	10.5399	11.657	11.1099	11.5314	11.373	10.7838	11.3908
A_09_P019586	euchromatic gene	9.8904	8.20265	10.1228	8.7885	9.9833	9.9404	10.0387	9.90642	10.1441	9.88133	10.1593	9.45598	9.66111	9.71706	9.86579	9.72496	9.51995	9.66334	10.027	8.43151	10.1784
A_09_P019591	euchromatic gene	9.41276	8.10298	9.4513	8.52866	9.45663	9.59627	9.71175	9.47925	9.66006	9.30962	9.71377	8.9253	9.08202	9.30783	9.21668	9.23758	8.98015	9.16883	9.18845	7.9311	9.50479
A_09_P019596	euchromatic gene	9.85676	8.22947	9.29305	8.39127	9.66801	9.61268	9.71424	9.72821	9.70128	9.94129	9.88109	9.27775	9.31311	9.82929	9.90053	9.54119	9.2226	9.75254	9.55603	8.12458	9.84985
A_09_P019601	euchromatic gene	9.62092	8.19331	9.99335	9.09551	9.4496	9.57282	9.60069	9.45819	9.52607	9.49123	9.60146	9.20973	9.30193	9.22083	9.12713	9.2561	9.34792	9.20555	9.8634	8.22012	9.78465
A_09_P019606	euchromatic gene	9.34547	7.70066	9.63128	8.76925	9.25408	9.09547	9.40028	9.23693	9.29463	9.16193	9.31153	8.98852	9.15416	9.17308	9.10451	8.88647	9.0808	9.05867	9.35214	8.07911	9.57345
A_09_P019611	euchromatic gene	9.4965	7.81	9.11187	8.42029	9.30161	9.215	9.5012	10.0356	9.41212	8.97485	9.42493	8.92023	9.30797	9.02844	8.88171	9.07773	9.17245	9.06864	9.45217	8.02274	9.75469
A_09_P019616	euchromatic gene	9.66814	8.28066	10.0144	8.91468	9.601	9.76617	9.78217	9.49636	9.79463	9.49982	9.76966	9.50893	9.38414	9.38506	9.37436	9.30292	9.30456	9.23763	9.65279	8.28668	9.80663
A_09_P019621	euchromatic gene	10.0021	8.58064	10.3214	9.02439	10.0387	10.2492	10.3716	9.87906	10.1563	9.98808	10.2555	10.0223	9.82165	9.75493	9.75806	9.77454	9.79287	9.71134	10.1265	8.7281	10.3402
A_09_P019626	euchromatic gene	10.0743	8.59749	10.3552	9.10842	10.1799	10.3241	10.2944	9.96601	10.4221	10.0235	10.5415	9.87091	9.90239	9.68433	9.77219	9.68746	9.70031	9.79158	10.2801	8.87977	10.5268
A_09_P019631	euchromatic gene	9.43396	7.98551	9.4304	8.09572	9.4215	9.41748	9.38348	9.33154	9.68866	9.35563	9.77431	8.99878	9.03533	9.11364	9.44322	9.05111	8.99758	9.21146	9.25798	8.00909	9.65179
A_09_P019636	euchromatic gene	9.2488	7.75523	9.36224	8.47694	9.23852	9.30322	9.58556	9.18747	9.35311	9.02425	9.53702	8.96977	9.06098	9.20123	9.23114	9.0898	9.04463	9.0279	9.29421	7.99688	9.60149
A_09_P019641	euchromatic gene	9.1332	7.72542	9.31116	8.3687	8.91237	9.07238	9.35317	9.0546	9.06763	8.8873	9.03118	8.94114	8.9494	9.06018	9.02087	8.80452	8.95194	8.7648	9.39491	7.96866	9.51904
A_09_P019646	euchromatic gene	10.74	8.73228	10.6653	9.51115	10.598	10.5289	10.7241	10.515	10.7212	10.4516	10.7928	10.3009	10.4002	10.1536	10.1895	9.90216	10.2658	10.057	10.6566	9.16878	10.7565
A_09_P019651	euchromatic gene	8.93928	7.90236	9.22601	8.46315	9.16786	9.23866	9.33255	9.10514	9.22256	9.14635	9.22611	8.6342	8.90451	8.92539	8.96776	8.99271	8.83379	9.07661	9.07507	7.86358	9.1975
A_09_P019656	euchromatic gene	10.8495	10.0328	11.504	10.8008	11.3365	11.1464	10.9186	11.1263	11.0603	10.9736	11.0762	10.5998	10.5272	10.7624	10.8913	10.9688	10.5598	10.8818	10.8471	10.3071	11.2612
A_09_P019666	euchromatic gene	9.89991	8.74207	10.4728	9.63782	10.0496	10.1501	10.0549	10.1156	10.1138	10.0441	10.1215	9.58794	9.82028	9.74394	9.79173	9.73027	9.55726	9.80533	10.061	8.83455	10.2065
A_09_P019671	euchromatic gene	8.30557	7.24895	8.56363	8.17951	8.32679	8.3814	8.3349	8.10241	8.07118	8.28552	8.08142	8.09228	8.56533	8.08802	7.97535	8.1795	8.28039	8.18724	8.33852	7.49416	8.39227
A_09_P019676	euchromatic gene	9.8742	8.43216	10.3205	9.34162	10.0456	10.2392	10.4562	10.0377	10.2717	9.973	10.485	10	9.9877	10.0663	10.0158	9.81021	9.87364	9.80068	10.2206	8.95973	10.5053
A_09_P019681	euchromatic gene	8.60915	7.38149	8.995	8.484	8.58579	8.5882	8.83595	8.14256	8.50584	8.54552	8.54495	8.10926	8.30533	8.35009	8.18097	8.33156	8.45324	8.42906	8.73785	7.63158	8.69673
A_09_P019686	euchromatic gene	8.86646	7.75631	8.26316	7.70845	9.01102	9.08072	8.54184	8.97976	9.21811	8.93576	9.34086	7.99774	8.09387	9.07998	8.89039	8.7793	8.01809	8.81838	8.15102	7.26606	8.42478
A_09_P019691	euchromatic gene	9.89187	8.21438	10.1009	9.02063	9.82396	9.8968	9.96344	9.81004	10.1837	9.82311	10.0686	9.40988	9.53559	9.73656	9.82555	9.67089	9.33651	9.67697	9.8498	8.338	9.97396
A_09_P019696	euchromatic gene	9.09339	7.62833	9.12979	8.29495	9.16555	9.10026	9.21619	9.20112	9.07703	9.07483	9.0984	8.84926	8.93391	8.96061	9.02007	8.83402	8.91908	8.8824	9.23942	8.11781	9.40574
A_09_P019706	euchromatic gene	9.00341	7.77313	9.652	8.93382	9.10571	9.16074	9.21988	9.04898	9.24553	9.15427	9.32028	8.94991	9.11633	8.67945	8.81569	8.85707	8.93996	8.99243	9.38126	8.12196	9.59572
A_09_P019711	euchromatic gene	9.72584	8.18525	9.77098	8.94305	9.3592	9.36805	10.0516	9.60893	9.42674	9.77589	9.46672	9.52135	9.54859	9.53823	9.53622	9.41292	9.51602	9.60357	9.86886	8.58617	10.0928
A_09_P019716	euchromatic gene	9.15503	7.90938	9.4786	9.06746	9.22821	9.1573	9.4982	9.37277	9.22461	9.38332	9.23547	8.96607	9.08734	9.36859	9.5601	9.253	8.96355	9.41506	9.22773	8.463	9.52977
A_09_P019721	euchromatic gene	10.1368	8.60902	10.8058	9.34958	10.189	10.4198	10.4506	9.8402	10.3685	10.0845	10.7054	9.71877	10.1386	9.94675	10.0933	9.84405	10.0064	9.92007	10.4137	8.96499	10.659
A_09_P019726	euchromatic gene	8.57099	7.38887	8.3573	7.90416	8.49215	8.28786	9.06922	8.52085	8.41412	8.68619	8.48382	8.54281	8.61022	8.46872	8.46777	8.38968	8.45081	8.73317	8.76492	7.66152	8.96243
A_09_P019731	euchromatic gene	12.327	12.049	12.2181	12.3172	12.5494	12.8198	13.005	12.7493	12.5153	13.1072	12.6735	12.4121	12.2104	12.5254	12.6481	13.3912	12.475	13.1569	12.3362	12.2925	12.8372
A_09_P019736	euchromatic gene	8.7177	7.37981	8.63453	11.6118	8.60959	8.58356	8.68811	8.36643	8.58803	8.55181	8.66214	8.3294	8.47428	8.56167	8.5259	8.48018	8.32487	8.57967	8.61	7.50283	8.90026
A_09_P019741	euchromatic gene	9.19665	7.63693	9.49419	8.36995	9.25681	9.5491	9.48936	9.39316	9.41634	9.24619	9.53759	9.14212	9.08041	9.22874	9.2189	9.30354	9.07777	9.24064	9.45606	8.07273	9.55584
A_09_P019746	euchromatic gene	10.2545	8.51213	10.4833	9.36841	10.4189	10.6399	10.369	10.2544	10.5976	10.1389	10.8798	9.87232	9.79082	10.1231	9.98148	10.1084	9.73043	9.91882	10.0446	8.59276	10.2826
A_09_P019751	euchromatic gene	8.95614	7.6269	9.04319	8.51165	8.74718	8.74433	9.15005	8.80862	8.80334	8.74017	8.90729	8.65444	8.8089	8.67259	8.54391	8.75077	8.90206	8.60822	9.0027	7.81314	9.00939
A_09_P019756	euchromatic gene	9.16792	7.82859	9.65915	8.71912	9.00469	9.08036	9.24255	9.0112	9.11265	9.15075	9.12089	9.04431	9.08799	8.86462	8.99184	8.99634	8.99137	9.01329	9.29066	8.18143	9.43737
A_09_P019761	euchromatic gene	10.3192	8.49567	10.3395	9.10678	10.1655	10.3842	10.2262	10.2435	10.5493	10.3059	10.7089	9.6867	9.73638	10.2595	10.1745	10.0524	9.50916	9.90865	9.81079	8.32567	9.94632
A_09_P019766	euchromatic gene	9.94841	8.23742	9.71404	8.76147	9.91729	9.87381	10.0525	9.9764	9.8996	9.95817	10.0411	9.34065	9.49677	9.59554	9.64331	9.55378	9.3072	9.76899	9.79624	8.27107	9.95107
A_09_P019771	euchromatic gene	10.0243	8.23698	10.1066	9.02888	9.83523	9.92566	9.94555	9.90095	9.91885	9.91564	9.95944	9.54326	9.57041	9.62946	9.79598	9.57537	9.46374	9.60256	9.91425	8.5561	10.0244
A_09_P019776	euchromatic gene	8.68954	7.41288	9.20661	8.37038	8.65636	8.91214	8.84831	8.64324	9.00945	8.63601	9.10588	8.51435	8.4728	8.52583	8.47012	8.37974	8.41258	8.52128	8.61229	7.49702	8.69696
A_09_P019781	euchromatic gene	9.28608	8.54549	8.16555	7.88621	8.60372	8.54776	8.88908	9.07255	8.55263	8.94493	8.66019	8.7749	8.81776	9.23655	9.29917	8.83339	8.86442	8.9324	8.52154	9.95384	9.06896
A_09_P019786	euchromatic gene	9.95558	8.91077	10.6862	9.8846	9.99908	10.0977	10.3489	10.185	9.82596	10.154	9.86799	9.77398	10.0155	9.82259	9.7149	10.3578	9.84614	10.0643	10.0837	9.04204	10.3606
A_09_P019796	euchromatic gene	10.2849	8.42473	10.4743	8.94049	10.4518	10.5456	10.4659	10.3748	10.4611	10.4281	10.5978	9.92639	9.99091	10.0366	10.0924	10.1767	9.80196	10.1838	10.2162	8.69238	10.627
A_09_P019801	euchromatic gene	8.97471	7.93403	9.06599	8.80906	8.88369	8.70791	9.41636	9.25738	8.66485	9.131	8.91096	8.68955	9.15585	9.17907	9.07332	8.79534	8.71893	9.00715	9.00095	8.23591	9.49553
A_09_P019806	euchromatic gene	9.95917	8.17735	9.57245	8.61704	9.66802	9.53768	9.806	9.71409	9.72998	9.64331	9.85387	9.46383	9.5349	9.50566	9.52666	9.2399	9.46212	9.41636	9.76254	8.65402	9.94756
A_09_P019811	euchromatic gene	9.47767	7.80551	9.4763	8.36765	9.57507	9.68532	9.37075	9.63878	9.61864	9.48742	9.72639	8.87702	9.02674	9.3266	9.31403	9.25659	8.90671	9.30923	9.34078	7.87728	9.55083
A_09_P019816	euchromatic gene	9.2284	7.89156	10.0377	9.08811	9.61779	9.78665	9.78994	9.32642	9.58364	9.21303	9.71123	9.08647	9.27259	9.22693	9.22801	9.40922	9.20451	9.23337	9.63095	8.27321	9.71261
A_09_P019821	euchromatic gene	9.32131	8.04673	9.39039	8.43604	9.16662	9.29597	9.46167	9.33734	9.25402	9.089	10.1899	9.16763	9.24474	9.02855	9.2673	9.0004	9.13161	8.93579	9.55569	8.11733	9.70083
A_09_P019826	euchromatic gene	9.23243	7.80603	9.2467	8.34329	9.21583	9.29431	9.26091	9.04096	9.39232	9.17786	9.32808	8.89027	9.03847	9.07884	9.10822	9.09025	8.94328	9.07917	9.17116	8.02116	9.50272
A_09_P019831	euchromatic gene	9.98504	8.15616	9.5658	8.7844	10.069	10.0315	10.1311	9.92596	10.0395	9.82772	10.2244	9.54174	9.62769	9.78933	9.84108	9.64383	9.51724	9.76521	9.8122	8.76525	10.1334
A_09_P019836	euchromatic gene	10.0972	8.41026	9.96847	8.9772	9.98245	9.93729	10.3956	10.014	10.0781	10.0758	10.1827	9.80824	9.82985	10.0062	9.80969	9.75437	9.74426	9.94038	10.1645	8.72824	10.3708
A_09_P019841	euchromatic gene	9.11493	7.76393	9.4169	8.3967	9.276	9.53484	9.5998	9.25372	9.41178	9.15908	9.59395	9.1848	9.15771	9.20892	9.07128	9.25236	9.17479	9.06855	9.3585	8.08829	9.55011
A_09_P019846	euchromatic gene	9.27896	7.86907	9.36766	8.79539	9.25955	9.23859	9.60805	9.08543	9.36156	9.19543	9.39255	8.93467	9.05907	9.09374	8.97087	8.87525	8.96226	8.8829	9.17856	8.32621	9.44534
A_09_P019851	euchromatic gene	10.0181	8.27321	10.3993	8.83689	10.0433	10.1894	10.3755	10.1832	10.2863	10.0521	10.4084	9.71291	9.79031	9.99275	9.97615	9.8193	9.69829	9.88289	10.0593	8.48609	10.3304
A_09_P019856	euchromatic gene	8.9336	7.71617	9.19548	8.23946	9.12743	9.08753	9.02917	8.7456	9.04116	8.89299	9.52381	8.40087	8.71465	8.74147	8.76906	8.72655	8.58071	8.86202	8.79143	7.5304	9.027
A_09_P019861	euchromatic gene	9.3502	7.77324	9.60058	8.58202	9.35584	9.02579	9.63845	9.28453	9.26171	9.24415	9.31322	9.04219	9.21114	9.08089	9.30741	8.85799	9.20565	9.02436	9.59772	8.27423	9.69415
A_09_P019866	euchromatic gene	8.25946	7.26954	8.18649	7.70209	8.33914	7.98133	8.49191	8.01565	8.20665	7.96228	8.28998	8.09381	8.40741	8.10509	8.05236	7.77131	8.24656	7.9718	8.24684	7.48275	8.32051
A_09_P019871	euchromatic gene	9.78859	8.0232	10.1051	8.7559	10.0292	10.0109	10.1917	9.84902	9.99973	9.78922	10.0881	9.54826	9.65782	9.68059	9.90295	9.89118	9.44378	9.77991	9.93019	8.31501	10.1336
A_09_P019876	euchromatic gene	10.5442	8.51122	10.1203	8.90937	10.2371	10.3062	10.6942	10.5962	10.3732	10.6175	10.4451	10.1341	10.2909	10.4425	10.6689	10.2516	9.97959	10.4608	10.3782	8.76802	10.8182
A_09_P019881	euchromatic gene	9.53358	7.9929	9.15142	8.27609	9.39983	9.15001	9.91428	9.61757	9.2257	9.66801	9.42411	9.20365	9.37501	9.64145	9.46972	9.26351	9.22208	9.43389	9.59649	8.24884	9.94001
A_09_P019886	euchromatic gene	8.55905	7.23868	8.52634	7.96092	8.73389	8.75174	8.75228	8.34819	8.60205	8.48252	8.70175	8.29049	8.40925	8.39949	8.29394	8.30569	8.40929	8.35985	8.67045	7.57401	8.61904
A_09_P019891	euchromatic gene	9.77867	8.15393	9.87525	8.65251	9.84115	9.80756	9.86739	9.82993	9.93111	9.76935	9.93701	9.35796	9.3333	9.54044	9.33719	9.25693	9.15231	9.42938	9.62398	8.18536	9.84845
A_09_P019896	euchromatic gene	9.83639	8.04324	9.69477	8.54543	9.91266	9.98323	9.85333	10.0354	9.869	9.80088	9.90477	9.45772	9.48694	9.62338	9.69726	9.53247	9.34219	9.51163	9.71855	8.16679	9.91037
A_09_P019901	euchromatic gene	10.1408	8.62995	10.2424	9.46746	10.2331	10.3331	9.78495	10.2265	10.3321	10.0879	10.3845	9.08581	9.05746	9.92576	9.90653	9.76305	8.9428	9.81898	9.24232	8.11969	9.61608
A_09_P019906	euchromatic gene	10.1091	8.63695	10.5448	9.34275	10.1902	10.3601	10.287	10.0817	10.3812	10.1221	10.5798	9.88713	10.3456	10.0228	10.196	9.94677	10.023	9.98807	10.3248	8.78791	10.387
A_09_P019911	euchromatic gene	9.81336	8.57648	10.1652	9.3212	9.88569	9.99672	10.1672	9.90172	10.0676	9.80033	10.0875	9.64411	9.66644	9.78308	9.64563	9.78135	9.65013	9.61885	9.87283	8.98006	10.1995
A_09_P019916	euchromatic gene	10.0612	8.80105	10.1911	10.3389	10.3818	10.1979	10.53	10.2423	10.2716	10.5175	10.4301	9.87384	9.98733	10.0495	10.2651	10.6341	9.75057	10.5367	10.026	9.69158	10.3548
A_09_P019921	euchromatic gene	9.90142	8.37275	9.63751	8.83818	9.56775	9.36076	10.0191	9.69372	9.53991	9.79594	9.59361	9.23476	9.35708	9.68249	9.59854	9.42131	9.28266	9.51453	9.58299	8.53682	9.88246
A_09_P019926	euchromatic gene	8.7651	7.40537	8.97382	8.21596	8.71366	8.6385	9.25352	9.06134	8.88794	8.95749	8.83059	8.62177	8.73112	8.88749	8.87739	8.75529	8.63298	8.82661	9.08232	7.7985	9.30035
A_09_P019931	euchromatic gene	10.0157	8.27955	10.4374	9.21367	10.0753	10.1874	10.0315	10.1313	10.0865	10.0712	10.145	9.58832	9.71896	9.85347	9.99153	9.71393	9.52087	9.68362	10.0091	8.46526	10.1023
A_09_P019936	euchromatic gene	10.0808	8.77925	9.60066	8.67643	9.6853	9.60488	10.4169	9.79884	9.78925	9.97688	9.78833	9.53538	9.55589	9.62603	9.63942	9.51482	9.46319	9.64958	9.74006	8.96423	10.0955
A_09_P019941	euchromatic gene	10.0588	8.32469	10.511	9.33298	9.8525	9.99291	10.1827	9.80647	10.1899	9.65823	10.2113	9.77529	9.82751	9.75893	9.63257	9.76174	9.89026	9.55539	10.263	8.59619	10.1271
A_09_P019946	euchromatic gene	10.2424	8.34081	9.45076	8.28152	9.93983	10.0792	10.2898	10.0586	10.2112	10.182	10.3592	9.56617	9.73809	10.1889	10.0143	10.0395	9.67018	10.0642	10.0087	8.38555	10.2343
A_09_P019951	euchromatic gene	9.34158	7.81344	9.6333	8.49106	9.36234	9.50929	9.39823	9.29015	9.3835	9.18527	9.63052	8.82219	8.96541	9.18428	9.1485	9.16628	8.89426	8.99422	9.22116	7.87273	9.38677
A_09_P019956	euchromatic gene	10.3779	8.91589	9.95008	9.08442	10.1862	10.2263	10.5628	10.3239	10.2279	10.3912	10.3419	10.0071	9.9328	10.3066	10.0895	9.95312	9.77774	10.0471	10.0883	9.14675	10.4101
A_09_P019961	euchromatic gene	10.4033	9.34666	10.4712	9.81691	10.2579	10.4031	10.3888	10.3216	10.408	9.95388	10.5802	9.96516	9.80929	9.97744	9.84795	10.0696	9.94699	9.88779	10.1518	9.40897	10.4505
A_09_P019966	euchromatic gene	10.2126	8.72981	10.1515	8.98588	10.1561	10.3997	10.3607	10.216	10.3815	9.99415	10.3007	9.72487	9.54953	10.0485	10.0353	10.0935	9.54511	9.8181	9.82578	8.85555	10.1959
A_09_P019971	euchromatic gene	9.94699	8.29323	9.85725	8.58353	10.2081	10.1177	9.3593	9.83835	10.352	9.74263	10.5778	8.96887	9.12154	9.70918	9.72095	9.30797	8.85256	9.49962	9.24819	7.9518	9.53654
A_09_P019976	euchromatic gene	9.75591	7.91717	9.90564	8.75088	9.66279	9.70607	10.0183	10.0065	9.88284	9.91104	9.9026	9.28339	9.3636	9.41948	9.30604	9.46374	9.29344	9.56192	9.60373	8.13048	9.86002
A_09_P019986	euchromatic gene	9.73865	8.08619	9.85134	8.95273	9.49325	9.31092	9.89275	9.55037	9.3937	9.67167	9.49719	9.28793	9.41523	9.48169	9.37467	9.19537	9.24296	9.27202	9.55015	8.52395	9.91552
A_09_P019991	euchromatic gene	9.67451	8.70829	10.5266	9.95957	10.0386	10.0928	9.64768	9.54216	10.0255	9.4645	10.225	9.26541	9.37611	9.40664	10.0049	9.64921	9.18361	9.64605	9.53938	8.93084	9.68835
A_09_P019996	euchromatic gene	9.2454	8.37522	9.37803	8.75268	9.07203	9.06548	10.1362	9.20006	8.90702	9.09399	8.99986	9.1693	9.16545	9.15985	9.10572	9.40646	9.37027	9.2903	9.47287	8.86236	9.88931
A_09_P020001	euchromatic gene	9.93734	9.00258	10.8854	10.319	10.5374	10.5116	10.2559	10.2996	10.4982	10.2137	10.7377	9.78166	9.74261	10.0457	9.92927	10.2445	9.87677	10.0548	10.2059	9.24049	10.4694
A_09_P020006	euchromatic gene	9.16704	7.70703	9.56586	8.54398	9.28173	9.28422	9.55325	9.33077	9.41456	9.29235	9.47558	9.00513	9.11434	8.99936	8.99958	8.99445	9.04512	9.0523	9.34927	7.92245	9.69361
A_09_P020011	euchromatic gene	9.31728	7.86853	9.33618	8.28643	9.48097	9.65094	9.64598	9.39412	9.6787	9.44774	9.83748	9.30508	9.27291	9.27954	9.36099	9.08545	9.21319	9.33985	9.38448	8.14618	9.61412
A_09_P020016	euchromatic gene	9.08057	7.61151	8.69268	8.08899	8.8728	8.82569	9.2669	8.70337	8.96362	8.83723	9.01282	8.79057	8.91298	8.84287	8.72987	8.60929	8.72898	8.62859	8.99331	7.79819	9.11723
A_09_P020026	euchromatic gene	9.237	8.33079	9.41879	8.71475	9.14278	9.19809	9.80331	9.58773	9.64985	9.72545	9.71421	9.28287	9.33192	9.28926	9.40574	9.53205	9.17908	9.60032	9.56229	8.4813	9.72862
A_09_P020031	euchromatic gene	10.0592	8.66024	10.1442	9.38923	10.1121	10.1181	10.4823	10.207	10.3099	10.2821	10.3466	9.77721	9.88692	9.88028	9.9727	9.97948	9.65758	10.0888	10.161	8.94648	10.2821
A_09_P020041	euchromatic gene	9.38743	8.2012	9.53102	9.10006	9.7035	10.0865	9.63282	9.42238	9.70395	9.51703	10.1246	9.27739	9.39488	9.40101	9.44587	9.31703	9.21426	9.34437	9.62649	8.44827	9.98058
A_09_P020046	euchromatic gene	10.4983	8.55392	10.4553	9.05115	10.4513	10.4997	10.978	10.6583	10.7968	10.7389	10.8642	10.2655	10.2958	10.3919	10.5856	10.4316	10.0454	10.4756	10.5131	8.95107	10.8047
A_09_P020051	euchromatic gene	9.98623	8.24709	9.69776	8.65592	9.78613	9.84235	10.5172	9.90807	10.0745	10.0018	10.2579	9.86563	9.95596	9.96824	9.87103	9.74436	9.77226	9.85517	10.1272	8.63003	10.3695
A_09_P020056	euchromatic gene	11.2082	10.1206	10.9405	10.2868	11.0342	11.1605	11.2334	11.1003	11.1635	11.1701	11.2962	10.8162	10.9086	11.2273	11.0902	10.8864	10.733	11.0075	10.8065	10.4371	11.2258
A_09_P020061	euchromatic gene	9.88506	8.10948	10.2178	9.2951	9.65447	9.4323	10.0552	9.61902	9.61533	9.82359	9.64182	9.56238	9.65634	9.70741	9.56716	9.40456	9.48697	9.48654	9.86344	8.39982	10.0762
A_09_P020066	euchromatic gene	9.27671	7.97796	9.67592	8.94168	9.14954	9.16152	9.69288	9.17656	9.19078	9.53918	9.24292	8.9475	9.22425	9.12111	9.61359	9.03954	9.17011	9.14369	9.54098	8.25963	9.74085
A_09_P020071	euchromatic gene	9.48258	7.70555	9.1967	8.32612	9.0803	8.95568	9.68429	9.1855	9.06487	9.33924	9.15829	9.07562	9.1362	9.08687	8.89947	8.89417	9.08249	8.9972	9.31676	8.08342	9.67909
A_09_P020076	euchromatic gene	9.44938	7.97905	9.54016	8.72776	9.94149	10.1406	9.20324	9.86225	9.87073	9.4862	10.1219	8.9726	8.91112	9.60485	9.43903	9.6892	8.89233	9.48981	9.13358	7.95529	9.58924
A_09_P020081	euchromatic gene	8.85413	7.71969	8.4075	8.36583	9.14263	9.09036	9.64303	8.80594	8.9315	8.88849	8.91323	8.14622	8.59938	9.16153	8.94697	8.68216	8.9861	8.73879	9.0128	8.01393	9.24638
A_09_P020086	euchromatic gene	9.13548	7.80146	9.25834	8.28466	9.4909	9.65492	9.39178	9.34133	9.5444	9.0796	9.61467	8.78646	8.87914	9.10187	8.9875	9.11763	8.81035	8.97421	8.95163	7.71332	9.28185
A_09_P020091	euchromatic gene	9.35389	7.97831	9.64309	8.66915	9.15717	9.21026	9.46459	9.33192	9.15127	9.34244	9.31248	8.98955	9.267	9.08551	9.21243	9.19455	9.24183	9.28838	9.5179	8.24442	9.63438
A_09_P020096	euchromatic gene	9.37933	8.10329	10.0192	8.93996	9.61315	9.65545	9.84708	9.51153	9.58493	9.53199	9.7673	9.42273	9.46776	9.22572	9.32603	9.22446	9.48683	9.3109	9.83137	8.48273	10.0257
A_09_P020101	euchromatic gene	9.62909	8.09339	9.83926	8.66798	9.57332	9.61344	10.0159	9.79308	9.82403	9.77164	9.78845	9.47852	9.61328	9.35527	9.47489	9.50797	9.4351	9.56246	9.83231	8.34805	10.0559
A_09_P020106	euchromatic gene	10.3437	9.25083	10.8848	10.1234	10.3482	10.4112	10.3733	10.4873	10.2859	10.3975	10.3934	9.76168	9.93715	9.94364	10.0452	10.1335	9.76116	10.1266	10.3819	9.38027	10.504
A_09_P020111	euchromatic gene	8.75556	7.57268	9.25967	8.52711	9.09831	8.74011	8.94836	8.78915	8.99127	8.65698	9.12614	8.53049	8.75342	8.72966	8.59094	8.39052	8.52377	8.5213	8.72434	7.73854	8.93158
A_09_P020116	euchromatic gene	10.0051	8.40104	10.6064	9.26693	10.343	10.3105	10.2059	9.90082	10.3337	10.0815	10.5469	9.65065	9.78481	9.88124	9.90616	9.95159	9.65199	9.976	10.0099	8.57195	10.2163
A_09_P020121	euchromatic gene	9.45663	7.89348	8.70834	7.7868	9.36494	9.42851	9.13158	9.2702	9.5221	9.34906	9.72397	8.68088	8.82355	9.28185	9.12883	8.9085	8.62499	9.13239	8.96085	7.63749	9.24104
A_09_P020126	euchromatic gene	8.68487	7.78684	9.39648	8.68082	9.05215	9.07272	8.85509	8.84482	8.94672	8.92825	8.85114	8.26926	8.50766	8.63468	8.64655	8.91269	8.32633	8.8321	8.60802	7.63059	8.86197
A_09_P020131	euchromatic gene	8.0319	7.22653	8.56674	8.12172	8.10193	8.25142	8.44641	8.06402	8.04198	8.05803	8.19017	7.97698	8.26786	8.01704	8.06174	8.07358	8.20118	8.10712	8.2153	7.4041	8.32634
A_09_P020136	euchromatic gene	10.8733	8.86552	10.7197	9.47758	10.8498	10.7176	10.4715	10.7174	10.8376	10.4934	10.8838	9.85109	9.95843	10.2355	10.5564	10.0775	9.79842	10.1017	10.1583	8.7346	10.5658
A_09_P020141	euchromatic gene	10.0361	8.07468	10.4152	9.39034	9.81913	9.88951	10.2088	10.0627	9.9243	9.95343	9.90206	9.476	9.59917	9.6181	9.63267	9.64724	9.56665	9.81979	9.9327	8.64413	10.1977
A_09_P020146	euchromatic gene	9.52884	7.91535	9.68768	8.73295	9.34786	9.39717	9.9471	9.46401	9.60623	9.58183	9.56218	9.42224	9.59079	9.45979	9.42024	9.28539	9.42087	9.37716	9.78223	8.29888	10.0079
A_09_P020151	euchromatic gene	9.08196	7.66615	8.67565	8.13911	9.06555	8.97355	9.20628	9.15789	9.07255	9.22478	9.05373	8.65763	8.66226	9.21545	9.20531	8.90959	8.71344	9.03632	8.74818	7.62082	9.34338
A_09_P020156	euchromatic gene	9.78122	8.28628	9.87661	8.6266	9.90118	9.83868	10.0398	9.78801	10.0125	9.73246	9.98297	9.32454	9.58809	9.67438	9.91499	9.42194	9.38218	9.6628	9.63139	8.35984	9.97661
A_09_P020161	euchromatic gene	8.8956	7.57715	9.24797	8.43147	9.00115	9.01438	9.40387	8.97571	9.10502	8.93544	9.16309	8.84445	8.92569	9.00647	9.18338	8.73911	8.76254	8.83404	9.09	7.81243	9.28958
A_09_P020166	euchromatic gene	9.78085	8.39966	9.90155	8.97422	9.65465	9.79905	9.60238	9.79929	9.98119	9.82078	10.1183	9.05162	9.2249	9.46342	9.57154	9.57146	9.00013	9.59281	9.47623	8.03091	9.5619
A_09_P020171	euchromatic gene	9.13943	7.73406	9.766	8.96666	9.07765	8.88716	9.31156	9.18119	8.98068	9.06742	9.03916	8.8138	9.038	8.95888	8.95083	8.74463	8.91883	8.82204	9.2631	8.12815	9.3909
A_09_P020181	euchromatic gene	8.83822	7.75263	9.07098	8.82198	9.02197	9.03966	9.31788	8.95514	8.90266	8.85069	8.94951	8.81242	8.97173	8.86063	8.79993	8.84414	8.8427	8.95136	9.13392	7.98205	9.30424
A_09_P020186	euchromatic gene	8.94105	7.48255	8.95592	8.37023	8.74557	8.82907	9.18592	8.73608	8.8791	8.774	8.93159	8.75934	8.76262	8.78645	8.59943	8.60196	8.79734	8.68504	9.1199	7.82114	9.34441
A_09_P020191	euchromatic gene	8.8273	7.43701	8.88756	8.3196	8.71062	8.74875	9.05944	8.55959	8.83853	8.51298	8.95486	8.55584	8.70578	8.78534	8.78056	8.32935	8.68326	8.4533	8.86724	7.71364	9.02964
A_09_P020196	euchromatic gene	9.73219	7.90924	8.9734	8.41633	9.3585	9.21526	9.98587	9.51908	9.7114	9.6539	9.70946	9.10223	9.55189	9.58042	9.39386	8.94761	9.41451	9.26217	9.71932	8.33035	9.82314
A_09_P020201	euchromatic gene	8.99488	7.40915	9.07107	8.01086	9.05319	9.12553	9.32334	8.87268	9.11525	8.67928	9.23827	8.80337	8.71847	8.8486	8.88637	8.63575	8.8338	8.64508	9.05864	7.75698	9.21827
A_09_P020206	euchromatic gene	8.61996	7.55592	8.98439	7.88348	8.79265	8.82055	9.31993	8.9155	8.52043	8.41266	8.57338	8.91911	8.79082	8.4593	8.41622	8.5575	8.71583	8.30407	8.91969	8.0216	9.1283
A_09_P020211	euchromatic gene	10.7318	9.14366	10.6442	9.65627	10.7108	10.737	10.7523	10.7781	10.89	10.6698	11.0453	10.2303	10.2439	10.6251	10.5623	10.4908	10.1536	10.427	10.3583	9.27946	10.7081
A_09_P020216	euchromatic gene	10.2033	8.26958	9.78065	8.62266	9.79389	9.89363	10.2595	9.96509	10.1015	10.0637	10.225	9.62116	9.8076	9.99193	9.96736	9.81723	9.61219	9.90711	9.93799	8.40076	10.2082
A_09_P020221	euchromatic gene	10.8885	9.88204	10.4362	9.91407	10.5184	10.4654	10.9706	10.6987	10.5548	10.6168	10.7199	10.6665	10.7605	10.8129	10.7065	10.5464	10.5648	10.5512	10.4603	10.2651	11.0055
A_09_P020226	euchromatic gene	10.5741	9.23178	11.1207	10.6421	10.7626	10.8869	10.847	10.81	10.9283	10.7851	10.9737	10.4201	10.4297	10.5777	10.6144	10.7545	10.3346	10.7024	10.5752	9.78539	10.8226
A_09_P020231	euchromatic gene	9.08716	7.79059	9.17031	8.41968	9.09527	9.1233	9.48302	8.93526	9.31574	8.92969	9.40309	8.93595	9.03636	8.95975	8.91192	8.65948	9.12396	8.8812	9.17482	8.06175	9.36414
A_09_P020236	euchromatic gene	9.00713	7.58232	9.58358	8.87128	8.95811	9.1769	9.41121	8.8245	9.11327	8.74651	9.27398	8.91277	8.86139	8.84704	8.73325	8.53885	8.82543	8.65206	9.11422	7.9267	9.51706
A_09_P020241	euchromatic gene	10.1555	8.42183	8.78276	8.1619	10.2072	10.2849	9.66145	10.1253	10.261	10.1392	10.4986	9.04656	9.12404	10.0301	9.95651	9.7232	9.03866	9.93832	9.44848	7.90717	9.60647
A_09_P020246	euchromatic gene	10.1477	8.36939	9.93443	8.92916	9.89054	9.90893	10.1595	10.1419	10.0654	10.044	10.2423	9.53054	9.58814	9.85677	9.57753	9.54538	9.52882	9.66878	9.90144	8.4053	10.0501
A_09_P020251	euchromatic gene	8.82935	7.56155	9.23265	8.53238	8.84324	8.86797	9.13259	8.93795	8.93242	8.76442	8.99286	8.70538	8.88919	8.84555	8.77552	8.56764	8.83128	8.6903	8.99075	7.87346	9.10535
A_09_P020256	euchromatic gene	9.4455	7.97307	9.67997	8.52484	9.49334	9.65258	9.77349	9.48718	9.70204	9.23938	9.97975	9.05028	9.40455	9.36976	9.32076	9.24314	9.24165	9.16518	9.62594	8.21677	9.82399
A_09_P020261	euchromatic gene	9.24772	7.84784	9.75587	8.80059	9.27252	9.41796	9.62506	9.30191	9.27671	9.09316	9.57023	8.9952	9.16373	9.04679	8.92284	8.99896	9.22941	9.00308	9.35239	8.06214	9.7257
A_09_P020266	euchromatic gene	8.64094	7.52225	9.21258	8.3333	8.74226	8.77029	8.96157	8.7773	8.87487	8.72811	8.93985	8.60125	8.76273	8.63399	8.65942	8.71721	8.61612	8.67844	8.84985	7.70494	9.00049
A_09_P020271	euchromatic gene	8.52596	7.52585	9.24832	8.42441	8.62217	8.72051	9.20342	8.7591	8.78757	8.59763	8.83027	8.93722	8.79102	8.67818	8.45072	8.56964	8.78072	8.48185	9.15079	7.88422	9.225
A_09_P020276	euchromatic gene	8.74762	7.47204	9.39302	8.53308	8.7585	8.69274	9.00957	8.65714	8.61645	8.47785	8.73357	8.61906	8.74799	8.63318	8.37865	8.48383	8.65748	8.53243	9.04121	8.19591	9.05412
A_09_P020281	euchromatic gene	10.4762	8.62382	10.1346	9.20433	10.2567	10.2933	10.1113	10.3611	10.3609	10.4591	10.4519	9.5929	9.57357	10.0642	10.0527	10.0776	9.416	10.1485	9.74893	8.45505	10.0349
A_09_P020286	euchromatic gene	9.08349	7.56922	9.50678	8.79719	9.21245	9.27111	9.35373	8.96859	9.11813	8.84029	9.22136	8.80699	8.93577	8.97784	8.71739	8.82268	8.93055	8.84438	9.14307	7.93853	9.34834
A_09_P020296	euchromatic gene	9.15664	7.82147	9.80517	8.79587	9.23238	9.25893	9.37184	9.14677	8.96038	9.12858	9.13162	8.90607	8.9971	8.86607	8.8158	8.9284	9.01681	9.02728	9.55971	8.22506	9.68533
A_09_P020301	euchromatic gene	9.82909	8.35011	10.506	9.60654	10.0683	10.2387	10.0051	9.79576	10.0735	9.73141	10.3012	9.3988	9.42084	9.66578	9.75522	9.50011	9.35505	9.66836	9.75416	8.8468	10.1973
A_09_P020306	euchromatic gene	11.7973	11.0862	12.0905	11.833	11.8357	11.9755	11.8918	12.0384	11.9456	12.0342	12.066	11.6455	11.6268	11.7897	12.0382	12.2797	11.5411	11.9307	11.7881	11.3964	12.1311
A_09_P020311	euchromatic gene	10.5187	9.28586	10.7283	10.2622	10.6615	10.7619	10.8464	10.51	10.7968	10.7129	10.7652	10.2027	10.2569	10.5428	10.5422	10.6293	10.0776	10.3493	10.465	9.58544	10.6198
A_09_P020316	euchromatic gene	12.2074	11.5701	12.3427	12.2583	12.5399	12.4701	11.7484	12.3166	12.2936	12.3426	12.5	11.3765	11.2847	12.2679	12.1455	12.1947	11.3763	12.0965	11.295	11.2588	11.9514
A_09_P020321	euchromatic gene	9.82343	8.08839	10.2403	9.04426	9.97501	10.0193	10.4762	10.0538	10.0853	9.93224	10.1013	9.6031	9.74539	9.76826	9.71234	9.77219	9.5868	9.73986	9.90673	8.46839	10.069
A_09_P020326	euchromatic gene	9.63829	8.04645	9.6902	8.84836	9.31045	9.16998	10.0741	9.53145	9.28326	9.68949	9.23783	9.42439	9.56867	9.4688	9.30269	9.24893	9.46138	9.34893	9.80791	8.37911	10.024
A_09_P020331	euchromatic gene	9.64223	8.50325	10.5123	9.4782	10.1593	10.2334	10.4717	10.7057	9.91672	9.90563	10.1581	9.59765	10.0259	9.47868	9.9903	9.50898	9.59955	9.58541	10.1447	9.98743	10.3356
A_09_P020336	euchromatic gene	9.79038	8.66152	10.6035	10.4703	10.3033	10.5844	9.99382	10.259	10.4776	9.93333	10.6192	9.48534	9.31359	9.79746	9.67392	10.1942	9.33882	9.99147	9.67991	8.77005	10.0034
A_09_P020341	euchromatic gene	9.70931	8.05997	9.88885	8.90913	9.67971	9.40958	9.76842	9.5088	9.49886	9.42776	9.50419	9.28109	9.3568	9.26311	9.37398	9.00208	9.31119	9.21554	9.56332	8.26354	10.0152
A_09_P020346	euchromatic gene	13.1526	12.8497	13.0052	13.128	13.1745	13.3689	13.5449	13.2046	13.3102	13.2288	13.4251	13.265	13.2705	13.077	13.1092	13.5796	13.3948	13.3236	13.3886	13.4399	13.9221
A_09_P020351	euchromatic gene	8.60652	7.58881	9.05102	8.42158	8.95466	9.13845	8.86531	8.92644	9.0415	8.87964	9.23191	8.48856	8.7618	8.64484	8.4256	8.72785	8.86281	8.84129	9.19972	7.72164	9.09253
A_09_P020356	euchromatic gene	9.3017	7.74717	9.56208	8.75113	9.11767	9.01989	9.85957	9.4381	9.12264	9.52613	9.07671	9.31866	9.40167	9.28507	9.45271	9.21895	9.22436	9.30467	9.68384	8.49234	9.86311
A_09_P020361	euchromatic gene	9.64936	8.09561	9.97494	9.06597	9.96883	10.0865	10.1528	9.76628	9.99854	9.86959	10.1292	9.44193	9.59098	9.63417	9.54339	9.69873	9.46321	9.5584	9.82169	8.33627	10.0379
A_09_P020366	euchromatic gene	9.60076	8.03217	9.97192	8.77102	9.67394	9.70658	9.48229	9.65294	9.692	9.5096	9.68545	9.12831	9.18363	9.40721	9.26451	9.36687	9.15138	9.29289	9.41328	8.04983	9.77772
A_09_P020371	euchromatic gene	8.42054	7.32717	8.92508	8.30804	8.16564	8.10793	8.47724	8.15278	8.2769	8.0648	8.17509	8.05834	8.37021	8.18763	8.12623	8.04504	8.28854	8.09387	8.47094	7.49466	8.63764
A_09_P020376	euchromatic gene	9.31763	7.76707	9.13963	8.48715	8.99901	8.87923	9.30451	8.90788	8.96487	9.06155	8.9596	8.92202	9.05167	8.94624	8.79891	8.85931	8.94447	8.88686	9.25116	7.99178	9.38133
A_09_P020381	euchromatic gene	9.1262	7.69382	9.28804	8.68877	9.10567	8.88682	9.28684	9.17985	8.91409	9.2887	8.95031	8.79209	8.99682	9.05093	8.99996	8.85484	8.81193	9.01833	9.03402	8.24108	9.3551
A_09_P020386	euchromatic gene	9.30354	7.72314	9.50856	8.48428	9.39691	9.28973	9.73388	9.34455	9.43434	9.15202	9.43423	9.04844	9.17649	9.02754	9.08158	8.79332	9.04588	8.99332	9.28486	8.25298	9.57671
A_09_P020396	euchromatic gene	9.90626	8.50543	10.4666	9.45904	10.1299	10.4399	10.2436	10.0937	10.3745	9.89494	10.4602	9.64453	9.66317	9.98181	9.79425	10.0396	9.65944	9.76749	9.91912	9.02192	10.2151
A_09_P020401	euchromatic gene	8.36051	7.30149	8.69223	8.03097	8.27885	8.27072	8.45031	8.21292	8.43452	8.30977	8.11821	8.10047	8.37633	8.20105	8.01437	8.12933	8.32501	8.25706	8.48883	7.51229	8.64474
A_09_P020406	euchromatic gene	9.48208	8.05471	9.83852	8.90741	9.25419	9.05197	9.66117	9.42593	9.22812	9.36994	9.29899	9.04876	9.19513	9.08768	9.40945	8.96789	9.22808	9.17973	9.60232	8.49786	9.71604
A_09_P020411	euchromatic gene	10.96	8.94574	10.7985	9.33502	10.9844	10.8769	10.5872	10.687	10.8904	10.748	11.2215	10.1313	10.1137	10.5965	10.6654	10.3535	9.94688	10.4101	10.2896	8.75539	10.6428
A_09_P020416	euchromatic gene	8.99724	7.55899	9.15455	8.17751	9.14259	9.19796	9.50185	9.17945	9.15775	9.09749	9.22789	8.92091	8.91983	8.93944	8.90371	8.71869	8.94191	9.04284	9.17454	7.89021	9.33684
A_09_P020421	euchromatic gene	9.11092	7.71514	9.47093	8.62199	9.27235	9.44109	9.53316	9.19033	9.35541	9.10778	9.44846	8.9991	8.93609	9.04937	9.06838	9.16233	9.05206	9.27375	9.30262	8.00803	9.27892
A_09_P020426	euchromatic gene	9.66369	7.99044	9.67876	8.83995	9.58769	9.59121	9.85745	9.55861	9.58435	9.52343	9.62802	9.26314	9.27534	9.25984	9.18865	9.16942	9.16956	9.25433	9.45348	8.34437	9.75335
A_09_P020431	euchromatic gene	10.2969	9.06536	10.7772	10.1472	10.3908	10.4446	10.6362	10.4391	10.3266	10.4007	10.4274	10.2268	10.2645	10.115	10.1073	10.245	10.1821	10.2402	10.5923	9.52411	10.6343
A_09_P020436	euchromatic gene	8.77097	7.47216	8.72701	8.1807	8.94032	9.12883	9.2569	8.43174	8.89621	8.55157	8.82648	8.37287	8.4161	8.70519	8.59381	8.436	8.43501	8.61244	8.93426	7.76255	8.87458
A_09_P020441	euchromatic gene	9.00872	7.52332	9.32065	8.43985	8.73899	8.95098	9.35941	8.7053	9.15579	8.81173	9.13285	8.80314	8.75521	8.82244	8.74183	8.46391	8.74708	8.6877	9.05131	7.79056	9.14367
A_09_P020446	euchromatic gene	10.1511	8.78233	9.91492	9.27151	9.77646	9.73968	9.75265	9.72671	9.79069	9.72668	9.72237	9.29891	9.24571	9.85579	9.98278	9.59295	9.22642	9.65475	9.44094	9.06424	9.86426
A_09_P020451	euchromatic gene	8.3465	7.34565	9.15646	8.63201	8.56938	8.6694	8.82886	8.49982	8.46657	8.4548	8.49971	8.27201	8.45981	8.35376	8.11224	8.43925	8.45212	8.38977	8.70219	7.50341	8.79355
A_09_P020456	euchromatic gene	8.37776	7.54239	8.49687	8.15102	8.26482	8.43589	8.75387	8.5144	8.37007	8.2772	8.6036	8.47768	8.57608	8.59505	8.44362	8.37628	8.54861	8.32027	8.62677	7.73835	8.68684
A_09_P020461	euchromatic gene	9.22832	7.95806	9.40367	9.29638	9.87467	9.66633	9.61086	9.3072	9.3596	9.44712	9.31353	9.06773	9.25052	9.40353	9.29749	9.31329	9.0818	9.24941	9.2994	8.50824	9.73271
A_09_P020466	euchromatic gene	9.77522	8.36407	10.2882	9.29529	9.98324	10.0759	9.85934	9.81314	10.0038	9.76428	10.0145	9.39219	9.44214	9.57182	9.5799	9.52332	9.306	9.58461	9.61885	8.56886	9.90088
A_09_P020471	euchromatic gene	9.66414	8.02487	10.1437	8.93662	9.71022	9.92642	10.0554	9.63249	9.95524	9.65251	10.1138	9.7179	9.62431	9.58853	9.70017	9.27237	9.49193	9.53444	9.67553	8.41375	10.0123
A_09_P020476	euchromatic gene	9.65217	8.50269	10.3704	9.39485	9.98141	10.2294	9.95747	9.83339	10.0071	9.81764	10.5445	9.4797	9.31498	9.49076	9.3951	9.32802	9.47688	9.51503	9.71818	8.80524	9.80656
A_09_P020481	euchromatic gene	10.073	8.3906	10.6682	9.42918	10.1892	10.1503	9.84049	10.1679	10.1845	10.1744	10.2292	9.51752	9.43665	9.83353	9.874	9.92242	9.34407	9.9972	9.91597	8.31587	10.0079
A_09_P020486	euchromatic gene	8.36907	7.25779	8.62831	7.99279	8.55021	8.44102	8.78217	8.63894	8.57287	8.53404	8.61965	8.0462	8.2108	8.55882	8.4594	8.36186	8.19429	8.35574	8.41559	7.29536	8.60404
A_09_P020491	euchromatic gene	10.3455	9.73378	9.8978	9.30314	9.66313	9.49827	11.4946	10.9915	9.59167	10.6374	9.405	10.2376	10.356	9.98548	10.1094	10.1436	10.0956	10.3347	10.3691	10.2679	10.8696
A_09_P020496	euchromatic gene	9.53912	7.95144	10.3391	9.17412	9.6642	9.78839	9.9499	9.71354	9.82983	9.5589	9.86095	9.43366	9.45595	9.48577	9.49442	9.23343	9.42007	9.42944	10.0717	8.39899	9.91701
A_09_P020501	euchromatic gene	9.71485	8.11059	9.64664	8.81285	9.41764	9.34987	9.98102	9.68411	9.55512	9.79609	9.53567	9.50572	9.66991	9.53728	9.66993	9.53908	9.58013	9.59606	9.92743	8.57839	10.1048
A_09_P020506	euchromatic gene	10.5467	8.49179	10.5047	9.24999	10.647	10.6103	10.3382	10.3387	10.6756	10.4579	10.7757	9.75069	9.83457	10.4198	10.2447	10.2606	9.61959	10.1593	10.0394	8.48584	10.2518
A_09_P020511	euchromatic gene	10.0824	8.27139	9.83391	8.77042	9.66625	9.66777	10.3873	10.1568	9.83545	10.0521	9.89329	9.83709	9.84722	10.0184	10.0652	9.74981	9.77681	9.9107	10.1729	8.55502	10.446
A_09_P020516	euchromatic gene	10.2157	8.41395	11.2385	9.6291	10.436	10.6291	10.4975	10.2318	10.6124	10.38	10.7004	9.9532	9.97968	10.1051	10.1821	10.117	9.76384	10.0963	10.2161	8.6738	10.5306
A_09_P020521	euchromatic gene	7.99646	7.09585	8.68421	8.30029	8.23514	8.38013	8.50593	7.94214	8.35208	8.11498	8.32982	7.88434	8.12493	8.1128	8.08959	8.09466	8.1837	8.16466	8.20194	7.34616	8.13271
A_09_P020526	euchromatic gene	9.77081	8.23184	10.592	9.25419	9.82085	9.93552	9.76065	9.88534	9.89802	9.69418	10.0069	9.78007	9.63307	9.63816	9.6901	9.48724	9.69867	9.40352	9.98566	8.66649	10.0373
A_09_P020531	euchromatic gene	8.95498	7.59879	9.09002	8.24811	8.91753	8.73208	9.32718	8.79827	8.95182	8.86689	9.09364	8.78498	8.98483	8.83463	9.12728	8.67839	8.82999	8.73125	8.96893	7.97053	9.2079
A_09_P020536	euchromatic gene	9.50386	8.22631	9.5333	8.59446	9.40312	9.67105	9.6416	9.60918	9.75876	9.49807	10.1263	9.03095	9.12902	9.47611	9.26992	9.48151	9.16997	9.41252	9.40424	7.99644	9.81177
A_09_P020541	euchromatic gene	10.9138	10.4081	11.0436	11.0956	11.2201	11.2289	10.9371	11.1917	11.2538	11.0846	11.3437	10.2077	10.1106	10.8324	10.6362	10.9234	10.2232	10.7986	10.5186	10.0362	11.1237
A_09_P020546	euchromatic gene	8.7448	7.70502	9.03108	8.36539	8.56882	8.57866	9.06446	8.69163	8.73749	8.68676	8.81969	8.55783	8.8788	8.63617	8.69073	8.65818	8.69913	8.70683	8.97988	7.85081	9.09203
A_09_P020551	euchromatic gene	9.41603	7.86033	9.91723	9.06027	9.52185	9.41162	9.91462	9.503	9.63866	9.62705	9.64588	9.34895	9.62633	9.52265	9.68994	9.28616	9.44594	9.39831	9.66297	8.39644	9.89593
A_09_P020556	euchromatic gene	9.25165	7.79701	9.39911	8.38633	9.06169	9.16418	9.45071	9.03941	9.19846	9.02779	9.04334	8.96561	9.22418	8.94686	9.03656	8.93773	9.09001	8.94621	9.43314	8.09961	9.44383
A_09_P020561	euchromatic gene	9.88342	8.01794	9.15021	8.36879	9.47096	9.36672	9.42492	9.6615	9.51048	9.61745	9.65468	8.75584	8.83802	9.42063	9.37953	9.27775	8.82867	9.37865	9.10788	7.80093	9.43735
A_09_P020566	euchromatic gene	11.5054	11.1737	12.0421	12.4863	12.7566	12.8862	11.8999	12.4594	12.4969	12.288	12.5873	11.1167	11.1034	12.2003	12.1991	12.8603	11.2944	12.4065	10.9094	11.136	11.6094
A_09_P020571	euchromatic gene	10.3585	8.80387	10.3456	9.31794	10.433	10.4666	10.4319	10.4373	10.3929	10.3314	10.5385	9.72401	9.80034	10.0719	10.0776	9.88196	9.65827	10.0613	9.87821	8.67422	10.2973
A_09_P020576	euchromatic gene	10.3864	8.69136	10.3251	9.35425	10.0632	9.99415	10.5506	10.3703	10.151	10.2926	10.1732	10.0853	10.0776	10.0595	10.1728	9.90124	9.93156	10.0341	10.3068	9.07015	10.5622
A_09_P020581	euchromatic gene	8.32568	7.30731	8.36505	7.84801	8.3112	8.30664	8.46504	7.92592	8.30614	8.07216	8.36725	7.82092	8.15053	8.28472	8.87988	8.06291	8.14053	8.10255	8.23454	7.21446	8.31887
A_09_P020586	euchromatic gene	9.87668	8.5728	10.2607	9.34853	10.0682	10.0114	10.1054	9.78143	10.0854	9.78794	10.349	9.59366	9.65506	9.66775	9.71359	9.61484	9.49279	9.71815	9.82239	8.87632	10.1739
A_09_P020591	euchromatic gene	9.84431	8.22647	10.0498	8.67817	9.94137	10.0809	9.95348	9.70554	10.2698	9.69488	10.58	9.64713	9.72368	9.39964	9.5201	9.47298	9.57874	9.53642	9.88392	8.62511	10.3374
A_09_P020596	euchromatic gene	9.61085	7.93405	9.35087	8.31295	9.52117	9.40363	9.9496	9.63419	9.58632	9.87731	9.72704	9.43601	9.41642	9.61756	9.64702	9.49952	9.34864	9.51577	9.68268	8.28911	9.90439
A_09_P020601	euchromatic gene	9.41343	8.87421	9.26331	9.35909	10.099	9.97005	9.62733	9.67078	10.1766	9.66279	10.3304	9.35118	9.29816	9.80733	9.8481	9.67094	9.12433	9.6664	9.06451	9.10237	9.4227
A_09_P020606	euchromatic gene	8.89293	7.80128	9.22341	8.51528	8.85801	8.67537	9.08407	8.8842	8.74172	9.07133	8.76679	8.62382	8.8427	8.62828	8.61141	8.58439	8.83445	8.81089	8.9974	7.98531	9.14856
A_09_P020611	euchromatic gene	8.52698	7.62736	9.035	8.26758	8.68092	8.74802	9.11353	8.7096	8.63234	8.72552	8.84963	8.56211	8.73378	8.62564	8.59439	8.87211	8.56504	8.82229	8.59685	8.1662	8.99191
A_09_P020616	euchromatic gene	9.55744	7.9725	9.40449	8.44896	9.33553	9.21281	9.57382	9.36754	9.36875	9.50454	9.51945	8.93945	9.19501	9.23118	9.21087	9.16464	9.06856	9.18921	9.31329	8.10838	9.62335
A_09_P020621	euchromatic gene	10.4905	9.74514	10.8015	10.7625	10.9309	11.0024	10.8656	10.9599	10.9748	11.0904	11.1308	10.2765	10.3078	10.7502	10.8513	11.316	10.2362	11.0507	10.3945	10.0025	10.8767
A_09_P020626	euchromatic gene	8.57567	7.41812	8.74674	8.2174	8.73438	8.73314	9.08951	8.48489	8.83899	8.65035	8.81073	8.51925	8.58086	8.60354	8.52777	8.49727	8.61248	8.43699	8.77473	7.77266	8.87008
A_09_P020631	euchromatic gene	9.63474	8.2705	9.53163	9.13085	9.44708	9.43418	9.93382	9.64746	9.26765	9.5963	9.29885	9.20012	9.42608	9.42003	9.41504	9.52257	9.34285	9.54664	9.50209	8.74305	9.80828
A_09_P020636	euchromatic gene	9.21218	7.59208	9.09265	7.99697	8.95393	9.04454	9.22132	9.27897	9.47969	9.43684	9.57813	8.68691	8.74002	8.91582	8.81774	9.15546	8.65782	9.09697	8.86251	7.49709	9.20289
A_09_P020641	euchromatic gene	12.179	11.8141	12.4224	12.3051	12.6124	12.6769	11.7145	12.5643	12.6127	12.2272	12.768	11.7141	11.5142	12.3655	12.2901	12.378	11.5815	12.2515	11.4969	11.4995	11.9701
A_09_P020646	euchromatic gene	9.43969	7.77095	9.72331	8.94987	9.30683	9.34903	9.61727	9.05902	9.42508	9.33086	9.3816	9.02332	9.17408	9.18623	8.90328	9.01923	9.07382	9.0415	9.38652	8.03876	9.48758
A_09_P020651	euchromatic gene	10.1668	9.62529	10.6376	10.7477	10.6578	10.3842	10.4202	10.4463	10.4895	10.5069	10.5624	9.95688	10.0188	10.2913	10.2542	10.4331	10.0329	10.2811	10.0359	9.89188	10.4283
A_09_P020656	euchromatic gene	9.01674	7.6081	9.2081	8.23218	9.00966	9.12293	9.35689	8.96831	9.21356	8.81791	9.40519	8.87028	9.04372	8.97123	8.84327	8.80335	9.03193	8.82895	9.26607	8.00634	9.33831
A_09_P020661	euchromatic gene	9.28163	7.88403	9.97703	8.92827	9.32731	9.44686	9.67586	9.10032	9.47677	9.29624	9.66013	9.61123	9.1965	9.25361	9.17682	9.14677	9.27512	9.14657	9.73234	8.30514	9.65854
A_09_P020666	euchromatic gene	8.83583	7.53816	9.46288	8.50316	8.84474	8.78814	9.15598	8.56039	8.86481	8.67918	9.08246	8.68502	9.01134	8.68973	8.70133	8.46533	8.82338	8.53088	8.99265	7.93326	9.39933
A_09_P020671	euchromatic gene	8.79875	7.63689	8.70937	8.26104	8.54502	8.57005	8.88079	8.64815	8.66247	8.40083	8.75398	8.67122	8.76043	8.68665	8.53091	8.53266	8.65497	8.45779	8.95921	7.84376	8.99187
A_09_P020676	euchromatic gene	9.57727	8.11062	10.0996	9.01582	9.78439	9.78074	9.99157	9.57332	9.82046	9.63674	9.98679	9.36407	9.55348	9.50952	9.54159	9.27654	9.44968	9.35144	9.71249	8.63361	10.1796
A_09_P020681	euchromatic gene	9.7443	8.15578	9.91446	8.86743	9.89474	9.9411	10.1327	9.64364	10.069	9.96222	9.86269	9.65581	9.69292	9.61563	9.70576	9.74774	9.34663	9.50392	9.71934	8.44967	10.1747
A_09_P020686	euchromatic gene	8.1926	7.4022	8.50568	7.88186	8.2556	8.43685	8.68531	8.51802	8.48616	8.19931	8.52014	8.48432	8.49631	8.41453	8.3166	8.28996	8.38318	8.22689	8.62337	7.64388	8.67867
A_09_P020691	euchromatic gene	9.33434	7.94887	9.34362	8.69685	9.46025	9.26146	9.71126	9.1296	9.38979	9.42341	9.42093	8.97517	9.21842	9.22749	9.192	9.13571	9.04392	9.27593	9.50261	8.31948	9.69351
A_09_P020696	euchromatic gene	8.8991	7.73675	9.25072	8.10665	9.09025	9.16305	9.489	9.0943	9.10762	9.1246	9.03637	8.89061	9.07289	8.60347	8.60424	8.84308	8.82998	8.98133	9.33463	7.85165	9.52004
A_09_P020701	euchromatic gene	9.20964	8.00045	9.49983	8.57593	9.24182	9.55081	9.55279	9.33144	9.34773	9.15465	9.54586	9.26216	9.2	9.14824	9.05937	9.186	9.15317	9.05636	9.4877	8.17411	9.73482
A_09_P020706	euchromatic gene	9.13817	7.88312	9.99935	9.02032	9.31123	9.37252	9.63137	9.13417	9.38793	9.07775	9.35206	9.1803	9.06371	8.98116	8.98928	8.81188	9.03104	8.90863	9.60945	8.23181	9.51811
A_09_P020711	euchromatic gene	9.84078	8.28232	9.54866	8.74905	9.72842	9.4834	9.93486	9.71093	9.57942	9.63407	9.6428	9.56683	9.63467	9.46265	9.55555	9.22104	9.59602	9.29546	9.88275	8.74492	10.0873
A_09_P020716	euchromatic gene	8.65237	7.52901	8.89059	8.05693	8.38036	8.4751	9.00705	8.56362	8.65039	8.53382	8.85596	8.51447	8.65972	8.41576	8.5725	8.61091	8.69726	8.64865	8.67899	7.8409	8.98052
A_09_P020721	euchromatic gene	9.48496	8.5354	9.2919	8.24641	9.0107	9.01751	10.2421	9.44273	9.00856	9.07477	9.164	9.45227	9.60002	8.98254	8.93562	9.14107	9.57632	9.12563	9.8451	9.59602	10.393
A_09_P020731	euchromatic gene	9.38123	7.80758	9.5395	8.68339	9.22459	9.10155	9.91058	9.34416	9.23025	9.35684	9.34274	9.15027	9.22152	9.1133	9.12733	9.03607	9.15506	9.12885	9.44101	8.11703	9.6771
A_09_P020736	euchromatic gene	9.33105	7.9772	9.46815	8.72884	9.29636	9.24568	9.79443	9.48212	9.33135	9.26928	9.35155	9.25547	9.3176	9.26529	9.00189	8.97891	9.33822	9.09416	9.6218	8.35014	9.66856
A_09_P020741	euchromatic gene	9.07174	7.75345	9.40847	8.30981	9.16549	9.16974	9.43234	8.88191	9.27214	9.07096	9.54679	8.81626	9.01677	8.94236	9.03302	8.89985	9.02381	8.95192	9.30253	7.94765	9.3143
A_09_P020746	euchromatic gene	9.49073	8.39828	9.39779	8.77223	9.34372	9.27964	9.84791	9.48484	9.54874	9.36781	9.5763	9.26524	9.35042	9.27765	9.3683	9.23377	9.23909	9.27482	9.52661	8.47433	9.7429
A_09_P020751	euchromatic gene	9.27742	8.01094	9.14144	8.43508	9.35963	9.39029	9.66482	9.18444	9.44601	9.46024	9.36079	8.96282	9.09326	9.09809	9.06664	8.94829	9.0574	9.19477	9.40614	8.13524	9.65253
A_09_P020756	euchromatic gene	9.60027	8.03098	9.42391	8.4659	9.36312	9.34704	10.0816	9.65605	9.55467	9.73638	9.55441	9.4005	9.56765	9.59671	9.72694	9.32889	9.49999	9.4566	9.72259	8.5057	10.0084
A_09_P020761	euchromatic gene	9.96712	8.18238	9.82824	8.76681	9.70779	9.65137	10.1123	9.75379	9.76344	9.89974	9.95111	9.52276	9.7095	9.6636	9.60701	9.34073	9.61191	9.51581	9.92488	8.64639	10.2025
A_09_P020766	euchromatic gene	9.4912	7.7292	9.6454	8.83959	9.16087	9.0334	9.71457	9.21013	9.15963	9.23326	9.20776	9.01822	9.20176	8.90319	8.89539	8.92247	9.04316	9.02036	9.39982	8.14453	9.60671
A_09_P020771	euchromatic gene	9.12167	7.55104	8.98	8.289	8.82351	8.68864	9.23435	8.92714	8.90519	8.93489	8.68858	8.66957	8.79468	8.62251	8.57396	8.53766	8.80437	8.73909	9.17421	7.85368	9.20038
A_09_P020776	euchromatic gene	8.99271	7.63563	9.10832	8.69521	8.93917	9.05849	9.28226	8.60321	9.08991	8.93541	9.31243	8.74861	8.88336	8.81251	8.66226	8.64688	9.00821	8.90663	9.26164	7.88404	9.3782
A_09_P020781	euchromatic gene	9.37465	7.77843	9.12737	8.44419	9.11253	8.85151	9.68729	9.15089	8.9794	9.30666	8.91219	9.00378	9.02586	9.06917	8.86915	8.87894	9.01269	8.91697	9.3109	8.07307	9.62868
A_09_P020786	euchromatic gene	8.70089	7.61298	9.01373	8.32816	8.58335	8.56922	9.09775	8.7126	8.59155	8.53409	8.80268	8.83387	8.77715	8.69108	8.46795	8.55637	8.68477	8.48086	8.98602	7.72666	9.0953
A_09_P020791	euchromatic gene	9.62591	8.68608	9.55933	9.00364	9.77354	9.84179	9.59295	9.43609	10.0077	9.85133	9.67246	9.07347	9.06849	9.73721	9.62749	9.21199	8.98731	9.72862	9.57916	8.51111	9.54966
A_09_P020796	euchromatic gene	9.28962	7.94471	9.99491	8.79005	9.46413	9.31074	9.28718	9.12902	9.47452	9.31558	9.47223	8.80648	8.89469	9.01513	9.15449	8.90544	8.79514	9.20157	9.07782	7.92109	9.36397
A_09_P020801	euchromatic gene	9.21462	7.73864	9.8386	8.81881	9.30052	9.3668	9.63899	9.31461	9.38548	9.06821	9.56464	9.20139	9.19101	9.22115	9.04905	8.97356	9.11372	9.02685	9.50244	8.16112	9.60221
A_09_P020806	euchromatic gene	9.58643	7.96798	9.57432	8.42387	9.43166	9.26724	9.64765	9.31223	9.49615	9.3215	9.67746	9.16336	9.30643	9.06405	9.18318	8.93529	9.28492	9.16374	9.50149	8.16695	9.73452
A_09_P020811	euchromatic gene	9.80598	8.11775	9.59012	8.55274	9.67297	9.7682	10.0939	9.83092	9.86306	9.72411	9.94182	9.4598	9.45282	9.76152	9.63351	9.41904	9.45267	9.51122	9.84463	8.24225	9.95507
A_09_P020816	euchromatic gene	10.1902	8.509	10.276	8.77392	10.1013	10.3653	10.1695	10.1432	10.2998	10.1795	10.4178	9.8885	9.57178	9.83726	9.90461	9.70798	9.65255	9.82955	10.026	8.47405	10.1211
A_09_P020821	euchromatic gene	8.90366	7.49754	8.56059	8.11531	8.66431	8.45133	9.26764	8.83851	8.63824	8.40867	8.54862	8.67816	8.77875	8.78847	8.79887	8.64992	8.76915	8.77104	8.65394	7.91335	9.16632
A_09_P020826	euchromatic gene	9.80831	8.14247	9.3583	8.47054	9.47001	9.47375	10.0315	9.63885	9.61929	9.58951	9.80294	9.50513	9.72275	9.54738	9.46209	9.24968	9.53763	9.37229	9.81347	8.38348	10.0607
A_09_P020831	euchromatic gene	9.65472	8.0832	9.41455	8.57487	9.63027	9.33238	10.2981	9.72132	9.48545	9.74052	9.65124	9.41062	9.57142	9.58244	9.75579	9.55996	9.37211	9.63652	9.73678	8.52711	10.0548
A_09_P020836	euchromatic gene	9.60841	8.13628	9.76923	8.54229	9.72743	9.66898	9.77036	9.53899	9.67695	9.72101	9.90665	9.16597	9.30594	9.50419	9.56592	9.33853	9.2832	9.5189	9.63016	8.21691	9.826
A_09_P020841	euchromatic gene	8.24067	7.1958	7.83763	7.6006	7.8687	7.72319	8.30895	8.31746	8.00172	8.01242	8.00469	7.86057	8.26266	8.0442	7.96456	8.09835	8.26677	8.41039	8.27865	7.64725	8.14806
A_09_P020846	euchromatic gene	9.81364	8.19678	10.1327	8.98926	9.81805	9.62029	10.1526	9.68019	9.74737	9.67823	9.84426	9.56708	9.72177	9.46967	9.52526	9.4568	9.57567	9.46413	10.0316	8.47372	10.257
A_09_P020851	euchromatic gene	9.87944	7.99291	9.66381	8.7897	9.60391	9.87494	10.2248	9.71723	9.98388	9.79184	10.1324	9.47716	9.63587	9.51607	9.52455	9.5329	9.51366	9.59715	9.87102	8.31623	9.9454
A_09_P020856	euchromatic gene	10.9797	10.5024	10.8828	10.8562	11.1635	10.9189	10.8433	11.1894	11.0101	11.343	11.0841	10.5327	10.5187	11.2203	11.2598	11.2586	10.4035	11.3111	10.4242	10.4348	10.9661
A_09_P020861	euchromatic gene	9.35336	7.79228	9.48912	8.73913	9.19691	8.97105	9.60122	9.31601	9.14263	9.19261	9.20449	8.89073	9.25364	8.98542	9.00303	8.80589	9.04852	9.07433	9.35942	8.25214	9.38166
A_09_P020866	euchromatic gene	10.5082	8.56071	10.4609	9.43688	10.2655	10.24	10.6409	10.2952	10.4335	10.4538	10.4923	10.2006	10.2722	10.3245	10.2555	10.1186	10.0726	10.2383	10.4513	8.93925	10.7135
A_09_P020871	euchromatic gene	9.03899	7.59993	9.1443	8.42332	8.76646	8.87565	9.30524	8.82128	8.95559	8.86284	9.10882	8.76708	8.89693	8.99144	8.81989	8.63372	8.87697	8.65462	9.01777	7.93497	9.27121
A_09_P020876	euchromatic gene	9.31096	7.73997	10.0003	9.07793	9.13894	9.1829	9.26565	9.12098	9.24547	8.98826	9.16795	8.78796	8.97572	8.86962	8.93444	8.73009	8.79735	8.89408	9.08848	8.01776	9.15369
A_09_P020881	euchromatic gene	10.1349	9.20025	10.4788	10.1591	10.4212	10.4757	10.3386	10.3915	10.6026	10.1855	10.8585	10.0383	9.94271	10.2097	10.0722	10.2036	9.90025	10.0847	10.1486	9.33344	10.3493
A_09_P020886	euchromatic gene	9.86735	8.04128	9.81452	8.90848	9.79449	9.80984	9.87645	9.74608	9.91122	9.5387	10.0234	9.55478	9.42536	9.64053	9.68406	9.37297	9.42388	9.34022	9.82786	9.02031	10.0215
A_09_P020891	euchromatic gene	8.43711	7.70621	8.73527	8.27852	8.46973	8.47385	8.36342	8.18278	8.3694	8.15291	8.39945	7.97644	7.94068	8.24572	8.13752	8.08263	7.97632	8.16564	8.12776	7.36525	8.17045
A_09_P020896	euchromatic gene	9.3562	8.05407	9.64629	9.24647	9.69567	9.82446	9.78927	9.58477	9.88352	9.62417	10.1155	9.39659	9.41625	9.43976	9.50312	9.52136	9.16581	9.47707	9.44511	8.67983	9.76386
A_09_P020901	euchromatic gene	10.1722	8.54655	9.8177	9.08238	9.99432	9.93039	10.2318	10.2719	10.0573	10.1871	10.1204	9.70985	9.81213	10.0585	10.126	10.0298	9.72335	10.0447	10.0895	8.82372	10.3392
A_09_P020906	euchromatic gene	9.69053	8.02381	9.73674	8.85898	9.48808	9.5796	10.0012	9.73002	9.71864	9.7246	9.94285	9.38814	9.56496	9.59952	9.74893	9.40534	9.44558	9.61159	9.74634	8.25073	9.99608
A_09_P020911	euchromatic gene	8.89649	7.58487	9.13074	8.30163	8.83685	8.63416	9.23673	8.65219	8.49238	8.65816	8.55423	8.57629	8.81512	8.4096	8.41288	8.33749	8.59987	8.45166	8.73512	7.79695	9.00758
A_09_P020916	euchromatic gene	10.9625	8.90244	10.6131	9.44211	10.5895	10.61	10.8275	10.7144	10.7244	10.899	10.788	10.4086	10.393	10.7335	10.85	10.5976	10.1556	10.599	10.5653	9.04061	10.8536
A_09_P020921	euchromatic gene	9.56528	7.95834	9.15107	8.36431	9.31093	9.34935	9.78521	9.44267	9.47944	9.553	9.62042	9.26224	9.47722	9.48838	9.72582	9.20104	9.28466	9.39114	9.6907	8.27961	9.79992
A_09_P020926	euchromatic gene	8.90257	7.50814	8.78975	8.19225	8.85735	8.96909	9.13434	8.77287	8.92674	8.9023	8.92249	8.58714	8.80788	8.65018	8.62933	8.70211	8.69877	8.70058	9.12055	7.71372	9.01769
A_09_P020931	euchromatic gene	11.5128	11.0256	10.9852	10.5273	11.3173	11.1842	11.2123	11.2617	11.1352	11.1955	11.1606	10.8968	10.7664	10.9754	10.8517	10.8442	10.8989	10.9483	11.1054	10.9318	11.4468
A_09_P020936	euchromatic gene	8.06892	7.35195	9.07597	8.14332	8.11004	8.29699	8.16174	8.26244	7.86721	8.23307	8.19036	8.29383	8.0125	8.35176	8.4302	8.68653	7.92317	8.70913	7.77584	7.30877	8.21299
A_09_P020941	euchromatic gene	8.70775	7.56707	8.98026	8.58469	8.9446	8.84479	9.20498	8.99505	8.93669	8.88272	8.96352	8.73833	8.80687	8.75686	8.75457	8.64193	8.74556	8.74077	8.94187	8.11882	9.14092
A_09_P020946	euchromatic gene	9.65861	8.01969	9.52592	8.53461	9.35264	9.37488	9.93798	9.55052	9.48999	9.75207	9.58531	9.42627	9.59422	9.62274	9.68979	9.48558	9.46235	9.46896	9.78929	8.33717	10.0386
A_09_P020951	euchromatic gene	8.43928	7.2828	8.65133	7.74387	8.15427	8.23889	8.70933	8.41508	8.36892	8.27577	8.27802	8.43304	8.40011	8.15257	7.99673	8.08375	8.3691	8.01745	8.74696	7.44073	8.86599
A_09_P020956	euchromatic gene	9.66081	8.2136	10.3709	9.07649	9.93195	9.99239	9.95949	9.78286	9.99912	9.70379	10.1504	9.4615	9.27228	9.43668	9.31223	9.32372	9.40032	9.36015	9.66624	8.43179	9.94739
A_09_P020961	euchromatic gene	9.32925	7.82979	9.63597	8.49133	9.22813	9.39202	9.38495	9.25981	9.47208	9.25018	9.624	9.1678	8.81694	9.05646	8.98148	8.86318	8.76481	9.13171	9.06228	7.79998	9.51083
A_09_P020966	euchromatic gene	9.48765	7.95719	9.62689	8.68781	9.48092	9.49216	9.41527	9.59843	9.58897	9.5757	9.72574	8.7829	9.47833	8.94084	9.1099	9.224	9.36594	8.98027	9.66669	8.28951	9.15842
A_09_P020971	euchromatic gene	9.52145	9.1461	10.2403	9.49568	9.56465	9.53823	10.3789	9.85075	9.72305	9.8448	9.56761	9.61509	9.34288	9.5227	9.63462	9.59562	9.54766	9.78683	9.56392	9.54285	10.1975
A_09_P020976	euchromatic gene	10.2038	8.20863	9.47	8.41332	9.9939	9.86585	10.0792	9.97834	9.85943	10.1587	9.99114	9.65881	9.6911	9.97942	9.80222	9.65646	9.59281	9.77469	9.84523	8.2595	10.1797
A_09_P020981	euchromatic gene	7.36552	6.86085	7.23657	7.24518	7.76942	7.62136	8.72302	7.28224	7.40263	7.50312	7.24551	7.4724	7.846	8.04366	8.08606	7.4757	7.55437	7.9985	7.46897	7.63606	8.26233
A_09_P020986	euchromatic gene	9.47422	7.93897	9.33353	8.67822	8.95626	8.80245	9.62924	9.14995	8.91625	9.24027	8.88528	9.09933	9.33984	9.2776	9.07621	8.84189	9.14755	9.08188	9.46635	8.22775	9.71136
A_09_P020991	euchromatic gene	9.68421	8.02006	10.1207	8.94099	9.6442	9.88974	10.0189	9.55888	9.83905	9.71401	9.87871	9.65743	9.58947	9.48923	9.34386	9.56181	9.61209	9.3987	9.71755	8.60002	10.0161
A_09_P020996	euchromatic gene	9.482	7.88903	10.0593	9.08893	9.50549	9.53492	9.63604	9.4227	9.69604	9.427	9.61616	9.06292	9.1949	9.29525	10.3298	9.2464	9.16797	9.27203	9.61379	8.27776	9.84342
A_09_P021001	euchromatic gene	8.619	7.3656	8.64507	7.98574	8.46394	8.38392	8.59123	8.19759	8.33578	8.33096	8.34941	7.48801	8.59486	8.38154	8.74261	8.2848	8.52776	8.33556	8.59078	7.58087	8.24899
A_09_P021006	euchromatic gene	11.2912	9.31142	10.9625	9.71712	10.9726	10.9265	11.1109	10.9947	11.1237	11.1442	11.173	10.6377	10.6752	10.7096	10.6956	10.3416	10.5056	10.4945	10.9026	9.28725	11.1796
A_09_P021011	euchromatic gene	8.781	7.45212	8.91716	8.14649	9.04082	9.22498	9.50199	9.19352	9.57634	9.0953	9.68932	8.65641	8.72824	8.70493	8.50145	9.03381	8.67898	8.6968	9.28373	7.86077	9.2844
A_09_P021016	euchromatic gene	9.31868	7.87081	9.70396	8.88007	9.83438	10.1571	9.7654	9.33506	9.48893	9.31935	10.022	9.25811	9.29615	9.31708	9.05117	9.50426	9.21558	8.9979	9.60753	8.41941	9.89554
A_09_P021021	euchromatic gene	10.6072	9.70018	11.1248	10.6963	10.9319	10.8529	10.6147	11.3384	11.0174	11.3867	11.0327	10.6432	10.5926	10.8045	11.0634	11.3479	10.3953	11.2432	10.6339	10.2059	10.842
A_09_P021026	euchromatic gene	9.25237	7.79086	9.4047	8.58525	9.23687	9.2027	9.76428	9.30326	9.40214	9.32585	9.4293	9.07914	9.03651	9.00562	8.93607	8.99016	9.01984	9.0856	9.39603	8.09157	9.61712
A_09_P021031	euchromatic gene	9.8367	9.02974	10.5508	9.86971	10.089	10.2199	10.1236	10.2116	10.2096	10.1042	10.2186	9.52817	9.6389	9.65154	9.87574	10.0085	9.53254	10.0745	9.8016	8.94827	10.0272
A_09_P021036	euchromatic gene	9.21226	7.83292	9.45568	8.41607	9.24019	9.2137	9.63503	9.40004	9.13598	9.63188	9.41512	8.96218	8.92779	9.04081	9.19634	9.25258	8.91249	9.37822	9.17053	8.04431	9.57483
A_09_P021041	euchromatic gene	9.00083	8.05481	9.5266	8.94399	9.23739	9.07805	9.56456	9.37944	9.19453	9.35755	9.14088	8.89821	8.95947	9.14523	9.18545	9.07429	9.01272	9.09538	9.19874	8.43444	9.57897
A_09_P021046	euchromatic gene	8.78584	7.59522	9.14457	8.19549	8.71269	8.72024	9.37631	8.87421	8.78261	8.79669	8.86814	8.87855	8.93098	8.53034	8.60054	8.67595	8.85992	8.75593	9.12636	7.83502	9.15875
A_09_P021051	euchromatic gene	10.2604	9.38822	10.7982	10.2115	10.6094	10.474	10.3717	10.443	10.5979	10.3335	10.6986	9.9031	9.93066	10.0296	10.2339	10.0897	9.91553	10.1608	10.274	9.40382	10.534
A_09_P021056	euchromatic gene	9.40115	7.97347	9.75131	8.56047	9.34069	9.31827	9.75743	9.47736	9.43558	9.38658	9.49194	9.25196	9.26781	9.12958	9.16429	9.15986	9.19266	9.21968	9.64868	8.15201	9.7818
A_09_P021061	euchromatic gene	8.52536	7.29754	9.01903	8.48116	8.59732	8.56992	8.81531	8.30448	8.47853	8.53863	8.42803	8.19195	8.37745	8.3048	8.18087	8.31697	8.44266	8.33969	8.62523	7.46212	8.76011
A_09_P021066	euchromatic gene	8.56979	7.32429	8.56745	8.14927	8.47238	8.40244	8.87213	8.35301	8.57866	8.52041	8.54146	8.33294	8.47255	8.37903	8.31444	8.37546	8.38818	8.33198	8.51342	7.49887	8.71263
A_09_P021071	euchromatic gene	9.16374	7.92087	9.3477	8.48034	9.16047	9.60133	9.29298	9.20402	9.25202	9.24737	9.85134	9.08425	9.05727	8.89236	8.98104	9.14943	8.96344	9.09875	9.41529	8.04339	9.40133
A_09_P021076	euchromatic gene	9.99632	8.41854	10.1914	8.94356	10.0399	10.0834	10.133	9.91819	10.169	9.97405	10.1734	9.78014	9.82132	9.68142	9.62759	9.82462	9.67587	9.60618	10.014	8.58181	10.2055
A_09_P021086	euchromatic gene	9.02918	7.82459	9.39904	8.41124	9.139	8.98717	9.39174	8.98497	9.12529	8.96888	9.17472	8.7988	8.96861	8.73788	8.84692	8.64667	8.84597	8.83561	9.08613	8.12377	9.3345
A_09_P021091	euchromatic gene	9.75572	9.13346	10.0982	9.59637	10.2601	9.8533	9.98143	9.95782	9.90916	9.84115	10.0378	9.48078	9.57627	9.54702	9.66129	9.52578	9.52739	9.69468	9.6998	9.23219	10.0184
A_09_P021096	euchromatic gene	10.3091	9.4369	8.83738	9.91696	10.533	10.6501	10.4183	10.3674	10.4207	10.2713	10.5117	10.1233	10.1636	10.459	10.5572	10.3286	9.79497	10.3761	9.9649	9.65617	10.4966
A_09_P021101	euchromatic gene	9.68533	8.00194	9.94285	8.98243	9.35165	9.26436	9.85618	9.63096	9.47704	9.55483	9.56258	9.33803	9.54096	9.43548	9.56978	9.11328	9.36953	9.29964	9.8461	8.31287	10.0528
A_09_P021106	euchromatic gene	8.6778	7.42457	8.64442	8.01347	8.5374	8.44643	8.75123	8.49074	8.31673	8.4338	8.57368	8.41127	8.61104	8.44265	8.50522	8.31598	8.48692	8.45252	8.68174	7.63286	8.76317
A_09_P021111	euchromatic gene	9.95103	8.23748	9.99274	8.89928	10.0381	10.0536	10.4306	10.0949	10.0817	10.1401	10.2103	9.76529	9.77454	9.96703	9.88243	9.61297	9.65652	9.73645	10.0995	8.63049	10.4393
A_09_P021116	euchromatic gene	9.29559	7.81344	9.21914	8.67086	8.97367	8.88382	9.46079	9.21065	8.99698	9.27135	9.06411	8.89908	9.05215	8.94447	8.99232	8.93069	9.01122	8.97986	9.5364	8.13014	9.53435
A_09_P021121	euchromatic gene	10.6525	9.98083	11.0617	10.2982	10.8886	10.9488	11.8816	11.5634	11.4665	11.3776	11.108	10.9419	10.9045	10.8848	11.1394	11.1545	10.7877	11.1165	11.1445	10.7597	11.7286
A_09_P021126	euchromatic gene	8.81331	7.43679	9.42384	8.56774	8.77141	8.66397	8.88334	8.52952	8.73224	8.34942	8.84136	8.38881	8.54011	8.57722	8.31852	8.36943	8.64031	8.42472	8.81517	7.79259	9.00643
A_09_P021131	euchromatic gene	9.20375	7.66961	9.03358	8.43951	9.13217	9.19868	9.45378	8.95061	9.27982	9.1486	9.15355	8.8042	9.05005	8.90513	8.83241	8.9531	8.93193	8.80982	9.22362	7.84199	9.25534
A_09_P021136	euchromatic gene	9.93104	8.83981	10.6774	9.98174	10.4024	10.5189	9.81646	10.1012	10.4339	10.0469	10.6956	9.4358	9.44963	9.93053	10.0737	9.89215	9.15589	10.0091	9.84596	8.71189	9.82311
A_09_P021141	euchromatic gene	9.58055	8.149	10.3017	8.96722	9.79187	9.59197	10.065	9.7526	9.7634	9.72194	10.0703	9.5598	9.48053	9.48629	9.83711	9.40648	9.35931	9.52227	9.9159	8.45036	10.1813
A_09_P021146	euchromatic gene	10.15	8.42453	9.94686	9.08948	9.75638	9.80511	10.3345	10.1407	9.9555	9.98953	10.0341	9.80142	9.87324	9.82635	9.6777	9.63519	9.74688	9.74768	10.1507	8.64588	10.385
A_09_P021151	euchromatic gene	9.19998	7.76639	9.49012	8.98859	8.90023	8.82968	9.39985	8.98582	8.95493	9.14588	8.85441	8.8951	9.05133	8.86968	8.92117	8.75332	8.96612	8.99937	9.26492	8.26083	9.35889
A_09_P021156	euchromatic gene	8.51265	7.42152	8.89908	8.14591	8.52493	8.62304	8.86753	8.48569	8.61433	8.40597	8.70344	8.65629	8.62631	8.62334	8.40748	8.4337	8.5727	8.39872	8.88634	7.69802	8.97204
A_09_P021166	euchromatic gene	10.5101	8.73961	10.7745	9.31459	10.3419	10.6234	10.5606	10.4034	10.6637	10.3336	10.8401	10.3465	10.3224	10.2003	10.1153	10.174	10.1717	9.81892	10.7081	9.09423	10.7999
A_09_P021171	euchromatic gene	9.4159	7.86602	9.70906	8.82717	9.42406	9.33797	9.84917	9.54311	9.38209	9.38736	9.41029	9.30787	9.35434	9.17754	9.17573	9.04649	9.20693	9.15866	9.73139	8.31866	9.82147
A_09_P021176	euchromatic gene	9.5371	8.17614	9.48701	8.59189	9.30827	9.44979	9.87297	9.52284	9.45844	9.33777	9.59636	9.33538	9.38992	9.41112	9.35065	9.49123	9.42887	9.21222	9.61832	8.42916	9.8409
A_09_P021181	euchromatic gene	8.89704	7.99899	9.40058	8.63762	9.27707	9.30358	9.58022	9.01344	9.49066	8.89365	9.39764	8.39358	8.34402	8.98873	8.81442	8.85663	8.60592	8.82382	8.6388	7.75155	8.9601
A_09_P021186	euchromatic gene	8.69853	7.37698	8.92637	8.13429	8.94433	8.87049	9.05202	8.58084	8.72299	8.02539	7.79621	8.41439	8.59549	8.50373	8.40824	8.51827	8.55559	8.49071	8.87646	7.54871	8.91636
A_09_P021191	euchromatic gene	9.92437	8.59828	10.3573	9.75729	10.246	10.3482	10.0802	10.0973	10.3766	10.0058	10.3312	9.89962	10.055	9.76103	10.3436	10.0559	9.87058	9.91178	9.99674	9.15168	10.1708
A_09_P021196	euchromatic gene	9.5455	8.03148	9.41312	8.66933	9.47004	9.35566	9.74257	9.15204	9.61756	9.21429	9.26714	9.22589	9.51871	9.191	9.15793	9.00171	9.27623	9.074	9.59491	8.59145	9.72747
A_09_P021201	euchromatic gene	9.64069	8.23323	9.72288	8.66877	9.60749	9.58739	9.90393	9.5492	9.74289	9.60749	9.87749	9.40667	9.39278	9.39441	9.34551	9.1546	9.40679	9.45802	9.62362	8.47654	9.94249
A_09_P021206	euchromatic gene	9.4218	8.06031	9.24594	8.36943	9.8081	9.87689	9.425	9.52401	9.82152	9.651	10.0392	8.93107	8.85341	9.44569	9.52676	9.23929	8.66912	9.51421	9.24293	7.90812	9.38287
A_09_P021211	euchromatic gene	10.0222	8.67756	9.88429	9.06736	10.0802	10.2431	9.83149	9.90918	10.0779	10.0463	10.204	9.34877	9.35986	9.70692	9.67812	9.76241	9.28248	9.65095	9.72103	8.23979	9.81725
A_09_P021216	euchromatic gene	8.92925	7.66756	9.6197	8.83104	8.8972	8.95916	9.2705	9.06646	9.00649	9.08518	8.99948	8.74285	8.91562	8.86232	8.85595	8.81397	8.74126	8.79231	9.0713	7.94894	9.20547
A_09_P021221	euchromatic gene	9.82734	8.10003	9.67203	8.56381	9.91224	9.64841	9.93358	9.79036	9.77689	9.65559	9.83923	9.396	9.58741	9.59904	9.79947	9.37519	9.48098	9.41315	9.73004	8.95324	10.0755
A_09_P021226	euchromatic gene	11.3161	11.0459	11.2328	11.2484	11.658	11.5513	11.3875	11.5184	11.6038	11.646	11.7141	10.7061	10.798	11.0225	11.3301	11.4245	10.7233	11.5099	10.9156	10.8037	11.1926
A_09_P021231	euchromatic gene	9.06961	7.71378	9.40987	8.83811	8.90037	8.86786	9.30838	8.99291	8.8479	8.96593	8.69588	8.83354	8.81922	8.92888	8.83468	8.63416	8.71552	8.86282	9.10803	7.9709	9.19189
A_09_P021236	euchromatic gene	8.49983	7.4323	9.61687	9.03297	8.56423	8.56893	9.2004	8.52453	8.49734	8.39417	8.42421	8.8956	8.53534	8.4788	8.40157	8.27011	8.5874	8.40579	8.92123	7.79902	8.90345
A_09_P021241	euchromatic gene	10.0246	8.23939	9.99157	8.71581	10.0078	10.0218	10.4672	10.14	10.2477	10.1797	10.3073	9.95726	10.0289	10.0014	10.205	9.73021	9.8508	9.80019	10.2168	8.70607	10.5225
A_09_P021246	euchromatic gene	9.39873	8.02553	9.30904	8.39757	9.38273	9.49491	9.90968	9.29266	9.43502	9.48091	9.4792	9.22744	9.30913	9.09715	9.06139	9.27106	9.21335	9.16836	9.53963	8.33521	9.74956
A_09_P021251	euchromatic gene	9.16665	7.76413	8.73273	8.21485	8.85828	8.66668	9.36382	9.27002	8.84354	9.04034	8.90251	8.84246	9.10626	8.93148	8.83749	8.68564	9.00404	8.81568	9.17603	8.23391	9.37465
A_09_P021256	euchromatic gene	9.77954	8.27604	9.98524	8.99038	9.73718	9.49897	9.9296	9.6677	9.71261	9.65119	9.85219	9.44199	9.64313	9.44002	9.48174	9.32596	9.47839	9.40816	9.80073	8.60409	9.98102
A_09_P021261	euchromatic gene	9.99461	9.04823	10.2655	9.84385	10.4085	10.5621	10.2561	10.1746	10.1128	10.0616	10.1576	9.56937	9.71591	10.1081	10.1413	10.4863	9.62687	10.1029	9.61445	9.11051	10.0222
A_09_P021266	euchromatic gene	9.15282	7.74934	9.33907	8.4149	8.9555	9.13557	8.85048	9.32433	9.33812	9.06881	8.71826	9.23402	8.29253	9.05329	8.99604	9.11811	9.09005	8.87203	9.31455	8.07139	9.35507
A_09_P021271	euchromatic gene	9.64232	8.18658	9.55822	8.38409	9.58471	9.63594	9.60484	9.36722	9.74857	9.51745	9.97384	9.16363	9.17329	9.31337	9.47386	9.2912	9.11985	9.3304	9.42968	8.26876	9.80957
A_09_P021276	euchromatic gene	9.65582	8.24526	9.52529	9.12966	9.72912	9.74974	10.0247	9.58719	9.79902	9.74489	9.76119	9.37582	9.49624	9.50866	9.48805	9.74467	9.36351	9.51046	9.54319	9.08773	9.75932
A_09_P021281	euchromatic gene	8.88891	7.49097	8.49699	7.898	8.72723	8.35613	8.93399	8.51996	8.5343	8.5305	8.55276	8.53962	8.75748	8.51289	8.55048	8.1912	8.6661	8.4048	8.84622	7.7499	9.00841
A_09_P021286	euchromatic gene	9.42304	8.20958	9.91641	8.87915	9.6782	9.74418	9.85096	9.60586	9.69287	9.6451	9.91155	9.55531	9.53061	9.36409	9.41865	9.3429	9.50027	9.43364	9.86244	8.60827	10.0762
A_09_P021291	euchromatic gene	10.2178	8.95037	10.4158	9.90086	10.3537	10.11	10.1972	10.2146	10.2265	10.1319	10.3502	9.81556	9.87003	9.8845	10.0278	9.89015	9.83764	10.0026	10.0462	9.30664	10.3828
A_09_P021296	euchromatic gene	9.50345	8.12747	9.69	8.85474	9.72396	10.0083	9.83965	9.70683	9.81399	9.47176	10.0278	9.27317	9.30687	9.49214	9.42967	9.50813	9.1398	9.39955	9.49116	8.31659	9.8304
A_09_P021301	euchromatic gene	8.66259	7.60919	9.60283	8.75946	8.96301	8.97058	9.31125	8.75075	9.03785	8.80982	9.03754	8.52762	8.7106	8.43973	8.34623	8.6633	8.6735	8.5739	9.14059	7.84144	9.13464
A_09_P021306	euchromatic gene	9.4832	7.92478	9.67833	8.93262	9.62734	9.74869	9.48119	9.58605	9.6328	9.47205	9.9296	9.54613	8.90951	9.40203	9.2786	9.39311	8.8704	9.35314	9.35396	7.97892	9.38783
A_09_P021311	euchromatic gene	9.13003	7.7164	9.02912	8.40731	9.07471	8.9788	9.35969	8.9811	9.14465	9.16419	9.12483	8.93648	9.09404	9.15567	9.04804	8.78864	8.91801	8.92763	9.16231	8.01766	9.37869
A_09_P021316	euchromatic gene	8.67182	7.38599	8.7601	8.15699	8.45385	8.50828	8.77231	8.38668	8.52873	8.34712	8.58293	8.34338	8.58025	8.47034	8.2822	8.26745	8.39821	8.2871	8.74668	7.70279	8.86102
A_09_P021321	euchromatic gene	10.4602	9.08006	10.6514	9.92278	10.5407	10.8925	10.9008	10.5666	10.6386	10.3951	10.8788	10.3238	10.2806	10.4411	10.4235	10.4765	10.1345	10.2762	10.6159	9.20148	10.8782
A_09_P021326	euchromatic gene	8.61082	7.51319	9.32257	9.12906	9.14864	9.1893	9.0725	8.9129	8.97759	8.68934	9.04465	8.68473	8.87354	8.95486	9.02177	8.79723	8.53115	8.93256	8.59734	8.58261	8.96307
A_09_P021331	euchromatic gene	10.3978	8.82022	10.1934	8.96372	10.4916	10.6283	9.28609	10.3979	10.6638	10.0665	10.8062	9.18735	8.96488	10.19	9.81656	9.67502	8.93986	9.79412	9.2545	7.87487	9.71319
A_09_P021336	euchromatic gene	10.815	9.94628	10.6108	10.2903	10.8375	11.0563	10.3057	10.7741	10.9705	10.9037	11.05	9.96562	9.84125	10.7197	10.9026	10.7151	9.74434	10.7861	9.65111	9.56419	10.4461
A_09_P021341	euchromatic gene	9.42588	7.97765	9.24156	8.50093	9.16234	9.2709	9.40147	9.21488	9.31015	9.11345	9.47893	9.15205	9.27059	9.08729	9.08624	8.83871	9.09028	9.06025	9.32416	8.2576	9.53384
A_09_P021346	euchromatic gene	8.57813	7.32495	8.64097	8.17793	8.58764	8.54125	9.01623	8.80512	8.53963	8.82046	8.49981	8.31421	8.46781	8.67753	8.68837	8.70307	8.42502	8.74475	8.5579	7.61261	8.83366
A_09_P021351	euchromatic gene	9.41816	8.74921	9.73143	8.55849	9.62976	9.65805	9.53442	10.8035	9.55849	9.37505	9.7547	9.1376	9.35111	9.29743	9.28279	8.97202	9.12021	9.22828	9.49675	8.16892	9.55991
A_09_P021356	euchromatic gene	8.89787	7.60798	9.48092	8.4068	8.91706	8.81944	9.59996	8.85192	9.04692	8.8657	8.91398	8.69637	8.80938	8.67089	8.59357	8.47393	8.87156	8.69066	9.14088	7.86265	9.34841
A_09_P021361	euchromatic gene	9.21015	8.00507	9.55351	8.65386	9.08725	9.11389	9.39206	9.22464	9.19681	9.20128	9.13575	8.89988	9.0236	8.90882	8.95581	8.96489	8.97781	9.01874	9.36362	8.01042	9.35703
A_09_P021366	euchromatic gene	10.8276	8.7548	10.9631	9.17235	10.7478	10.8592	11.0437	10.7666	11.0288	10.7024	11.1741	10.4071	10.422	10.4403	10.4934	10.2434	10.3244	10.4103	10.6006	9.14989	11.0698
A_09_P021371	euchromatic gene	8.45289	7.52134	9.2299	8.65249	8.48712	8.59037	8.82137	8.43347	8.50611	8.52888	8.66556	9.97355	8.43275	8.48641	8.30413	8.40091	8.51097	8.48842	8.56738	7.73688	8.84397
A_09_P021376	euchromatic gene	8.73806	7.4285	9.23035	8.55673	8.84423	8.9077	9.20151	8.70096	8.74321	8.64343	8.92942	8.68234	8.74722	8.55645	8.59105	8.27622	8.70089	8.40106	8.8524	7.73976	9.21965
A_09_P021381	euchromatic gene	9.43427	7.89214	9.99926	9.00023	9.56976	9.63395	9.67817	9.3618	9.52382	9.39445	9.62466	9.0366	9.16476	9.13606	9.00307	9.10918	9.25678	9.07995	9.70562	8.12631	9.71788
A_09_P021386	euchromatic gene	8.95585	7.78439	9.72889	8.87933	9.21897	9.26965	9.54366	9.27504	9.40065	9.06271	9.60687	9.08927	9.07438	9.15688	9.07588	8.95346	8.97263	9.00709	9.39481	8.30722	9.45393
A_09_P021391	euchromatic gene	10.1179	8.66239	10.351	10.0747	10.2735	10.0704	10.2919	10.1433	10.1813	10.2834	10.3012	9.68454	9.81385	9.92068	10.0135	9.87545	9.69207	9.96107	10.0293	9.15349	10.2395
A_09_P021396	euchromatic gene	10.3104	8.65795	10.1951	9.19756	10.1759	10.0138	10.3405	9.90916	10.1676	10.1774	10.2323	9.74244	9.82608	10.0196	9.85852	9.66107	9.7931	9.72231	10.0727	8.65821	10.3614
A_09_P021401	euchromatic gene	9.06126	8.47221	9.71837	9.58762	9.50412	9.55246	9.53695	9.43274	9.33946	9.13745	9.33144	9.03231	9.19719	9.18399	9.01432	9.25319	9.12531	9.3882	9.08664	8.84365	9.38595
A_09_P021406	euchromatic gene	9.72537	8.43003	10.1919	9.14598	9.89297	9.91975	10.1052	9.64691	9.99062	9.60683	10.1864	9.6158	9.52538	9.51033	9.5855	9.42825	9.5963	9.50348	10.0724	8.88727	9.99761
A_09_P021411	euchromatic gene	9.11035	7.79639	9.47086	8.373	8.97979	9.07332	9.47194	9.15118	9.20992	8.99602	9.2488	9.5155	9.04423	8.9464	8.94031	8.89154	8.98695	8.97876	9.42452	8.13647	9.24116
A_09_P021416	euchromatic gene	9.06927	7.85394	9.54928	8.64659	9.02256	9.19266	9.16248	8.92969	9.10954	8.75745	9.22745	8.8727	9.02414	8.81389	8.66707	8.73098	8.97013	8.72766	9.29012	7.98165	9.44208
A_09_P021421	euchromatic gene	9.45716	7.77971	9.87071	8.70716	9.4555	9.45577	9.55483	9.23427	9.47906	9.31553	9.57661	9.06337	9.15982	9.12906	9.15662	8.99206	9.15094	8.9627	9.35398	8.28141	9.63379
A_09_P021426	euchromatic gene	9.51166	7.86719	10.0478	8.94144	9.30045	9.28839	9.58326	9.23358	9.28456	8.86548	9.34629	8.98618	9.09953	9.02557	9.13083	8.78507	9.03019	8.99887	9.35403	8.32017	9.64259
A_09_P021431	euchromatic gene	9.30424	7.86426	9.58649	8.76961	9.3579	9.25173	9.61227	9.14571	9.43812	9.1093	9.43889	8.90109	9.04051	8.91399	8.76896	8.65855	9.02557	8.88993	9.31811	8.15613	9.60586
A_09_P021436	euchromatic gene	9.54514	8.07156	9.60886	8.46854	9.57719	9.62738	9.93824	9.64693	9.7506	9.42598	9.92621	9.50427	9.49009	9.36734	9.2446	9.45884	9.37808	9.20868	9.69545	8.36366	9.94616
A_09_P021441	euchromatic gene	9.60461	7.94916	9.61749	8.5942	9.54042	9.70464	9.88441	9.3261	9.81512	9.4601	9.92045	9.3264	9.39569	9.50452	9.25452	9.18271	9.33916	9.25646	9.65488	8.22628	9.93469
A_09_P021446	euchromatic gene	9.45352	7.98438	9.56661	8.52074	9.46114	9.45098	9.35916	9.12755	9.52358	9.26219	9.50089	9.14658	9.22716	9.08892	9.04078	9.01638	9.01636	9.07054	9.39672	8.07184	9.62515
A_09_P021456	euchromatic gene	9.09916	8.24334	9.4146	8.69456	9.38051	9.46411	9.4666	9.17076	9.37349	9.16192	9.52246	9.02463	8.95968	9.14978	9.07428	8.99369	9.01134	9.10479	9.28899	8.23454	9.25059
A_09_P021461	euchromatic gene	9.88886	8.26855	10.2664	9.4364	9.74698	9.91306	9.9657	9.68401	10.0228	9.63223	10.183	9.5827	9.67207	9.72966	9.57363	9.37019	9.56729	9.45877	10.0249	8.67038	10.0642
A_09_P021466	euchromatic gene	9.83529	8.03053	9.48823	8.4658	9.59565	9.49045	9.92187	9.58172	9.75813	9.68693	9.81863	9.52071	9.58275	9.53614	9.47826	9.31258	9.38745	9.42584	9.80912	8.28754	9.98282
A_09_P021471	euchromatic gene	9.8899	8.11582	9.6413	8.56339	9.78406	9.74324	10.0529	9.79963	9.84255	9.99452	10.0569	9.41793	9.45781	9.73268	9.62202	9.53754	9.40437	9.58243	9.71407	8.39535	10.0573
A_09_P021476	euchromatic gene	9.93901	8.3678	9.58256	8.84063	9.53547	9.41198	10.0603	9.6475	9.69148	9.76747	9.72995	9.59558	9.72437	9.64168	9.58351	9.5322	9.59371	9.58045	10.0621	8.76216	10.2134
A_09_P021481	euchromatic gene	8.54995	7.38857	8.72102	8.09341	8.67328	8.67674	8.8697	8.75763	8.76633	8.50796	8.91455	8.13392	8.29744	8.52956	8.48474	8.42269	8.24891	8.50672	8.37014	7.33385	8.59988
A_09_P021486	euchromatic gene	8.6428	7.55434	9.25738	8.35075	9.00002	8.90596	9.05768	8.67699	8.95832	8.92053	9.03959	8.38797	8.53507	8.73298	8.72569	8.45692	8.73356	8.69716	9.08872	7.8904	9.08098
A_09_P021491	euchromatic gene	9.26615	7.69533	9.66818	8.68166	9.35143	9.34065	9.70997	9.15011	9.55545	9.21167	9.51849	9.01795	9.13258	9.086	9.04966	8.87334	9.0483	9.00217	9.24124	8.12381	9.543
A_09_P021496	euchromatic gene	10.1153	8.27631	10.2934	8.90139	10.177	10.2881	10.3147	10.0969	10.2363	10.0691	10.5044	9.5573	9.80087	9.65415	9.56009	9.91024	9.89743	9.74767	10.2697	8.39226	10.3035
A_09_P021501	euchromatic gene	9.8996	8.17608	10.1849	9.17718	10.022	10.0158	10.4418	10.0018	10.2212	9.91651	10.1906	9.50078	9.60298	9.68973	9.41931	9.62254	9.56918	9.5754	10.0944	8.37046	10.197
A_09_P021506	euchromatic gene	11.813	10.8672	10.7399	10.1071	11.0379	11.1622	12.237	11.6973	11.2865	11.9751	11.3929	11.4319	11.3737	11.5716	11.7208	11.455	11.159	11.4289	11.6225	11.0086	12.0194
A_09_P021511	euchromatic gene	9.64177	7.98171	9.77966	8.8794	9.6247	9.46671	9.57764	9.3863	9.388	9.43404	9.38018	9.57321	9.67529	9.17852	9.4821	9.04901	9.18077	9.16104	9.60155	8.62641	9.74715
A_09_P021516	euchromatic gene	8.84621	7.41657	9.16341	8.25243	8.67604	8.57446	9.16623	8.46721	8.86396	8.28986	8.91984	8.29575	8.51467	8.39653	8.33174	8.3751	8.80845	8.66034	8.88995	7.78988	8.93362
A_09_P021521	euchromatic gene	9.84999	8.36723	10.3021	9.22814	9.87746	9.94715	9.94406	9.83009	9.95096	9.61688	10.271	9.50101	9.37252	9.61614	9.36534	9.49907	9.56787	9.61283	9.97228	8.6616	10.1467
A_09_P021526	euchromatic gene	10.1919	8.26463	10.0323	8.92569	9.86548	9.85017	10.3692	9.91843	9.95258	10.0308	10.0217	9.71564	9.90677	9.88685	9.74645	9.56155	9.79529	9.56464	10.063	8.68867	10.3707
A_09_P021531	euchromatic gene	9.84899	8.17681	10.2258	8.966	9.86158	9.96691	9.61876	9.71186	10.0784	9.77341	10.2155	9.62319	9.16008	9.60079	9.58644	9.49669	8.99012	9.56656	9.66703	7.9568	9.53144
A_09_P021536	euchromatic gene	9.10973	7.85778	8.96318	8.56957	9.19619	9.28919	9.22374	8.97637	9.41724	9.03878	9.56048	8.82845	8.94763	8.93059	9.07362	8.91104	8.62994	8.93402	9.07663	7.73305	9.20566
A_09_P021541	euchromatic gene	8.90734	7.63445	9.25881	8.40206	9.06584	9.05119	8.81672	8.69154	9.05662	8.76581	9.13158	8.47007	8.54094	8.72647	8.59606	8.53513	8.65872	8.55826	8.91286	7.73393	9.13558
A_09_P021546	euchromatic gene	8.77789	7.48448	8.84306	8.23725	8.6344	8.67302	9.08711	8.80713	8.71611	8.77415	8.7148	8.45604	8.67766	8.59677	8.57523	8.43705	8.61255	8.65017	8.88622	7.78048	8.90659
A_09_P021551	euchromatic gene	9.73833	8.01767	10.151	9.20317	9.35482	9.11062	9.62529	9.61008	9.41859	9.60575	9.39019	9.2771	9.34954	9.3071	9.42482	9.13955	9.22601	9.25971	9.74228	8.24118	9.75814
A_09_P021556	euchromatic gene	9.17092	7.818	9.26017	8.33788	9.12278	8.8407	9.22008	8.89478	9.03658	8.95304	9.18874	8.77429	8.91744	8.78761	8.90853	8.63395	8.94555	8.62316	9.17162	8.02783	9.34649
A_09_P021561	euchromatic gene	9.99789	8.22777	10.4636	8.98734	9.89044	9.82547	9.83713	9.98872	10.2075	9.87632	10.4917	9.34849	9.49356	9.69498	9.73606	9.47684	9.27507	9.68149	9.59936	8.25965	10.0247
A_09_P021566	euchromatic gene	9.349	7.85656	9.37126	8.50952	9.47979	9.50311	9.67693	9.53025	9.5564	9.51236	9.6126	9.12447	9.28629	9.27808	9.32363	9.14562	9.16609	9.24175	9.40482	8.08628	9.78685
A_09_P021571	euchromatic gene	9.71966	8.24876	9.73153	8.41797	9.6626	9.84776	9.32044	9.64315	9.86002	9.73406	10.1498	8.88929	9.1642	9.53026	9.74778	9.60732	9.03809	9.59635	9.39531	7.91901	9.60199
A_09_P021576	euchromatic gene	8.84703	7.63775	8.92162	7.95152	8.59482	8.74782	9.05108	8.81983	8.94723	8.84843	9.03807	8.58069	8.64009	8.65308	8.46483	8.52811	8.68212	8.5375	8.88438	7.72576	8.96737
A_09_P021581	euchromatic gene	9.09825	7.83777	9.46729	8.70419	9.17026	8.97709	9.26831	8.96023	8.89754	9.03781	8.888	8.63077	8.80222	8.85665	8.70416	8.6482	8.87959	8.82467	9.20209	8.24779	9.2657
A_09_P021586	euchromatic gene	9.17847	7.73541	9.68666	8.62437	9.14102	8.89466	9.39262	9.18313	9.33001	9.05221	9.37279	9.08809	9.24113	8.86751	8.99406	8.85467	9.09771	9.03313	9.39411	8.06396	9.41028
A_09_P021591	euchromatic gene	8.90907	7.64574	9.17689	8.61224	9.61431	9.56861	9.11668	9.4553	9.56405	9.20251	9.80121	8.81459	8.90623	9.00069	9.02678	9.12319	8.81639	9.30837	9.00646	8.24459	9.28085
A_09_P021596	euchromatic gene	10.3002	8.63448	10.0524	9.08591	9.99561	10.1011	10.5276	10.0435	10.1995	10.0169	10.3911	9.85474	9.86399	9.92079	9.92481	9.77594	9.87298	9.81343	10.2308	8.83181	10.4189
A_09_P021601	euchromatic gene	10.2558	8.68719	10.6394	9.64023	10.543	10.3874	10.4323	10.3214	10.468	10.2259	10.6664	9.97555	10.0029	10.0135	10.1327	10.1109	9.79665	10.0154	10.3352	8.99739	10.6129
A_09_P021606	euchromatic gene	8.87761	7.58355	8.94247	8.41475	8.64506	8.45823	9.33317	8.76487	8.63694	8.87657	8.66699	8.71217	8.88147	8.86962	8.83035	8.50816	8.82542	8.77134	9.06642	8.09228	9.29911
A_09_P021611	euchromatic gene	8.75523	7.48303	9.05899	8.25139	8.81426	8.90166	9.09863	8.78518	8.8726	8.59406	9.15378	8.51549	8.64643	8.5977	8.43856	8.59758	8.68757	8.55385	8.98443	7.727	9.11186
A_09_P021616	euchromatic gene	9.4738	7.82961	9.77505	8.79694	9.37562	9.42067	9.47667	9.43314	9.42146	9.41563	9.39588	8.97695	9.21558	9.11906	9.22397	9.23468	9.0683	9.28106	9.66185	8.09546	9.61723
A_09_P021621	euchromatic gene	9.07934	7.70895	9.71561	8.91701	9.12443	9.14627	9.45881	8.94404	9.17017	9.04783	9.35356	8.98297	9.128	9.02671	9.0511	8.91932	9.08206	8.96315	9.42939	8.07802	9.5744
A_09_P021626	euchromatic gene	9.5587	7.95335	9.98539	9.02089	9.56294	9.634	9.92616	9.4402	9.66789	9.56735	9.75172	9.51911	9.49406	9.41082	9.37369	9.38408	9.49201	9.34152	9.80292	8.42487	9.95479
A_09_P021631	euchromatic gene	9.18267	8.01644	9.44674	8.71827	9.19758	9.31755	9.54565	9.39688	9.46575	9.15908	9.53798	9.07759	9.12403	9.15684	8.91543	9.21756	9.08915	9.12107	9.40236	8.20068	9.48465
A_09_P021636	euchromatic gene	9.76934	8.08767	10.1576	8.7708	9.8186	9.7977	10.0568	9.96406	9.82288	9.88407	9.85101	9.47322	9.60664	9.75307	9.90846	9.77048	9.43946	9.64338	9.85593	8.38299	10.1734
A_09_P021641	euchromatic gene	10.9056	10.3456	11.3813	11.2147	11.648	11.6731	10.7986	11.2481	11.6778	11.1702	11.6272	10.2652	10.1887	10.6716	10.8681	10.9684	10.0976	11.0173	10.38	10.0551	10.7337
A_09_P021646	euchromatic gene	10.6987	9.83482	11.0135	10.2847	10.7699	11.026	10.4228	10.7939	10.9575	10.6135	11.0618	10.0224	9.95622	10.5629	10.5401	10.8396	9.95418	10.4472	10.102	9.50634	10.6007
A_09_P021651	euchromatic gene	9.71349	8.31928	9.34558	8.74996	9.95806	9.70406	9.86444	9.91831	10.0573	9.79053	10.1053	9.27441	9.33128	9.67292	9.77236	9.72286	9.27218	9.75606	9.31243	8.62149	9.79139
A_09_P021656	euchromatic gene	9.44961	7.84183	9.13958	8.10083	9.67311	9.89689	9.9224	9.73456	9.67493	9.532	9.92429	9.13503	9.27176	9.49087	9.2909	9.51353	9.16724	9.38474	9.37081	8.01589	9.81105
A_09_P021661	euchromatic gene	9.5037	8.0752	9.60869	8.90186	9.25297	9.13468	9.68951	9.38084	9.34276	9.54228	9.36941	9.08501	9.30932	9.32992	9.263	9.10025	9.26528	9.20235	9.44906	8.50864	9.68377
A_09_P021666	euchromatic gene	9.32681	7.82136	9.7139	8.80356	9.57925	9.61997	9.89894	9.37664	9.72498	9.41696	9.62864	9.15285	9.29691	9.22511	8.96134	9.04895	9.29638	9.14889	9.59824	8.19345	9.68043
A_09_P021671	euchromatic gene	8.35221	7.26815	8.5424	8.04919	8.20153	8.36356	8.7197	8.17281	8.34155	8.18139	8.22531	8.06623	8.24822	8.22517	8.23293	8.10213	8.32786	8.25827	8.36931	7.42233	8.2194
A_09_P021676	euchromatic gene	9.79872	8.14244	9.78348	8.59152	9.74266	9.57909	10.0899	9.85443	9.84033	9.73749	9.70428	9.77517	9.76635	9.49378	9.74764	9.54837	9.5929	9.51055	10.026	8.42663	10.0009
A_09_P021681	euchromatic gene	9.06147	7.76243	8.82838	8.56782	9.06098	8.90823	9.33269	9.15726	9.0446	9.11903	9.16572	8.91147	9.1252	8.96365	9.15407	8.8469	9.03333	8.89376	9.42352	8.19301	9.41298
A_09_P021686	euchromatic gene	9.63879	7.83913	9.52371	8.53084	9.49278	9.32996	9.9482	9.50214	9.44755	9.44858	9.74686	9.3281	9.48133	9.30766	9.33927	9.12967	9.25199	9.23222	9.50289	8.43107	10.0954
A_09_P021691	euchromatic gene	9.77613	8.26471	9.87842	8.94217	9.66312	9.82036	10.1987	9.95245	9.88381	9.99997	9.9829	9.4372	9.57402	9.62188	9.49676	9.53062	9.45208	9.55942	9.7758	8.45137	9.93524
A_09_P021696	euchromatic gene	10.1433	9.46475	10.3343	9.95172	10.1303	10.1055	10.2156	10.3225	10.0937	9.97218	10.1104	9.79671	9.72796	9.90311	9.71172	10.1414	9.80915	9.93758	9.97897	9.53176	10.3816
A_09_P021701	euchromatic gene	9.51868	8.54413	9.83635	9.10852	9.77782	9.78625	9.56415	9.80445	9.74534	9.62665	9.59724	9.14871	9.21375	9.3699	9.32648	9.31791	9.04823	9.43991	9.38233	8.57463	9.6955
A_09_P021706	euchromatic gene	9.49685	8.24658	9.42439	8.89461	9.70543	9.67336	9.28036	9.70753	10.082	9.65255	9.90428	9.19248	9.25801	9.51041	9.6143	9.60087	9.0655	9.52	9.50879	8.48293	9.79925
A_09_P021711	euchromatic gene	9.95242	8.38961	10.3734	9.2516	9.95619	9.92435	9.84069	9.75457	10.1697	9.87593	9.96496	9.411	9.37072	9.57269	9.52593	9.36127	9.24897	9.45165	9.51525	8.16277	9.81138
A_09_P021716	euchromatic gene	9.07328	7.54349	9.11751	8.31389	8.99419	9.06627	8.60565	8.94581	9.03526	9.04668	9.02263	8.6742	8.5816	8.8457	8.72135	8.56521	8.55278	8.72403	8.76647	7.49039	8.92081
A_09_P021721	euchromatic gene	7.88088	7.20381	8.21292	7.96676	8.08148	8.21081	8.08709	8.29015	8.08313	7.92232	8.29538	7.64882	7.73071	8.20165	8.0638	8.15588	7.9073	8.0584	7.73482	7.07892	8.01375
A_09_P021726	euchromatic gene	9.63721	8.04952	9.60085	8.45268	9.8192	9.95197	9.24902	9.57359	9.87734	9.57105	10.116	9.12517	9.13097	9.35604	9.46657	9.31426	9.29335	9.40047	9.51763	7.97822	9.76388
A_09_P021731	euchromatic gene	8.85156	7.43272	8.96839	8.38457	8.71965	8.43049	9.06225	8.89289	8.73948	8.86697	8.68015	8.61224	8.79088	8.69549	8.73204	8.45621	8.68079	8.5765	9.08063	7.77246	9.13382
A_09_P021736	euchromatic gene	9.79747	8.14539	9.68187	8.58571	9.75426	9.89516	9.79418	9.5063	9.90935	9.76029	9.95063	9.63412	9.70707	9.54382	9.7283	9.70262	9.47211	9.66302	9.80997	8.41037	10.0841
A_09_P021741	euchromatic gene	10.172	8.46084	9.90757	9.07081	9.83835	9.87978	10.302	9.83854	10.0127	10.0889	10.1153	9.8342	9.87623	9.89821	9.92916	9.55102	9.73112	9.71481	10.1893	8.78383	10.4183
A_09_P021746	euchromatic gene	10.6583	9.98012	10.4895	10.0821	10.9779	11.2549	11.7541	11.5816	11.1708	11.9563	11.2978	11.3376	11.3142	11.3874	11.1719	11.996	11.5195	11.8498	11.5301	11.1489	11.8456
A_09_P021751	euchromatic gene	9.09326	8.4206	8.51001	8.82472	9.11006	9.37049	9.29454	8.5219	9.31467	9.24255	9.52134	8.95305	9.01922	9.07335	9.1941	9.27796	9.13548	9.19673	9.03551	8.45357	9.48967
A_09_P021756	euchromatic gene	9.87096	8.32673	9.36106	8.37248	9.79596	9.8383	9.93793	9.73746	9.8962	9.64158	10.0519	9.55293	9.49638	9.55876	9.48167	9.64884	9.51337	9.35317	9.75656	8.51105	10.0151
A_09_P021761	euchromatic gene	10.1405	9.15188	10.3411	9.71902	10.5936	10.8821	9.83247	10.5759	10.6654	10.1583	10.9917	9.49569	9.32565	10.3382	10.151	10.2287	9.30367	10.0445	9.55821	8.60977	10.1553
A_09_P021766	euchromatic gene	9.17899	7.87286	9.45057	8.64777	9.35523	9.43091	9.45441	9.40874	9.5035	9.14197	9.68842	8.93061	8.9304	9.4007	9.10793	9.06177	9.01607	9.03552	9.30625	7.87459	9.4089
A_09_P021771	euchromatic gene	9.46812	8.18428	9.37248	8.59137	9.31253	9.3424	9.9962	9.50862	9.41161	9.38531	9.47665	9.33169	9.46696	9.49488	9.28399	9.19137	9.32272	9.20648	9.6302	8.43281	9.77662
A_09_P021776	euchromatic gene	8.57644	7.35596	8.94738	8.13137	8.82415	9.01103	9.08088	8.79562	9.01532	8.53231	9.18779	8.64479	8.54391	8.81228	8.9951	8.72357	8.61246	8.59037	8.81713	7.6074	9.01189
A_09_P021781	euchromatic gene	9.48163	8.11436	10.1847	9.31648	9.61163	9.49809	9.45687	9.44371	9.58095	9.39674	9.49246	9.24011	9.41857	9.22897	9.20228	9.29315	9.3222	9.25338	9.65994	8.50137	9.79607
A_09_P021786	euchromatic gene	10.3554	8.35284	10.6259	9.50495	10.1578	10.1313	10.5075	10.3108	10.2918	10.2016	10.2713	9.91546	10.0506	10.0246	10.0041	9.79839	9.90182	9.9861	10.3361	8.6418	10.5724
A_09_P021791	euchromatic gene	9.80918	8.20859	9.70544	8.68266	9.9279	9.60185	9.8267	9.68102	9.73481	9.60574	9.75803	9.31813	9.34503	9.46213	10.0581	9.19049	9.30215	9.33872	9.58842	8.42376	9.83368
A_09_P021796	euchromatic gene	10.0654	8.90659	10.1814	9.49324	10.3427	10.4459	9.61915	10.1919	10.3511	10.0843	10.485	9.09485	9.09283	9.89226	9.87388	9.69904	9.01574	9.7864	9.16247	8.59535	9.61434
A_09_P021801	euchromatic gene	8.80541	7.86676	9.00224	10.8078	8.90138	8.9422	9.05686	8.70535	8.89476	8.66539	8.9196	8.61588	8.95983	8.91236	8.95305	8.70512	8.74552	8.73783	8.65219	8.34469	9.20056
A_09_P021806	euchromatic gene	10.1255	8.13966	10.0025	8.80673	9.82517	9.76233	10.3177	9.98808	9.91236	10.0855	9.94993	9.74966	9.82899	9.80197	9.86199	9.56826	9.74756	9.69633	10.0435	8.99561	10.3365
A_09_P021811	euchromatic gene	9.54502	8.41984	10.7703	10.2545	10.4445	10.3294	10.1978	10.2186	10.2989	10.3819	10.2386	9.4191	9.48535	9.82384	9.73553	10.285	9.60668	10.3027	9.70561	9.00103	9.90354
A_09_P021816	euchromatic gene	9.90473	8.12768	10.1005	8.95812	9.82078	9.88989	10.3485	10.0719	10.0258	10.0862	10.1368	9.71965	9.7744	9.7497	9.53999	9.55318	9.63911	9.75479	10.1458	8.50174	10.3595
A_09_P021821	euchromatic gene	9.87732	8.24923	9.92281	8.96288	9.88536	10.0361	10.0175	9.67879	9.97284	9.4006	10.1209	9.73991	9.7618	9.6286	9.41363	9.40708	9.72671	9.19457	10.0266	8.4692	10.1405
A_09_P021826	euchromatic gene	10.2856	9.55144	10.3798	9.84132	10.2729	10.5143	10.2482	10.0047	10.5523	10.1879	10.693	9.89986	9.79043	9.93603	10.0163	10.0536	9.90083	10.0511	10.0512	9.33771	10.4131
A_09_P021831	euchromatic gene	9.34761	8.31047	10.5694	10.492	10.8009	10.7588	10.0854	10.2108	10.5646	9.72416	10.6271	9.6398	9.43641	9.87388	9.80488	10.072	9.67101	9.91213	9.78718	9.16603	10.1384
A_09_P021836	euchromatic gene	9.73552	8.13502	9.7207	8.84866	9.90132	9.96341	9.55893	9.54945	9.83533	9.52516	9.85544	8.86526	8.94352	9.40702	9.16469	9.34936	8.9478	9.29891	9.37365	7.9761	9.51516
A_09_P021841	euchromatic gene	9.62736	8.62768	9.82055	9.01949	9.72175	9.61228	9.75849	9.64337	9.7463	9.6106	9.74943	9.42423	9.51386	9.62096	9.63632	9.38116	9.37625	9.43086	9.65303	8.75833	9.84997
A_09_P021846	euchromatic gene	10.2095	8.67415	10.4875	9.45466	10.1726	10.1909	10.7617	10.3369	10.1866	10.2495	10.2206	10.0123	10.0115	10.0593	10.0164	9.91149	9.89435	9.98204	10.303	8.92584	10.5146
A_09_P021851	euchromatic gene	10.2441	9.99945	11.5896	11.613	12.1345	12.1284	11.3032	11.597	11.7702	11.1804	12.105	10.3839	10.1868	10.849	10.5562	11.2532	10.8242	11.0845	10.5274	10.5309	11.2316
A_09_P021856	euchromatic gene	11.191	9.89632	11.5671	10.8657	11.2764	11.3582	10.9407	11.3425	11.3214	11.1225	11.3766	10.4879	10.4281	10.9685	11.0213	10.7724	10.2843	10.8326	10.6376	9.83239	11.0765
A_09_P021861	euchromatic gene	10.1783	8.25134	9.82272	9.00506	9.97047	9.86326	10.2022	9.55695	9.96753	9.74292	10.052	9.73735	9.78925	9.65228	9.66126	9.24411	9.54626	9.62152	9.94652	8.57486	10.0311
A_09_P021866	euchromatic gene	9.15404	7.6939	9.26753	8.43447	9.08608	9.15656	8.99023	9.0086	9.18219	8.82977	9.28824	8.39377	8.52556	8.96799	8.8354	8.88794	8.43771	8.90439	8.67842	7.50592	8.93815
A_09_P021871	euchromatic gene	9.21601	7.88229	9.50424	8.51699	9.17136	9.32541	9.20896	9.36315	9.21751	9.01713	9.28123	9.00283	9.18613	8.93372	8.6781	9.09283	9.09483	9.01522	8.85969	8.01863	9.34805
A_09_P021876	euchromatic gene	9.54997	7.93562	9.78519	8.60541	9.52831	9.55267	9.6689	9.22124	9.57385	9.30054	9.86482	9.29517	9.1807	9.37198	9.39381	9.15292	9.14527	9.2139	9.47706	8.16736	9.99308
A_09_P021881	euchromatic gene	9.64529	8.53027	10.0886	9.40936	9.71248	9.77475	9.54865	9.77802	9.84873	9.59885	9.93049	9.43623	9.45022	9.60158	9.55973	9.52688	9.35352	9.42979	9.65565	8.76873	9.86537
A_09_P021886	euchromatic gene	9.92711	8.18808	10.0982	8.70962	9.87702	10.0661	10.1679	9.53225	9.92911	9.61476	10.0519	9.86159	9.87355	9.46657	9.3599	9.32243	9.72146	9.46528	10.078	8.5258	10.3563
A_09_P021891	euchromatic gene	10.2856	9.01741	10.4693	9.95408	10.6745	10.7776	10.3266	10.7707	10.7048	10.7749	10.7482	9.66408	9.73549	10.4223	10.723	10.643	9.54965	10.6583	9.89042	9.08455	10.2917
A_09_P021896	euchromatic gene	9.33482	7.74528	9.34963	8.33191	9.3912	9.16857	9.45233	9.16007	9.32777	9.23008	9.48182	8.99167	9.25612	9.05212	9.29444	8.82148	9.08273	8.93965	9.4263	8.10623	9.6376
A_09_P021901	euchromatic gene	8.5953	7.36317	9.52231	8.80587	8.64803	8.73479	8.96701	8.59998	8.65771	8.52633	8.68522	8.48794	8.57227	8.51711	8.5559	8.497	8.3193	8.55413	8.94465	7.76096	8.85562
A_09_P021911	euchromatic gene	8.54844	7.35273	9.20733	8.30506	8.57111	8.5692	8.86762	8.51287	8.72549	8.48275	8.87636	8.36948	8.68427	8.47668	8.5147	8.48201	8.51993	8.4861	8.68273	7.67232	9.00725
A_09_P021916	euchromatic gene	9.5054	8.04031	9.7469	9.16019	9.53108	9.44509	9.90116	9.32627	9.43543	9.69422	9.50329	9.43036	9.49566	9.4058	9.45942	9.33122	9.4417	9.54202	9.73435	8.42188	9.9864
A_09_P021921	euchromatic gene	9.60238	7.7479	9.854	8.97836	9.14946	9.01792	9.69032	9.51043	9.30384	9.59891	9.29335	9.30041	9.38879	9.10236	9.18853	9.18319	9.17358	9.4787	9.62974	8.22525	9.61619
A_09_P021926	euchromatic gene	10.9993	10.4011	11.4314	11.5874	11.4054	11.3957	11.8019	12.0412	11.4691	12.6003	11.6561	11.2737	11.2819	11.2617	11.4528	12.4639	11.3349	12.4017	11.302	11.2747	11.7212
A_09_P021931	euchromatic gene	9.7551	8.14093	9.99093	9.14436	10.0211	10.0359	9.91077	10.007	9.98721	9.96338	9.98716	9.45104	9.52293	9.69666	9.7077	9.67013	9.37516	9.72966	9.72983	8.49968	9.80734
A_09_P021936	euchromatic gene	10.4359	10.0721	10.2165	9.50919	9.56832	9.5352	11.398	11.508	9.48794	10.5739	9.48576	10.3464	10.4874	10.0918	10.0534	10.5291	10.2621	10.4179	10.5754	10.335	10.9669
A_09_P021941	euchromatic gene	9.57613	8.23795	9.25375	8.73198	9.42476	9.44805	9.57938	9.58838	9.48564	9.70551	9.64672	9.01328	8.94912	9.43517	9.42811	9.28561	9.23593	9.3645	9.41455	8.36317	9.45392
A_09_P021946	euchromatic gene	9.32334	7.66835	9.56358	8.71019	9.22227	9.28182	9.45275	8.99345	9.2797	8.97246	9.41229	8.93757	9.07154	9.09806	9.02936	8.87862	9.0772	8.86676	9.36974	7.96356	9.35319
A_09_P021951	euchromatic gene	8.19925	7.08629	7.9485	7.69736	8.14446	8.1665	8.20267	7.69774	8.16971	7.94083	8.23901	8.00695	8.03676	8.07865	7.90364	7.85337	8.14642	7.99485	8.30099	7.31434	7.89236
A_09_P021956	euchromatic gene	9.54242	7.98278	9.48949	8.63743	9.25347	9.16851	10.0405	9.61614	9.45162	9.53223	9.51967	9.44059	9.54378	9.34839	9.36308	9.07513	9.4722	9.20183	9.82933	8.64055	9.96767
A_09_P021961	euchromatic gene	9.93093	8.46211	10.1765	9.43821	9.91943	10.0274	9.87163	9.89627	10.0503	9.9089	10.0982	9.30435	9.38698	9.84393	9.63008	9.58906	9.29033	9.68564	9.60585	8.51741	9.68016
A_09_P021966	euchromatic gene	10.8597	9.76758	11.4812	11.067	11.2322	11.2569	10.64	10.9611	11.3448	11.1074	11.3119	10.3838	10.49	10.8132	10.9671	11.187	10.1709	11.1316	10.404	9.67921	10.5859
A_09_P021971	euchromatic gene	8.91981	7.57871	9.53691	8.62741	9.1757	8.83115	9.00401	8.80979	8.92162	8.74085	9.06215	8.60157	8.72921	8.69923	8.78716	8.40524	8.75135	8.6328	8.92839	7.82571	8.94221
A_09_P021976	euchromatic gene	8.28561	7.17544	8.01971	7.83656	8.00741	7.79089	8.49983	7.898	7.81304	8.07874	7.91912	7.9764	8.25606	8.0899	8.1139	7.79928	8.11111	8.10315	8.23353	7.4253	8.15352
A_09_P021981	euchromatic gene	10.9075	10.2715	11.1045	10.9202	11.4999	11.4417	10.7565	11.5675	11.3381	11.2342	11.3169	9.88323	9.83709	10.9401	10.9261	11.2755	9.89104	11.3022	10.0012	9.89844	10.6932
A_09_P021986	euchromatic gene	9.90652	8.10718	9.6668	8.58837	9.53733	9.5052	10.1763	9.75589	9.63388	9.96143	9.72885	9.70389	9.84343	9.75942	10.018	9.69277	9.63828	9.7883	9.96034	8.4663	10.0303
A_09_P021991	euchromatic gene	9.59659	7.87713	9.41212	8.57914	9.59171	9.47469	9.64606	9.41345	9.73761	9.57853	9.65757	9.17796	9.1639	9.43432	9.309	9.34139	9.11643	9.22852	9.43424	7.99101	9.34616
A_09_P021996	euchromatic gene	11.14	10.4801	11.7775	11.3954	11.8514	11.9882	11.7897	11.7587	12.0926	11.9197	12.2811	11.0461	10.9848	11.6064	11.9522	12.1846	10.8834	11.9312	10.8796	10.7253	11.5192
A_09_P022001	euchromatic gene	9.21155	7.69049	9.75016	8.69411	9.18124	9.26221	9.70086	9.17434	9.12376	9.35384	9.28171	9.02572	9.12281	9.07172	9.04055	9.10131	9.18708	9.15081	9.23615	8.00695	9.29707
A_09_P022006	euchromatic gene	10.8981	9.732	11.3085	10.6951	10.9749	10.9721	11.3127	11.1553	11.1422	11.0976	11.2386	10.814	10.8809	10.9992	11.1154	10.8892	10.8066	10.8711	11.0609	10.2809	11.3003
A_09_P022011	euchromatic gene	8.19709	7.18916	8.26946	7.87475	7.80446	7.76289	8.32446	7.84533	7.78797	7.74868	7.68895	7.86527	8.04316	7.99244	7.81074	7.80952	7.99081	7.82519	8.14127	7.21414	8.14028
A_09_P022016	euchromatic gene	9.79867	8.08839	10.0073	8.89061	9.79801	9.96327	10.1877	9.82717	9.95781	9.79811	10.0071	9.62322	9.64605	9.6557	9.51776	9.53343	9.57935	9.54014	9.92901	8.36771	9.94172
A_09_P022021	euchromatic gene	8.6271	7.42102	9.11758	8.39096	8.99177	8.94475	9.55546	8.94735	8.89442	8.78725	8.94282	8.76948	8.82803	8.89103	8.81971	8.91323	8.75268	8.68337	8.9604	7.75649	9.01053
A_09_P022031	euchromatic gene	6.30037	6.28342	7.32314	7.23259	7.45284	7.55361	7.99148	7.91564	8.03728	7.98599	8.07489	7.23631	7.4335	7.56055	7.73409	7.91799	7.27399	7.74231	7.87244	6.27299	7.57459
A_09_P022036	euchromatic gene	9.33134	8.03163	9.3108	8.65399	9.12113	9.20395	9.60457	9.3394	9.26645	9.47048	9.31284	9.14014	9.1637	9.38063	9.42503	9.13568	9.03703	9.37326	9.3075	8.21312	9.31399
A_09_P022041	euchromatic gene	8.43167	7.56285	9.2162	8.43149	8.42486	8.64872	8.90429	8.51744	8.56743	8.38597	8.66077	8.58364	8.68044	8.47846	8.54232	8.38389	8.67866	8.33418	8.93024	7.76846	8.91414
A_09_P022046	euchromatic gene	9.51025	7.78846	9.84181	8.68894	9.51077	9.51859	10.0989	9.43571	9.69216	9.57159	9.84806	9.40888	9.46181	9.37004	9.46219	9.21621	9.30222	9.30051	9.5222	8.16012	9.57964
A_09_P022051	euchromatic gene	9.76759	8.30522	9.62493	8.88379	9.68575	9.65997	10.21	9.95728	9.74435	9.88711	9.74367	9.73266	9.76739	9.73624	9.71132	9.67771	9.69036	9.6804	10.0144	8.74055	10.1118
A_09_P022056	euchromatic gene	10.9349	9.62114	10.758	9.71572	10.7343	10.6849	11.4825	11.0725	10.8591	11.2458	10.8724	10.8742	10.7761	10.8329	10.8696	10.9375	10.658	10.8376	10.9924	10.0183	11.2832
A_09_P022061	euchromatic gene	9.52066	8.05962	9.50653	8.74678	9.74931	9.86125	9.39387	9.24499	9.43811	9.28825	9.6777	9.29456	8.93224	9.26775	8.87187	9.2036	8.94464	9.27441	9.24499	7.92973	9.34399
A_09_P022066	euchromatic gene	9.26723	8.07219	9.73833	8.8368	9.65458	9.77925	9.68234	9.51329	9.52942	9.284	9.6797	9.4712	9.1974	9.37172	9.12587	9.28488	9.2001	9.16788	9.55047	8.3751	9.58492
A_09_P022071	euchromatic gene	9.718	8.11398	9.52583	8.54897	9.47942	9.46234	9.88265	9.54648	9.5298	9.67369	9.58974	9.57718	9.51734	9.52313	9.52722	9.15111	9.37799	9.21591	9.64691	8.55076	9.79634
A_09_P022076	euchromatic gene	9.03471	8.01677	9.27889	8.56439	9.03971	9.07485	9.34067	8.84954	9.09126	8.80439	9.13173	8.8095	8.89365	8.86625	8.86417	8.62916	8.80644	8.7423	8.98183	8.14062	9.09118
A_09_P022081	euchromatic gene	9.2513	7.74486	9.92017	9.12309	9.13321	9.25509	9.39313	9.14909	9.26579	9.2647	9.18628	9.08497	9.01397	9.05797	9.02063	8.71654	9.09291	8.99143	9.58049	7.99443	9.06025
A_09_P022086	euchromatic gene	9.68064	8.38115	9.69919	8.94575	9.61118	9.6319	9.79274	9.54294	9.78492	9.59848	9.74295	9.36862	9.44425	9.43677	9.48874	9.37517	9.28617	9.33917	9.52448	8.54439	9.58405
A_09_P022091	euchromatic gene	9.91746	8.71786	9.76739	8.83032	9.768	9.63827	10.0363	9.70318	9.93013	9.881	9.92962	9.43944	9.68945	9.57064	9.83296	9.42352	9.52169	9.6583	9.85512	8.65264	9.88185
A_09_P022096	euchromatic gene	10.0829	9.10327	10.7479	10.2354	10.8908	10.802	10.3322	10.6509	10.5894	10.5205	10.8447	9.70528	9.72345	10.085	10.1036	10.7445	9.54587	10.4301	10.0115	9.04932	10.3253
A_09_P022101	euchromatic gene	8.85979	7.75933	8.62367	8.24651	8.77706	8.78369	9.01096	8.99457	8.97028	8.94863	8.97923	8.47898	8.56948	9.05549	8.93802	8.58665	8.48725	8.70173	8.73116	7.74258	8.84248
A_09_P022106	euchromatic gene	9.09606	8.14943	9.41509	8.81696	9.21032	9.08213	9.4724	9.19796	9.16498	9.13027	9.2867	8.69952	9.05577	8.98955	9.08642	8.8405	9.04798	8.96854	9.25424	8.30705	9.4698
A_09_P022111	euchromatic gene	9.6829	7.99518	9.63772	8.55141	9.5573	9.47782	9.76184	9.46496	9.37395	9.39703	9.75246	9.26274	9.41242	9.20144	9.26501	9.2025	9.35266	9.24749	9.73581	8.33886	9.68437
A_09_P022116	euchromatic gene	9.83396	8.24893	9.84126	8.85583	9.88039	9.72581	10.1027	9.83857	9.90148	9.93756	9.99417	9.59754	9.65151	9.63635	9.87705	9.66977	9.60795	9.59724	9.96165	8.72593	10.0588
A_09_P022121	euchromatic gene	9.82908	8.08548	10.1539	9.20837	9.7553	9.81816	10.2059	9.73869	9.82845	9.84134	9.86973	9.43246	9.58594	9.64933	9.56598	9.53743	9.5472	9.55394	9.92119	8.44028	9.89108
A_09_P022126	euchromatic gene	10.9033	10.8918	10.6344	10.2178	10.4016	10.5808	9.48043	10.153	10.5554	9.93725	10.4985	9.09639	9.2297	9.81771	9.7628	10.1576	9.25559	9.80862	9.42873	9.15907	9.66728
A_09_P022136	euchromatic gene	9.86967	8.20698	9.7934	8.62565	10.0849	10.1526	10.5211	10.119	10.3106	10.1476	10.4389	9.59278	9.62062	9.819	9.75371	9.89152	9.50385	9.9227	9.8118	8.51836	9.94233
A_09_P022141	euchromatic gene	8.63946	7.49054	8.36954	7.83285	8.64792	8.73885	9.23128	8.78734	8.71956	8.82051	8.88371	8.48502	8.69769	8.67825	8.60102	8.67824	8.6254	8.69799	8.63343	7.6586	8.84777
A_09_P022146	euchromatic gene	9.27877	7.89262	9.72292	8.72479	9.12218	9.23872	9.56759	9.171	9.13602	9.11055	9.3567	9.15415	9.28542	9.022	8.88566	9.00535	9.17284	9.05029	9.5383	8.22897	9.54459
A_09_P022151	euchromatic gene	9.40145	7.80877	8.8971	8.07429	9.19427	8.96446	9.49295	9.28081	9.14148	9.4783	9.23771	8.92258	9.07225	9.10994	9.16665	9.06527	8.91242	9.32441	9.17161	7.96318	9.40218
A_09_P022156	euchromatic gene	9.16518	7.60756	9.12187	8.44588	9.36189	9.3243	9.56176	9.07394	9.39498	9.13946	9.4564	8.84131	9.04084	9.69116	8.83237	8.83248	8.99199	8.96866	9.17457	8.15068	9.25093
A_09_P022161	euchromatic gene	10.0692	8.22307	10.1803	8.96781	10.1189	10.1813	10.2062	10.2182	10.2873	10.0535	10.4308	9.37509	9.46075	9.81247	9.63806	9.74751	9.41112	9.81339	9.81289	8.237	9.79283
A_09_P022166	euchromatic gene	8.59457	7.38456	8.84198	8.21996	8.73275	8.51561	8.83552	8.42071	8.57569	8.53089	8.62065	8.35511	8.598	8.55498	8.5165	8.5014	8.46501	8.43526	8.76065	7.63034	8.74708
A_09_P022171	euchromatic gene	8.24175	7.21303	8.77365	7.94074	8.63025	8.60619	8.59705	8.39208	8.68607	8.38404	8.63493	8.19101	8.45692	8.26283	8.15564	8.16991	8.39076	8.19115	8.68938	7.5717	8.65219
A_09_P022176	euchromatic gene	10.6294	9.69817	10.8784	10.6824	10.4411	10.4054	10.6866	10.7735	10.6498	10.9211	10.7313	10.4218	10.5063	10.5912	10.7299	10.6521	10.3451	10.5146	10.5801	9.96638	10.731
A_09_P022181	euchromatic gene	10.3562	8.62012	10.2124	8.98986	10.243	10.3082	10.697	10.5215	10.4537	10.4701	10.5907	10.1645	10.2053	10.3305	10.4929	10.1533	10.039	10.2294	10.5245	8.91686	10.6805
A_09_P022186	euchromatic gene	9.68101	8.13318	10.0873	9.04564	9.64192	9.73692	9.51325	9.63711	9.72912	9.45693	9.91869	9.13605	9.00056	9.53345	9.4273	9.39203	9.12528	9.35174	9.54504	8.11262	9.64285
A_09_P022191	euchromatic gene	9.91107	8.5494	10.011	9.56812	9.78407	9.74462	10.0712	9.76627	9.84713	10.0123	9.91025	9.38907	9.52728	9.74529	9.60768	9.76043	9.44277	9.86624	9.65407	8.77246	9.80978
A_09_P022196	euchromatic gene	9.67316	8.36124	9.58649	9.07925	9.71064	9.79606	9.60895	9.75567	9.89648	9.67076	9.99957	9.13686	9.18453	9.67803	9.67504	9.37064	9.13673	9.39751	9.34802	8.3667	9.44296
A_09_P022206	euchromatic gene	9.45776	7.83842	9.1766	8.26043	9.33199	9.24762	9.49648	9.14755	9.52952	9.41785	9.62547	8.92265	9.0362	9.36074	9.25243	9.29317	8.90002	9.2064	9.13473	7.93331	9.38217
A_09_P022211	euchromatic gene	10.4095	9.02251	10.6614	10.0599	10.6742	10.8314	10.8413	10.4585	10.8324	10.5497	10.8548	10.2518	10.2415	10.5187	10.2335	10.3388	10.2029	10.3529	10.5582	9.49035	10.616
A_09_P022216	euchromatic gene	9.66301	8.05706	9.77622	8.74051	9.647	9.77497	10.1609	9.98956	9.86239	9.92892	9.97604	9.41711	9.57415	9.62602	9.47612	9.41031	9.43084	9.56409	9.73564	8.26543	9.84855
A_09_P022221	euchromatic gene	10.0454	8.43748	10.7616	9.4596	10.397	10.2663	10.1483	10.1313	10.35	10.0561	10.3737	9.67888	9.68552	9.81983	9.99854	9.75637	9.55097	9.69784	10.0688	8.46105	10.0706
A_09_P022226	euchromatic gene	10.2104	8.4571	9.93241	8.87421	10.05	10.1827	10.0326	10.247	10.2949	10.4056	10.4251	9.45799	9.4623	10.3341	10.3337	10.1536	9.29607	10.2124	9.55859	7.99934	9.76635
A_09_P022231	euchromatic gene	9.53609	8.40162	9.82133	9.03857	9.64588	9.66991	9.4437	9.6128	9.61075	9.68598	9.79983	8.87686	9.02014	9.73315	9.5277	9.32244	8.94747	9.63054	9.28324	8.15264	9.41355
A_09_P022236	euchromatic gene	9.14093	7.80679	8.9766	8.55705	8.83221	8.76487	9.51589	9.05288	8.82403	9.03918	8.8207	8.95488	9.26659	8.89233	8.92574	8.85049	8.94135	8.92523	9.30235	8.12735	9.14226
A_09_P022241	euchromatic gene	9.66362	8.19191	10.4677	9.41718	9.80974	10.0172	9.78129	9.74678	9.92117	9.57195	10.1004	9.53417	9.42772	9.56141	9.37743	9.47529	9.47632	9.4399	9.90497	8.60656	9.83381
A_09_P022246	euchromatic gene	9.27596	8.21062	10.2186	9.26661	9.36725	9.3941	9.58743	9.49225	9.48541	9.4617	9.511	9.12754	9.29633	9.32068	9.30669	9.26466	9.19058	9.34743	9.60553	8.21739	9.61245
A_09_P022251	euchromatic gene	7.88104	7.06449	8.32911	7.8195	7.89787	7.62556	8.34924	7.63615	7.78316	7.63034	7.86631	7.83458	7.9007	7.83482	7.76982	7.51546	7.88901	7.78881	7.91664	7.18082	7.86719
A_09_P022256	euchromatic gene	9.44398	8.237	9.34287	8.24225	9.41998	9.34298	9.18097	9.39832	9.37901	9.29072	9.55995	8.65113	8.79533	9.39114	9.16592	9.10373	8.79686	9.21623	9.00141	7.86949	9.12781
A_09_P022261	euchromatic gene	9.83331	9.03982	10.6579	10.2811	10.5839	10.7095	9.89627	10.2109	10.4978	9.94298	10.6929	9.92263	9.50358	9.87797	9.98328	10.3242	9.74961	10.0249	9.82545	9.24785	10.0025
A_09_P022266	euchromatic gene	9.98315	8.03413	8.92309	8.70226	9.82781	9.69029	9.40302	9.78424	9.80631	9.53418	9.09554	8.70754	9.69734	9.79659	9.88256	9.58489	9.45588	9.18529	9.83434	8.30212	9.58641
A_09_P022271	euchromatic gene	9.53862	8.13494	9.47784	8.6968	9.66915	9.74488	10.1733	10.0856	9.7017	9.82608	9.76672	9.24772	9.38373	9.59536	9.36303	9.64183	9.31761	9.54394	9.7076	8.57507	9.66403
A_09_P022276	euchromatic gene	9.26357	7.89603	9.73571	8.75922	9.5374	9.80369	9.80269	9.57602	9.59151	9.3744	9.78063	9.077	9.02185	9.43502	9.39305	9.5142	9.21758	9.27725	9.25696	8.0859	9.33062
A_09_P022281	euchromatic gene	9.85092	8.71905	9.82643	9.09173	9.55403	9.73575	9.78324	9.83858	9.75737	9.63452	9.93773	9.3348	9.36641	9.54467	9.5683	9.63421	9.42308	9.61767	9.76242	8.79906	9.81455
A_09_P022286	euchromatic gene	9.19739	7.83893	9.52945	8.84967	9.01675	8.90477	9.66231	9.12967	8.99337	9.20896	9.02168	9.02848	9.22281	9.09214	8.97626	9.01897	9.12521	9.06574	9.41289	8.21378	9.37483
A_09_P022291	euchromatic gene	9.54412	8.44525	9.65338	8.89337	9.40676	9.60887	9.5955	9.74995	9.6312	9.67233	9.72232	9.15377	9.36951	9.45589	9.47075	9.5646	9.10595	9.59087	9.51326	8.34637	9.48237
A_09_P022296	euchromatic gene	9.88331	8.23391	10.0636	8.95885	9.95035	9.85147	10.0639	9.8988	10.0233	9.9706	10.1201	9.39493	9.54456	9.73485	9.87473	9.54261	9.47986	9.83645	9.61397	8.3798	9.85285
A_09_P022301	euchromatic gene	8.96977	7.56961	9.35145	8.52167	9.4733	9.44893	9.57345	9.06261	9.28115	9.15842	9.47278	8.8023	8.98572	9.20196	8.88242	8.99507	8.93771	8.85871	9.12055	7.9086	9.16973
A_09_P022306	euchromatic gene	10.415	8.83186	10.6189	9.41544	10.269	10.2202	10.4631	10.3837	10.4299	10.3114	10.6335	10.026	10.1259	10.049	10.1755	9.95187	10.0229	10.0887	10.4638	8.99417	10.4507
A_09_P022311	euchromatic gene	9.59174	7.99321	9.55359	8.68712	9.42395	9.27023	9.84222	9.441	9.405	9.52439	9.59885	9.304	9.5565	9.27759	9.3785	9.06038	9.38118	9.32595	9.66687	8.35497	9.73439
A_09_P022316	euchromatic gene	8.14936	7.1807	8.2938	7.75178	8.41768	8.43811	8.58632	8.35462	8.15273	8.3207	8.53883	8.19077	8.33996	8.34323	8.30133	8.35873	8.2877	8.20828	8.4747	7.60816	8.15188
A_09_P022321	euchromatic gene	8.73582	7.80072	9.11938	8.75957	8.84374	8.90757	9.07093	8.82186	8.8871	8.92815	8.91656	8.68476	8.92562	8.77193	8.81154	8.7994	8.71751	8.86312	9.13579	8.04444	8.95628
A_09_P022326	euchromatic gene	8.99974	7.59619	8.72244	8.46464	9.00261	8.93601	9.40734	9.1832	9.07566	9.09818	9.01432	8.56985	8.64785	8.92806	9.03368	8.97447	8.59641	8.97991	8.78082	7.91921	8.7818
A_09_P022331	euchromatic gene	10.3262	8.66969	10.4218	9.17592	10.4483	10.3437	10.8943	10.4754	10.3146	10.5268	10.5194	10.2115	10.2291	10.046	10.1343	10.1576	10.1369	10.2341	10.323	9.38107	10.5744
A_09_P022336	euchromatic gene	9.21706	7.87125	9.55194	9.06205	9.39897	9.53032	9.59306	9.35861	9.5041	9.23329	9.68399	9.11113	9.31793	9.36265	9.25056	9.29807	9.32892	9.0679	9.5782	8.77468	9.62143
A_09_P022341	euchromatic gene	9.61768	7.99928	9.48399	8.45597	9.58288	9.5231	10.1733	9.64939	9.61979	9.81979	9.658	9.4161	9.59388	9.64814	9.65296	9.46878	9.38986	9.49257	10.1386	8.4122	9.76824
A_09_P022346	euchromatic gene	9.70875	7.96919	10.3883	9.1525	9.8455	9.67655	9.98542	9.62589	9.64293	9.51051	9.75002	9.44501	9.57834	9.46808	9.48679	9.39669	9.4194	9.47643	9.89391	8.40477	9.94956
A_09_P022351	euchromatic gene	8.62719	7.40802	8.69451	8.14693	8.59846	8.46929	8.97206	8.5794	8.64619	8.65286	8.60974	8.5947	8.68463	8.60319	8.5214	8.38346	8.57443	8.47004	8.83254	7.70274	8.79982
A_09_P022356	euchromatic gene	8.96077	7.73794	9.63733	8.47505	8.99184	8.92144	9.33729	8.88537	8.93292	8.8457	9.04116	8.856	8.93925	8.7345	9.06468	8.70161	8.83045	8.81664	9.08841	7.93402	9.18238
A_09_P022361	euchromatic gene	9.68176	8.09266	9.77816	8.90252	9.58789	9.66506	10.0779	9.57178	9.79372	9.75478	9.83038	9.41654	9.51711	9.61564	9.48938	9.38495	9.41254	9.58818	9.73098	8.41327	9.8539
A_09_P022366	euchromatic gene	9.8107	8.0455	9.82517	8.8723	9.68831	9.60396	10.1521	9.86622	9.76806	9.99544	9.69432	9.58142	9.5029	9.48499	9.73026	9.54615	9.46864	9.722	9.93256	8.44612	9.97337
A_09_P022371	euchromatic gene	9.20282	7.71633	9.17576	8.44617	8.91569	8.93819	9.67624	9.38375	9.05112	9.29265	9.20331	9.01618	9.11719	9.02061	8.9654	9.13379	8.97005	9.01013	9.19449	8.08969	9.35245
A_09_P022376	euchromatic gene	10.0856	8.20554	9.6827	9.12399	9.74309	9.58892	10.1183	9.93189	9.81277	9.92486	9.83826	9.345	9.48601	9.75042	9.45912	9.21945	9.41984	9.61923	9.96326	8.54923	10.2008
A_09_P022381	euchromatic gene	8.41481	7.37735	9.22126	8.51197	8.29807	8.19197	8.63166	8.43032	8.33575	8.38084	8.26922	8.13079	8.34916	8.30663	8.30503	8.30426	8.2911	8.41015	8.64031	7.46807	8.49216
A_09_P022386	euchromatic gene	10.1564	8.94825	10.1145	9.36144	10.0286	10.2481	10.1279	10.0001	10.1259	9.88463	10.2653	9.89809	9.61705	9.91516	9.68435	9.55408	9.45333	9.65562	9.87781	9.15546	10.0267
A_09_P022391	euchromatic gene	11.4443	9.66934	11.792	10.9164	11.2723	11.4535	11.6749	11.6002	11.5367	11.5484	11.6581	11.1665	11.135	11.3467	11.5598	11.4371	10.9601	11.3389	11.3989	9.96995	11.4935
A_09_P022396	euchromatic gene	9.46705	8.04989	9.85837	8.60956	9.04704	9.15631	9.66263	8.88895	9.65856	9.09603	9.2452	8.56234	9.37165	8.76538	8.75878	9.05921	9.1253	8.96364	9.3878	8.21101	9.45294
A_09_P022401	euchromatic gene	9.15398	7.68764	8.93089	8.34507	8.93132	8.80693	9.56301	9.02314	8.84442	9.10231	8.94644	8.88198	9.02362	9.04455	8.92694	8.81491	8.9988	8.84758	9.30921	7.98962	9.13798
A_09_P022406	euchromatic gene	9.00102	8.07535	9.21498	8.64327	9.29574	9.1329	9.28916	9.05647	9.21806	9.03639	9.2095	9.02087	9.02897	8.92912	8.91459	8.85122	8.98693	8.91338	9.00314	8.54091	9.18481
A_09_P022411	euchromatic gene	9.51391	7.86241	10.0434	9.23585	9.32787	9.2377	9.53295	9.33591	9.36528	9.54101	9.38612	9.05325	9.24517	9.31079	9.35886	9.14931	9.15239	9.3954	9.46437	8.10624	9.48726
A_09_P022416	euchromatic gene	8.81501	7.72952	8.74134	8.20007	8.69213	8.67585	8.94453	8.74072	8.62772	8.78226	8.59522	8.3431	8.47634	8.64904	8.42316	8.47356	8.49888	8.59239	8.69036	7.51492	8.78324
A_09_P022421	euchromatic gene	8.90915	7.55272	9.14205	8.24507	8.99734	8.9856	9.3809	8.91056	9.04423	8.95521	9.07715	8.92336	9.03804	8.82951	8.84725	8.61239	8.89867	8.78004	9.12895	7.82798	9.09308
A_09_P022426	euchromatic gene	9.27381	7.93553	9.38902	8.67453	9.24768	9.10991	9.47563	9.0019	9.26928	9.13264	9.28217	9.13701	9.03353	8.95544	8.90072	8.8424	8.91494	8.91748	9.13104	8.50406	9.31273
A_09_P022431	euchromatic gene	9.25177	7.83043	9.68794	8.6372	9.32166	9.42291	9.66861	9.30809	9.46877	9.19133	9.61603	9.14178	9.23932	9.246	9.06317	8.97707	9.17824	9.10964	9.47463	8.14346	9.51661
A_09_P022436	euchromatic gene	9.30567	7.78422	9.49288	8.61771	9.3357	9.26027	9.8314	9.41284	9.41644	9.39962	9.48581	9.22434	9.36953	9.29449	9.35111	9.01945	9.25068	9.18973	9.51652	8.22603	9.61204
A_09_P022441	euchromatic gene	10.0804	8.17232	10.4411	8.94705	9.92169	9.86272	10.3231	9.89672	10.1023	9.93636	10.0187	9.78664	9.7146	9.63319	9.64672	9.46606	9.7184	9.60242	10.0893	8.54133	10.0352
A_09_P022446	euchromatic gene	9.71594	8.09682	9.9734	8.83108	9.57155	9.69787	9.74841	9.61884	9.82323	9.40945	9.9584	9.38083	9.36206	9.42717	9.50665	9.25268	9.35047	9.34596	9.67473	8.29026	9.62623
A_09_P022451	euchromatic gene	9.11241	7.74028	9.43151	8.28425	9.19495	9.41399	9.74275	9.21423	9.27185	9.18159	9.47846	9.21945	9.10248	8.9276	8.93187	8.77769	9.10897	8.93181	9.4213	8.10208	9.37855
A_09_P022456	euchromatic gene	9.03036	7.83113	9.31947	8.43476	8.96006	9.04853	9.28267	8.97442	8.96397	8.87389	9.20263	8.87608	8.90662	8.89001	8.87551	8.7955	8.85461	8.80835	9.17688	8.08403	9.25007
A_09_P022461	euchromatic gene	9.52125	7.88832	9.48384	8.64403	9.27433	9.32857	9.64895	8.57633	9.4839	9.16282	9.20105	9.1966	9.32728	9.21922	9.18886	9.00057	9.23761	9.12888	9.58812	8.0758	9.50353
A_09_P022466	euchromatic gene	8.83161	7.3711	8.76149	8.23272	8.48586	8.30352	8.94711	8.6942	8.76627	8.74004	8.52307	8.5247	8.5664	8.68572	8.47066	8.36646	8.55162	8.54692	8.6946	7.98671	8.83035
A_09_P022471	euchromatic gene	8.2773	7.09517	8.44545	7.99788	8.14231	8.03776	8.31194	8.02688	7.99459	7.97274	8.05926	7.86014	8.15131	7.86099	7.6687	7.96233	8.12619	8.08398	8.27718	7.31592	8.29559
A_09_P022476	euchromatic gene	9.41447	7.79979	9.8992	8.58245	9.39546	9.1962	9.56745	9.26992	9.50552	9.27936	9.61469	9.0918	9.21189	9.01767	9.35323	8.99348	9.08453	9.13719	9.31961	8.10424	9.38428
A_09_P022481	euchromatic gene	9.22103	7.79533	8.90418	8.19356	8.96011	8.82241	9.47366	9.04055	8.95984	9.15874	9.02293	8.8567	9.08059	9.1419	9.02115	8.7473	8.95037	8.86856	9.1865	8.20373	9.07799
A_09_P022486	euchromatic gene	9.75274	8.00262	9.90673	8.74987	9.5206	9.55013	9.60416	9.85371	9.65464	9.7302	9.69543	9.12378	9.30087	9.28784	9.43728	9.55446	9.19803	9.47968	9.48951	8.33287	9.46572
A_09_P022491	euchromatic gene	8.95187	7.79673	9.55225	8.66947	8.79878	9.04127	9.3932	9.02465	9.03102	8.68883	9.28314	9.09818	9.22656	8.81991	8.80304	8.80591	9.10065	8.72781	9.36923	8.01345	9.29215
A_09_P022496	euchromatic gene	9.57637	8.15504	9.57895	9.07564	9.56196	9.61091	9.53596	9.60411	9.52256	8.96191	9.77998	9.34535	9.32545	9.32981	9.32658	9.44067	9.21869	9.25713	9.43349	8.56117	9.56276
A_09_P022501	euchromatic gene	8.61708	7.4208	7.80003	8.03679	8.74588	8.68335	8.92045	8.47976	8.82356	8.52363	8.88206	8.43193	8.6047	8.55993	8.83667	8.44545	8.54261	8.47519	8.72327	7.63765	8.77159
A_09_P022506	euchromatic gene	9.44109	7.85221	9.2359	8.51554	9.06036	9.07814	9.6888	9.16071	9.25285	9.27599	9.33054	8.99542	9.26502	9.24293	8.8544	8.9986	9.1715	9.19099	9.5074	8.19759	9.55002
A_09_P022511	euchromatic gene	10.6292	8.72083	10.975	9.42664	10.4612	10.7905	10.7239	10.5135	10.8186	10.561	11.1504	10.3341	10.1199	10.5434	10.6698	10.1728	9.99698	10.2726	10.3571	8.79289	10.4144
A_09_P022516	euchromatic gene	9.79806	8.21082	9.76699	8.60808	10.154	9.99471	9.87355	9.86361	9.94065	9.93241	10.0871	9.20135	9.38946	9.71405	9.81224	9.74629	9.21031	9.71008	9.45465	8.23362	9.62381
A_09_P022521	euchromatic gene	10.3583	8.84982	10.4526	9.25298	10.3292	10.5129	10.5593	10.4797	10.5651	10.3238	10.7793	10.1474	10.1276	10.2914	10.2553	10.1356	10.0181	10.1091	10.4508	9.01148	10.4401
A_09_P022526	euchromatic gene	8.77929	7.39598	8.72019	8.08618	8.70693	8.60189	9.39325	8.71043	8.58872	8.37959	8.88973	8.64775	8.74357	8.78558	8.57076	8.57391	8.65323	8.69227	8.82637	7.60895	8.80265
A_09_P022531	euchromatic gene	9.68038	7.99186	9.88117	8.78441	9.72501	9.76601	10.0778	9.70164	9.93286	9.73057	10.0228	9.49905	9.59794	9.53511	9.62587	9.31964	9.45818	9.41718	9.87067	8.35999	9.92593
A_09_P022536	euchromatic gene	9.757	8.15635	9.77972	8.63711	9.52655	9.29703	9.66943	9.40655	9.6928	9.37145	9.84333	9.13667	9.37818	9.21669	9.21479	8.92786	9.16457	9.15049	9.60775	8.40339	9.67602
A_09_P022541	euchromatic gene	9.06548	7.56541	9.08474	8.46404	8.9293	8.85496	9.46467	8.86779	8.88386	8.92365	8.95306	8.7773	8.96121	8.91413	8.81465	8.8184	8.87773	8.8359	9.12932	7.89951	9.04667
A_09_P022546	euchromatic gene	9.99479	8.37212	10.5291	9.33594	9.73322	9.65715	10.2657	9.73893	9.90674	9.74056	9.97037	9.8385	9.70673	9.69172	9.71221	9.48442	9.61789	9.55247	10.0059	8.76869	10.051
A_09_P022551	euchromatic gene	9.72034	8.21559	9.75996	8.84243	10.0856	10.2238	9.87935	9.99169	10.1551	9.7986	10.3019	9.11996	9.13285	9.80968	9.59198	9.78415	9.18665	9.55327	9.38728	8.0653	9.55201
A_09_P022556	euchromatic gene	8.63244	7.6121	9.32744	8.57676	8.85215	8.9546	9.11535	8.79756	8.8875	8.69612	9.05114	8.72235	8.86675	8.60843	8.57282	8.65495	8.73903	8.77425	9.05253	8.09786	9.10583
A_09_P022561	euchromatic gene	9.94297	8.33128	10.0591	8.90097	10.0354	10.1519	9.51617	9.94987	10.1319	9.82007	10.1821	9.50985	9.49473	9.64766	9.61548	9.60355	9.49251	9.46926	9.8756	8.53687	9.98694
A_09_P022566	euchromatic gene	8.43589	7.68093	8.57994	8.17455	8.39417	8.47893	8.92031	8.70082	8.42348	8.32407	8.43105	8.66456	8.5974	8.60417	8.39467	8.46189	8.63183	8.47515	8.87515	8.04689	8.82012
A_09_P022571	euchromatic gene	9.31652	7.87704	9.2699	8.61836	9.5328	9.55005	9.53358	9.42115	9.58	9.39758	9.57996	9.01366	9.11157	9.18624	9.12672	9.12651	8.99807	9.10966	9.28599	8.11524	9.31704
A_09_P022576	euchromatic gene	8.84369	8.09509	8.84594	8.47716	8.74547	8.72144	9.19276	8.94212	8.8232	9.0053	8.87297	8.85629	8.84308	9.10683	8.88934	9.00121	8.73006	9.03547	9.07099	8.19261	9.25854
A_09_P022581	euchromatic gene	10.3822	8.68761	10.7896	9.70135	10.3332	10.4335	10.2302	10.3281	10.531	10.2938	10.6705	9.6227	9.61115	10.2981	10.1431	9.96887	9.44807	10.1518	9.84926	8.39365	9.95021
A_09_P022586	euchromatic gene	9.9471	8.14911	9.89636	8.46109	9.82444	10.1532	9.99673	9.8549	10.1421	9.86107	10.305	9.68691	9.47923	9.7595	9.57817	9.40119	9.63135	9.68413	9.9889	8.24895	9.83944
A_09_P022591	euchromatic gene	9.60797	8.0331	10.0509	8.77478	9.92471	9.81929	9.88854	9.69631	9.81736	9.60063	9.94569	9.40324	9.51959	9.38584	9.49862	9.37566	9.41947	9.42121	9.8612	8.50366	9.90522
A_09_P022596	euchromatic gene	10.4417	8.47635	10.6833	9.27502	10.4576	10.5972	10.821	10.8312	10.7445	10.7589	10.9123	10.019	10.0386	10.3178	10.1978	10.2807	9.92265	10.3828	10.282	8.67905	10.4127
A_09_P022601	euchromatic gene	9.45355	7.93522	10.0307	8.86518	9.46273	9.60428	9.7496	9.46598	9.6065	9.36368	9.63973	9.21441	9.28074	9.36985	9.38182	9.26717	9.26342	9.21535	9.62587	8.05553	9.50008
A_09_P022606	euchromatic gene	10.1195	8.31396	10.1954	9.08551	9.94623	10.0194	10.3231	9.92332	10.1587	9.92994	10.2727	9.77755	9.85489	9.79135	9.5971	9.57781	9.69897	9.7177	10.1371	8.54035	10.1549
A_09_P022611	euchromatic gene	8.15263	7.23033	8.64663	7.89943	8.26086	8.05887	8.7542	8.22369	8.60282	8.42594	8.13829	7.93325	8.31013	8.35748	8.36185	8.26272	8.22126	8.21611	8.43577	7.50899	8.42088
A_09_P022616	euchromatic gene	9.40187	7.85632	9.82695	8.8416	9.44906	9.73024	9.82068	9.43618	9.56421	9.33095	9.74113	9.14277	9.18525	9.29884	9.21456	9.16613	9.23137	9.09826	9.48041	8.14832	9.52486
A_09_P022621	euchromatic gene	10.198	8.68303	10.8066	9.82768	10.4396	10.5934	10.4781	10.2575	10.4426	10.2917	10.6635	9.9098	9.90727	10.1034	10.0001	10.1488	10.028	10.1982	10.3776	8.95592	10.3514
A_09_P022626	euchromatic gene	9.33267	7.73101	9.90014	8.92574	9.60605	9.82005	9.77329	9.28727	9.49671	9.26049	9.48071	9.01777	9.24798	9.12524	8.99467	9.22364	9.16144	9.10359	9.49506	8.12703	9.33743
A_09_P022631	euchromatic gene	9.56705	8.2313	9.75367	8.63435	10.0125	10.0684	9.53924	9.52759	10.1185	9.63471	10.4959	9.25352	9.35388	9.77984	9.81065	9.52978	9.25877	9.5631	9.54005	8.26533	9.75953
A_09_P022636	euchromatic gene	9.38318	7.99763	9.83303	8.61188	9.33028	9.40972	9.58023	9.38804	9.52563	9.27514	9.95835	8.90857	9.24384	9.28245	9.31552	9.13607	9.13069	9.2756	9.34534	8.16381	9.35208
A_09_P022641	euchromatic gene	9.41817	7.95499	9.72373	8.60442	9.37376	9.56922	9.83617	9.59795	9.57984	9.29112	9.7329	9.35229	9.44801	9.32378	9.2651	9.16124	9.44246	9.11576	9.71113	8.34446	9.61932
A_09_P022646	euchromatic gene	9.64276	8.29594	9.64101	9.00975	9.46825	9.55179	9.61626	9.66633	9.51121	9.52251	9.49496	9.39875	9.42703	9.54493	9.67775	9.56325	9.25687	9.44706	9.48174	8.60761	9.57913
A_09_P022651	euchromatic gene	8.19545	7.34468	8.09378	7.97512	8.24441	8.11964	8.15937	8.27345	8.10605	8.44	8.03032	8.13195	8.35866	8.35356	8.25376	8.40369	8.25534	8.38195	8.55913	7.7462	8.28979
A_09_P022656	euchromatic gene	9.68715	8.38324	10.1713	9.39067	9.93213	10.0506	9.89988	9.70318	10.02	9.60812	10.1781	9.68977	9.63281	9.6214	9.45709	9.52326	9.50601	9.50121	10.0259	8.672	10.0387
A_09_P022661	euchromatic gene	9.8382	8.32943	9.79553	8.92058	9.59004	9.64091	10.0799	9.88935	9.66871	10.0045	9.69817	9.49307	9.57007	9.73102	9.87333	9.81636	9.50653	9.83831	9.69235	8.45799	9.94638
A_09_P022666	euchromatic gene	9.90876	8.05915	9.29311	8.58345	9.56892	9.46689	9.91437	9.53888	9.63618	9.7158	9.60021	9.21937	9.48059	9.52743	9.44679	9.15173	9.301	9.4158	9.60695	8.40014	9.69764
A_09_P022671	euchromatic gene	9.89143	8.31559	10.0925	9.19317	9.921	10.0182	10.2172	9.96087	9.98735	9.94504	9.94848	9.69026	9.72813	9.77709	9.85419	9.64576	9.61943	9.75575	9.93821	8.66323	9.97488
A_09_P022681	euchromatic gene	9.48918	8.13754	9.61073	8.75098	9.36227	9.54018	9.813	9.44169	9.63118	9.27894	9.82324	9.33893	9.41112	9.48477	9.28297	9.2386	9.30283	9.1784	9.62566	8.34199	9.63178
A_09_P022686	euchromatic gene	9.54923	7.96679	9.54715	8.489	9.57223	9.63209	9.4047	9.5661	9.36338	9.42393	9.92959	9.07779	9.04772	9.18418	9.31135	9.09391	9.17368	9.16283	9.40493	8.09589	9.31271
A_09_P022691	euchromatic gene	8.50474	7.74496	8.92937	8.35837	8.64348	8.82996	9.12085	8.71144	8.76556	8.51922	8.92131	8.62898	8.72312	8.68077	8.48568	8.62881	8.62561	8.51543	8.80584	7.79515	8.7635
A_09_P022696	euchromatic gene	9.24303	8.01633	9.29977	8.71381	8.90605	8.70794	9.92139	9.19487	8.78767	9.37247	8.74889	9.05689	9.25123	9.17594	9.0865	8.99025	9.13255	9.12612	9.36141	8.55099	9.76619
A_09_P022701	euchromatic gene	9.24809	7.74416	9.37236	8.63402	9.32127	9.39097	9.55624	9.10239	9.17856	9.17216	9.19844	8.96698	9.15374	8.93834	8.95583	9.12878	9.00746	9.10318	9.40416	8.01065	9.38819
A_09_P022706	euchromatic gene	10.7128	9.31605	11.1716	10.1204	10.728	10.9046	10.4024	10.6019	10.874	10.5257	11.0938	10.4708	10.3414	10.37	10.0827	10.3497	10.5393	10.3066	10.847	9.68979	10.7759
A_09_P022711	euchromatic gene	8.05851	6.97898	8.56353	8.07538	8.18632	8.48123	8.34431	8.16413	8.1481	8.00058	8.09559	7.89777	8.17378	8.14351	8.13292	8.02951	8.13163	8.11236	8.16831	7.33326	8.04334
A_09_P022716	euchromatic gene	8.2485	7.18973	8.67324	8.10437	8.3777	8.50367	8.71173	8.28344	8.41237	8.22718	8.31195	8.01635	8.35872	8.27229	8.24742	8.19982	8.24631	8.18401	8.54146	7.4402	8.3452
A_09_P022721	euchromatic gene	8.69046	7.66009	8.95478	8.37107	8.49373	8.58091	9.13649	8.65759	8.44702	8.57136	8.56531	8.76645	8.78355	8.52401	8.46678	8.42191	8.9123	8.45619	9.01849	8.02876	8.93528
A_09_P022726	euchromatic gene	9.53324	8.10067	9.77714	8.71075	9.27923	9.4978	9.76019	9.58543	9.54136	9.2526	9.72841	9.23971	9.34345	9.2466	9.37814	9.42884	9.1635	9.26066	9.5249	8.1793	9.45998
A_09_P022731	euchromatic gene	9.88999	8.52355	10.049	9.24268	10.0618	10.2939	9.98692	10.0787	10.1379	9.83265	10.4443	9.54042	9.54804	9.80254	9.63109	9.70522	9.57504	9.73008	10.0069	8.46633	9.8383
A_09_P022736	euchromatic gene	10.4025	8.44378	10.5681	9.31077	10.2896	10.3573	10.8121	10.5435	10.6047	10.6141	10.6871	10.2636	10.3462	10.4178	10.6973	10.4076	10.1931	10.4077	10.4763	9.02353	10.6266
A_09_P022741	euchromatic gene	9.57866	8.60256	10.0753	9.3077	9.77274	9.87171	10.4552	10.4751	9.77812	9.81582	9.76501	9.5627	9.79559	9.47955	9.99353	9.70108	9.39928	9.57254	9.90463	9.58505	9.93631
A_09_P022746	euchromatic gene	9.64667	8.31912	9.57626	8.88586	9.51507	9.43565	9.65822	9.45931	9.49772	9.49637	9.64025	9.16254	9.32387	9.57613	9.6667	9.15088	9.09156	9.39198	9.40309	8.43023	9.48342
A_09_P022751	euchromatic gene	8.40019	7.58961	8.1958	7.84568	8.34181	8.30567	8.75818	8.28859	8.2227	8.13207	8.47382	8.37619	8.51045	8.415	8.19303	8.26051	8.4059	8.17034	8.48501	7.67316	8.55113
A_09_P022756	euchromatic gene	9.73009	8.80051	9.96092	9.3881	9.83907	9.86368	10.1761	10.0235	9.99595	10.2118	10.082	9.79552	9.71642	9.97925	10.0991	10.2225	9.82521	10.1193	10.1026	9.34781	10.3496
A_09_P022761	euchromatic gene	9.56923	8.15321	9.60803	8.88232	9.61753	9.65097	9.80052	9.57173	9.76128	9.58168	9.29057	9.07985	9.46194	9.31274	9.06069	9.025	9.348	9.37333	9.78218	8.52338	9.77618
A_09_P022766	euchromatic gene	9.83654	8.36645	10.5546	9.35914	10.0799	9.99567	10.1231	9.79624	10.0154	9.91006	10.1598	9.5835	9.91396	9.75978	9.76934	9.60385	9.79639	9.72627	10.2318	8.73196	10.0246
A_09_P022771	euchromatic gene	10.6462	10.1531	10.8899	10.5815	11.1665	11.05	10.7674	10.9077	11.1485	10.8806	11.1594	10.0725	10.0635	10.6709	10.7207	10.604	9.99839	10.7343	10.3648	9.92375	10.7534
A_09_P022776	euchromatic gene	9.11532	7.78498	9.50177	8.87984	9.17551	9.53727	9.57524	9.10273	9.38122	9.20602	9.61916	9.00072	9.15812	8.85271	8.84052	8.86951	9.03992	9.15415	9.34397	8.08394	9.24592
A_09_P022781	euchromatic gene	10.0118	8.28049	9.67176	8.74452	9.66616	9.56461	10.1868	10.0246	9.75162	10.0078	9.89381	9.74755	9.78084	9.83874	10.0098	9.81302	9.74942	9.72362	10.0261	8.55792	10.1058
A_09_P022786	euchromatic gene	9.81435	8.29483	10.0998	8.98866	9.72933	9.72949	10.0599	9.86659	9.75629	9.85259	9.82519	9.56628	9.79333	9.5082	9.65934	9.6888	9.64258	9.69564	9.92295	8.61638	9.967
A_09_P022791	euchromatic gene	9.28216	8.11239	9.6048	8.76755	9.42705	9.65325	9.22203	9.49634	9.68158	9.20533	9.72739	8.72803	8.68325	9.36739	9.41631	9.20493	8.67925	9.06127	9.00924	7.79557	8.93342
A_09_P022796	euchromatic gene	10.1637	8.3146	9.92253	8.78976	9.86611	9.82554	10.4835	10.1318	9.96042	10.2103	10.0062	9.92745	9.97317	10.0388	10.1847	10.0195	9.82545	9.99975	10.2337	8.86021	10.3366
A_09_P022801	euchromatic gene	9.55131	8.18545	9.35313	8.72135	9.33951	9.37856	10.0913	9.59865	9.51234	9.63264	9.54063	9.37651	9.47598	9.50789	9.53901	9.48267	9.38501	9.4596	9.58059	8.38239	9.66736
A_09_P022806	euchromatic gene	9.25257	7.98243	9.1477	8.38818	9.00543	8.93583	9.60948	9.07803	8.99157	9.04429	8.94077	8.8996	9.04369	8.98489	8.88664	8.72402	8.98389	8.91432	9.45948	8.08203	9.27824
A_09_P022811	euchromatic gene	9.2532	7.99773	9.65379	8.7507	9.48465	9.56684	9.50775	9.42851	9.53009	9.23549	9.74587	9.19962	9.10641	9.37467	9.25455	9.25729	9.03452	9.09832	9.44312	8.49537	9.52193
A_09_P022816	euchromatic gene	10.3043	8.79694	9.50272	8.79454	10.0578	10.2168	9.21754	10.0701	10.366	10.1035	10.4766	9.16337	9.14026	10.147	9.98295	9.68777	9.07526	9.78748	9.39372	8.18768	9.37125
A_09_P022821	euchromatic gene	8.88224	7.46187	8.89377	8.21577	8.76909	8.9333	9.0577	8.70878	8.72789	8.8194	8.7594	8.68126	8.67453	8.51797	8.4111	8.60615	8.73161	8.72773	8.89077	7.71793	8.8087
A_09_P022826	euchromatic gene	9.20166	7.82726	9.38911	8.58227	9.13689	9.16275	9.57358	9.26687	9.33595	9.19438	9.37433	9.15539	9.23287	9.29548	9.03934	8.99255	9.03985	9.11401	9.36818	8.05935	9.38209
A_09_P022831	euchromatic gene	10.279	8.29844	10.1416	9.14066	9.66769	9.77522	10.1901	9.74708	9.90562	9.71798	10.0139	9.70247	9.85404	9.78393	9.75115	9.62682	9.70161	9.49195	10.1373	8.66492	9.96885
A_09_P022836	euchromatic gene	8.94766	7.87944	9.39707	8.37725	9.1532	9.21724	9.426	8.97936	9.18368	8.98628	9.23817	8.73814	8.95081	8.86319	9.10685	8.82874	8.79942	9.12744	9.08835	8.4557	9.15263
A_09_P022841	euchromatic gene	9.60889	7.80159	10.1419	8.87589	9.62174	9.60887	10.0129	9.50652	9.8211	9.43974	9.84024	9.4177	9.4809	9.32981	9.34351	9.18926	9.28832	9.27607	9.61933	8.23064	9.65391
A_09_P022846	euchromatic gene	10.4177	8.39327	10.0721	8.99164	10.083	9.97007	10.3048	10.009	10.1106	9.96001	10.205	9.9039	10.0706	9.79471	9.7859	9.4713	9.94892	9.59369	10.2627	8.71948	10.2493
A_09_P022851	euchromatic gene	9.08066	7.64245	9.46864	8.54241	9.22589	9.41435	9.4736	9.08357	9.11294	9.16488	9.20759	8.78607	8.90622	8.75296	8.73369	9.08569	8.89644	8.92351	9.26605	7.83422	9.20218
A_09_P022856	euchromatic gene	9.08855	8.0509	9.5142	8.98886	9.38444	9.49561	9.19111	9.10758	9.29903	9.19994	9.3664	8.63142	8.6898	9.01975	8.91901	9.06321	8.71088	8.9298	9.07863	7.83552	8.85707
A_09_P022861	euchromatic gene	9.01436	7.91761	9.75657	9.38144	9.35007	9.36339	9.44356	8.97265	9.18923	9.10742	9.38913	9.20121	8.89504	9	8.90864	8.94003	8.92709	9.02784	9.40108	8.01502	9.18704
A_09_P022866	euchromatic gene	10.2386	8.99147	10.2558	9.02887	10.454	10.419	10.5256	10.3396	10.3826	10.1417	10.5798	9.81394	9.83987	10.1011	10.2412	9.94131	9.78103	10.0029	10.0444	8.61045	10.1877
A_09_P022871	euchromatic gene	8.2731	7.22542	8.69329	8.21878	8.45283	8.34547	8.54255	8.14001	8.32058	8.24257	8.31051	8.12362	8.34902	8.28908	8.0618	8.09029	8.4204	8.1312	8.56966	7.5479	8.43694
A_09_P022876	euchromatic gene	11.001	10.4743	12.1374	12.2353	12.2166	12.1964	11.4416	11.855	12.1068	11.8343	12.0864	11.1163	11.1214	11.5872	11.8302	12.0873	11.0138	11.9385	11.0894	11.069	11.4668
A_09_P022881	euchromatic gene	9.2298	7.65187	9.3526	8.62033	9.12943	8.86156	9.16165	8.86011	8.88459	8.97115	8.87702	8.83985	8.94567	8.82358	8.77882	8.4705	8.94573	8.68325	9.13364	8.04559	9.16984
A_09_P022886	euchromatic gene	8.94966	7.64226	8.6264	8.33786	8.92454	8.88884	9.40295	9.04909	9.02479	8.89544	9.03047	8.69281	8.8654	8.87991	8.86877	8.7313	8.81926	8.84466	9.10868	8.04251	9.08574
A_09_P022891	euchromatic gene	9.90936	8.26371	10.1099	9.13885	9.9673	10.2903	10.357	10.1104	10.2631	10.1721	10.3223	9.71611	9.76884	9.97096	9.90298	9.89878	9.61746	9.93327	9.80007	8.48151	9.97144
A_09_P022896	euchromatic gene	8.50847	7.40702	9.4988	8.25698	8.82401	8.85802	9.14467	8.59416	8.7792	8.74824	8.65027	8.28593	8.68766	8.65058	8.61958	8.45464	8.59977	8.55979	8.58087	7.59713	8.88738
A_09_P022901	euchromatic gene	10.8607	9.87956	11.4531	10.9216	11.314	11.4475	10.834	11.1524	11.2802	10.8437	11.5862	10.4565	10.1296	10.6559	10.5128	10.8671	10.3667	10.6591	10.577	9.74182	10.6159
A_09_P022906	euchromatic gene	9.06873	7.55034	9.47242	8.73961	9.05011	8.97054	9.39165	8.93037	9.07529	9.12583	9.03602	8.84659	9.04398	9.16218	9.09662	8.88487	8.87924	9.03279	9.03468	7.83825	9.2403
A_09_P022911	euchromatic gene	10.5976	8.76689	11.3028	9.65461	10.5538	10.6537	10.7871	10.4823	10.5999	10.3818	10.8256	10.2695	10.5525	10.2834	10.5403	10.293	10.3903	10.1858	10.5706	9.19032	10.7594
A_09_P022916	euchromatic gene	9.35681	7.78708	9.61915	8.6759	9.46723	9.33585	9.79353	9.44147	9.43571	9.25434	9.23087	8.90454	9.12154	9.08295	9.04942	8.99358	9.07098	9.1156	9.29189	8.13875	9.5887
A_09_P022921	euchromatic gene	9.27354	7.7353	9.28784	8.54924	9.0196	8.9864	9.65709	9.22959	9.09351	9.28122	9.01418	9.08475	9.27729	9.1246	8.88411	8.85305	9.17422	9.09528	9.4777	8.1217	9.52719
A_09_P022926	euchromatic gene	10.6583	10.1471	12.0113	12.071	12.3092	12.2706	11.204	11.9965	12.1431	11.9294	12.2017	10.3252	10.3014	11.1125	11.1636	12.1506	10.4175	11.8128	10.5822	10.2616	10.739
A_09_P022931	euchromatic gene	9.38694	8.10469	9.66629	8.66256	9.04463	8.96678	9.83862	9.16097	9.09596	9.15263	8.97546	9.03328	9.14384	8.89862	8.93136	8.88033	9.08183	8.92809	9.24525	8.58627	9.41115
A_09_P022936	euchromatic gene	9.58876	8.03521	9.76932	9.12265	9.44578	9.32437	9.66874	9.65658	9.51474	9.56935	9.48667	9.17515	9.25581	9.31433	9.35517	9.23743	9.10511	9.35383	9.49637	8.19955	9.44306
A_09_P022941	euchromatic gene	9.38804	8.10794	9.8569	9.11332	9.40988	9.35797	10.0027	9.65753	9.38583	9.61662	9.49397	9.30668	9.37539	9.5342	9.42503	9.42035	9.34652	9.47578	9.5329	8.46842	9.68308
A_09_P022946	euchromatic gene	8.07295	7.0601	8.32746	7.61188	8.45472	8.51753	9.12349	8.55948	8.7045	8.7118	8.89864	8.3357	8.02482	8.58123	8.03046	8.33382	8.05505	8.37902	8.50225	7.16936	8.68384
A_09_P022951	euchromatic gene	9.54169	7.91036	9.9973	8.71357	9.40373	9.67766	9.65675	9.52254	9.67745	9.17837	9.83505	9.07888	9.20723	9.26339	9.03481	9.11199	9.28	9.17489	9.5378	8.05303	9.57377
A_09_P022956	euchromatic gene	9.58697	8.39564	9.35323	8.80345	9.17956	9.34106	9.51613	9.20448	9.33487	9.17981	9.48283	9.1699	9.25666	9.2098	9.13599	8.97058	9.14165	9.08957	9.48793	8.3174	9.47487
A_09_P022961	euchromatic gene	9.26351	8.00094	9.66219	9.12992	9.57478	9.66679	9.64931	9.51661	9.47088	9.30541	9.79949	8.97753	9.09641	9.176	8.96335	9.34489	9.24847	9.15673	9.31889	8.26421	9.59564
A_09_P022966	euchromatic gene	9.17736	7.73518	9.79696	8.85111	9.36407	9.58068	9.63524	9.32405	9.3929	9.08748	9.5673	8.9557	9.08946	9.14277	9.06361	9.20662	8.94229	8.98683	9.22197	8.0299	9.27626
A_09_P022971	euchromatic gene	9.27965	8.26842	9.08534	8.84604	8.88628	8.87279	9.48612	9.13233	9.06336	9.14358	9.13597	9.12732	9.20778	9.10466	9.20252	8.99923	9.05124	8.96193	9.17145	8.57343	9.02047
A_09_P022976	euchromatic gene	10.4703	8.45026	10.0183	8.87198	10.3291	10.2678	10.1237	10.1316	10.4152	10.2282	10.497	9.72039	9.82221	9.92602	10.1795	9.75099	9.55316	9.74062	9.97678	8.4029	10.0127
A_09_P022981	euchromatic gene	8.97901	7.56038	9.00922	8.03346	9.02877	8.88947	8.86955	8.75138	8.9964	8.76927	9.13937	8.37946	8.49632	8.64027	8.62478	8.494	8.44823	8.64486	8.69757	7.54688	8.68853
A_09_P022986	euchromatic gene	9.49878	7.96107	10.2092	9.16866	9.41864	9.4967	9.59878	9.51506	9.46736	9.28342	9.49882	9.1998	9.24274	9.22315	9.12523	9.24348	9.26547	9.18358	9.67048	8.15588	9.63584
A_09_P022991	euchromatic gene	9.55435	7.7925	9.90339	8.84045	9.53004	9.61588	10.1609	9.59752	9.73884	9.6225	9.72983	9.34487	9.41917	9.41276	9.3345	9.33776	9.22534	9.38155	9.71499	8.22566	9.47227
A_09_P022996	euchromatic gene	9.84302	8.07106	10.1351	9.12016	9.74105	9.92077	9.85604	9.74864	9.89927	9.7829	9.88494	9.67202	9.5511	9.49221	9.40122	9.40293	9.49968	9.5092	9.93007	8.49874	9.9348
A_09_P023001	euchromatic gene	9.61852	8.57235	10.0463	9.85762	9.95584	10.031	10.0935	9.82151	9.9374	9.81734	10.0173	9.41356	9.52579	9.79995	9.84557	9.80316	9.4227	9.74935	9.47897	8.90462	9.85886
A_09_P023006	euchromatic gene	8.96245	7.73799	9.24631	8.58977	9.19971	9.2075	9.36571	9.03602	9.16696	8.94165	9.28311	8.8044	8.79435	8.81223	8.7299	8.83014	8.97055	8.8149	9.18193	7.78925	9.0137
A_09_P023011	euchromatic gene	8.29563	7.25639	8.59521	7.95177	8.38778	8.20043	8.67899	8.22432	8.30845	8.0921	8.28884	8.06598	8.24518	8.21997	8.1541	7.96142	8.21835	8.14989	8.44938	7.48414	8.47301
A_09_P023016	euchromatic gene	10.0109	8.09275	9.93743	9.02951	9.48978	9.42965	9.92741	9.83669	9.61843	9.67653	9.55909	9.5264	9.58692	9.58875	9.361	9.14834	9.54556	9.34778	9.86515	8.62834	9.7818
A_09_P023021	euchromatic gene	8.90872	7.78207	9.45055	8.70495	8.80725	9.00409	9.43516	9.08532	9.18642	9.12001	9.12995	8.64229	8.73475	9.03098	9.238	9.1946	8.96127	8.97904	9.06343	7.94578	9.16995
A_09_P023026	euchromatic gene	10.101	8.33548	9.53365	8.69862	9.89151	10.2075	9.91684	10.1078	10.2106	9.69687	10.3631	9.67641	9.54819	9.94702	9.63355	9.61287	9.49204	9.65702	9.79277	8.20408	9.87321
A_09_P023031	euchromatic gene	8.42128	7.35594	8.93123	8.19562	8.50665	8.62736	8.65654	8.39923	8.48523	8.33575	8.46324	8.22407	8.35744	8.4332	8.31038	8.30686	8.38786	8.35138	8.64354	7.5739	8.59304
A_09_P023036	euchromatic gene	9.34745	7.82465	10.2632	8.92156	9.31436	9.36782	9.39997	9.25969	8.90882	9.05111	9.05185	8.98317	9.48717	9.08652	9.09739	8.96806	9.01545	8.92546	9.42176	9.17499	9.29542
A_09_P023041	euchromatic gene	10.1817	8.86807	10.5515	9.298	10.1225	10.228	10.1468	10.1965	10.2778	10.0695	10.4513	9.81892	9.88902	10.074	10.1771	9.8961	9.6929	9.9903	9.97046	9.061	10.1568
A_09_P023046	euchromatic gene	8.86761	7.61502	9.11674	8.36913	8.73041	8.89199	9.2957	8.95059	8.83583	8.86685	8.94499	10.1852	8.84896	8.80209	8.70727	8.7608	8.83862	8.80493	9.17852	7.94651	9.05611
A_09_P023051	euchromatic gene	9.48134	7.7761	9.54872	8.6505	9.29171	9.32449	9.70804	9.39814	9.44788	9.36108	9.39789	9.2177	9.31233	9.19803	9.15323	9.06696	9.20265	9.19384	9.60279	8.18104	9.63304
A_09_P023061	euchromatic gene	8.32445	7.43728	8.43186	7.94303	8.30823	8.25308	8.48649	8.1408	8.32028	8.23027	8.17561	7.96666	8.27533	8.10917	7.95382	8.09354	8.1643	8.12285	8.29562	7.42667	8.33852
A_09_P023066	euchromatic gene	9.1166	7.5524	9.08895	8.42932	8.94286	8.8865	9.41474	8.91222	8.95982	9.08485	8.9514	8.71311	8.86929	8.86471	8.87842	8.91838	8.84448	8.94034	9.02066	8.02306	9.00009
A_09_P023071	euchromatic gene	9.53931	8.01456	10.0057	9.0391	9.40204	9.28445	9.87447	9.44467	9.43989	9.42132	9.37982	9.2828	9.35619	9.25184	9.2494	9.24009	9.19529	9.29116	9.54757	8.29394	9.59131
A_09_P023076	euchromatic gene	9.39871	7.81441	9.15015	8.30346	9.38144	9.47954	9.85043	9.1628	9.41057	9.2902	9.67353	9.2564	9.26441	9.12305	9.00207	9.10979	9.2083	9.092	9.42402	8.19834	9.47545
A_09_P023081	euchromatic gene	10.1447	8.57885	10.5391	9.21683	10.1856	10.4839	10.3246	9.97195	10.3757	10.0797	10.7683	9.85205	10.055	9.86111	9.8468	9.76094	9.78415	9.80152	10.3503	8.90172	10.3119
A_09_P023086	euchromatic gene	8.89095	7.53547	8.71275	7.87412	8.78705	8.88626	9.01923	8.6397	8.77368	8.69215	8.91167	8.38582	8.75688	8.60646	8.58712	8.50023	8.47733	8.60453	8.73301	7.71747	8.95103
A_09_P023091	euchromatic gene	8.38364	7.44887	8.30656	7.70432	8.24631	8.31548	8.93478	8.49	8.34818	8.28768	8.60107	8.37441	8.49296	8.32932	8.23891	8.45274	8.42626	8.36731	8.47373	7.61626	8.54648
A_09_P023096	euchromatic gene	9.44653	8.00565	10.144	9.05056	9.35762	9.40983	9.64178	9.35976	9.39037	9.33964	9.56518	9.02364	9.45468	9.22133	9.26084	9.12013	9.18904	9.1962	9.5035	8.25416	9.68854
A_09_P023101	euchromatic gene	9.73416	8.04117	9.72648	8.73243	9.81106	10.0973	9.13821	9.76645	9.92874	9.67175	10.2094	8.69069	8.79414	9.56392	9.47611	9.4088	8.85606	9.51861	8.99136	7.46201	8.9124
A_09_P023106	euchromatic gene	9.28774	8.22294	10.154	9.26523	9.35304	9.41972	9.77723	9.43168	9.50854	9.42406	9.48149	9.36819	9.21245	9.33911	9.29202	9.14351	9.23025	9.13644	9.50772	8.49037	9.47087
A_09_P023111	euchromatic gene	9.70214	8.19458	10.3867	9.25624	10.0693	10.2759	9.60694	9.62189	10.0873	9.5871	10.2086	9.00895	9.04405	9.47661	9.3647	9.47008	9.00341	9.34065	9.41713	8.0149	9.49255
A_09_P023116	euchromatic gene	10.1268	8.15259	9.82846	8.83121	9.97814	9.91289	10.0958	9.83103	10.0115	10.0526	10.1403	9.53942	9.52258	9.94871	9.6889	9.58484	9.26404	9.64416	9.72467	8.25975	9.88914
A_09_P023122	euchromatic gene	10.9799	9.77276	10.6504	10.0305	10.5707	10.6142	11.11	10.8476	10.667	10.7885	10.7228	10.4987	10.8036	10.8426	10.8837	10.6224	10.5309	10.5959	10.6809	10.1551	11.0672
A_09_P023126	euchromatic gene	9.96269	8.27712	10.7269	9.23238	10.0502	10.0943	10.2735	9.9438	10.2473	9.92785	10.3777	9.71525	9.81518	9.77289	9.82698	9.62666	9.70855	9.57278	10.0353	8.51753	10.0641
A_09_P023131	euchromatic gene	9.61078	7.96086	10.2841	9.3004	9.57543	9.92652	9.85184	9.6547	9.70475	9.53826	9.69102	9.41041	9.37071	9.50469	9.32392	9.23971	9.56049	9.27694	9.77983	8.44657	9.65269
A_09_P023136	euchromatic gene	9.89341	8.11482	10.5795	9.3457	9.88671	9.797	10.1021	9.9925	9.82237	9.84399	9.90924	9.64805	9.72159	9.59362	9.77912	9.78701	9.58717	9.77217	10.0275	8.50436	10.2758
A_09_P023141	euchromatic gene	10.6578	8.78633	10.3777	9.33065	10.4852	10.4495	10.749	10.3753	10.5685	10.6015	10.6832	10.3309	10.3383	10.2856	10.2737	9.95829	10.2417	10.0801	10.5496	9.12904	10.7446
A_09_P023146	euchromatic gene	9.20615	7.75393	9.32162	8.30667	9.09541	9.10064	9.40989	8.92621	9.12275	9.19292	9.07809	8.77955	9.06956	8.86212	8.94026	9.01427	8.9177	9.01644	9.24846	7.92756	9.12411
A_09_P023151	euchromatic gene	9.06225	7.6064	9.50645	8.73788	9.09273	9.02659	9.64045	8.91985	9.12394	9.01257	8.92426	9.07221	8.98152	9.102	8.98085	8.76492	9.10417	8.77599	9.31407	8.26272	9.25234
A_09_P023156	euchromatic gene	10.3654	9.15312	10.2819	9.47249	9.93771	9.77696	10.9478	10.208	9.8734	10.2278	9.96053	10.2159	10.2852	10.2995	9.94533	9.85808	10.3077	9.89771	10.488	9.77144	10.7118
A_09_P023161	euchromatic gene	8.81148	7.60296	8.92921	8.39142	9.03567	8.84957	9.12672	8.7384	9.03349	8.82017	8.9925	8.5849	8.73971	8.75401	8.708	8.34582	8.52495	8.64248	8.77334	7.84668	8.87608
A_09_P023166	euchromatic gene	9.1803	7.62359	8.59546	8.05438	9.0173	8.84294	9.43885	8.91855	8.96066	9.07116	9.02505	8.77868	8.96318	9.04955	8.81457	8.74162	8.81392	8.83141	9.06763	7.87428	9.2228
A_09_P023171	euchromatic gene	9.27176	7.76927	9.18653	8.65226	9.4082	9.35793	9.72887	9.33975	9.47726	9.48235	9.48738	9.0192	9.13338	9.33624	9.26365	9.26988	9.07616	9.2362	9.31461	8.18534	9.28168
A_09_P023176	euchromatic gene	8.6098	7.80179	8.96463	8.61918	8.65197	8.50196	9.00021	8.62655	8.65536	8.7173	8.75545	8.61986	8.7356	8.59466	8.70656	8.67851	8.63181	8.67882	8.70144	8.12648	8.81347
A_09_P023181	euchromatic gene	9.1356	7.80126	8.74718	8.29797	8.64039	8.53664	9.13646	8.74008	8.57839	8.95224	8.74326	8.71052	8.9197	8.87735	8.778	8.53727	8.84458	8.73343	9.17723	8.24872	9.14459
A_09_P023186	euchromatic gene	11.5577	11.2692	12.6754	12.868	13.5539	13.5389	11.9894	13.0595	13.2727	13.0449	13.332	11.3879	11.3456	12.5485	12.4706	13.4487	11.8666	13.3251	11.6305	11.9408	12.2641
A_09_P023191	euchromatic gene	8.98651	7.6433	9.4773	8.62241	9.0166	9.11176	9.48763	9.14172	9.17109	8.85704	9.35445	9.04736	9.08122	9.04665	8.95857	8.92471	9.0142	8.7992	9.30596	7.99777	9.2301
A_09_P023196	euchromatic gene	9.52825	7.98931	10.1193	9.41319	9.67066	9.66406	9.94705	9.63733	9.73162	9.61383	9.75024	9.19488	9.38435	9.36524	9.19105	9.22378	9.23875	9.39062	9.66714	8.25496	9.51597
A_09_P023201	euchromatic gene	12.016	11.5939	12.769	12.901	13.27	13.2183	12.1765	13.0128	13.2386	12.9524	13.1338	11.412	11.4519	12.3637	12.719	12.9073	11.2956	12.7853	11.3633	11.5453	11.8865
A_09_P023206	euchromatic gene	10.8652	9.98717	10.4375	10.1657	10.4428	10.4338	11.7378	10.9286	10.5954	11.3333	10.5833	10.9536	11.0363	10.9801	11.0123	11.3623	11.0393	11.2115	11.0505	10.8413	11.5255
A_09_P023211	euchromatic gene	10.3614	9.84513	10.6585	9.93851	10.4495	10.4956	10.399	10.3289	10.4098	10.1537	10.4156	10.3887	10.3927	10.2281	10.6471	10.2033	10.1425	10.2392	10.3395	10.0427	10.3731
A_09_P023216	euchromatic gene	9.66201	7.92384	10.0122	8.89987	9.83283	10.0025	10.0516	9.61263	9.81637	9.60316	10.0932	9.61432	9.48521	9.47562	9.44429	9.44293	9.42777	9.54337	9.8017	8.3267	9.85147
A_09_P023221	euchromatic gene	11.6959	11.304	11.5789	11.6651	11.9662	11.9053	11.5288	11.5625	11.7417	11.8258	11.926	11.2513	11.2233	11.7815	12.0418	12.0598	11.0231	11.9071	11.0282	11.1399	11.5906
A_09_P023226	euchromatic gene	9.56125	8.08591	10.0507	9.38683	9.80396	9.85183	9.71622	9.58757	9.89602	9.30503	9.98346	9.46251	9.40334	9.55041	9.40303	9.26578	9.31767	9.27398	9.60688	8.51269	9.57736
A_09_P023231	euchromatic gene	8.86466	8.08938	8.53813	7.69013	8.70674	8.9376	8.4904	8.72279	8.991	8.7255	9.21919	8.08816	8.08258	8.76077	8.82451	8.47113	8.04972	8.50931	8.17453	7.0679	8.26097
A_09_P023236	euchromatic gene	10.7349	8.79605	10.8687	9.48671	10.7828	10.7129	10.7192	10.7673	10.7723	10.6666	10.9328	9.98018	10.0498	10.4866	10.7105	10.4987	9.83675	10.5101	10.2764	8.84532	10.4731
A_09_P023241	euchromatic gene	8.78703	7.48883	9.0567	8.37987	8.71085	8.66052	9.38732	8.76295	8.63345	8.92093	8.75907	8.65452	8.83455	8.95017	8.82165	8.64493	8.82065	8.84627	9.06037	7.91374	9.04288
A_09_P023246	euchromatic gene	8.8674	7.65957	8.60544	8.171	8.84096	8.79222	9.05324	8.94957	9.03236	9.03985	8.8684	8.27503	8.45767	8.53067	8.42527	8.7563	8.54407	8.71533	8.71856	7.66663	8.78361
A_09_P023251	euchromatic gene	10.3177	8.50669	11.0396	9.58168	10.7163	10.8481	10.2416	10.388	10.7443	10.2159	11.0983	9.72779	9.62162	10.2214	10.0876	10.118	9.63481	9.98699	9.88361	8.30416	10.181
A_09_P023256	euchromatic gene	9.44806	7.90786	9.60729	8.76035	9.36811	9.17515	9.80637	9.4321	9.29865	9.37234	9.36998	9.17342	9.26655	9.33619	9.31831	9.32189	9.18384	9.20595	9.40445	8.20779	9.64602
A_09_P023261	euchromatic gene	9.54224	8.24374	9.32592	8.55191	9.41666	9.3897	9.41258	9.02977	9.46743	9.15443	9.57205	8.94182	9.10302	8.96058	8.87661	8.85765	8.99132	8.94464	9.27162	8.20929	9.43841
A_09_P023266	euchromatic gene	9.49775	8.2802	10.0172	8.76059	9.67477	9.73847	9.62458	9.54926	9.71818	9.47997	9.91788	9.38282	9.40491	9.40799	9.51669	9.19469	9.45207	9.21558	9.6653	8.55925	9.65616
A_09_P023271	euchromatic gene	10.0605	8.64959	10.7546	9.85391	10.4456	10.7275	10.2614	10.113	10.4928	10.1609	10.6448	9.9096	9.73807	10.0037	9.99353	10.0656	9.78736	10.2327	10.1798	8.74179	10.0992
A_09_P023276	euchromatic gene	9.93985	8.43054	10.126	8.77685	9.78993	10.063	9.94358	9.90902	10.0527	9.95791	10.2413	9.59729	9.54698	9.67794	9.68322	9.54129	9.47522	9.65597	9.80494	8.47898	9.80618
A_09_P023281	euchromatic gene	10.0485	8.30574	10.3245	9.25504	9.98083	10.1319	10.4413	10.037	10.2849	9.98673	10.3998	9.78156	9.85275	9.84796	9.65204	9.68208	9.69735	9.78732	10.1605	8.71738	10.162
A_09_P023286	euchromatic gene	8.81692	7.486	9.45491	8.4649	8.91059	9.07764	9.14224	8.77853	9.10415	8.77713	9.1746	8.51847	8.54061	8.75506	8.79702	8.55079	8.48475	8.64082	8.75812	7.67377	8.80808
A_09_P023291	euchromatic gene	9.06046	7.80479	9.7237	8.73998	9.01637	8.99785	9.44974	8.8888	9.04274	8.99023	9.12756	8.87226	9.08628	8.8989	9.01769	8.8727	9.06218	8.79765	9.3735	8.13349	9.25204
A_09_P023296	euchromatic gene	10.0907	8.11441	10.0699	8.88281	9.95788	9.77077	10.2016	9.99534	9.99445	10.0081	10.1731	9.67096	9.81911	9.75289	9.87451	9.62727	9.67863	9.88291	10.0295	8.49762	10.1026
A_09_P023301	euchromatic gene	8.8473	7.77688	9.15884	8.55699	9.09789	9.16472	9.35947	8.95656	8.97781	8.83986	9.0975	8.62862	8.74727	9.0975	8.65999	8.80053	8.74576	8.7206	8.92291	7.9453	9.04019
A_09_P023306	euchromatic gene	10.469	9.17094	10.5528	10.2596	10.1297	10.1621	10.7015	10.2819	10.1099	10.1575	10.1457	10.2884	10.3317	10.346	10.3484	10.0841	10.3005	10.1117	10.3931	9.96241	10.5564
A_09_P023311	euchromatic gene	9.15563	7.69247	9.4228	8.75937	8.85288	8.80292	9.31614	8.6911	8.88996	8.98936	8.83461	8.65632	8.9215	8.81448	8.5493	8.64075	8.81736	8.68645	9.06183	7.7658	8.88849
A_09_P023316	euchromatic gene	9.45075	7.91881	9.76923	9.012	9.40391	9.44047	9.72074	9.55973	9.41976	9.43873	9.48382	9.19067	9.3361	9.18812	9.37843	9.33335	9.26522	9.34091	9.5925	8.36898	9.44503
A_09_P023321	euchromatic gene	9.72262	8.16834	10.0039	8.66079	9.48367	9.75643	9.88483	9.49797	9.72662	9.61619	10.0092	9.48736	9.64192	9.38274	9.4515	9.39583	9.55968	9.45792	10.0864	8.36117	9.82689
A_09_P023326	euchromatic gene	9.81096	7.95268	9.51563	8.46651	9.42513	9.47539	10.029	9.56765	9.69577	9.50537	9.77388	9.45454	8.5878	9.38209	9.33734	9.11761	9.46696	9.26846	9.73108	8.32859	9.67854
A_09_P023331	euchromatic gene	9.39547	7.82356	9.55853	8.35195	9.33357	9.43768	9.42513	9.17955	9.51205	9.28889	9.76177	9.04461	9.31601	9.24509	9.21882	9.01207	9.09033	9.18486	9.38758	8.18314	9.41423
A_09_P023336	euchromatic gene	9.36516	8.36965	9.85206	8.99434	9.49085	9.51801	9.62616	9.44399	9.61212	9.52395	9.67321	9.42428	9.44963	9.11637	9.21635	9.29857	9.28726	9.34854	9.80934	8.68331	9.78252
A_09_P023341	euchromatic gene	9.5551	7.97075	9.83649	8.66293	9.47592	9.67069	9.46638	9.46338	9.76426	9.45622	10.0193	9.18508	9.26202	9.19376	9.21708	9.24417	9.07637	9.30316	9.49731	8.09899	9.41455
A_09_P023346	euchromatic gene	9.18685	8.04781	9.54778	9.08398	9.53202	9.52048	9.6978	9.76956	9.61754	9.64825	9.60202	9.0429	9.13653	9.15922	9.3131	9.37528	9.08171	9.42597	9.31772	8.57024	9.43555
A_09_P023351	euchromatic gene	10.1415	8.3804	10.3606	9.28743	10.0752	9.90085	10.4455	10.1034	10.0157	10.1399	10.1119	9.93249	10.0028	9.8408	9.92467	9.70562	9.85865	9.77489	10.2468	8.81508	10.2263
A_09_P023356	euchromatic gene	10.3303	8.7447	10.5033	9.32459	10.4475	10.6315	10.6138	10.3148	10.5129	10.4373	10.8342	10.0211	10.1792	10.2254	10.3213	10.0083	10.0298	10.12	10.3771	8.82022	10.4828
A_09_P023361	euchromatic gene	9.71058	8.3371	10.2787	9.55913	9.93964	10.1483	10.2428	9.99491	10.1277	10.0554	10.2396	9.62618	9.39047	9.79637	9.70384	10.0675	9.52712	10.0773	9.53519	8.59435	9.6894
A_09_P023366	euchromatic gene	11.205	10.0134	11.3733	10.6117	11.3581	11.3194	10.8514	11.2104	11.4957	11.0416	11.4504	10.2517	10.1905	11.1021	11.0483	10.8693	10.1236	10.9137	10.3177	9.66846	10.7616
A_09_P023371	euchromatic gene	9.9444	8.89175	9.95292	9.40271	10.2912	10.0369	9.79889	10.047	10.1037	9.9699	10.3272	9.25101	9.34458	9.7709	9.94734	9.70603	9.24174	9.75727	9.3975	8.89498	9.65841
A_09_P023381	euchromatic gene	6.30773	6.03281	7.91467	6.67014	7.68768	7.81743	8.3119	8.01808	7.94054	7.98546	8.01324	7.3152	7.42408	7.61528	7.65237	7.715	7.25247	7.68945	7.69912	6.24317	7.79358
A_09_P023386	euchromatic gene	9.42407	7.99998	9.53115	8.79522	9.59225	9.93473	9.84794	9.44879	9.80001	9.51518	10.136	9.5798	9.53172	9.25234	9.32504	9.26906	9.47863	9.38488	9.78555	8.35351	9.73415
A_09_P023391	euchromatic gene	8.71313	7.52715	9.27024	8.59995	8.65164	8.4912	8.80853	8.51288	8.62822	8.58925	8.48187	8.45207	8.67078	8.5848	8.35124	8.40291	8.66569	8.46542	8.9731	7.80397	8.84747
A_09_P023396	euchromatic gene	10.4449	8.63776	10.7218	9.40307	10.4147	10.54	10.8564	10.5928	10.6252	10.4903	10.7335	10.4842	10.455	10.3988	10.248	10.2649	10.4045	10.3239	10.675	9.15659	10.7711
A_09_P023401	euchromatic gene	8.93003	7.60697	9.2706	8.45413	8.93186	8.9685	8.79756	8.71285	8.94218	8.71732	8.92432	8.63081	8.62266	8.64248	9.46704	8.57888	8.8513	8.62294	9.06789	7.94089	8.9435
A_09_P023411	euchromatic gene	9.77474	8.02056	9.48717	8.55545	9.42926	9.45211	9.95836	9.56458	9.54642	9.55535	9.67288	9.40949	9.47922	9.59043	9.41593	9.22987	9.39784	9.37674	9.76803	8.20558	9.96117
A_09_P023416	euchromatic gene	8.92332	7.69392	9.10665	8.50151	8.75951	8.5796	9.15009	8.96815	8.56503	8.80718	8.53876	8.58416	8.62286	8.54604	8.54654	8.53404	8.66885	8.61735	8.96155	7.88683	8.88784
A_09_P023421	euchromatic gene	9.54137	7.97498	10.0915	8.96936	9.62566	9.72733	9.92084	9.57672	9.72116	9.55355	9.86399	9.23436	9.40467	9.38744	9.46905	9.37266	9.47292	9.48181	9.6641	8.2662	9.68234
A_09_P023426	euchromatic gene	9.2884	7.78496	9.75108	8.6973	9.53766	9.62054	9.71537	9.42623	9.50449	9.39592	9.7173	11.1273	9.10556	9.39716	9.25084	9.17608	9.1548	9.23851	9.68585	8.02249	9.50092
A_09_P023431	euchromatic gene	9.1958	7.76862	9.08236	8.71892	9.3112	9.44969	9.68404	9.24946	9.42892	9.18214	9.52798	8.97392	9.09765	9.29792	9.29132	9.07717	9.03688	9.00989	9.25229	8.07565	9.33168
A_09_P023436	euchromatic gene	10.6561	8.83804	10.5432	9.38575	10.5796	10.8663	10.8567	10.7639	10.9539	10.717	11.1199	10.1443	10.3138	10.6665	10.7845	10.6989	10.0828	10.6153	10.4572	9.08556	10.5631
A_09_P023441	euchromatic gene	9.60206	8.23749	9.91619	8.64316	9.71303	9.60169	9.7496	9.47425	9.74075	9.38322	9.79359	9.26115	9.34834	9.18123	9.27132	9.01138	9.23102	9.16892	9.58556	8.90354	9.62334
A_09_P023446	euchromatic gene	9.41112	7.77424	8.9442	8.20939	9.1075	9.14898	9.5375	9.26656	9.20382	9.29873	9.30823	8.89018	9.09562	9.13834	8.97336	9.12444	9.01111	9.09779	9.19524	8.33508	9.12113
A_09_P023451	euchromatic gene	9.4507	8.1343	9.71824	8.95201	9.53249	9.42519	9.61249	9.39258	9.56363	9.46427	9.54506	9.25247	9.51489	9.3295	9.37606	9.22406	9.30452	9.33819	9.8999	8.33599	9.56452
A_09_P023456	euchromatic gene	9.54376	8.21625	9.94594	8.82351	9.58517	9.77078	9.74317	9.69883	9.69155	9.61872	9.88903	9.466	9.43491	9.66256	9.42479	9.53659	9.4128	9.51638	9.86292	8.3077	9.73609
A_09_P023461	euchromatic gene	8.77767	7.53712	9.18878	8.27642	8.88603	8.9416	9.24277	8.80087	9.10048	8.70586	9.15199	8.7197	8.72939	8.58441	8.57606	8.41891	8.85776	8.58943	8.88321	7.80161	8.91072
A_09_P023466	euchromatic gene	8.49547	7.44147	8.84345	8.0141	8.79891	8.9775	9.02032	8.47165	8.70465	8.47251	9.03232	8.76166	8.84087	8.62959	8.56161	8.4944	8.73495	8.37014	8.82916	7.67324	8.84803
A_09_P023471	euchromatic gene	10.4113	8.61738	10.7494	9.04305	10.6651	10.6918	10.6431	10.2562	10.7884	10.3281	11.1323	10.191	10.1254	10.1856	10.3413	10.0078	10.0396	10.1323	10.4267	8.77115	10.5797
A_09_P023476	euchromatic gene	10.0794	8.2181	9.97082	8.89983	9.89993	9.9074	10.3545	9.94518	10.0173	10.1142	10.0759	9.84175	9.90204	9.95251	9.94325	9.7311	9.76293	9.92034	10.1604	8.57186	10.2109
A_09_P023481	euchromatic gene	9.15633	7.76345	9.6028	8.55319	9.31819	9.38199	9.48145	8.94167	9.3446	9.15381	9.44184	9.58111	9.02698	9.0521	8.92484	8.92156	8.90371	9.00164	9.50815	8.17816	9.31256
A_09_P023486	euchromatic gene	8.86164	7.58701	8.72886	8.11489	8.78068	8.74989	9.42543	8.79091	8.90512	8.96344	8.96935	8.75348	8.89312	8.97883	8.80885	8.66862	8.8572	8.79641	9.05377	7.887	9.05526
A_09_P023491	euchromatic gene	9.68409	8.13676	9.54893	8.53095	9.57649	9.51564	9.89887	9.71563	9.69974	9.83637	9.7202	9.36403	9.4216	9.63738	9.53405	9.58938	9.31404	9.59895	9.67297	8.36075	9.77412
A_09_P023496	euchromatic gene	9.85324	8.04485	9.80668	8.89435	9.62039	9.45196	10.0694	9.57115	9.55062	9.779	9.71275	9.52229	9.60396	9.58803	9.49098	9.32084	9.49283	9.43249	9.7916	8.3834	9.81945
A_09_P023501	euchromatic gene	9.17281	7.89576	8.90729	8.46002	9.10075	8.97442	9.569	9.30413	9.1101	9.26656	9.10254	8.90447	9.10244	9.09083	9.0683	9.05344	9.01776	9.0543	9.28519	8.46088	9.30938
A_09_P023506	euchromatic gene	9.72765	8.17883	9.64071	8.80989	9.69842	9.69706	9.85918	9.80614	9.63818	9.70189	9.6996	9.38876	9.41217	9.49957	9.58709	9.529	9.32267	9.54652	9.6627	8.58386	9.68732
A_09_P023511	euchromatic gene	11.1645	11.0344	12.8178	12.5494	12.7572	12.669	10.459	12.5663	12.6384	12.3306	12.7987	11.3891	11.1592	11.4611	11.5782	12.2061	11.5882	12.4	11.1487	11.0471	11.3102
A_09_P023521	euchromatic gene	9.80037	8.08648	9.71897	8.58398	9.74804	9.99115	10.1985	9.63567	9.96144	9.79823	10.0243	9.52185	9.65016	9.58838	9.54393	9.61563	9.55653	9.53987	9.80032	8.29475	9.89241
A_09_P023526	euchromatic gene	10.4755	8.71918	9.87416	8.56171	10.3898	10.2136	10.4333	10.327	10.3318	10.3934	10.5558	9.83099	9.92287	10.1251	10.2331	10.0136	9.7139	10.0967	10.0202	8.411	10.1395
A_09_P023531	euchromatic gene	10.0735	8.41885	10.2102	9.45162	9.79995	9.83662	10.3233	9.95544	9.89701	10.013	10.0148	9.77852	9.9214	9.90705	9.70491	9.74044	9.85411	9.78404	10.2428	8.9508	10.2121
A_09_P023536	euchromatic gene	8.85136	7.83706	9.41882	8.6472	8.98655	8.96156	9.28622	8.77618	8.97927	9.09824	9.05637	8.86177	9.08205	8.92012	8.8419	8.64421	8.88205	8.95481	9.0084	8.10921	8.99994
A_09_P023541	euchromatic gene	8.01659	7.10026	8.07992	7.66088	8.14728	8.16094	8.60932	8.23857	8.22354	8.0675	8.29253	8.10617	8.30356	8.21682	8.05129	8.07109	8.17283	8.08505	8.1838	7.39808	8.32712
A_09_P023546	euchromatic gene	9.84765	9.16208	10.0122	9.30656	10.1531	10.354	10.0566	10.2566	10.2398	10.1239	10.5501	9.74574	9.96501	9.76096	10.142	10.113	9.52345	9.99566	9.9674	9.84223	10.2075
A_09_P023551	euchromatic gene	9.18959	7.68436	9.15036	8.48746	9.18507	8.95736	9.49665	9.34465	9.01662	9.32607	9.1801	8.92682	9.0594	9.179	9.18031	9.02682	8.99604	9.16937	9.30128	8.1977	9.30348
A_09_P023556	euchromatic gene	9.96517	8.27899	10.2081	9.07763	9.86015	9.81106	10.3489	9.98862	9.94753	10.0804	10.1006	9.85924	9.96488	9.97772	10.1207	9.72508	9.86273	9.88997	10.1836	8.7222	10.1991
A_09_P023561	euchromatic gene	9.14593	7.75511	9.40988	8.51557	9.46374	9.66433	9.40751	9.46239	9.59119	9.38712	9.82182	10.0613	8.96854	9.38084	9.27557	9.23296	8.95962	9.30086	9.46507	7.97892	9.27199
A_09_P023566	euchromatic gene	10.0329	8.22327	9.89268	8.63964	10.0231	9.70879	9.87665	9.71031	10.0562	9.58685	10.1934	9.6954	9.76599	9.60531	9.63707	9.23597	9.58703	9.4536	9.91645	8.54399	9.84682
A_09_P023571	euchromatic gene	9.25632	7.8336	8.648	8.25964	8.88991	8.90094	9.59205	9.14216	9.05318	9.14245	9.10864	8.91031	9.04588	9.06765	8.91395	8.89917	9.07166	9.01608	9.30976	8.09404	9.34408
A_09_P023576	euchromatic gene	9.11316	7.65879	9.26169	8.46982	9.06223	8.90942	9.65318	8.92251	8.89573	9.05311	8.89144	9.05356	9.02968	9.1393	9.01588	8.90791	8.78012	8.8942	9.17985	7.83327	9.35713
A_09_P023581	euchromatic gene	9.01877	7.53197	9.55118	8.6204	9.27407	9.32981	9.3303	8.92104	9.1321	9.02564	9.29105	8.85966	8.9198	8.65439	8.6287	8.77808	8.85962	8.92395	9.13247	7.90521	9.03891
A_09_P023586	euchromatic gene	9.5289	7.94756	9.81997	8.96494	9.3944	9.38837	9.73237	9.47353	9.35405	9.41179	9.38147	9.13358	9.21635	9.21016	9.1491	9.13956	9.17239	9.24504	9.48296	8.33022	9.45458
A_09_P023591	euchromatic gene	9.75353	8.12096	9.65356	8.74003	9.4987	9.56464	9.97607	9.69129	9.6897	9.66407	9.86117	9.39054	9.50871	9.6558	9.72719	9.65153	9.33437	9.60029	9.69417	8.27006	9.72824
A_09_P023596	euchromatic gene	8.22316	7.27472	8.23273	7.93933	8.14041	8.22557	8.20769	7.97788	8.18685	7.8581	8.27989	7.83111	7.94338	8.11557	7.89335	7.97488	7.99119	7.99945	8.09345	7.34035	8.22106
A_09_P023601	euchromatic gene	11.3302	9.9463	11.4476	10.231	11.4022	11.3854	10.8503	11.1627	11.4029	11.2364	11.6679	10.5104	10.5458	10.9666	11.3035	10.9824	10.3483	11.0931	10.6146	9.51785	10.9177
A_09_P023606	euchromatic gene	9.50112	8.34957	10.2781	9.4949	9.47728	9.47282	9.69109	9.41122	9.44336	9.32862	9.50161	9.37514	9.29183	9.28752	9.31008	9.20015	9.17361	9.17154	9.42091	8.45431	9.59163
A_09_P023611	euchromatic gene	9.16841	7.9777	9.55226	8.56534	9.50025	9.5701	9.62658	9.23778	9.4612	9.32413	9.59703	9.30682	8.94106	9.2469	9.2078	8.99316	9.01153	9.06432	9.35449	8.31012	9.30717
A_09_P023616	euchromatic gene	8.24899	7.54689	8.89164	8.6965	8.72209	8.83199	8.78913	8.58359	8.85263	8.6342	8.9241	8.31939	8.65219	8.45222	8.60085	8.77922	8.38907	8.7061	8.51173	7.83972	8.46743
A_09_P023621	euchromatic gene	9.99693	8.89239	9.3883	8.71006	9.52538	9.42147	9.80865	9.86642	9.58369	9.93716	9.64447	9.33724	9.38417	9.86761	9.83303	9.7972	9.26237	9.66123	9.48033	8.73701	9.61281
A_09_P023626	euchromatic gene	10.3204	8.38298	10.5208	9.13417	10.1658	10.3498	10.7057	10.4333	10.4073	10.2294	10.5104	9.9421	10.0482	10.0784	10.1131	10.055	9.95219	10.0307	10.3865	8.71765	10.3256
A_09_P023631	euchromatic gene	9.98849	8.26716	9.27935	8.36046	9.7072	9.60297	9.97579	9.88568	9.73982	10.0249	9.84644	9.35289	9.4155	9.93615	9.80106	9.52146	9.30035	9.69139	9.55833	8.23637	9.76184
A_09_P023636	euchromatic gene	9.87047	8.36471	9.58794	8.55243	9.66807	9.79625	10.1978	9.85402	9.92399	9.91117	10.077	9.65416	9.82773	9.77819	9.75148	9.71277	9.62857	9.72221	9.86625	8.79168	10.1806
A_09_P023641	euchromatic gene	10.5205	8.69803	10.309	9.50987	10.6859	10.8706	10.8498	10.5919	10.9038	10.4751	11.0974	10.2968	10.2954	10.3466	10.2697	10.2437	10.1395	10.1469	10.6734	8.90296	10.5611
A_09_P023646	euchromatic gene	8.81537	7.62335	9.32499	8.45449	8.83527	8.74128	9.08857	9.22248	8.74133	9.07478	8.81226	8.772	8.86709	8.94681	9.01492	8.90236	8.86787	8.87302	9.09081	7.95309	8.85998
A_09_P023651	euchromatic gene	8.80275	7.49685	8.9708	8.42193	8.99556	9.00533	8.9468	8.8934	8.74615	8.81829	8.86788	8.60504	8.51443	8.6068	8.55386	8.53395	8.78905	8.73001	8.84454	7.8494	8.62464
A_09_P023656	euchromatic gene	10.479	8.77265	9.96636	8.8778	10.512	10.8508	9.64449	10.337	10.6241	10.3067	10.8657	9.49155	9.47661	10.2824	9.89681	10.0796	9.47169	9.93088	9.83545	8.23321	10.0011
A_09_P023661	euchromatic gene	10.7102	9.51197	11.4917	10.7226	11.028	10.9197	10.5925	10.7708	10.8715	10.7744	11.0984	10.2344	10.2851	10.4447	10.6377	10.7763	10.2554	10.7071	10.7091	9.64724	10.8695
A_09_P023666	euchromatic gene	8.46033	7.33971	9.40642	8.5385	8.62035	8.60966	8.67007	8.42026	8.35829	8.48403	8.37599	8.34335	8.42395	8.2789	8.31982	8.34723	8.78775	8.43116	8.72511	7.52085	8.64864
A_09_P023671	euchromatic gene	9.88741	7.98812	9.51908	8.47987	9.67429	9.55359	10.1269	9.61298	9.6843	9.80896	9.73518	9.48483	9.55369	9.6487	9.5222	9.39873	9.42322	9.39922	9.70728	8.45321	9.77853
A_09_P023676	euchromatic gene	9.32082	7.80013	9.65932	8.85516	9.32931	9.38995	9.60279	9.06911	9.13404	9.22173	9.11446	9.10936	9.09416	9.10785	8.99012	9.09063	9.2281	9.11606	9.40715	8.08743	9.46195
A_09_P023681	euchromatic gene	9.68511	8.03051	9.67486	8.52449	9.65714	9.38391	9.96419	9.59808	9.55261	9.45208	9.61558	9.38916	9.49375	9.29683	9.45421	9.1632	9.37051	9.22339	9.76212	8.35867	9.70706
A_09_P023686	euchromatic gene	9.42044	8.08124	9.77714	8.70918	9.45901	9.59666	9.74987	9.38774	9.58703	9.23227	9.61039	9.2759	9.22585	9.15443	9.24233	9.25126	9.12761	9.13398	9.41937	8.17047	9.51587
A_09_P023691	euchromatic gene	8.90479	7.98661	9.16604	8.17365	9.0192	9.18222	9.54751	8.85044	9.09456	8.93879	9.26215	9.01171	9.09168	8.91441	9.1709	8.67096	8.93985	8.80791	9.27317	7.96994	9.39138
A_09_P023696	euchromatic gene	9.48871	8.69961	10.469	10.2293	10.4734	10.4302	9.92336	10.1999	10.2411	10.1481	10.187	9.43495	9.43818	10.0447	10.0576	10.6944	9.4839	10.3115	9.6241	9.31775	10.1072
A_09_P023701	euchromatic gene	10.2785	8.68559	10.5139	9.43369	10.2662	10.4093	10.6289	10.3116	10.3239	10.2885	10.4748	10.1479	10.169	10.0641	10.1495	10.1386	10.0477	10.0079	10.4251	9.10807	10.3959
A_09_P023706	euchromatic gene	10.7099	8.81119	11.2511	9.41648	10.5984	10.5232	10.803	10.9184	10.7708	10.6856	10.8021	10.236	10.644	10.4831	10.6778	10.7341	10.0915	10.3318	10.8078	8.96985	10.889
A_09_P023711	euchromatic gene	10.2628	8.35289	10.3105	9.46443	10.0509	10.1696	10.3342	9.91511	10.1128	9.79823	10.299	9.8967	9.9716	9.99205	9.85309	9.84147	9.92319	9.68698	10.2074	8.74879	10.1275
A_09_P023716	euchromatic gene	9.10406	7.82602	9.33335	8.38277	8.98781	9.02978	9.26204	9.26918	8.89389	9.21533	9.11678	8.95961	9.09558	8.94155	9.16763	9.11763	9.06969	9.04848	9.24601	8.09848	9.29574
A_09_P023721	euchromatic gene	8.81772	7.46394	8.84561	8.14966	8.72508	8.81327	9.18172	8.6817	8.91376	8.64425	8.84498	8.63385	8.80935	8.77105	8.60408	8.5212	8.74277	8.55804	8.9694	7.96997	8.95177
A_09_P023726	euchromatic gene	9.51261	7.87139	8.95951	8.27456	9.21732	9.15525	9.28231	9.33916	8.9044	9.40378	8.79854	8.97905	9.10567	9.23829	9.20068	9.0273	8.37702	9.08512	8.9663	7.88991	9.03284
A_09_P023731	euchromatic gene	9.81126	8.3062	10.2416	8.98896	9.79391	9.93181	10.1544	9.9297	10.0856	10.0142	10.1659	9.64204	9.73934	9.74904	9.89615	9.89944	9.57473	9.89821	9.98742	8.51886	10.0196
A_09_P023736	euchromatic gene	9.78174	8.04182	10.284	9.1106	9.8247	9.86351	10.171	9.91275	9.76905	9.86358	9.95056	9.53527	9.67987	9.6728	9.76952	9.64342	9.45274	9.55206	9.85342	8.43501	9.85903
A_09_P023741	euchromatic gene	9.38199	8.43359	10.0062	9.3155	9.50184	9.16652	9.69983	10.1617	9.48893	9.55393	9.59842	9.41851	9.59161	9.3673	9.64839	9.36185	10.1419	9.557	9.79595	9.47767	9.94838
A_09_P023746	euchromatic gene	8.62562	7.47172	8.76896	8.08102	8.5063	8.62682	8.9013	8.67643	8.73432	8.55407	9.00177	8.51172	8.64647	8.70091	8.67261	8.66877	8.53722	8.64408	8.76029	7.69597	8.64359
A_09_P023751	euchromatic gene	9.69123	8.04264	9.01454	8.35896	9.4243	9.31217	9.43657	9.40858	9.34936	9.44196	9.39392	8.84255	8.8905	9.33392	9.33149	9.12972	8.89902	9.20299	9.23302	8.24697	9.36524
A_09_P023756	euchromatic gene	9.08745	7.61507	9.05405	8.22458	8.90996	8.81819	9.36722	8.8254	8.95797	8.92341	8.86208	8.81291	8.94892	8.77704	8.68388	8.74565	8.81816	8.77446	9.0787	8.00291	9.12963
A_09_P023761	euchromatic gene	10.582	9.34785	11.1474	11.4278	11.3697	11.3484	11.1077	11.0866	11.3805	11.3237	11.6032	10.5172	10.6297	10.7763	11.0631	11.2794	10.5725	11.2423	10.6875	10.2027	10.9373
A_09_P023766	euchromatic gene	8.99504	7.49402	8.5851	7.94993	8.74747	8.87661	9.11914	9.02149	8.73811	8.97529	8.73218	8.57777	8.80496	8.69645	8.67203	8.6392	8.70658	8.78106	8.98384	7.70004	8.96399
A_09_P023771	euchromatic gene	10.0038	8.48533	10.6607	9.80904	10.2585	10.3428	10.6041	10.0665	10.1117	9.98536	10.2895	9.8363	9.88237	9.90427	9.85262	9.98437	9.81096	9.81064	10.0556	8.8384	10.2636
A_09_P023776	euchromatic gene	9.42201	7.97477	9.93866	8.60269	9.40631	9.63794	9.56093	9.53284	9.61135	9.32588	9.73003	9.32102	9.44839	9.33679	9.41672	9.4047	9.21595	9.20487	9.50254	8.16932	9.50271
A_09_P023781	euchromatic gene	9.3956	7.91927	9.88813	8.88106	9.51766	9.59553	9.91576	9.55823	9.65054	9.4402	9.68897	9.32553	9.45276	9.47215	9.33626	9.27965	9.35916	9.36288	9.63105	8.26645	9.65674
A_09_P023786	euchromatic gene	8.60145	7.51597	9.29839	8.31984	8.78011	8.85273	9.00688	8.56617	8.97901	8.42632	9.07651	8.45577	8.71773	8.64056	8.4867	8.56639	8.69989	8.58897	8.9573	7.59208	8.95972
A_09_P023791	euchromatic gene	9.79088	8.32965	10.4212	9.47349	10.2085	10.4061	10.0379	10.0703	10.1761	9.88372	10.3279	9.59065	9.49823	9.95121	9.78101	9.97916	9.47993	9.89594	9.79172	8.5534	9.86303
A_09_P023796	euchromatic gene	9.50105	8.06998	10.0197	9.23809	9.47792	9.46394	9.67247	9.5512	9.62855	9.40667	9.66044	9.23882	9.27155	9.22718	9.39524	9.26684	9.17217	9.29841	9.74238	8.49747	9.77193
A_09_P023801	euchromatic gene	9.40214	7.8737	9.52843	8.75508	9.39555	9.36471	9.64441	9.46046	9.45096	9.40742	9.39644	9.00446	9.16289	9.07812	9.11119	9.01549	9.08877	9.14355	9.41742	8.25281	9.39234
A_09_P023806	euchromatic gene	8.56271	7.33847	9.20751	8.58879	8.58363	8.62708	8.87268	8.57106	8.48988	8.4589	8.6377	8.39725	8.56376	8.48625	8.31768	8.49112	8.72121	8.57737	8.71308	7.55809	8.46319
A_09_P023811	euchromatic gene	9.74472	8.05185	10.0118	9.09681	9.78409	9.58241	10.0069	9.82695	9.78964	9.84529	9.81419	9.58464	9.71854	9.72023	9.78426	9.5864	9.5671	9.61106	10.0136	8.56291	10.0653
A_09_P023816	euchromatic gene	10.8422	9.79109	11.5806	11.163	11.3673	11.3271	11.3678	11.2233	11.1986	11.2378	11.2513	10.8686	10.8208	10.9713	11.1147	10.9939	10.7242	11.1714	10.854	10.3597	11.2375
A_09_P023821	euchromatic gene	9.42339	7.78694	9.52301	8.48655	9.41973	9.44632	10.1861	9.63908	9.52145	9.60571	9.6345	9.14482	9.30028	9.25578	9.13491	9.29094	9.29312	9.37204	9.58478	8.26149	9.49857
A_09_P023826	euchromatic gene	8.85187	7.67499	8.79917	8.12263	8.82121	8.793	9.40406	8.97953	8.89627	8.82097	8.95551	8.66625	8.8615	8.84447	8.63288	8.82309	8.79028	8.69172	8.9602	8.23518	8.90959
A_09_P023831	euchromatic gene	9.54958	8.06733	9.73974	8.90906	9.37991	9.60778	9.82083	9.4275	9.52982	9.56105	9.50629	9.33163	9.38774	9.79755	9.84106	9.37676	9.34695	9.40981	9.67276	8.56449	9.70227
A_09_P023836	euchromatic gene	8.95047	7.77624	9.46317	8.68552	8.86522	8.96249	9.23462	8.73678	8.9839	8.79465	9.11988	8.76134	8.90029	9.0349	8.93089	8.68439	8.87316	8.66116	9.09179	7.95797	9.02643
A_09_P023841	euchromatic gene	9.13357	7.88075	9.64455	8.92824	9.10931	9.38867	9.45905	9.0545	9.01787	9.19289	9.26301	8.99265	9.03138	8.9673	8.90553	9.0624	8.9545	9.15601	9.21553	7.99817	9.31898
A_09_P023846	euchromatic gene	9.69773	7.94502	9.47438	8.71624	9.44486	9.62383	10.0686	9.77582	9.58593	9.61274	9.65917	9.26271	9.49823	9.39131	9.26835	9.02282	9.26568	9.26664	9.8521	8.37979	9.74034
A_09_P023851	euchromatic gene	9.19869	8.23145	9.99735	9.44087	9.63754	9.78288	9.32487	9.44793	9.83161	9.2756	10.0559	9.05895	8.88028	9.3843	9.42534	9.56672	9.04636	9.40338	9.17981	8.43984	9.30145
A_09_P023856	euchromatic gene	9.93873	8.14691	9.94521	8.66223	9.85199	9.82126	9.96616	9.92975	9.8215	9.8191	9.97212	9.50148	9.5284	9.78734	9.77385	9.57969	9.44488	9.56714	9.79551	8.26161	9.77516
A_09_P023861	euchromatic gene	10.4449	9.23603	10.6598	10.0429	10.4951	10.4069	10.8568	10.4262	10.4624	10.3884	10.5387	10.1882	10.2582	10.2984	10.3612	10.4095	10.1099	10.3034	10.2111	9.55614	10.5775
A_09_P023866	euchromatic gene	10.3765	9.16871	10.5407	9.56787	10.0167	9.9386	11.0044	10.4268	10.0874	10.6579	10.1401	10.3345	10.3735	10.371	10.52	10.5063	10.2546	10.4829	10.5237	9.70842	10.9165
A_09_P023871	euchromatic gene	10.0322	8.33131	10.1233	9.29736	9.60758	9.50872	10.3048	9.8587	9.54262	9.8771	9.63426	9.6522	9.74109	9.56206	9.60674	9.45958	9.6428	9.55696	9.95638	8.67874	10.0681
A_09_P023876	euchromatic gene	9.30558	7.65283	9.09745	8.38769	9.20435	9.15387	9.48114	9.15248	9.14164	9.25837	9.14647	8.64195	8.76517	9.02019	8.96139	8.93635	8.70416	8.9656	8.92641	7.70281	9.07817
A_09_P023881	euchromatic gene	9.84597	8.66448	9.38767	8.74243	9.37111	9.34226	10.0591	9.72552	9.36299	9.81935	9.35013	9.53706	9.60872	9.57652	9.48136	9.37436	9.48835	9.49258	9.86581	8.76927	9.98794
A_09_P023886	euchromatic gene	9.82063	8.48467	10.0306	9.1642	9.96221	10.1924	9.78381	9.80184	10.0009	9.8917	10.1375	8.93889	9.0629	9.82024	9.71196	9.74325	9.01344	9.62385	9.27635	7.92937	9.27563
A_09_P023891	euchromatic gene	10.2337	9.44041	10.3495	10.317	10.3682	10.3638	11.8052	10.8182	10.5765	11.5151	10.6076	10.9288	10.996	10.7823	10.8384	11.6199	11.2917	11.4576	11.386	11.1407	11.6077
A_09_P023896	euchromatic gene	8.49488	7.19693	8.74751	8.29695	8.50455	8.25685	8.96667	8.40025	8.35834	8.4872	8.27002	8.3627	8.51119	8.57782	8.47642	8.2398	8.43265	8.38542	8.5024	7.48914	8.52259
A_09_P023901	euchromatic gene	9.52697	7.68066	9.08526	8.1703	8.97843	8.9492	9.40861	9.13898	9.15759	9.28405	9.24804	8.91705	9.07248	9.06979	8.86547	8.8968	8.97641	8.9555	9.39124	8.12615	9.19648
A_09_P023906	euchromatic gene	8.81691	7.49201	9.04978	8.53021	8.8571	8.75132	9.01062	8.63189	8.75736	8.72462	8.7431	8.54134	8.69566	8.6024	8.58664	8.40886	8.61104	8.63602	8.93383	7.77915	8.88943
A_09_P023911	euchromatic gene	9.01578	7.78281	9.29124	8.95474	9.15444	9.3862	9.05288	9.02629	9.48195	9.08805	9.64367	8.80571	8.92336	8.86077	8.95972	8.78666	8.87356	8.99014	8.97928	7.97953	9.00265
A_09_P023916	euchromatic gene	9.47456	7.87642	9.30118	8.71802	9.24002	9.25598	9.94912	9.45742	9.29271	9.53506	9.33639	9.17804	9.44074	9.32872	9.22488	9.34851	9.31381	9.385	9.55407	8.42208	9.60783
A_09_P023921	euchromatic gene	9.32374	8.44656	10.533	9.83098	9.92267	9.92989	9.53348	9.57964	9.93393	9.58674	10.183	9.0967	9.12916	9.33109	9.58462	9.56034	9.15169	9.59415	9.30665	8.72636	9.5875
A_09_P023926	euchromatic gene	8.83031	7.51187	9.38675	8.49724	8.79513	8.90203	9.04537	8.79882	8.83442	8.6077	9.02217	8.5085	8.74744	8.60671	8.41843	8.61658	8.58333	8.48898	9.02003	7.63446	8.79417
A_09_P023931	euchromatic gene	9.2333	7.82302	8.98866	8.38333	8.9881	9.02224	9.38498	8.8178	9.08071	8.87082	9.14758	8.94971	9.05078	9.03371	8.86002	8.7237	9.03443	8.84447	9.36924	8.04477	9.20977
A_09_P023936	euchromatic gene	9.55296	7.90939	9.42779	8.71316	9.43864	9.30441	9.8274	9.21324	9.4183	9.38357	9.45489	9.10508	9.15881	9.34984	9.16929	9.05237	9.19851	9.105	9.3238	8.41224	9.49962
A_09_P023941	euchromatic gene	9.01955	7.55948	8.88947	8.14746	8.99538	8.92728	9.28158	8.73543	9.16805	8.94123	9.20107	8.7242	8.85771	8.86438	8.72577	8.73434	8.67482	8.66043	8.95654	7.73795	8.89305
A_09_P023946	euchromatic gene	9.24333	7.97383	9.39228	8.39742	9.27221	9.14599	9.52108	9.01848	9.20961	9.05833	9.37879	8.85143	9.143	9.00808	8.95777	8.86031	9.15308	9.00761	9.33726	8.17826	9.27383
A_09_P023951	euchromatic gene	9.27059	7.88554	9.90778	8.842	9.47907	9.59532	9.3	9.30474	9.44301	9.3948	9.77174	8.87963	9.10399	9.16179	9.34069	9.13709	8.90271	9.11972	9.08034	7.83519	9.10225
A_09_P023956	euchromatic gene	9.72039	7.95816	10.0749	8.79202	9.57234	9.55176	10.0538	9.77082	9.68142	9.67242	9.78146	9.47792	9.53411	9.36283	9.52352	9.63912	9.32749	9.58167	9.88652	8.33369	9.93828
A_09_P023961	euchromatic gene	9.5749	7.86176	9.6029	8.59421	9.52166	9.38691	9.92633	9.61057	9.48419	9.48901	9.62864	9.34454	9.50215	9.40457	9.63302	9.54057	9.32844	9.34806	9.65701	8.26148	9.81314
A_09_P023966	euchromatic gene	9.65582	8.30064	9.22717	8.40906	9.29799	9.24732	9.92553	9.35289	9.34664	9.57056	9.59218	9.1806	9.32022	9.32716	9.2722	9.14427	9.27339	9.24517	9.41354	8.27615	9.61293
A_09_P023971	euchromatic gene	9.30751	7.74888	9.25128	8.35139	9.09991	8.99885	9.88604	9.31397	9.23824	9.49525	9.23195	9.12426	9.28651	9.06921	9.10572	9.23426	9.20563	9.24282	9.49331	8.199	9.45941
A_09_P023976	euchromatic gene	9.87337	8.2167	10.0131	9.01797	10.1191	10.21	10.3354	9.90603	10.2581	9.89314	10.4537	9.55861	9.70459	9.79948	9.64545	9.64799	9.66551	9.73472	9.91642	8.48068	9.99533
A_09_P023981	euchromatic gene	10.0829	8.2198	9.75646	8.64889	10.013	10.0191	10.1207	9.75879	10.2316	9.93933	10.3315	9.67561	9.68516	9.80439	9.7619	9.6391	9.54575	9.6133	9.83875	8.26926	9.93352
A_09_P023986	euchromatic gene	9.44814	7.80263	10.0683	9.18621	9.40494	9.55752	9.65978	9.1229	9.57088	9.33796	9.63609	9.2352	9.17727	9.15159	9.08509	9.19137	9.22446	9.16456	9.44711	8.09832	9.42456
A_09_P023991	euchromatic gene	9.72378	8.64394	9.98207	9.01817	9.76637	10.0352	9.8242	9.72593	9.92076	9.56374	10.1884	9.54036	9.58056	9.58466	9.4005	9.50313	9.46919	9.38669	9.81242	8.48666	9.80712
A_09_P023996	euchromatic gene	8.29806	7.21184	8.97411	8.40138	8.25034	8.16082	8.54336	8.41521	8.11777	8.33102	8.12627	8.14777	8.2533	8.16608	8.15195	8.19688	8.31496	8.20753	8.45771	7.43537	8.27274
A_09_P024001	euchromatic gene	10.2445	8.76874	10.6854	9.39162	10.22	10.3089	10.3897	10.1799	10.444	10.0794	10.5059	9.99119	9.95522	9.97913	9.90276	9.8636	9.97178	9.83237	10.2534	8.81268	10.2675
A_09_P024011	euchromatic gene	9.67436	7.94021	9.51725	8.56151	9.47154	9.43896	9.84466	9.49484	9.61754	9.75389	9.65806	9.34629	9.50306	9.52432	9.34932	9.26534	9.37594	9.57413	9.66104	8.37698	9.70231
A_09_P024016	euchromatic gene	9.99929	8.07292	10.1938	9.13653	9.6799	9.56237	10.1402	9.72461	9.69206	9.85613	9.68016	9.4848	9.57245	9.67327	9.53763	9.34963	9.39279	9.49517	9.74154	8.35321	9.88805
A_09_P024026	euchromatic gene	10.0542	8.20406	10.5405	9.47377	9.66553	9.71138	10.1912	9.7926	9.79959	9.78913	9.81711	9.66526	9.70404	9.77431	9.97062	9.64361	9.59481	9.62026	9.9562	8.44278	10.028
A_09_P024031	euchromatic gene	10.5461	9.16824	10.4118	9.57631	10.361	10.7266	10.3674	10.4578	10.6728	10.2517	10.9217	10.0072	9.88487	10.3342	10.1157	10.2154	9.87269	10.1036	10.1491	8.9661	10.1844
A_09_P024036	euchromatic gene	9.64848	8.28405	9.91702	8.90567	9.74696	9.92456	9.56235	9.51959	9.84152	9.70102	9.91015	9.15296	9.03155	9.46029	9.36942	9.50505	9.02907	9.52586	9.32455	8.06852	9.29133
A_09_P024041	euchromatic gene	9.76251	8.01852	9.76994	9.03497	9.58705	9.52181	9.91447	9.67318	9.61294	9.6579	9.76096	9.24806	9.43479	9.43667	9.62867	9.29478	9.36737	9.49473	9.6697	9.4336	9.78605
A_09_P024046	euchromatic gene	9.55812	8.75921	10.4475	9.61085	10.0662	9.72296	10.3519	10.3552	9.73261	9.65604	9.79965	9.50397	9.48621	9.31323	9.52438	9.33794	9.55402	9.46427	9.71859	9.75116	10.1415
A_09_P024051	euchromatic gene	9.74945	8.19181	10.4178	9.09249	9.85165	9.71851	10.0356	9.66987	9.86137	9.83125	9.90636	9.36086	9.54281	9.49343	9.51247	9.32718	9.51795	9.46307	9.75316	9.5788	9.97635
A_09_P024056	euchromatic gene	8.88474	7.85013	9.41544	8.85212	9.12814	9.00761	9.26784	8.78988	8.89951	8.86822	9.02278	8.69416	8.92039	8.69433	8.67189	8.92437	8.86849	8.8147	9.25435	8.79835	9.10974
A_09_P024061	euchromatic gene	9.59343	9.17837	10.3948	10.291	10.5168	10.5269	9.43453	9.83042	10.478	9.46282	10.4225	8.98722	9.01462	9.63795	9.73434	9.87505	9.85786	9.6388	8.88137	9.86869	10.128
A_09_P024071	euchromatic gene	8.42796	7.3362	8.61524	8.19173	8.41513	8.36215	8.82499	8.40424	8.36692	8.25907	8.52823	8.38563	8.42629	8.47304	8.28774	8.14246	8.41835	8.25421	8.60814	8.39964	8.50185
A_09_P024076	euchromatic gene	9.49588	8.05751	9.6631	8.65097	9.61278	9.80699	10.0938	9.6741	9.76798	9.37551	10.0557	9.60313	9.56242	9.56097	9.56846	9.5258	9.53946	9.32855	9.78337	9.47578	9.88724
A_09_P024081	euchromatic gene	9.32686	7.74329	9.34061	8.30042	9.55883	9.71197	9.60514	9.27659	9.68022	9.35003	9.75079	8.86706	8.96444	9.35537	9.1413	9.23498	8.85953	9.12589	9.16685	8.78413	9.0102
A_09_P024086	euchromatic gene	8.19247	7.27852	8.67572	7.95792	8.34765	8.39833	8.72468	8.4811	8.28164	8.34183	8.72787	8.29837	8.43791	8.27375	7.96898	8.50782	8.46325	8.33866	8.41963	8.10123	8.71695
A_09_P024091	euchromatic gene	9.83752	8.08866	9.60998	8.62132	9.56189	9.47096	10.1552	9.09601	9.62578	9.88696	9.65639	9.444	9.63503	9.71855	9.67676	9.55794	9.46953	9.58408	9.69128	9.5271	9.83588
A_09_P024096	euchromatic gene	9.65902	7.90298	9.69185	8.70686	9.38646	9.40567	9.991	9.45874	9.51804	9.68567	9.50208	9.43725	9.42522	9.32479	9.39258	9.43915	9.29413	9.45047	9.74637	9.38574	9.68145
A_09_P024101	euchromatic gene	9.6992	8.09609	9.73255	9.0561	9.45114	9.4	10.1954	9.58906	9.46077	9.79067	9.54656	9.58939	9.73183	9.67656	9.58071	9.47447	9.51513	9.48206	9.71323	9.57654	9.82623
A_09_P029426	euchromatic gene	9.44036	7.81958	9.87114	9.07746	9.66884	9.63151	9.73869	9.51499	9.6631	9.58715	9.75817	9.28435	9.39362	9.3944	9.4913	9.29804	9.19544	9.27594	9.52662	8.3935	9.77204
A_09_P029431	euchromatic gene	9.14334	7.83186	9.72271	8.83998	9.4309	9.43733	9.61689	9.55038	9.54084	9.31212	9.43029	8.87668	9.01377	9.15422	9.01454	9.16127	8.961	9.11077	9.30961	7.93925	9.4341
A_09_P029441	euchromatic gene	9.46675	8.00644	10.0847	8.91844	9.55052	9.63301	9.65477	9.35155	9.66122	9.13358	9.67989	9.28254	9.29766	9.19617	9.05885	9.14126	9.14843	9.00113	9.52823	8.30268	9.74085
A_09_P029466	euchromatic gene	9.57511	7.83408	10.215	9.13226	9.48032	9.3309	9.63464	9.52947	9.33456	9.5096	9.2447	9.21317	9.37204	9.33529	9.26014	9.23612	9.25475	9.23358	9.71923	8.22412	9.65691
A_09_P029471	euchromatic gene	9.55057	7.98227	9.93414	8.8118	9.24987	9.17413	9.41295	9.73181	9.49714	9.12928	9.29684	9.30227	8.93546	9.08577	9.07489	9.36204	9.2878	9.4291	9.04233	8.16803	9.31023
A_09_P029496	euchromatic gene	9.47917	7.95654	9.33089	8.76008	9.46063	9.58513	10.0205	9.5113	9.00341	9.2909	9.65783	9.37985	9.43979	9.22723	9.1615	9.15928	9.33516	9.54746	9.50553	8.40804	9.95049
A_09_P029586	euchromatic gene	9.43117	7.879	9.60089	8.51587	9.66827	9.71089	10.0788	9.67327	9.68191	9.61097	9.81731	9.12168	9.30636	9.24516	9.35454	9.271	9.16608	9.37837	9.41263	8.10695	9.61712
A_09_P029591	euchromatic gene	10.7424	8.73924	10.3961	9.11356	10.4553	10.4496	10.9738	10.5017	10.5541	10.5924	10.5338	10.2235	10.3643	10.3989	10.2116	10.1989	10.1528	10.2633	10.5621	8.88448	10.5912
A_09_P029616	euchromatic gene	10.1591	8.37975	10.3395	9.15383	10.0561	10.2512	10.1955	10.0648	10.2084	10.073	10.3461	9.7848	9.82408	9.98353	10.1107	9.91765	9.59726	9.9172	10.0669	8.54726	10.3911
A_09_P029651	euchromatic gene	9.53364	7.90558	8.94358	8.40634	9.50388	9.46977	9.39963	9.26127	9.50172	9.61475	9.85728	8.96163	9.11755	9.30849	9.18718	8.96672	8.99848	9.45598	9.35375	8.2257	9.57053
A_09_P029661	euchromatic gene	9.34648	7.98354	9.40274	8.7917	8.69258	8.59797	9.40757	9.26509	8.93363	9.32209	8.89303	8.85263	9.22216	8.98597	8.97683	8.92351	8.84467	9.01497	9.09373	8.36062	9.2063
A_09_P029686	euchromatic gene	10.0949	9.39049	10.8431	10.662	11.286	10.9614	10.1574	10.721	10.8157	10.5224	10.8355	9.54249	9.51496	10.2063	10.3648	10.3802	9.40307	10.4641	9.43947	9.29373	10.1439
A_09_P029831	euchromatic gene	9.61062	8.04118	9.98063	8.81121	9.96231	10.2352	9.97377	9.51884	10.1775	9.69534	10.2621	9.41308	9.53171	9.62769	9.36057	9.53401	9.41414	9.39674	9.77791	8.37293	9.91362
A_09_P029836	euchromatic gene	10.9668	9.01846	11.1772	9.67495	10.9965	11.2698	11.2914	11.1039	11.0803	10.8505	11.3445	10.7171	10.7362	10.8174	10.7135	10.7143	10.6672	10.6151	11.1055	9.27094	11.3277
A_09_P029931	euchromatic gene	8.99682	7.81949	9.41333	8.63126	8.92687	9.12053	9.35525	9.13575	9.01337	8.8655	9.1209	8.84122	9.01815	8.8588	8.73981	8.90612	8.87055	8.76006	9.31744	8.08711	9.29977
A_09_P030046	euchromatic gene	9.93931	8.4293	10.2253	8.95063	9.99526	10.0686	9.9576	9.82432	10.0626	9.90572	10.3816	9.6121	9.74719	9.74582	9.89389	9.65818	9.61314	9.71614	9.92915	8.36685	10.0339
A_09_P030091	euchromatic gene	8.93541	7.57291	8.65653	8.01175	8.85024	8.80307	8.94275	8.8465	9.04242	8.82078	9.03703	8.36825	8.42136	8.97399	8.79144	8.63971	8.3542	8.72441	8.59188	7.37256	8.50358
A_09_P030156	euchromatic gene	9.58965	7.85734	9.56617	8.5021	9.3402	9.28511	10.014	9.48117	9.3856	9.51467	9.59759	9.29857	9.17564	9.42869	9.57823	9.1802	9.38553	9.18724	9.55128	8.29809	9.91784
A_09_P030176	euchromatic gene	10.914	9.58089	10.4453	9.87714	10.6765	10.6338	10.691	10.9185	10.7864	11.1838	10.8634	10.2073	10.2873	10.7693	10.6464	10.5415	10.1759	10.6065	10.4913	9.62181	10.5383
A_09_P030181	euchromatic gene	9.19719	7.75805	8.89711	7.90371	9.28335	9.04505	9.21189	8.86418	9.13646	8.89597	9.35302	8.94133	8.99181	8.82618	8.83273	8.4585	8.84256	8.67074	9.10338	7.92786	9.27171
A_09_P030186	euchromatic gene	9.24537	8.01181	9.62497	8.74171	9.42832	9.24616	9.53932	9.14925	9.38859	9.23393	9.58661	9.03382	9.18328	9.09395	9.15625	8.96925	9.59421	9.2411	9.43261	8.14511	9.52585
A_09_P030216	euchromatic gene	10.7076	8.74022	10.8147	9.42046	10.5631	10.693	11.1782	10.7006	10.8623	10.6652	11.0175	10.575	10.6209	10.6195	10.657	10.3797	10.4895	10.4494	10.8666	9.10691	11.119
A_09_P030226	euchromatic gene	8.94908	7.68126	9.21587	8.34846	9.2397	9.50789	9.18798	9.06325	9.51505	8.92476	9.77437	8.84192	8.92648	9.10205	8.89765	8.89876	8.87684	8.86087	9.04694	8.02459	9.25398
A_09_P030296	euchromatic gene	9.03423	7.70588	9.63631	8.72514	9.10861	9.09444	9.28136	8.92661	9.02443	8.983	9.05823	8.64934	8.91258	8.71863	8.80402	8.80487	8.75361	8.90869	9.11889	7.75548	9.24195
A_09_P030301	euchromatic gene	9.52778	7.85328	9.46667	8.56169	9.28639	9.25774	9.7924	9.52013	9.40301	9.59102	9.53817	9.15193	9.24991	9.13245	9.20164	9.31037	9.12399	9.38104	9.36165	8.15979	9.60494
A_09_P030311	euchromatic gene	9.09379	7.98893	9.79164	8.75047	9.25565	9.05547	10.9382	9.0127	9.19941	9.07663	9.34542	8.94394	9.40053	8.99194	9.00279	8.98439	9.17448	8.96128	9.27996	8.4297	9.61719
A_09_P030321	euchromatic gene	10.9303	9.57118	10.7972	10.4765	11.0579	11.0272	10.903	10.8168	11.1659	11.0089	11.1086	10.5885	10.6669	10.8343	10.7672	10.9717	10.4702	10.7705	10.7731	9.83342	11.2039
A_09_P030381	euchromatic gene	8.80964	7.46673	9.03887	8.08091	8.82568	9.00995	8.62374	8.73622	9.03935	8.74202	9.07808	8.27078	8.44548	8.66485	8.55238	8.57086	8.41525	8.57995	8.55058	7.39315	8.84656
A_09_P030386	euchromatic gene	10.4388	8.78082	10.5513	9.8501	10.4561	10.5259	10.9011	10.5259	10.5537	10.6485	10.6396	10.3219	10.3576	10.4403	10.6246	10.6116	10.285	10.5431	10.5202	9.35959	10.6957
A_09_P030391	euchromatic gene	9.0448	7.62635	9.78621	8.78353	8.99906	9.1012	9.23948	8.94327	9.02701	8.78729	9.10998	8.76414	8.98854	8.69881	8.55612	8.74064	8.9152	8.6834	9.29443	8.01237	9.21341
A_09_P030461	euchromatic gene	8.8977	7.46809	8.52082	7.84208	8.71219	8.87428	9.04583	8.73088	8.82101	8.80825	8.85505	8.67279	8.64516	8.57372	8.52195	8.66393	8.58896	8.61392	8.78898	7.71746	8.93222
A_09_P030506	euchromatic gene	9.19631	7.914	9.15703	8.21683	9.19453	9.06635	9.19542	9.0125	9.43926	9.06971	9.43953	8.8871	8.95827	8.80487	9.05089	8.94316	8.9521	9.06913	9.15627	8.09715	9.50807
A_09_P030526	euchromatic gene	10.8059	9.92205	11.113	10.7862	10.9604	10.8995	10.7836	11.0525	10.9771	10.9397	11.0275	10.4423	10.48	10.6403	10.7478	10.9603	10.4256	10.7973	10.6478	10.0763	10.9524
A_09_P030631	euchromatic gene	9.41617	8.17157	9.59708	8.76789	9.3956	9.42524	9.7405	9.29126	9.55692	9.44397	9.67503	9.311	9.48243	9.37663	9.42678	9.21409	9.14148	9.26001	9.63814	8.36059	9.48724
A_09_P030701	euchromatic gene	9.35505	7.74534	9.66268	8.56419	9.61718	9.77712	9.84637	9.38606	9.6286	9.42975	9.80639	9.20905	9.24305	9.20411	9.24792	9.2418	9.29636	9.30732	9.42557	8.14639	9.7981
A_09_P030711	euchromatic gene	9.94259	8.08776	9.39808	8.3765	9.45379	9.39374	9.76632	9.57767	9.53883	9.76452	9.59557	9.11035	9.18782	9.61825	9.49737	9.36286	9.10621	9.44187	9.42009	7.98334	9.74469
A_09_P030716	euchromatic gene	10.189	8.74116	10.4865	9.99841	10.1161	10.0209	10.1997	10.164	10.0441	10.2118	10.1211	9.8172	9.90986	9.93797	9.97307	10.0084	9.78115	10.0715	9.98194	9.18448	10.2894
A_09_P030746	euchromatic gene	9.34787	7.99821	9.91294	8.93272	9.53342	9.54267	9.69971	9.51831	9.56854	9.46826	9.67394	9.11145	9.24786	9.33703	9.24712	9.17933	9.19256	9.23016	9.49498	8.10327	9.43885
A_09_P030791	euchromatic gene	9.75387	8.31877	10.341	8.97476	9.95322	10.0672	10.2667	10.0425	9.97618	10.0259	10.0068	9.61466	9.73742	9.68679	9.77867	9.78459	9.67056	9.81842	10.0767	8.55127	10.3541
A_09_P030801	euchromatic gene	10.0271	8.33579	10.2453	9.19855	9.77913	9.69043	10.3896	9.99403	9.79141	10.1253	9.95888	9.88579	9.95539	9.95181	10.0179	9.90316	9.86889	9.95779	10.0857	8.82604	10.2638
A_09_P030806	euchromatic gene	7.338	6.78609	8.53654	7.5273	8.08601	8.20595	8.07081	8.16629	8.1489	8.08231	8.03429	7.78405	7.56925	7.40996	7.35189	8.00267	7.59456	7.57304	8.08173	6.90856	8.40995
A_09_P030811	euchromatic gene	9.25355	7.83048	9.59379	8.54506	9.31686	9.16117	9.40843	9.26567	9.40949	9.13517	9.571	9.12706	9.22231	8.98808	9.65631	8.91533	9.13562	9.02901	9.50524	8.0542	9.29704
A_09_P030816	euchromatic gene	9.08974	7.64839	8.53682	7.74339	9.23764	9.10823	9.09397	9.024	9.13996	9.07472	9.28264	8.43097	8.58009	8.81903	8.71201	8.66949	8.48985	8.85362	8.67727	7.6434	8.93842
A_09_P030826	euchromatic gene	9.99607	8.27813	10.0903	9.11328	10.2049	10.2331	9.79181	10.074	10.2276	10.1935	10.19	9.32305	9.26454	10.0122	9.87679	10.1036	9.19871	9.92942	9.59471	8.2417	9.6075
A_09_P030831	euchromatic gene	7.88065	7.05278	8.47171	8.23519	8.12557	8.09125	8.28831	8.00584	7.96688	8.03758	7.97366	7.68143	7.93895	8.01501	7.99901	8.05689	7.78699	8.09335	8.01326	7.33464	7.88178
A_09_P030866	euchromatic gene	9.05866	7.6221	9.5657	8.64956	8.96489	9.16975	9.57657	9.12123	9.16205	8.72217	9.27611	8.98216	8.83116	8.97779	9.03201	8.7216	9.05485	8.83878	9.24645	8.03826	9.39917
A_09_P030871	euchromatic gene	9.05862	7.68648	8.52527	7.92029	8.57022	8.85228	9.00601	8.95221	8.91185	8.99941	9.34485	8.82976	8.85064	9.01227	8.82692	8.61902	8.61718	8.9111	8.83212	7.92737	8.95034
A_09_P030906	euchromatic gene	8.38596	7.66095	9.23064	8.5047	8.46471	8.46419	8.40453	8.54495	8.73966	8.54386	8.19986	8.42781	8.29549	8.49472	8.50099	8.3808	8.3531	8.24997	8.79238	7.61125	8.13966
A_09_P030916	euchromatic gene	9.49266	7.88579	9.20715	8.23584	9.35837	9.37258	9.84387	9.39195	9.39907	9.61163	9.51864	9.12404	9.30051	9.22446	9.07825	9.22762	9.21844	9.29322	9.48332	8.29693	9.60613
A_09_P030946	euchromatic gene	10.1821	8.54257	10.4318	9.52661	10.0052	10.04	10.2898	9.9588	10.1811	10.129	10.2558	9.86822	9.94709	9.90012	9.85537	9.81746	9.79949	9.99977	10.1316	8.79886	10.4044
A_09_P031006	euchromatic gene	9.54085	7.91019	9.45848	8.80399	9.17822	9.22081	9.63273	9.16241	9.3579	9.15933	9.4197	9.15548	9.29804	9.29421	9.19305	9.15468	9.20798	9.09875	9.53943	8.34855	9.74468
A_09_P031041	euchromatic gene	9.3329	8.22969	10.4953	9.79001	9.79535	9.75562	9.78209	9.36029	9.89953	9.34103	9.85262	9.16406	9.39078	9.31615	9.45372	9.31897	9.28929	9.37627	9.46715	8.62579	9.72384
A_09_P031056	euchromatic gene	9.65025	7.91425	10.2044	9.10467	9.67869	9.74741	9.79806	9.33532	9.69968	9.53443	9.75713	9.60485	9.41418	9.51706	9.41594	9.35808	9.48137	9.33939	9.66908	8.20989	9.67343
A_09_P031096	euchromatic gene	9.419	8.04854	9.13979	8.57131	9.55757	9.84126	9.6696	9.21468	9.77556	9.45379	10.034	9.27263	9.31353	9.27764	9.38146	9.19496	9.31089	9.304	9.57444	8.24137	9.75283
A_09_P031106	euchromatic gene	10.0569	8.18398	10.0407	8.99748	9.8003	9.65409	10.2461	9.85129	9.75466	9.96942	9.87057	9.65844	9.71646	9.74174	9.58058	9.55237	9.60196	9.57087	9.86977	8.44076	10.1297
A_09_P031126	euchromatic gene	9.31311	7.74287	8.87787	8.11654	8.97618	8.97449	9.61142	9.11172	9.14927	9.07805	9.15949	9.01216	9.12049	8.99452	8.87739	8.8993	8.93204	8.98779	9.24367	7.91784	9.49697
A_09_P031131	euchromatic gene	9.26908	7.63277	9.5549	8.69339	9.22121	9.22616	9.56497	9.28562	9.32194	9.24083	9.3082	8.95807	9.09102	8.97652	9.01726	8.79978	9.02321	9.06027	9.36068	8.06406	9.56835
A_09_P031151	euchromatic gene	10.3898	9.824	9.49108	8.96026	10.3714	10.7519	10.8386	10.2649	10.7887	10.7892	10.97	10.3127	10.3649	10.6724	10.4558	10.2919	10.3685	10.3227	10.4807	10.3695	11.1399
A_09_P031161	euchromatic gene	9.57993	7.79497	9.33206	8.43661	9.5063	9.43667	9.55596	9.17943	9.51691	9.41113	9.64808	9.14171	9.22661	9.3173	9.21511	9.03153	9.06278	9.19121	9.19911	8.1903	9.56559
A_09_P031186	euchromatic gene	9.6875	8.16437	9.96233	9.05009	9.43266	9.34669	10.075	9.62526	9.52392	9.8263	9.64472	9.4583	9.59439	9.62485	9.52106	9.39608	9.48668	9.45769	9.83966	8.58236	9.99982
A_09_P031191	euchromatic gene	8.99415	7.8167	10.0596	8.92774	9.13751	9.1365	9.24477	9.0734	9.2813	9.08118	9.29217	8.92087	9.05795	8.77668	8.95358	8.90697	8.89791	8.96336	9.30557	8.14356	9.35442
A_09_P031206	euchromatic gene	8.71393	7.37616	9.41781	8.60896	8.8718	8.67849	8.97482	8.76502	8.77404	8.63992	8.63476	8.38837	8.58838	8.52335	8.59369	8.57498	8.55641	8.49833	8.78765	7.70993	9.04323
A_09_P031211	euchromatic gene	8.6395	7.40079	9.11613	8.47036	8.60061	8.59145	8.62206	8.34719	8.65105	8.51499	8.58097	8.23982	8.59164	8.44457	8.33822	8.30421	8.5258	8.39851	8.74813	7.68302	8.92569
A_09_P031236	euchromatic gene	10.7042	9.24019	10.7705	10.0168	10.5493	10.5425	10.7444	10.7117	10.6591	10.7783	10.7109	10.3743	10.3976	10.4791	10.6526	10.4787	10.151	10.5532	10.5915	9.61978	10.7625
A_09_P031261	euchromatic gene	11.3175	10.7497	10.7439	10.5226	11.1086	10.837	11.7899	11.441	11.2123	11.7453	11.2172	11.6046	11.6604	11.3176	11.2478	11.8313	11.9015	11.6511	11.8062	11.7846	12.1833
A_09_P031276	euchromatic gene	9.65223	7.94706	10.0291	8.76409	9.62814	9.62242	10.1175	9.59844	9.83796	9.60196	9.85858	9.40919	9.52106	9.47387	9.49789	9.2733	9.39234	9.40403	9.63288	8.33792	9.82099
A_09_P031286	euchromatic gene	10.0507	8.6806	10.0847	8.801	9.93736	10.152	9.78664	9.79407	10.0245	9.72733	10.232	9.33295	9.66735	9.76136	9.86835	9.59628	9.30575	9.67365	9.62068	8.60215	9.89906
A_09_P031306	euchromatic gene	9.03369	8.22921	9.63545	9.07116	9.72416	9.65607	9.50361	9.67066	9.6945	9.36993	9.99467	9.04897	9.03537	9.43764	9.48493	9.64806	8.95983	9.43271	9.19019	8.10047	9.39445
A_09_P031331	euchromatic gene	10.3546	9.0489	9.56779	8.80531	10.2622	10.3961	10.6512	10.0726	10.5135	10.1573	10.6574	10.072	10.2224	10.2142	9.99174	9.83858	10.1557	9.97401	10.4052	9.59192	10.8323
A_09_P031361	euchromatic gene	8.71406	7.41809	8.97909	8.24375	8.42404	8.39774	8.94971	8.67266	8.78986	8.67108	8.76527	7.94291	8.66883	8.68304	8.64003	8.5838	8.58231	8.53386	8.89702	7.7094	8.99589
A_09_P031376	euchromatic gene	8.70754	7.5596	9.58165	8.76442	8.94123	9.06996	9.45172	8.94716	8.86486	8.6848	9.05187	8.82464	8.84992	8.83403	8.68945	8.72497	8.86555	8.62111	9.09941	7.82925	9.38692
A_09_P031416	euchromatic gene	8.91408	7.55669	9.85253	9.02468	9.02121	9.10909	9.18639	8.95778	8.97529	9.05698	8.97092	8.71692	8.86188	8.89401	8.83604	8.74423	8.769	8.91859	9.00816	7.87861	8.97174
A_09_P031466	euchromatic gene	6.00487	5.78847	6.39487	6.49714	6.95067	7.21664	7.78232	5.60343	5.87043	5.56147	6.96762	5.82663	6.79312	7.1779	7.17606	7.10003	6.6343	6.50308	5.85249	6.37827	7.11024
A_09_P031486	euchromatic gene	10.8527	9.35475	10.6628	9.97235	10.6085	10.6165	10.9161	10.7492	10.7172	10.7109	10.7525	10.413	10.4153	10.373	10.3821	10.5082	10.4027	10.3983	10.6775	9.80285	10.8768
A_09_P031491	euchromatic gene	9.13874	8.34095	9.42082	8.96256	9.00078	8.67245	9.37692	9.02098	8.79947	9.09208	8.80723	8.87337	9.01999	9.00189	8.90731	8.66919	8.8627	8.8245	9.14502	8.0983	9.36978
A_09_P031521	euchromatic gene	9.01102	7.80473	9.54734	8.6884	9.2345	9.53567	9.60947	9.15865	9.32668	8.86791	9.57375	9.03114	9.04031	9.07269	8.89689	8.98093	9.04137	8.9478	9.35639	8.19009	9.51725
A_09_P031541	euchromatic gene	9.28861	7.7297	9.45587	8.56429	9.23659	9.21923	9.7477	9.60742	9.33351	9.45273	9.38514	9.12839	9.22736	9.23527	9.24305	8.97325	9.16247	9.16038	9.47027	8.15125	9.7578
A_09_P031556	euchromatic gene	10.7818	8.89891	11.1028	9.72214	10.7338	10.6892	10.2594	10.6915	10.8658	10.7327	10.9605	10.3057	10.2482	10.4499	10.3603	10.4782	9.96648	10.4805	10.5262	9.01761	10.6904
A_09_P031566	euchromatic gene	9.17351	7.88513	9.44563	8.37404	9.15479	8.94742	9.53789	9.06337	9.03745	9.18726	9.11229	8.97619	9.1606	8.88254	8.90184	8.94275	8.89369	9.04597	9.30096	8.1452	9.28557
A_09_P031616	euchromatic gene	9.66389	8.29664	9.73606	8.66624	9.74428	9.78047	9.79828	9.42246	9.61057	9.5347	9.83982	9.37085	9.51108	9.50236	9.7212	9.49677	9.27343	9.43429	9.59181	8.26844	9.88775
A_09_P031691	euchromatic gene	8.75735	7.52592	8.21934	7.77481	8.06676	7.98025	8.55926	8.17073	8.08092	8.21442	8.22186	8.2128	8.34829	8.24531	8.22976	8.03806	8.42758	8.24953	8.54517	8.40439	8.53147
A_09_P031696	euchromatic gene	9.45074	8.20945	10.1311	9.02355	9.61473	9.861	10.2249	9.59861	9.58835	9.41583	9.85557	9.5565	9.51495	9.50241	9.37659	9.35713	9.52878	9.24539	9.82944	8.51387	10.1042
A_09_P031701	euchromatic gene	9.92663	8.34094	10.6368	9.25516	10.094	10.2601	10.5671	10.2581	10.3208	10.0713	10.4145	9.87176	9.97711	9.85675	9.81865	9.8398	9.92144	9.80247	10.3324	8.6258	10.5192
A_09_P031706	euchromatic gene	9.44415	7.90842	9.52231	8.68953	9.3425	9.64504	9.53752	9.57725	9.41248	9.54539	9.42944	9.04584	9.14849	9.28366	9.7201	9.26924	9.1566	9.41225	9.45453	8.25518	9.6961
A_09_P031711	euchromatic gene	7.37378	6.79914	8.17758	8.08595	7.52066	7.68964	7.63362	7.43025	7.56808	7.39551	7.59729	7.18248	7.52265	7.72659	7.82583	7.54609	7.49589	7.69277	7.33117	6.92357	7.34162
A_09_P031731	euchromatic gene	9.09715	7.52142	9.60377	8.78299	8.819	8.84179	9.47312	9.0864	9.05264	9.06957	9.06641	8.83295	8.97244	8.8011	8.74407	8.65529	8.9393	8.91595	9.25643	7.96228	9.40796
A_09_P031736	euchromatic gene	9.46732	7.99512	9.24081	8.44577	9.49362	9.20297	9.44389	9.23318	9.35546	9.34834	9.43674	9.0851	9.2627	9.18411	9.23662	9.00276	9.0974	9.10381	9.36291	8.27529	9.56447
A_09_P031806	euchromatic gene	10.056	8.91876	10.1539	9.38576	10.3531	10.5967	10.3892	10.084	10.2129	10.0966	10.357	9.92318	10.0367	9.94699	9.87079	10.0327	10.0139	9.93754	10.2775	9.35589	10.6314
A_09_P031836	euchromatic gene	9.18833	8.06427	9.60357	8.85407	9.15369	9.13749	9.8335	9.54534	9.26683	9.28242	9.25331	8.99829	9.16433	9.21962	9.00987	9.01931	9.02491	9.15968	9.51631	8.16022	9.63458
A_09_P031936	euchromatic gene	8.94522	7.84829	8.57407	7.98971	9.10889	9.42581	9.30474	9.03863	9.30347	8.74965	9.57584	8.92048	8.74734	8.90586	8.67197	8.65794	8.91231	8.75427	8.95698	7.90194	9.00778
A_09_P031941	euchromatic gene	9.14066	7.7497	9.31924	8.22196	8.99866	9.05503	9.0866	8.97098	9.14091	8.71825	9.1433	8.90858	8.8637	8.92251	8.79992	8.74852	8.80709	8.68443	9.09126	7.89203	9.27089
A_09_P031951	euchromatic gene	9.37679	7.88658	8.6552	7.99552	9.02279	9.03484	9.33047	9.30384	9.24852	9.44868	9.30377	8.85587	9.00626	9.2979	9.32383	9.13337	8.9657	9.29605	9.22302	7.85438	9.50343
A_09_P031961	euchromatic gene	10.196	8.44519	10.7077	9.27196	10.2641	10.4575	9.95376	10.2299	10.2898	10.2593	10.3912	9.41773	9.48315	10.0642	10.1526	10.1563	9.43821	10.0466	9.7993	8.18211	9.87945
A_09_P031981	euchromatic gene	9.65688	8.04186	9.71234	8.7422	9.577	9.55359	10.2313	9.6889	9.64713	9.85032	9.72607	9.63149	9.65877	9.59163	9.64837	9.45083	9.53409	9.59751	9.99324	8.56463	10.2172
A_09_P032046	euchromatic gene	9.57911	7.85301	8.68384	7.93103	9.26021	9.12292	9.49223	9.36301	9.28951	9.40495	9.44118	8.93351	9.03932	9.20675	9.19671	9.04901	8.91367	9.16728	9.21573	7.80355	9.36094
A_09_P032096	euchromatic gene	9.77174	8.2226	10.5918	9.48445	9.87203	9.89491	10.1967	9.80612	9.64627	9.73801	9.61972	9.5388	9.56507	9.43234	9.53836	9.6877	9.66408	9.64033	9.99945	9.34463	10.3472
A_09_P032136	euchromatic gene	9.6574	8.15362	10.3017	9.18752	9.76302	9.98043	9.93638	9.70978	9.79336	9.71483	9.89481	9.45176	9.53721	9.47727	9.62153	9.67926	9.3448	9.66796	9.88964	8.58578	9.98381
A_09_P032151	euchromatic gene	9.07911	7.70926	8.88972	8.21862	8.97811	9.15294	9.53826	9.0523	9.02769	9.23078	9.07778	9.06634	9.18515	9.18343	9.24709	9.02665	9.04692	9.11795	9.39193	8.24714	9.38821
A_09_P032201	euchromatic gene	10.5684	9.60066	10.8637	10.5577	10.544	10.623	10.7396	10.4947	10.5922	10.4543	10.6072	10.2101	10.154	10.1922	10.1083	10.2863	10.2632	10.2767	10.3574	9.67297	10.5159
A_09_P032206	euchromatic gene	10.3391	8.39465	10.2679	9.13225	10.0434	9.90335	10.3686	10.2622	10.0374	10.0239	10.2303	10.1124	10.152	9.8888	9.8766	9.52957	10.0851	9.68406	10.3606	8.99118	10.7009
A_09_P032211	euchromatic gene	9.73946	8.21761	9.51435	8.94571	9.80501	9.83739	9.77687	9.71024	9.85644	9.53616	10.1038	9.24871	9.362	9.60886	9.48896	9.80659	9.30977	9.51258	9.47468	8.43211	9.64097
A_09_P032231	euchromatic gene	9.91271	8.17735	10.3201	9.33963	9.78569	9.80363	10.0975	9.73896	9.94372	9.84825	9.83417	9.65998	9.76729	9.75855	9.63967	9.57763	9.63222	9.58828	9.99709	8.46021	10.1292
A_09_P032241	euchromatic gene	11.721	11.0196	12.5684	12.9153	12.8865	13.1653	13.5338	13.0925	12.8467	13.1324	12.9766	12.247	12.4191	12.5649	12.5607	13.6397	12.5976	13.3113	12.413	12.5151	13.1767
A_09_P032246	euchromatic gene	10.134	8.85451	10.4141	9.23162	9.77356	9.9184	10.7354	9.90872	9.97835	9.87952	10.2247	10.1293	9.94652	9.69513	9.72624	9.60035	10.0342	9.68515	10.2802	9.65077	10.4023
A_09_P032261	euchromatic gene	9.60777	7.92446	9.13841	8.35451	9.11435	9.07159	9.74888	9.27106	9.09612	9.45465	9.27241	9.16572	9.33249	9.21983	9.24063	8.95877	9.23801	9.09315	9.51458	8.30631	9.61884
A_09_P032266	euchromatic gene	15.2854	15.0221	14.3402	14.5694	15.2078	15.1297	14.9826	14.8913	15.1847	15.2039	15.3098	14.8959	14.8558	15.1422	15.3595	15.2202	14.7415	15.187	14.6849	14.799	15.0563
A_09_P032276	euchromatic gene	8.23724	7.13329	8.12065	7.72846	8.27136	8.15968	8.81661	8.16471	8.31837	8.27815	8.26523	8.09803	8.41774	8.28694	8.0732	8.14533	8.27736	8.20452	8.34725	7.4368	8.47248
A_09_P032346	euchromatic gene	9.27136	7.82407	9.32833	8.42491	9.22308	9.02502	9.67302	9.16971	9.18498	9.27986	9.21778	8.95621	9.12819	9.07264	9.13497	8.98684	8.99868	9.03891	9.2813	8.1419	9.27155
A_09_P032351	euchromatic gene	9.64616	7.99704	9.92985	8.84026	9.85611	9.72856	10.3887	9.70197	9.85733	9.567	9.9602	9.22959	9.34706	9.61125	9.71794	9.25521	9.31091	9.5216	9.64662	8.81456	9.72088
A_09_P032356	euchromatic gene	8.68043	7.36281	9.08704	8.2702	8.85499	8.76624	8.9622	8.67954	8.80851	8.62569	8.83944	8.39528	8.57535	8.52439	8.56656	8.65547	8.52804	8.63093	8.87766	7.59447	8.77633
A_09_P032361	euchromatic gene	9.96925	8.09848	10.3633	9.29578	10.1138	10.1359	10.2002	9.83684	10.143	10.0173	10.0514	9.45172	9.54352	9.80304	9.62878	9.76568	9.49526	9.63834	9.9389	8.49283	10.0786
A_09_P032391	euchromatic gene	9.2378	8.12976	9.31388	8.76028	9.26214	9.27089	9.52372	9.18767	9.39575	9.30632	9.53833	8.9775	9.1656	9.18683	9.12931	9.02394	9.09281	9.2256	9.1869	8.30365	9.36798
A_09_P032396	euchromatic gene	10.0772	8.5726	10.5415	9.37428	9.88968	9.80883	10.544	9.98714	9.9973	10.1429	9.87894	9.92265	9.79883	9.72635	9.65537	9.59679	9.68607	9.71442	10.1975	8.73559	10.3342
A_09_P032416	euchromatic gene	9.68047	8.55863	10.0138	9.27898	9.61738	9.73342	10.0406	9.75576	9.74616	9.66078	10.0089	9.53081	9.62944	9.50162	9.31874	9.37669	9.59042	9.51347	10.0735	8.69084	10.0864
A_09_P032421	euchromatic gene	8.17169	7.25301	8.60206	8.14027	8.28635	8.27344	8.35556	8.11569	8.26872	8.18048	8.18557	8.2015	8.33732	8.17872	8.12625	8.07491	8.34486	8.19781	8.47038	7.60145	8.41089
A_09_P032426	euchromatic gene	9.45116	7.88774	9.79538	8.92436	9.31991	9.23133	9.68901	9.60769	9.45272	9.43417	9.43645	9.14031	9.28891	9.40358	9.5046	9.10412	9.15213	9.1999	9.40496	8.11324	9.49245
A_09_P032471	euchromatic gene	9.38235	7.98923	9.53438	8.7878	9.51272	9.52275	9.89798	9.70007	9.62586	9.37775	9.67239	9.16069	9.24931	9.40424	9.38136	9.28204	9.21081	9.28224	9.49668	8.27429	9.67417
A_09_P032486	euchromatic gene	8.71835	7.62484	9.17656	8.35463	8.97807	9.04992	8.93824	8.50809	8.91537	8.73187	9.14629	8.63405	8.76234	8.55551	8.54518	8.39907	8.7834	8.71614	9.00174	7.8713	9.17367
A_09_P032496	euchromatic gene	9.5389	8.18062	8.90627	8.21501	9.66396	9.4813	9.53065	9.24037	9.73954	9.42028	9.72948	9.01067	9.16987	9.55746	9.23321	9.05484	9.13795	9.22607	9.2429	8.48723	9.65056
A_09_P032521	euchromatic gene	9.14665	7.81898	9.07898	8.39672	9.19936	8.90147	9.19074	9.0795	9.08723	8.94333	9.23329	8.7724	9.03572	8.89546	8.89467	8.7722	8.93928	8.90518	9.0819	8.09512	9.41939
A_09_P032616	euchromatic gene	9.3796	8.16912	10.0459	8.95289	9.44297	9.53214	9.96242	9.4909	9.53334	9.45342	9.63178	9.12376	9.51972	9.20477	9.40565	9.30684	9.34604	9.30404	9.71169	8.26296	9.70229
A_09_P032641	euchromatic gene	8.82563	7.53014	9.16425	8.35487	9.06681	9.0268	9.29482	8.93324	8.89977	8.55939	9.03135	8.88218	8.81993	8.93322	8.7184	8.78951	8.88541	8.69416	9.10973	7.81759	9.34506
A_09_P032651	euchromatic gene	8.38315	7.59503	8.61516	8.11737	8.60042	8.55612	8.42634	8.48326	8.49108	8.53876	8.64605	8.13668	7.9986	8.54276	8.36373	8.47177	8.02671	8.50536	8.51961	7.35813	8.40405
A_09_P032716	euchromatic gene	9.88358	8.08869	9.06846	8.41318	9.21698	9.18866	9.87646	9.48394	9.24424	9.43151	9.36811	9.44249	9.56051	9.45978	9.45031	9.29921	9.42875	9.14553	9.84287	8.31272	9.98461
A_09_P032751	euchromatic gene	9.56618	8.31841	9.3621	8.6476	9.28669	9.2837	9.6717	9.49947	9.35551	9.54206	9.4447	9.10579	9.22204	9.37615	9.25086	9.03775	9.13832	9.19588	9.36544	8.54384	9.50092
A_09_P032756	euchromatic gene	9.31277	7.96132	10.1871	9.10101	9.50102	9.48813	9.5705	9.27281	9.51336	9.30958	9.83729	9.28027	9.40841	9.25675	9.36248	9.10654	9.15803	9.2248	9.74845	8.36297	9.65802
A_09_P032786	euchromatic gene	9.16524	7.79115	9.31936	8.45291	9.349	9.08722	9.61101	9.24742	9.18069	9.29998	9.32332	8.73638	9.03367	9.27646	9.11384	9.02352	8.91133	9.02361	9.1517	8.03836	9.32248
A_09_P032796	euchromatic gene	9.27705	8.10399	9.41155	9.04217	9.35492	9.55668	9.66879	9.37626	9.42062	9.25489	9.57336	9.22437	9.29383	9.26999	9.09651	9.28215	9.24954	9.12341	9.5317	8.47362	9.66324
A_09_P032816	euchromatic gene	10.4013	8.70536	10.3449	8.95148	10.594	11.014	10.6189	10.3308	10.9251	10.4429	11.2763	10.0542	9.93098	10.4111	10.3721	10.1555	9.81626	10.2319	10.1465	8.84032	10.5422
A_09_P032821	euchromatic gene	9.69831	8.51353	9.96476	8.8226	9.86455	9.94185	9.7741	9.70283	9.82128	9.5607	10.0077	9.31228	9.28677	9.42104	9.31793	9.308	9.29055	9.44572	9.81951	8.57832	9.76771
A_09_P032826	euchromatic gene	9.37991	8.31712	10.2034	9.67477	9.77432	9.79744	10.4052	10.1688	9.7779	9.79109	9.67036	9.4307	9.51712	9.56717	9.44895	9.63315	9.61239	9.7058	9.83072	8.93845	10.0712
A_09_P032831	euchromatic gene	9.85842	8.63763	10.3186	9.61705	9.86559	9.93508	9.66421	10.061	9.92534	9.91927	9.90419	9.22345	9.34118	9.70345	9.81032	9.83598	9.16586	9.75424	9.42149	8.77377	9.62626
A_09_P032846	euchromatic gene	10.6602	9.12661	11.0054	10.1099	10.87	11.2186	10.8186	10.6817	11.1763	10.4911	11.4743	10.4903	10.5012	10.6988	10.7897	10.7212	10.3372	10.4478	10.7547	9.57099	10.9627
A_09_P032866	euchromatic gene	10.5983	9.95458	10.3055	10.2609	10.8021	10.7007	10.3925	10.2421	10.3808	10.2365	10.4458	9.57964	9.63126	9.82289	9.762	10.5068	10.0575	10.249	10.1555	10.0436	11.0257
A_09_P032876	euchromatic gene	8.66251	7.4059	8.90347	8.09346	8.35164	8.78811	9.16265	8.34623	8.58886	8.44863	8.43054	8.4793	8.70649	8.46494	8.37371	8.24886	8.495	8.39149	8.58159	7.67168	9.1512
A_09_P032901	euchromatic gene	8.85103	7.50568	9.23641	8.35208	8.87708	8.75226	9.29241	9.03915	8.88293	9.06102	8.97473	8.77692	8.96484	8.96158	8.86207	8.77145	8.84866	8.845	9.09999	7.86676	9.36949
A_09_P032911	euchromatic gene	9.56618	7.94818	9.40789	8.53128	9.45198	9.36274	9.84507	9.37484	9.40418	9.50235	9.59199	9.14298	9.20253	9.27532	9.23828	9.16128	9.16187	9.18755	9.37661	8.45545	9.62711
A_09_P032916	euchromatic gene	9.2676	7.83884	9.82329	9.14487	9.47914	9.46383	9.64014	9.4586	9.54334	9.29492	9.6028	9.01786	9.20024	9.22918	9.15704	9.14166	9.09941	9.24576	9.36577	8.20296	9.67582
A_09_P032921	euchromatic gene	9.68884	8.7707	10.5183	10.1921	10.2444	10.4309	10.1237	10.1256	10.3584	9.78581	10.6285	9.75966	9.62184	9.79016	9.60265	9.92711	9.71061	9.71852	9.9327	9.00102	9.92872
A_09_P032936	euchromatic gene	9.20104	7.88195	9.38464	8.36358	9.30044	9.33611	9.8524	9.14785	9.40911	9.1247	9.58414	8.91141	9.11717	9.06183	9.10324	8.85522	8.94294	8.96025	9.12997	8.02687	9.40246
A_09_P032941	euchromatic gene	9.55799	8.09619	10.1475	9.72822	9.64085	9.84237	10.1344	9.71435	9.97823	9.75903	10.1229	9.47458	9.48563	9.62863	9.6305	9.58819	9.42618	9.5244	9.62044	8.44222	10.0679
A_09_P033036	euchromatic gene	9.41914	7.99898	9.79795	8.83455	9.38396	9.35519	9.49582	9.29544	9.56638	9.26377	9.58507	9.069	9.08702	9.13017	9.11659	9.02521	9.04187	9.09209	9.40318	8.10543	9.56515
A_09_P033096	euchromatic gene	11.1237	10.4992	10.9832	10.2366	11.8189	12.727	11.6176	10.8029	12.7988	11.2573	12.987	11.2725	11.3886	11.1756	11.3384	11.0974	11.2536	11.0295	11.2324	11.9246	12.6356
A_09_P033201	euchromatic gene	9.85192	8.34699	10.2646	8.9871	9.55029	9.55433	9.99616	9.71246	9.74297	9.82757	9.8958	9.76492	9.72013	9.42061	9.36108	9.34143	9.68841	9.46901	10.1164	8.7521	10.0623
A_09_P033206	euchromatic gene	10.5805	8.70159	10.2327	8.9868	10.1907	10.125	10.7255	10.3802	10.3296	10.4317	10.5088	10.1361	10.2085	10.4206	10.4648	10.1646	10.0603	10.2462	10.5119	8.86323	10.4888
A_09_P033226	euchromatic gene	9.50567	7.90578	9.59413	8.77599	9.45306	9.53235	9.80352	9.54925	9.46664	9.46031	9.51	9.19894	9.27168	9.23046	9.20399	9.04192	9.22003	9.23559	9.49266	8.33143	9.45747
A_09_P041066	euchromatic gene	9.61076	7.87003	9.63215	8.84361	9.09013	9.03163	9.76891	9.56434	9.13733	9.37758	9.14249	9.26224	9.36634	9.19492	9.16773	9.23711	9.29357	9.27505	9.57924	8.42631	9.65907
A_09_P041086	euchromatic gene	9.07315	7.73493	9.25574	8.40419	9.0076	9.13322	9.43212	8.99582	9.23602	8.95372	9.37655	8.9133	9.01413	8.9797	8.87604	8.86666	8.89906	8.83874	9.31229	8.12096	9.25186
A_09_P041166	euchromatic gene	9.23345	7.90112	9.60204	8.61503	9.38587	9.44157	9.59323	9.34062	9.41565	9.1457	9.627	10.0467	9.08411	9.22569	9.02231	9.07979	9.09295	9.14199	9.56337	7.9684	9.68658
A_09_P041171	euchromatic gene	8.81563	7.45607	8.88789	8.2531	8.7643	8.76623	9.38595	8.86295	9.0865	8.9215	9.22136	8.50819	8.81337	8.8403	8.89517	8.61284	8.73669	8.79856	9.02625	7.69348	9.14266
A_09_P041176	euchromatic gene	9.47487	7.91049	9.65079	8.21142	9.76587	9.60594	9.79351	9.63937	9.73282	9.57385	9.5691	9.19942	9.33875	9.42741	9.53594	9.22841	9.16327	9.15247	9.51376	8.41834	9.8379
A_09_P041186	euchromatic gene	9.2521	7.68673	9.99211	8.82654	9.31635	9.43117	9.69549	9.23655	9.47388	9.22437	9.54694	9.05473	9.21053	9.21295	9.15434	9.01461	9.09086	9.12078	9.403	8.06277	9.37527
A_09_P041193	euchromatic gene	9.9086	8.68288	9.47193	8.97629	9.65342	9.52362	9.60484	9.62537	9.51243	9.65414	9.56953	9.20711	9.28878	9.51674	9.49442	9.15685	9.15479	9.34627	9.4384	8.3435	9.65332
A_09_P041201	euchromatic gene	10.1068	8.19958	10.1043	8.9294	9.87639	9.964	10.4134	10.1457	10.0823	10.1393	10.3053	9.82923	9.86247	10.0538	10.0697	10.0023	9.72851	10.032	10.1317	8.46436	10.3364
A_09_P041226	euchromatic gene	9.81053	8.13563	9.87718	8.62442	9.64009	9.73301	9.73133	9.66784	9.74913	9.50402	9.81257	9.2025	9.31538	9.43185	9.42519	9.47318	9.26325	9.27659	9.58536	7.9834	9.67086
A_09_P041291	euchromatic gene	9.53324	8.02718	9.39117	8.62316	9.0148	9.20488	9.6681	9.16591	9.29263	9.29289	9.31567	9.36904	9.35269	9.08392	8.99999	9.06535	9.45662	9.10934	9.67865	8.74515	9.69914
A_09_P041316	euchromatic gene	10.5342	9.18264	10.5798	10.087	10.6867	10.5671	9.76839	10.3397	10.6102	10.3704	10.6308	9.37255	9.30982	10.0527	9.97509	9.90069	9.23424	9.97871	9.57471	8.71847	9.89215
A_09_P041341	euchromatic gene	8.92742	7.77609	9.53374	8.74886	9.11921	9.17823	9.35386	8.97405	9.16486	8.87437	9.10415	8.83168	8.78924	8.75372	8.72222	8.64134	8.87275	8.82003	8.98086	8.08519	8.97378
A_09_P041376	euchromatic gene	8.40223	7.22947	8.23777	7.78066	7.93197	8.09863	8.48455	8.00322	8.03317	7.90808	7.97349	8.17562	8.26732	8.14915	8.00865	7.84077	8.22523	7.98966	8.30905	7.36249	8.60666
A_09_P041396	euchromatic gene	8.88663	8.1608	8.95388	8.27946	8.99573	8.86093	9.16977	8.90098	8.88674	8.91846	8.93379	8.57463	8.68192	8.77617	8.74415	8.64241	8.64633	8.72469	8.88091	7.80555	8.91118
A_09_P041441	euchromatic gene	9.5782	7.91015	10.2136	9.25493	9.6224	9.80176	9.90471	9.55769	9.69622	9.52501	9.83652	9.12594	9.18322	9.28171	9.3074	9.30001	9.18471	9.38929	9.46117	8.22819	9.7189
A_09_P041451	euchromatic gene	9.64094	8.31105	10.0071	8.95896	9.59307	9.83743	9.54689	9.64373	9.65445	9.32719	9.75009	9.35703	9.41689	9.30585	9.14086	9.29174	9.43056	9.17621	9.80242	8.30905	9.57147
A_09_P041456	euchromatic gene	9.79384	8.07068	10.0011	8.79914	9.71257	9.65914	10.0884	9.72063	9.79289	9.66442	9.77943	9.47041	9.51856	9.51676	9.45104	9.24219	9.42494	9.37947	9.71525	8.32597	9.75936
A_09_P041506	euchromatic gene	8.90575	7.72087	9.02875	8.67853	8.92029	9.08794	9.25614	9.02509	9.1273	8.87485	9.26696	8.75801	8.90069	8.91504	8.74778	8.80132	8.9452	8.83229	9.15296	7.95532	9.35804
A_09_P041511	euchromatic gene	8.65568	7.43436	9.29562	8.85932	8.82803	8.44794	9.05426	8.55908	8.51695	8.66405	8.42245	8.39103	8.5332	8.67108	8.48384	8.44989	8.59833	8.54319	8.8098	7.8721	8.94724
A_09_P041516	euchromatic gene	9.05258	7.74796	9.76576	8.7219	9.17587	9.25552	9.39948	9.06803	9.28825	8.93086	9.39661	8.88594	9.01189	8.97478	9.04866	9.01911	9.00687	8.93227	9.31892	7.90521	9.46645
A_09_P041526	euchromatic gene	8.54907	7.58828	8.98683	8.63307	8.50698	8.41355	8.78884	8.75104	8.57563	8.71176	8.53517	8.51778	8.66092	8.70284	8.70706	8.48504	8.60618	8.53592	8.71471	8.06716	8.64254
A_09_P041561	euchromatic gene	10.0045	8.53627	10.2824	9.52584	10.1113	10.2534	10.2412	9.98191	10.3182	9.88639	10.3794	9.84601	9.87487	9.81644	9.88938	9.71302	9.94231	9.68481	10.1904	9.21968	10.2519
A_09_P041571	euchromatic gene	10.1637	8.72958	10.0441	9.34105	9.84934	9.83135	10.3521	10.1298	10.0037	10.1238	10.0902	10.0106	10.0656	10.0202	10.1072	9.75793	9.95725	9.88982	10.3088	9.28873	10.4621
A_09_P041601	euchromatic gene	10.7084	10.4278	11.4465	11.031	10.7958	10.5761	12.193	12.8728	10.5391	12.0354	10.4256	10.5223	10.266	10.4695	10.5092	11.6452	10.7494	11.5312	10.7895	10.6702	11.0578
A_09_P041646	euchromatic gene	9.56009	7.99227	10.0931	9.30428	9.55951	9.64013	9.65075	9.36114	9.4607	9.53103	9.64556	9.09244	9.30449	9.23359	9.26307	9.39181	9.31781	9.24365	9.54147	8.27831	9.65685
A_09_P041651	euchromatic gene	11.9291	11.6316	12.2797	12.2935	12.4249	12.5465	12.1586	12.1913	12.3384	12.3366	12.4545	11.7961	11.7757	11.9321	11.9967	12.6449	12.2056	12.1173	12.1178	12.1816	12.5971
A_09_P041666	euchromatic gene	10.0067	8.76681	10.999	10.3049	10.3393	10.6474	10.4853	10.2298	10.4829	10.342	10.6394	10.1658	10.0463	10.1604	10.3325	10.216	9.97259	10.1517	10.3548	9.15869	10.6568
A_09_P041681	euchromatic gene	9.16173	7.66665	9.92089	8.76501	9.20503	9.23916	9.64704	9.26296	9.26888	9.14113	9.27505	9.09839	9.21321	9.11735	9.05675	9.07694	9.13415	9.03415	9.50127	8.07635	9.42223
A_09_P041686	euchromatic gene	9.35249	7.92353	10.4075	9.17428	9.50009	9.43553	9.66459	9.44398	9.49956	9.25941	9.63848	9.31342	9.21712	9.29142	9.0384	9.21501	9.06644	9.22302	9.92512	8.10143	9.50254
A_09_P041691	euchromatic gene	10.5519	9.73952	10.9777	9.61346	11.439	11.8491	10.4617	10.335	11.5683	10.4052	11.9122	10.2205	10.3087	10.1749	10.2795	9.9662	10.2032	10.2378	10.5179	9.40593	11.3371
A_09_P041706	euchromatic gene	8.73805	7.50249	9.53223	8.72753	8.65834	8.76279	8.90276	8.70752	8.65893	8.72008	8.63991	8.76357	8.76176	8.64006	9.13223	8.49003	8.80635	8.62224	9.16798	7.94002	9.05106
A_09_P041711	euchromatic gene	12.78	12.3349	11.4832	11.4249	12.3874	12.2058	13.545	12.8383	12.365	13.3636	12.5418	13.1575	13.2198	13.0897	12.9338	13.2293	13.0568	13.194	13.1344	13.1914	13.7013
A_09_P041721	euchromatic gene	9.03055	7.99952	9.47105	8.75594	8.90602	8.83695	9.25466	9.07604	8.96557	8.86885	8.88176	8.73791	8.96792	8.83612	8.955	8.95242	8.92278	8.79629	9.2317	8.19484	9.49003
A_09_P041746	euchromatic gene	8.95189	7.64953	9.28627	8.47054	8.98793	9.26456	9.37178	8.75724	9.07012	8.94133	9.2592	8.81955	8.85496	8.79625	8.77279	8.75657	8.93751	8.90059	9.06077	7.91128	9.06512
A_09_P041761	euchromatic gene	9.97673	8.35338	9.75358	8.82913	9.69207	9.67712	10.3282	9.87841	9.86508	9.97215	9.90952	9.59592	9.81076	9.71511	9.61342	9.47085	9.54281	9.63984	9.85504	8.56237	10.2511
A_09_P041821	euchromatic gene	9.41752	8.88545	11.0111	10.6317	10.9496	10.9716	10.2512	10.7759	10.7837	10.4797	10.8907	9.80555	9.3638	9.91491	9.57016	10.5998	9.86302	10.3583	9.8183	9.5734	10.2063
A_09_P041831	euchromatic gene	10.2604	8.38455	10.2538	9.18597	10.0094	9.79681	10.2741	10.0764	9.91874	10.1372	10.0497	9.77429	9.93525	9.86649	9.92481	9.72726	9.79526	9.81614	10.1033	8.80747	10.1851
A_09_P041856	euchromatic gene	9.31335	7.81939	9.33735	9.06151	9.31953	9.27277	9.63171	9.21088	9.35383	9.32722	9.48855	8.96461	9.32364	9.07573	9.11632	9.15174	8.97685	9.18057	9.21463	8.32548	9.33297
A_09_P041881	euchromatic gene	9.91702	8.18046	10.3519	8.88216	9.76439	9.71067	9.88711	10.0498	9.71626	9.79452	9.69561	9.31163	9.42971	9.67086	9.81445	9.6306	9.29972	9.66807	9.6079	8.23567	9.70888
A_09_P041886	euchromatic gene	9.28839	7.72216	9.57253	8.61323	9.30341	9.20859	9.66888	9.4698	9.33223	9.28393	9.29732	9.03907	9.25721	9.29978	9.44671	9.20047	9.18391	9.20894	9.49813	8.17414	9.55243
A_09_P041891	euchromatic gene	11.7547	11.6373	13.6559	13.7478	13.9581	14.1783	13.1545	13.6739	13.803	13.5115	14.1665	12.6553	12.2668	13.2419	13.1985	13.9685	12.7067	13.6373	12.6281	12.3674	13.0646
A_09_P041896	euchromatic gene	10.0408	8.33322	10.1869	9.17183	9.8684	9.82311	10.3953	10.0235	9.9825	10.1315	10.0344	9.86086	9.95749	9.89134	9.8786	9.71308	9.83158	9.81742	10.2225	8.8492	10.5558
A_09_P041911	euchromatic gene	9.26958	7.83709	10.2201	9.09156	9.25454	9.28046	9.45173	9.1814	9.41864	9.18164	9.63164	9.15931	9.23508	9.05149	9.19958	9.06531	9.06135	9.24098	9.47817	8.08533	9.65196
A_09_P041926	euchromatic gene	9.18437	7.75671	8.93339	8.16992	9.00494	8.81136	9.63198	9.27661	9.01584	9.29821	9.09582	9.10847	9.24031	9.17174	9.17756	8.9081	9.07606	9.13131	9.40094	8.44776	9.49847
A_09_P041946	euchromatic gene	8.64479	7.5084	8.62086	8.08004	8.67662	8.6613	8.80552	8.74954	8.74911	8.80944	8.67937	8.22963	8.45655	8.52966	8.52375	8.57829	8.35591	8.69376	8.60996	7.49766	8.73557
A_09_P041991	euchromatic gene	9.41791	8.07822	9.78762	8.88587	9.38045	9.56975	9.70639	9.58861	9.5515	9.52148	9.66015	9.17842	9.44854	9.13849	9.28548	9.36914	9.13663	9.35406	9.61309	8.08774	9.49566
A_09_P041996	euchromatic gene	8.49796	7.2826	9.00683	8.47977	8.50773	8.44891	8.98886	8.67285	8.51463	8.63007	8.50151	8.33152	8.57727	8.41837	8.45221	8.2456	8.43058	8.48947	8.60979	7.72488	8.61134
A_09_P042011	euchromatic gene	8.55352	7.51416	8.99039	8.36559	8.43719	8.55348	8.84415	8.57235	8.59467	8.33885	8.72744	8.37885	8.49038	8.33016	8.21576	8.48711	8.45005	8.37004	8.55143	7.57751	8.553
A_09_P042041	euchromatic gene	9.40313	8.23992	9.80518	8.75205	9.69307	9.93227	9.51887	9.64489	9.74335	9.22062	9.95129	9.12898	8.83597	9.32039	9.25601	9.24291	8.93434	9.16499	9.22668	7.83958	9.45277
A_09_P042056	euchromatic gene	9.18377	7.62057	9.6526	8.77812	9.27039	9.09355	9.43878	9.34378	9.0775	9.24667	9.29053	9.04038	9.06767	9.04256	9.13667	9.30584	8.9406	9.06372	9.23212	8.02514	9.43195
A_09_P042066	euchromatic gene	7.91471	7.00787	8.77537	8.22056	8.27654	8.29898	8.39929	8.12275	8.25026	8.12131	8.30795	7.81163	8.07246	8.0757	7.95906	8.03863	8.12571	8.13316	8.5107	7.1885	8.29779
A_09_P042106	euchromatic gene	8.80188	7.72093	9.02952	8.28436	8.73038	8.81618	9.25296	8.71605	8.89255	8.69873	9.06778	8.94403	8.8633	8.70515	8.7778	8.67286	8.9433	8.69053	9.1039	8.38779	9.23245
A_09_P042151	euchromatic gene	8.98865	7.95135	9.76167	8.90859	9.17871	9.29302	9.1903	9.04016	9.3726	9.12204	9.56258	8.78069	8.98597	9.03018	9.22948	8.96363	8.88634	9.0461	9.07019	8.17402	9.41977
A_09_P042176	euchromatic gene	9.08625	8.51001	9.23703	8.65428	9.63652	9.6571	9.79191	9.53712	9.6585	9.47993	9.88812	9.08667	9.24767	9.32714	9.80402	9.28266	8.9545	9.2737	9.32373	9.42207	9.66236
A_09_P042251	euchromatic gene	9.29846	7.80274	9.62869	8.98428	9.58166	9.52531	9.57728	9.38897	9.65718	9.47984	9.56436	9.02762	9.14269	9.20923	9.17389	9.30074	9.05306	9.22124	9.3299	8.09572	9.53556
A_09_P042261	euchromatic gene	8.42635	7.45903	8.54183	7.94167	8.43182	8.4868	8.66154	8.65984	8.4421	8.35361	8.41313	8.40579	8.44358	8.30152	8.19114	8.50623	8.43404	8.28286	8.66783	7.79802	8.64133
A_09_P042351	euchromatic gene	9.34483	8.675	9.92455	9.55398	9.42864	9.4509	9.52937	9.57163	9.28575	9.40698	9.23572	9.12287	9.2849	9.42063	9.52851	9.54695	9.15012	9.50108	9.20064	9.03027	9.42143
A_09_P042361	euchromatic gene	10.2242	8.41142	10.3395	9.19432	10.1367	10.1047	10.3442	10.1537	10.2382	10.2904	10.2721	9.71126	9.73144	10.0656	10.1177	10.0773	9.58273	10.0527	9.99996	8.55543	10.2865
A_09_P042411	euchromatic gene	11.478	10.4883	11.1139	10.88	11.2722	11.2895	11.4251	11.285	11.3685	11.471	11.4877	11.1336	11.1508	11.361	11.4024	11.5873	11.0752	11.3342	11.2061	10.6456	11.6316
A_09_P042446	euchromatic gene	10.8755	9.42148	10.5582	9.43022	10.9949	11.2849	10.0606	10.9425	11.1502	10.6258	11.3918	9.9393	9.72346	10.8111	10.5089	10.6683	9.69258	10.5296	10.0535	8.87862	10.2933
A_09_P042451	euchromatic gene	9.7972	8.0606	10.1017	8.95896	9.93828	9.97667	10.3504	10.0739	10.0776	9.87166	10.2152	9.70405	9.86977	9.74456	9.59247	9.62469	9.71957	9.66223	10.0113	8.52632	10.0836
A_09_P042461	euchromatic gene	9.09386	7.86932	10.1315	9.14299	9.11362	9.22583	9.47955	9.10443	9.2426	9.15533	9.24997	8.85879	9.11743	8.89998	8.99867	8.94283	8.93181	9.02483	9.4513	8.02026	9.44702
A_09_P042486	euchromatic gene	9.20915	7.65696	9.73349	9.43445	9.10975	9.32425	9.39428	8.87113	9.29057	9.02873	9.43467	8.86604	9.22309	8.86032	8.97134	8.63775	8.99091	8.90762	9.1484	8.06399	9.60769
A_09_P042501	euchromatic gene	10.7726	10.7405	11.4161	12.2227	12.0165	12.1367	10.8976	11.3961	12.1285	11.4229	12.119	10.9664	10.766	10.953	11.275	11.6025	10.6695	11.4709	10.7546	10.7011	10.9014
A_09_P042511	euchromatic gene	8.89544	7.77153	9.68878	8.77162	9.09843	8.98353	9.3624	8.96374	8.97255	9.07521	9.15611	8.86214	8.97093	8.80266	8.77763	8.82126	8.88687	8.94599	9.45524	8.14951	9.46118
A_09_P042561	euchromatic gene	10.0218	8.21085	9.99204	8.89627	9.83392	9.87144	10.3266	10.1003	10.0219	10.194	10.0203	9.82546	9.89562	9.88082	9.94667	9.73814	9.71922	9.95535	10.1244	8.51616	10.3787
A_09_P042591	euchromatic gene	9.83708	8.02401	9.41244	8.5603	9.49037	9.34112	9.94391	9.72637	9.50294	9.66107	9.60012	9.50118	9.62131	9.61592	9.57829	9.40453	9.56687	9.4331	9.92139	8.3794	10.1069
A_09_P042596	euchromatic gene	9.58052	8.07514	10.1872	8.86034	9.41374	9.56576	9.62055	9.2241	9.71709	9.65304	9.7286	9.03688	9.31985	9.36439	9.54809	9.49418	9.29326	9.59512	9.75521	8.17822	9.64181
A_09_P042611	euchromatic gene	8.90917	7.57411	8.89483	8.41713	8.6687	8.58872	9.4553	8.89176	8.69309	8.95092	8.72919	8.79513	8.9364	8.6279	8.70769	8.76282	8.71091	8.8793	8.94326	8.09024	9.19977
A_09_P042626	euchromatic gene	10.076	8.21415	9.95326	8.89016	10.0059	9.98667	10.3813	9.99468	9.87348	10.1545	9.94415	9.83902	9.90532	9.90469	10.0835	9.72635	9.7776	9.94003	10.1778	8.70352	10.4151
A_09_P042671	euchromatic gene	8.93548	7.3524	8.44532	7.9286	8.17129	8.35233	8.52526	8.38285	8.53543	8.264	8.61896	8.21203	8.50284	8.39893	8.65891	8.22555	8.45606	8.26645	8.71126	7.51957	8.61643
A_09_P042676	euchromatic gene	9.25749	7.7261	9.7849	8.87551	9.50339	9.7961	9.7272	9.44728	9.47337	9.3699	9.71521	9.05	9.28204	9.2449	9.15089	9.19229	9.31969	9.27828	9.45796	8.11577	9.64496
A_09_P042716	euchromatic gene	9.98734	8.07363	9.92735	8.77388	9.89415	9.89457	9.67201	9.96922	10.0172	9.95918	10.076	9.17045	9.24916	9.6097	9.65612	9.53935	9.07667	9.71615	9.50905	8.07967	9.55595
A_09_P042946	euchromatic gene	9.24489	7.82593	9.80695	8.71048	9.31426	9.15121	9.48703	9.231	9.37357	9.19769	9.42117	9.07164	9.09253	8.91701	8.96493	8.87045	9.00277	9.0362	9.37671	8.04714	9.40365
A_09_P042956	euchromatic gene	9.67499	8.16709	9.65638	8.78679	9.52235	9.52561	9.9995	9.61284	9.71298	9.72915	9.84733	9.39323	9.5011	9.40294	9.5159	9.35916	9.36151	9.52673	9.69342	8.39895	9.97937
A_09_P043091	euchromatic gene	10.097	8.92947	10.6284	10.3709	10.4182	10.5875	10.5136	10.3461	10.5882	10.4062	10.7245	9.90388	9.9832	10.1651	10.1331	10.335	9.93053	10.3197	10.1466	9.43371	10.4807
A_09_P043096	euchromatic gene	9.73184	8.87988	9.88481	9.11134	10.6261	11.2502	10.4375	10.048	11.3416	10.2365	11.4731	10.1036	10.3026	10.4633	10.3159	10.1087	10.0285	10.1621	9.98203	10.1342	11.1454
A_09_P043101	euchromatic gene	13.2808	12.9949	13.0152	12.9284	13.1161	13.2245	13.8703	13.2855	12.9973	13.411	13.2565	13.8629	13.5483	13.0867	12.9111	13.3335	13.7327	13.2278	13.71	13.8991	14.0558
A_09_P043106	euchromatic gene	11.1909	9.92137	11.3799	10.7267	11.059	11.1998	11.3437	11.3415	11.2596	11.3144	11.3024	11.0488	11.0514	11.0479	11.2174	11.0761	10.9388	11.0906	11.2315	10.4872	11.574
A_09_P043111	euchromatic gene	10.3836	8.54835	10.9144	9.21942	10.1125	10.5769	10.014	10.0265	10.4946	10.2068	10.749	9.51022	9.78486	10.0452	10.2632	9.93507	9.71272	9.91347	9.75296	8.31239	10.017
A_09_P043116	euchromatic gene	9.9087	8.03177	9.54141	8.64848	9.61097	9.72851	9.76194	9.71838	9.81709	9.76281	10.0317	9.13521	9.2437	9.74376	9.6319	9.583	9.16437	9.64628	9.47107	7.88033	9.57888
A_09_P043121	euchromatic gene	10.1941	9.03431	10.8527	10.9398	10.7202	10.9286	10.6955	11.1265	10.9676	11.1187	11.0207	10.1926	10.1844	10.5816	10.8505	11.341	10.324	11.1368	10.4717	9.9676	10.6141
A_09_P043126	euchromatic gene	9.30723	7.72588	9.43377	8.68881	8.6118	8.5959	9.66516	7.90196	8.80157	9.32793	9.16294	8.9912	9.08753	9.2573	9.04863	9.03479	9.01631	9.07237	9.12814	8.14304	9.51658
A_09_P043131	euchromatic gene	9.46083	8.09767	9.93987	9.0873	9.63127	9.71631	9.94542	9.80726	9.84357	9.64721	9.91321	9.29748	9.48235	9.4852	9.43251	9.44972	9.34763	9.41597	9.60063	8.36766	9.71622
A_09_P043136	euchromatic gene	9.10299	7.73872	9.28171	8.48773	9.10614	9.18015	9.51308	9.15562	9.22272	9.17812	9.31805	8.99111	9.14272	9.03012	9.11226	9.06875	8.9709	9.04122	9.37785	8.12578	9.46219
A_09_P043141	euchromatic gene	8.88587	7.43188	9.31889	8.70408	8.61884	8.53935	9.13444	8.70094	8.70628	8.9648	8.60199	8.61446	8.84587	8.7162	8.79005	8.69182	8.6663	8.79423	9.01028	7.81067	8.8655
A_09_P043146	euchromatic gene	9.64004	7.9869	10.0323	9.06041	9.54063	9.90233	10.0222	9.69143	9.67989	9.63569	9.7408	9.30078	9.40696	9.21818	9.31447	9.38326	9.45566	9.37656	9.69009	8.45065	9.73979
A_09_P043151	euchromatic gene	8.74727	7.57144	9.06375	8.41642	8.82404	8.86142	9.06945	8.59897	8.93752	8.59451	9.10073	8.65607	8.71853	8.75983	8.70696	8.46663	8.78371	8.54785	9.02289	7.86362	8.97846
A_09_P043156	euchromatic gene	9.49327	7.97889	10.4306	9.11801	9.60016	9.68428	9.85912	9.6893	9.63328	9.50016	9.71127	9.62221	9.56674	9.34312	9.14733	9.25519	9.51697	9.37977	9.90873	8.40192	9.72813
A_09_P043161	euchromatic gene	10.4849	8.92685	9.50741	8.77358	10.0769	10.1649	10.1874	10.1164	10.281	10.3943	10.5128	9.75756	9.88262	10.3171	10.1513	9.96847	9.7614	10.1838	10.0862	8.66857	10.2489
A_09_P043166	euchromatic gene	9.54555	8.12906	9.44678	8.57491	9.4166	9.48025	10.0978	9.60451	9.67657	9.60101	9.75358	9.50667	9.89154	9.58888	9.57088	9.42922	9.43032	9.42393	9.69426	8.42351	9.98475
A_09_P043171	euchromatic gene	8.6597	7.77191	9.65065	9.18374	8.77093	8.68956	9.0571	8.75417	8.70794	8.84773	8.76392	9.28626	8.71976	8.71739	8.48165	8.72678	8.80673	8.67324	9.02381	8.25744	9.03275
A_09_P043176	euchromatic gene	10.2272	8.59912	10.3472	9.26093	10.0342	10.0793	9.95681	9.84732	10.2056	9.91862	10.264	9.64163	9.68868	9.89735	9.66671	9.72073	9.66034	9.61722	10.0322	8.67763	10.0495
A_09_P043181	euchromatic gene	10.2561	9.23519	10.7616	10.2945	10.8105	11.2079	10.8622	10.5066	11.0799	10.6018	11.2596	10.0479	10.0401	10.1969	10.1907	10.4757	10.2077	10.3361	10.2924	9.51567	10.6438
A_09_P043186	euchromatic gene	9.05429	7.64252	8.86492	8.13595	9.02737	9.11128	9.26835	9.0829	9.1208	8.84674	9.30824	8.64745	8.73737	8.81485	8.62595	8.86954	8.72922	8.76994	8.92136	7.90788	8.86339
A_09_P043191	euchromatic gene	9.34316	7.94153	8.67014	8.10271	9.13198	8.99133	9.38938	9.0073	9.05728	9.04689	9.16703	9.04746	9.03615	9.00819	8.99362	8.59999	8.99634	8.75651	9.26776	8.22988	9.33427
A_09_P043196	euchromatic gene	9.52184	8.18882	9.22413	8.4933	9.0988	9.05505	9.7762	9.43301	9.19735	9.50981	9.28883	9.31441	9.39969	9.3612	9.35236	9.15224	9.31197	9.2864	9.74571	8.29805	9.69756
A_09_P043206	euchromatic gene	9.81203	8.43974	9.82431	9.19422	9.74565	9.73665	10.2308	9.83599	9.74009	10.0178	9.83469	9.63798	9.76996	9.88472	9.79809	9.58363	9.64227	9.63758	10.0033	8.90321	10.049
A_09_P043211	euchromatic gene	9.74642	7.95649	9.6756	8.62543	9.84812	10.0451	10.0252	9.59813	10.0881	9.71845	10.1362	9.19305	9.38178	9.46699	9.38774	9.6517	9.33398	9.49444	9.82196	8.18038	9.67826
A_09_P043216	euchromatic gene	9.73457	7.92791	9.94823	8.93569	9.45084	9.51986	9.89938	9.59774	9.71549	9.6369	9.70675	9.45645	9.54731	9.44038	9.31402	9.30023	9.45473	9.27516	9.77976	8.30002	9.74672
A_09_P043226	euchromatic gene	8.01376	7.21514	8.91176	8.23901	8.24161	8.21744	8.49305	8.07988	8.20792	8.1431	8.60142	8.04157	7.71662	7.90601	8.0056	8.05178	8.13856	8.22641	8.23051	7.49299	8.54016
A_09_P043296	euchromatic gene	8.5291	7.47803	8.55905	8.18718	8.63869	8.64441	8.37651	8.20379	8.55502	8.09226	8.10794	8.07307	8.3796	8.25422	8.11625	8.18192	8.07339	7.93621	8.61565	7.45483	8.14346
A_09_P043301	euchromatic gene	10.0483	8.28116	10.2045	9.20628	9.702	9.74694	10.2723	10.0799	9.91987	9.87822	10.01	9.69961	9.75861	9.67563	9.53266	9.51287	9.7102	9.6207	10.1811	8.59145	10.3237
A_09_P043311	euchromatic gene	9.06574	7.69687	9.81279	8.76425	9.1462	9.22851	9.58492	9.20189	9.29791	8.91705	9.4162	9.07135	9.13555	9.06643	8.9226	8.84208	9.03457	8.86762	9.41442	8.03006	9.58906
A_09_P043346	euchromatic gene	10.1152	9.41186	10.4083	9.66618	10.3288	10.1343	10.5015	10.43	10.3617	10.4661	10.4848	10.373	10.4386	10.4301	10.2463	10.138	10.215	10.2229	10.554	10.2526	10.6381
A_09_P043366	euchromatic gene	9.52286	7.94701	9.48068	8.50662	9.84552	9.47488	9.9119	9.54582	9.59694	9.47491	9.61854	9.28284	9.34108	9.39836	9.46759	9.19841	9.30634	9.38305	9.57782	8.24012	9.78156
A_09_P043441	euchromatic gene	9.06898	8.66404	9.05776	8.41371	10.2771	10.7272	9.39651	9.62168	10.7163	9.76871	10.9462	9.4092	9.19246	10.0468	9.8447	9.83789	9.1227	9.75919	9.45069	8.94068	9.69924
A_09_P043511	euchromatic gene	10.3147	8.30391	10.6596	9.39953	10.2987	10.3148	10.7211	10.3875	10.4112	10.4098	10.581	10.076	10.1384	10.1961	10.0483	10.0351	10.0711	10.1008	10.3672	8.66517	10.3916
A_09_P043516	euchromatic gene	9.01521	7.60203	9.24661	8.57162	8.98301	8.80877	9.11449	9.02112	8.94494	8.94532	8.96333	8.61045	8.86791	8.72418	9.42097	8.86638	8.72042	8.77169	9.1896	7.79591	9.06743
A_09_P043576	euchromatic gene	8.33983	7.40293	8.39962	8.32923	8.45136	8.61322	8.95711	8.58992	8.6538	8.48985	8.74218	8.48302	8.38337	8.37766	8.40106	8.46265	8.44801	8.47839	8.7226	7.57003	8.81629
A_09_P043701	euchromatic gene	9.18817	7.97887	9.21579	8.31027	8.88036	9.19831	9.51999	9.22853	9.12646	8.85952	9.36426	9.0834	9.15542	8.88944	8.77628	8.90273	9.1051	8.81281	9.34379	8.21047	9.52843
A_09_P043706	euchromatic gene	9.2378	7.85885	9.84731	8.68391	9.25981	9.44377	9.65375	9.05473	9.47976	9.0258	9.59344	9.05085	8.93182	8.96675	8.89623	8.70822	8.97804	8.85475	9.33742	7.94996	9.6165
A_09_P043761	euchromatic gene	10.0976	9.92277	11.3424	10.8128	10.9095	10.8698	10.1441	10.6395	10.563	10.4144	10.3287	9.64295	9.80768	10.5343	10.9374	10.9891	9.57562	10.7379	9.30741	9.58168	9.82226
A_09_P043836	euchromatic gene	8.54944	7.58356	9.02721	8.59108	8.58219	8.59571	8.89602	8.52054	8.61682	8.62209	8.75596	8.36433	8.81708	8.49751	8.45582	8.43558	8.55952	8.52573	9.00308	7.6526	8.82426
A_09_P043851	euchromatic gene	9.23185	8.01748	9.85182	8.57495	9.24537	9.35882	9.70514	9.91849	9.33615	9.38203	9.48104	9.23651	8.72107	9.15539	9.19751	9.71771	9.19199	9.2856	9.84389	8.1913	9.5971
A_09_P043861	euchromatic gene	8.37634	7.52409	9.26772	8.53202	8.59272	8.7352	8.76674	8.39569	8.61214	8.3791	8.62809	8.8545	8.35452	8.50221	8.34	8.3218	8.40311	8.39032	8.77866	7.60416	8.83539
A_09_P043866	euchromatic gene	10.3834	8.50635	10.1646	8.94721	10.0588	10.075	10.4705	10.5458	10.2218	10.4472	10.2863	9.93751	9.95528	10.1998	10.222	10.1541	9.77788	10.1658	10.118	8.66124	10.4515
A_09_P043871	euchromatic gene	8.40986	7.44089	8.93965	8.34394	8.41479	8.54408	8.89218	8.5167	8.5273	8.22791	8.57532	8.41072	8.37545	8.58061	8.30417	8.19359	8.49078	8.31607	8.69322	7.62944	8.61667
A_09_P043906	euchromatic gene	8.7714	7.51471	9.31961	8.66358	8.7772	8.67148	8.94063	8.68531	8.6441	8.65179	8.68361	8.50578	8.74338	8.56689	8.56721	8.59715	8.6418	8.63526	9.00929	7.84868	9.07139
A_09_P043911	euchromatic gene	10.0621	8.20668	10.1963	9.20261	9.81045	9.58734	10.0428	9.80727	9.79329	9.89404	9.93872	9.60874	9.78677	9.606	9.60002	9.4025	9.66284	9.57333	10.0529	8.70622	10.3412
A_09_P043916	euchromatic gene	9.8238	8.31465	9.51735	8.81845	9.66449	9.50409	10.046	9.96663	9.66403	9.85878	9.76538	9.60378	9.64366	9.73521	9.9122	9.71095	9.49613	9.73109	9.87953	8.7175	10.1079
A_09_P043956	euchromatic gene	8.18185	7.16532	8.84294	8.30647	8.32954	8.19752	8.63424	8.13014	8.32891	8.14914	8.2655	8.00831	8.23172	8.1749	8.09337	7.95611	8.26999	8.15017	8.31771	7.50427	8.31619
A_09_P044006	euchromatic gene	9.53302	8.40737	9.94443	9.55117	9.9313	9.99163	9.73642	10.0044	9.8458	9.64591	10.1976	9.28485	9.26517	9.67588	9.63028	9.89401	9.25363	9.71925	9.46344	8.44046	9.76305
A_09_P044061	euchromatic gene	9.93524	8.3606	9.54226	8.27573	9.98573	9.99499	9.87986	9.89033	10.1012	9.95427	10.2447	9.65161	9.5888	9.75027	9.72542	9.57046	9.64265	9.77872	10.036	8.39192	10.0227
A_09_P044086	euchromatic gene	9.03642	7.65895	9.20701	8.54517	8.90352	8.75747	9.39172	9.05302	8.94772	9.21187	8.92872	8.7692	8.95346	8.94262	8.94163	8.78436	8.97935	8.80457	9.27195	8.01564	9.49888
A_09_P044221	euchromatic gene	9.5327	7.90615	9.18333	8.36462	9.30275	9.09429	9.39743	9.33061	9.18911	9.34138	9.30691	9.18964	9.15563	9.29917	9.38873	9.07809	9.12905	9.24226	9.33434	8.18417	9.29801
A_09_P044226	euchromatic gene	8.83654	7.50187	9.03554	8.02299	8.93012	8.96148	9.16355	8.925	8.86156	8.79557	9.09455	8.62426	8.87575	8.68397	8.70095	8.81015	8.79444	8.95592	8.78261	7.84643	8.99105
A_09_P044246	euchromatic gene	9.53263	7.97677	9.62802	8.55035	9.59477	9.70221	9.56414	9.69137	9.92781	9.52324	10.1109	8.75387	8.92272	9.38026	9.23461	9.13007	8.88455	9.24408	9.17629	7.78356	9.42161
A_09_P044311	euchromatic gene	9.13143	7.66195	9.42253	8.40585	9.25982	9.49678	9.34577	9.15165	9.3529	9.04982	9.62432	8.93305	9.02172	8.91158	8.87846	9.90413	9.02167	8.98577	9.26675	8.07028	9.265
A_09_P044356	euchromatic gene	13.1282	12.8573	13.4922	13.4517	13.4072	13.3562	12.6336	13.3105	13.3194	13.1555	13.3678	12.4045	12.3336	13.1372	13.0668	13.3317	12.3209	13.2427	12.2095	12.4471	12.7945
A_09_P044376	euchromatic gene	9.02166	7.71014	9.32093	8.57992	9.05272	9.23436	9.23906	8.8772	9.06596	8.89387	9.09442	8.8969	8.85434	8.82323	8.71003	8.52997	8.91187	8.88054	9.0107	7.93758	8.92067
A_09_P044406	euchromatic gene	8.79837	7.61597	9.36581	8.5667	8.72229	8.58623	8.99253	8.74136	8.61159	8.69668	8.73624	8.58573	8.72649	8.67976	8.60854	8.38984	8.603	8.62379	8.81488	7.75033	8.86457
A_09_P044451	euchromatic gene	10.7814	8.81061	11.3462	9.77821	10.9271	10.9874	10.7415	10.8314	11.0443	10.7647	11.0379	10.2619	10.2457	10.53	10.6571	10.3844	10.0742	10.4287	10.5364	8.9164	10.6028
A_09_P044476	euchromatic gene	8.01216	7.04725	8.05051	7.71154	8.06008	8.18522	8.54823	8.20717	8.01866	8.20399	8.08212	7.92059	8.16203	8.16055	8.07082	7.95896	8.11957	8.10946	8.25748	7.45206	8.42788
A_09_P044521	euchromatic gene	9.12085	8.26415	10.0066	9.62102	9.29746	9.48503	9.64528	9.32236	9.45877	9.48221	9.71755	9.06981	9.28703	9.06033	9.32466	9.53432	9.16217	9.36832	9.40288	8.84533	9.85869
A_09_P044531	euchromatic gene	9.19427	8.0179	10.1038	8.92473	9.39262	9.68881	9.49438	9.16297	9.51067	9.26928	9.5948	8.98537	9.31396	9.04176	9.00319	8.9834	9.07211	9.17549	9.5116	8.32743	9.38115
A_09_P044586	euchromatic gene	9.24326	7.93309	9.36728	8.46048	9.30231	9.47509	9.41021	9.19903	9.29281	9.09039	9.54019	9.07252	9.04813	8.96337	8.90763	8.88199	9.12007	9.02886	9.36226	8.13809	9.35469
A_09_P044636	euchromatic gene	9.37609	8.37792	9.46521	8.77159	9.37804	9.26394	9.89199	9.30838	9.44324	9.74614	9.40332	9.14821	9.21122	9.41625	9.34217	9.16832	9.00713	9.35585	9.44301	8.17288	9.63369
A_09_P044696	euchromatic gene	8.9178	7.70959	9.0457	8.64295	8.79801	9.09438	9.12717	8.70933	9.00355	8.84872	9.13304	8.90611	8.86592	8.66405	8.7032	8.63677	8.86311	8.79744	9.14334	7.97869	9.2171
A_09_P044771	euchromatic gene	9.3824	7.81123	9.81245	8.68953	9.53396	9.63317	9.55538	9.23993	9.59167	9.27303	9.63983	9.22805	9.12056	9.28884	9.09882	8.93353	9.08546	9.07932	9.47318	8.05349	9.5325
A_09_P044791	euchromatic gene	8.42894	7.40908	8.79719	8.18043	8.65827	8.83568	9.0463	8.64673	8.66525	8.49708	8.85722	8.5273	8.60178	8.6259	8.40331	8.52378	8.56205	8.47691	8.64961	7.75926	8.78813
A_09_P044801	euchromatic gene	9.53322	8.01368	9.68082	8.86977	9.43779	10.1088	9.43368	9.39878	9.27552	9.30926	9.39863	9.01202	9.33847	9.11921	9.18778	9.00008	9.11406	9.01527	9.47351	8.40242	9.82297
A_09_P044851	euchromatic gene	8.97669	7.67128	9.75852	8.65167	9.22785	8.99473	9.56001	8.96785	9.18491	9.13479	9.4518	8.67979	9.24692	9.13671	9.21153	8.95918	9.13164	9.18027	9.33803	8.07316	9.46993
A_09_P044856	euchromatic gene	10.0054	8.46491	10.5496	9.4332	9.78327	9.63653	10.0471	10.0058	9.7718	9.86377	9.84582	9.6724	9.72632	9.66679	9.78953	9.70851	9.56424	9.74613	10.0952	8.6093	9.96935
A_09_P044971	euchromatic gene	10.2414	8.4837	10.5419	9.29764	10.2481	10.174	10.3229	10.1486	10.3953	10.11	10.7232	9.89341	9.98982	9.96685	10.0373	9.63856	9.82481	9.82554	10.2818	8.72283	10.4581
A_09_P045041	euchromatic gene	9.59404	8.16427	9.66594	8.7719	9.51587	9.64623	9.9217	9.65183	9.56449	9.46925	9.70125	9.46406	9.5068	9.52777	9.37397	9.26829	9.35509	9.34599	9.6528	8.36634	9.80662
A_09_P045151	euchromatic gene	8.84451	7.70883	9.20104	8.58221	8.85135	8.87208	9.08744	8.83966	9.05868	8.86954	9.14521	8.83912	8.91993	8.76528	8.77439	8.75745	8.88782	8.83444	9.0711	8.11894	9.0341
A_09_P045171	euchromatic gene	10.2412	8.4763	10.4176	8.9537	10.4454	10.7938	10.3115	10.2641	10.6226	10.2233	10.9957	9.73657	9.66794	10.2142	9.90227	10.1061	9.67455	9.90698	9.98956	8.26803	10.2944
A_09_P045216	euchromatic gene	9.68826	8.10475	9.56872	8.38272	10.2102	10.5971	9.4799	9.80089	10.4452	9.87101	10.7224	9.23016	9.07286	9.81523	9.7727	9.60568	9.04844	9.75438	9.28122	7.94058	9.70859
A_09_P045266	euchromatic gene	8.77324	7.64505	9.27446	8.54972	8.36852	8.32204	8.73371	8.4657	8.37303	8.32682	8.48435	8.46163	8.68799	8.30798	8.26512	8.34584	8.52527	8.33688	8.82716	7.68056	8.86723
A_09_P045286	euchromatic gene	9.36016	7.90779	9.38636	8.47407	9.51751	9.55298	9.19903	9.41372	9.66463	9.22645	9.89571	8.64978	8.66282	9.1903	9.02254	9.08296	8.77408	9.14327	9.1011	7.52592	9.30462
A_09_P045301	euchromatic gene	9.16452	7.64258	9.18077	8.5184	8.79806	8.7209	9.51063	9.04388	8.61997	9.07252	8.46774	8.93829	9.06218	8.91542	8.79042	8.86087	9.00579	9.18862	8.97094	8.07804	9.45265
A_09_P045371	euchromatic gene	9.55899	7.96513	10.3704	9.10707	9.48854	9.6217	9.57786	9.45743	9.60266	9.33793	9.60769	9.2941	9.45643	9.33336	9.12003	9.26747	9.26065	9.16084	9.73922	9.26934	9.8448
A_09_P045416	euchromatic gene	8.38517	7.41852	8.90019	8.20291	8.55849	8.61798	9.07614	8.74911	8.46087	8.38562	8.74897	8.48479	8.46591	8.50005	8.38787	8.51787	8.65681	8.50175	8.64161	7.67878	8.7494
A_09_P045571	euchromatic gene	9.38683	7.85365	10.1468	8.94764	9.76198	9.7521	9.7733	9.50535	9.76026	9.36312	9.87895	9.22052	9.35607	9.37616	9.57078	9.45311	9.19144	9.35211	9.60754	8.1275	9.86968
A_09_P045581	euchromatic gene	10.525	8.60118	9.97366	9.00964	10.3399	10.4009	10.8218	10.6092	10.7202	10.62	10.938	10.0198	10.195	10.3968	10.2658	10.4351	10.1461	10.1602	10.429	8.94521	10.7844
A_09_P045626	euchromatic gene	9.0358	7.6569	9.66792	8.66139	9.4594	9.67758	9.57628	9.22054	9.47274	9.12859	9.74447	8.96991	9.00301	9.18525	9.23729	9.06578	8.98948	9.15626	9.06375	7.88905	9.30784
A_09_P045701	euchromatic gene	10.3004	8.62995	10.4974	9.38913	10.1376	10.1631	10.4468	10.3374	10.3393	10.341	10.4468	10.0417	10.1112	10.0503	10.3248	10.0468	10.0208	10.069	10.2865	9.02463	10.6687
A_09_P045726	euchromatic gene	11.0055	9.02752	10.9464	9.5529	10.7443	10.9158	11.3065	10.8457	11.0184	10.7833	11.1471	10.6664	10.6669	10.6734	10.6235	10.4209	10.5247	10.4508	10.9345	9.25689	11.0756
A_09_P045756	euchromatic gene	9.67602	8.12921	9.94265	9.10581	9.63538	9.72299	10.0324	9.66946	9.91801	9.67308	9.8716	9.39912	9.45342	9.62069	9.41802	9.61241	9.34166	9.39441	9.60822	8.35713	9.62743
A_09_P045811	euchromatic gene	9.91103	8.93121	9.38281	8.53524	9.39924	9.26914	9.61415	9.60272	9.37137	9.63564	9.44302	9.11557	9.14436	9.41088	9.30966	9.1554	9.05663	9.31816	9.32548	8.50921	9.51384
A_09_P045886	euchromatic gene	10.2396	8.44854	10.2767	9.1874	10.1857	10.3735	10.6514	10.4579	10.4417	10.4588	10.6108	10.0315	10.1468	10.3827	10.4046	10.2433	9.95413	10.2168	10.1844	8.77369	10.4609
A_09_P045896	euchromatic gene	9.87784	8.02535	9.95961	8.6836	9.98582	9.94592	10.2072	10.0621	9.92423	10.0361	10.028	9.48427	9.59275	9.70897	9.79495	9.71224	9.45022	9.80241	9.82293	8.35359	9.951
A_09_P045941	euchromatic gene	10.3727	8.40769	10.0328	8.87806	10.2145	10.3254	9.96411	10.0716	10.37	10.2221	10.4237	9.5763	9.57141	10.041	9.89196	9.908	9.52583	9.85965	9.8633	8.19418	10.1116
A_09_P045976	euchromatic gene	8.72478	7.62267	8.79305	8.85005	8.81695	8.77159	8.93774	8.56396	8.72581	8.59178	8.82333	8.45986	8.80281	8.51938	8.49416	8.43682	8.73907	8.57482	9.02308	7.87804	8.88354
A_09_P046011	euchromatic gene	10.8733	9.04705	10.9687	9.7515	10.7854	10.6936	10.6147	10.8476	10.7507	10.7988	10.9011	10.2209	10.2093	10.48	10.418	10.6494	10.1156	10.3253	10.6611	8.86819	10.7956
A_09_P046026	euchromatic gene	8.60638	7.54012	8.72027	8.29374	8.8469	8.93029	8.95714	8.63547	8.72314	8.62571	9.17438	8.3131	8.53448	8.75551	8.55298	8.4695	8.75482	8.49472	8.75303	7.66877	9.04123
A_09_P046071	euchromatic gene	10.103	8.2078	10.0058	8.60298	9.98623	10.0018	10.4366	9.86678	10.164	9.87038	10.2171	9.74563	9.82501	9.73328	9.7611	9.4884	9.72822	9.62512	10.036	8.73601	10.1642
A_09_P046081	euchromatic gene	10.1212	8.64067	10.0143	8.83516	10.1052	10.1392	10.2653	10.0188	10.1819	9.99871	10.3952	9.64541	9.84839	9.84671	9.75206	9.41727	9.7925	9.70413	10.084	8.76274	10.1278
A_09_P046086	euchromatic gene	13.4506	12.9874	13.422	13.6868	14.0948	14.4132	13.715	14.1268	14.2993	14.087	14.5452	13.7129	13.6014	14.1017	14.3014	14.5895	13.7935	14.3349	13.6519	13.6721	13.9005
A_09_P046096	euchromatic gene	11.0682	9.94622	11.3657	10.4058	11.2249	11.5289	11.1207	11.3568	11.4304	11.2366	11.7743	10.9427	10.7658	11.0121	11.1347	11.0608	10.5674	10.9373	10.9036	10.3245	11.2376
A_09_P046206	euchromatic gene	10.367	8.71889	10.5456	9.43426	10.8361	10.6448	10.7973	10.1634	10.2879	10.0955	10.4717	10.3911	9.96354	9.91461	9.89232	9.59755	9.86597	9.74272	10.5118	8.95585	10.6647
A_09_P046346	euchromatic gene	8.94236	7.80742	8.81505	8.09156	8.63483	8.94267	9.17743	8.92443	8.94101	8.65732	9.27062	8.98311	8.95708	8.79804	8.54954	8.60051	8.96351	8.6444	9.21498	7.89826	9.27384
A_09_P046351	euchromatic gene	10.1012	8.65191	10.7386	9.60949	10.5167	10.6377	10.4474	10.2423	10.719	10.2719	10.9134	10.0054	10.2254	10.346	10.5374	10.2086	9.86127	10.195	10.2724	8.98045	10.7234
A_09_P046356	euchromatic gene	9.86061	8.20133	10.2251	9.10504	10.0097	10.2107	10.0637	10.1091	10.3653	9.98868	10.3734	9.45574	9.49258	9.92523	9.86184	9.63232	9.3136	9.71389	9.67958	8.20824	9.86062
A_09_P046371	euchromatic gene	9.61741	7.92309	9.40494	8.38925	9.45237	9.36829	9.99775	9.43593	9.45909	9.67344	9.52315	9.43236	9.47645	9.50273	9.43535	9.28966	9.32035	9.29198	9.60874	8.4138	9.69165
A_09_P046376	euchromatic gene	11.1837	10.4051	10.8157	10.0987	10.649	10.8779	10.9901	11.2434	10.8658	11.0821	11.1022	11.4356	10.6383	10.8754	10.7448	11.1649	10.6664	10.9356	10.8318	10.3578	11.0045
A_09_P046381	euchromatic gene	9.59044	8.13638	9.32303	8.36883	9.34804	9.12997	9.56589	9.33258	9.36105	9.1751	9.23785	9.2339	9.34161	8.98862	8.97166	8.80296	9.11502	8.97784	9.35966	8.34765	9.55493
A_09_P046436	euchromatic gene	10.0474	8.39742	9.57698	8.86901	10.3284	10.3845	10.517	9.8598	10.0161	9.93404	10.1026	10.0194	9.54823	9.9455	9.92024	9.69016	9.4864	9.7013	10.1073	8.48268	10.3073
A_09_P046461	euchromatic gene	10.6052	8.8612	10.1633	8.98499	10.3534	10.1986	10.6542	10.3972	10.4093	10.5531	10.4494	10.3163	10.2766	10.4731	10.2159	9.97754	10.1627	10.095	10.5584	9.32022	10.8806
A_09_P046476	euchromatic gene	9.95401	8.2137	9.50897	8.33467	9.84406	9.84966	9.51041	10.1685	9.91253	10.0573	9.90887	9.19393	9.20732	9.8422	9.86	9.69795	9.19372	9.76775	9.6067	8.08066	9.82001
A_09_P046546	euchromatic gene	9.68941	7.94964	9.70768	8.87565	9.43036	9.44145	9.88399	9.49443	9.61992	9.63809	9.60814	9.35246	9.49259	9.49009	9.47534	9.56606	9.33131	9.41115	9.76366	8.46249	9.86222
A_09_P046581	euchromatic gene	10.8126	9.43041	11.0731	10.4082	10.9554	11.2164	10.9067	10.7686	11.1236	10.9113	11.3614	10.7247	10.6441	10.6699	10.7486	10.8782	10.4774	10.6421	11.035	9.78685	11.2597
A_09_P046791	euchromatic gene	9.52804	7.85359	9.2745	8.37691	9.69514	9.59266	9.673	9.27764	9.46535	9.33955	9.51906	9.23874	9.36894	9.35047	9.31992	9.19836	9.21991	9.16222	9.42554	8.01332	9.51041
A_09_P046821	euchromatic gene	9.31114	7.77947	9.57431	8.67559	9.61835	9.90168	9.83009	9.38437	9.59301	9.32445	9.76775	9.42298	9.34236	9.33681	9.31096	9.34173	9.3307	9.22417	9.58634	8.30402	9.5917
A_09_P046831	euchromatic gene	8.87408	7.69393	9.17135	8.47534	9.02793	8.86874	9.23704	8.98998	8.99224	9.07376	9.0373	8.69459	8.82999	8.7683	8.83786	8.68385	8.83851	8.76681	9.13104	7.88679	9.27616
A_09_P046841	euchromatic gene	9.34045	7.83645	9.721	8.44699	9.42024	9.15588	9.53207	9.1571	9.37244	9.17151	9.51572	8.94841	9.06996	9.00754	9.14354	8.80241	9.01449	9.04358	9.27212	8.03008	9.54038
A_09_P046876	euchromatic gene	10.2473	8.45697	10.2005	9.22496	10.1219	10.1684	9.84558	10.2305	10.2927	10.3866	10.2658	9.66941	9.70187	10.2318	10.1207	9.87132	9.56649	10.001	10.0148	8.36986	10.0223
A_09_P046921	euchromatic gene	9.90138	8.2118	9.94944	8.60255	10.0015	9.71274	9.99422	9.76389	10.0428	9.71316	10.1975	9.52688	9.57694	9.53146	9.58898	9.24597	9.50961	9.40237	9.80964	8.56043	9.88651
A_09_P046956	euchromatic gene	8.44979	7.2645	9.07897	8.21736	8.55221	8.45756	8.91528	8.52861	8.47505	8.56177	8.55666	8.35522	8.41756	8.33141	8.3084	8.33516	8.43973	8.41707	8.63482	7.5967	8.64161
A_09_P046966	euchromatic gene	12.2373	11.774	11.8419	11.6559	12.1312	12.0646	12.2362	12.1757	12.1391	12.3469	12.1324	11.9997	11.9826	12.2283	12.5681	12.5441	11.9149	12.3278	11.9813	12.0053	12.5378
A_09_P046976	euchromatic gene	9.89136	8.94061	10.3659	10.1251	10.2567	10.1768	10.2724	10.2175	10.198	10.186	10.3978	9.70694	9.76194	9.98136	9.9241	10.004	9.71249	9.97783	9.88937	9.25097	10.0279
A_09_P047006	euchromatic gene	9.16781	7.74813	9.54926	8.74134	9.11667	9.15248	9.40367	9.2481	9.22368	9.16144	9.42917	9.12713	8.96457	8.90678	9.02118	8.84644	8.9881	9.0613	9.17513	7.93436	9.38618
A_09_P047196	euchromatic gene	8.72015	7.64862	9.15068	8.20163	8.81864	8.85654	9.12922	8.73293	8.88209	8.76385	9.03333	8.67539	8.64735	8.73688	8.77742	8.52433	8.74197	8.69955	8.89535	7.73438	8.79746
A_09_P047281	euchromatic gene	9.03496	7.60189	9.4068	8.5596	9.20232	9.27642	9.52713	9.10848	8.96699	9.02662	9.24801	8.86324	9.02621	8.9839	9.05034	8.88715	9.00217	8.86812	9.12875	7.89835	9.2688
A_09_P047286	euchromatic gene	9.90852	8.22344	10.1721	9.08823	9.75697	9.8629	10.4986	9.94423	9.89823	9.84621	9.95771	9.86711	9.84799	9.79687	9.57878	9.47406	9.77254	9.60592	10.1133	8.60683	10.1114
A_09_P047366	euchromatic gene	9.62917	8.22762	9.7458	9.17586	9.47148	9.39949	9.78904	9.80962	9.65334	9.80024	9.5091	9.28529	9.37418	9.48388	10.1822	9.43816	9.29925	9.43603	9.6782	8.43747	9.83091
A_09_P047376	euchromatic gene	10.1463	9.04723	10.4759	9.88743	10.425	10.5214	10.3287	10.2104	10.3904	10.162	10.4947	9.68059	9.77544	9.974	9.888	10.0945	9.89073	10.0065	10.2362	9.14323	10.359
A_09_P047386	euchromatic gene	9.19089	7.85404	9.59011	8.73011	9.21124	9.24969	9.42108	9.03905	9.19801	9.15431	9.08638	9.02193	9.15336	9.09902	8.84706	8.88561	9.1732	8.91467	9.45307	8.37067	9.69436
A_09_P047431	euchromatic gene	9.98586	8.22428	10.3191	8.99143	9.94107	10.0281	10.0751	9.95986	10.0587	9.83601	9.97187	9.7576	9.71949	9.62155	9.72082	9.6536	9.54114	9.61886	9.98534	8.67511	10.0318
A_09_P047466	euchromatic gene	10.4501	9.02285	10.6663	9.48556	10.2871	10.2884	10.7595	10.2661	10.2741	10.1775	10.3216	9.98228	10.1962	9.9604	9.948	9.74066	9.99076	9.86889	10.2777	9.22844	10.4933
A_09_P047576	euchromatic gene	10.5377	9.82026	10.3263	8.90863	10.3686	10.4473	10.4595	10.2297	10.4837	10.4159	10.7777	9.87866	9.84307	9.77905	10.0254	9.96033	9.74378	10.0379	10.2909	9.39524	10.7217
A_09_P047591	euchromatic gene	9.83622	8.4457	9.86556	9.00202	10.2068	10.3257	9.22122	9.71028	10.4038	9.83591	10.4224	8.74913	8.87701	9.6114	9.41655	9.44196	8.75845	9.44339	9.01232	7.90279	9.46257
A_09_P047601	euchromatic gene	9.68323	8.1633	9.69902	8.51009	9.47983	9.49836	9.36532	9.3758	9.69877	9.43061	9.81291	8.96909	9.08261	9.24027	9.37764	9.01998	8.97854	9.25551	9.28791	8.05555	9.51872
A_09_P047646	euchromatic gene	9.2815	7.98933	9.11187	8.52656	9.12769	9.14504	9.52448	9.26567	9.19237	9.25596	9.27091	9.28972	9.26401	9.14557	9.1323	9.15019	9.13275	9.16118	9.54969	8.15858	9.45596
A_09_P047666	euchromatic gene	9.01299	7.56463	8.89293	8.04509	8.89034	8.89446	9.08136	9.04641	8.75405	8.96144	8.66251	8.41884	8.56882	8.63894	8.67091	8.78385	8.55849	8.90545	8.70586	7.65589	8.9177
A_09_P047751	euchromatic gene	8.84633	7.56542	9.08118	8.28573	9.07075	9.09728	9.40151	8.94882	9.08239	8.83354	9.25182	8.85213	8.96508	8.96335	8.80521	8.78391	8.96307	8.72526	9.13679	7.8923	9.29938
A_09_P047756	euchromatic gene	10.2703	9.42081	10.4317	9.84131	10.1626	10.4228	10.3625	10.063	10.526	10.52	10.7717	10.0828	10.0374	9.95279	10.1476	10.244	10.0165	10.0678	10.2903	9.5073	10.6335
A_09_P047781	euchromatic gene	9.5959	8.54059	10.2133	9.11929	9.89767	9.86342	9.55518	9.55957	9.84195	9.55242	10.1087	9.22202	9.29501	9.40462	9.50537	9.51213	9.088	9.41164	9.27545	8.5205	9.90598
A_09_P047846	euchromatic gene	8.68767	7.74629	9.22046	8.6891	8.80649	8.74964	9.31631	8.86608	8.83412	8.85792	8.83179	8.46972	8.55389	8.61659	8.56658	8.55808	8.50829	8.66899	8.72277	7.729	8.71355
A_09_P047851	euchromatic gene	9.35567	7.76031	9.10397	8.37971	9.07557	8.87397	9.64305	9.17431	8.90969	9.33048	8.91585	9.02429	9.18619	9.15662	8.99906	8.87803	9.07432	9.02087	9.34208	8.4809	9.41261
A_09_P047856	euchromatic gene	9.88693	8.19781	9.89568	8.8888	9.7654	9.70001	10.3253	9.9292	9.99039	10.0066	10.1344	9.76413	9.92608	9.87419	9.95436	9.91691	9.72779	9.88929	9.98231	8.59757	10.3006
A_09_P047881	euchromatic gene	9.7984	8.03315	10.1381	8.81074	10.026	10.0341	10.2422	10.0433	10.1852	10.019	10.237	9.65853	9.80542	9.92784	9.81194	9.65768	9.67507	9.77675	10.0389	8.41038	10.0243
A_09_P047911	euchromatic gene	10.3544	8.62193	10.4581	9.48296	10.2118	10.2259	10.698	10.1605	10.279	10.263	10.414	10.1749	10.1591	10.2298	10.1775	9.98786	10.048	9.98773	10.3387	8.99192	10.5162
A_09_P047976	euchromatic gene	9.85094	8.18883	10.3624	9.13148	10.0274	10.1766	10.5137	10.0853	10.3007	10.0601	10.5503	9.81315	9.86703	9.88978	9.78333	9.69494	9.67247	9.80009	10.0966	8.71472	10.0903
A_09_P048101	euchromatic gene	10.2454	8.3665	10.2448	9.24858	9.87473	9.66668	10.0284	9.90765	9.87705	9.92609	9.88477	9.75677	9.90578	9.72	9.82405	9.50277	9.84798	9.57715	10.1345	8.83731	10.0295
A_09_P048111	euchromatic gene	10.1539	9.30873	10.7082	10.2819	10.4553	10.6017	10.5333	10.1559	10.6694	10.3612	10.8857	9.99361	10.2653	10.7048	10.5235	10.0903	9.96608	10.1012	10.2164	9.98137	10.7351
[truncated: 35,992 more rows]
