# Supplementary material for: Mapping the pericentric heterochromatin by comparative genomic hybridization analysis and chromosome deletions in Drosophila melanogaster
Source: HighWire-hosted journal article supplement (doi:10.1101/gr.137406.112), 2012-06-28
Supplement: Supplemental_Table_9-Small_RNAs.xlsx [file Supplemental_Table_9-Small_RNAs.xlsx]

## Sheet: Sheet1
Probe ID	Category	0-1hr embryo-forward	2-6hr embryo-forward	6-10hr embryo-forward	imaginal disc-forward	female body-forward	female heads-forward	male body-forward	male heads-forward	0-1hr embryo-reverse	2-6hr embryo-reverse	6-10hr embryo-reverse	imaginal disc-reverse	female body-reverse	female heads-reverse	male body-reverse	male heads-reverse
A_09_P000046	euchromatic gene	0	0	0	0	0	0	0	0	0	0	0	0	0	0	0	0
A_09_P000051	euchromatic gene	0	0	0	0	0	0	0	0	0	0	0	0	0	0	0	0
A_09_P000056	euchromatic gene	0	0	0	0	0	0	0	0	0	0	0	0	0	0	0	0
A_09_P000061	euchromatic gene	0	0	0	0	0	0	0	0	0	0	0	0	0	0	0	0
A_09_P000066	euchromatic gene	0	0	0	0	0	0	0	0	0	0	0	0	0	0	0	0
A_09_P000086	euchromatic gene	0	0	0	0	0	0	0	0	0	0	0	0	0	0	0	0
A_09_P000161	euchromatic gene	0	0	0	0	0	0	0	0	0	0	0	0	0	0	0	0
A_09_P000166	euchromatic gene	0	0	0	0	0	0	0	0	0	0	0	0	0	0	0	0
A_09_P000196	euchromatic gene	0	0	0	0	0	0	0	0	0	0	0	0	0	0	0	0
A_09_P000201	euchromatic gene	0	0	0	0	0	0	0	0	0	0	0	0	0	0	0	0
A_09_P000206	euchromatic gene	0	0	0	0	0	0	1	0	0	0	0	0	0	0	0	0
A_09_P000261	euchromatic gene	0	0	0	0	0	0	0	0	0	0	0	0	0	0	0	0
A_09_P000346	euchromatic gene	0	0	0	0	0	0	0	0	0	0	0	0	0	0	0	0
A_09_P000356	euchromatic gene	0	0	0	0	0	0	0	0	0	0	0	0	0	0	0	0
A_09_P000361	euchromatic gene	0	0	0	0	0	0	0	0	0	0	0	0	0	0	0	0
A_09_P000366	euchromatic gene	0	0	0	0	0	0	0	0	0	0	0	0	0	0	0	0
A_09_P000371	euchromatic gene	0	0	0	0	0	0	0	0	0	0	0	0	0	0	0	0
A_09_P000376	euchromatic gene	0	0	0	0	0	0	0	0	0	0	0	0	0	0	0	0
A_09_P000381	euchromatic gene	0	0	0	0	0	0	0	0	0	0	0	0	0	0	0	0
A_09_P000391	euchromatic gene	0	0	0	0	0	0	0	0	0	0	0	0	0	0	0	0
A_09_P000446	euchromatic gene	0	0	0	0	0	0	0	0	0	0	0	0	0	0	0	0
A_09_P000451	euchromatic gene	0	0	0	0	0	0	0	0	0	0	0	0	0	0	0	0
A_09_P000456	euchromatic gene	0	0	0	0	0	0	0	0	0	0	0	0	0	0	0	0
A_09_P000466	euchromatic gene	0	0	0	0	0	0	0	0	0	0	0	0	0	0	0	0
A_09_P000531	euchromatic gene	0	0	0	0	0	0	0	0	0	0	0	0	0	0	0	0
A_09_P000546	euchromatic gene	0	0	0	0	0	0	0	0	0	0	0	0	0	0	0	0
A_09_P000771	euchromatic gene	0	0	0	0	0	0	0	0	0	0	0	0	0	0	0	0
A_09_P000781	euchromatic gene	0	0	0	0	0	0	0	0	0	0.5	0	0	0	0	0	0
A_09_P000806	euchromatic gene	0	0	0	0	0	0	0	0	0	0	0	0	0	0	0	0
A_09_P000811	euchromatic gene	0	0	0	0	0	0	0	0	0	0	0	0	0	0	0	0
A_09_P000831	euchromatic gene	0	0	0	0	0	0	0	0	0	0	0	0	0	0	0	0
A_09_P000951	euchromatic gene	0	0	0	0	0	0	0	0	0	0	0	0	0	0	0	0
A_09_P000976	euchromatic gene	0	0	0	0	0	0	0	0	0	0	0	0	0	0	0	0
A_09_P000991	euchromatic gene	0	0	0	0	0	0	0	0	0	0	0	0	0	0	0	0
A_09_P001001	euchromatic gene	0	0	0	0	0	0	0	0	0	0	0	0	0	0	0	0
A_09_P001006	euchromatic gene	0	0	0	0	0	0	0	0	0	0	0	0	0	0	0	0
A_09_P001026	euchromatic gene	0	0	0	0	0	0	0	0	0	0	0	0	0	0	0	0
A_09_P001176	euchromatic gene	0	0	0	0	0	0	0	0	0	0	0	1	0	0	0	0
A_09_P001186	euchromatic gene	0	0	0	0	0	0	0	0	0	0	0	0	0	0	0	0
A_09_P001456	euchromatic gene	0	0	0	0	0	0	0	0	0	0	0	0	0	0	0	0
A_09_P001461	euchromatic gene	0	0	0	0	0	0	0	0	0	0	0	0	0	0	0	0
A_09_P001471	euchromatic gene	0	0	0	0	0	0	0	0	0	0	0	0	0	0	0	0
A_09_P001811	euchromatic gene	0	0.5	0	0	0	0	0	0	0	0	0	0	0	0	0	0
A_09_P002076	euchromatic gene	0	0	0	0	0	0	0	0	0	0	0	0	0	0	0	0
A_09_P002081	euchromatic gene	0	0	0	0	0	0	0	0	0	0	0	0	0	0	0	0
A_09_P002086	euchromatic gene	0	0	0	0	0	0	0	0	0	0	0	0	0	0	0	0
A_09_P002136	euchromatic gene	0	0	0	0	0	0	0	0	0	0	0	0	0	0	0	0
A_09_P002141	euchromatic gene	0	0	0	0	0	0	0	0	0	0	0	0	0	0	0	0
A_09_P002166	euchromatic gene	0	0	0	0	0	0	0	0	0	0	0	0	0	0	0	0
A_09_P002206	euchromatic gene	0	0	0	0	0	0	0	0	0	0	0	0	0	0	0	0
A_09_P002346	euchromatic gene	0	0	0	0	0	0	0	0	0	0	0	0	0	0	0	0
A_09_P002351	euchromatic gene	0	0	0	0	0	0	0	0	0	0	0	0	0	0	0	0
A_09_P002466	euchromatic gene	0	0	0	0	0	0	0	0	0	0	0	0	0	0	0	0
A_09_P002486	euchromatic gene	0	0	0	0	0	0	0	0	0	0	0	0	0	0	0	0
A_09_P002506	euchromatic gene	0	0	0	0	0	0	0	0	0	0	0	0	0	0	0	0
A_09_P002521	euchromatic gene	0	0	0	0	0	0	0	0	0	0	0	0	0	0	0	0
A_09_P002601	euchromatic gene	0	0	0	0	0	0	0	0	0	0	0	0	0	0	0	0
A_09_P002606	euchromatic gene	0	0	0	1	0	0	0	0	0	0	0	1	0	0	0	0
A_09_P002611	euchromatic gene	0	0	0	0	0	0	0	0	0	0	0	0	0	0	0	0
A_09_P002636	euchromatic gene	0	0	0	0	0	0	0	0	0.5	0	2	0	0	0	0	0
A_09_P002646	euchromatic gene	0	0	0	0	1	0	0	0	0	0	0	0	0	0	0	0
A_09_P002661	euchromatic gene	0	0	0	0	0	0	0	0	0	0	0	0	0	0	0	0
A_09_P002981	euchromatic gene	0	0	0	0	0	0	0	0	0	0	0	0	0	0	0	0
A_09_P002986	euchromatic gene	0	0	0	0	0	0	0	0	0	0	0	0	0	0	0	0
A_09_P002991	euchromatic gene	0	0	0	0	0	0	0	0	0	0	0	0	0	0	0	0
A_09_P002996	euchromatic gene	0	0	0	0	0	0	0	0	0	0	0	0	0	0	0	0
A_09_P003001	euchromatic gene	1	0	0	0	0	0	1	0	0	0	0	0	0	0	0	0
A_09_P003006	euchromatic gene	0	0	0	0	0	0	0	0	5	2.5	5	0	1	0	0	0
A_09_P003011	euchromatic gene	0	0	0	0	0	0	0	0	0	0	0	0	0	0	0	0
A_09_P003016	euchromatic gene	0	0	0	0	0	0	0	0	0	0	0	0	0	0	0	0
A_09_P003021	euchromatic gene	0	0	0	1	0	0	0	0	0	0	0	0	0	0	0	0
A_09_P003026	euchromatic gene	0	0	0	0	0	0	0	0	0	0	0	0	0	0	0	0
A_09_P003031	euchromatic gene	0	0	0	0	0	0	0	0	0	0	0	0	0	0	0	0
A_09_P003036	euchromatic gene	0	0	0	0	0	0	0	0	0	0	0	0	0	0	0	0
A_09_P003041	euchromatic gene	0.5	0	0	0	6	0	4	0	0	0	0	0	0	0	0	0
A_09_P003051	euchromatic gene	0	0	0	0	0	0	0	0	0	0	0	0	0	0	0	0
A_09_P003056	euchromatic gene	0	0	0	0	0	0	0	0	0	0	0	0	0	0	0	0
A_09_P003061	euchromatic gene	0	0	0	0	0	0	0	0	0	0	0	0	0	0	0	0
A_09_P003066	euchromatic gene	0	0	0	0	0	0	0	0	0	0	0	0	0	0	0	0
A_09_P003071	euchromatic gene	0	0	0	1	0	0	0	0	0	0	0	0	0	0	0	0
A_09_P003076	euchromatic gene	0	0	0	0	0	0	0	0	0	0	0	0	0	0	0	0
A_09_P003081	euchromatic gene	0	0	0	0	0	0	0	0	0	0	0	0	0	0	0	0
A_09_P003086	euchromatic gene	0	0	0	1	0	0	0	0	0	0	0	0	0	0	0	0
A_09_P003091	euchromatic gene	0	0	0	0	0	0	0	0	0	0	0	0	0	0	0	0
A_09_P003721	euchromatic gene	0	0	0	0	1	0	0	0	0	0	0	0	0	0	0	0
A_09_P003831	euchromatic gene	0	0	0	0	0	0	0	0	0	0	0	0	0	0	0	0
A_09_P003836	euchromatic gene	0	0	0.5	0	0	0	0	0	0	0	0	0	0	0	0	0
A_09_P003846	euchromatic gene	0	0	0	0	0	0	0	0	0	0	0	0	0	0	0	0
A_09_P003851	euchromatic gene	0	0	0	0	0	0	0	0	0	0	0	0	0	0	0	0
A_09_P003861	euchromatic gene	0	0	0	0	0	0	0	0	0	0	0	0	0	0	0	0
A_09_P003896	euchromatic gene	0.5	0	0	0	0	0	0	0	0	0	0	0	0	0	0	0
A_09_P003991	euchromatic gene	0	0	0	0	0	0	0	0	0	0	0	0	0	0	0	0
A_09_P003996	euchromatic gene	0	0	0	0	0	0	0	0	0	0	0	0	0	0	0	0
A_09_P004031	euchromatic gene	0	0	0	0	0	0	0	0	0	0	0	0	0	0	0	0
A_09_P004056	euchromatic gene	0	0	0	0	0	0	0	0	0	0	0	0	0	0	0	0
A_09_P004061	euchromatic gene	0	0	0	0	0	0	0	0	0	0	0	0	0	0	0	0
A_09_P004071	euchromatic gene	0	0	0	0	0	0	0	0	0	0	0	0	0	0	0	0
A_09_P004076	euchromatic gene	0	0	0	0	0	0	0	0	0	0	0	0	0	0	0	0
A_09_P004136	euchromatic gene	0	0	0	0	0	0	0	0	0	0	0	0	0	0	0	0
A_09_P004141	euchromatic gene	0	0	0	0	0	0	0	0	0	0	0	0	0	0	0	0
A_09_P004146	euchromatic gene	0	0	0	0	0	0	0	0	0	0	0	0	0	0	0	0
A_09_P004151	euchromatic gene	0	0	0	0	0	0	0	0	0	0	0	0	0	0	0	0
A_09_P004171	euchromatic gene	0	0	0	0	0	0	0	0	0	0	0	0	0	0	0	0
A_09_P004221	euchromatic gene	0	0	0	0	0	0	0	0	0	0	0	0	0	0	0	0
A_09_P004356	euchromatic gene	0	0	0	0	0	0	0	0	0	0	0	0	0	0	0	0
A_09_P004361	euchromatic gene	0	0	0	0	0	0	0	0	0	0	0	0	0	0	0	0
A_09_P004466	euchromatic gene	0	0	0	0	0	0	0	0	0	0	0	0	0	0	0	0
A_09_P004471	euchromatic gene	0	0	0	0	0	0	0	0	0	0	0	0	0	0	0	0
A_09_P004501	euchromatic gene	0	0	0	0	0	0	0	0	0	0	0	0	0	0	0	0
A_09_P004506	euchromatic gene	0	0	0	0	0	0	0	0	0	0	0	0	0	0	0	0
A_09_P009516	euchromatic gene	0	0	0	0	0	0	0	0	0	0	0	0	0	0	0	0
A_09_P009581	euchromatic gene	0.5	0	0	0	0	0	0	0	0	0	0	0	0	0	0	0
A_09_P009621	euchromatic gene	0	0	0	0	0	0	0	0	0	0	0	0	0	0	0	0
A_09_P009736	euchromatic gene	0	0	0	0	0	0	0	0	0	0	0	0	0	0	0	0
A_09_P009786	euchromatic gene	0	0	0	1	1	0	0	0	0	0	0	0	0	0	0	0
A_09_P009826	euchromatic gene	0	0	0	0	0	0	0	0	0	0	0	0	0	0	0	0
A_09_P009856	euchromatic gene	0	0	0	0	0	0	0	0	0	0	0	0	0	0	0	0
A_09_P009926	euchromatic gene	0	0	0	0	0	0	0	0	0	0	0	0	0	0	0	0
A_09_P009936	euchromatic gene	5.5	0	1.5	0	1	0	0	0	0	0	0	0	0	0	0	0
A_09_P009941	euchromatic gene	2.5	0	0	0	0	0	2	0	0	0	0	0	0	0	0	0
A_09_P009961	euchromatic gene	0	0	0	0	0	0	0	0	0	0	0	0	0	0	0	0
A_09_P009966	euchromatic gene	0	0	0	0	0	0	0	0	0	0	0	0	0	0	0	0
A_09_P009986	euchromatic gene	0	0.5	0	1	0	0	0	0	0	0	0	0	0	0	0	0
A_09_P010001	euchromatic gene	0.5	1.5	3	0	0	0	0	0	0	0.5	0	0	0	0	0	0
A_09_P010006	euchromatic gene	0	0	0	0	1	0	0	0	0	0	0	0	0	0	0	0
A_09_P010011	euchromatic gene	0	0	0	0	0	0	0	0	0	0	0	0	0	0	0	0
A_09_P010016	euchromatic gene	0	0	0	0	1	0	0	0	0	0	0	0	0	0	0	0
A_09_P010041	euchromatic gene	0	0	0	0	0	0	0	0	0	0	0	0	0	0	0	0
A_09_P010051	euchromatic gene	0	0	0	0	0	0	0	0	0	0	0	0	0	0	0	0
A_09_P010146	euchromatic gene	0	0	0	0	0	0	0	0	0	0	0	0	0	0	0	0
A_09_P010246	euchromatic gene	0	0	0	0	0	0	0	0	0	0	0	0	0	0	0	0
A_09_P010251	euchromatic gene	0.5	0	0	0	0	0	0	0	0	0	0	0	0	0	0	0
A_09_P010351	euchromatic gene	3	0.5	0	0	3	0	2	0	0	0	0	0	0	0	0	0
A_09_P010416	euchromatic gene	0	0	0	0	0	0	0	0	0	0	0	0	0	0	0	0
A_09_P010466	euchromatic gene	0	0	0	0	0	0	0	0	0	0	0	0	0	0	0	0
A_09_P010516	euchromatic gene	0	0	0	0	0	0	0	0	0	0	0	0	0	0	0	0
A_09_P010521	euchromatic gene	0	0	0	0	0	0	0	0	0	0	0	0	0	0	0	0
A_09_P010526	euchromatic gene	6	0	2	6	8	2	5	0	0	0	0	0	0	0	0	0
A_09_P010536	euchromatic gene	0	0.5	0	0	0	0	0	0	0	0	0	0	0	0	0	0
A_09_P010636	euchromatic gene	3	0	0	0	4	0	2	0	0	0	0	0	0	0	0	0
A_09_P010706	euchromatic gene	0	0	0	0	0	0	0	0	0	0	0	0	0	0	0	0
A_09_P010741	euchromatic gene	0	0	0	0	1	0	0	0	0	0	0	0	0	0	0	0
A_09_P010756	euchromatic gene	0	0	0	0	0	0	0	0	0	0	0	0	0	0	0	0
A_09_P010761	euchromatic gene	0	0	0	0	0	0	0	0	0	0	0	0	0	0	0	0
A_09_P010846	euchromatic gene	0.5	0	0	0	0	0	0	0	0	0	0	0	0	0	0	0
A_09_P010861	euchromatic gene	0	0	0	0	0	0	0	0	0	0	0	0	0	0	0	0
A_09_P011056	euchromatic gene	0	0	0	0	0	0	0	0	0	0	0	0	0	0	0	0
A_09_P011066	euchromatic gene	0	0	0	0	0	0	0	0	0	0	0	0	0	0	0	0
A_09_P011091	euchromatic gene	0	0	0	0	0	0	0	0	0	0	0	0	0	0	0	0
A_09_P011096	euchromatic gene	0	0	0	1	0	0	0	0	0	0	0	0	0	0	0	0
A_09_P011136	euchromatic gene	0	0	0	0	0	0	0	0	0	0	0	0	0	0	0	0
A_09_P011176	euchromatic gene	4.5	1.5	0	4	1	0	2	0	0	0	0	0	0	0	0	0
A_09_P011181	euchromatic gene	0.5	0	0	4	0	0	0	0	0	0	0	0	0	0	0	0
A_09_P011196	euchromatic gene	0	0	0	0	0	0	0	0	0	0	0	0	0	0	0	0
A_09_P011271	euchromatic gene	0	0	0	0	0	0	0	0	0	0	0	0	0	0	0	0
A_09_P011276	euchromatic gene	0	0	0	0	0	0	0	0	0	0	0	0	0	0	0	0
A_09_P011341	euchromatic gene	1	0	0	1	0	0	0	0	0	0.5	0	0	0	1	0	0
A_09_P011346	euchromatic gene	0	0	0	0	0	0	0	0	0	0	0	0	0	0	0	0
A_09_P011416	euchromatic gene	0	0	0	0	0	0	0	0	0	0	0	0	0	0	0	0
A_09_P011421	euchromatic gene	0	0	0	0	0	0	0	0	0	0	0	0	0	0	0	0
A_09_P011471	euchromatic gene	0	0	0	0	0	0	0	0	0	0	0	0	0	0	0	0
A_09_P011526	euchromatic gene	0	0	0	0	0	0	0	0	0	0	0	0	0	0	0	0
A_09_P011536	euchromatic gene	1	0	0.5	0	4	0	0	0	0	0	0	0	0	0	0	0
A_09_P011561	euchromatic gene	0	1.5	0	0	0	0	0	0	0	0	0	0	0	0	0	0
A_09_P011566	euchromatic gene	0.5	0	0	0	0	0	0	0	0	0	0	0	0	0	0	0
A_09_P011741	euchromatic gene	0	0	0	0	0	0	0	0	0	0	0	0	0	0	0	0
A_09_P011746	euchromatic gene	0	0	0	0	0	0	0	0	0	0	0	0	0	0	0	0
A_09_P011771	euchromatic gene	1	0	0	0	0	0	0	0	0	0	0	0	0	0	0	0
A_09_P011781	euchromatic gene	0	0	0	0	0	0	0	0	0	0	0	0	0	0	0	0
A_09_P011786	euchromatic gene	0	0	0	0	0	0	0	0	0	0	0	0	0	0	0	0
A_09_P011806	euchromatic gene	0	0	0	0	0	0	0	0	0	0	0	0	0	0	0	0
A_09_P011816	euchromatic gene	0	0	0	0	0	0	0	0	0	0	0	0	0	0	0	0
A_09_P011831	euchromatic gene	0	0	0	0	0	0	0	0	0	0	0	0	0	0	0	0
A_09_P011936	euchromatic gene	0	0	0	0	0	0	0	0	0	0	0	0	0	0	0	0
A_09_P011941	euchromatic gene	0	0	0	0	0	0	0	0	0	0	0	0	0	0	0	0
A_09_P011946	euchromatic gene	4	0	0.5	0	10	0	2	0	0	0	0	0	0	0	0	0
A_09_P011986	euchromatic gene	0	0.5	0	0	0	0	0	0	0	0	0	0	0	0	0	0
A_09_P012051	euchromatic gene	0	0	0	0	0	0	0	0	0	0	0	0	0	0	1	0
A_09_P012056	euchromatic gene	0	0	0	0	0	0	0	0	0	0	0	0	0	0	0	0
A_09_P012116	euchromatic gene	0	0	0	0	2	0	0	1	0	0	0	0	0	0	0	0
A_09_P012121	euchromatic gene	0	0	0	0	0	0	0	0	0	0	0	0	1	0	0	0
A_09_P012126	euchromatic gene	1	1	0	0	1	1	0	0	0	0	0	0	0	0	0	0
A_09_P012156	euchromatic gene	0	0	0	0	0	0	0	0	0	0	0	0	0	0	0	0
A_09_P012161	euchromatic gene	0	0	0	0	1	0	0	0	0	0	0	0	0	0	0	0
A_09_P012201	euchromatic gene	0	0	0	0	0	0	0	0	0	0	0	0	0	0	0	0
A_09_P012211	euchromatic gene	0.5	0.5	0	0	0	0	0	0	0	0	0	0	0	0	0	0
A_09_P012231	euchromatic gene	0	0	0	0	0	0	0	0	0	0	0	0	0	0	0	0
A_09_P012341	euchromatic gene	0	0	0	0	0	0	0	0	0	0	0	0	0	0	0	0
A_09_P012376	euchromatic gene	0	0	0	0	0	0	0	0	0	0	0	0	0	0	0	0
A_09_P012386	euchromatic gene	0	0	0	0	0	0	0	0	0	0	0	0	0	0	0	0
A_09_P012411	euchromatic gene	0	0	0	0	0	0	0	0	0	0	0	0	0	0	0	0
A_09_P012436	euchromatic gene	10.5	2	4	18	5	0	3	0	0	0	0	0	0	0	0	0
A_09_P012471	euchromatic gene	0	0	0	0	0	0	0	0	0	0	0	0	0	1	0	2
A_09_P012531	euchromatic gene	0	0	0	0	0	0	0	0	0	0	0	0	0	0	0	0
A_09_P012561	euchromatic gene	0	0	0	0	0	0	0	0	0	0	0	0	0	0	0	0
A_09_P012566	euchromatic gene	0	0	0	0	0	0	0	0	0	0	0	0	0	0	0	0
A_09_P012571	euchromatic gene	0	0	0	0	0	0	0	0	0	0	0	0	0	0	0	0
A_09_P012596	euchromatic gene	0	0	0	0	0	0	1	0	0	0	0	0	0	0	0	0
A_09_P012616	euchromatic gene	0	0	0	0	0	0	0	0	0	0	0	0	0	0	0	0
A_09_P012651	euchromatic gene	0	0	0	0	0	0	0	0	0	0	0	0	0	0	0	0
A_09_P012666	euchromatic gene	0	0	0	0	0	0	0	0	0	0	0	0	0	0	0	0
A_09_P012671	euchromatic gene	0	0	0	0	0	0	0	0	0	0	0	1	0	0	0	0
A_09_P012686	euchromatic gene	1.5	0.5	0	0	5	0	2	0	0	0	0	0	0	0	0	0
A_09_P012726	euchromatic gene	0	0	0	0	0	0	0	0	0	0	0	0	0	0	0	0
A_09_P012861	euchromatic gene	0	0	0	0	0	0	0	0	0	0	0	0	0	0	0	0
A_09_P012886	euchromatic gene	0	0	0	0	0	0	0	0	0	0	0	0	0	0	0	0
A_09_P012901	euchromatic gene	0	0	0	0	0	0	0	0	0	0	0	0	0	0	0	0
A_09_P012906	euchromatic gene	0.5	0.5	0	0	0	0	0	0	0	0	0	0	0	0	0	0
A_09_P012931	euchromatic gene	0	0	0	1	0	0	0	0	0	0	0	0	0	0	0	0
A_09_P012936	euchromatic gene	0	0	0	0	0	0	0	0	0	0	0	0	0	0	0	0
A_09_P012946	euchromatic gene	0	0	0	0	0	0	0	0	0	0	0	0	0	0	0	0
A_09_P012956	euchromatic gene	0	0	0	0	0	0	0	0	0	0	0	0	0	0	0	0
A_09_P012971	euchromatic gene	0	0	0	0	0	0	0	0	0	0	0	0	0	0	0	0
A_09_P012976	euchromatic gene	0	0	0	0	0	0	0	0	0	0	0	0	0	0	0	0
A_09_P012991	euchromatic gene	2	0	0	0	1	0	0	0	0	0	0	0	0	0	0	0
A_09_P013001	euchromatic gene	0	0	0	0	0	0	0	0	2	0	0	0	0	0	0	0
A_09_P013041	euchromatic gene	0	0	0	0	0	0	0	0	0	0	0	0	0	0	0	0
A_09_P013076	euchromatic gene	0	0	0	0	0	0	0	0	0	0	1	0	0	0	0	0
A_09_P013086	euchromatic gene	0	0	0	0	0	0	0	0	0	0	0	0	0	0	0	0
A_09_P013106	euchromatic gene	0	0	0	0	0	0	0	0	0	0	0	0	0	0	0	0
A_09_P013181	euchromatic gene	0	0	0	0	0	0	0	0	0	0	0	0	0	0	0	0
A_09_P013196	euchromatic gene	0	0	0	0	0	0	0	0	0	0	0	0	0	0	0	0
A_09_P013231	euchromatic gene	0	0	0	0	0	0	0	0	0	0	0	0	0	0	0	0
A_09_P013261	euchromatic gene	0	0.5	0	0	0	0	0	0	0	0	0	0	0	0	0	0
A_09_P013266	euchromatic gene	0	0	0	0	0	0	0	0	0	0	0	0	0	0	0	0
A_09_P013281	euchromatic gene	0	0	0	0	0	0	0	0	0	0	0	0	0	0	0	0
A_09_P013301	euchromatic gene	0	0.5	0	0	0	0	0	0	0	0	0	0	0	0	0	0
A_09_P013381	euchromatic gene	0	0	0	0	0	0	0	0	0	0	0	0	0	0	0	0
A_09_P013411	euchromatic gene	0.5	0	0	0	0	0	0	0	0	0	0	0	0	0	0	0
A_09_P013421	euchromatic gene	0	0	0	0	0	0	0	0	0	0	0	0	0	0	0	0
A_09_P013431	euchromatic gene	0	0	0	0	0	0	0	0	0	0	0	0	0	0	0	0
A_09_P013461	euchromatic gene	0	0	0	0	0	0	0	0	0	0	0	0	0	0	0	0
A_09_P013481	euchromatic gene	0	0	0	0	0	0	0	0	0	0	0	0	0	0	0	0
A_09_P013526	euchromatic gene	0	0	0	0	0	0	0	0	0	0	0	0	0	0	0	0
A_09_P013531	euchromatic gene	0	0	0	0	0	0	0	0	0	0	0	0	0	0	0	0
A_09_P013536	euchromatic gene	0	0	0	0	0	0	0	0	0	0	0	0	0	0	0	0
A_09_P013541	euchromatic gene	0	0	0	0	0	0	0	0	0	0	0	0	0	0	0	0
A_09_P013546	euchromatic gene	0	0	0	0	0	0	0	0	0	0	0	0	0	0	0	0
A_09_P013551	euchromatic gene	0	0	0	0	0	0	0	0	0	0	0	0	0	0	0	0
A_09_P013556	euchromatic gene	0	0	0	0	0	0	1	0	0	0	0	0	0	0	0	0
A_09_P013561	euchromatic gene	0	0	0	0	0	0	0	0	0	0	0	0	0	0	0	0
A_09_P013566	euchromatic gene	0	0	0	0	0	0	0	0	0	0	0	0	0	0	0	0
A_09_P013571	euchromatic gene	0	0	0	0	0	0	0	0	0	0	0	0	0	0	0	0
A_09_P013576	euchromatic gene	0	0	0	0	0	0	0	0	0	0	0	0	0	0	0	0
A_09_P013581	euchromatic gene	0	0	0	0	0	0	0	0	0	0	0	0	0	0	0	0
A_09_P013586	euchromatic gene	0.5	0	0	0	0	0	0	0	0	0	0	0	0	0	0	0
A_09_P013591	euchromatic gene	0	0	0	0	0	0	0	0	0	0	0	0	0	0	0	0
A_09_P013596	euchromatic gene	0	0	0	0	0	0	0	0	0	0	0	0	0	0	0	0
A_09_P013601	euchromatic gene	0	0	0	0	0	0	0	0	0	0	0	0	0	0	0	0
A_09_P013606	euchromatic gene	0	0	0	0	0	0	0	0	0	0	0	0	0	0	0	0
A_09_P013611	euchromatic gene	0	0	0	0	0	0	0	0	0	0	0	0	0	0	0	0
A_09_P013616	euchromatic gene	0	0	0	0	0	0	0	0	0	0	0	0	0	0	0	0
A_09_P013621	euchromatic gene	0.5	0	0	0	0	0	0	0	0	0	0	0	0	0	0	0
A_09_P013626	euchromatic gene	0	0	0	0	0	0	0	0	0	0	0	0	0	0	0	0
A_09_P013631	euchromatic gene	0	0	0	1	0	0	1	0	0	0	0	0	0	0	0	0
A_09_P013636	euchromatic gene	0	0	0	0	0	0	0	0	0	0	0	0	0	0	0	0
A_09_P013641	euchromatic gene	0	0	0	0	0	0	0	0	0	0	0	0	0	0	0	0
A_09_P013646	euchromatic gene	0	0	0	0	0	0	0	0	0	0	0	0	0	0	0	0
A_09_P013656	euchromatic gene	0	0	0	0	0	0	0	0	0	0	0	0	0	0	0	0
A_09_P013661	euchromatic gene	0	0	0	0	0	0	0	0	0	0	0	0	0	0	0	0
A_09_P013666	euchromatic gene	0	0	0	0	0	0	0	0	0	0	0	0	0	0	0	0
A_09_P013671	euchromatic gene	0	0	0	0	0	0	0	0	0	0	0	0	0	0	0	0
A_09_P013676	euchromatic gene	0	0	0	0	0	0	0	0	0	0	0	0	0	0	0	0
A_09_P013681	euchromatic gene	0	0	0	0	0	0	0	0	0	0	0	0	0	0	0	0
A_09_P013686	euchromatic gene	0	0	0	0	0	0	0	0	0	0	0	0	0	0	0	0
A_09_P013691	euchromatic gene	0	0	0	0	0	0	0	0	0	0	0	0	0	0	0	0
A_09_P013696	euchromatic gene	0	0	0	0	0	0	0	0	0	0	0	0	0	0	0	0
A_09_P013701	euchromatic gene	0	0	0	0	0	0	0	0	0	0	0	0	0	0	0	0
A_09_P013706	euchromatic gene	0	0	0	0	0	0	0	0	0	0	0	0	0	0	0	0
A_09_P013711	euchromatic gene	0	0	0	0	0	0	0	0	0	0	0	0	0	0	0	0
A_09_P013716	euchromatic gene	0	0	0	0	0	0	0	0	0	0	0	0	0	0	0	0
A_09_P013721	euchromatic gene	0	0	0	1	0	0	0	0	0	0	0	0	0	0	0	0
A_09_P013726	euchromatic gene	0	0	0	0	0	0	0	0	0	0	0	0	0	0	0	0
A_09_P013731	euchromatic gene	0	0	0	11	0	0	0	0	0	0	0	0	0	0	0	0
A_09_P013736	euchromatic gene	0	0	0	0	0	0	0	0	0	0	0	0	0	0	0	0
A_09_P013741	euchromatic gene	0	0	0	0	0	0	0	0	0	0	0	0	0	0	0	0
A_09_P013746	euchromatic gene	0	0	0	0	0	0	1	0	0	0	0	0	0	0	0	0
A_09_P013751	euchromatic gene	0	0	0	0	0	0	0	0	0	0	0	0	0	0	0	0
A_09_P013756	euchromatic gene	0	0	0	0	0	0	0	0	0	0	0	0	0	0	0	0
A_09_P013761	euchromatic gene	0	0	0	0	0	0	0	0	0	0	0	0	0	0	0	0
A_09_P013766	euchromatic gene	0	0	0	0	0	0	0	0	0	0	0	0	0	0	0	0
A_09_P013771	euchromatic gene	0	0	0	0	0	0	0	0	0	0	0	0	0	0	0	0
A_09_P013776	euchromatic gene	0	0	0	0	0	0	0	0	0	0	0	0	0	0	0	0
A_09_P013781	euchromatic gene	0	0	0	0	0	0	0	0	0	0	0	0	0	0	0	0
A_09_P013786	euchromatic gene	0	0	0	0	0	0	0	0	0	0	0	0	0	0	0	0
A_09_P013791	euchromatic gene	0	0	0	0	0	0	0	0	0	0	0	0	0	0	0	0
A_09_P013806	euchromatic gene	0	0	0	0	0	0	0	0	0	0	0	0	0	0	0	0
A_09_P013811	euchromatic gene	0	0	0	0	0	0	0	0	0	0	0	0	0	0	0	0
A_09_P013816	euchromatic gene	0	0	0	0	0	0	0	0	0	0	0	0	0	0	0	0
A_09_P013821	euchromatic gene	0	0	0	0	0	0	0	0	0	0	0	0	0	0	0	0
A_09_P013826	euchromatic gene	0	0	0	0	0	0	0	0	0	0	0	0	0	0	0	0
A_09_P013831	euchromatic gene	0	0	0	1	0	0	0	0	0	0	0	0	0	0	0	0
A_09_P013836	euchromatic gene	0	0	0	0	0	0	0	0	0	0	0	0	0	0	0	0
A_09_P013841	euchromatic gene	0	0	0	0	0	0	0	0	0	0	0	0	0	0	0	0
A_09_P013846	euchromatic gene	0	0	0	0	0	0	0	0	0	0	0	0	0	0	0	0
A_09_P013851	euchromatic gene	0	0	0	0	0	0	0	0	0	0	0	0	0	0	0	0
A_09_P013856	euchromatic gene	0	0	0	0	0	0	0	0	0	0	0	0	0	0	0	0
A_09_P013861	euchromatic gene	0	0	0	0	0	0	0	0	0	0	0	0	0	0	0	0
A_09_P013866	euchromatic gene	0	0	0	0	0	0	0	0	2	0.5	2.5	0	0	0	0	0
A_09_P013871	euchromatic gene	0	0	0	0	0	0	0	0	0	0	0	0	0	0	0	0
A_09_P013876	euchromatic gene	0	0	0	0	0	0	0	0	0	0	0	0	0	0	0	0
A_09_P013886	euchromatic gene	0	0	0	0	0	0	0	0	0	0	0	0	0	0	0	0
A_09_P013891	euchromatic gene	0	0	0	0	0	0	0	0	0	0	0	0	0	0	0	0
A_09_P013896	euchromatic gene	0	0	0	0	0	0	0	0	0	0	0	1	0	0	0	0
A_09_P013901	euchromatic gene	0	0	0	0	0	0	0	0	0	0	0	0	0	0	0	0
A_09_P013906	euchromatic gene	0	0	0	0	0	0	0	0	0	0	0	0	0	0	0	0
A_09_P013911	euchromatic gene	0	0	0	0	0	0	0	0	0	0	0	0	0	0	0	0
A_09_P013916	euchromatic gene	0	0	0	0	0	0	0	0	0	0	0	0	0	0	0	0
A_09_P013921	euchromatic gene	0	0	0	0	0	0	0	0	0	0	0	0	0	0	0	0
A_09_P013926	euchromatic gene	0	0	0	0	0	0	0	0	0	0	0	0	0	0	0	0
A_09_P013931	euchromatic gene	0	0	0	0	0	0	0	0	0	0	0	0	0	0	0	0
A_09_P013936	euchromatic gene	0	0	0	0	0	0	0	0	0	0	0	0	0	0	0	0
A_09_P013941	euchromatic gene	0	0	0	0	0	0	0	0	0	0	0	0	0	0	0	0
A_09_P013946	euchromatic gene	0	0	0	0	0	0	0	0	0	0	0	0	0	0	0	0
A_09_P013951	euchromatic gene	0	0	0	0	0	0	0	0	0	0	0	0	0	0	0	0
A_09_P013956	euchromatic gene	0	0	0	1	0	0	0	0	0	0	0	0	0	0	0	0
A_09_P013961	euchromatic gene	0	0	0	0	0	0	0	0	0	0	0	0	0	0	0	0
A_09_P013981	euchromatic gene	0	0	0	0	0	0	0	0	0	0	0	0	0	0	0	0
A_09_P013986	euchromatic gene	0	0	0	0	0	0	0	0	0	0	0	0	0	0	0	0
A_09_P013991	euchromatic gene	0	0	0	0	0	0	0	0	0	0	0	0	0	0	0	0
A_09_P013996	euchromatic gene	0	0	0	0	0	0	0	0	0	0	0	0	0	0	0	0
A_09_P014001	euchromatic gene	0	0	0	0	0	0	0	0	0	0	0	0	0	0	0	0
A_09_P014006	euchromatic gene	0	0	0	0	0	0	0	0	0	0	0	0	0	0	0	0
A_09_P014011	euchromatic gene	0	0	0	0	0	0	0	0	0	0	0	0	0	0	1	0
A_09_P014016	euchromatic gene	0	0	0	0	0	0	0	0	0	0	0	0	0	0	0	0
A_09_P014026	euchromatic gene	0	0	0	0	0	0	0	0	0	0	0	0	0	0	0	0
A_09_P014031	euchromatic gene	0	0	0	0	0	0	0	0	0	0	0	0	0	0	0	0
A_09_P014036	euchromatic gene	0	0	0	0	0	0	0	0	0	0	0	0	0	0	0	0
A_09_P014041	euchromatic gene	0	0	0	0	0	0	0	0	0	0	0	0	0	0	0	0
A_09_P014046	euchromatic gene	0	0	0	0	0	0	0	0	0.5	0	3	0	0	0	0	0
A_09_P014051	euchromatic gene	0	0	0	0	0	0	0	0	0	0	0	0	0	0	0	0
A_09_P014056	euchromatic gene	0	0	0	0	0	0	0	0	0	0	0	0	0	0	0	0
A_09_P014061	euchromatic gene	0	0	0	0	0	0	0	0	0	0	0	0	0	0	0	0
A_09_P014071	euchromatic gene	0	0	0	0	0	0	0	0	0	0	0	0	0	0	0	0
A_09_P014076	euchromatic gene	0	0	0	0	0	0	0	0	0	0	0	0	0	0	0	0
A_09_P014081	euchromatic gene	0	0	0	0	0	0	0	0	0	0	0	0	0	0	0	0
A_09_P014091	euchromatic gene	0	0	0	0	0	0	0	0	0	0	0	0	0	0	0	0
A_09_P014096	euchromatic gene	0	0	0	0	0	0	0	0	0	0	0	0	0	0	0	0
A_09_P014101	euchromatic gene	0.5	0	0	0	0	0	0	0	0	0	0	0	0	0	0	0
A_09_P014106	euchromatic gene	0	0	0	0	0	0	0	0	0	0	0	0	0	0	0	0
A_09_P014111	euchromatic gene	0	0	0	0	0	0	0	0	0	0	0	0	0	0	0	0
A_09_P014116	euchromatic gene	0	0	0	0	0	0	0	0	0	0	0	0	0	0	0	0
A_09_P014121	euchromatic gene	0	0	0	0	0	0	0	0	0	0	0	0	0	0	0	0
A_09_P014126	euchromatic gene	0	0	0	0	0	0	0	0	0	0	0	0	0	0	0	0
A_09_P014131	euchromatic gene	0	0	0	0	0	0	0	0	0	0	0	0	0	0	0	0
A_09_P014136	euchromatic gene	0	0	0	0	0	0	0	0	0	0	0	0	0	0	0	0
A_09_P014141	euchromatic gene	0	0	0	0	0	0	0	0	0	0	0	0	0	0	0	0
A_09_P014146	euchromatic gene	0	0.5	0	0	0	0	0	0	0	0	0	0	0	0	0	0
A_09_P014151	euchromatic gene	0	0	0	0	0	0	0	0	0	0	0	0	0	0	0	0
A_09_P014156	euchromatic gene	0	0	0	1	0	0	0	0	0	0	0	0	0	0	0	0
A_09_P014161	euchromatic gene	0	0	0	0	0	0	0	0	0	0	0	0	0	0	0	0
A_09_P014166	euchromatic gene	0	0	0	0	0	0	0	0	0	0	0	0	0	0	0	0
A_09_P014176	euchromatic gene	0	0	0	0	0	0	0	0	0	0	0	0	0	0	0	0
A_09_P014181	euchromatic gene	0	0	0	0	0	0	0	0	0	0	0	0	0	0	0	0
A_09_P014186	euchromatic gene	0	0	0	0	0	0	0	0	0	0	0	0	0	0	0	0
A_09_P014191	euchromatic gene	0	0	0	0	0	0	0	0	0	0	0	0	0	0	0	0
A_09_P014196	euchromatic gene	0	0	0	0	0	0	0	0	0	0	0	0	0	0	0	0
A_09_P014201	euchromatic gene	0	0	0	0	0	0	0	0	0	0	0	0	0	0	0	0
A_09_P014206	euchromatic gene	0	0	0	0	0	0	0	0	0	0	0	0	0	0	0	0
A_09_P014211	euchromatic gene	0	1	0	0	0	0	0	0	0	0	0	0	0	0	0	0
A_09_P014216	euchromatic gene	0	0	0	0	0	0	0	0	0	0	0	0	0	0	0	0
A_09_P014221	euchromatic gene	0	0	0	1	0	0	0	1	0	0	0	0	0	0	0	0
A_09_P014226	euchromatic gene	0	0	0	0	0	0	0	0	0	0	0	0	0	0	0	0
A_09_P014231	euchromatic gene	0	0	0	0	0	0	0	0	0	0	0	0	0	0	0	0
A_09_P014241	euchromatic gene	0	0	0	0	0	0	0	0	0	0	0	0	0	0	0	0
A_09_P015631	euchromatic gene	0	0	0	0	0	0	0	0	0	0	0	0	0	0	0	0
A_09_P016556	euchromatic gene	0	0	0	0	0	0	1	0	0	0	0	0	0	0	0	0
A_09_P016561	euchromatic gene	0	0	0	0	0	0	0	0	0	0	0	0	0	0	0	0
A_09_P016566	euchromatic gene	0	0	0	1	0	0	0	0	0	0	0	0	0	0	0	0
A_09_P016646	euchromatic gene	0	0	0	0	0	0	0	0	0	0	0	0	0	0	0	0
A_09_P016651	euchromatic gene	0	0	0	1	0	0	0	0	0	0	0	0	0	0	0	0
A_09_P016656	euchromatic gene	0	0	0	0	0	0	0	0	0	0	0	0	0	0	0	0
A_09_P016661	euchromatic gene	0	0	0	0	0	0	0	0	0	0	0	0	0	0	0	0
A_09_P016666	euchromatic gene	0	0	0	0	0	0	0	0	0	0	0	0	0	0	0	0
A_09_P016671	euchromatic gene	0	0	0	0	0	0	0	0	0	0	0	0	0	0	0	0
A_09_P016676	euchromatic gene	0	0	0	0	0	0	0	0	0	0	0	0	0	0	0	0
A_09_P016681	euchromatic gene	0	0	0	0	0	0	0	0	0	0	0	0	0	0	0	0
A_09_P016686	euchromatic gene	0	0	0	0	0	0	0	0	0	0	0	0	0	0	0	0
A_09_P016691	euchromatic gene	0	0	0	0	0	0	0	0	0	0	0	0	0	0	0	0
A_09_P016696	euchromatic gene	0	0	0	0	0	0	0	0	0	0	0	0	0	0	0	0
A_09_P016851	euchromatic gene	0	0	0	0	1	0	0	0	0	0	0	0	0	0	0	0
A_09_P016856	euchromatic gene	0	0	0	0	0	0	0	0	0	0	0	0	0	0	0	0
A_09_P016861	euchromatic gene	0	0	0	0	0	0	0	0	0	0	0	0	0	0	0	0
A_09_P016866	euchromatic gene	0	0	0	0	0	0	0	0	0	0	0	0	0	0	0	0
A_09_P016871	euchromatic gene	0	0	0	0	0	0	0	0	0	0	0	0	0	0	0	0
A_09_P016876	euchromatic gene	0	0	0	0	0	0	0	0	0	0	0	0	0	0	0	0
A_09_P016886	euchromatic gene	0	0	0	0	0	0	0	0	0	0	0	0	0	0	0	0
A_09_P016891	euchromatic gene	0	0	0	0	0	0	1	0	0	0	0	0	0	0	0	0
A_09_P016896	euchromatic gene	0	0	0	0	0	0	0	0	0	0	0	0	0	0	0	0
A_09_P016901	euchromatic gene	0	0	0	0	0	0	0	0	0	0	0	0	0	0	0	0
A_09_P017071	euchromatic gene	0	0	0	0	0	0	0	0	0	0	0	0	0	0	0	0
A_09_P017076	euchromatic gene	0	0	0	0	0	0	0	0	0	0	0	0	0	0	0	0
A_09_P017391	euchromatic gene	0	0	0	0	0	0	0	0	0	0	0	0	0	0	0	0
A_09_P017396	euchromatic gene	0	0	0	0	0	0	0	0	0	0	0	0	0	0	0	0
A_09_P017456	euchromatic gene	0	0	0	0	0	0	0	0	0	0	0	0	0	0	0	0
A_09_P017461	euchromatic gene	0	0	0	0	0	0	0	0	0	0	0	0	0	0	0	0
A_09_P017466	euchromatic gene	0	0	0	0	0	0	0	0	0	0	0	0	0	0	0	0
A_09_P017471	euchromatic gene	0	0	0	0	0	0	0	0	0	0	0	0	0	0	0	0
A_09_P017476	euchromatic gene	0	0	0	0	0	0	0	0	0	0	0	0	0	0	0	0
A_09_P017481	euchromatic gene	0	0	0	0	0	0	0	0	0	0	0	0	0	0	0	0
A_09_P017486	euchromatic gene	0	0	0	0	0	0	0	0	0	0	0	0	0	0	0	0
A_09_P017491	euchromatic gene	0	0	0	1	2	0	0	0	0	0	0	0	0	0	0	0
A_09_P017496	euchromatic gene	0	0	0	0	0	0	0	0	0	0	0	0	0	0	0	0
A_09_P017501	euchromatic gene	0	0	0	0	0	0	0	0	0	0	0	0	0	0	0	0
A_09_P017506	euchromatic gene	0	0	0	0	0	0	0	0	0	0	0	0	0	0	0	0
A_09_P017511	euchromatic gene	0	0	0	0	0	0	0	0	0	0	0	0	0	0	0	0
A_09_P017516	euchromatic gene	0	0	0	0	0	0	0	0	0	0	0	0	0	0	0	0
A_09_P017691	euchromatic gene	0	0	0	0	0	0	0	0	0	0	0	0	0	0	0	0
A_09_P017782	euchromatic gene	0	0	0.5	0	0	0	0	0	0	0	0	0	0	0	0	0
A_09_P017786	euchromatic gene	0	0	0	0	0	0	0	0	0	0	0	0	0	0	0	0
A_09_P017791	euchromatic gene	0	0	0	0	0	0	0	0	0	0	0	0	0	0	0	0
A_09_P017796	euchromatic gene	0	0	0	0	0	0	0	0	0	0	0	0	0	0	0	0
A_09_P017801	euchromatic gene	0	0	0	0	0	0	0	0	0	0	0	0	0	0	0	0
A_09_P017806	euchromatic gene	0	0	0	0	0	0	0	0	0	0	0	0	0	0	0	0
A_09_P017811	euchromatic gene	0	0	0	0	0	0	0	0	0	0	0	0	0	0	0	0
A_09_P017816	euchromatic gene	0	0	0	0	0	0	0	0	0	0	0	0	0	0	0	0
A_09_P017821	euchromatic gene	0	0	0	1	0	0	0	0	0	0	0	0	0	0	0	0
A_09_P017826	euchromatic gene	0	0	0	0	0	0	0	0	0	0	0	0	0	0	0	0
A_09_P017831	euchromatic gene	0	0	0	0	0	0	0	0	0	0	0	0	0	0	0	0
A_09_P017836	euchromatic gene	0	0	0	0	0	0	0	0	0	0	0	0	0	0	0	0
A_09_P017841	euchromatic gene	1	0	0	0	3	0	0	0	0	0	0	0	0	0	0	0
A_09_P017846	euchromatic gene	0	0	0	0	0	0	0	0	0	0	0	0	0	0	0	0
A_09_P017851	euchromatic gene	0	0	0	0	0	0	0	0	0	0	0	0	0	0	0	0
A_09_P017856	euchromatic gene	0	0	0	0	0	0	0	0	0	0	0	0	0	0	0	0
A_09_P017861	euchromatic gene	0	0	0	0	0	0	0	0	0	0	0	0	0	0	0	0
A_09_P017866	euchromatic gene	0	0	0	0	0	0	0	0	0	0	0	0	0	0	0	0
A_09_P017871	euchromatic gene	0	0	0	0	0	0	0	0	0	0	0	0	0	0	0	0
A_09_P017876	euchromatic gene	0	0	0	0	0	0	0	0	0	0	0	0	0	0	0	0
A_09_P017881	euchromatic gene	0	0	0	0	0	0	0	0	0	0	0	0	0	0	0	0
A_09_P017886	euchromatic gene	0	0	0	0	0	0	0	0	0	0	0	0	0	0	0	0
A_09_P017891	euchromatic gene	0	0	0	0	0	0	0	0	0	0	0	0	0	0	0	0
A_09_P017896	euchromatic gene	0	1	3.5	0	0	0	0	0	0	0	0	0	0	0	0	0
A_09_P017901	euchromatic gene	0	0	0	0	0	0	0	0	0	0	0	0	0	0	0	0
A_09_P017906	euchromatic gene	0	0	0	0	0	0	0	0	0	0	0	0	0	0	0	0
A_09_P017911	euchromatic gene	0	0	0	0	0	0	0	0	0	0	0	0	0	0	0	0
A_09_P017916	euchromatic gene	0	0	0	0	0	0	0	0	0	0	0	0	0	0	0	0
A_09_P017921	euchromatic gene	0	0	0	1	0	0	0	0	0	0	0	0	0	0	0	0
A_09_P017926	euchromatic gene	0	0	0	0	10	0	0	0	0	0	0	0	0	0	0	0
A_09_P017931	euchromatic gene	0	0	0	0	0	0	0	0	0	0	0	0	0	0	0	0
A_09_P017936	euchromatic gene	1	0	0	0	0	0	0	0	0	0	0	0	0	0	0	0
A_09_P017941	euchromatic gene	0	0	0	0	0	0	0	0	0	0	0	0	0	0	0	0
A_09_P017946	euchromatic gene	0	0	0	0	0	0	0	0	0	0	0	0	0	0	0	0
A_09_P017951	euchromatic gene	0	0	0	0	0	0	0	0	0	0	0	0	0	0	0	0
A_09_P017966	euchromatic gene	0	0	0	0	0	0	0	0	0	0	0	0	0	0	0	0
A_09_P017971	euchromatic gene	0	0	0	0	0	0	0	0	0	0	0	0	0	0	0	0
A_09_P017976	euchromatic gene	0	0	0	0	0	0	0	0	0	0	0	0	0	0	0	0
A_09_P017981	euchromatic gene	0	0	0	0	0	0	0	0	0	0	0	0	0	0	0	0
A_09_P017986	euchromatic gene	0	0	0	0	0	0	0	0	0	0	0	0	0	0	0	0
A_09_P017991	euchromatic gene	0	0	0	0	0	0	0	0	0	0	0	0	0	0	0	0
A_09_P017996	euchromatic gene	0	0	0	0	0	0	0	0	0	0	0	0	0	0	0	0
A_09_P018001	euchromatic gene	0	0	0	0	0	0	0	0	0	0	0	0	0	0	0	0
A_09_P018006	euchromatic gene	0	0	0	0	0	0	0	0	0	0	0	0	0	0	0	0
A_09_P018011	euchromatic gene	0	0	0	0	0	0	0	0	0	0	0	0	0	0	0	0
A_09_P018016	euchromatic gene	0	0	0	0	0	0	0	0	0	0	0	0	0	0	0	0
A_09_P018021	euchromatic gene	0	0	0	0	0	0	0	0	0	0	0	0	0	0	0	0
A_09_P018026	euchromatic gene	0	0	0	0	0	0	0	0	0	0	0	0	0	0	0	0
A_09_P018031	euchromatic gene	0	0	0	0	0	0	0	0	0	0	0	0	0	0	0	0
A_09_P018036	euchromatic gene	0	0	0	0	0	0	0	0	0	0	0	0	0	0	0	0
A_09_P018041	euchromatic gene	0	0	0	0	0	0	0	0	0	0	0	0	0	0	0	0
A_09_P018046	euchromatic gene	0	0	0	0	0	0	0	0	0	0	0	0	0	0	0	0
A_09_P018051	euchromatic gene	0	0	0	0	0	0	0	0	0	0	0	0	0	0	0	0
A_09_P018056	euchromatic gene	0	0	0	0	0	0	0	0	0	0	0	0	0	0	0	0
A_09_P018061	euchromatic gene	0	0	0	0	0	0	0	0	0	0	0	1	0	0	0	0
A_09_P018066	euchromatic gene	0	0	0	0	0	0	0	0	0	0	0	0	0	0	0	0
A_09_P018071	euchromatic gene	0	0	0	0	0	0	0	0	0	0	0	0	0	0	0	0
A_09_P018076	euchromatic gene	0	0	0	1	1	0	0	0	0	0	0	0	0	0	0	0
A_09_P018081	euchromatic gene	0	0	0	0	0	0	0	0	0	0	0	0	0	0	0	0
A_09_P018086	euchromatic gene	0	0	0	0	0	0	0	0	0	0	0	0	0	0	0	0
A_09_P018091	euchromatic gene	0	0	0	0	0	0	0	0	0	0	0	0	0	0	0	0
A_09_P018096	euchromatic gene	0	0	0	0	0	0	0	0	0	0	0	0	0	0	0	0
A_09_P018101	euchromatic gene	0	0	0	0	0	0	0	0	0	0	0	0	0	0	0	0
A_09_P018106	euchromatic gene	2.5	0	0	0	0	0	0	0	0	0	0	0	0	0	0	0
A_09_P018111	euchromatic gene	0	0	0	0	0	0	0	0	0	0	0	0	0	0	0	0
A_09_P018116	euchromatic gene	0	0	0	0	0	0	0	0	0	0	0	0	0	0	0	0
A_09_P018121	euchromatic gene	0	0	0	0	0	0	0	0	0	0	0	0	0	0	0	0
A_09_P018126	euchromatic gene	0	0	0	0	0	0	0	0	0	0	0	0	0	0	0	0
A_09_P018131	euchromatic gene	0	0	0	2	0	0	0	0	0	0	0	0	0	0	0	0
A_09_P018136	euchromatic gene	0	0	0	0	0	0	0	0	0	0	0	0	0	0	0	0
A_09_P018141	euchromatic gene	0	0	0	0	0	0	0	0	0	0	0	0	0	0	0	0
A_09_P018146	euchromatic gene	0	0	0	0	0	0	0	0	0	0	0	0	0	0	0	0
A_09_P018151	euchromatic gene	0	0	0	0	0	0	0	0	0	0	0	0	0	0	0	0
A_09_P018156	euchromatic gene	0	0	0	0	0	0	0	0	0	0	0	0	0	0	0	0
A_09_P018161	euchromatic gene	0	0	0	1	0	0	0	0	0	0	0	0	0	0	0	0
A_09_P018166	euchromatic gene	0	0	0	0	0	0	0	0	0	0	0	0	0	0	0	0
A_09_P018171	euchromatic gene	0	0	0	1	0	0	0	0	0	0	0	0	0	0	0	0
A_09_P018176	euchromatic gene	0	0	0	0	0	0	0	0	0	0	0	0	0	0	0	0
A_09_P018181	euchromatic gene	0	0	0	0	0	0	0	0	0	0	0	0	0	0	0	0
A_09_P018186	euchromatic gene	0	0	0	0	0	0	0	0	0	0	0	0	0	0	0	0
A_09_P018191	euchromatic gene	0	0	0	0	0	0	0	0	0	0	0	0	0	0	0	0
A_09_P018196	euchromatic gene	0	0	0	0	0	0	0	0	0	0	0	0	0	0	0	0
A_09_P018201	euchromatic gene	0	0	0	0	0	0	0	0	0	0	0	0	0	0	0	0
A_09_P018206	euchromatic gene	0	0	0	0	0	0	0	0	0	0	0	0	0	0	0	0
A_09_P018211	euchromatic gene	0	0	0	0	0	0	0	0	0	0	0	0	0	0	0	0
A_09_P018216	euchromatic gene	0	0	0	0	0	0	0	0	0	0	0	0	0	0	0	0
A_09_P018221	euchromatic gene	0	0	0	0	0	0	0	0	0	0	0	0	0	0	0	0
A_09_P018226	euchromatic gene	0	0	0	0	0	0	0	0	0	0	0	0	0	0	0	0
A_09_P018231	euchromatic gene	0	0	0	0	0	0	0	0	0	0	0	0	0	0	0	0
A_09_P018236	euchromatic gene	0	0	0	0	0	0	0	0	0	0	0	0	0	0	0	0
A_09_P018241	euchromatic gene	0	0	0	0	0	0	0	0	0	0	0	0	0	0	0	0
A_09_P018246	euchromatic gene	0	0	0	0	0	0	0	0	0	0	0	0	0	0	0	0
A_09_P018251	euchromatic gene	0	0	0	0	0	0	0	0	0	0	0	0	0	0	0	0
A_09_P018256	euchromatic gene	0	0	0	0	0	0	0	0	0	0	0	0	0	0	0	0
A_09_P018261	euchromatic gene	0	0	0	1	0	0	0	0	0	0	0	0	0	0	0	0
A_09_P018266	euchromatic gene	0	0	0	0	0	0	0	0	0	0	0	0	0	0	0	0
A_09_P018271	euchromatic gene	0	0	0	0	0	0	0	0	0	0	0	0	0	0	0	0
A_09_P018276	euchromatic gene	0	0	0	0	0	0	0	0	0	0	0	0	0	0	0	0
A_09_P018281	euchromatic gene	0	0	0	0	0	0	0	0	0	0	0	0	0	0	0	0
A_09_P018286	euchromatic gene	0	0	0	0	0	0	0	0	0	0	0	0	0	0	0	0
A_09_P018291	euchromatic gene	0	0	0	0	0	0	0	0	0	0	0	0	0	0	0	0
A_09_P018296	euchromatic gene	0	0	0	0	0	0	0	0	0	0	0	0	0	0	0	0
A_09_P018306	euchromatic gene	0	0	0	0	0	0	0	0	0	0	0	0	0	0	0	0
A_09_P018311	euchromatic gene	0	0	0	0	0	0	0	0	0	0	0	0	0	0	0	0
A_09_P018316	euchromatic gene	0	0	0	0	0	0	0	0	0	0	0	0	0	0	0	0
A_09_P018326	euchromatic gene	2	0	0	0	0	0	0	0	0.5	2.5	0	0	0	1	1	0
A_09_P018331	euchromatic gene	0	0	0	0	1	0	0	0	0	0	0	0	0	0	0	0
A_09_P018336	euchromatic gene	0	0	0.5	0	0	0	0	0	0	0	0	0	0	0	0	0
A_09_P018341	euchromatic gene	0	0	0	0	0	0	0	0	0	0	0	0	0	0	0	0
A_09_P018346	euchromatic gene	0	0	0	0	0	0	0	0	0	0	0	0	0	0	0	0
A_09_P018351	euchromatic gene	0	0	0	0	0	0	0	0	0	0	0	0	0	0	0	0
A_09_P018356	euchromatic gene	0	0	0	0	0	0	0	0	0	0	0	0	0	0	0	0
A_09_P018361	euchromatic gene	0	0	0	0	0	0	0	0	0	0	0	0	0	0	0	0
A_09_P018366	euchromatic gene	0	0	0	0	0	0	0	0	0	0	0	0	0	0	0	0
A_09_P018371	euchromatic gene	0	0	0	0	0	0	0	0	0	0	0	0	0	0	0	0
A_09_P018376	euchromatic gene	0	0	0	0	0	0	0	0	0	0	0	0	0	0	0	0
A_09_P018381	euchromatic gene	0	0	0	0	0	0	0	0	0	0	0	0	0	0	0	0
A_09_P018386	euchromatic gene	0	1.5	0	0	0	0	0	0	0	0	0	0	0	0	0	0
A_09_P018391	euchromatic gene	0	0	0	0	0	0	0	0	0	0	0	0	0	0	0	0
A_09_P018401	euchromatic gene	0	0	0	0	0	0	0	0	0	0	0	0	0	0	0	0
A_09_P018406	euchromatic gene	0.5	0	0	0	1	0	0	0	0	0	0	0	0	0	0	0
A_09_P018411	euchromatic gene	0	0	0	0	0	0	0	0	0	0	0	0	0	0	0	0
A_09_P018421	euchromatic gene	0	0	0	0	0	0	0	0	0	0	0	0	0	0	0	0
A_09_P018431	euchromatic gene	0	0	0	0	0	0	0	0	0	0	0	0	0	0	0	0
A_09_P018436	euchromatic gene	0	0	0	0	0	0	0	0	0	0	0	0	0	0	0	0
A_09_P018441	euchromatic gene	0	0	0	0	0	0	0	0	0	0	0	0	0	0	0	0
A_09_P018446	euchromatic gene	0	0	0	0	0	0	0	0	0	0	0	0	0	0	0	0
A_09_P018451	euchromatic gene	0	0	0	0	0	0	0	0	0	0	0	0	0	0	0	0
A_09_P018456	euchromatic gene	0	0	0	0	0	0	0	0	0	0	0	0	0	0	0	0
A_09_P018461	euchromatic gene	0	0	0	0	0	0	0	0	0	0	0	0	0	0	0	0
A_09_P018466	euchromatic gene	0	0	0	0	0	0	0	0	0	0	0	0	0	0	0	0
A_09_P018471	euchromatic gene	0	0	0	0	0	0	0	0	0	0	0	0	0	0	0	0
A_09_P018476	euchromatic gene	0	0	0	0	0	0	0	0	0	0	0	0	0	0	0	0
A_09_P018481	euchromatic gene	0	0	0	0	0	0	0	0	0	0	0	0	0	0	0	0
A_09_P018486	euchromatic gene	0	0	0	0	0	0	0	0	0	0	0	0	0	0	0	0
A_09_P018491	euchromatic gene	0	0	0	0	0	0	0	0	0	0	0	0	0	0	0	0
A_09_P018496	euchromatic gene	0	0	0	0	0	0	0	0	0	0	0	0	0	0	0	0
A_09_P018501	euchromatic gene	0	0	0	0	0	0	0	0	0	0	0	0	0	0	0	0
A_09_P018506	euchromatic gene	0	0	0	1	0	0	0	0	0	0	0	0	0	0	0	0
A_09_P018511	euchromatic gene	0	0	0	0	0	0	0	0	0	0	0	0	0	0	0	0
A_09_P018516	euchromatic gene	0	0	0	0	0	0	0	0	0	0	0	0	0	0	0	0
A_09_P018521	euchromatic gene	0	0	0	0	0	0	0	0	0	0	0	0	0	0	0	0
A_09_P018526	euchromatic gene	0	0	0	0	0	0	0	0	0	0	0	0	0	0	0	0
A_09_P018531	euchromatic gene	0	0	0	0	0	0	0	0	0	0	0	0	0	0	0	0
A_09_P018536	euchromatic gene	0	0	0	0	0	0	0	0	0	0	0	0	0	0	0	0
A_09_P018541	euchromatic gene	0	0	0	0	0	0	0	0	0	0	0	0	0	0	0	0
A_09_P018546	euchromatic gene	0	0	0	0	0	0	0	0	0	0	0	0	0	0	0	0
A_09_P018551	euchromatic gene	0	0	0	0	0	0	0	0	0	0	0	0	0	0	0	0
A_09_P018556	euchromatic gene	0	0	0	0	0	0	0	0	0	0	0	0	0	0	0	0
A_09_P018561	euchromatic gene	0	0	0	0	0	0	0	0	0	0	0	0	0	0	0	0
A_09_P018571	euchromatic gene	0	0	0	0	0	0	0	0	0	0	0	0	0	0	0	0
A_09_P018576	euchromatic gene	0	0	0	0	0	0	0	0	0	0	0	0	0	0	0	0
A_09_P018581	euchromatic gene	0	0	0	0	0	0	0	0	0	0	0	0	0	0	0	0
A_09_P018586	euchromatic gene	0	0	0	1	0	0	0	0	0	0	0	0	0	0	0	0
A_09_P018591	euchromatic gene	0	0	0	0	0	0	0	0	0	0	0	0	0	0	0	0
A_09_P018596	euchromatic gene	0	0	0	0	0	0	0	0	0	0	0	0	0	0	0	0
A_09_P018601	euchromatic gene	0	0	0	0	0	0	0	0	0	0	0	0	0	0	0	0
A_09_P018606	euchromatic gene	2.5	0	0.5	0	4	0	1	0	0	0	0	0	0	0	0	0
A_09_P018611	euchromatic gene	0	0	0	0	0	0	0	0	0	0	0	0	0	0	0	0
A_09_P018616	euchromatic gene	0	0	0.5	0	0	0	0	0	0	0	0	0	0	0	0	0
A_09_P018621	euchromatic gene	0	0	0	0	0	0	0	0	0	0	0	0	0	0	0	0
A_09_P018626	euchromatic gene	0	0	0	0	0	0	0	0	0	0	0	0	0	0	0	0
A_09_P018631	euchromatic gene	0	0	0	0	0	0	0	0	0	0	0	0	0	0	0	0
A_09_P018636	euchromatic gene	0	0	0	0	0	0	0	0	0	0	0	0	0	0	0	0
A_09_P018641	euchromatic gene	0	0	0	0	0	0	0	0	0	0	0	0	0	0	0	0
A_09_P018646	euchromatic gene	0	0	0	0	0	0	0	0	0	0	0	0	0	0	0	0
A_09_P018651	euchromatic gene	0	0	0	1	0	0	1	0	0	0	0	0	0	0	0	0
A_09_P018656	euchromatic gene	0	0	0	0	0	0	0	0	0	0	0	0	0	0	0	0
A_09_P018661	euchromatic gene	0	0	0	0	0	0	0	0	0	0	0	0	0	0	0	0
A_09_P018666	euchromatic gene	0.5	0	0	2	3	1	1	0	0	0	0	1	4	0	1	0
A_09_P018671	euchromatic gene	0	0	0	1	0	0	0	0	0	0	0	0	0	0	0	0
A_09_P018676	euchromatic gene	0	0	0	0	0	0	0	0	0	0	0	0	0	0	0	0
A_09_P018681	euchromatic gene	0	0	0	0	0	0	0	0	0	0	0	0	0	0	0	0
A_09_P018686	euchromatic gene	0	0	0	0	0	0	0	0	0	0	0	0	0	0	0	0
A_09_P018691	euchromatic gene	0	0	0	0	0	0	0	0	0	0	0	0	0	0	0	0
A_09_P018696	euchromatic gene	0	0	0	0	0	0	0	0	0	0	0	0	0	0	0	0
A_09_P018701	euchromatic gene	0	0	0	0	0	0	0	0	0	0	0	0	0	0	0	0
A_09_P018706	euchromatic gene	0	0	0	0	0	0	0	0	0	0	0	0	0	0	0	0
A_09_P018711	euchromatic gene	0	0	0	0	0	0	0	0	0	0	0	0	0	0	0	0
A_09_P018716	euchromatic gene	0	0	0	0	0	0	0	0	0	0	0	0	0	0	0	0
A_09_P018721	euchromatic gene	0	0	0	0	0	0	0	0	0	0	0	0	0	0	0	0
A_09_P018726	euchromatic gene	0	0	0	0	0	0	0	0	0	0	0	0	0	0	0	0
A_09_P018731	euchromatic gene	0	0	0	0	0	0	0	0	0	0	0	0	0	0	0	0
A_09_P018736	euchromatic gene	0	0	0	0	0	0	0	0	0	0	0	0	0	0	0	0
A_09_P018741	euchromatic gene	0	0	0	0	0	0	0	0	0	0	0	0	0	0	0	0
A_09_P018746	euchromatic gene	0	0	0	0	0	0	0	0	0	0	0	0	0	0	0	0
A_09_P018751	euchromatic gene	0	0	0	0	0	0	0	0	0	0	0	0	0	0	0	0
A_09_P018756	euchromatic gene	0	0	0	0	0	0	0	0	0	0	0	0	0	0	0	0
A_09_P018761	euchromatic gene	0	0	0	0	0	0	0	0	0	0	0	0	0	0	0	0
A_09_P018766	euchromatic gene	0	0	3.5	0	0	0	0	0	0	0	0	0	0	0	0	0
A_09_P018771	euchromatic gene	0	0	0	0	0	0	0	0	0	0	0	0	0	0	0	0
A_09_P018776	euchromatic gene	0	0	0	0	0	0	0	0	0	0	0	0	0	0	0	0
A_09_P018781	euchromatic gene	0	0	0	0	0	0	0	0	0	0	0	0	0	0	0	0
A_09_P018786	euchromatic gene	0	0	0	0	0	0	0	0	0	0	0	0	0	0	0	0
A_09_P018791	euchromatic gene	0	0	0	0	0	0	0	0	0	0	0	0	0	0	0	0
A_09_P018796	euchromatic gene	0	0	0	0	0	0	0	0	0	0	0	0	0	0	0	0
A_09_P018801	euchromatic gene	0	0	0	0	0	0	0	0	0	0	0	0	0	0	0	0
A_09_P018806	euchromatic gene	0	0	0	0	0	0	0	0	0	0	0	0	0	0	0	0
A_09_P018811	euchromatic gene	0	0	0	0	0	0	0	0	0	0	0	0	0	0	0	0
A_09_P018816	euchromatic gene	0	0	0	0	0	0	0	0	0	0	0	0	0	0	0	0
A_09_P018821	euchromatic gene	0	0	0	0	0	0	0	0	0	0	0	0	0	0	0	0
A_09_P018826	euchromatic gene	0	0	0	0	0	0	0	0	15.5	0.5	1.5	33	18	2	6	0
A_09_P018831	euchromatic gene	0	0	0	0	0	0	0	0	0	0	0	0	0	0	0	0
A_09_P018836	euchromatic gene	0	0	0	0	0	0	0	0	0	0	0	0	0	0	0	0
A_09_P018841	euchromatic gene	0	0	0	0	0	0	0	0	0	0	0	0	0	0	0	0
A_09_P018846	euchromatic gene	0	0	0	0	0	0	0	0	0	0	0	0	0	0	0	0
A_09_P018851	euchromatic gene	0	0	0	0	0	0	1	0	0	0	0	0	0	0	0	0
A_09_P018856	euchromatic gene	0	0	0	0	1	0	0	0	0	0	0	0	0	0	0	0
A_09_P018861	euchromatic gene	0	0	0	0	0	0	0	0	0	0	0	0	0	0	0	0
A_09_P018866	euchromatic gene	0	0	0	0	0	0	0	0	0	0	0	0	0	0	0	0
A_09_P018871	euchromatic gene	0	0	0	0	0	0	0	0	0	0	0	0	0	0	0	0
A_09_P018876	euchromatic gene	0	0	0	0	0	0	0	0	0	0	0	0	0	0	0	0
A_09_P018881	euchromatic gene	0.5	0	0.5	0	1	0	2	0	0	0	0	0	0	0	0	0
A_09_P018891	euchromatic gene	0	0	0	1	1	0	0	0	0	0	0	0	0	0	0	0
A_09_P018896	euchromatic gene	0	0	0	0	0	0	0	0	0	0	0	0	0	0	0	0
A_09_P018901	euchromatic gene	0	0	0	0	0	0	0	0	0	0	0	0	0	0	0	0
A_09_P018906	euchromatic gene	0	0	0	0	0	0	0	0	0	0	0	0	0	0	0	0
A_09_P018911	euchromatic gene	0	0	0	0	0	0	0	0	0	0	0	0	0	0	0	0
A_09_P018916	euchromatic gene	0	0	0	0	0	0	0	0	0	0	0	0	0	0	0	0
A_09_P018921	euchromatic gene	0	0	0	0	0	0	0	0	0	0	0	0	0	0	0	0
A_09_P018926	euchromatic gene	0	0	0	0	0	0	0	0	0	0	0	0	0	0	0	0
A_09_P018931	euchromatic gene	0	0	0	0	0	0	0	0	0	0	0	0	0	0	0	0
A_09_P018936	euchromatic gene	0	0	0	0	0	0	0	0	0	0	0	0	0	0	0	0
A_09_P018941	euchromatic gene	0	0	0	0	0	0	0	0	0	0	0	0	0	0	0	0
A_09_P018946	euchromatic gene	0	0	0	0	0	0	0	0	0	0	0	0	0	0	0	0
A_09_P018951	euchromatic gene	0	0	0	0	0	0	0	0	0	0	0	0	0	0	0	0
A_09_P018956	euchromatic gene	0	0	0	0	0	0	0	0	0	0	0	0	0	0	0	0
A_09_P018961	euchromatic gene	0	0	0	0	0	0	0	0	0	0	0	0	0	0	0	0
A_09_P018966	euchromatic gene	0	0	0	0	0	0	0	0	0	0	0	0	0	0	0	0
A_09_P018971	euchromatic gene	0	0	0	0	0	0	0	0	0	0	0	0	0	0	0	0
A_09_P018976	euchromatic gene	0	0	0	0	0	0	0	0	0	0	0	0	0	0	1	0
A_09_P018981	euchromatic gene	0	0	0	0	0	0	0	0	0	0	0	0	0	0	0	0
A_09_P018986	euchromatic gene	0	0	0	0	0	0	0	0	0	0	0	0	0	0	0	0
A_09_P018991	euchromatic gene	0	0	0	0	0	0	0	0	0	0	0	0	0	0	0	0
A_09_P018996	euchromatic gene	0	0	0	0	0	0	0	0	0	0	0	0	0	0	0	0
A_09_P019001	euchromatic gene	0	0	0	0	0	0	0	0	0	0	0	0	0	0	0	0
A_09_P019006	euchromatic gene	0	0	0	0	0	0	0	0	0	0	0	0	0	0	0	0
A_09_P019011	euchromatic gene	0	0	0	0	0	0	0	0	0	0	0	0	0	0	0	0
A_09_P019016	euchromatic gene	0	0	0	0	0	0	0	0	0	0	0	0	0	0	0	0
A_09_P019021	euchromatic gene	0	0	0	0	0	0	0	0	0	0	0	0	0	0	0	0
A_09_P019026	euchromatic gene	0	0	0	0	0	0	0	0	0	0	0	0	0	0	0	0
A_09_P019031	euchromatic gene	0	0	0	0	0	0	0	0	0	2.5	0	0	0	0	0	0
A_09_P019036	euchromatic gene	0	0	0	0	0	0	0	0	0	0	0	0	0	0	0	0
A_09_P019041	euchromatic gene	0	0	0	0	0	0	0	0	0	0	0	0	0	0	0	0
A_09_P019051	euchromatic gene	0	0	0	1	0	1	0	0	0	0	0	0	0	0	0	0
A_09_P019056	euchromatic gene	0	0	0	0	0	0	0	0	0	0	0	0	0	0	0	0
A_09_P019061	euchromatic gene	0	0	0	0	0	0	0	0	0	0	0	0	0	0	0	0
A_09_P019066	euchromatic gene	0.5	0	0	0	0	0	0	0	0	0	0	0	0	0	0	0
A_09_P019071	euchromatic gene	0	0	0	0	0	0	0	0	0	0	0	0	0	0	0	0
A_09_P019076	euchromatic gene	0	0	0	0	0	0	0	0	0	0	0	0	0	0	0	0
A_09_P019081	euchromatic gene	0	0	0	0	0	0	0	0	0	0	0	0	0	0	0	0
A_09_P019086	euchromatic gene	0	0	0	0	0	0	0	0	0	0	0	0	0	0	0	0
A_09_P019096	euchromatic gene	0	0	0	0	0	0	0	0	0	0	0	0	0	0	0	0
A_09_P019101	euchromatic gene	0	0	0	0	0	0	0	0	0	0	0	0	0	0	0	0
A_09_P019106	euchromatic gene	0	0	0	0	0	0	0	0	0	0	0	0	0	0	0	0
A_09_P019111	euchromatic gene	0	0	0	0	0	0	0	0	0	0	0	0	0	0	0	0
A_09_P019116	euchromatic gene	0	0	0	0	1	0	0	0	0	0	0	0	0	0	0	0
A_09_P019121	euchromatic gene	0	0	0	0	0	0	0	0	0	0	0	0	0	0	0	0
A_09_P019126	euchromatic gene	0	0	0	0	0	0	0	0	0	0	0	0	0	0	0	0
A_09_P019131	euchromatic gene	0	0	0	0	0	0	0	0	0	0	0	0	0	0	0	0
A_09_P019136	euchromatic gene	0.5	1	0	0	0	0	2	0	0	0	0	0	0	0	0	0
A_09_P019141	euchromatic gene	0	0	0.5	1	0	0	0	0	0	0	0	0	0	0	0	0
A_09_P019146	euchromatic gene	0	0	0	0	0	0	0	0	0	0	0	0	0	0	0	0
A_09_P019151	euchromatic gene	0	0	0	0	0	0	0	0	0	0	0	0	0	0	0	0
A_09_P019156	euchromatic gene	0	0	0	0	0	0	0	0	0	0	0	0	0	0	0	0
A_09_P019161	euchromatic gene	0	0	0	0	0	0	0	0	0	0	0	2	0	0	0	0
A_09_P019166	euchromatic gene	0	0	0	0	0	0	0	0	0	0	0	0	0	0	0	0
A_09_P019171	euchromatic gene	0	0	0	0	0	0	0	0	0	0	0	0	0	0	0	0
A_09_P019176	euchromatic gene	0	0	0	0	0	0	0	0	0	0	0	0	0	0	0	0
A_09_P019181	euchromatic gene	0	0	0	0	0	0	0	0	0	0	0	0	0	0	0	0
A_09_P019186	euchromatic gene	0	0	0	0	0	0	0	0	0	0	0	0	0	0	0	0
A_09_P019191	euchromatic gene	0	0	0	0	0	0	0	0	0	0	0	0	0	0	0	0
A_09_P019196	euchromatic gene	0	0.5	0	0	0	0	0	0	0	0	0	0	0	0	0	0
A_09_P019201	euchromatic gene	0	0	0	0	0	0	0	0	0	0	0	0	0	0	0	0
A_09_P019206	euchromatic gene	0	0	0	0	0	0	0	0	0	0	0	0	0	0	0	0
A_09_P019211	euchromatic gene	0	0.5	0	1	0	0	0	0	0.5	0	1.5	1	0	0	0	0
A_09_P019216	euchromatic gene	0.5	0	1.5	1	0	0	0	0	0	0.5	0	1	0	0	0	0
A_09_P019221	euchromatic gene	0	0	0	0	0	0	0	0	0	0	0	0	0	0	0	0
A_09_P019226	euchromatic gene	0	0	0	0	0	0	0	0	0	0	0	0	0	0	0	0
A_09_P019231	euchromatic gene	0	0	0	0	0	0	0	0	0	0	0	0	0	0	0	0
A_09_P019236	euchromatic gene	0	0	0	0	0	0	0	0	0	0	0	0	0	0	0	0
A_09_P019241	euchromatic gene	0	0	0	0	0	0	0	0	0	0	0	0	0	0	0	0
A_09_P019246	euchromatic gene	0	0	0	0	0	0	0	0	0	0	0	0	0	0	0	0
A_09_P019251	euchromatic gene	0	0	0	0	0	0	0	0	0	0	0	0	0	0	0	0
A_09_P019256	euchromatic gene	0	0	0	0	0	0	0	0	0	0	0	0	0	0	0	0
A_09_P019261	euchromatic gene	0	0	0	0	0	0	0	0	0	0	0	0	0	0	0	0
A_09_P019266	euchromatic gene	0	0	0	0	0	0	0	0	0	0	0	0	0	0	0	0
A_09_P019271	euchromatic gene	0	0	0	0	0	0	0	0	0	0	0	0	0	0	0	0
A_09_P019276	euchromatic gene	0	0	0	0	0	0	0	0	0	0	0	0	0	0	0	0
A_09_P019281	euchromatic gene	0	0	0	0	0	0	0	0	0	0	0	0	0	0	0	0
A_09_P019286	euchromatic gene	0.5	0	0	0	0	0	0	0	0	0	0	0	0	0	0	0
A_09_P019291	euchromatic gene	0	0	0	0	0	0	0	0	0	0	0	0	0	0	0	0
A_09_P019296	euchromatic gene	0	0	0	0	0	0	0	0	0	0	0	0	0	0	0	0
A_09_P019301	euchromatic gene	0	0	0	0	0	0	0	0	0	0	0	0	0	0	0	0
A_09_P019311	euchromatic gene	0	0	0	0	2	0	0	0	0	0	0	0	0	0	0	0
A_09_P019316	euchromatic gene	0	0	0	0	0	0	0	0	0	0	0	1	0	0	0	0
A_09_P019321	euchromatic gene	0.5	0	0	0	1	0	0	0	0	0	0	0	0	0	0	0
A_09_P019326	euchromatic gene	0	0	0	1	0	0	0	0	0	0	0	0	0	0	0	0
A_09_P019331	euchromatic gene	0	0	0	0	0	0	0	0	0	0	0	1	0	0	0	0
A_09_P019336	euchromatic gene	0	0	0	0	0	0	0	0	0	0	0	0	0	0	0	0
A_09_P019341	euchromatic gene	0	0	0	0	0	0	0	0	0	0	0	0	0	0	0	0
A_09_P019346	euchromatic gene	0	0	0	0	0	0	0	0	0	0	0	0	0	0	0	0
A_09_P019351	euchromatic gene	0	0	0	0	0	0	0	0	0	0	0	0	0	0	0	0
A_09_P019356	euchromatic gene	0	0	0	0	0	0	0	0	0	0	0	0	0	0	0	0
A_09_P019361	euchromatic gene	0	0	0	0	0	0	0	0	0	0	0	0	0	0	0	0
A_09_P019366	euchromatic gene	0	0	0	0	0	0	0	0	0	0	0	0	0	0	0	0
A_09_P019371	euchromatic gene	0	0	0	0	0	0	0	0	0	0	0	0	0	0	0	0
A_09_P019376	euchromatic gene	0	0	1	0	0	1	0	0	0	0	0	0	0	0	0	0
A_09_P019381	euchromatic gene	2.5	0	0	4	2	0	1	0	0	0	0	0	0	0	0	0
A_09_P019386	euchromatic gene	2.5	0	0.5	8	7	0	0	0	0	0	0	0	0	0	0	0
A_09_P019391	euchromatic gene	0	0	0	0	0	0	0	0	0	0	0	0	0	0	0	0
A_09_P019396	euchromatic gene	0	0	0	0	0	0	0	0	0	0	0	0	0	0	0	0
A_09_P019401	euchromatic gene	0	0	0	0	0	0	0	0	0	0	0	0	0	0	0	0
A_09_P019406	euchromatic gene	0	0	0	0	0	0	0	0	0	0	0	0	0	0	0	0
A_09_P019411	euchromatic gene	0	0	0	0	0	0	0	0	0	0	0	0	0	0	0	0
A_09_P019416	euchromatic gene	0	0	0	0	0	0	0	0	0	0	0	0	0	0	0	0
A_09_P019421	euchromatic gene	0	0	0	0	0	0	0	0	0	0	0	0	0	0	0	0
A_09_P019426	euchromatic gene	0	1.5	0	0	0	0	0	0	0	0	0	0	0	0	0	0
A_09_P019431	euchromatic gene	0	0	0	0	0	0	0	0	0	0	0	0	0	0	0	0
A_09_P019436	euchromatic gene	0	0	0	0	0	0	0	0	0	0	0	0	0	0	0	0
A_09_P019441	euchromatic gene	0	0	0	0	0	0	0	0	0	0	0	0	0	0	0	0
A_09_P019446	euchromatic gene	0	0	0	0	0	0	0	0	0	0	0	0	0	0	0	0
A_09_P019451	euchromatic gene	0	0	0	0	0	0	0	0	0	0	0	0	0	0	0	0
A_09_P019456	euchromatic gene	0	0	0	0	0	0	0	0	0	0	0	0	0	0	0	0
A_09_P019461	euchromatic gene	0	0	0	0	1	0	0	0	0	0	0	0	0	0	0	0
A_09_P019466	euchromatic gene	0	0	0	0	0	0	0	0	0	0	0	1	0	0	0	0
A_09_P019471	euchromatic gene	0	0	0	0	0	0	0	0	0	0	0	0	0	0	0	0
A_09_P019476	euchromatic gene	0	1.5	0	0	0	0	0	0	0	0	0	0	0	0	0	0
A_09_P019481	euchromatic gene	0	0	0	0	0	0	1	0	0	0	0	0	0	0	0	0
A_09_P019486	euchromatic gene	0	0	0	0	2	0	0	0	0	0	0	0	0	0	0	0
A_09_P019491	euchromatic gene	0	0	0	0	0	0	0	0	0	0	0	0	0	0	0	0
A_09_P019496	euchromatic gene	0	0	0	0	0	0	0	0	0	0	0	0	0	0	0	0
A_09_P019501	euchromatic gene	0	0	0	0	0	0	0	0	0	0	0	0	0	0	0	0
A_09_P019506	euchromatic gene	0	0	0	0	0	0	0	0	0	0	0	0	0	0	0	0
A_09_P019511	euchromatic gene	0	0	0	0	0	0	0	0	0	0	0	0	0	0	0	0
A_09_P019516	euchromatic gene	0	0	0	0	0	0	0	0	0	0	0	0	0	0	0	0
A_09_P019521	euchromatic gene	0	0	0	0	0	0	0	0	0	0	0	0	0	0	0	0
A_09_P019526	euchromatic gene	0	0	0	0	0	0	0	0	0	0	0	0	0	0	0	0
A_09_P019531	euchromatic gene	0	0	0	0	0	0	0	0	0	0	0	0	0	0	0	0
A_09_P019536	euchromatic gene	0	0	0	0	0	0	0	0	0	0	0	0	0	0	0	0
A_09_P019541	euchromatic gene	0	0	0	0	0	0	0	0	0	0	0	0	0	0	0	0
A_09_P019546	euchromatic gene	0	0	0	0	0	0	0	0	0	0	0	0	0	0	0	0
A_09_P019551	euchromatic gene	0	0	0	0	0	0	0	0	0	0	0	0	0	0	0	0
A_09_P019556	euchromatic gene	0	0	0	0	0	0	0	0	0	0	0	0	0	0	0	0
A_09_P019561	euchromatic gene	0	0	0	0	0	1	0	0	0	0	0	0	0	0	0	0
A_09_P019566	euchromatic gene	0	0	0	0	0	0	0	0	0	0	0	0	0	0	0	0
A_09_P019571	euchromatic gene	0	0	0	0	0	0	0	0	0	0	0	0	0	0	0	0
A_09_P019576	euchromatic gene	0	0	0	0	0	0	0	0	0	0	0	0	0	0	0	0
A_09_P019581	euchromatic gene	0	0	0	1	0	0	1	0	0	0	0	0	0	0	0	0
A_09_P019586	euchromatic gene	0	0	0	0	0	0	0	0	0	0	0	0	0	0	0	0
A_09_P019591	euchromatic gene	0	0	0	0	0	0	0	0	0.5	0	0	0	0	0	0	0
A_09_P019596	euchromatic gene	0	0	0	0	0	0	0	0	0	0	0	0	0	0	0	0
A_09_P019601	euchromatic gene	0	0	0	0	0	0	0	0	0	0	0	0	0	0	0	0
A_09_P019606	euchromatic gene	0	0	0	0	0	0	0	0	0	0	0	0	0	0	0	0
A_09_P019611	euchromatic gene	0	0	0	0	0	0	0	0	0	0	0	0	0	0	0	0
A_09_P019616	euchromatic gene	0	0	0	0	0	0	0	0	0	0	0	0	0	0	0	0
A_09_P019621	euchromatic gene	0	0	0	0	0	0	0	0	0	0	0	0	0	0	0	0
A_09_P019626	euchromatic gene	0	0	0	0	0	0	0	0	0	0	0	0	0	0	0	0
A_09_P019631	euchromatic gene	0	0	0	0	0	0	0	0	0	0	0	0	0	0	0	0
A_09_P019636	euchromatic gene	0	0	0	0	0	0	0	0	0	0	0	0	0	0	0	0
A_09_P019641	euchromatic gene	0	0	0	0	0	0	0	0	0	0	0	0	0	0	0	0
A_09_P019646	euchromatic gene	0	0	0	0	0	0	0	0	0	0	0	0	0	0	0	0
A_09_P019651	euchromatic gene	0	0	0	1	0	0	0	0	0	0	0	0	0	0	0	0
A_09_P019656	euchromatic gene	0	0	0	0	0	0	0	0	0	0	0	0	0	0	0	0
A_09_P019666	euchromatic gene	0	0	0	0	0	0	0	0	0	0	0	0	0	0	0	0
A_09_P019671	euchromatic gene	0	0	0	0	1	0	0	0	0	0	0	0	0	0	0	0
A_09_P019676	euchromatic gene	0	0	0	0	0	0	0	0	0	0	0	0	0	0	0	0
A_09_P019681	euchromatic gene	0	0	0	0	0	0	0	0	0	0	0	0	0	0	0	0
A_09_P019686	euchromatic gene	0	0	0	0	0	0	0	0	0	0	0	0	0	0	0	0
A_09_P019691	euchromatic gene	0	0	0	0	0	0	0	0	0	0	0	0	0	0	0	0
A_09_P019696	euchromatic gene	0	0	0	0	0	0	0	0	0	0	0	0	0	0	0	0
A_09_P019706	euchromatic gene	0	0	0	0	0	0	0	0	0	0	0	0	0	0	0	0
A_09_P019711	euchromatic gene	0	0	0	0	0	0	0	0	0	0	0	0	0	0	0	0
A_09_P019716	euchromatic gene	0	0	0	0	0	0	0	0	0	0	0	0	0	0	0	0
A_09_P019721	euchromatic gene	0	0	0	1	0	0	0	0	0	0	0	0	0	0	0	0
A_09_P019726	euchromatic gene	0	0	0	0	0	0	0	0	0	0	0	0	0	0	0	0
A_09_P019731	euchromatic gene	0	0	0	0	0	0	0	0	0	0	0	0	0	0	0	0
A_09_P019736	euchromatic gene	0	0	0	0	0	0	0	0	0	0	0	0	0	0	0	0
A_09_P019741	euchromatic gene	0	0	0	0	0	0	0	0	0	0	0	0	0	0	0	0
A_09_P019746	euchromatic gene	0	0	0	0	0	0	1	0	0	0	0	0	0	0	0	0
A_09_P019751	euchromatic gene	0	0	0	0	0	0	0	0	0	0.5	0	0	2	2	0	1
A_09_P019756	euchromatic gene	0	0	0	0	0	0	0	0	0	0	0	0	0	0	0	0
A_09_P019761	euchromatic gene	0	0	0	0	0	0	0	0	0	0	0	0	0	0	0	0
A_09_P019766	euchromatic gene	0	0	0	0	0	0	0	0	0	0	0	0	0	0	0	0
A_09_P019771	euchromatic gene	0	0	0	0	0	0	0	0	0	0	0	0	0	0	0	0
A_09_P019776	euchromatic gene	0	0	0	0	0	0	0	0	0	0	0	0	0	0	0	0
A_09_P019781	euchromatic gene	0	0	0	0	0	0	0	0	0	0	0	0	0	0	0	0
A_09_P019786	euchromatic gene	0	0	0	0	0	0	0	0	0	0	0	0	0	0	0	0
A_09_P019796	euchromatic gene	0	0	0	0	0	0	0	0	0	0	0	0	0	0	0	0
A_09_P019801	euchromatic gene	0	0	0	0	0	0	0	0	0	0	0	0	0	0	0	0
A_09_P019806	euchromatic gene	0	0	0	0	0	0	0	0	0	0	0	0	0	0	0	0
A_09_P019811	euchromatic gene	0	0	0	0	0	0	0	0	0	0	0	0	0	0	0	0
A_09_P019816	euchromatic gene	0	0	0	0	0	0	0	0	0	0	0	0	0	0	0	0
A_09_P019821	euchromatic gene	0	0	0	0	0	0	0	0	0	0	0	0	0	0	0	0
A_09_P019826	euchromatic gene	3.5	1	0	0	9	0	7	0	0	0	0	0	0	0	0	0
A_09_P019831	euchromatic gene	0	0	0	0	0	0	0	0	0	0	0	0	0	0	1	0
A_09_P019836	euchromatic gene	0	0	1.5	0	0	0	0	0	0	0	0	0	0	0	0	0
A_09_P019841	euchromatic gene	0	0	0	0	0	0	0	0	0	0	0	0	0	0	0	0
A_09_P019846	euchromatic gene	0	0	0	0	0	0	0	0	0	0	0	0	0	0	0	0
A_09_P019851	euchromatic gene	0	0	0	0	0	0	0	0	0	0	0	0	0	0	0	0
A_09_P019856	euchromatic gene	0	0	0	0	0	0	0	0	0	0	0	0	0	0	0	0
A_09_P019861	euchromatic gene	0	0	0	0	0	0	0	0	0	0	0	0	0	0	0	0
A_09_P019866	euchromatic gene	0	0	0	0	0	0	0	0	0	0	0	0	0	0	0	0
A_09_P019871	euchromatic gene	0	0	0	0	0	0	0	0	0	0	0	0	0	0	0	0
A_09_P019876	euchromatic gene	0	0	0	1	0	0	0	0	0	0	0	0	0	0	0	0
A_09_P019881	euchromatic gene	0	0	0	0	0	0	0	0	0	0	0	0	0	0	0	0
A_09_P019886	euchromatic gene	0.5	0	0	0	0	8	2	0	0	0	0	0	0	0	0	0
A_09_P019891	euchromatic gene	0	0	0	0	0	0	0	0	0	0	0	0	0	0	0	0
A_09_P019896	euchromatic gene	0	0	0	0	0	0	0	0	0	0	0	0	0	0	0	0
A_09_P019901	euchromatic gene	0	0	0	0	0	0	0	0	0	0	0	0	0	0	0	0
A_09_P019906	euchromatic gene	0	0	0	0	0	0	0	0	0	0	0	0	0	0	0	0
A_09_P019911	euchromatic gene	0	0	0	0	0	0	0	0	0	0	0	0	0	0	0	0
A_09_P019916	euchromatic gene	0	0	0	1	0	0	0	0	0	0	0	0	0	0	0	0
A_09_P019921	euchromatic gene	0	0	0	0	0	0	0	0	0	0	0	0	0	0	0	0
A_09_P019926	euchromatic gene	0	0	0	0	0	0	0	0	0	0	0	0	0	0	0	0
A_09_P019931	euchromatic gene	0	0	0	0	0	0	0	0	0	0	0	0	0	0	0	0
A_09_P019936	euchromatic gene	0	0	0	0	0	0	0	0	0	0	0	0	0	0	0	0
A_09_P019941	euchromatic gene	0	0	0	0	0	0	0	0	0	0	0	0	0	0	0	0
A_09_P019946	euchromatic gene	0	0	0	0	0	0	0	0	0	0	0	0	0	0	0	0
A_09_P019951	euchromatic gene	0	0	0	0	0	0	0	0	0	0	0	0	0	0	0	0
A_09_P019956	euchromatic gene	0	0	0	0	0	0	0	0	0	0	0	0	0	0	0	0
A_09_P019961	euchromatic gene	0	0	0	0	0	0	0	0	0	0	0	0	0	0	0	0
A_09_P019966	euchromatic gene	0	0	0	0	0	0	0	0	0	0	0	0	0	0	0	0
A_09_P019971	euchromatic gene	0	0	0	0	0	0	0	0	0	0	0	0	0	0	0	0
A_09_P019976	euchromatic gene	0	0	0	0	0	0	0	0	0	0	0	0	0	0	0	0
A_09_P019986	euchromatic gene	0	0	0	0	0	0	0	0	0	0	0	0	0	0	0	0
A_09_P019991	euchromatic gene	1.5	0	0	0	0	0	0	0	0	0	0	0	0	0	0	0
A_09_P019996	euchromatic gene	0	0	0	0	0	0	0	0	0	0	0	0	0	0	0	0
A_09_P020001	euchromatic gene	0	0	0	0	0	0	0	0	0	0	0	0	0	0	0	0
A_09_P020006	euchromatic gene	0	0	0	1	0	0	0	0	0	0	0	0	0	0	0	0
A_09_P020011	euchromatic gene	0	0	0	0	0	0	0	0	0	0	0	0	0	0	0	0
A_09_P020016	euchromatic gene	0	0	0	0	0	0	0	0	0	0	0	0	0	0	0	0
A_09_P020026	euchromatic gene	0	0	0	0	0	0	0	0	0	0	0	0	0	0	0	0
A_09_P020031	euchromatic gene	0	0	0	0	0	0	0	0	0	0	0	0	0	0	0	0
A_09_P020041	euchromatic gene	4.5	0	0	0	20	0	3	0	0	0	0	0	0	0	0	0
A_09_P020046	euchromatic gene	0	0	0	0	0	0	0	0	0	0	0	0	0	0	0	0
A_09_P020051	euchromatic gene	0	0	0	0	0	0	0	0	0	0	0	0	0	0	0	0
A_09_P020056	euchromatic gene	0	0	0	0	0	0	0	0	0	0	0	0	0	0	0	0
A_09_P020061	euchromatic gene	0	0	0	0	0	0	0	0	0	0	0	0	0	0	0	0
A_09_P020066	euchromatic gene	1	0	1	0	0	0	0	0	0	0	0	0	0	0	0	0
A_09_P020071	euchromatic gene	0	0	0	0	0	0	0	0	0	0	0	0	0	0	0	0
A_09_P020076	euchromatic gene	0	0	0	0	0	0	0	0	0	0	0	0	0	0	0	0
A_09_P020081	euchromatic gene	0	0	0	0	0	0	0	0	0	0	0	0	0	0	0	0
A_09_P020086	euchromatic gene	0	0	0	0	0	0	0	0	0	0	0	0	0	0	0	0
A_09_P020091	euchromatic gene	0	0	0	0	0	0	0	0	0	0	0	0	0	0	0	0
A_09_P020096	euchromatic gene	0	0	0	2	0	0	0	0	0	0	0	0	0	0	0	0
A_09_P020101	euchromatic gene	0	0	0	0	0	0	0	0	0	0	0	0	0	0	0	0
A_09_P020106	euchromatic gene	0	0	0	0	0	0	0	0	0	0	0	0	0	0	0	0
A_09_P020111	euchromatic gene	0	0	0	0	0	0	0	0	0	0	0	0	0	0	0	0
A_09_P020116	euchromatic gene	0	0	0	0	0	0	0	0	0	0	0	0	0	0	0	0
A_09_P020121	euchromatic gene	0	0	0	0	0	0	0	0	0	0	0	0	0	0	0	0
A_09_P020126	euchromatic gene	0	0	0	0	0	0	0	0	0	0	0	0	0	0	0	0
A_09_P020131	euchromatic gene	0	0	0	0	0	0	0	0	0	0	0	0	0	0	0	0
A_09_P020136	euchromatic gene	0	0	0	0	0	0	0	0	0	0	0	0	0	0	0	0
A_09_P020141	euchromatic gene	0	0	0	0	0	0	0	0	0	0	0	0	0	0	0	0
A_09_P020146	euchromatic gene	0	0	0	0	0	0	0	0	0	0	0	0	0	0	0	0
A_09_P020151	euchromatic gene	0	0	0	0	0	0	0	0	0	0	0	0	0	0	0	0
A_09_P020156	euchromatic gene	0	0	0	0	0	0	0	0	0	0	0	0	0	0	0	0
A_09_P020161	euchromatic gene	0	0	0	0	0	0	0	0	0	0	0	0	0	0	0	0
A_09_P020166	euchromatic gene	0	0	0	0	0	0	0	0	0	0	0	0	0	0	0	0
A_09_P020171	euchromatic gene	0.5	0	0	0	0	0	0	0	0	0	0.5	0	0	0	0	0
A_09_P020181	euchromatic gene	0	0	0	0	0	0	0	0	0	0	0	0	0	0	0	0
A_09_P020186	euchromatic gene	0	0	0	0	0	0	0	0	0	0	0	0	0	0	0	0
A_09_P020191	euchromatic gene	0	0	0	0	0	0	0	0	0	0	0	0	0	0	0	0
A_09_P020196	euchromatic gene	0	0	0	0	0	0	0	0	0	0	0	0	0	0	0	0
A_09_P020201	euchromatic gene	0	0	0	0	0	0	0	0	0	0	0	0	0	0	0	0
A_09_P020206	euchromatic gene	0	0	0	0	0	0	0	0	0	0	0	0	0	0	0	0
A_09_P020211	euchromatic gene	0	0	0	0	0	0	0	0	0	0	0	0	0	0	0	0
A_09_P020216	euchromatic gene	0	0	0	0	0	0	0	0	0	0	0	0	0	0	0	0
A_09_P020221	euchromatic gene	0	2	0	0	0	0	0	0	0	0	0	0	0	0	0	0
A_09_P020226	euchromatic gene	0	0	0	0	0	0	0	0	0	0	0	0	0	0	0	0
A_09_P020231	euchromatic gene	1.5	0	0	0	0	0	0	0	0	0	0	0	0	0	0	0
A_09_P020236	euchromatic gene	0	0	0	0	0	0	0	0	0	0	0	0	0	0	0	0
A_09_P020241	euchromatic gene	0	0	0	0	0	0	0	0	0.5	0	0	0	0	0	0	0
A_09_P020246	euchromatic gene	0	0	0	0	0	0	0	0	0	0	0	0	0	0	0	0
A_09_P020251	euchromatic gene	0	0	0	0	0	0	0	0	0	0	0	0	0	0	0	0
A_09_P020256	euchromatic gene	0	0	0	0	0	0	0	0	0	0	0	0	0	0	0	0
A_09_P020261	euchromatic gene	0	0	0	0	0	0	0	0	0	0	0	0	0	0	0	0
A_09_P020266	euchromatic gene	0	0	0	0	0	0	0	0	0	0	0	0	0	0	0	0
A_09_P020271	euchromatic gene	0	0.5	0	0	0	0	0	0	0	0	0	0	0	0	0	0
A_09_P020276	euchromatic gene	0	0	0	0	0	0	0	0	0	0	0	0	0	0	0	0
A_09_P020281	euchromatic gene	0	0	0	0	0	0	0	0	0	0	0	0	0	0	0	0
A_09_P020286	euchromatic gene	0	0	0	0	0	0	0	0	0	0	0	0	0	0	0	0
A_09_P020296	euchromatic gene	0	0	0	0	0	0	0	0	0	0	0	0	0	0	0	0
A_09_P020301	euchromatic gene	1	0	0	0	0	0	0	0	0	0	0	0	0	0	0	0
A_09_P020306	euchromatic gene	0	0	0	1	0	0	0	0	0	0	0	0	0	0	0	0
A_09_P020311	euchromatic gene	0	0	0	0	0	0	0	0	0	0	0	0	0	0	0	0
A_09_P020316	euchromatic gene	0	0	0	0	0	0	0	0	0	0	0	0	0	0	0	0
A_09_P020321	euchromatic gene	0	0	0	0	0	0	0	0	0	0	0	0	0	0	0	0
A_09_P020326	euchromatic gene	0	0	0	0	0	0	0	0	0	0	0	0	0	0	0	0
A_09_P020331	euchromatic gene	0	0	0	0	0	0	0	0	0	0	0	0	0	0	0	0
A_09_P020336	euchromatic gene	0	0	0	0	0	0	0	0	0	0	0	0	0	0	0	0
A_09_P020341	euchromatic gene	0	0	0	0	0	0	0	0	0	0	0	0	0	0	0	0
A_09_P020346	euchromatic gene	1	0	0	0	0	0	1	0	0	0	0	0	0	0	0	0
A_09_P020351	euchromatic gene	0	0	0	0	0	0	0	0	0	0	0	0	0	0	0	0
A_09_P020356	euchromatic gene	0	0	0	0	0	0	0	0	0	0	0	0	0	0	0	0
A_09_P020361	euchromatic gene	3	0	0	1	10	0	2	0	0	0	0	0	0	0	0	0
A_09_P020366	euchromatic gene	0	0	0	0	0	0	0	0	0	0	0	0	0	0	0	0
A_09_P020371	euchromatic gene	0	0	0	0	0	0	0	0	0	0	0	0	0	0	0	0
A_09_P020376	euchromatic gene	0	0	0	0	0	0	0	0	0	0	0	0	0	0	0	0
A_09_P020381	euchromatic gene	0	0	0	0	0	0	0	0	0	0	0	0	0	0	0	0
A_09_P020386	euchromatic gene	0	0	0	0	0	0	0	0	0	0	0	0	0	0	0	0
A_09_P020396	euchromatic gene	0	0	0	0	0	0	0	0	0	0	0	0	0	0	0	0
A_09_P020401	euchromatic gene	0	0	0	0	0	0	0	0	0	0	0	0	0	0	0	0
A_09_P020406	euchromatic gene	0	0	0	0	0	0	0	0	0	0	0	0	0	0	0	0
A_09_P020411	euchromatic gene	0	0	0	0	0	0	0	0	0	0	0	0	0	0	0	0
A_09_P020416	euchromatic gene	0	0	0	0	0	0	0	0	0	0	0	0	0	0	0	0
A_09_P020421	euchromatic gene	0	0	0	0	0	0	0	0	0	0	0	0	0	0	0	0
A_09_P020426	euchromatic gene	0	0	0	0	0	0	0	0	0	0	0	0	0	0	0	0
A_09_P020431	euchromatic gene	0	0	0	0	0	0	0	0	0	0	0	0	0	0	0	0
A_09_P020436	euchromatic gene	0	0	0	0	0	0	0	0	0	0	0	0	0	0	0	0
A_09_P020441	euchromatic gene	0	0	0	0	0	0	0	0	0	0	0	0	0	0	0	0
A_09_P020446	euchromatic gene	0	0	0	1	0	0	0	0	0	0	0	0	0	0	0	0
A_09_P020451	euchromatic gene	0	0	0	0	0	0	0	0	0	0	0	0	0	0	0	0
A_09_P020456	euchromatic gene	0	0	0	1	0	0	0	0	0	0	0	0	0	0	0	0
A_09_P020461	euchromatic gene	0	0	0	0	0	1	0	0	0	0	0	0	0	0	0	0
A_09_P020466	euchromatic gene	0	0	0	0	0	0	0	0	0	0	0	0	0	0	0	0
A_09_P020471	euchromatic gene	0	0	0	0	0	0	0	0	0	0	0	0	0	0	0	0
A_09_P020476	euchromatic gene	0	0	0	0	0	0	0	0	0	0	0	0	0	0	0	0
A_09_P020481	euchromatic gene	0	0	0	0	0	0	0	0	0	0	0	0	0	0	0	0
A_09_P020486	euchromatic gene	0	0	0	0	0	0	0	0	0	0	0	0	0	0	0	0
A_09_P020491	euchromatic gene	0	0	0	0	0	0	0	0	0	0	0	0	0	0	0	0
A_09_P020496	euchromatic gene	0	0	0	0	0	0	0	0	0	0	0	0	0	0	0	0
A_09_P020501	euchromatic gene	0	0	0	0	0	0	0	0	0	0	0.5	0	0	0	0	0
A_09_P020506	euchromatic gene	0	0	0	0	0	0	0	0	0	0	0	0	0	0	0	0
A_09_P020511	euchromatic gene	0	0	0	0	0	0	0	0	0	0	0	0	0	0	0	0
A_09_P020516	euchromatic gene	0	0	0	0	0	0	0	0	0	0	0	0	0	0	0	0
A_09_P020521	euchromatic gene	0	0	0	0	0	0	0	0	0	0	0	0	0	0	0	0
A_09_P020526	euchromatic gene	0	0	0	0	0	0	0	0	0	0	0	0	0	0	0	0
A_09_P020531	euchromatic gene	0	0	0.5	0	0	0	0	0	0	0	0	0	0	0	0	0
A_09_P020536	euchromatic gene	0	0	0	0	0	0	0	0	0	0	0	0	0	0	0	0
A_09_P020541	euchromatic gene	0	0	0	0	0	0	0	0	0	0	0	0	0	0	0	0
A_09_P020546	euchromatic gene	0	0	0	0	0	0	0	0	0	0	0	0	0	0	0	0
A_09_P020551	euchromatic gene	0	0	0	0	0	0	0	0	0	0	0	0	0	0	0	0
A_09_P020556	euchromatic gene	0	0	0	0	0	0	0	0	0	0	0	0	0	0	0	0
A_09_P020561	euchromatic gene	0	0	0	0	0	0	0	0	0	0	0	0	0	0	0	0
A_09_P020566	euchromatic gene	0	0	0	0	0	0	0	0	0	0	0	0	0	0	0	0
A_09_P020571	euchromatic gene	0	0	0	0	0	0	0	0	0	0	0	0	0	0	0	0
A_09_P020576	euchromatic gene	0	0	0	0	0	0	0	0	0	0	0	0	0	0	0	0
A_09_P020581	euchromatic gene	0	0	0	0	0	0	0	0	0	0	0	0	0	0	0	0
A_09_P020586	euchromatic gene	0	0	0	0	0	0	0	0	0	0	0	0	0	0	0	0
A_09_P020591	euchromatic gene	0	0	0	0	0	0	0	0	0	0	0	0	0	0	0	0
A_09_P020596	euchromatic gene	0	0	0	0	0	0	0	0	0	0	0	0	0	0	0	0
A_09_P020601	euchromatic gene	3.5	0	0	0	1	0	0	0	0	0	0	0	0	0	0	0
A_09_P020606	euchromatic gene	0	0	0	0	0	0	0	0	0	0	0	0	0	0	0	0
A_09_P020611	euchromatic gene	0	0	0	0	0	0	0	0	0	0	0	0	0	0	0	0
A_09_P020616	euchromatic gene	0	0	0	0	0	0	0	0	0	0	0	0	0	0	0	0
A_09_P020621	euchromatic gene	0	0	0	0	0	0	0	0	0	0	0	0	0	0	0	0
A_09_P020626	euchromatic gene	0	0	0	0	0	0	0	0	0	0	0	0	0	0	0	0
A_09_P020631	euchromatic gene	0	0	0	0	0	0	0	0	0	0	0	0	0	0	0	0
A_09_P020636	euchromatic gene	0	0	0	0	0	0	0	0	0	0	0	0	0	0	0	0
A_09_P020641	euchromatic gene	0	0	0	0	0	0	0	0	0	0	0	0	0	0	0	0
A_09_P020646	euchromatic gene	0	0	0	0	0	0	0	0	0	0	0	0	0	0	0	0
A_09_P020651	euchromatic gene	1	0	0	0	1	0	0	0	0	0	0	0	0	0	0	0
A_09_P020656	euchromatic gene	0	0	0	0	0	0	0	0	0	0	0	0	0	0	0	0
A_09_P020661	euchromatic gene	0.5	0	0	0	1	0	0	0	0	0	0	0	0	1	0	0
A_09_P020666	euchromatic gene	0	0	0	0	0	1	0	0	0	0	1	0	0	0	0	0
A_09_P020671	euchromatic gene	0	0	0	0	0	0	0	0	0	0	0	0	0	0	0	0
A_09_P020676	euchromatic gene	0	0	0	0	0	0	0	0	0	0	0	0	0	0	0	0
A_09_P020681	euchromatic gene	0	0	0	0	0	0	0	0	0	0	0	0	0	0	0	0
A_09_P020686	euchromatic gene	0	0	0	0	0	0	0	0	0	0	0	0	0	0	0	0
A_09_P020691	euchromatic gene	0	0	0	0	0	0	0	0	0	0	0	0	0	0	0	0
A_09_P020696	euchromatic gene	0	0	0	0	0	0	0	0	0	0	0	0	0	0	0	0
A_09_P020701	euchromatic gene	0	0	0.5	0	0	0	0	0	0	0	0	0	0	0	0	0
A_09_P020706	euchromatic gene	0	0	0	0	0	0	0	0	0	0	0	0	0	0	0	0
A_09_P020711	euchromatic gene	0	0	0	0	0	0	0	0	0	0	0	0	0	0	0	0
A_09_P020716	euchromatic gene	0	0	0	0	0	0	0	0	0	0	0	0	0	0	0	0
A_09_P020721	euchromatic gene	0	0	0	0	0	0	0	0	0	0	0	0	0	0	0	0
A_09_P020731	euchromatic gene	0	0	0	0	0	0	0	0	0	0	0	0	0	0	0	0
A_09_P020736	euchromatic gene	0	0	0	0	0	0	0	0	0	0	0	0	0	0	0	0
A_09_P020741	euchromatic gene	0	0	0	0	0	0	0	0	0	0	0	0	0	0	0	0
A_09_P020746	euchromatic gene	0	0	0	0	0	0	0	0	0	0	0	0	0	0	0	0
A_09_P020751	euchromatic gene	0	1.5	0	0	0	0	0	0	0	0	0	0	0	0	0	0
A_09_P020756	euchromatic gene	0	0	0	0	0	0	0	0	0	0	0	0	0	1	0	0
A_09_P020761	euchromatic gene	0	0	0	0	0	0	0	0	0	0	0	0	0	0	0	0
A_09_P020766	euchromatic gene	0	0	0	0	0	0	0	0	0	0	0	0	0	0	0	0
A_09_P020771	euchromatic gene	0	0	0	0	1	0	0	0	0	0	0	0	0	0	0	0
A_09_P020776	euchromatic gene	0	0	0	0	0	0	0	0	0	0	0	0	0	0	0	0
A_09_P020781	euchromatic gene	0	0	1	0	0	0	0	0	0	0	0	0	0	0	0	0
A_09_P020786	euchromatic gene	0	0	0	0	0	0	0	0	0	0	0	0	0	0	0	0
A_09_P020791	euchromatic gene	0	0	0	0	0	0	0	0	0	0	0	0	0	0	0	0
A_09_P020796	euchromatic gene	0	0	0	0	0	0	0	0	0	0	0	0	0	0	1	0
A_09_P020801	euchromatic gene	0	0	0	0	0	0	0	0	0	0	0	0	0	0	0	0
A_09_P020806	euchromatic gene	0.5	0	0	0	0	0	0	0	0	0	0	0	0	0	0	0
A_09_P020811	euchromatic gene	0	0	0	0	0	0	0	0	0	0	0	0	0	0	0	0
A_09_P020816	euchromatic gene	0	0	0	0	0	0	0	0	0	0	0	0	0	0	0	0
A_09_P020821	euchromatic gene	0	0	0	0	0	0	0	0	0	0	0	0	0	0	0	0
A_09_P020826	euchromatic gene	0	0	0	0	0	0	0	0	0	0	0	0	0	0	0	0
A_09_P020831	euchromatic gene	0	0	0	0	0	0	0	0	0	0	0	0	0	0	0	0
A_09_P020836	euchromatic gene	0	0	0	0	0	0	0	0	0	0	0	0	0	0	0	0
A_09_P020841	euchromatic gene	0	0	0	0	0	0	0	0	0	0	0	0	0	0	0	0
A_09_P020846	euchromatic gene	0	0	0	0	0	0	0	0	0	0	0	0	0	0	0	0
A_09_P020851	euchromatic gene	0	0	0	0	0	0	0	0	0	0	0	0	0	0	0	0
A_09_P020856	euchromatic gene	0	0	0	0	0	0	0	0	0	0	0	0	0	0	0	0
A_09_P020861	euchromatic gene	0	0	0	0	0	0	0	0	0	0	0	0	0	0	0	0
A_09_P020866	euchromatic gene	0	0	0	0	0	0	0	0	0	0	0	0	0	0	0	0
A_09_P020871	euchromatic gene	0	0	0	0	0	0	0	0	0	0	0	0	0	0	0	0
A_09_P020876	euchromatic gene	0	0	0	0	0	0	0	0	0	0	0	0	0	0	0	0
A_09_P020881	euchromatic gene	0	0	0	0	6	0	0	0	0	0	0	0	0	0	0	0
A_09_P020886	euchromatic gene	0	0	0	0	0	0	0	0	0	0	0	0	0	0	0	0
A_09_P020891	euchromatic gene	0	0	0	0	0	0	0	0	0	0	0	0	0	0	0	0
A_09_P020896	euchromatic gene	0	0	0	0	0	0	0	0	0	0	0	0	0	0	0	0
A_09_P020901	euchromatic gene	0	0	0	0	0	0	0	0	0	0	0	0	0	0	0	0
A_09_P020906	euchromatic gene	0	0	0	0	0	0	0	0	0	0	0	0	0	0	0	0
A_09_P020911	euchromatic gene	0	0	0	0	0	0	0	0	0	0	0	0	0	0	0	0
A_09_P020916	euchromatic gene	0	0	0	0	0	0	0	0	0	0	0	0	0	0	0	0
A_09_P020921	euchromatic gene	0	0	0	0	0	0	0	0	0	0	0	0	0	0	0	0
A_09_P020926	euchromatic gene	0	0	0	0	0	0	0	0	0	0	0	0	0	0	0	0
A_09_P020931	euchromatic gene	0	0	0	0	0	0	0	0	0	0	0	0	0	0	0	0
A_09_P020936	euchromatic gene	1	0	2.5	1	0	1	0	0	0	0	0	0	0	0	0	0
A_09_P020941	euchromatic gene	0	0	0	0	0	0	0	0	0	0	0	0	0	0	0	0
A_09_P020946	euchromatic gene	0	0	0	0	0	0	0	0	0	0	0	0	0	0	0	0
A_09_P020951	euchromatic gene	0	0	0	0	0	0	0	0	0	0	0	0	0	0	0	0
A_09_P020956	euchromatic gene	0.5	0	0.5	0	2	0	0	0	0	0	0	0	0	0	0	0
A_09_P020961	euchromatic gene	0	0	0	0	1	0	1	0	0	0	0	0	0	0	0	0
A_09_P020966	euchromatic gene	0	0	0	0	0	0	0	0	0	0	0	0	0	0	0	0
A_09_P020971	euchromatic gene	0	0	0	1	0	0	0	0	0	0	0	0	0	0	0	0
A_09_P020976	euchromatic gene	0	0	0	1	0	0	0	0	0	0	0	0	0	0	0	0
A_09_P020981	euchromatic gene	0	0	0	0	0	0	0	0	0	0	0	0	0	0	0	0
A_09_P020986	euchromatic gene	0	0	0	0	0	0	0	0	0	0	0	0	0	0	0	0
A_09_P020991	euchromatic gene	0	0	0	0	0	0	0	0	0	0	0	0	0	0	0	0
A_09_P020996	euchromatic gene	0	0	0	0	0	0	0	0	0	0	0	0	0	0	0	0
A_09_P021001	euchromatic gene	0	0	0	0	0	0	0	0	0	0	0	0	0	0	0	0
A_09_P021006	euchromatic gene	0	0	0	0	0	0	0	0	0	0	0	0	0	0	0	0
A_09_P021011	euchromatic gene	0	0	0	0	0	0	0	0	0	0	0	0	0	0	0	0
A_09_P021016	euchromatic gene	0	0	0	0	0	0	0	0	0	0	0	0	0	0	0	0
A_09_P021021	euchromatic gene	0	0	0	0	0	0	0	0	0	0	0.5	0	0	0	0	0
A_09_P021026	euchromatic gene	0	0	0	1	1	0	0	0	0	0	0	0	0	0	0	0
A_09_P021031	euchromatic gene	0	0	0	0	0	0	0	0	0	0	0	0	0	0	0	0
A_09_P021036	euchromatic gene	0	0	0	0	0	0	0	0	0	0	0	0	0	0	0	0
A_09_P021041	euchromatic gene	0	0	0	0	0	0	0	0	0	0	0	0	0	0	0	0
A_09_P021046	euchromatic gene	0	0	0	0	0	0	0	0	0	0	0	0	0	0	0	0
A_09_P021051	euchromatic gene	0	0	0	0	0	0	0	0	0	0	0	0	0	0	0	0
A_09_P021056	euchromatic gene	0	0	0	0	0	0	0	0	0	0	0	0	0	0	0	0
A_09_P021061	euchromatic gene	0	0	0	0	0	0	0	0	0	0	0	0	0	0	0	0
A_09_P021066	euchromatic gene	0	0	0	0	0	0	0	0	0	0	0	0	0	0	0	0
A_09_P021071	euchromatic gene	0	0	0	0	0	0	0	0	0	0	0	0	0	0	0	0
A_09_P021076	euchromatic gene	0	0	0	0	0	0	0	0	0	0	0	0	0	0	0	0
A_09_P021086	euchromatic gene	0	0	0	0	0	0	0	0	0	0	0	0	0	0	0	0
A_09_P021091	euchromatic gene	0	0	0	0	0	0	0	0	0	0	0	0	0	0	0	0
A_09_P021096	euchromatic gene	0	0	0	0	0	0	0	0	0	0	0	0	0	0	0	0
A_09_P021101	euchromatic gene	0	0	0	0	0	0	0	0	0	0	0	0	0	0	0	0
A_09_P021106	euchromatic gene	0	0	0	0	0	0	0	0	0	0	0	0	0	0	0	0
A_09_P021111	euchromatic gene	0	0	0	0	0	0	0	0	0	0	0	0	0	0	0	0
A_09_P021116	euchromatic gene	0	0	0	0	0	0	0	0	0	0	0	0	0	0	0	0
A_09_P021121	euchromatic gene	0	0	0	0	0	0	0	0	0	0	0	0	0	0	0	0
A_09_P021126	euchromatic gene	0	0	0	1	0	0	0	0	0	0	0	0	0	0	0	0
A_09_P021131	euchromatic gene	0	0	0	0	0	0	0	0	0	0	0	0	0	0	0	0
A_09_P021136	euchromatic gene	0	0	0	0	0	0	0	0	0	0	0	0	0	0	0	0
A_09_P021141	euchromatic gene	0	0	0	0	0	0	0	0	0	0	0	0	0	0	0	0
A_09_P021146	euchromatic gene	0	0	0	0	0	0	0	0	0	0	0	0	0	0	0	0
A_09_P021151	euchromatic gene	0	0	0	0	1	0	1	0	0	0	0	0	0	0	0	0
A_09_P021156	euchromatic gene	0	0	0	0	0	0	0	0	0	0	0	0	0	0	0	0
A_09_P021166	euchromatic gene	0	0	0	0	0	0	0	0	0	0	0	0	0	0	0	0
A_09_P021171	euchromatic gene	0	0	0	0	0	0	0	0	0	0	0	0	0	0	0	0
A_09_P021176	euchromatic gene	0	0	0	0	0	0	0	0	0	0	0	0	0	0	0	0
A_09_P021181	euchromatic gene	0	0	0	0	0	0	0	0	0	0	0	0	0	0	0	0
A_09_P021186	euchromatic gene	0	0	0	0	0	0	0	0	0	0	0	0	0	0	0	0
A_09_P021191	euchromatic gene	0	0	0	0	0	0	0	0	0	0	0	0	0	0	0	0
A_09_P021196	euchromatic gene	0	0	0	0	0	0	0	0	0	0	0	0	0	0	0	0
A_09_P021201	euchromatic gene	0	0	0	0	0	0	0	0	0	0	0	0	0	0	0	0
A_09_P021206	euchromatic gene	0	0	0	1	1	0	0	0	0	0	0	0	0	0	0	0
A_09_P021211	euchromatic gene	0	0	0	0	0	0	0	0	0	0	0	0	0	0	0	0
A_09_P021216	euchromatic gene	0	0	0	0	0	1	0	0	0	0	0	0	1	0	0	0
A_09_P021221	euchromatic gene	0	0	0	0	0	0	0	0	0	0	0	0	0	0	0	0
A_09_P021226	euchromatic gene	0	0	0	0	0	0	0	0	0	0	0	0	0	0	0	0
A_09_P021231	euchromatic gene	0	0	0	0	0	0	0	0	0	0	0	0	0	0	0	0
A_09_P021236	euchromatic gene	0	0	0	0	0	0	0	0	0	0	0	0	0	0	0	0
A_09_P021241	euchromatic gene	0.5	0	0	0	0	0	0	0	0	0	0	0	0	0	0	0
A_09_P021246	euchromatic gene	0	0	0	0	0	0	0	0	0.5	0	0	0	0	0	0	0
A_09_P021251	euchromatic gene	0	0	0	0	1	0	0	1	0	0	0	0	0	0	0	0
A_09_P021256	euchromatic gene	0	1	0	0	0	0	0	0	0	0	0	0	0	0	0	0
A_09_P021261	euchromatic gene	0	0	0	0	0	0	0	0	0	0	0	0	0	0	0	0
A_09_P021266	euchromatic gene	0	0	0	0	0	0	0	0	0	0	0	0	0	0	0	0
A_09_P021271	euchromatic gene	0	0	0	0	0	0	0	0	0	0	0	0	0	0	0	0
A_09_P021276	euchromatic gene	0	0	0	0	0	0	0	0	0	0	0	0	0	0	0	0
A_09_P021281	euchromatic gene	1	0	0	0	0	0	0	0	0	0	0	2	0	0	0	0
A_09_P021286	euchromatic gene	0	0	0	0	0	0	0	0	0	0	0	0	0	0	0	0
A_09_P021291	euchromatic gene	0	0	0	0	1	0	0	0	0	0	0	0	0	0	0	0
A_09_P021296	euchromatic gene	0	0	0	0	0	0	0	0	0	0	0	0	0	0	0	0
A_09_P021301	euchromatic gene	0	0	0	1	0	0	0	0	0	0	0	0	0	0	0	0
A_09_P021306	euchromatic gene	0	0	0	0	0	0	0	0	0	0	0	0	0	0	0	0
A_09_P021311	euchromatic gene	0.5	0	0	0	0	0	0	0	0	0	0	0	0	0	0	0
A_09_P021316	euchromatic gene	0	0	0	1	0	0	0	0	0	0	0	0	0	0	0	0
A_09_P021321	euchromatic gene	0	0	0	0	0	0	0	0	0.5	0	0	0	0	0	0	0
A_09_P021326	euchromatic gene	0	0	0	0	0	0	0	0	0	0	0	0	0	0	0	0
A_09_P021331	euchromatic gene	0	0	0	0	0	0	0	0	0	0	0	0	0	0	0	0
A_09_P021336	euchromatic gene	0	0	0	0	0	0	0	0	0	0	0	0	0	0	0	0
A_09_P021341	euchromatic gene	0	0	0	0	0	0	0	0	0	0	0	0	0	0	0	0
A_09_P021346	euchromatic gene	0	0	0	0	0	0	0	0	0	0	0	0	0	0	0	0
A_09_P021351	euchromatic gene	0	0	0	0	0	0	0	0	0	0	0	0	0	0	0	0
A_09_P021356	euchromatic gene	0	0	0	0	0	0	0	0	0	0	0	0	0	0	0	0
A_09_P021361	euchromatic gene	0	0	0	0	0	0	0	0	0	0	0	0	0	0	0	0
A_09_P021366	euchromatic gene	0	0	0	0	1	0	1	0	0	0	0	0	0	0	0	0
A_09_P021371	euchromatic gene	0	0	0	0	0	0	0	0	0	0	0	0	0	0	0	0
A_09_P021376	euchromatic gene	0	0	0	0	0	0	0	0	0	0	0	0	0	0	0	0
A_09_P021381	euchromatic gene	0	0	0	1	0	0	0	0	0	0	0	0	0	0	0	0
A_09_P021386	euchromatic gene	0	0	0	0	0	0	0	0	0	0	0	0	0	0	0	0
A_09_P021391	euchromatic gene	0	0	0	0	0	0	0	0	0	0	0	0	0	0	0	0
A_09_P021396	euchromatic gene	0	0	0	0	0	0	0	0	0	0	0	0	0	0	0	0
A_09_P021401	euchromatic gene	0	0	0	0	0	0	0	0	0	0	0	0	0	0	0	0
A_09_P021406	euchromatic gene	0	0	0	0	2	0	0	0	0	0	0	0	0	0	0	0
A_09_P021411	euchromatic gene	0	0	0	0	0	0	0	0	0	0	0	0	0	0	0	0
A_09_P021416	euchromatic gene	0	0	0	0	0	0	1	0	0	0	0	0	0	0	0	0
A_09_P021421	euchromatic gene	0	0	0	0	0	0	0	0	0	0	0	1	0	0	0	0
A_09_P021426	euchromatic gene	0	0	0	0	0	0	0	0	0	0	0	0	0	0	0	0
A_09_P021431	euchromatic gene	0	0	0	0	0	0	0	0	0	0	0	0	0	0	0	0
A_09_P021436	euchromatic gene	0	0	0	0	0	0	0	0	0	0	0	0	0	0	0	0
A_09_P021441	euchromatic gene	0	0	0	0	0	0	0	0	0	0	0	0	0	0	0	0
A_09_P021446	euchromatic gene	0	0	0	0	1	0	0	0	0	0	0	0	0	0	0	0
A_09_P021456	euchromatic gene	0	0	0	0	0	0	0	0	0	0	0	0	0	0	0	0
A_09_P021461	euchromatic gene	0	0	0	0	0	0	0	0	0	0	0	0	0	0	0	0
A_09_P021466	euchromatic gene	0	0	0	0	0	0	0	0	0	0	0	0	0	0	0	0
A_09_P021471	euchromatic gene	0	0	0	0	0	0	0	0	0	0	0	0	0	0	0	0
A_09_P021476	euchromatic gene	0	1	0	0	0	0	0	0	0	0	0	0	0	0	0	0
A_09_P021481	euchromatic gene	0	0	0	0	0	0	0	0	0	0	0	0	0	0	0	0
A_09_P021486	euchromatic gene	0	0	0	0	0	0	0	0	0	0	0	0	0	0	0	0
A_09_P021491	euchromatic gene	0	0	0	0	1	0	0	0	0	0	0	0	0	0	0	0
A_09_P021496	euchromatic gene	0	0	0	0	0	0	0	0	0	0	0	0	0	0	0	0
A_09_P021501	euchromatic gene	0	0	0	0	0	0	0	0	0	0	0	0	0	0	0	0
A_09_P021506	euchromatic gene	0	0	0	0	0	0	0	0	0	0	0	0	0	0	0	0
A_09_P021511	euchromatic gene	0	0	0	0	0	0	0	0	0	0	0	0	0	0	0	0
A_09_P021516	euchromatic gene	0	0	0	1	0	0	0	0	0	0	0	0	0	0	0	0
A_09_P021521	euchromatic gene	0	0	0	0	0	0	0	0	0	0	0	0	0	0	0	0
A_09_P021526	euchromatic gene	0	0	0	0	0	0	0	0	0	0	0	0	0	0	0	0
A_09_P021531	euchromatic gene	0	0	0	0	0	0	0	0	0	0	0	0	0	0	0	0
A_09_P021536	euchromatic gene	0	0	0	0	0	0	0	0	0	0	0	0	0	0	0	0
A_09_P021541	euchromatic gene	0	0	0	0	0	0	0	0	0	0	0	0	0	0	0	0
A_09_P021546	euchromatic gene	0	0	1.5	0	0	0	0	0	0	0	0	0	0	0	0	0
A_09_P021551	euchromatic gene	0	0	0	0	0	0	0	0	0	0	0	0	0	0	0	0
A_09_P021556	euchromatic gene	0	0	0	1	0	0	0	0	0	0	0	0	0	0	0	0
A_09_P021561	euchromatic gene	0	0	0	0	0	0	0	0	0	0	0	0	0	0	0	0
A_09_P021566	euchromatic gene	0	0	0	0	0	0	1	1	0	0	0	0	0	0	0	0
A_09_P021571	euchromatic gene	0	0	0	0	0	0	0	0	0	0	0	0	0	0	0	0
A_09_P021576	euchromatic gene	0	0	0	0	0	0	0	0	0	0	0	0	0	0	0	0
A_09_P021581	euchromatic gene	0	0	0	0	0	0	0	0	0	0	0	0	0	0	0	0
A_09_P021586	euchromatic gene	0	0	0	0	0	0	0	0	0	0	0	0	0	0	0	0
A_09_P021591	euchromatic gene	0	0	0	0	0	0	0	0	0	0	0	0	0	0	0	0
A_09_P021596	euchromatic gene	1	0	0	0	0	0	0	0	0.5	0.5	0	0	1	0	0	0
A_09_P021601	euchromatic gene	0.5	0.5	0	0	1	0	0	0	1	0	0	0	0	0	0	0
A_09_P021606	euchromatic gene	0	0	0	1	0	0	0	0	0	0	0	0	0	0	0	0
A_09_P021611	euchromatic gene	0	0	0	0	0	0	0	0	0	0	0	0	0	0	0	0
A_09_P021616	euchromatic gene	0	0	0	0	0	0	0	0	0	0	0	0	0	0	0	0
A_09_P021621	euchromatic gene	0	0	0	0	0	0	0	0	0	0	0	0	0	0	0	0
A_09_P021626	euchromatic gene	0	0	0	1	0	0	0	0	0	0	0	0	0	0	0	0
A_09_P021631	euchromatic gene	0.5	0	0	0	0	0	0	0	0	0	0	0	0	0	0	0
A_09_P021636	euchromatic gene	0	0	0	0	0	0	0	0	0	0	0	0	0	0	0	0
A_09_P021641	euchromatic gene	0	0	0	0	0	0	0	0	0	0	0	0	0	0	0	0
A_09_P021646	euchromatic gene	0	0	0	0	0	0	0	0	0	0	0	0	0	0	0	0
A_09_P021651	euchromatic gene	0	0	0	0	0	0	0	0	0.5	0	0	0	0	0	0	0
A_09_P021656	euchromatic gene	0.5	0	0	0	0	0	0	0	0	0	0	0	0	0	0	0
A_09_P021661	euchromatic gene	0	0	0	0	0	0	0	0	0	0	0	0	0	0	0	0
A_09_P021666	euchromatic gene	0	0	0	0	0	0	0	0	0	0	0	0	0	0	0	0
A_09_P021671	euchromatic gene	0	0	0	0	0	0	0	0	0	0	0	0	0	0	0	0
A_09_P021676	euchromatic gene	0	0	0	0	0	0	0	0	0	0	0	0	0	0	0	0
A_09_P021681	euchromatic gene	0	0	0	0	0	0	0	0	0	0	0	0	0	0	0	0
A_09_P021686	euchromatic gene	0	0	0	0	0	0	0	0	0	0	0	0	0	0	0	0
A_09_P021691	euchromatic gene	0	0	0	0	0	0	0	0	0	0	0	0	0	0	0	0
A_09_P021696	euchromatic gene	0	0	0	0	0	0	0	0	0	0	0	0	0	0	0	0
A_09_P021701	euchromatic gene	0	0	0	0	0	0	0	0	0	0	0	0	0	0	0	0
A_09_P021706	euchromatic gene	0	0	0	0	0	0	0	0	0	0	0	0	0	0	0	0
A_09_P021711	euchromatic gene	0	0	0	0	0	0	0	0	0	0	0	0	0	0	0	0
A_09_P021716	euchromatic gene	0	0	0	0	0	0	0	0	0	0	0	0	0	0	0	0
A_09_P021721	euchromatic gene	0	0	0	0	0	0	0	0	0	0	0	0	0	0	0	0
A_09_P021726	euchromatic gene	0	0	0	0	0	0	1	0	0	0	0	0	0	0	0	0
A_09_P021731	euchromatic gene	0	0	0	0	0	0	0	0	0	0	0	0	0	0	0	0
A_09_P021736	euchromatic gene	0	0	0	0	0	0	0	0	0	0	0	0	0	0	0	0
A_09_P021741	euchromatic gene	0	0	0	0	0	0	0	0	0	0	0	0	0	0	0	0
A_09_P021746	euchromatic gene	0	0	0	0	0	0	0	0	0	0	0	0	0	0	0	0
A_09_P021751	euchromatic gene	0	0	0	0	0	0	0	0	0	0	0	0	0	0	0	0
A_09_P021756	euchromatic gene	0	1	0	0	0	0	0	0	0	0	0	0	0	0	0	0
A_09_P021761	euchromatic gene	0	0	0	0	1	0	0	0	0	0	0	0	0	0	0	0
A_09_P021766	euchromatic gene	0	0	0	1	0	0	0	0	0	0	0	0	0	0	0	0
A_09_P021771	euchromatic gene	0.5	0	0.5	0	0	0	0	0	0	0	0	0	0	0	0	0
A_09_P021776	euchromatic gene	0	0.5	0	0	0	0	0	0	0	0	0	0	0	0	0	0
A_09_P021781	euchromatic gene	0	0	0	0	0	0	0	0	0	0	0	0	0	0	0	0
A_09_P021786	euchromatic gene	0	0	0	0	0	0	0	0	0	0	0	0	0	0	0	0
A_09_P021791	euchromatic gene	0	0	0	0	0	0	0	0	0	0	0	0	0	0	0	0
A_09_P021796	euchromatic gene	0	0	0	0	0	0	0	0	0	0	0	0	0	0	0	0
A_09_P021801	euchromatic gene	0	0	0	0	0	0	0	0	0	0	0	0	0	0	0	0
A_09_P021806	euchromatic gene	0	0	0	0	0	0	0	0	0	0	0	0	0	0	0	0
A_09_P021811	euchromatic gene	0	0	0	0	0	0	0	0	0	0	0	0	0	0	0	0
A_09_P021816	euchromatic gene	0	0	0	0	0	0	0	0	0	0	0	0	0	0	0	0
A_09_P021821	euchromatic gene	0	0	0	0	0	0	0	0	0	0	0	0	0	0	0	0
A_09_P021826	euchromatic gene	0	0	0	0	0	0	0	0	0	0	0	0	0	0	0	0
A_09_P021831	euchromatic gene	0	0	0	0	0	0	0	0	0	0	0	0	0	0	0	0
A_09_P021836	euchromatic gene	0	0	0	0	0	0	0	0	0	0	0	0	0	0	0	0
A_09_P021841	euchromatic gene	0	0	0	0	0	0	0	0	0	0	0	0	0	0	0	0
A_09_P021846	euchromatic gene	0	0	0	0	0	0	0	0	0	0	0	0	0	0	0	0
A_09_P021851	euchromatic gene	0	0	0	0	0	0	0	0	0	0	0	0	0	0	0	0
A_09_P021856	euchromatic gene	0	0	0	0	0	0	0	0	0	0	0	0	0	0	0	0
A_09_P021861	euchromatic gene	0	0	0	0	0	0	0	0	0	0	0	0	0	0	0	0
A_09_P021866	euchromatic gene	0	0	0	0	0	0	0	0	0	0	0	0	0	0	0	0
A_09_P021871	euchromatic gene	0	0	0	0	0	0	0	0	0	0	0	0	0	0	0	0
A_09_P021876	euchromatic gene	0	0	0	0	0	0	0	0	0	0	0	0	0	0	0	0
A_09_P021881	euchromatic gene	0	0	0	0	0	0	0	0	0	0	0	0	0	0	0	0
A_09_P021886	euchromatic gene	0	0	0	0	0	0	0	0	0	0	0	0	0	0	0	0
A_09_P021891	euchromatic gene	0	0	0	0	0	0	0	0	0	0	0	0	0	0	0	0
A_09_P021896	euchromatic gene	0	0	0	0	0	0	0	0	0	0	0	0	0	0	0	0
A_09_P021901	euchromatic gene	0	0	0	0	0	0	0	0	0	0	0	0	0	0	0	0
A_09_P021911	euchromatic gene	0	0	0	0	0	0	0	0	0	0	0	0	0	0	0	0
A_09_P021916	euchromatic gene	0	0	0	0	0	0	0	0	0	0	0	0	0	0	0	0
A_09_P021921	euchromatic gene	1	0	0	0	0	0	0	0	0	0	0	0	0	0	0	0
A_09_P021926	euchromatic gene	0	0	0	0	0	0	0	0	0	0	0	0	0	0	0	0
A_09_P021931	euchromatic gene	0	0	0	0	0	0	0	0	0	0	0	0	0	0	0	0
A_09_P021936	euchromatic gene	0	0	0	0	0	0	0	1	0.5	0	0	0	0	0	0	0
A_09_P021941	euchromatic gene	0	0	0	0	0	0	0	0	0	0	0	0	0	0	0	0
A_09_P021946	euchromatic gene	0	0	0	0	0	0	0	0	0	0	0	0	0	0	0	0
A_09_P021951	euchromatic gene	0	0	0	0	0	0	0	0	0	0	0	0	0	0	0	0
A_09_P021956	euchromatic gene	0	0	0	0	0	0	0	0	0	0	0	0	0	0	0	0
A_09_P021961	euchromatic gene	0	0	0	0	0	0	1	0	0	0	0	0	0	0	0	0
A_09_P021966	euchromatic gene	0	0	0	0	0	0	0	0	0	0	0	0	0	0	0	0
A_09_P021971	euchromatic gene	0	0	0	0	0	0	0	0	0	0	0	0	0	0	0	0
A_09_P021976	euchromatic gene	0	0	0	0	0	0	0	0	0	0	0	0	0	0	0	0
A_09_P021981	euchromatic gene	0	0	0	0	0	0	0	0	0	0	0	0	0	0	0	0
A_09_P021986	euchromatic gene	0	0	0	0	0	0	0	0	0	0	0	0	0	0	0	0
A_09_P021991	euchromatic gene	0	0	0	0	0	0	0	0	0	0	0	0	0	0	0	0
A_09_P021996	euchromatic gene	0	0	0	0	0	0	0	0	0	0	0	0	0	0	0	0
A_09_P022001	euchromatic gene	0	1.5	0.5	0	0	0	0	0	0	0	0	0	0	0	0	0
A_09_P022006	euchromatic gene	0	0	0	0	0	0	0	0	0	0	0	0	0	0	0	0
A_09_P022011	euchromatic gene	0	0	0	0	0	0	0	0	0	0	0	0	0	0	0	0
A_09_P022016	euchromatic gene	0	0	0	0	0	0	0	0	0	0	0	0	0	0	0	0
A_09_P022021	euchromatic gene	0	0	0	0	0	0	0	0	0	0	0	0	0	0	0	0
A_09_P022031	euchromatic gene	0	0	0	0	0	0	0	0	0	0	0	0	0	0	0	0
A_09_P022036	euchromatic gene	0	0	0	0	0	0	0	0	0	0	0	0	0	0	0	0
A_09_P022041	euchromatic gene	0	0	0	1	0	0	0	0	0	0	0	0	0	0	0	0
A_09_P022046	euchromatic gene	0	0	0	0	0	0	0	0	0	0	0	0	0	0	0	0
A_09_P022051	euchromatic gene	0	0	0	1	1	0	0	0	0	0	0	0	0	0	0	0
A_09_P022056	euchromatic gene	0	0	0	1	0	0	0	0	0	0	0	0	0	0	0	0
A_09_P022061	euchromatic gene	0	0	0	0	0	0	0	0	0	0	0	0	0	0	0	0
A_09_P022066	euchromatic gene	0	0	0	0	0	0	0	0	0	0	0	0	0	0	0	0
A_09_P022071	euchromatic gene	0	0	0	0	0	0	0	0	0	0	0	0	0	0	0	0
A_09_P022076	euchromatic gene	0	0	0	0	0	0	0	0	0	0	0	0	0	0	0	0
A_09_P022081	euchromatic gene	0	0	0	0	0	0	0	0	0	0	0	0	0	0	0	0
A_09_P022086	euchromatic gene	0	0	0	0	0	0	0	0	0	0	0	0	0	0	0	0
A_09_P022091	euchromatic gene	0	0	0	0	0	0	0	0	0	0	0	0	0	0	0	0
A_09_P022096	euchromatic gene	0	0	0	0	0	0	0	0	0	0	0	0	0	0	0	0
A_09_P022101	euchromatic gene	0	0	0	0	0	0	0	0	0	0	0	0	0	0	0	0
A_09_P022106	euchromatic gene	0	0	0	0	0	0	0	0	0	0	0	0	0	0	0	0
A_09_P022111	euchromatic gene	0	0	0	0	0	0	0	0	0	0	0	0	0	0	0	0
A_09_P022116	euchromatic gene	0	0	0	0	0	0	0	0	0	0	0	0	0	0	0	0
A_09_P022121	euchromatic gene	0	0	0.5	0	0	0	0	0	0	0	0	0	0	0	0	0
A_09_P022126	euchromatic gene	0	0	0	0	0	0	0	0	0	0	0	0	0	0	0	0
A_09_P022136	euchromatic gene	0	0	0	0	0	0	0	0	0	0	0	0	0	0	0	0
A_09_P022141	euchromatic gene	0	0	0	0	0	0	0	0	0	0	0	0	0	0	0	0
A_09_P022146	euchromatic gene	0	0	0	0	0	0	0	0	0	0	0	0	0	0	0	0
A_09_P022151	euchromatic gene	0	0	0	0	0	0	0	0	0	0	0	0	0	0	0	0
A_09_P022156	euchromatic gene	0	0	0	0	0	0	0	0	0	0	0	0	0	0	0	0
A_09_P022161	euchromatic gene	0	0	0	0	0	0	0	0	0	0	0	0	0	0	0	0
A_09_P022166	euchromatic gene	2	0	0	3	0	0	1	0	0	0.5	0	0	0	0	0	0
A_09_P022171	euchromatic gene	0	0	0	0	0	0	0	0	0	0	0	0	0	0	0	0
A_09_P022176	euchromatic gene	0	0	0	1	0	0	0	0	0	0	0	0	0	0	0	0
A_09_P022181	euchromatic gene	0	0	0	0	0	0	0	0	0	0	0	0	0	0	0	0
A_09_P022186	euchromatic gene	0	0	0	0	0	0	0	0	0	0	0	0	0	0	0	0
A_09_P022191	euchromatic gene	0	0	0	0	0	0	0	0	0	0	0	0	0	0	0	0
A_09_P022196	euchromatic gene	0	0	0	0	0	0	0	0	0	0	0	0	0	0	0	0
A_09_P022206	euchromatic gene	0	0	0	0	0	0	0	0	0	0	0	0	0	0	0	0
A_09_P022211	euchromatic gene	0	0	0	0	0	0	0	0	0	0	0	0	0	0	0	0
A_09_P022216	euchromatic gene	0	0	0	1	0	0	0	0	0	0	0	0	0	0	0	0
A_09_P022221	euchromatic gene	0	0	0	0	0	0	1	0	0	0	0	0	0	0	0	0
A_09_P022226	euchromatic gene	0	0	0	0	0	0	0	0	0	0	0	0	0	0	0	0
A_09_P022231	euchromatic gene	0	0	0	0	0	0	0	0	0	0	0	0	0	0	0	0
A_09_P022236	euchromatic gene	0	0	0	0	0	0	0	0	0	0	0	0	0	0	0	0
A_09_P022241	euchromatic gene	0	0	0	0	0	0	0	0	0	0	0	0	0	0	0	0
A_09_P022246	euchromatic gene	0	0	0	0	0	0	0	0	0	0	0	0	0	0	0	0
A_09_P022251	euchromatic gene	0	0	0	0	0	0	0	0	0	0	0	0	0	0	0	0
A_09_P022256	euchromatic gene	0	0	0	0	0	0	0	0	0	0	0	0	0	0	0	0
A_09_P022261	euchromatic gene	0	0	0	0	0	0	0	0	0	0	0	0	0	0	0	0
A_09_P022266	euchromatic gene	0	0	0	0	0	0	0	0	0	0	0	0	0	0	0	0
A_09_P022271	euchromatic gene	0	0	0	0	0	0	0	0	0	0	0	0	0	0	0	0
A_09_P022276	euchromatic gene	0	0	0	0	0	0	0	0	0	0	0	0	0	0	0	0
A_09_P022281	euchromatic gene	0	0	0	0	0	0	0	0	0	0	0	0	0	0	0	0
A_09_P022286	euchromatic gene	0	0	0	0	0	0	0	0	0	0	0	0	0	0	0	0
A_09_P022291	euchromatic gene	0	0	0	0	0	0	0	0	0	0	0	0	0	0	0	0
A_09_P022296	euchromatic gene	0	0	0	0	0	0	0	0	0	0	0	0	0	0	0	0
A_09_P022301	euchromatic gene	0	0	0	0	0	0	0	0	0	0	0	0	0	0	0	0
A_09_P022306	euchromatic gene	0	0	0	0	0	0	0	0	0	0	0	0	0	0	0	0
A_09_P022311	euchromatic gene	0	0	0	0	0	0	0	0	0	0	0	0	0	0	0	0
A_09_P022316	euchromatic gene	0	0	0	0	0	0	0	0	0	0	0	0	0	0	0	0
A_09_P022321	euchromatic gene	0.5	0.5	0	0	1	0	0	0	0.5	0	0	0	0	0	0	0
A_09_P022326	euchromatic gene	0	0	0	0	0	0	0	0	0	0	0	0	0	0	0	0
A_09_P022331	euchromatic gene	0	0	0	0	0	0	0	0	0	0	0	0	0	0	0	0
A_09_P022336	euchromatic gene	0	0	0	0	0	0	0	0	0	0	0	0	0	0	0	0
A_09_P022341	euchromatic gene	0	0	0	0	0	0	0	0	0	0	0	0	0	0	0	0
A_09_P022346	euchromatic gene	0	0	0	0	0	0	0	0	0	0	0	0	0	0	0	0
A_09_P022351	euchromatic gene	0	0	0	0	0	0	0	0	0	0	0	0	0	0	0	0
A_09_P022356	euchromatic gene	0	0	0	0	0	0	0	0	0	0	0	0	0	0	0	0
A_09_P022361	euchromatic gene	0	0	0	0	0	0	0	0	0	0	0	0	0	0	0	0
A_09_P022366	euchromatic gene	0	0	0	0	0	0	0	0	0	0	0	0	0	0	0	0
A_09_P022371	euchromatic gene	0	0	0	0	0	0	0	0	0	0	0	0	0	0	0	0
A_09_P022376	euchromatic gene	0	0	0	0	0	0	0	0	0	0	0	0	0	0	0	0
A_09_P022381	euchromatic gene	0	0.5	0	1	0	0	1	0	0	0	0	0	0	0	0	0
A_09_P022386	euchromatic gene	0	0	0	0	0	0	0	0	0	0	0	0	0	0	0	0
A_09_P022391	euchromatic gene	0	0	0	0	0	0	0	0	0	0	0	0	0	0	0	0
A_09_P022396	euchromatic gene	0	0	0	0	0	0	0	0	0	0	0	0	0	0	0	0
A_09_P022401	euchromatic gene	0	0	0	0	0	0	0	0	0	0	0	0	0	0	0	0
A_09_P022406	euchromatic gene	0	0	0	0	0	0	0	0	0	0	0	0	0	0	0	0
A_09_P022411	euchromatic gene	0	0	0	0	0	0	0	0	0	0	0	0	0	0	0	0
A_09_P022416	euchromatic gene	0	0	0	0	0	0	0	0	0	0	0	0	0	0	0	0
A_09_P022421	euchromatic gene	0	0	0	0	0	0	0	0	0	0	0	0	0	0	0	0
A_09_P022426	euchromatic gene	0	0	0	0	0	0	0	2	0	0	0	0	0	0	0	0
A_09_P022431	euchromatic gene	0	0	0	0	0	0	0	0	0	0	0	0	0	0	0	0
A_09_P022436	euchromatic gene	0	0	0	0	0	0	0	0	0	0	0	0	0	0	0	0
A_09_P022441	euchromatic gene	0	0	0	0	0	0	0	0	0	0	0	0	0	0	0	0
A_09_P022446	euchromatic gene	0	0	0	0	0	0	0	0	0	0	0	0	0	0	0	0
A_09_P022451	euchromatic gene	0	0	0	0	0	0	0	0	0	0	0	0	0	0	0	0
A_09_P022456	euchromatic gene	0	0	0	0	0	0	0	0	0	0	0	0	0	0	0	0
A_09_P022461	euchromatic gene	0	0	0	0	0	0	0	0	0	0	0	0	0	0	0	0
A_09_P022466	euchromatic gene	0	0	0	0	0	0	0	0	0	0	0	0	0	0	0	0
A_09_P022471	euchromatic gene	0	0	0	0	0	0	0	0	0	0	0	0	0	0	0	0
A_09_P022476	euchromatic gene	0	2	0	0	0	0	0	0	0	0	0	0	0	0	0	0
A_09_P022481	euchromatic gene	0	0	0	0	0	0	0	0	0	0	0	0	0	0	0	0
A_09_P022486	euchromatic gene	0	0	0	0	0	0	0	0	0	0	0	0	0	0	0	0
A_09_P022491	euchromatic gene	0	0	0	0	0	0	0	0	0	0	0	0	0	0	0	0
A_09_P022496	euchromatic gene	0	0	0	0	0	0	0	0	0	0.5	0	0	0	0	0	0
A_09_P022501	euchromatic gene	0	0	0	0	0	0	0	0	0	0	0	0	0	0	0	0
A_09_P022506	euchromatic gene	0	0	0	0	0	0	0	0	0	0	0	0	0	0	0	0
A_09_P022511	euchromatic gene	0	0	0	0	0	0	0	0	0	0	0	0	0	0	0	0
A_09_P022516	euchromatic gene	0	0	0	0	0	0	0	0	0	0	0	0	0	0	0	0
A_09_P022521	euchromatic gene	0	0	0	0	0	0	0	0	0	0	0	0	0	0	0	0
A_09_P022526	euchromatic gene	0	0	0	0	0	0	0	0	0	0	0	0	0	0	0	0
A_09_P022531	euchromatic gene	0.5	0	0.5	0	0	0	0	0	0	0	0	0	0	0	0	0
A_09_P022536	euchromatic gene	0	0	0	0	0	0	0	0	0	0.5	0	0	0	0	0	0
A_09_P022541	euchromatic gene	0	0	0	0	0	0	0	0	0	0	0	0	0	0	0	0
A_09_P022546	euchromatic gene	0	0	0	0	0	0	0	0	0	0	0	0	0	0	0	0
A_09_P022551	euchromatic gene	0	0	0	1	0	0	0	0	0	0	0	0	0	0	0	0
A_09_P022556	euchromatic gene	0	0	0	0	0	0	0	0	0	0	0	0	0	0	0	0
A_09_P022561	euchromatic gene	0	0	0	0	0	0	0	0	0	0	0	0	0	0	0	0
A_09_P022566	euchromatic gene	0	0	0	0	0	0	0	0	0	0	0	0	0	0	0	0
A_09_P022571	euchromatic gene	0	0	0	0	0	0	0	0	0	0	0	0	0	0	0	0
A_09_P022576	euchromatic gene	0	0	0	0	0	0	0	0	0	0	0	0	0	0	0	0
A_09_P022581	euchromatic gene	0	0	0	0	0	0	0	0	0	0	0	0	0	0	0	0
A_09_P022586	euchromatic gene	0	0	0	0	0	0	0	0	0	0	0	0	0	0	0	0
A_09_P022591	euchromatic gene	0	0	0	0	0	0	0	0	0	0	0	0	0	0	0	0
A_09_P022596	euchromatic gene	0	0	0	0	1	0	3	0	0	0	0	0	0	0	0	0
A_09_P022601	euchromatic gene	0	0	0	0	0	0	0	0	0	0	0	0	0	0	0	0
A_09_P022606	euchromatic gene	0	0	0	0	0	1	0	0	0	0	0	0	0	0	0	0
A_09_P022611	euchromatic gene	0	0	0	0	0	0	0	0	0	0	0	0	0	0	0	0
A_09_P022616	euchromatic gene	0	0	0	0	0	0	0	0	0	0	2	0	0	0	0	0
A_09_P022621	euchromatic gene	0	0	0	0	0	0	0	0	0	1	0	0	0	0	0	0
A_09_P022626	euchromatic gene	0	0	0	0	0	0	0	0	0	0	0	0	0	0	0	0
A_09_P022631	euchromatic gene	8	2	0	2	6	1	2	2	0	0	0	0	0	0	0	0
A_09_P022636	euchromatic gene	0	0	0	0	0	0	0	0	0	0	0	0	0	0	0	0
A_09_P022641	euchromatic gene	0	0	0	0	0	0	0	0	0	0	0	0	0	0	0	0
A_09_P022646	euchromatic gene	0	0	0	0	0	0	0	0	0	0	0	0	0	0	0	0
A_09_P022651	euchromatic gene	0	0	0	0	0	0	0	0	0	0	0	0	0	0	0	0
A_09_P022656	euchromatic gene	0	0	0	0	0	0	0	0	0	0	0	0	0	0	0	0
A_09_P022661	euchromatic gene	0	0	0	0	0	0	0	0	0	0	0	0	0	0	0	0
A_09_P022666	euchromatic gene	0	0	0	0	0	0	0	0	0	0	0	0	0	0	0	0
A_09_P022671	euchromatic gene	0	0	0	0	0	0	0	0	0	0	0	0	0	0	0	0
A_09_P022681	euchromatic gene	0	0	0	1	0	0	0	0	0	0	0	0	0	0	0	0
A_09_P022686	euchromatic gene	0	0	0	0	0	0	0	0	0	0	0	1	0	0	0	0
A_09_P022691	euchromatic gene	0	0	0	0	0	0	0	0	0	0	0	0	0	0	0	0
A_09_P022696	euchromatic gene	0	0	0	0	0	0	0	0	0	0	0	0	0	0	0	0
A_09_P022701	euchromatic gene	0	0	0	0	0	0	0	0	0	0	0	0	0	0	0	0
A_09_P022706	euchromatic gene	0	0	0	0	0	0	0	0	0	0	0	0	0	0	0	0
A_09_P022711	euchromatic gene	0	0	0	0	0	0	0	0	0	0	0	0	0	0	0	0
A_09_P022716	euchromatic gene	0	0	0	0	0	0	0	0	0	0	0	0	0	0	0	0
A_09_P022721	euchromatic gene	0	0	0	0	0	0	0	0	0	0	0	0	0	0	0	0
A_09_P022726	euchromatic gene	0	0	0	1	0	0	0	0	0	0	0	0	0	0	0	0
A_09_P022731	euchromatic gene	0	0	0	0	0	0	0	0	0	0	0	0	0	0	0	0
A_09_P022736	euchromatic gene	0	0	0	0	0	0	0	0	0	0	0	0	0	0	0	0
A_09_P022741	euchromatic gene	0	0	0	1	0	0	0	0	0	0	0	0	0	0	0	0
A_09_P022746	euchromatic gene	0	0	0	0	0	0	0	0	0	0	0	0	0	0	0	0
A_09_P022751	euchromatic gene	0	0	0	0	0	0	0	0	0	0	0	0	0	0	0	0
A_09_P022756	euchromatic gene	0	0	0	0	0	0	0	0	0	0	0	0	0	0	0	0
A_09_P022761	euchromatic gene	107	3.5	21.5	19	7	1	5	1	0	0	0	0	0	0	0	0
A_09_P022766	euchromatic gene	0	0	0	0	0	0	0	0	0	0	0	0	0	0	0	0
A_09_P022771	euchromatic gene	0	0	0	0	0	0	0	0	0	0	0	0	0	0	0	0
A_09_P022776	euchromatic gene	0	0	0	0	0	0	0	0	0	0	0	0	0	0	0	0
A_09_P022781	euchromatic gene	0	0	0	0	0	0	0	0	0	0	0	0	0	0	0	0
A_09_P022786	euchromatic gene	0	0	0	0	0	0	0	0	0	0	0	0	0	0	0	0
A_09_P022791	euchromatic gene	0	0	0	0	0	1	0	0	0	0	0	0	0	0	0	0
A_09_P022796	euchromatic gene	0	0	0	0	0	0	0	0	0	0	0	0	0	0	0	0
A_09_P022801	euchromatic gene	0	0	0	0	0	0	0	0	0	0	0	0	0	0	0	0
A_09_P022806	euchromatic gene	0	0	0	0	0	0	0	0	0	0	0	0	0	1	0	0
A_09_P022811	euchromatic gene	0	0.5	0	0	0	0	0	0	0	0	0	0	0	0	0	0
A_09_P022816	euchromatic gene	0.5	0	0	0	0	0	0	0	0	0	0	0	0	0	0	0
A_09_P022821	euchromatic gene	0	0	0	0	0	0	0	0	0	0	0	0	0	0	0	0
A_09_P022826	euchromatic gene	0	0	0	0	0	0	0	0	0	0	0	0	0	0	0	0
A_09_P022831	euchromatic gene	0	0	0	0	0	0	0	0	0	0	0	0	0	0	0	0
A_09_P022836	euchromatic gene	0	0	0	0	0	0	0	0	0	0	0	0	0	0	0	0
A_09_P022841	euchromatic gene	0	0	0	0	0	0	0	0	0	0	0	0	0	0	0	0
A_09_P022846	euchromatic gene	0	0	0	0	0	0	0	0	0	0	0	0	0	0	0	0
A_09_P022851	euchromatic gene	0	0	0	0	0	0	1	0	0	0	0	0	0	0	0	0
A_09_P022856	euchromatic gene	0	0	0	0	0	0	0	0	0	0	0	0	0	0	0	0
A_09_P022861	euchromatic gene	0	0	0	0	0	0	0	0	0	0	0	0	0	0	0	0
A_09_P022866	euchromatic gene	0	0	0	0	0	0	0	0	0	0	0	0	0	0	0	0
A_09_P022871	euchromatic gene	0	0	0.5	0	0	0	0	0	0	0	0	0	0	0	0	0
A_09_P022876	euchromatic gene	0	0	0	0	0	0	1	0	0	0.5	0	0	0	0	0	0
A_09_P022881	euchromatic gene	0	0	0	0	0	0	0	0	0	0	0	0	0	0	0	0
A_09_P022886	euchromatic gene	0	0	0	0	0	0	0	0	0	0	0	0	0	0	0	0
A_09_P022891	euchromatic gene	0	0	0	0	0	0	0	0	0	0	0	0	0	0	0	0
A_09_P022896	euchromatic gene	0	0	0	0	0	0	0	0	0	0	0	0	0	0	0	0
A_09_P022901	euchromatic gene	0	0	0	0	0	0	0	0	0	0	0	0	0	0	0	0
A_09_P022906	euchromatic gene	0	0	0	0	0	0	0	0	0	0	0	0	0	0	0	0
A_09_P022911	euchromatic gene	0	0	0	0	0	0	0	0	0	0	0	0	0	0	0	0
A_09_P022916	euchromatic gene	0	0	0	0	0	0	0	0	0	0	0	0	0	0	0	0
A_09_P022921	euchromatic gene	0	0	0	0	0	0	0	0	0	0	0	0	0	0	0	0
A_09_P022926	euchromatic gene	0	0	0	0	0	0	0	0	0	0	0	0	0	0	0	0
A_09_P022931	euchromatic gene	0	0	0	0	1	0	0	0	0	0	0	0	0	0	0	0
A_09_P022936	euchromatic gene	0	0	0	1	0	0	0	0	0	0	0	0	0	0	0	0
A_09_P022941	euchromatic gene	0	0	0	0	0	0	0	0	0	0	0	0	0	0	0	0
A_09_P022946	euchromatic gene	0	0	0	0	0	0	0	0	0	0	0	0	0	0	0	0
A_09_P022951	euchromatic gene	0	0	0	0	0	0	0	0	0	0	0	0	0	0	0	0
A_09_P022956	euchromatic gene	0	0	0	1	0	0	0	0	0	0	0	0	0	0	0	0
A_09_P022961	euchromatic gene	0	0.5	0	0	0	0	1	0	0	0	0	0	0	0	0	0
A_09_P022966	euchromatic gene	0	0	0	0	0	0	0	0	0	0	0	0	0	0	0	0
A_09_P022971	euchromatic gene	0	0	0	0	0	0	0	0	0	0	0	0	0	0	0	0
A_09_P022976	euchromatic gene	0	0	0	0	0	0	0	0	0	0	0	0	0	0	0	0
A_09_P022981	euchromatic gene	0	0	0	0	0	0	0	0	0	0	0	0	0	0	0	0
A_09_P022986	euchromatic gene	0	0	0	0	0	0	0	0	0	0	0	0	0	0	0	0
A_09_P022991	euchromatic gene	0	0	0	0	0	0	0	0	0	0	0	0	0	0	0	0
A_09_P022996	euchromatic gene	0	0	0	0	0	0	0	0	0	0	0	0	0	0	0	0
A_09_P023001	euchromatic gene	0	0	0	0	0	0	0	0	0	0	0	0	0	0	0	0
A_09_P023006	euchromatic gene	0	0	0	0	0	0	0	0	0	0	0	0	0	0	0	0
A_09_P023011	euchromatic gene	0	0	0	0	0	0	0	0	0	0	0	0	0	0	0	0
A_09_P023016	euchromatic gene	0	0	0	0	0	0	0	0	0	0	0	0	0	0	0	0
A_09_P023021	euchromatic gene	0	0	0	0	0	0	0	0	0	0	0	0	0	0	0	0
A_09_P023026	euchromatic gene	0	0	0	0	0	0	0	0	0	0	0	0	0	0	0	0
A_09_P023031	euchromatic gene	0	0.5	0	0	0	0	0	0	0	0	0	0	0	0	0	0
A_09_P023036	euchromatic gene	0	0	0	0	0	0	0	0	0	0	0	0	0	0	0	0
A_09_P023041	euchromatic gene	0	0	0	0	0	0	0	0	0	0	0	0	0	0	0	0
A_09_P023046	euchromatic gene	0	0	0	0	0	0	0	0	0	0	0	0	0	0	0	0
A_09_P023051	euchromatic gene	0	0	0	0	0	0	0	0	0	0	0	0	0	0	0	0
A_09_P023061	euchromatic gene	0	0	0	0	0	0	0	0	0	0	0	0	0	0	0	0
A_09_P023066	euchromatic gene	0	0	0	0	1	0	1	0	0	0	0	0	0	0	0	0
A_09_P023071	euchromatic gene	0	0	0	0	0	0	0	0	0	0	0	0	0	0	0	0
A_09_P023076	euchromatic gene	0	0	0	0	0	0	0	0	0	0	0	0	0	0	0	0
A_09_P023081	euchromatic gene	0	0	0	0	0	0	0	0	0	0	0	0	0	0	0	0
A_09_P023086	euchromatic gene	0	0	0	0	0	0	0	0	0	0	0	0	0	0	0	0
A_09_P023091	euchromatic gene	0	0	0	0	0	0	0	0	0	0	0	0	0	0	0	0
A_09_P023096	euchromatic gene	0	0	0	0	0	0	0	0	0	0	0	0	0	0	0	0
A_09_P023101	euchromatic gene	0	0	0	0	0	0	0	0	0	0	0	0	0	0	0	0
A_09_P023106	euchromatic gene	0	0	0	0	0	0	0	0	0	0	0	0	0	0	0	0
A_09_P023111	euchromatic gene	0	0	0	0	0	0	0	0	0	0	0	0	0	0	0	0
A_09_P023116	euchromatic gene	0	0	0	0	0	0	0	0	0	0	0	0	0	0	0	0
A_09_P023122	euchromatic gene	0	0	0	0	0	0	0	0	0	0	0	0	0	0	0	0
A_09_P023126	euchromatic gene	0	0	0	0	0	0	0	0	0	0	0	0	0	0	0	0
A_09_P023131	euchromatic gene	0	0	0	0	0	0	0	0	0	0	0	0	0	0	0	0
A_09_P023136	euchromatic gene	0	0	0	0	0	1	0	0	0	0	0	0	0	0	0	1
A_09_P023141	euchromatic gene	0	0	0	0	0	1	0	0	0	0	0	0	0	0	0	0
A_09_P023146	euchromatic gene	0	0	0	0	0	0	0	0	0	0	0	0	0	0	0	0
A_09_P023151	euchromatic gene	0	0	0	0	0	0	0	0	0	0	0	0	0	0	0	0
A_09_P023156	euchromatic gene	0	0	0	0	0	0	0	0	0	0	0	0	0	0	0	0
A_09_P023161	euchromatic gene	0	0	0	0	0	0	0	0	0	0	0	0	0	0	0	0
A_09_P023166	euchromatic gene	0	0	0	0	0	0	0	0	0	0	0	0	0	0	0	0
A_09_P023171	euchromatic gene	0	0	0	0	0	0	0	0	0	0	0	0	0	0	0	0
A_09_P023176	euchromatic gene	0	0	0	0	0	0	0	0	0	0	0	0	0	0	0	0
A_09_P023181	euchromatic gene	0	0	0	0	0	0	0	0	0	0	0	0	0	0	0	0
A_09_P023186	euchromatic gene	0	0	0	0	0	0	0	0	0	0	0	0	0	0	0	0
A_09_P023191	euchromatic gene	0	0	0	0	0	0	0	0	0	0	0	0	0	0	0	0
A_09_P023196	euchromatic gene	0.5	0	0	0	0	0	0	0	0	0	0	0	0	0	0	0
A_09_P023201	euchromatic gene	0	0	0	0	0	0	0	0	0	0	0	0	0	0	0	0
A_09_P023206	euchromatic gene	0	0	0	0	0	0	0	0	0	0	0	0	0	0	0	0
A_09_P023211	euchromatic gene	0	0	0	0	0	0	0	0	0	0	0	0	0	0	0	0
A_09_P023216	euchromatic gene	0	0	0	0	1	0	0	0	0	0	0	0	0	0	0	0
A_09_P023221	euchromatic gene	0	0.5	0	0	0	0	0	0	0	0	0	0	0	0	0	0
A_09_P023226	euchromatic gene	0	0	0	0	0	0	0	0	0	0	0	0	0	0	0	0
A_09_P023231	euchromatic gene	0	0	0	0	0	0	0	0	0	0	0	0	0	0	0	0
A_09_P023236	euchromatic gene	0	0	0	0	0	0	0	0	0	0	0	0	0	0	0	0
A_09_P023241	euchromatic gene	0	0	0	0	0	0	0	0	0	0	0	0	0	0	0	0
A_09_P023246	euchromatic gene	0	0	0	0	0	1	0	0	0	0	0	0	0	0	0	0
A_09_P023251	euchromatic gene	0	0	0	0	1	0	0	0	0	0	0	0	0	0	0	0
A_09_P023256	euchromatic gene	0	0	0	0	0	0	0	0	0	0	0	0	0	0	0	0
A_09_P023261	euchromatic gene	0	0	0	0	1	0	0	0	0	0	0	0	0	0	0	0
A_09_P023266	euchromatic gene	0	0	0	0	0	0	0	0	0	0	0	0	0	0	0	0
A_09_P023271	euchromatic gene	0	0	0	0	0	0	0	0	0	0	0	0	0	0	0	0
A_09_P023276	euchromatic gene	0	0	0	0	0	0	0	0	0	0	0	0	0	0	0	0
A_09_P023281	euchromatic gene	0	0	0	0	0	0	0	0	0	0	0	0	0	0	0	0
A_09_P023286	euchromatic gene	0	0	0	0	0	1	0	0	0	0	0	0	0	0	0	0
A_09_P023291	euchromatic gene	0	0	0	0	1	0	0	0	0	0	0	0	0	0	0	0
A_09_P023296	euchromatic gene	0	0	0	0	0	0	0	0	0	0	0	0	0	0	0	0
A_09_P023301	euchromatic gene	0	0	0	0	0	0	0	0	0	0	0	0	0	0	0	0
A_09_P023306	euchromatic gene	0	0	0	0	0	0	0	0	0	0	0	0	0	0	0	0
A_09_P023311	euchromatic gene	0	0	2.5	0	0	0	0	0	0	0	0	0	0	0	0	0
A_09_P023316	euchromatic gene	0	0	0	0	0	0	0	0	0	0	0	0	0	0	0	0
A_09_P023321	euchromatic gene	0	0	0	0	0	0	0	0	0	0	0	0	0	0	1	0
A_09_P023326	euchromatic gene	0	0	0	0	0	0	0	0	0	0	0	0	0	0	0	0
A_09_P023331	euchromatic gene	0	0	0	2	0	0	0	0	0	0	0	0	0	0	0	0
A_09_P023336	euchromatic gene	0	0	0	0	0	0	0	0	0	0	0	0	0	0	0	0
A_09_P023341	euchromatic gene	0	0	0	0	0	0	0	0	0	0	0	0	0	0	0	0
A_09_P023346	euchromatic gene	0	0	0	0	0	0	0	0	0	0	0	0	0	0	0	0
A_09_P023351	euchromatic gene	0	0	0	0	0	0	0	0	0	0	0	0	0	0	0	0
A_09_P023356	euchromatic gene	0	0	0	0	0	0	0	0	0	0	0	0	0	0	0	0
A_09_P023361	euchromatic gene	0	0	0	0	0	0	0	0	0	0	0	0	0	0	0	0
A_09_P023366	euchromatic gene	0	0	0	0	0	0	0	0	0	0	0	0	0	0	0	0
A_09_P023371	euchromatic gene	0	0	0	0	0	0	0	0	0	0	0	0	0	0	0	0
A_09_P023381	euchromatic gene	0	0	0	0	0	0	0	0	0	0	0	0	0	0	0	0
A_09_P023386	euchromatic gene	0	0	0	0	0	0	0	0	0	0	0	0	0	0	0	0
A_09_P023391	euchromatic gene	0	0	0	0	0	0	0	0	0	0	0	0	0	0	0	0
A_09_P023396	euchromatic gene	0	0	0	0	0	0	0	0	0	0	0	0	0	0	0	0
A_09_P023401	euchromatic gene	0	0	0	0	0	0	0	0	0	0	0	0	0	0	0	0
A_09_P023411	euchromatic gene	0	0	0	0	0	0	0	0	0	0	0	0	0	0	0	0
A_09_P023416	euchromatic gene	0	0	0	0	0	0	0	0	0	0	0	0	0	0	0	0
A_09_P023421	euchromatic gene	0	0	0	0	0	0	0	0	0	0	0	0	0	0	0	0
A_09_P023426	euchromatic gene	0	0	0	1	0	0	0	0	0	0	0	0	0	0	0	0
A_09_P023431	euchromatic gene	0	0	0	1	1	0	1	0	0	0	0	0	0	0	0	0
A_09_P023436	euchromatic gene	0	0	0	0	0	0	0	0	0	0	0	0	0	0	0	0
A_09_P023441	euchromatic gene	0	0	0	0	0	0	0	0	0	0	0	0	0	0	0	0
A_09_P023446	euchromatic gene	0	0	0	0	0	0	0	0	0	0	0	0	0	0	0	0
A_09_P023451	euchromatic gene	0	0	0	1	0	1	0	0	0	0	0	0	0	0	0	0
A_09_P023456	euchromatic gene	0	0	0	0	0	0	0	0	0	0	0	0	0	0	0	0
A_09_P023461	euchromatic gene	0	0	0	0	0	0	0	0	0	0	0	0	0	0	0	0
A_09_P023466	euchromatic gene	0	0	0	0	0	0	0	0	0	0	0	0	0	0	0	0
A_09_P023471	euchromatic gene	0	0	0	0	0	0	0	0	0	0	0	0	0	0	0	0
A_09_P023476	euchromatic gene	0	0	0	0	0	0	0	0	0	0	0	0	0	0	0	0
A_09_P023481	euchromatic gene	0	0	0	0	0	0	0	0	0	0	0	0	0	0	0	0
A_09_P023486	euchromatic gene	0	0	0	0	0	0	0	0	0	0	0	0	0	0	0	0
A_09_P023491	euchromatic gene	0	0	0	0	0	0	0	0	0	0	0	0	0	0	0	0
A_09_P023496	euchromatic gene	0	0.5	0	0	0	0	0	0	0	0	0	0	0	0	0	0
A_09_P023501	euchromatic gene	0	0	0	0	0	0	0	0	0	0	0	0	0	0	0	0
A_09_P023506	euchromatic gene	0	0	0	0	0	0	0	0	0	0	0	0	0	0	0	0
A_09_P023511	euchromatic gene	0	0	0	0	0	0	0	0	0	0	0	0	0	0	0	0
A_09_P023521	euchromatic gene	0	0	0	0	0	0	0	0	0	0	0	0	0	0	0	0
A_09_P023526	euchromatic gene	0	0	0	0	0	0	0	0	0	0	0	0	0	0	0	0
A_09_P023531	euchromatic gene	0	0	0	0	0	0	0	0	0	0	0	0	0	0	0	0
A_09_P023536	euchromatic gene	0	0	0	0	0	0	0	0	0	0	0.5	0	3	0	0	0
A_09_P023541	euchromatic gene	0	0	0	0	0	0	0	0	0	0	0	0	0	0	0	0
A_09_P023546	euchromatic gene	0	0	0	0	0	0	0	0	0	0	0	0	0	0	0	0
A_09_P023551	euchromatic gene	0	0	0	0	0	0	0	1	0	0	0	0	0	0	0	0
A_09_P023556	euchromatic gene	0	0	0	0	0	0	0	0	0	0	0	0	0	0	0	0
A_09_P023561	euchromatic gene	0	0	0	0	0	0	0	0	0	0	0	0	0	0	0	0
A_09_P023566	euchromatic gene	0	0	0	0	1	0	0	0	0	0	0	0	0	0	0	0
A_09_P023571	euchromatic gene	0	0	0	0	0	0	0	0	0	0	0	0	0	0	0	0
A_09_P023576	euchromatic gene	0	0	0	0	0	0	0	0	0	0	0	0	0	0	0	0
A_09_P023581	euchromatic gene	0	0	0	0	0	0	0	0	0	0	0	0	0	0	0	0
A_09_P023586	euchromatic gene	0	0	0	0	0	0	0	0	0	0	0	0	0	0	0	0
A_09_P023591	euchromatic gene	0	0	0	0	0	0	0	0	0	0	0	0	0	0	0	0
A_09_P023596	euchromatic gene	0	0	0	0	0	0	0	0	0	0	0	0	0	0	0	0
A_09_P023601	euchromatic gene	0	0	0	0	0	0	0	0	0	0	0	0	0	0	0	0
A_09_P023606	euchromatic gene	0	0	0	0	0	0	0	0	0	0	0	0	0	0	0	0
A_09_P023611	euchromatic gene	0	0	0	0	0	0	0	0	0	0	0	0	0	0	0	0
A_09_P023616	euchromatic gene	0	0	0	0	0	0	0	0	0	0	0	1	0	0	0	0
A_09_P023621	euchromatic gene	0	0	0	0	0	0	0	0	0	0	0	0	0	0	0	0
A_09_P023626	euchromatic gene	0	0	0	0	0	0	0	0	0	0	0	0	0	0	0	0
A_09_P023631	euchromatic gene	0	0	0	0	0	0	0	0	0	0	0	0	0	0	0	0
A_09_P023636	euchromatic gene	3	0	0	0	3	0	2	0	0	0	0	0	0	0	0	0
A_09_P023641	euchromatic gene	0	0	0	0	0	0	0	0	0	0	0	0	0	0	0	0
A_09_P023646	euchromatic gene	0	0	0	0	0	0	0	0	0	0	0	0	0	0	0	0
A_09_P023651	euchromatic gene	0	0	0	0	0	0	0	0	0	0	0	0	0	0	0	0
A_09_P023656	euchromatic gene	0	0	0	0	0	0	0	0	0	0	0	0	0	0	0	0
A_09_P023661	euchromatic gene	0	0	0	0	0	0	0	0	0	0	0	0	0	0	0	0
A_09_P023666	euchromatic gene	0	0	0	0	0	0	0	0	0	0	0	0	0	0	0	0
A_09_P023671	euchromatic gene	0	0	0	0	0	0	0	0	0	0	0	0	0	0	0	0
A_09_P023676	euchromatic gene	0	0	0.5	0	0	0	0	0	0	0	0	0	0	0	0	0
A_09_P023681	euchromatic gene	0	0	0	0	0	0	0	0	0	0	0	0	0	0	0	0
A_09_P023686	euchromatic gene	0	0	0	0	0	0	0	0	0	0	0	0	0	0	0	0
A_09_P023691	euchromatic gene	0	0	0	0	0	0	0	0	0	0	0	0	0	0	0	0
A_09_P023696	euchromatic gene	0	0	0	0	0	0	0	0	0	0	0	0	0	0	0	0
A_09_P023701	euchromatic gene	0	0	0	0	0	0	0	0	0.5	1.5	1.5	0	0	0	0	0
A_09_P023706	euchromatic gene	1	0.5	0.5	0	0	0	0	0	5	6	3.5	0	0	0	0	0
A_09_P023711	euchromatic gene	0	0	0	0	0	0	0	0	0	0	0	0	0	0	0	0
A_09_P023716	euchromatic gene	0	0	0	0	0	0	0	0	0	0	0	0	0	0	0	0
A_09_P023721	euchromatic gene	0	0	0	0	1	0	0	0	0	0	0	0	0	0	0	0
A_09_P023726	euchromatic gene	0	0	0	0	0	0	0	0	0	0	0	0	0	0	0	0
A_09_P023731	euchromatic gene	0	0	0	0	0	0	0	0	0	0	0	0	0	0	0	0
A_09_P023736	euchromatic gene	0	0	0	0	0	0	0	0	0	0	0	0	0	0	0	0
A_09_P023741	euchromatic gene	0	0	0	0	0	0	0	0	0	0	0	0	0	0	0	0
A_09_P023746	euchromatic gene	0	0	0	0	0	0	0	0	0	0	0	0	0	0	0	0
A_09_P023751	euchromatic gene	0	0	0	0	0	0	0	0	0	0	0	0	0	0	0	0
A_09_P023756	euchromatic gene	0	0	0	0	0	0	0	0	0	0	0	0	0	0	0	0
A_09_P023761	euchromatic gene	0	0	0	0	0	0	0	0	3.5	2	4	0	1	0	0	0
A_09_P023766	euchromatic gene	0	0	0	0	0	0	0	0	0	0	0	0	0	0	0	0
A_09_P023771	euchromatic gene	0.5	0	0	0	0	0	0	0	0	0	0	0	0	0	0	0
A_09_P023776	euchromatic gene	0	0	0	0	0	0	0	0	0	0	0	0	0	0	0	0
A_09_P023781	euchromatic gene	0	0	0	0	0	0	0	0	0	0	0	0	0	0	0	0
A_09_P023786	euchromatic gene	0	0	0	0	0	0	0	0	0	0	0	0	0	0	0	0
A_09_P023791	euchromatic gene	0	0	0	0	0	0	0	0	0	0	0	0	0	0	0	0
A_09_P023796	euchromatic gene	0	0	0	0	0	0	0	0	0	0	0	0	0	0	0	0
A_09_P023801	euchromatic gene	0	0	0	0	0	0	0	0	0	0	0	0	0	0	0	0
A_09_P023806	euchromatic gene	0	0	0	0	0	0	0	0	0	0	0	0	0	0	0	0
A_09_P023811	euchromatic gene	0	0	0	0	0	0	0	0	0	0	0	0	0	0	0	0
A_09_P023816	euchromatic gene	0	0	0	0	0	0	0	0	0	0	0	0	0	0	0	0
A_09_P023821	euchromatic gene	0	0	0	0	0	0	0	0	0	0	0.5	2	0	0	0	0
A_09_P023826	euchromatic gene	0	0	0	2	0	0	0	0	0	0	0	1	0	0	0	0
A_09_P023831	euchromatic gene	0	0	0	0	0	0	0	0	0	0	0	0	0	0	0	0
A_09_P023836	euchromatic gene	0	0	0	1	0	0	0	0	0	0	0	0	0	0	0	0
A_09_P023841	euchromatic gene	0	0	0	0	0	0	0	0	0	0	0	0	0	0	0	0
A_09_P023846	euchromatic gene	0	0	0	0	0	0	0	0	0	0	0	0	0	0	0	0
A_09_P023851	euchromatic gene	1	0	0.5	1	1	0	0	0	0	0	0	0	0	0	0	0
A_09_P023856	euchromatic gene	0	0	0	0	0	0	0	0	0	0	0	0	0	0	0	0
A_09_P023861	euchromatic gene	0	0	0	0	0	0	0	0	0	0	0	0	0	0	0	0
A_09_P023866	euchromatic gene	0	0	0	0	0	0	0	0	0	0	0	0	0	0	0	0
A_09_P023871	euchromatic gene	0	0	0	0	0	0	0	0	0	0	0	0	0	0	0	0
A_09_P023876	euchromatic gene	0	0	0	0	0	0	0	0	0	0	0	0	0	0	0	0
A_09_P023881	euchromatic gene	0	0	0	0	0	0	0	0	0	0	0	0	0	0	0	0
A_09_P023886	euchromatic gene	0	0	0	0	0	0	0	0	0	0	0	0	0	0	0	0
A_09_P023891	euchromatic gene	0	0	0	0	0	0	0	0	0	0	0	0	0	0	0	0
A_09_P023896	euchromatic gene	0	0	0	0	0	0	0	0	0	0	0	0	0	0	0	0
A_09_P023901	euchromatic gene	0	0	0	0	0	0	0	0	0	0	0	0	0	0	0	0
A_09_P023906	euchromatic gene	0	0	0	0	0	0	0	0	0	0	0	0	0	0	0	0
A_09_P023911	euchromatic gene	0	0	0	0	0	0	0	0	0	0	0	0	0	0	0	0
A_09_P023916	euchromatic gene	0	0	0	0	0	0	0	0	0	0	0	0	0	0	0	0
A_09_P023921	euchromatic gene	0	0	0	0	0	0	0	0	0	0	0	0	0	0	0	0
A_09_P023926	euchromatic gene	0	0	0	0	0	0	0	0	0	0	0	0	0	0	0	0
A_09_P023931	euchromatic gene	0	0	0	0	0	0	0	0	0	0	0	0	0	0	0	0
A_09_P023936	euchromatic gene	0	0	0	0	0	0	0	0	0	0	0	0	0	0	0	0
A_09_P023941	euchromatic gene	0	0	0	0	0	0	0	0	0	0	0	0	0	0	0	0
A_09_P023946	euchromatic gene	0	0	0	1	0	0	0	0	0	0	0	0	0	0	0	0
A_09_P023951	euchromatic gene	0	0	0	0	0	0	0	0	0	0	0	0	0	0	0	0
A_09_P023956	euchromatic gene	0	0	0	0	0	0	0	0	0	0	0	0	0	0	0	0
A_09_P023961	euchromatic gene	0	0	0	0	0	0	0	0	0	0	0	0	0	0	0	0
A_09_P023966	euchromatic gene	0	0.5	0	1	0	0	0	0	0	0	0	0	0	0	0	0
A_09_P023971	euchromatic gene	0	0	0	0	0	0	0	0	0	0.5	0	1	0	0	0	0
A_09_P023976	euchromatic gene	0	0	0	0	0	0	0	0	0	0	0	0	0	0	0	0
A_09_P023981	euchromatic gene	0	0	0	0	0	0	0	0	0	0	0	0	0	0	0	0
A_09_P023986	euchromatic gene	0	0	0	0	0	0	0	0	0	0	0	0	0	0	0	0
A_09_P023991	euchromatic gene	0	0	0	0	0	0	0	0	0	0	0	0	0	0	0	0
A_09_P023996	euchromatic gene	0	0	0	0	0	0	0	0	0	0	0	0	0	0	0	0
A_09_P024001	euchromatic gene	0	0	0	0	0	0	0	0	0	0	0	0	0	0	0	0
A_09_P024011	euchromatic gene	0	0	0	0	0	0	0	0	0	0	0	0	0	0	0	0
A_09_P024016	euchromatic gene	0	0	0	0	0	0	0	0	0	0	0	0	0	0	0	0
A_09_P024026	euchromatic gene	0	0	0	0	0	0	0	0	0	0	0	0	0	0	0	0
A_09_P024031	euchromatic gene	0	0	0	1	0	0	1	0	0	0	0	0	0	0	0	0
A_09_P024036	euchromatic gene	0	0	0	0	0	0	0	0	0	0	0	0	0	0	0	0
A_09_P024041	euchromatic gene	0	0	0	0	0	0	0	0	0	0	0	0	0	0	0	0
A_09_P024046	euchromatic gene	1	0.5	0	0	1	0	0	0	0	0	0	0	0	0	0	0
A_09_P024051	euchromatic gene	0	0	0	0	0	0	0	0	0	0	0	0	0	0	0	0
A_09_P024056	euchromatic gene	0	0	0	0	0	0	0	0	0	0	0	0	0	0	0	0
A_09_P024061	euchromatic gene	0	0	0	0	0	0	0	0	0	0	0	0	0	0	0	0
A_09_P024071	euchromatic gene	0.5	0	0	0	0	0	0	0	0	0	0	0	0	0	0	0
A_09_P024076	euchromatic gene	0	0	0	0	0	0	0	0	0	0	0	0	0	0	0	0
A_09_P024081	euchromatic gene	0	0	0	0	0	0	0	0	0	0	0	0	0	0	0	0
A_09_P024086	euchromatic gene	0	0	0	0	0	0	0	0	0	0	0	0	0	0	0	0
A_09_P024091	euchromatic gene	0	0	0	0	0	0	0	0	0	0	0	0	0	0	0	0
A_09_P024096	euchromatic gene	0	0	0	0	0	0	0	0	0	0	0	0	0	0	0	0
A_09_P024101	euchromatic gene	0	0	0	0	0	0	0	0	0	0	0	0	0	0	0	0
A_09_P029426	euchromatic gene	0	0	0	0	1	0	0	0	0	0	0	0	0	0	0	0
A_09_P029431	euchromatic gene	0	0	0	0	0	0	0	0	0	0	0	0	0	0	0	0
A_09_P029441	euchromatic gene	0	0	0	0	0	0	0	0	0	0	0	0	0	0	0	0
A_09_P029466	euchromatic gene	0	0	0	0	0	0	0	0	0	0	0	0	0	0	0	0
A_09_P029471	euchromatic gene	0	0	0	0	0	0	0	0	0	0	0	0	0	0	0	0
A_09_P029496	euchromatic gene	0.5	0	0	0	2	0	0	0	0	0	0	0	0	0	0	0
A_09_P029586	euchromatic gene	0	0	0	0	0	0	0	0	0	0	0	0	0	0	0	0
A_09_P029591	euchromatic gene	0	0	0	1	0	0	0	0	0	0	0	0	0	0	0	0
A_09_P029616	euchromatic gene	0	0	0	1	0	0	0	0	0	0	0	0	0	0	0	0
A_09_P029651	euchromatic gene	0	0	0	1	0	0	0	0	0.5	0	0	1	0	0	0	0
A_09_P029661	euchromatic gene	0	0	0	0	0	0	0	0	0	0	0	0	0	0	0	0
A_09_P029686	euchromatic gene	0	0	0	0	0	0	0	0	0	0	0	0	0	0	0	0
A_09_P029831	euchromatic gene	0	0	0	0	0	0	0	0	0	0	0	0	0	0	0	0
A_09_P029836	euchromatic gene	0	0	0	0	0	0	0	0	0	0	0	0	0	0	0	0
A_09_P029931	euchromatic gene	0	0	0	0	0	0	0	0	0	0	0	0	0	0	0	0
A_09_P030046	euchromatic gene	0	0	0	0	0	0	0	0	0	0	0	0	0	0	0	0
A_09_P030091	euchromatic gene	0.5	0	0	0	0	0	0	0	0	0	0	0	0	0	0	0
A_09_P030156	euchromatic gene	0	0	0	0	0	0	0	0	0	0	0	0	0	0	0	0
A_09_P030176	euchromatic gene	0	0	0	0	0	0	0	0	0	0	0	0	0	0	0	0
A_09_P030181	euchromatic gene	0	0	0	0	0	0	0	0	0	0	0	0	0	0	0	0
A_09_P030186	euchromatic gene	0	0	0	0	0	0	0	0	0	0	0	0	0	0	0	0
A_09_P030216	euchromatic gene	0	0	0	0	0	0	0	0	0	0	0	0	0	0	0	0
A_09_P030226	euchromatic gene	0	0	0	0	0	0	0	0	0	0	0	0	0	0	0	0
A_09_P030296	euchromatic gene	0	0	0	0	0	0	0	0	0	0	0	0	0	0	0	0
A_09_P030301	euchromatic gene	0	0	0	0	0	0	0	0	0	0	0	0	0	0	0	0
A_09_P030311	euchromatic gene	0	0	0	0	0	0	0	0	0	0	0	0	0	0	0	0
A_09_P030321	euchromatic gene	0	0	0	0	1	2	1	0	0	0	0	0	0	0	0	0
A_09_P030381	euchromatic gene	0.5	0	0	0	0	0	1	0	0	0	0	0	0	0	0	0
A_09_P030386	euchromatic gene	0	0	0	0	0	0	0	0	0	0	0	0	0	0	0	0
A_09_P030391	euchromatic gene	0	0	0	0	0	0	0	0	0	0	0	0	0	0	0	0
A_09_P030461	euchromatic gene	0	0	0	0	0	0	0	0	0	0	1	0	1	1	0	0
A_09_P030506	euchromatic gene	4	0.5	0	0	8	0	12	0	0	0	0	0	0	0	0	0
A_09_P030526	euchromatic gene	0	0	0	0	0	0	0	0	0	0	0	0	0	0	0	0
A_09_P030631	euchromatic gene	0	0	0	0	0	0	0	0	0	0	1	0	0	0	0	0
A_09_P030701	euchromatic gene	0	0	0	0	0	0	0	0	0	0	0	0	0	0	0	0
A_09_P030711	euchromatic gene	0	0	0	0	0	0	0	0	0	0	0	0	0	0	0	0
A_09_P030716	euchromatic gene	0	0	0	0	0	0	0	0	0	0	0	0	0	0	0	0
A_09_P030746	euchromatic gene	0	0	0	0	0	0	0	0	0	0	0	0	0	0	0	0
A_09_P030791	euchromatic gene	0	0	0	0	0	0	0	0	0	0	0	0	0	0	0	0
A_09_P030801	euchromatic gene	0	0	0	0	0	0	0	0	0	0	0	0	0	0	0	0
A_09_P030806	euchromatic gene	0	0	0	0	0	0	0	0	0	0	0	0	0	0	0	0
A_09_P030811	euchromatic gene	0	0	0	0	0	0	0	0	0	0	0	0	0	0	0	0
A_09_P030816	euchromatic gene	0	0	0	0	1	0	0	0	0	0	0	0	0	0	0	0
A_09_P030826	euchromatic gene	0	0	0	0	0	0	0	0	0	0	0	0	0	0	0	0
A_09_P030831	euchromatic gene	0	0	0	0	0	0	0	0	0	0	0	0	0	0	0	0
A_09_P030866	euchromatic gene	0	0	0	0	0	0	0	0	0	0	0	0	0	0	0	0
A_09_P030871	euchromatic gene	0.5	0	0	0	0	0	0	0	0	0	0	0	0	0	0	0
A_09_P030906	euchromatic gene	0	0	0	0	0	0	0	0	0	0	0	0	0	0	0	0
A_09_P030916	euchromatic gene	0	0	0	0	0	0	0	0	0	0	0	0	0	0	0	0
A_09_P030946	euchromatic gene	0	0	0	0	0	0	0	0	0	0	0	0	0	0	0	0
A_09_P031006	euchromatic gene	0	0	0	0	0	0	0	0	0	0	0	0	0	0	0	0
A_09_P031041	euchromatic gene	0	0	0	0	0	0	0	0	0	0	0	0	0	0	0	0
A_09_P031056	euchromatic gene	0	0	0	0	0	0	0	0	0	0	0	0	0	0	0	0
A_09_P031096	euchromatic gene	0	0	0	0	0	0	0	0	0	0	0	0	0	0	0	0
A_09_P031106	euchromatic gene	0	0	0	0	0	0	0	0	0	0	0	0	0	0	0	0
A_09_P031126	euchromatic gene	0	0	0	0	0	0	0	0	0	0	0	0	0	0	0	0
A_09_P031131	euchromatic gene	0	0	0	0	0	0	0	0	0	0	0	0	0	0	0	0
A_09_P031151	euchromatic gene	1	2.5	1	2	1	0	4	0	0	0	0	0	0	0	0	0
A_09_P031161	euchromatic gene	0	0	0	1	2	0	2	0	0	0	0	0	0	0	0	0
A_09_P031186	euchromatic gene	0	0	0	0	0	0	0	0	0	0	0	0	0	0	0	0
A_09_P031191	euchromatic gene	0	0	0	0	1	0	0	0	0	0	0	0	0	0	0	0
A_09_P031206	euchromatic gene	0	0	0	0	0	0	0	0	0	0	0	0	0	0	0	0
A_09_P031211	euchromatic gene	0	0	0	0	0	0	0	0	0	0	0	0	0	0	0	0
A_09_P031236	euchromatic gene	0	0	0	1	0	0	0	0	0	0	0	0	0	0	0	0
A_09_P031261	euchromatic gene	0	0	0	0	0	0	0	0	0	0	0	0	0	0	0	0
A_09_P031276	euchromatic gene	0	0	0	0	0	0	0	0	0	0	0	0	0	0	0	0
A_09_P031286	euchromatic gene	0	0	0	0	0	0	0	0	0	0	0	0	0	0	0	0
A_09_P031306	euchromatic gene	0	0	0	0	0	0	0	0	0	0	0	0	0	0	0	0
A_09_P031331	euchromatic gene	0	0	0	0	0	0	0	0	0	0	0	1	0	0	0	0
A_09_P031361	euchromatic gene	0	0	0	0	0	0	0	0	0	0	0	0	0	0	0	0
A_09_P031376	euchromatic gene	0	0	0	1	0	0	0	0	0	0	0	0	0	0	0	0
A_09_P031416	euchromatic gene	0	0	0	0	0	0	0	0	0	0	0	0	0	0	0	0
A_09_P031466	euchromatic gene	0	0	0	0	0	0	0	0	0	0	0	0	0	0	0	0
A_09_P031486	euchromatic gene	0.5	0	0	0	0	0	0	0	0	0	0	0	0	0	0	0
A_09_P031491	euchromatic gene	0	0	0	0	0	0	0	0	0	0	0	0	0	0	0	0
A_09_P031521	euchromatic gene	0	0	0	0	0	0	0	0	0	0	0	0	0	0	0	0
A_09_P031541	euchromatic gene	0	0	0	0	0	0	0	0	0	0	0	0	0	0	0	0
A_09_P031556	euchromatic gene	0	0	0	0	0	0	0	0	0	0	0	0	0	0	0	0
A_09_P031566	euchromatic gene	0	0	0	0	0	0	0	0	0	0	0	0	0	0	0	0
A_09_P031616	euchromatic gene	0	0	0	0	0	0	0	0	0	0	0	0	0	0	0	0
A_09_P031691	euchromatic gene	0	0	0	0	0	0	0	0	0	0	0	0	0	0	0	0
A_09_P031696	euchromatic gene	0	0	0	0	0	0	0	0	0	0	0	0	0	0	0	0
A_09_P031701	euchromatic gene	0	0	0	0	0	0	0	0	0	0	0	0	0	0	0	0
A_09_P031706	euchromatic gene	0	0	0	0	0	0	0	0	0	0	0	0	0	0	0	0
A_09_P031711	euchromatic gene	0	0	0	0	0	0	0	0	0	0	0	0	0	0	0	0
A_09_P031731	euchromatic gene	0	0	0	0	0	0	0	0	0	0	0	0	0	0	0	0
A_09_P031736	euchromatic gene	0	0	0	0	0	0	0	0	0	0	0	0	0	0	0	0
A_09_P031806	euchromatic gene	0	0	0	0	0	0	0	0	0	0	0	0	0	0	0	0
A_09_P031836	euchromatic gene	0	0	0	0	0	0	0	0	0	0	0	0	0	0	0	0
A_09_P031936	euchromatic gene	0	0	0	0	0	0	0	0	0.5	1	4	0	0	0	0	0
A_09_P031941	euchromatic gene	0	0	0	0	0	0	0	0	0	0	0	0	0	0	0	0
A_09_P031951	euchromatic gene	0	0	0	0	0	0	0	0	0	0	0	0	0	0	0	0
A_09_P031961	euchromatic gene	0	0	0	0	0	0	2	0	0	0	0	0	0	0	0	0
A_09_P031981	euchromatic gene	0	0	0	0	0	0	0	0	0	0	0	0	0	0	0	0
A_09_P032046	euchromatic gene	0.5	0	0	0	0	0	0	0	0	0	0	0	0	0	0	0
A_09_P032096	euchromatic gene	0	0	0	0	0	0	0	0	0	0	0	0	0	0	0	0
A_09_P032136	euchromatic gene	0	0	0	0	0	0	0	0	0	0	0	0	0	0	0	0
A_09_P032151	euchromatic gene	0	0	0	0	0	0	0	0	0	0	0	0	0	0	0	0
A_09_P032201	euchromatic gene	0	0	0	0	0	0	0	0	0	0	0	0	0	0	0	0
A_09_P032206	euchromatic gene	0	0	0	0	0	0	0	0	0	0	0	0	0	0	0	0
A_09_P032211	euchromatic gene	0	0	0	0	0	0	0	0	0	0	0	0	0	0	0	0
A_09_P032231	euchromatic gene	0	0	0	0	0	0	0	0	0	0	0	0	0	0	0	0
A_09_P032241	euchromatic gene	0.5	0	0	0	0	0	1	0	0	0	0	0	0	0	0	0
A_09_P032246	euchromatic gene	1	0	0	0	0	0	0	0	0	0	0	0	0	0	0	0
A_09_P032261	euchromatic gene	0	0	0	0	0	0	0	0	0	0	0	0	0	0	0	0
A_09_P032266	euchromatic gene	0	1	0	0	0	0	1	0	0	0	0	0	0	0	0	0
A_09_P032276	euchromatic gene	0	0	0	0	0	0	0	0	0	0	0	0	0	0	0	0
A_09_P032346	euchromatic gene	0	0	0	0	0	0	0	0	0	0	0	0	0	0	0	0
A_09_P032351	euchromatic gene	0	0	0	0	0	0	0	0	0	0	0	0	0	0	0	0
A_09_P032356	euchromatic gene	0	0	0	0	0	0	1	0	0	0	0	0	0	0	0	0
A_09_P032361	euchromatic gene	0	0	0	0	0	0	0	0	0	0	0	0	0	0	0	0
A_09_P032391	euchromatic gene	1.5	0	0.5	0	0	0	0	0	0	0	0	0	0	0	0	0
A_09_P032396	euchromatic gene	1	0.5	0.5	0	0	0	0	0	0	0	0	0	0	0	0	0
A_09_P032416	euchromatic gene	0	0	0	0	0	0	0	0	0	0	0	0	0	0	0	0
A_09_P032421	euchromatic gene	0.5	0	0	0	0	0	0	0	0	0	0	0	0	0	0	0
A_09_P032426	euchromatic gene	0	0	0	0	0	0	0	0	0	0	0	0	0	0	0	0
A_09_P032471	euchromatic gene	0	0	0	0	0	0	0	0	0	0	0	0	0	0	0	0
A_09_P032486	euchromatic gene	0	0.5	0	0	0	0	0	0	0	0	0	0	0	0	0	0
A_09_P032496	euchromatic gene	6	2.5	0.5	3	6	0	2	0	0	0	0	0	0	0	0	0
A_09_P032521	euchromatic gene	0	0.5	0	0	0	0	0	0	0	0	0	0	0	0	0	0
A_09_P032616	euchromatic gene	0	0	0	0	0	0	0	0	0	0	0	0	0	0	0	0
A_09_P032641	euchromatic gene	0	0	0	0	0	0	0	0	0	0	0	0	0	0	0	0
A_09_P032651	euchromatic gene	4	1	0.5	9	4	0	0	0	0	0	0	0	0	0	0	0
A_09_P032716	euchromatic gene	0	0	1	1	0	0	0	0	0	0	0	0	0	0	0	0
A_09_P032751	euchromatic gene	0	0	1	2	0	0	1	0	0	0	0	0	0	0	0	0
A_09_P032756	euchromatic gene	0	0	0	0	0	0	0	0	0	0	0	0	0	0	0	0
A_09_P032786	euchromatic gene	0	0	0	0	0	0	0	0	0	0	0	0	0	0	0	0
A_09_P032796	euchromatic gene	0	0	0	0	0	0	0	0	0	0	0	0	0	0	0	0
A_09_P032816	euchromatic gene	7.5	0.5	0	0	4	0	3	0	0	0	0	0	0	0	0	0
A_09_P032821	euchromatic gene	0	0	0	0	0	0	0	0	0	0	0	0	0	0	0	0
A_09_P032826	euchromatic gene	0	0	0	0	0	0	0	0	0	0	0	0	0	0	0	0
A_09_P032831	euchromatic gene	1	0	0	0	1	0	0	0	0	0	0	0	0	0	0	0
A_09_P032846	euchromatic gene	0.5	0	0	1	1	0	0	0	0	0	0	0	0	0	0	0
A_09_P032866	euchromatic gene	0	0	0	0	0	0	0	0	0	0	0	0	0	0	0	0
A_09_P032876	euchromatic gene	0	0	0	0	2	0	0	0	0	0	0	0	0	0	0	0
A_09_P032901	euchromatic gene	0	0	0	0	0	0	0	0	0	0	0	0	0	0	0	0
A_09_P032911	euchromatic gene	0	0	0	0	0	0	0	0	0	0	0	0	0	0	0	0
A_09_P032916	euchromatic gene	1	0	0	0	0	0	1	0	0	0	0	0	0	0	0	0
A_09_P032921	euchromatic gene	0.5	0	0	0	0	0	0	0	0	0	0	0	0	0	0	0
A_09_P032936	euchromatic gene	0	0	0	0	0	0	0	0	0	0	0	0	0	0	0	0
A_09_P032941	euchromatic gene	0.5	0	0.5	0	0	0	1	0	0	0	0	0	0	0	0	0
A_09_P033036	euchromatic gene	0	0	0	0	0	0	0	0	0	0	0	0	0	0	0	0
A_09_P033096	euchromatic gene	0.5	1.5	0	2	0	0	0	0	0	0	0	0	0	0	0	0
A_09_P033201	euchromatic gene	0	0	0	0	0	0	0	0	0	0	0	0	0	0	0	0
A_09_P033206	euchromatic gene	0	0	0	0	0	0	0	0	0	0	0	0	0	0	0	0
A_09_P033226	euchromatic gene	0	0	0	0	0	0	0	0	0	0	0	0	0	0	0	0
A_09_P041066	euchromatic gene	0	0	0	0	0	0	0	0	0	0	0	0	0	0	0	0
A_09_P041086	euchromatic gene	0	1	0	0	0	0	0	0	0	0	0	0	0	0	0	0
A_09_P041166	euchromatic gene	0	0	0	0	0	0	1	0	0	0	0	0	0	0	0	0
A_09_P041171	euchromatic gene	0	0	0	0	0	0	0	0	0	0	0	0	0	0	0	0
A_09_P041176	euchromatic gene	0	0	0	0	0	0	0	0	0	0	0	0	0	0	0	0
A_09_P041186	euchromatic gene	0	0	0	0	0	0	0	0	0	0	0	0	0	0	0	0
A_09_P041193	euchromatic gene	7.5	0	0	1	1	0	6	1	0	0	0	0	0	0	0	0
A_09_P041201	euchromatic gene	0	0	0	0	0	0	0	0	0	0	0	0	0	0	0	0
A_09_P041226	euchromatic gene	0	0	0	0	0	0	0	0	0	0	0	0	0	0	0	0
A_09_P041291	euchromatic gene	0	0	0	0	0	0	0	0	0	0	0	0	0	0	0	0
A_09_P041316	euchromatic gene	0	0	0	1	0	0	1	0	0	0	0	0	0	0	0	0
A_09_P041341	euchromatic gene	0	0	0	0	0	0	0	0	0	0	0	0	0	0	0	0
A_09_P041376	euchromatic gene	0	0	0	0	0	0	0	0	0	0	0	0	0	0	0	0
A_09_P041396	euchromatic gene	4.5	0	0	0	0	0	1	0	0	0	0	0	0	0	0	0
A_09_P041441	euchromatic gene	0	0	0	0	0	0	0	0	0	0	0.5	0	0	0	0	0
A_09_P041451	euchromatic gene	1	0	0	0	0	0	0	0	0	0	0	0	0	0	0	0
A_09_P041456	euchromatic gene	0	0	0	1	0	0	0	0	0	0	0	0	0	0	0	0
A_09_P041506	euchromatic gene	0	0	0	0	0	0	0	0	0	0	0	0	0	0	0	0
A_09_P041511	euchromatic gene	0	0	0	0	0	0	0	0	0	0	0	0	0	0	0	0
A_09_P041516	euchromatic gene	0	0	0	0	0	0	0	0	0	0	0	0	0	0	0	0
A_09_P041526	euchromatic gene	0	0.5	0	0	0	0	0	0	0	0	0	0	0	0	0	0
A_09_P041561	euchromatic gene	0	0	0	0	0	0	0	0	0	0	0	0	0	0	0	0
A_09_P041571	euchromatic gene	0	0	0	1	0	0	0	0	0	0	0	0	0	0	0	0
A_09_P041601	euchromatic gene	0	0	0	1	0	0	0	0	0	0	0	0	0	0	0	0
A_09_P041646	euchromatic gene	0	0	0	0	0	0	0	0	0	0	0	0	0	0	0	0
A_09_P041651	euchromatic gene	0	0	0	0	0	0	0	0	0	0	0	0	0	0	0	0
A_09_P041666	euchromatic gene	1.5	0	0	0	0	0	0	0	0	0	0	0	0	0	0	0
A_09_P041681	euchromatic gene	0.5	0	0	0	0	0	0	0	0	0	0	0	0	0	0	0
A_09_P041686	euchromatic gene	0	0	0	0	0	0	0	0	0	0	0	0	0	0	0	0
A_09_P041691	euchromatic gene	0	0.5	0	2	0	0	1	0	0	0	0	0	0	0	0	0
A_09_P041706	euchromatic gene	0	0	0	0	0	0	0	0	0	0	0	0	0	0	0	0
A_09_P041711	euchromatic gene	0	0	0	0	0	0	0	0	0	0	1	1	0	0	1	0
A_09_P041721	euchromatic gene	0	0	0	0	0	0	0	0	0	0	0	0	0	0	0	0
A_09_P041746	euchromatic gene	0	0	0	0	0	0	0	0	0	0	0	0	0	0	0	0
A_09_P041761	euchromatic gene	0	0	0	0	0	0	0	0	0	0	0	0	0	0	0	0
A_09_P041821	euchromatic gene	0	0	0	0	0	0	0	0	0	0	0	0	0	0	0	0
A_09_P041831	euchromatic gene	0	0	0	0	0	0	0	0	0	0	0	0	0	0	0	0
A_09_P041856	euchromatic gene	0	0	0	1	0	0	0	0	0	0	0	0	0	0	0	0
A_09_P041881	euchromatic gene	0	0	0	0	0	0	0	0	0	0	0	0	0	0	0	0
A_09_P041886	euchromatic gene	0	0	0	0	0	0	0	0	0	0	0	0	0	0	0	0
A_09_P041891	euchromatic gene	19	3.5	1.5	0	33	0	38	0	0	0	0	0	0	0	0	0
A_09_P041896	euchromatic gene	0	0	0	0	0	0	0	0	0	0	0	0	0	0	0	0
A_09_P041911	euchromatic gene	0	0	0	0	0	0	0	0	0	0	0	0	0	0	0	0
A_09_P041926	euchromatic gene	0	0	0	0	0	0	0	0	0	0	0	0	0	0	0	0
A_09_P041946	euchromatic gene	0	0	0	0	0	0	0	0	0	0	0	0	0	0	0	0
A_09_P041991	euchromatic gene	0	0	0	0	0	0	0	0	0	0	0	0	0	0	0	0
A_09_P041996	euchromatic gene	0	0	0	0	0	0	0	0	0	0	0	0	0	0	0	0
A_09_P042011	euchromatic gene	0	0	0	0	0	0	0	0	0	0	0	0	0	0	0	0
A_09_P042041	euchromatic gene	0	0	0	0	0	0	2	0	0	0	0	0	0	0	0	0
A_09_P042056	euchromatic gene	0	0	0	0	0	0	0	0	0	0	0	0	0	0	0	0
A_09_P042066	euchromatic gene	0	0	0	0	0	0	0	0	0	0	0	0	0	0	0	0
A_09_P042106	euchromatic gene	0	0	0	0	0	0	0	0	0	0	0	0	0	0	0	0
A_09_P042151	euchromatic gene	0	0	0	0	0	0	0	0	0	0	0	0	0	0	0	0
A_09_P042176	euchromatic gene	6.5	0	0	3	4	0	2	0	0	0	0	0	0	0	0	0
A_09_P042251	euchromatic gene	2	1	0	0	2	0	5	0	0	0	0	0	0	0	0	0
A_09_P042261	euchromatic gene	0	0	0	0	0	0	0	0	0	0	0	0	0	0	0	0
A_09_P042351	euchromatic gene	0	0	0	0	0	0	0	0	0	0	0	0	0	0	0	0
A_09_P042361	euchromatic gene	3	0	0	0	2	0	0	0	0	0	0	0	0	0	0	0
A_09_P042411	euchromatic gene	0	0	2	0	0	0	1	0	0	0	0	0	0	0	0	0
A_09_P042446	euchromatic gene	0	0	0	0	0	0	0	0	0	0	0	0	0	0	0	0
A_09_P042451	euchromatic gene	0	0	0	0	0	0	0	0	0	0	0	0	0	0	0	0
A_09_P042461	euchromatic gene	0	0	0	0	0	0	0	0	0	0	0	0	0	0	0	0
A_09_P042486	euchromatic gene	0	0	0	0	0	0	0	0	0	0	0	0	0	0	0	0
A_09_P042501	euchromatic gene	0	0	0	0	0	0	0	0	0	0	0	0	0	0	0	0
A_09_P042511	euchromatic gene	0	0	0	0	0	0	0	0	0	0	0	0	0	0	0	0
A_09_P042561	euchromatic gene	0	0	0	0	0	0	0	0	0	0	0	0	0	0	0	0
A_09_P042591	euchromatic gene	0.5	0	0	0	0	0	0	0	0	0	0	0	0	0	0	0
A_09_P042596	euchromatic gene	0.5	1	0	0	3	0	4	0	0	0	0	0	0	0	0	0
A_09_P042611	euchromatic gene	0	0	0	0	0	0	0	0	0	0	0	0	0	0	0	0
A_09_P042626	euchromatic gene	0.5	0	0	0	0	0	0	0	0	0	0	0	0	0	0	0
A_09_P042671	euchromatic gene	0	0	0	0	0	0	0	0	0	0	0	0	0	0	0	0
A_09_P042676	euchromatic gene	0.5	0	0	0	0	0	0	0	0	0	0	0	0	0	0	0
A_09_P042716	euchromatic gene	0	0	0	0	0	0	0	0	0	0	0	0	0	0	0	0
A_09_P042946	euchromatic gene	0	0	0	0	0	0	0	0	0	0	0	0	0	0	0	0
A_09_P042956	euchromatic gene	0	2	0	0	1	0	1	0	0	0	0	0	0	0	0	0
A_09_P043091	euchromatic gene	0	0	0	2	0	0	0	0	0	0	0	0	0	0	0	0
A_09_P043096	euchromatic gene	0	0	0	0	1	0	0	0	0	0	0	0	0	0	0	0
A_09_P043101	euchromatic gene	0	0	0	1	0	0	0	0	0	0	0	0	0	0	0	0
A_09_P043106	euchromatic gene	0	0	0	0	0	0	0	0	0	0	0	0	0	0	0	0
A_09_P043111	euchromatic gene	0	0	0	0	0	0	0	0	0	0	0	0	0	0	0	0
A_09_P043116	euchromatic gene	0	0	0	0	0	0	0	0	0	0	0	0	0	0	0	0
A_09_P043121	euchromatic gene	0	0	0	0	0	0	0	0	0	0	0	0	0	0	0	0
A_09_P043126	euchromatic gene	0	0	0	0	0	0	0	0	0	0	0	0	0	0	0	0
A_09_P043131	euchromatic gene	0	0	0	0	0	0	0	0	0	0	0	0	0	0	0	0
A_09_P043136	euchromatic gene	0	0	0	0	0	0	0	0	0	0	0	0	0	0	0	0
A_09_P043141	euchromatic gene	0	0	0	0	0	0	0	0	0	0	0	0	0	0	0	0
A_09_P043146	euchromatic gene	0	0	0	0	0	0	0	0	0	0	0	0	0	0	0	0
A_09_P043151	euchromatic gene	0	0	0	0	0	0	0	0	0	0	0	0	0	0	0	0
A_09_P043156	euchromatic gene	0	0	0	0	0	0	0	0	0	0	0	0	0	0	0	0
A_09_P043161	euchromatic gene	0	0	0	0	3	0	1	0	0	0	0	0	0	0	0	0
A_09_P043166	euchromatic gene	0	0	0	0	0	0	0	0	0	0	0	0	0	0	0	0
A_09_P043171	euchromatic gene	0	0	0	0	0	0	0	0	0	0	0	0	0	0	0	0
A_09_P043176	euchromatic gene	0	0	0	0	0	0	0	0	0	0	0	0	0	0	0	0
A_09_P043181	euchromatic gene	0	0	0	0	0	0	0	0	0	0	0	0	0	0	0	0
A_09_P043186	euchromatic gene	0	0	0	0	0	0	0	0	0	0	0	0	0	0	0	0
A_09_P043191	euchromatic gene	0	0	0	0	1	0	0	0	0	0	0	0	0	0	0	0
A_09_P043196	euchromatic gene	0	0	0	0	0	0	0	0	0.5	0	0	0	0	0	0	0
A_09_P043206	euchromatic gene	0	0.5	0	0	0	0	0	0	0	0	0	0	0	0	0	0
A_09_P043211	euchromatic gene	0	0	0	0	0	0	0	0	0	0	0	0	0	0	0	0
A_09_P043216	euchromatic gene	0	0	0	0	0	0	0	0	0	0	0	0	0	0	0	0
A_09_P043226	euchromatic gene	0	0	0	0	0	0	0	0	1	2	2	0	0	0	0	0
A_09_P043296	euchromatic gene	0	0	0	1	0	0	0	0	0	0	0	0	0	0	0	0
A_09_P043301	euchromatic gene	0	0	0	0	0	0	0	0	0	0	0	0	0	0	0	0
A_09_P043311	euchromatic gene	0	0	0	0	0	0	0	0	0	0	0	0	0	0	0	0
A_09_P043346	euchromatic gene	0	0	0	0	0	0	0	0	0	0	0	0	0	0	0	0
A_09_P043366	euchromatic gene	0	0	0	13	0	0	0	0	0	0	0	0	0	0	0	0
A_09_P043441	euchromatic gene	6.5	0.5	0	2	6	0	3	0	0	0	0	0	0	0	0	0
A_09_P043511	euchromatic gene	0	0	0	0	0	0	0	0	0	0	0	0	0	0	0	0
A_09_P043516	euchromatic gene	0	0	0	0	0	0	0	0	0	0	0	0	0	0	0	0
A_09_P043576	euchromatic gene	1.5	0.5	0	0	2	0	1	0	0	0	0	0	0	0	0	0
A_09_P043701	euchromatic gene	0	0	0	0	0	0	0	0	0	0	0	0	0	0	0	0
A_09_P043706	euchromatic gene	0	0	0	0	0	0	0	0	0	0	0	0	0	0	0	0
A_09_P043761	euchromatic gene	0	0	0	0	0	0	0	0	0	0	0	0	0	0	0	0
A_09_P043836	euchromatic gene	0	0	0	0	0	0	0	0	0	0	0	0	0	0	0	0
A_09_P043851	euchromatic gene	0	0	0	0	0	0	0	0	0	0	0	0	0	0	0	0
A_09_P043861	euchromatic gene	0	0	0	0	0	0	0	0	0	0	0	0	0	0	0	0
A_09_P043866	euchromatic gene	0	0	0	0	0	0	0	0	0	0	0	0	0	0	0	0
A_09_P043871	euchromatic gene	0	0	0	1	0	0	0	0	0	0	0	0	0	0	0	0
A_09_P043906	euchromatic gene	0	0	0	0	0	0	0	0	0	0	0	0	0	0	0	0
A_09_P043911	euchromatic gene	0	0	0	0	0	0	0	0	0	0	0	0	0	0	0	0
A_09_P043916	euchromatic gene	0	0	0	0	0	0	0	0	0	0	0	1	1	0	0	0
A_09_P043956	euchromatic gene	0	0	0	0	0	0	0	0	0	0	0	0	0	0	0	0
A_09_P044006	euchromatic gene	0	0	0	0	0	0	0	0	0	0	0	0	0	0	0	1
A_09_P044061	euchromatic gene	0.5	0	0	1	3	0	1	0	1	0	0	3	3	1	1	0
A_09_P044086	euchromatic gene	0	0	0	0	0	0	0	0	0	0	0	0	0	0	0	0
A_09_P044221	euchromatic gene	0	0	0	0	0	0	0	0	0	0	0	0	0	0	0	0
A_09_P044226	euchromatic gene	0	0	0	0	0	0	0	0	0	0	0	0	0	0	0	0
A_09_P044246	euchromatic gene	0	0	0	0	0	0	0	0	0	0	0	0	0	0	0	0
A_09_P044311	euchromatic gene	0	0	0	0	0	0	0	0	0	0	0	0	0	0	0	0
A_09_P044356	euchromatic gene	0	0	0	0	0	0	0	0	0	0	0	0	0	0	0	0
A_09_P044376	euchromatic gene	0	0	0.5	1	3	1	0	0	0	0	0	0	1	0	0	0
A_09_P044406	euchromatic gene	0	0	0	0	0	0	0	0	0	0	0	0	0	0	0	0
A_09_P044451	euchromatic gene	0	0	0	0	0	0	0	0	0	0	0	0	0	0	0	0
A_09_P044476	euchromatic gene	0	0	0	0	0	0	0	0	0	0	0	0	0	0	0	0
A_09_P044521	euchromatic gene	0	0	0	0	0	0	0	0	0	0	0	0	0	0	0	0
A_09_P044531	euchromatic gene	0	0	0	0	0	0	0	0	0	0	0	0	0	0	0	0
A_09_P044586	euchromatic gene	0	0	0	0	0	0	0	0	0	0	0	0	0	0	0	0
A_09_P044636	euchromatic gene	0	0	0	0	0	0	0	0	0	0	0	0	0	0	0	0
A_09_P044696	euchromatic gene	0	0	0	0	0	0	0	0	0	0	0	0	0	0	0	0
A_09_P044771	euchromatic gene	0	0	0	0	0	0	0	0	0	0	0	0	0	0	0	0
A_09_P044791	euchromatic gene	0	0.5	1	0	0	0	0	0	0	0	0	0	0	0	0	0
A_09_P044801	euchromatic gene	0	0	0	0	0	0	0	0	0	0	0	0	0	0	0	0
A_09_P044851	euchromatic gene	0	0	0	0	0	0	0	0	0	0	0	0	0	0	0	0
A_09_P044856	euchromatic gene	0	0	0	0	0	0	0	0	0	0	0	0	0	0	0	0
A_09_P044971	euchromatic gene	0	0	0	0	0	0	0	0	0	0	0	0	0	0	0	0
A_09_P045041	euchromatic gene	0	0	0	0	0	0	0	0	0	0	0	0	0	0	0	0
A_09_P045151	euchromatic gene	0	0	0	0	1	0	2	0	0	0	0	0	0	0	0	0
A_09_P045171	euchromatic gene	0	0	0	0	0	0	0	0	0	0	0	0	0	0	0	0
A_09_P045216	euchromatic gene	0	0.5	0	0	0	0	0	0	0	0	0	0	0	0	0	0
A_09_P045266	euchromatic gene	0	0	0	0	0	0	0	0	0	0	0	0	0	0	0	0
A_09_P045286	euchromatic gene	0	0	0	0	1	0	0	0	0	0	0	0	0	0	0	0
A_09_P045301	euchromatic gene	0	0	3.5	0	0	1	0	0	0	0	0	0	0	0	0	0
A_09_P045371	euchromatic gene	0	0	0	0	0	0	0	0	0	0	0	0	0	0	0	0
A_09_P045416	euchromatic gene	0	0	0	0	0	0	0	0	0	0	0	0	0	0	0	0
A_09_P045571	euchromatic gene	0	0	0	0	0	0	0	0	0	0	0	0	0	0	0	0
A_09_P045581	euchromatic gene	0	0	0	0	0	0	1	0	0	0	0	0	0	0	0	0
A_09_P045626	euchromatic gene	0	0	0	0	0	0	0	0	0	0	0	0	0	0	0	0
A_09_P045701	euchromatic gene	0	0	0	0	1	0	0	0	0	0	0	0	0	0	0	0
A_09_P045726	euchromatic gene	0	0	0	0	0	0	0	0	0	0	0	0	0	0	0	0
A_09_P045756	euchromatic gene	0	0	0	0	0	0	0	0	0	0	0	0	0	0	0	0
A_09_P045811	euchromatic gene	0	0	0	0	0	0	0	0	0	0	0	0	0	0	0	0
A_09_P045886	euchromatic gene	0	0	0	0	0	0	0	0	0	0	0	0	0	0	0	0
A_09_P045896	euchromatic gene	0	0	0	0	0	0	0	0	0	0	0	0	0	0	0	0
A_09_P045941	euchromatic gene	0	0	0	0	0	0	0	0	0	0	0	0	0	0	0	0
A_09_P045976	euchromatic gene	0	0	0	0	0	0	0	0	0	0	0	0	0	0	0	0
A_09_P046011	euchromatic gene	0	0	0	0	0	0	1	0	0	0	0	0	0	0	0	0
A_09_P046026	euchromatic gene	0	0	0	0	0	0	0	0	0	0	0	0	0	0	0	0
A_09_P046071	euchromatic gene	0	0	0	0	0	0	0	0	0	0	0	0	0	0	0	0
A_09_P046081	euchromatic gene	0.5	0	0	0	5	0	5	0	0	0	0	0	0	0	0	0
A_09_P046086	euchromatic gene	0.5	0	0	0	4	0	0	0	3.5	0	4.5	0	0	0	0	0
A_09_P046096	euchromatic gene	0	0	0	0	0	0	0	0	0	0	0	0	0	0	0	0
A_09_P046206	euchromatic gene	0	0	0	0	0	0	1	0	0	0	0	0	0	0	0	0
A_09_P046346	euchromatic gene	0	0	0	0	0	0	0	0	0	0	0	0	0	0	0	0
A_09_P046351	euchromatic gene	0	0	0	0	0	0	0	0	0	0	0	0	0	0	0	0
A_09_P046356	euchromatic gene	0	0	0	0	0	0	0	0	0	0	0	0	0	0	0	0
A_09_P046371	euchromatic gene	0	0	0	0	0	0	0	0	0	0	0	0	0	0	0	0
A_09_P046376	euchromatic gene	0	0	0	0	0	0	0	0	0	0	0	0	0	0	0	0
A_09_P046381	euchromatic gene	0	0	0	0	0	0	0	0	0	0	0	0	0	0	0	0
A_09_P046436	euchromatic gene	0	0	0	0	0	0	0	0	0	0	0	0	0	0	0	0
A_09_P046461	euchromatic gene	1.5	0	0	0	0	0	0	0	0	0	0	0	0	0	0	0
A_09_P046476	euchromatic gene	0	0	0	0	0	0	0	0	0	0	0	0	0	0	0	0
A_09_P046546	euchromatic gene	0	0	0	0	0	0	0	0	0	0	0	0	0	0	0	0
A_09_P046581	euchromatic gene	0	0	0	0	0	0	0	0	0	0	0	0	0	0	0	0
A_09_P046791	euchromatic gene	0	0	0	0	0	0	0	0	0	0	0	0	0	0	0	0
A_09_P046821	euchromatic gene	0	0	0	0	0	0	0	0	0	0	0	0	0	0	0	0
A_09_P046831	euchromatic gene	4.5	0	0	0	2	0	2	0	0	0	0	0	0	0	0	0
A_09_P046841	euchromatic gene	0	0	0	0	0	0	0	0	0	0	0	0	0	0	0	0
A_09_P046876	euchromatic gene	0	0	0	0	0	0	0	0	0	0	0	0	0	0	0	0
A_09_P046921	euchromatic gene	0	0	0	0	0	0	0	0	0	0	0	0	0	0	0	0
A_09_P046956	euchromatic gene	0.5	0	0	0	0	0	0	0	0	0	0	0	0	0	0	0
A_09_P046966	euchromatic gene	0	0	0	0	0	0	0	0	0	0	0	0	0	0	1	0
A_09_P046976	euchromatic gene	0	0	0	0	0	0	0	0	0	0	0	0	0	0	0	0
A_09_P047006	euchromatic gene	0	0	0	0	0	0	0	0	0	0	0	0	0	0	0	0
A_09_P047196	euchromatic gene	0	0	0	0	0	0	0	0	0	0	0	0	0	0	0	0
A_09_P047281	euchromatic gene	0	0	0	0	0	0	0	0	0	0	0	0	0	0	0	0
A_09_P047286	euchromatic gene	0	0	0	0	0	0	0	0	0	0	0	0	0	0	0	0
A_09_P047366	euchromatic gene	0	0	0	0	0	0	0	0	0	0	0	0	0	0	0	0
A_09_P047376	euchromatic gene	0	0	0	0	0	0	0	0	0	0	0	0	0	0	0	0
A_09_P047386	euchromatic gene	0	0	0	0	0	0	0	0	0	0	0	0	0	0	0	0
A_09_P047431	euchromatic gene	0	0	0	0	0	0	0	0	0	0	0	0	0	0	0	0
A_09_P047466	euchromatic gene	0	0	0	0	0	0	0	0	0	0	0	0	0	0	0	0
A_09_P047576	euchromatic gene	0	0	0	0	0	0	0	0	0	0	0	0	0	0	0	0
A_09_P047591	euchromatic gene	0	0	0	0	0	0	0	0	0	0	0	0	0	0	0	0
A_09_P047601	euchromatic gene	0	0	0	0	0	0	0	0	0	0	0	0	0	0	0	1
A_09_P047646	euchromatic gene	0	0	0	0	0	0	0	0	0	0	0	0	0	0	0	0
A_09_P047666	euchromatic gene	0	0	0	0	0	0	0	0	0	0	0	0	0	0	0	0
A_09_P047751	euchromatic gene	0	0	0	0	0	0	0	0	0	0	0	0	0	0	0	0
A_09_P047756	euchromatic gene	0	0	0	0	0	0	0	0	0	0	0	0	0	0	0	0
A_09_P047781	euchromatic gene	0	0	0	0	0	0	0	0	0	0	0	0	0	0	0	0
A_09_P047846	euchromatic gene	0	0	0	0	0	0	0	0	0	0	0	0	0	0	0	0
A_09_P047851	euchromatic gene	0	0	0	0	0	0	0	0	0	0	0	0	0	0	0	0
A_09_P047856	euchromatic gene	0	0	0	0	0	0	0	0	0	0	0	0	0	0	0	0
A_09_P047881	euchromatic gene	0	0	0	0	0	0	0	0	0	0	0	0	0	0	0	0
A_09_P047911	euchromatic gene	0	0	0	0	0	0	0	0	0	0	0	0	0	0	0	0
A_09_P047976	euchromatic gene	0	0	0	0	0	0	0	0	0	0	0	0	0	0	0	0
A_09_P048101	euchromatic gene	0	0	0	0	0	0	0	0	0	0	0	0	0	0	0	0
A_09_P048111	euchromatic gene	0	0	0	0	0	0	0	0	0	0	0	0	0	0	0	0
[truncated: 35,992 more rows]
