# Supplementary material for: Mapping the pericentric heterochromatin by comparative genomic hybridization analysis and chromosome deletions in Drosophila melanogaster
Source: HighWire-hosted journal article supplement (doi:10.1101/gr.137406.112), 2012-06-28
Supplement: Supplemental_Table_10-Mapping_piRNA_clusters_on_arm_U.xlsx [file Supplemental_Table_10-Mapping_piRNA_clusters_on_arm_U.xlsx]

## Sheet: Sheet1
Cluster ID	Chromosome	Start	Stop	Length [bp]	UContigID	Contig Start	Contig End	Length	Map	Category
132	ArmU	3411258	3430431	19174	185	3411260	3430431	19171	2R1	perfectly mapped
85	ArmU	1195999	1232761	36763	14	1131370	1221379	90009	2R4	perfectly mapped
77	ArmU	1965187	1982854	17668	30	1942223	1988192	45969	2R5	perfectly mapped
74	ArmU	335892	387279	51388	2	325272	429354	104082	3R	mapped
76	ArmU	69266	119959	50694	1	1	325170	325169	unmappable	disagree
115	ArmU	923516	964236	40721	10	900816	964236	63420	unmappable	disagree
99	ArmU	1798246	1833539	35294	27	1805832	1887052	81220	unmappable	disagree
52	ArmU	2074759	2097753	22995	32	2048220	2097753	49533	unmappable	disagree
54	ArmU	2443444	2477706	34263	58	2459833	2477706	17873	unmappable	disagree
68	ArmU	3523650	3541455	17806	204	3532037	3541455	9418	unmappable	no match
129	ArmU	4785449	4806474	21026	419	4786507	4799823	13316	unmappable	disagree
43	ArmU	5629533	5635726	6194	586	5629535	5635726	6191	unmappable	no match
101	ArmU	6290118	6294042	3925	761	6290120	6294042	3922	unmappable	no match
82	ArmU	6384391	6388107	3717	788	6384393	6388107	3714	unmappable	no match
94	ArmU	6557194	6560652	3459	845	6558706	6560652	1946	unmappable	no match
116	ArmU	7190420	7193117	2698	1067	7190422	7193117	2695	unmappable	disagree
63	ArmU	8103557	8105457	1901	1480	8103559	8105457	1898	unmappable	disagree
121	ArmU	8736651	8737934	1284	1861	8736608	8737934	1326	unmappable	no match
95	ArmU	9094871	9096075	1205	2125	9094873	9096075	1202	unmappable	no match
80	ArmU	9175100	9176285	1186	2187	9175102	9176285	1183	unmappable	no match
17	ArmU	964336	1041768	77433	11	964338	1024355	60017	X	mapped
18	ArmU	3113117	3137249	24133	153	3122872	3137315	14443	X	mapped
108	ArmU	4179317	4183670	4354	311	4179302	4183670	4368	X2	perfectly mapped
61	ArmU	5466328	5474996	8669	556	5466330	5474996	8666	X2	perfectly mapped
113	ArmU	5821242	5826474	5233	634	5821244	5826474	5230	X2	perfectly mapped
105	ArmU	6477805	6481358	3554	816	6477807	6481358	3551	X2	perfectly mapped
103	ArmU	6881294	6884290	2997	952	6881296	6884290	2994	X2	perfectly mapped
117	ArmU	7204376	7207062	2687	1072	7204378	7207062	2684	X2	perfectly mapped
122	ArmU	8795936	8797237	1302	1903	8795938	8797237	1299	X2	perfectly mapped
102	ArmU	9635434	9636520	1087	2560	9635436	9636520	1084	X2	perfectly mapped
123	ArmU	5447419	5456787	9369	553	5447421	5456787	9366	X3/X4	perfectly mapped
118	ArmU	6216515	6220587	4073	740	6216517	6220587	4070	X3/X4	perfectly mapped
120	ArmU	6237223	6241235	4013	745	6237225	6241235	4010	X3/X4	perfectly mapped
124	ArmU	6606234	6609605	3372	860	6606236	6609605	3369	X3/X4	perfectly mapped
87	ArmU	6654158	6657433	3276	875	6654160	6657433	3273	X3/X4	perfectly mapped
127	ArmU	6837559	6840618	3060	936	6837561	6840618	3057	X3/X4	perfectly mapped
126	ArmU	7028833	7031679	2847	1007	7028835	7031679	2844	X3/X4	perfectly mapped
109	ArmU	7618758	7621076	2319	1256	7618760	7621076	2316	X3/X4	perfectly mapped
119	ArmU	6233110	6237123	4014	744	6233112	6237123	4011	X4	perfectly mapped
46	ArmU	7209933	7212604	2672	1074	7209935	7212604	2669	X4	perfectly mapped
10	ArmU	5766708	5772171	5464	619	5766710	5772171	5461	XY	perfectly mapped
14	ArmU	7542733	7545114	2382	1223	7542735	7545114	2379	XY	perfectly mapped
66	ArmU	9623566	9624654	1089	2550	9623568	9624654	1086	XY	perfectly mapped
125	ArmU	3928119	3942902	14784	280	4015851	4017758	1907	Y	perfectly mapped
7	ArmU	4015849	4029971	14123	281	4022447	4029971	7524	Y	perfectly mapped
64	ArmU	8907471	8908731	1261	1984	8907473	8908731	1258	Y	perfectly mapped
