# Supplementary material for: Mapping the pericentric heterochromatin by comparative genomic hybridization analysis and chromosome deletions in Drosophila melanogaster
Source: HighWire-hosted journal article supplement (doi:10.1101/gr.137406.112), 2012-06-28
Supplement: Supplemental_Table_11-Transcription.xlsx [file Supplemental_Table_11-Transcription.xlsx]

## Sheet: Microarray
		Normalized Red Intensity (Plus Strand)						Normalized Red Intensity (Minus Strand)							Log2(Test/Reference) for the plus strand
Probe ID	NAME	0-1 hr	Cycle 13 to early Cycle 14	Mid- to Late Cycle 14	3-4 hrs	4-5 hrs	19-22 hrs	0-1 hr	Cycle 13 to early Cycle 14	Mid- to Late Cycle 14	3-4 hrs	4-5 hrs	19-22 hrs	Forward or Reverse	0-1 hr	Cycle 13 to early Cycle 14	Mid- to Late Cycle 14	3-4 hrs	4-5 hrs	19-22 hrs
A_09_P000046	Euchromatic gene	6.58659	8.24785	2.88246	8.48521	3.61972	312.082							forward	-3.5	-4.075	-3.48	-4.125	-4.515	2.63
A_09_P000051	Euchromatic gene	4.81312	12.7743	125.023	255.302	194.256	13.2231							forward	-3.62	-2.11	2.06	2.585	2.1	-1.73
A_09_P000056	Euchromatic gene	3.61301	27.687	193.271	343.794	199.635	9.47333							forward	-3.06	-0.645	2.905	2.995	2.18	-2.125
A_09_P000061	Euchromatic gene	0.833727	2.06427	4.92836	2.89587	3.45858	119.888							forward	-3	-1.77	-3	-3	-3	4.115
A_09_P000066	Euchromatic gene	3.32706	0.854855	2.28386	13.0581	16.0888	168.516							forward	-3.745	-4.62	-4.57	-3.345	-2.055	1.715
A_09_P000086	Euchromatic gene	2.89081	0	6.34489	0.945601	0.0218234	5.60495							forward	-3	-3	-3	-3	-3	-3
A_09_P000161	Euchromatic gene	69.3006	618.561	1168.31	1621.01	1480.72	3486.87							forward	-3.365	-0.84	-0.015	0.215	0.12	1.345
A_09_P000166	Euchromatic gene	6105.36	1575.84	4202.73	3355.56	4284.9	2822.95							forward	0.51	-1.955	-0.46	-0.81	-0.48	-1.105
A_09_P000196	Euchromatic gene	0.48294	0	2.00505	2.42647	4.43745	6.73633							forward	-3	-3	-3	-3	-3	-3
A_09_P000201	Euchromatic gene	0.372669	0.228502	1.9076	6.42041	2.64571	299.907							forward	-1.8	-2.365	-3.1	-2.665	-2.965	4.055
A_09_P000206	Euchromatic gene	0	1.61743	3.61031	0.639771	1.56851	16.3822							forward	-3	-3	-3	-3	-3	2.52
A_09_P000261	Euchromatic gene	24.2277	18.2066	10.2652	14.4279	12.0199	1.46636							forward	3.525	2.735	-3	-3	-3	-3
A_09_P000346	Euchromatic gene	861.126	1423.35	540.893	604.042	531.672	293.273							forward	0.565	1.055	0.115	0.005	-0.235	-1.46
A_09_P000356	Euchromatic gene	0.396045	6.25516	8.09802	14.6423	3.42657	6.21698							forward	-3	-3	-3	-3	-3	-3
A_09_P000361	Euchromatic gene	2.65541	14.725	61.2682	44.2203	7.21641	4.26186							forward	-3	-3	3.955	3.14	-3	-3
A_09_P000366	Euchromatic gene	0	3.75161	2.63804	1.92183	2.345	3.73817							forward	-3	-3	-3	-3	-3	-3
A_09_P000371	Euchromatic gene	2.71434	3.57457	4.70679	4.83742	6.22452	0.0217412							forward	-3	-3	-3	-3	-3	-3
A_09_P000376	Euchromatic gene	0	0.192806	0.109577	5.89959	0.602429	2.11281							forward	-3	-3	-3	-3	-3	-3
A_09_P000381	Euchromatic gene	0.764993	0.646757	2.72422	3.21249	0.759144	2.86218							forward	-3	-3	-3	-3	-3	-3
A_09_P000391	Euchromatic gene	2.80554	1.11242	1.80535	4.16678	15.6307	3.95327							forward	-3	-3	-3	-3	-3	-3
A_09_P000446	Euchromatic gene	0.15439	0	1.17509	0.358705	3.84471	2.62604							forward	-3	-3	-3	-3	-3	-3
A_09_P000451	Euchromatic gene	189.767	241.118	98.3723	64.1856	29.6683	5.58009							forward	2.83	2.525	1.785	0.425	-1.115	-3.46
A_09_P000456	Euchromatic gene	3.06775	2.07609	1.59951	1.2536	2.42123	0.63772							forward	-3	-3	-3	-3	-3	-3
A_09_P000466	Euchromatic gene	3.29992	0.675778	2.87956	2.54471	2.73088	5.39345							forward	-3	-3	-3	-3	-3	-3
A_09_P000531	Euchromatic gene	2.1648	6.69531	6.07727	4.15529	9.31807	1111.86							forward	-4.19	-4.37	-4.06	-4.285	-3.785	4.16
A_09_P000546	Euchromatic gene	0.267364	7.73913	13.3641	11.6615	11.0109	4.66281							forward	-3	-3	-3	-3	-3	-3
A_09_P000771	Euchromatic gene	21.6402	6.27495	5.09671	3.94007	6.44427	6.57092							forward	1.195	-3	-3	-3	-3	-3
A_09_P000781	Euchromatic gene	3.25608	5.05918	0.861481	2.55751	5.48117	1.61454							forward	-3	-3	-3	-3	-3	-3
A_09_P000806	Euchromatic gene	2.22329	1.96841	3.01239	7.56386	6.3136	4.14646							forward	-3	-3	-3	-3	-3	-3
A_09_P000811	Euchromatic gene	0.592519	2.63589	8.09047	8.015	6.25913	4.3982							forward	-3	-3	-3	-3	-3	-3
A_09_P000831	Euchromatic gene	51.3191	49.0926	79.2592	54.1924	52.9415	41.7233							forward	1.12	0.635	1.245	0.98	0.78	-0.145
A_09_P000951	Euchromatic gene	3303.29	4548.97	1114.06	809.825	1213.79	3180.66							forward	0.145	0.2	-1.315	-1.665	-1.235	-0.095
A_09_P000976	Euchromatic gene	78.697	113.487	109.779	132.334	128.491	923.181							forward	-4.5	-4.125	-4.22	-4.24	-4.435	-1.795
A_09_P000991	Euchromatic gene	8.59835	13.7712	17.1122	53.3405	91.9509	36.9253							forward	-5.255	-5.38	-5.15	-4.005	-2.935	-4.98
A_09_P001001	Euchromatic gene	19.2759	16.7807	17.7928	48.4404	63.6971	29.6966							forward	-0.98	-1.705	-1.885	-0.385	0.09	-1.055
A_09_P001006	Euchromatic gene	0.923841	1.15674	0.898148	3.73587	3.62959	1.49532							forward	-3	-3	-3	-3	-3	-3
A_09_P001026	Euchromatic gene	0	0	1.21454	6.55044	3.12454	0							forward	-3	-3	-3	-3	-3	-3
A_09_P001176	Euchromatic gene	2.34477	1.16691	1.08991	4.2054	3.24202	0.622145							forward	-3	-3	-3	-3	-3	-3
A_09_P001186	Euchromatic gene	2.38426	2.55493	0	2.7558	1.20482	2.85346							forward	-3	-3	-3	-3	-3	-3
A_09_P001456	Euchromatic gene	2.36636	2.05283	2.12036	2.18759	0.981926	1.30316							forward	-3	-3	-3	-3	-3	-3
A_09_P001461	Euchromatic gene	0.602218	4.61031	0.327334	0.539616	2.82202	0.466139							forward	-3	-3	-3	-3	-3	-3
A_09_P001471	Euchromatic gene	0.371285	0.099406	0.438821	3.63618	0.855555	2.89517							forward	-3	-3	-3	-3	-3	-3
A_09_P001811	Euchromatic gene	3.53191	5.09551	2.65298	5.6824	3.25486	1.22602							forward	-3	-3	-3	-3	-3	-3
A_09_P002076	Euchromatic gene	3.38441	0.466192	0.72691	2.90324	4.3849	0							forward	-3	-3	-3	-3	-3	-3
A_09_P002081	Euchromatic gene	0	0	0	0.0363001	1.2842	0.998076							forward	-3	-3	-3	-3	-3	-3
A_09_P002086	Euchromatic gene	5.967	1.16931	9.90764	27.8744	43.1835	11.3812							forward	-1.22	-2.215	-0.065	0.49	1.72	-0.27
A_09_P002136	Euchromatic gene	2.64301	6.48741	7.10499	5.93243	4.90527	1.45882							forward	-3	-3	-3	-3	-3	-3
A_09_P002141	Euchromatic gene	6.60213	16.5943	11.3335	9.45284	8.09964	2.85955							forward	-3	1.33	-3	-3	-3	-3
A_09_P002166	Euchromatic gene	769.011	1284.99	628.885	592.355	623.044	242.04							forward	1.14	1.59	0.645	0.595	0.595	-1.3
A_09_P002206	Euchromatic gene	31.2493	184.286	276.47	170.135	150.131	35.4813							forward	-0.11	2.11	3.015	2.015	1.745	-0.8
A_09_P002346	Euchromatic gene	10.0379	7.07454	8.1651	4.15336	4.88153	4.90535							forward	-3	-3	-3	-3	-3	-3
A_09_P002351	Euchromatic gene	0	2.10639	3.03323	2.42261	3.77731	3.61882							forward	-3	-3	-3	-3	-3	-3
A_09_P002466	Euchromatic gene	0	1.67859	0	3.58173	0	1.38779							forward	-3	-3	-3	-3	-3	-3
A_09_P002486	Euchromatic gene	10.3326	4.71083	13.535	7.44822	6.19152	26.0159							forward	-3	-3	0.65	-3	-3	1.36
A_09_P002506	Euchromatic gene	7.44452	0.382162	2.30604	2.07746	3.11296	21.2553							forward	-1.615	-3	-1.36	-2.13	-2.44	0.635
A_09_P002521	Euchromatic gene	0	1.55366	0.194952	4.75919	0	3.54868							forward	-3	-3	-3	-3	-3	-3
A_09_P002601	Euchromatic gene	18.2896	23.2018	79.0677	106.121	76.9808	2.86779							forward	0.765	-0.025	2.46	2.82	2.175	-3.29
A_09_P002606	Euchromatic gene	1067.49	2077.11	1954.45	1494.98	684.023	400.752							forward	0.385	1.23	1.33	0.945	-0.16	-1.36
A_09_P002611	Euchromatic gene	979.163	555.601	128.022	230.08	423.828	607.583							forward	0.81	-0.075	-1.98	-1.25	-0.36	0
A_09_P002636	Euchromatic gene	2592.72	234.401	278.831	565.441	887.416	2500.78							forward	0.21	-2.82	-2.565	-1.935	-1.365	0.045
A_09_P002646	Euchromatic gene	350.247	803.45	630.974	662.043	702.533	926.055							forward	0.395	1.17	1.13	0.71	0.765	1.175
A_09_P002661	Euchromatic gene	3.85235	57.4509	56.7476	23.9145	9.22005	974.284							forward	-3.915	-0.915	-0.83	-2.68	-4.645	2.995
A_09_P002981	Euchromatic gene	554.607	1308.7	2394.57	3060.07	2443.08	441.924							forward	-0.295	0.68	1.295	1.5	1.245	-1.395
A_09_P002986	Euchromatic gene	5.75425	4.59792	10.9241	8.09452	9.44812	4.0322							forward	-3	-3	-3	-3	-3	-3
A_09_P002991	Euchromatic gene	1.86621	1.8432	0.210399	5.46161	1.5788	1.19102							forward	-3	-3	-3	-3	-3	-3
A_09_P002996	Euchromatic gene	3.63712	8.45162	9.77269	6.33449	4.85009	5.89811							forward	-3	-3	-3	-3	-3	-3
A_09_P003001	Euchromatic gene	931.704	1747.63	1873.7	2056	1862.8	744.383							forward	-0.085	0.705	0.91	0.875	0.665	-0.635
A_09_P003006	Euchromatic gene	1713.47	2140.62	6713.24	9824.82	10779.7	26968.5							forward	-1.495	-1.225	-0.38	0.33	0.625	1.52
A_09_P003011	Euchromatic gene	0.181594	3.07217	1.39651	4.72114	0.0510846	1307.13							forward	-3.755	-4.435	-4.895	-4.025	-4.465	5.37
A_09_P003016	Euchromatic gene	2.56758	4.0479	2.07959	1.44231	4.01013	0.434686							forward	-3	-3	-3	-3	-3	-3
A_09_P003021	Euchromatic gene	0.870236	2.10151	0.72968	1.15783	0.769468	2.52103							forward	-3	-3	-3	-3	-3	-3
A_09_P003026	Euchromatic gene	0	7.06832	4.97976	2.33789	4.55125	1.69747							forward	-3	-3	-3	-3	-3	-3
A_09_P003031	Euchromatic gene	0	2.91889	0	1.96514	3.00613	3.59259							forward	-3	-3	-3	-3	-3	-3
A_09_P003036	Euchromatic gene	4.61743	7.50351	3.72948	2.86767	2.71529	8.53371							forward	-1.545	-2.18	-2.525	-1.965	-1.755	-0.965
A_09_P003041	Euchromatic gene	5.53506	4.83646	2.39208	4.46995	0.958137	6.38447							forward	-3	-3	-3	-3	-3	-3
A_09_P003051	Euchromatic gene	1282.33	2480.55	1892.86	2310.26	2255.15	299.747							forward	-0.1	0.6	0.4	0.615	0.525	-2.41
A_09_P003056	Euchromatic gene	3.01135	3.18347	1.63774	3.77129	6.65748	0							forward	-3	-3	-3	-3	-3	-3
A_09_P003061	Euchromatic gene	21.1057	12.35	9.36225	11.1227	13.4843	614.491							forward	-0.275	-1.69	-1.535	-2.42	-1.775	2.56
A_09_P003066	Euchromatic gene	0.0518939	1.64079	0.909424	4.93307	1.21007	1.03117							forward	-3	-3	-3	-3	-3	-3
A_09_P003071	Euchromatic gene	111.221	73.7869	45.7979	122.361	101.343	7.9854							forward	1.94	0.955	0.51	1.16	0.615	-2.86
A_09_P003076	Euchromatic gene	0	0.965901	2.05977	2.58978	2.95534	39.798							forward	-3	-3	-3	-3	-3	2.92
A_09_P003081	Euchromatic gene	2.11072	3.32431	0.955358	2.74642	2.24464	1.38664							forward	-3	-3	-3	-3	-3	-3
A_09_P003086	Euchromatic gene	3.30517	12.0741	10.2203	9.83956	9.06223	16.5819							forward	-3.255	-2.53	-2.16	-2.925	-3.12	-1.265
A_09_P003091	Euchromatic gene	1651.67	1781.26	1312.49	2156.6	2168.35	759.76							forward	0.455	0.44	0.045	0.64	0.555	-0.9
A_09_P003721	Euchromatic gene	123.487	242.823	201.419	177.789	127.834	86.8109							forward	0.845	0.97	1.085	0.615	-0.03	-1.435
A_09_P003831	Euchromatic gene	10.3047	5.605	6.70732	5.6881	9.1833	15.3817							forward	-1.32	-2.215	-2.005	-1.585	-1.675	0.055
A_09_P003836	Euchromatic gene	534.945	468.061	61.1719	114.023	170.801	277.135							forward	1.745	1.285	-1.705	-1.04	-0.415	-0.085
A_09_P003846	Euchromatic gene	8.42865	123.571	45.6031	177.458	359.554	580.313							forward	-3.96	-0.76	-2.18	-0.525	0.33	1.01
A_09_P003851	Euchromatic gene	15.3468	67.0997	69.4633	86.6107	182.641	173.99							forward	-2.81	-1.745	-1.06	-1.08	-0.05	-0.59
A_09_P003861	Euchromatic gene	32.5968	20.9206	14.1818	17.3929	14.5229	4.50095							forward	1.095	0.72	0.065	0.235	-0.105	-1.05
A_09_P003896	Euchromatic gene	8.70878	3.12315	1.14098	0.203197	2.48543	6.10652							forward	-3	-3	-3	-3	-3	-3
A_09_P003991	Euchromatic gene	3.29438	1.74597	5.88038	2.3318	4.14744	7.80534							forward	-3	-3	-3	-3	-3	-3
A_09_P003996	Euchromatic gene	12.1476	9.84591	6.76889	9.84958	6.10105	15.5064							forward	-0.97	-0.865	-0.975	-1.92	-2.715	-0.345
A_09_P004031	Euchromatic gene	1100.99	935.746	3644.47	4470.6	4839.52	1875.4							forward	-1.08	-1.325	0.415	0.73	0.87	-0.54
A_09_P004056	Euchromatic gene	10.2689	10.6847	37.3369	170.414	343.918	112.75							forward	-3.685	-4.715	-1.94	0.26	1.075	-0.905
A_09_P004061	Euchromatic gene	2.79884	2.49752	4.89828	10.2433	9.94003	2.26499							forward	-3	-3	-1.425	-3	-3	-1.745
A_09_P004071	Euchromatic gene	54.3431	368.251	3338.72	11064	16385.7	9667.87							forward	-7.25	-4.68	-2.05	-0.315	0.225	-0.74
A_09_P004076	Euchromatic gene	2.50633	2.31278	2.10435	3.09347	6.7814	87.2882							forward	-2.035	-2.385	-3.005	-2.75	-2.575	2.55
A_09_P004136	Euchromatic gene	8.15463	0.725554	2.00514	3.40326	6.03156	111.594							forward	-3.1	-4.035	-3.93	-3.83	-3.36	2.095
A_09_P004141	Euchromatic gene	98.6362	57.5893	14.031	11.7482	7.36392	9.2814							forward	2.24	0.505	-1.715	-2.165	-3.49	-1.98
A_09_P004146	Euchromatic gene	319.429	389.58	415.497	668.793	817.271	1730.65							forward	-0.71	-0.625	-0.57	-0.035	0.145	1.13
A_09_P004151	Euchromatic gene	3.22899	451.78	839.812	880.563	2590.4	237.717							forward	-7.005	0.115	1.185	1.385	2.78	-1.32
A_09_P004171	Euchromatic gene	27.8556	24.5703	19.1115	18.2567	22.5733	147.162							forward	-0.605	-1.635	-1.73	-2.325	-2.23	0.9
A_09_P004221	Euchromatic gene	905.067	874.552	1476.91	1589.95	1236.5	139.307							forward	0.85	0.485	1.42	1.295	1.03	-2.535
A_09_P004356	Euchromatic gene	127.456	30.8745	5.42847	4.89118	9.44798	209.622							forward	1.53	-1.235	-3.695	-4.765	-4.275	1.63
A_09_P004361	Euchromatic gene	5.07459	2.7268	2.78792	11.1029	18.9158	948.539							forward	-5.365	-6.445	-5.47	-4.815	-3.14	2.805
A_09_P004466	Euchromatic gene	325.504	704.122	649.115	527.013	467.021	62.143							forward	0.735	1.555	1.375	0.805	0.665	-2.785
A_09_P004471	Euchromatic gene	564.679	1358.52	1105.24	633.185	430.106	92.3632							forward	0.55	1.435	1.145	0.395	-0.27	-2.89
A_09_P004501	Euchromatic gene	2.44932	3.18877	0.664253	1.6207	3.60032	8.02574							forward	-1.465	-3.075	-2.845	-2.66	-3.125	-1.45
A_09_P004506	Euchromatic gene	4.32749	1.06243	0	2.94138	0.895838	1.18243							forward	-3	-3	-3	-3	-3	-3
A_09_P009516	Euchromatic gene	2032.52	4152.99	2625.94	1106.27	1112.11	452.495							forward	0.68	1.495	0.86	-0.19	-0.25	-2.05
A_09_P009581	Euchromatic gene	2935.83	2580.22	977.064	1051.1	1061.55	651.843							forward	0.395	-0.105	-1.13	-1.14	-1.21	-2.02
A_09_P009621	Euchromatic gene	5856.47	12612.8	18736.5	25331.4	27171.7	1089.78							forward	-0.69	-0.05	0.65	0.93	1.075	-3.48
A_09_P009736	Euchromatic gene	512.107	745.508	458.279	938.854	844.235	187.312							forward	0.3	0.53	0.135	0.95	0.875	-2.015
A_09_P009786	Euchromatic gene	10098.8	17878	30437.5	34428.9	36679.2	713.97							forward	0.285	0.675	1.095	1.065	1.11	-4.645
A_09_P009826	Euchromatic gene	734.395	61.2376	23.5194	16.9253	16.6867	11.6504							forward	3.135	-1.08	-2.265	-3.045	-3.785	-4.265
A_09_P009856	Euchromatic gene	55.4504	149.451	1734.72	3254.93	3172.3	1681.09							forward	-3.77	-2.97	0.415	0.94	0.85	0.055
A_09_P009926	Euchromatic gene	15.8233	88.6402	733.343	1484.94	1905.78	875.982							forward	-4.49	-2.745	0.335	1.375	1.6	0.3
A_09_P009936	Euchromatic gene	16986.7	30073.4	33944.5	41024.7	44129	63852.2							forward	-0.175	-0.135	-0.04	0.06	0.13	0.055
A_09_P009941	Euchromatic gene	25350.3	33944.4	51132.3	58457.6	62432	95981.7							forward	0.165	-0.04	-0.065	0.05	0.04	0.085
A_09_P009961	Euchromatic gene	2.00624	31.5211	15.6778	6.58273	9.14695	1.03433							forward	-3	2.62	-3	-3	-3	-3
A_09_P009966	Euchromatic gene	205.311	143.306	1685.48	2949.81	2015.82	640.874							forward	-1.33	-2.145	1.31	1.885	1.435	-0.275
A_09_P009986	Euchromatic gene	12772.7	1310.36	398.081	381.209	384.845	508.606							forward	1.92	-1.835	-3.195	-3.475	-3.7	-3.235
A_09_P010001	Euchromatic gene	619.837	1113.19	2475.03	4064.14	3512.3	344.423							forward	0.545	0.005	0.805	1.16	0.985	-2.39
A_09_P010006	Euchromatic gene	2.16452	8.99726	6.55843	18.6185	9.60284	5.8595							forward	-3	-1.755	-3	0.085	0.13	-1.13
A_09_P010011	Euchromatic gene	0	1.99706	1.76057	4.82049	3.76686	4.02744							forward	-3	-3	-3	-3	-3	-3
A_09_P010016	Euchromatic gene	8.13807	3.16672	4.87585	5.60311	3.17253	1.65096							forward	-3	-3	-3	-3	-3	-3
A_09_P010041	Euchromatic gene	6.50652	38.2235	424.291	852.696	771.904	356.424							forward	-6.155	-3.82	-0.255	0.525	0.33	-0.91
A_09_P010051	Euchromatic gene	4.48131	27.3376	179.907	378.445	404.784	18.3602							forward	-3.825	-0.965	1.73	2.72	2.72	-2.23
A_09_P010146	Euchromatic gene	11234.1	24207.6	23484.2	23424.9	21464.5	527.806							forward	0.085	0.63	0.645	0.455	0.315	-4.785
A_09_P010246	Euchromatic gene	2507.22	4985.23	6692.63	6247.39	4091.21	227.966							forward	0.2	0.87	1.42	1.225	0.695	-3.39
A_09_P010251	Euchromatic gene	3012.36	5480.02	6335.09	5174.81	5604.09	3216.89							forward	-0.23	0.375	0.52	0.295	0.33	-0.42
A_09_P010351	Euchromatic gene	22366.2	33826.3	21131.1	22263.6	24168.5	40556.6							forward	0.595	-0.055	-0.52	-0.705	-0.7	-0.175
A_09_P010416	Euchromatic gene	563.244	547.531	863.299	1092.31	898.672	53.8771							forward	0.08	-0.165	0.725	0.685	0.485	-4.075
A_09_P010466	Euchromatic gene	40.4116	407.291	2337.73	6720.53	10594.7	288.755							forward	-4.01	-1.265	1.045	2.16	2.705	-2.135
A_09_P010516	Euchromatic gene	844.639	1070.24	273.506	330.993	439.992	117.229							forward	0.935	0.975	-0.82	-0.775	-0.415	-2.905
A_09_P010521	Euchromatic gene	841.28	1149.85	1738.69	2511.57	3381.6	2926.97							forward	-0.605	-0.375	0.29	0.68	0.99	0.765
A_09_P010526	Euchromatic gene	2934.14	5083	6636.22	5753.74	5332.67	5644.96							forward	-0.67	-0.13	0.045	0.02	-0.085	-0.145
A_09_P010536	Euchromatic gene	20504.9	21888.1	9696.36	8167.59	6122.06	1156.2							forward	1.435	0.875	-1	-1.38	-1.77	-4.205
A_09_P010636	Euchromatic gene	5618.73	2521.44	397.753	120.917	163.929	7957.28							forward	0.355	-1.39	-3.47	-4.93	-4.665	0.3
A_09_P010706	Euchromatic gene	3.1626	116.951	307.049	941.125	1643.65	42.6516							forward	-5.805	-0.73	0.96	2.41	3.09	-2.82
A_09_P010741	Euchromatic gene	29.9592	1315	3908.75	2425.43	2320.81	1112.41							forward	-4.6	-0.08	1.515	0.88	0.76	-0.205
A_09_P010756	Euchromatic gene	60.7916	115.745	179.4	274.945	366.578	138.315							forward	-0.98	-0.83	0.04	0.455	0.785	-1.34
A_09_P010761	Euchromatic gene	1697.85	1130.55	1085.01	3527.83	6493.4	104.247							forward	-0.185	-0.865	-0.825	0.53	1.29	-4.53
A_09_P010846	Euchromatic gene	921.2	928.948	40.2943	65.6658	117.469	760.184							forward	0.64	0.445	-3.58	-3.11	-2.42	0.33
A_09_P010861	Euchromatic gene	8.3871	70.2965	20.2054	11.5752	9.03558	583.678							forward	-4.575	-1.285	-3	-5.62	-5.835	1.46
A_09_P011056	Euchromatic gene	1102.47	878.616	72.8417	90.3347	283.193	1479.66							forward	-0.25	-0.57	-3.84	-3.885	-2.08	-0.025
A_09_P011066	Euchromatic gene	780.214	2199.59	2781.15	2340.58	2065.4	255.736							forward	-0.245	0.915	1.44	1.09	0.855	-2.295
A_09_P011091	Euchromatic gene	1101.62	3023.5	2363.13	830.226	882.98	230.604							forward	0.43	1.58	1.38	0.185	0.13	-2.13
A_09_P011096	Euchromatic gene	5801.7	9176.56	5940.63	3713.42	1748.31	649.682							forward	0.62	0.97	0.185	-0.25	-1.095	-3.005
A_09_P011136	Euchromatic gene	8.2131	13.7002	4.2942	19.6342	67.6763	752.149							forward	-4.53	-4.765	-6.025	-4.095	-2.18	1.03
A_09_P011176	Euchromatic gene	35075.7	54089.2	64130.7	70494.5	76404.3	111279							forward	-0.065	-0.16	-0.175	-0.315	-0.285	-0.685
A_09_P011181	Euchromatic gene	12094.1	3466.95	2049.99	4696.29	8180.29	10200.1							forward	0.66	-2.09	-2.665	-1.61	-0.76	-0.68
A_09_P011196	Euchromatic gene	1400.24	435.443	153.346	109.481	42.3029	30.9826							forward	2.135	0.57	-1.155	-1.715	-3.3	-4.135
A_09_P011271	Euchromatic gene	5.77048	217.291	1051.16	2295.7	1925.9	871.346							forward	-7.8	-1.945	0.33	1.035	0.83	-0.295
A_09_P011276	Euchromatic gene	2.31771	119.948	591.719	1245.76	1610.73	1251.9							forward	-7.845	-2.32	0.005	0.58	0.785	0.775
A_09_P011341	Euchromatic gene	1440.63	290.747	17.9693	20.4031	72.1277	663.045							forward	0.94	-1.325	-5.245	-5.625	-3.41	-0.34
A_09_P011346	Euchromatic gene	1689.54	3230.43	3826.13	2686.75	2230.92	765.482							forward	0.25	0.925	1.13	0.62	0.41	-1.295
A_09_P011416	Euchromatic gene	6767.82	12783.3	14432.6	8347.77	6037.52	11350.4							forward	0.51	0.86	1.07	0.34	-0.18	0.455
A_09_P011421	Euchromatic gene	3086.04	5192.32	1729.81	614.551	558.498	1723.32							forward	0.57	1.015	-0.265	-1.675	-1.83	-0.355
A_09_P011471	Euchromatic gene	51.0304	179.93	1817.09	3311.18	1858.5	899.801							forward	-3.565	-2.24	0.825	1.665	0.94	-0.375
A_09_P011526	Euchromatic gene	59.576	9953.44	417.85	26.5034	17.7815	9.46753							forward	-3.065	3.04	-0.865	-4.935	-6.055	-7.375
A_09_P011536	Euchromatic gene	23065.7	30414.9	61027	63576.6	69525.2	108145							forward	-0.055	-0.045	0.045	0.005	0.075	-0.16
A_09_P011561	Euchromatic gene	25.2433	1104.81	1611.49	1409.3	1194.76	185.825							forward	-2.625	1.935	2.575	2.115	1.765	-0.88
A_09_P011566	Euchromatic gene	665.404	1755.4	1088.35	1495.16	1778.53	228.47							forward	0.45	1.465	1.045	1.22	1.365	-1.56
A_09_P011741	Euchromatic gene	10.7855	8.94803	6.81689	17.2447	10.56	24.668							forward	-0.27	-1.755	-1.29	-0.855	-1.69	0.225
A_09_P011746	Euchromatic gene	13.2705	1.92795	11.6983	15.7083	0.279669	935.786							forward	-1.49	-1.95	-0.09	-0.965	-2.885	5.695
A_09_P011771	Euchromatic gene	971.526	1565.06	6520.76	10773.2	14780.7	2936.62							forward	-2.21	-1.72	0.21	0.86	1.365	-0.905
A_09_P011781	Euchromatic gene	7.54292	76.4434	41.1918	51.6631	184.687	845.04							forward	-5.17	-1.68	-2.67	-2.58	-0.815	1.495
A_09_P011786	Euchromatic gene	2860.2	1881.99	926.552	1169.76	897.859	47.4975							forward	0.83	0.17	-0.41	-0.235	-0.595	-5.295
A_09_P011806	Euchromatic gene	10.8965	1611.36	4224.78	8406.39	7724.3	3102.29							forward	-7.2	-0.965	0.27	1.255	1.11	-0.125
A_09_P011816	Euchromatic gene	2723.52	5317.29	6605.28	3622.74	3154.26	1747.03							forward	-0.04	0.54	1.05	0.09	-0.175	-1
A_09_P011831	Euchromatic gene	3.08746	1.52284	2.89607	1.73115	2.19292	4.32111							forward	-3	-3	-3	-3	-3	-3
A_09_P011936	Euchromatic gene	6493.71	9833.4	14525.3	17247.2	18322	4330.62							forward	-0.145	0.075	0.2	0.555	0.655	-1.44
A_09_P011941	Euchromatic gene	1519.73	133.765	54.6792	70.1709	72.8605	18.603							forward	1.485	-1.775	-2.81	-2.885	-2.89	-5.235
A_09_P011946	Euchromatic gene	3710.26	7070.57	5996.89	2680.66	1849.22	7716.31							forward	-0.14	0.245	-0.03	-0.95	-1.52	0.2
A_09_P011986	Euchromatic gene	1.56233	0	3.64269	6.37525	4.18423	7.59041							forward	-3	-3	-3	-3	-3	-3
A_09_P012051	Euchromatic gene	19.1417	40.9391	101.13	255.777	640.047	933.498							forward	-3.23	-3.03	-1.355	-0.435	0.785	1.375
A_09_P012056	Euchromatic gene	460.479	48.2028	14.8975	32.5733	69.5677	86.4319							forward	2.29	-2	-3.62	-2.445	-1.445	-1.455
A_09_P012116	Euchromatic gene	47.1803	71.0795	28.6269	9.76972	7.9164	770.424							forward	-1.33	-1.305	-2.895	-4.84	-5.07	1.785
A_09_P012121	Euchromatic gene	11.5414	53.7317	56.2576	48.017	91.2197	69.6003							forward	-1.11	0.375	0.655	0.13	0.9	0.9
A_09_P012126	Euchromatic gene	14253.1	22617.5	35723.3	38773.3	42991.4	65354.2							forward	-0.48	-0.305	-0.31	-0.19	-0.12	-0.115
A_09_P012156	Euchromatic gene	911.419	1458.29	1014.19	1303.41	1153.6	170.237							forward	0.86	1.245	1.155	1.46	1.315	-2
A_09_P012161	Euchromatic gene	8801.38	726.024	407.094	431.657	342.793	471.151							forward	1.405	-2.32	-2.955	-3.16	-3.53	-3.18
A_09_P012201	Euchromatic gene	3912.12	769.972	764.821	1096.23	1536.27	867.193							forward	0.78	-1.7	-1.325	-0.985	-0.545	-1.5
A_09_P012211	Euchromatic gene	1427.23	726.293	1438.26	2194.73	2273.6	35.9745							forward	0.76	-0.175	0.8	1.205	1.165	-5.24
A_09_P012231	Euchromatic gene	9.24636	21.7655	83.2741	68.8435	56.8026	8.54585							forward	-1.06	0.03	2.36	1.67	1.235	-1.625
A_09_P012341	Euchromatic gene	6030.8	9813.43	9949.93	9824.04	12707.9	242.209							forward	0.36	0.62	0.54	0.59	0.965	-4.665
A_09_P012376	Euchromatic gene	36.5735	17.6768	12.6064	24.8908	73.9299	232.344							forward	-0.755	-3.18	-3.435	-2.94	-0.975	0.75
A_09_P012386	Euchromatic gene	1015.47	283.046	677.404	978.766	724.272	65.5813							forward	1.305	-0.625	0.855	1.065	0.685	-3.26
A_09_P012411	Euchromatic gene	12.992	48.0511	69.2921	67.474	44.8673	329.946							forward	-3.57	-2.465	-1.815	-2.29	-3.035	0.05
A_09_P012436	Euchromatic gene	66620.3	95457.8	95858.8	110523	130875	169397							forward	0.495	0.56	0.43	0.22	0.195	-0.085
A_09_P012471	Euchromatic gene	7068.28	11037	14091.5	14629.1	13417.9	4867.73							forward	-0.11	-0.035	0.255	0.335	0.18	-1.505
A_09_P012531	Euchromatic gene	22.6566	46.0244	28.2693	92.0597	208.266	281.862							forward	-3.06	-3.08	-3.24	-1.795	-0.56	-0.56
A_09_P012561	Euchromatic gene	6.66027	34.7974	5.86351	16.2675	15.7121	10.8013							forward	-1.195	0.97	-0.945	-0.315	-0.09	-0.295
A_09_P012566	Euchromatic gene	250.356	422.79	268.608	289.24	280.496	255.219							forward	0.7	0.63	0.69	0.545	0.42	0.205
A_09_P012571	Euchromatic gene	34.291	93.6427	160.028	114.37	106.946	105.951							forward	-0.975	-0.01	1.1	0.265	0.07	-0.075
A_09_P012596	Euchromatic gene	4136.03	140.135	34.2489	27.1393	38.2722	4821.3							forward	1.38	-3.375	-5.065	-5.77	-5.35	1.31
A_09_P012616	Euchromatic gene	2051.85	3036.44	2651.55	3028.09	2079.99	2361.95							forward	0.55	0.825	0.87	0.735	0.295	0.465
A_09_P012651	Euchromatic gene	4.6494	68.2252	255.397	198.56	188.117	189.179							forward	-4.255	-0.3	1.99	1.46	1.14	0.965
A_09_P012666	Euchromatic gene	4657.26	8689.48	12789.6	14405.7	14247.5	3162.86							forward	-0.41	0.075	0.37	0.48	0.46	-1.7
A_09_P012671	Euchromatic gene	2972.54	5752.07	3374.37	3678.71	4897.06	747.844							forward	0.285	0.67	0.23	0.24	0.63	-1.985
A_09_P012686	Euchromatic gene	11483.5	19986	21647.7	24425.2	24077.8	26856.2							forward	-0.185	-0.005	0.045	0.05	-0.005	-0.16
A_09_P012726	Euchromatic gene	1416.41	2946.06	2070.58	691.584	401.179	454.524							forward	0.345	1.175	1.025	-0.33	-1.11	-1.315
A_09_P012861	Euchromatic gene	661.18	1785.64	1577.38	1955.58	1893.78	1128.95							forward	0.05	0.94	1.005	1.11	1.05	0.33
A_09_P012886	Euchromatic gene	1845.45	923.959	500.784	957.647	1073.48	554.281							forward	0.735	-0.46	-0.765	-0.095	-0.085	-0.98
A_09_P012901	Euchromatic gene	1059.44	2108.62	2023.34	1209.39	1258.33	1127.04							forward	0.215	1.22	1.23	0.54	0.55	0.2
A_09_P012906	Euchromatic gene	306.61	679.237	495.892	406.505	428.787	1675.35							forward	0.085	0.67	0.71	0.575	0.62	2.1
A_09_P012931	Euchromatic gene	4352.36	5339.63	3043.28	2812.7	3789.87	4763.36							forward	-0.375	-0.545	-1.18	-1.45	-0.995	-0.79
A_09_P012936	Euchromatic gene	644.172	496.169	991.748	927.657	904.791	258.989							forward	0.885	0.25	1.43	1.14	0.97	-0.865
A_09_P012946	Euchromatic gene	3.87401	1.91579	0	1.24279	3.39054	1.4046							forward	-3	-3	-3	-3	-3	-3
A_09_P012956	Euchromatic gene	12.6948	7.02652	13.6682	9.85282	6.00165	18.6764							forward	-0.595	-0.67	-1.555	-2.175	-3.125	-2.19
A_09_P012971	Euchromatic gene	177.697	301.061	143.613	187.703	415.206	359.956							forward	-0.515	-0.275	-1.145	-0.63	0.355	-0.425
A_09_P012976	Euchromatic gene	3.50398	7.98333	44.7818	136.565	368.239	111.638							forward	-5.31	-4.905	-1.37	0.215	1.39	-0.5
A_09_P012991	Euchromatic gene	26705.9	41008.2	60660.7	74206.4	85436.2	122461							forward	-0.3	-0.24	-0.42	-0.27	-0.305	-0.215
A_09_P013001	Euchromatic gene	97.2622	194.134	248.366	221.293	162.622	2439.21							forward	-1.835	-1.43	-1.015	-1.605	-2.245	1.19
A_09_P013041	Euchromatic gene	8.58023	16.8261	13.974	19.6519	16.1873	7155.62							forward	-4.395	-4.61	-4.485	-4.355	-4.975	3.94
A_09_P013076	Euchromatic gene	1474.79	2814.56	1803.13	1541.41	1589.89	673.402							forward	0.4	1.005	0.57	0.395	0.39	-0.955
A_09_P013086	Euchromatic gene	0	1.91251	1.55529	3.52181	0	0.257028							forward	-3	-3	-3	-3	-3	-3
A_09_P013106	Euchromatic gene	1536.16	3566.22	4241.54	5881.18	6172.33	1923.11							forward	-1.295	-0.42	0.175	0.52	0.55	-0.945
A_09_P013181	Euchromatic gene	1.58605	12.2623	33.0577	49.1635	26.6883	2.68075							forward	-3	-3	2.255	2.425	0.675	-3.1
A_09_P013196	Euchromatic gene	618.765	1040.12	581.974	585.717	611.307	136.48							forward	0.685	0.945	0.75	0.705	0.65	-2.05
A_09_P013231	Euchromatic gene	644.526	245.481	139.426	517.532	1334.45	1704.06							forward	-2.19	-3.365	-4.065	-2.59	-1.34	-0.925
A_09_P013261	Euchromatic gene	13313.9	11240	3279.7	5766.21	8469.12	1589.2							forward	1.01	-0.095	-1.595	-0.88	-0.43	-2.785
A_09_P013266	Euchromatic gene	14.7671	23.7646	23.5385	24.9304	19.8436	5702.29							forward	-4.52	-4.67	-4.54	-4.915	-5.01	3.03
A_09_P013281	Euchromatic gene	11864.1	892.155	3468.34	7432.63	10434.1	12935							forward	1.055	-3.34	-1.415	-0.36	0.265	0.23
A_09_P013301	Euchromatic gene	863.11	1863.33	669.215	369.296	414.069	144.169							forward	0.62	1.57	0.255	-0.555	-0.45	-2.64
A_09_P013381	Euchromatic gene	7.21598	3.89937	3.26988	5.67862	3.98945	225.426							forward	-3.42	-4.765	-4.53	-4.16	-4.625	2.415
A_09_P013411	Euchromatic gene	22945.8	9875.09	2646.57	4364.43	8747.45	1421.45							forward	1.4	-1.1	-2.985	-2.24	-1.375	-4.08
A_09_P013421	Euchromatic gene	746.424	616.918	11.2464	15.863	17.5945	333.907							forward	2.13	1.365	-4.355	-4.62	-4.225	0.195
A_09_P013431	Euchromatic gene	2362.31	2442.58	1521.4	1376.99	1478.75	1795.09							forward	0.28	-0.01	-0.265	-0.52	-0.455	-0.29
A_09_P013461	Euchromatic gene	61.3154	88.9351	91.8498	120.673	152.712	12391.4							forward	-5.52	-5.135	-5.215	-4.925	-4.745	1.145
A_09_P013481	Euchromatic gene	3167.66	4640.99	1022.4	1671.44	2156.62	532.492							forward	0.575	0.73	-0.89	-0.545	-0.225	-2.22
A_09_P013526	Euchromatic gene	625.983	359.945	510.874	727.431	724.48	209.701							forward	0.69	-0.06	0.45	0.69	0.57	-1.32
A_09_P013531	Euchromatic gene	1.06935	12.3493	54.8335	97.3844	53.494	0.667165							forward	-1.99	-0.065	2.82	2.975	1.675	-3.285
A_09_P013536	Euchromatic gene	1.12722	19.6978	91.3589	91.5213	70.1521	658.464							forward	-6.46	-4.195	-1.505	-1.69	-2.31	1.105
A_09_P013541	Euchromatic gene	22.6684	9.49426	7.66316	10.0372	12.4438	31.9236							forward	0.34	-1.795	-1.39	-1.14	-1.88	0.675
A_09_P013546	Euchromatic gene	10.0127	31.5387	333.635	529.137	251.695	226.737							forward	-3.96	-3.33	0.405	1.185	0.04	-0.925
A_09_P013551	Euchromatic gene	5.3181	12.3934	33.1571	90.5381	74.495	207.055							forward	-3.205	-1.94	0.165	1.295	0.8	2.325
A_09_P013556	Euchromatic gene	475.643	1079.3	224.939	244.982	306.74	270.004							forward	0.82	1.425	-0.085	-0.35	-0.175	-0.465
A_09_P013561	Euchromatic gene	0.795157	0	0	1.72769	0	3.44153							forward	-3	-3	-3	-3	-3	-3
A_09_P013566	Euchromatic gene	4.4003	0.763617	2.58164	4.2552	0	0							forward	-3	-3	-3	-3	-3	-3
A_09_P013571	Euchromatic gene	0.794216	1.51019	2.1004	3.23398	0.889069	2.50139							forward	-3	-3	-3	-3	-3	-3
A_09_P013576	Euchromatic gene	25.1718	20.9606	31.3515	22.0549	14.9303	12.9453							forward	1.135	0.835	0.905	0.7	-3	-0.645
A_09_P013581	Euchromatic gene	531.025	174.619	232.313	307.236	518.988	714.1							forward	0.565	-0.81	-1.2	-0.46	0.315	-0.055
A_09_P013586	Euchromatic gene	1619.64	2881.84	2878.4	2020.45	1383.09	503.969							forward	0.24	0.73	0.995	0.785	0.245	-1.93
A_09_P013591	Euchromatic gene	2.24857	3.46712	2.51186	0	2.62983	1.05414							forward	-3	-3	-3	-3	-3	-3
A_09_P013596	Euchromatic gene	0	4.74422	2.6408	4.76049	5.19531	2.13354							forward	-3	-3	-3	-3	-3	-3
A_09_P013601	Euchromatic gene	1.6457	1.94532	0	1.22055	4.5271	0							forward	-3	-3	-3	-3	-3	-3
A_09_P013606	Euchromatic gene	6.96961	3.14695	3.45942	3.21503	4.7173	18.8385							forward	-3	-3	-3	-3	-3	2.595
A_09_P013611	Euchromatic gene	1016.03	526.521	808.676	1183.54	1286.42	1940.74							forward	-0.67	-1.475	-0.875	-0.51	-0.45	0.14
A_09_P013616	Euchromatic gene	0	1.00957	3.24818	2.17316	0.886615	1.20878							forward	-3	-3	-3	-3	-3	-3
A_09_P013621	Euchromatic gene	856.468	2086.98	1062.88	168.927	26.7885	13.371							forward	0.92	1.98	1.245	-1.365	-4.2	-5.935
A_09_P013626	Euchromatic gene	7.58601	16.0592	14.2394	11.2259	20.3966	330.351							forward	-1.93	-1.485	-1.4	-2.11	-1.6	2.55
A_09_P013631	Euchromatic gene	1.47104	5.4562	2.98926	5.85418	4.75308	164.031							forward	-3.755	-4.515	-4.905	-4.265	-4.805	2.06
A_09_P013636	Euchromatic gene	447.428	889.099	632.009	240.826	33.8938	96.675							forward	1.845	2.23	1.875	0.34	-2.955	-1.715
A_09_P013641	Euchromatic gene	4.15007	1.01106	6.59439	12.2956	6.1083	376.752							forward	-3.185	-4	-2.615	-2.71	-3.31	3.46
A_09_P013646	Euchromatic gene	51.1406	56.9591	30.9172	40.1624	27.7535	23.0902							forward	1.175	0.615	0.385	0.19	-0.505	-0.83
A_09_P013656	Euchromatic gene	1.08709	1.08822	2.52972	0	0.408979	127.851							forward	-3	-3	-3	-3	-3	4.91
A_09_P013661	Euchromatic gene	1.38946	1.64581	0.430847	4.3452	2.68031	25.7273							forward	-3	-3	-3	-3	-3	2.53
A_09_P013666	Euchromatic gene	0	4.12053	2.59887	2.52272	0	0							forward	-3	-3	-3	-3	-3	-3
A_09_P013671	Euchromatic gene	6.76887	4.70258	2.01568	9.9456	0	33.5679							forward	-3	-3	-3	-3	-3	2.055
A_09_P013676	Euchromatic gene	1.46931	1.70397	0.64458	3.47328	1.63762	0.996556							forward	-3	-3	-3	-3	-3	-3
A_09_P013681	Euchromatic gene	37.4333	17.3783	53.6153	126.338	106.155	573.932							forward	-2.5	-4.53	-2.605	-1.765	-2.08	0.21
A_09_P013686	Euchromatic gene	0.647496	6.55561	6.25233	6.23301	6.15833	33.4642							forward	-3.25	-3.88	-2.895	-3.225	-3.765	0.005
A_09_P013691	Euchromatic gene	0	0	0	5.61167	1.38773	0							forward	-3	-3	-3	-3	-3	-3
A_09_P013696	Euchromatic gene	12.0303	13.5266	17.4499	25.4597	21.3126	1301.27							forward	-6.27	-6.655	-6.33	-5.945	-6.1	-0.58
A_09_P013701	Euchromatic gene	128.387	41.2816	14.0408	28.6181	40.9479	1.59299							forward	2.865	0.375	-1.135	-0.15	0.205	-4.525
A_09_P013706	Euchromatic gene	1.95664	0	0	2.4731	2.4834	2.91545							forward	-3	-3	-3	-3	-3	-3
A_09_P013711	Euchromatic gene	0.306053	6.17081	4.74603	5.01638	0.649485	4.92213							forward	-3	-3	-3	-3	-3	-3
A_09_P013716	Euchromatic gene	0.641234	0	3.28637	1.52993	0.748866	1.86473							forward	-3	-3	-3	-3	-3	-3
A_09_P013721	Euchromatic gene	1.89609	0	0	0	2.86483	0							forward	-3	-3	-3	-3	-3	-3
A_09_P013726	Euchromatic gene	5.88494	1.54114	2.08409	1.26728	2.11223	16.844							forward	-3	-3	-3	-3	-3	2.44
A_09_P013731	Euchromatic gene	4.82189	7.54555	13.943	29.4432	19.745	563.983							forward	-2.44	-2.14	-1.14	-0.2	-0.88	4.32
A_09_P013736	Euchromatic gene	19.1968	21.2678	33.5312	54.2488	36.0209	163.718							forward	-2.205	-2.755	-1.85	-1.765	-2.425	-0.08
A_09_P013741	Euchromatic gene	6.29734	10.4316	20.3733	70.793	94.3219	1406.16							forward	-3.96	-4.06	-2.17	-0.385	-0.09	3.945
A_09_P013746	Euchromatic gene	635.466	1061.58	480.162	430.633	279.548	716.222							forward	1.125	1.45	0.625	0.25	-0.455	0.445
A_09_P013751	Euchromatic gene	7.68866	5.99764	5.47721	6.01289	8.12033	2.54349							forward	-3	-3	-3	-3	-3	-3
A_09_P013756	Euchromatic gene	9.87575	5.44085	4.60916	3.79807	4.52435	5.33363							forward	-3	-3	-3	-3	-3	-3
A_09_P013761	Euchromatic gene	956.984	2083.87	3606.68	3795.15	3103.77	2130.25							forward	-0.515	0.425	1.185	1.195	0.94	0.37
A_09_P013766	Euchromatic gene	0.542921	0	2.58315	0.868391	2.28794	0.820365							forward	-3	-3	-3	-3	-3	-3
A_09_P013771	Euchromatic gene	0	1.56581	1.09835	5.75013	4.8345	4.84994							forward	-3	-3	-3	-3	-3	-3
A_09_P013776	Euchromatic gene	10.2594	9.41798	9.28728	0.642653	1.60386	4.88719							forward	-3	-3	-3	-3	-3	-3
A_09_P013781	Euchromatic gene	3.12668	8.65546	4.79953	5.18681	4.42083	0							forward	-3	-3	-3	-3	-3	-3
A_09_P013786	Euchromatic gene	0.161512	1.33408	0.471162	1.1337	5.25873	5.3889							forward	-3	-3	-3	-3	-3	-3
A_09_P013791	Euchromatic gene	75.6163	62.5094	11.3287	12.7817	5.95365	4.35449							forward	2.675	2.115	-0.79	-1.67	-3.04	-2.99
A_09_P013806	Euchromatic gene	168.688	115.945	65.7674	68.2552	52.3349	23.0381							forward	2.285	1.225	0.615	0.075	-0.435	-1.305
A_09_P013811	Euchromatic gene	1870.84	2445.33	2726.67	4452.21	4398.52	3919.99							forward	-5.48	-5.86	-5.9	-5.22	-5.28	-5.435
A_09_P013816	Euchromatic gene	0.82953	2.93852	1.33761	4.34129	0	64.2089							forward	-2.8	-3.77	-3.715	-3.4	-4.165	1.485
A_09_P013821	Euchromatic gene	11.2833	1.41478	2.6049	4.51973	1.26476	2.79189							forward	-3	-3	-3	-3	-3	-3
A_09_P013826	Euchromatic gene	1.4031	1.67983	0.813243	4.07496	0.807324	2.5835							forward	-3	-3	-3	-3	-3	-3
A_09_P013831	Euchromatic gene	1.38235	4.99985	6.85055	17.6678	30.276	5.47879							forward	-3	-3	-3	1.465	1.63	-3
A_09_P013836	Euchromatic gene	0.573044	2.84555	0.691611	1.91941	1.84029	0.336656							forward	-3	-3	-3	-3	-3	-3
A_09_P013841	Euchromatic gene	2.7113	7.23398	2.62195	3.84204	6.94046	1019.46							forward	-3.78	-4.7	-4.12	-4.785	-4.235	4.01
A_09_P013846	Euchromatic gene	0	0	2.56862	0.099056	1.90419	0							forward	-3	-3	-3	-3	-3	-3
A_09_P013851	Euchromatic gene	5.74434	2.34559	5.22384	9.92859	7.20807	29.6421							forward	-3.935	-4.9	-4.425	-3.31	-4.42	-1.145
A_09_P013856	Euchromatic gene	0	0	0	0.842977	1.8626	2.1848							forward	-3	-3	-3	-3	-3	-3
A_09_P013861	Euchromatic gene	2.64577	3.89114	11.2829	9.87947	6.32641	207.189							forward	-2.16	-0.765	-0.99	-1.085	-3.455	3.29
A_09_P013866	Euchromatic gene	12.0763	4.15234	5.22803	11.2872	9.11479	4.13354							forward	-3	-3	-3	-0.615	-3	-3
A_09_P013871	Euchromatic gene	3.2902	4.61017	3.90836	5.52872	4.5241	0.527387							forward	-3	-3	-3	-3	-3	-3
A_09_P013876	Euchromatic gene	65.636	100.109	98.1488	109.578	91.0148	95.9797							forward	0.28	0.215	0.245	0.27	-0.245	0.16
A_09_P013886	Euchromatic gene	1.16276	0	0	2.85833	0	3.19672							forward	-3	-3	-3	-3	-3	-3
A_09_P013891	Euchromatic gene	6.43688	2.18689	7.43522	4.88965	7.06546	8.6056							forward	-3	-3	-3	-3	-3	-3
A_09_P013896	Euchromatic gene	4510.12	3909.25	1480.85	1208.21	1324.88	3598.08							forward	0.385	-0.085	-1.11	-1.545	-1.52	-0.345
A_09_P013901	Euchromatic gene	1.61503	2.73187	3.45587	3.47193	0	0.22065							forward	-3	-3	-3	-3	-3	-3
A_09_P013906	Euchromatic gene	1.293	2.40611	1.73905	4.22588	2.77496	33.0388							forward	-3	-3	-3	-3	-3	3.135
A_09_P013911	Euchromatic gene	8.82608	5.88107	4.81992	24.8598	52.5391	720.249							forward	-2.345	-4.475	-3.83	-1.39	-0.49	4.01
A_09_P013916	Euchromatic gene	8.14913	5.58976	4.78562	3.39068	8.54049	4.06289							forward	-3	-3	-3	-3	-3	-3
A_09_P013921	Euchromatic gene	267.191	394.487	213.635	164.815	106.893	14.8008							forward	1.62	1.55	1.07	0.34	-0.615	-3.775
A_09_P013926	Euchromatic gene	0.185162	0.994281	1.2549	0	1.1085	0							forward	-3	-3	-3	-3	-3	-3
A_09_P013931	Euchromatic gene	308.009	375.419	139.896	78.3376	78.9048	31.4456							forward	2.035	1.335	0.54	-0.755	-0.96	-2.38
A_09_P013936	Euchromatic gene	744.988	1461.61	1205.78	1294.33	1318.18	307.352							forward	0.33	1.02	0.845	0.775	0.77	-1.475
A_09_P013941	Euchromatic gene	0	3.74848	1.48651	0	2.49173	1.88423							forward	-3	-3	-3	-3	-3	-3
A_09_P013946	Euchromatic gene	2.05459	4.38553	12.8048	8.92163	8.26152	7.26216							forward	-3	-3	-3	-3	-3	-3
A_09_P013951	Euchromatic gene	0.0752427	0.105175	3.08397	1.53786	4.92929	6.32549							forward	-3	-3	-3	-3	-3	-3
A_09_P013956	Euchromatic gene	3.954	5.40858	4.63773	2.74713	4.25289	2.75907							forward	-3	-3	-3	-3	-3	-3
A_09_P013961	Euchromatic gene	2.61979	6.07845	2.41212	9.40995	2.23587	5.91584							forward	-3	-2.465	-3	-1.145	-1.73	-1.24
A_09_P013981	Euchromatic gene	0.689028	3.47447	0.253488	0	0	0							forward	-3	-3	-3	-3	-3	-3
A_09_P013986	Euchromatic gene	53.4	26.0884	34.442	24.293	15.6528	68.5225							forward	1.415	0.345	0.06	-0.005	-0.785	0.695
A_09_P013991	Euchromatic gene	0	3.25839	2.83019	1.74678	0	3.469							forward	-3	-3	-3	-3	-3	-3
A_09_P013996	Euchromatic gene	44.3506	73.1721	297.103	400.629	71.3751	573.233							forward	-2.645	-2.645	-0.48	-0.14	-2.815	0.01
A_09_P014001	Euchromatic gene	3.43504	3.29639	0.765354	2.58368	3.9068	2.52824							forward	-3	-3	-3	-3	-3	-3
A_09_P014006	Euchromatic gene	1.56849	4.18754	1.50621	4.15534	2.48032	1.83451							forward	-3	-3	-3	-3	-3	-3
A_09_P014011	Euchromatic gene	231.618	212.004	137.756	110.293	85.4598	2.25486							forward	2.975	2.505	1.325	0.915	0.645	-5.285
A_09_P014016	Euchromatic gene	7.22035	7.10735	8.67452	7.6301	5.6249	4.46636							forward	-1.575	-2.86	-2.875	-2.415	-3.085	-3.405
A_09_P014026	Euchromatic gene	2.13596	2.35788	3.91335	1.52131	3.11344	4.72662							forward	-3	-3	-3	-3	-3	-3
A_09_P014031	Euchromatic gene	0	0	2.46116	0	0	3.06509							forward	-3	-3	-3	-3	-3	-3
A_09_P014036	Euchromatic gene	0.350695	4.63548	0.0205774	3.16102	6.46602	0.908615							forward	-3	-3	-3	-3	-3	-3
A_09_P014041	Euchromatic gene	84.2752	43.5499	35.9508	71.9172	53.3831	3.87845							forward	2.7	1.51	1.24	1.77	1.235	-2.185
A_09_P014046	Euchromatic gene	590.47	878.241	318.515	394.344	278.829	12.0233							forward	1.985	2.01	0.725	0.71	0.085	-4.99
A_09_P014051	Euchromatic gene	7.61991	160.15	286.221	216.597	143.565	176.415							forward	-2.78	1.285	2.245	1.53	0.715	1.14
A_09_P014056	Euchromatic gene	2.32347	4.22572	13.329	23.25	10.7498	1344.02							forward	-5.085	-6.365	-3.515	-2.985	-4.785	3.135
A_09_P014061	Euchromatic gene	0.586733	3.39291	0	1.0294	4.03471	0.688774							forward	-3	-3	-3	-3	-3	-3
A_09_P014071	Euchromatic gene	0.966812	15.6147	2.32648	1.32551	3.15722	15.3703							forward	-3	-3	-3	-3	-3	-3
A_09_P014076	Euchromatic gene	0.771416	5.70068	1.35884	0.812314	0.996266	5.47275							forward	-3	-3	-3	-3	-3	-3
A_09_P014081	Euchromatic gene	1697.38	2387.57	2458.4	3335.3	3165.79	2253.06							forward	-0.36	-0.13	0.115	0.495	0.495	-0.17
A_09_P014091	Euchromatic gene	0	0.237664	1.67237	3.32774	0	1.92573							forward	-3	-3	-3	-3	-3	-3
A_09_P014096	Euchromatic gene	8.69849	52.0773	40.3704	172.035	258.885	3.82648							forward	-3.475	0.455	0.15	2.18	2.48	-3.43
A_09_P014101	Euchromatic gene	738.298	471.605	488.509	429.253	380.602	224.493							forward	-0.125	-0.99	-0.81	-1.115	-1.36	-2.25
A_09_P014106	Euchromatic gene	3.04933	2.06183	1.8945	4.34265	1.09784	2.63603							forward	-3	-3	-3	-3	-3	-3
A_09_P014111	Euchromatic gene	3.6071	2.94021	5.58682	16.0523	8.43976	8.70986							forward	-3	-3	-3	1.43	-3	-3
A_09_P014116	Euchromatic gene	237.256	346.641	254.686	540.288	600.078	199.371							forward	0.57	0.525	0.23	0.995	1.04	-0.615
A_09_P014121	Euchromatic gene	1.35797	0	1.82489	3.49453	1.03412	2.505							forward	-3	-3	-3	-3	-3	-3
A_09_P014126	Euchromatic gene	3.89906	1.94632	2.17171	3.16411	1.63684	4.65149							forward	-3	-3	-3	-3	-3	-3
A_09_P014131	Euchromatic gene	9.06505	7.11796	6.30336	8.49724	1.34455	15.3276							forward	-3	-3	-3	-3	-3	-3
A_09_P014136	Euchromatic gene	5.75656	1.8952	2.88221	0.373289	0.540464	1.71793							forward	-3	-3	-3	-3	-3	-3
A_09_P014141	Euchromatic gene	710.149	1054.03	534.288	656.137	762.041	337.461							forward	0.415	0.64	-0.015	0.175	0.395	-1.275
A_09_P014146	Euchromatic gene	141.574	40.596	39.9939	111.841	116.283	14.9361							forward	2.335	0.065	0.15	0.94	0.91	-1.86
A_09_P014151	Euchromatic gene	359.568	457.651	156.197	239.549	270.002	82.4957							forward	1.835	1.41	0.31	0.46	0.465	-1.325
A_09_P014156	Euchromatic gene	0	0	1.13666	4.11661	4.69615	4.35241							forward	-3	-3	-3	-3	-3	-3
A_09_P014161	Euchromatic gene	1442.65	1416.09	2230.12	3676.83	3869.63	1187.18							forward	-0.245	-0.35	0.24	0.825	0.905	-0.86
A_09_P014166	Euchromatic gene	1.83324	0	3.46669	0	3.16273	1.6017							forward	-3	-3	-3	-3	-3	-3
A_09_P014176	Euchromatic gene	2.9078	4.94752	5.45183	2.1453	3.77554	1.30818							forward	-1.315	-1.92	-1.665	-2.34	-1.79	-2.81
A_09_P014181	Euchromatic gene	3.9507	3.50083	10.6353	16.555	11.9617	10.7042							forward	-2.03	-2.85	-0.62	-0.85	-1.59	-0.815
A_09_P014186	Euchromatic gene	2.2045	8.72585	2.94295	5.68808	7.84266	84.1817							forward	-3.375	-3.485	-3.525	-3.965	-3.155	0.935
A_09_P014191	Euchromatic gene	3057	3902.03	2731.47	3062.25	2628.06	1752.13							forward	0.625	0.65	0.385	0.515	0.255	-0.34
A_09_P014196	Euchromatic gene	8.54406	5.06686	8.28863	3.93436	3.81402	8.13961							forward	-3	-3	-3	-3	-3	-0.135
A_09_P014201	Euchromatic gene	4.22872	3.96323	2.06652	2.54358	1.21436	42.3046							forward	-1.445	-2.035	-2.025	-3	-3	1.89
A_09_P014206	Euchromatic gene	0.862447	1.57407	2.58048	1.30606	9.27939	10.9897							forward	-3	-3	-3	-3	-3	-3
A_09_P014211	Euchromatic gene	2272.99	3597.44	1197.96	957.146	913.075	1047.23							forward	0.485	0.905	-0.085	-0.53	-0.565	-0.49
A_09_P014216	Euchromatic gene	6.09464	144.281	311.734	224.29	164.448	3189.27							forward	-6.32	-2.05	-1.005	-1.625	-2.075	1.88
A_09_P014221	Euchromatic gene	6.73014	3.15379	2.24667	31.5036	99.1787	551.381							forward	-4	-4.59	-4.51	-1.305	0.455	3.285
A_09_P014226	Euchromatic gene	0	2.96797	1.38118	23.3163	63.0948	361.336							forward	-2.765	-3.74	-4.1	-0.425	0.88	3.955
A_09_P014231	Euchromatic gene	4.2926	4.24024	0	2.93471	8.77584	14.0123							forward	-3	-3	-3	-3	-3	-3
A_09_P014241	Euchromatic gene	0.621747	69.1722	328.973	428.004	301.795	15.328							forward	-3.68	0.785	3.32	3.085	2.505	-2.065
A_09_P015631	Euchromatic gene	3.64016	5.47599	0	0.258339	4.15657	0							forward	-3	-3	-3	-3	-3	-3
A_09_P016556	Euchromatic gene	12.993	52.0528	80.5671	81.9795	56.8509	4.61321							forward	-0.32	1.945	2.695	2.67	1.775	-2.515
A_09_P016561	Euchromatic gene	3.08683	0	3.12697	5.92754	11.1501	7.83952							forward	-1.745	-2.33	-2.105	-3	0.125	-0.855
A_09_P016566	Euchromatic gene	0.829692	0	0.269382	1.8506	0.88377	2.01138							forward	-3	-3	-3	-3	-3	-3
A_09_P016646	Euchromatic gene	4.37954	9.76233	52.0829	38.745	41.9892	10.4564							forward	-2.75	-1.745	1.24	0.845	0.785	-1.37
A_09_P016651	Euchromatic gene	6.22267	38.6268	70.1213	129.191	118.842	101.318							forward	-2.935	-0.61	0.835	1.36	1.1	1.07
A_09_P016656	Euchromatic gene	6.2471	410.857	5451.61	9122.74	6048.22	2661.38							forward	-7.295	-2.165	1.495	2.075	1.535	0.695
A_09_P016661	Euchromatic gene	4.59136	1.01489	3.92087	5.47201	4.86233	1.03272							forward	-3	-3	-3	-3	-3	-3
A_09_P016666	Euchromatic gene	1.04509	0.0191807	0	0.296626	0	3.63803							forward	-3	-3	-3	-3	-3	-3
A_09_P016671	Euchromatic gene	0.111768	1.43234	1.57304	2.04375	3.98711	0							forward	-3	-3	-3	-3	-3	-3
A_09_P016676	Euchromatic gene	10.0618	4.76527	5.65937	5.54061	4.91268	6.46406							forward	-3	-3	-3	-3	-3	-3
A_09_P016681	Euchromatic gene	2.52582	0.054187	0	5.57371	3.92812	0.943812							forward	-3	-3	-3	-3	-3	-3
A_09_P016686	Euchromatic gene	7.11704	5.34997	0	0	6.67467	7.68822							forward	-3	-3	-3	-3	-3	-3
A_09_P016691	Euchromatic gene	2347.34	2563.38	2491.01	3319.98	3497.88	3503.98							forward	-0.445	-0.465	-0.35	-0.075	0	-0.075
A_09_P016696	Euchromatic gene	8.79066	17.2739	23.6048	18.0178	28.0336	9.96853							forward	-5.28	-4.515	-4.175	-4.75	-4.355	-6.13
A_09_P016851	Euchromatic gene	6014.67	11908.1	15874.4	13535.9	12017.7	6731.36							forward	-0.44	-0.065	0.28	0.19	0.025	-1.315
A_09_P016856	Euchromatic gene	996.14	1587.87	2244.97	3750.48	4958.68	836.299							forward	-0.205	0.305	0.675	1.325	1.6	-0.92
A_09_P016861	Euchromatic gene	0.665521	0.375717	0	4.85592	2.21423	3.36328							forward	-3	-3	-3	-3	-3	-3
A_09_P016866	Euchromatic gene	2.99503	4.46481	3.00673	3.72961	6.59425	11.1089							forward	-3.32	-4.43	-4.465	-4.045	-3.97	-1.8
A_09_P016871	Euchromatic gene	0	4.70164	3.39895	3.71133	4.347	4.75702							forward	-3	-3	-3	-3	-3	-3
A_09_P016876	Euchromatic gene	5668.82	1557.61	806.802	2061.11	3391.15	4855.9							forward	0.665	-1.59	-2.47	-1.28	-0.625	-0.26
A_09_P016886	Euchromatic gene	2.19258	0	0	2.71321	0.99126	2.03314							forward	-3	-3	-3	-3	-3	-3
A_09_P016891	Euchromatic gene	4.23789	5.34204	4.8973	26.9907	7.22769	825.771							forward	-7.075	-7.01	-6.44	-4.895	-6.48	0.97
A_09_P016896	Euchromatic gene	9.9158	13.1702	10.0413	14.1159	15.2797	3450.17							forward	-4.2	-5.015	-4.825	-5.03	-4.985	3.535
A_09_P016901	Euchromatic gene	8.02304	23.6656	15.5592	33.1275	73.131	4637.28							forward	-3.705	-3.01	-3.45	-2.88	-1.7	4.175
A_09_P017071	Euchromatic gene	1.94455	5.03554	10.4363	9.88964	9.17575	0							forward	-3	-3	-3	-3	-3	-3
A_09_P017076	Euchromatic gene	308.717	488.095	476.871	638.646	1159.12	14060.1							forward	-2.86	-2.23	-2.085	-1.64	-0.87	1.735
A_09_P017391	Euchromatic gene	0.263641	3.14412	1.58521	9.612	64.4881	557.346							forward	-4.47	-5.43	-4.82	-4.23	-0.665	2.78
A_09_P017396	Euchromatic gene	9.56766	7.65941	3.77437	0	6.85578	46.08							forward	-3	-3	-3	-3	-3	2.35
A_09_P017456	Euchromatic gene	0.0687701	4.44837	6.83787	4.83076	5.13595	7.51912							forward	-3	-3	-3	-3	-3	-3
A_09_P017461	Euchromatic gene	4.41609	0.653982	1.61904	1.80128	1.1292	0.199423							forward	-3	-3	-3	-3	-3	-3
A_09_P017466	Euchromatic gene	4.0757	2.84386	6.52093	7.06056	8.79507	85.7365							forward	-2.665	-3.295	-4.555	-3.68	-3.515	-0.265
A_09_P017471	Euchromatic gene	34.3833	41.2466	51.3272	65.7499	43.8342	1948.09							forward	-1.32	-1.935	-1.605	-1.575	-2.065	2.265
A_09_P017476	Euchromatic gene	4.23662	4.08517	4.13917	6.86301	5.57397	398.375							forward	-3.445	-4.07	-4.49	-4.01	-4.43	3.55
A_09_P017481	Euchromatic gene	105.694	189.698	205.589	223.145	186.674	19578.2							forward	-3.15	-2.62	-2.585	-2.51	-2.71	2.655
A_09_P017486	Euchromatic gene	0.206813	1.73769	1.44246	3.9642	1.73988	1.87638							forward	-3	-3	-3	-3	-3	-3
A_09_P017491	Euchromatic gene	2.85358	1.68509	1.68879	2.95246	0.950667	1000.07							forward	-2.475	-3.12	-3.36	-3.2	-3.41	5.875
A_09_P017496	Euchromatic gene	0.875811	4.12191	6.47448	6.62891	6.62344	816.117							forward	-3.07	-4.09	-3.675	-3.295	-3.685	4.58
A_09_P017501	Euchromatic gene	0	1.33503	2.70031	2.53713	2.21734	0.765536							forward	-3	-3	-3	-3	-3	-3
A_09_P017506	Euchromatic gene	0	0	2.21369	0.487968	2.0441	2.29502							forward	-3	-3	-3	-3	-3	-3
A_09_P017511	Euchromatic gene	37.2135	31.9479	30.3241	24.9503	22.4381	7.51006							forward	1.53	1.545	1.205	0.33	-0.18	-1.495
A_09_P017516	Euchromatic gene	8.13003	8.96927	5.7078	3.83188	8.13791	3.86139							forward	-3	-3	-3	-3	-3	-3
A_09_P017691	Euchromatic gene	0	0.369379	0	0.519534	6.65016	0							forward	-3	-3	-3	-3	-3	-3
A_09_P017782	Euchromatic gene	404.55	612.633	661.014	299.918	214.837	39.4022							forward	1.515	1.76	1.545	1.295	0.665	-3.335
A_09_P017786	Euchromatic gene	5.36856	11.603	13.8115	19.9239	13.9377	58.6127							forward	-2.75	-2.855	-1.73	-1.72	-2.57	0.275
A_09_P017791	Euchromatic gene	5645.91	3175.84	127.301	80.3388	46.6371	5397.62							forward	0.81	-0.445	-4.43	-5.12	-5.81	0.45
A_09_P017796	Euchromatic gene	0.196258	4.56905	4.86739	4.87511	0.98053	6.69397							forward	-3	-3	-3	-3	-3	-3
A_09_P017801	Euchromatic gene	1623.16	3401.84	4275.33	4283.77	4331.86	620.126							forward	-0.26	0.435	1.12	0.98	1.075	-1.695
A_09_P017806	Euchromatic gene	2611.09	406.24	1001.57	1911.9	2039.09	243.99							forward	1.185	-1.245	0.055	0.865	0.93	-2.525
A_09_P017811	Euchromatic gene	4.61949	12.204	12.6618	7.99241	13.2493	26.0808							forward	-1.56	-0.82	-0.575	-1.145	-1.205	0.29
A_09_P017816	Euchromatic gene	4.62203	8.91244	13.5882	28.7129	12.9108	124.817							forward	-5.27	-5.615	-5.1	-4.37	-5.8	-2.17
A_09_P017821	Euchromatic gene	2072.52	1270.7	712.908	1702.04	2139.95	1191.39							forward	0.575	-0.1	-0.65	0.175	0.49	-0.32
A_09_P017826	Euchromatic gene	116.993	267.467	380.811	530.216	457.287	156.21							forward	0.02	0.3	1.15	1.135	0.93	-0.845
A_09_P017831	Euchromatic gene	0.702537	7.03892	11.0869	13.6182	18.0282	4.30012							forward	-3	-3	-3	-3	-0.07	-3
A_09_P017836	Euchromatic gene	1516.33	157.779	101.648	318.678	358.87	337.732							forward	1.585	-1.465	-1.99	-0.635	-0.505	-0.875
A_09_P017841	Euchromatic gene	3070.98	5397.47	6503.04	6953.28	6037.87	6832.79							forward	-0.485	-0.05	0.195	0.265	0.015	0.295
A_09_P017846	Euchromatic gene	5197.66	6375.45	6895.78	8224.69	8558.49	1830.7							forward	0.33	0.325	0.395	0.46	0.485	-1.56
A_09_P017851	Euchromatic gene	51.5526	27.2517	42.6432	27.3926	29.152	4.09463							forward	2.04	0.84	1.625	0.765	0.56	-2.525
A_09_P017856	Euchromatic gene	3190.5	2902.72	1026.27	1050.29	705.097	2095.75							forward	0.445	0.02	-1.385	-1.45	-1.965	-0.635
A_09_P017861	Euchromatic gene	10.4459	23.1449	19.7044	43.6749	52.1316	516.733							forward	-3.83	-3.785	-3.97	-2.91	-2.645	0.4
A_09_P017866	Euchromatic gene	938.562	1773.07	170.731	204.006	236.415	264.325							forward	0.825	1.41	-1.155	-1.17	-1.085	-1.105
A_09_P017871	Euchromatic gene	0	1.05722	7.26697	0.5311	0	4.01343							forward	-3	-3	-3	-3	-3	-3
A_09_P017876	Euchromatic gene	1953.55	1362.34	3548.15	3835.47	2773.71	1600.32							forward	0.015	-0.645	0.78	0.705	0.17	-0.345
A_09_P017881	Euchromatic gene	0	3.46933	4.75781	4.12538	0.35323	2.41439							forward	-3	-3	-3	-3	-3	-0.64
A_09_P017886	Euchromatic gene	0.189829	5.45338	8.44379	8.65942	2.58124	9.30105							forward	-3	-1	-3	-3	-3	0.32
A_09_P017891	Euchromatic gene	4797.37	7691.63	4656.19	3397.41	3155.23	4510.64							forward	0.155	0.4	-0.225	-0.675	-0.785	-0.455
A_09_P017896	Euchromatic gene	3991.97	7519.76	5474.28	2589.99	2899.24	5424.31							forward	-0.115	0.315	0.085	-0.825	-0.72	0.065
A_09_P017901	Euchromatic gene	1075.84	332.602	876.379	1337.56	1371.49	147.196							forward	0.39	-1.165	0.285	0.435	0.425	-2.775
A_09_P017906	Euchromatic gene	599.467	901.799	512.424	477.802	233.621	261.349							forward	0.985	1.475	1.115	0.395	-0.84	-0.795
A_09_P017911	Euchromatic gene	32.2622	323.527	1137.99	3002.26	5020.66	1544.01							forward	-5.325	-2.54	-0.96	0.23	0.9	-0.54
A_09_P017916	Euchromatic gene	863.724	1049.76	492.462	370.667	222.678	113.915							forward	0.955	1.275	0.07	-0.39	-1.13	-2.525
A_09_P017921	Euchromatic gene	2.1206	0	1.71645	0	2.81805	119.046							forward	-2.89	-3.255	-3.61	-3.06	-3.29	2.505
A_09_P017926	Euchromatic gene	6.70883	2.49723	3.47803	14.5003	11.8327	15788.1							forward	-5.1	-6.975	-7.54	-6.17	-6.395	4.855
A_09_P017931	Euchromatic gene	1054.24	293.76	1085.38	1702.28	1239.14	537.863							forward	0.515	-1.19	0.555	0.94	0.475	-0.725
A_09_P017936	Euchromatic gene	7.25866	34.9568	172.702	136.537	89.8438	657.136							forward	-4.545	-3	-0.285	-0.92	-1.605	1.025
A_09_P017941	Euchromatic gene	927.247	1573.02	1520.68	1972.72	1773.92	41.5538							forward	0.63	1.195	1.275	1.575	1.335	-4.8
A_09_P017946	Euchromatic gene	1217.7	2268.94	2211.6	2468.04	1839.5	856.198							forward	0.085	0.81	0.995	0.905	0.48	-0.47
A_09_P017951	Euchromatic gene	3.12404	3.37203	12.1986	29.6133	20.5445	6.3101							forward	-2.35	-2.26	-0.36	0.765	-0.055	-1.345
A_09_P017966	Euchromatic gene	10.9535	128.054	418.049	614.642	627.699	625.635							forward	-4.56	-1.845	0.025	0.095	-0.025	0.13
A_09_P017971	Euchromatic gene	26.2766	6.82911	4.09923	7.4648	4.13585	14.8723							forward	0.445	-1.605	-3.07	-2.625	-3.425	0.13
A_09_P017976	Euchromatic gene	2245.88	4657.91	5986.38	4857.12	4523.72	1904.37							forward	-1.015	-0.395	-0.135	-0.185	-0.295	-1.675
A_09_P017981	Euchromatic gene	15.4519	10.3074	13.2341	18.8331	34.7906	61.5258							forward	-1.95	-2.6	-2.33	-2.2	-1.49	-0.605
A_09_P017986	Euchromatic gene	19.8147	8.78441	1.56068	3.02409	5.91374	4.30662							forward	0.275	-1.32	-1.815	-2.75	-2.86	-2.25
A_09_P017991	Euchromatic gene	6724.18	768.617	364.606	401.955	319.348	6928.77							forward	1.205	-2.225	-2.815	-2.915	-3.36	0.885
A_09_P017996	Euchromatic gene	12.7045	14.403	24.6751	19.6905	17.9277	6.8705							forward	-3	0.855	1.195	0.42	0.455	-0.855
A_09_P018001	Euchromatic gene	508.41	279.346	328.901	727.113	846.325	651.645							forward	0.305	-0.66	-0.22	0.415	0.54	0.24
A_09_P018006	Euchromatic gene	966.654	1921.68	2960.34	3328.58	2840.08	472.666							forward	-0.64	0.3	0.925	0.775	0.575	-1.625
A_09_P018011	Euchromatic gene	4067.45	214.761	395.748	541.778	678.202	563.18							forward	1.525	-2.55	-1.51	-1.19	-0.985	-1.515
A_09_P018016	Euchromatic gene	2613.97	3829.91	2315.41	2780.56	2944.46	2109.8							forward	-0.345	-0.21	-0.48	-0.405	-0.345	-0.77
A_09_P018021	Euchromatic gene	1322.23	3010.06	2789.21	2625.36	2686.72	551.819							forward	-0.3	0.51	0.62	0.475	0.5	-1.94
A_09_P018026	Euchromatic gene	1.37786	3.6571	2.6318	7.57222	4.66647	0.878936							forward	-3	-3	-3	-3	-3	-3
A_09_P018031	Euchromatic gene	10.2145	6.76036	6.00421	11.2015	12.5747	224.708							forward	-1.445	-2.75	-3.275	-3.37	-2.45	1.975
A_09_P018036	Euchromatic gene	4.87751	4.04971	4.19446	7.08972	8.3039	5783.44							forward	-2.53	-3.275	-3.075	-3.14	-3.305	6.005
A_09_P018041	Euchromatic gene	55.5423	46.889	51.5199	33.722	36.9124	1513.89							forward	0.21	-0.69	-0.675	-1.555	-1.49	3.795
A_09_P018046	Euchromatic gene	0	4.1853	2.53643	0	6.61464	4.26745							forward	-3	-3	-3	-3	-3	-3
A_09_P018051	Euchromatic gene	640.407	1292.23	1074.96	1286.84	1206.5	619.021							forward	0.43	1.21	0.85	0.885	0.645	-0.38
A_09_P018056	Euchromatic gene	198.032	9.04047	18.3353	21.8152	27.8025	9.09617							forward	2.915	-2.6	-0.965	-0.895	-1.365	-2.875
A_09_P018061	Euchromatic gene	1.96942	7.38584	2.401	1.25239	2.38551	3.49874							forward	-3	-3	-3	-3	-3	-3
A_09_P018066	Euchromatic gene	514.532	987.667	148.199	144.447	90.5744	112.014							forward	1.26	1.645	-0.775	-1.065	-1.765	-2.15
A_09_P018071	Euchromatic gene	376.907	940.324	979.317	866.365	661.78	538.1							forward	-0.23	0.455	0.85	0.525	0.18	-0.745
A_09_P018076	Euchromatic gene	187.04	40.5455	71.3908	54.7667	52.6203	14.0897							forward	2.295	-0.975	0.885	-0.36	-0.46	-2.49
A_09_P018081	Euchromatic gene	1755.77	504.007	1740.27	2975.6	2601.11	563.715							forward	0.52	-1.18	0.64	1.015	0.84	-1.275
A_09_P018086	Euchromatic gene	12.7285	6.96875	7.41153	9.26203	12.8235	16.924							forward	-1.4	-2.03	-2.36	-3.27	-2.86	-1.32
A_09_P018091	Euchromatic gene	25.8929	28.3152	18.0196	25.6882	9.50909	113.11							forward	-1.09	-2	-2.3	-2.56	-3.76	0.3
A_09_P018096	Euchromatic gene	0.870036	3.02292	1.10985	5.35931	2.74752	3.37385							forward	-3	-3	-3	-3	-3	-3
A_09_P018101	Euchromatic gene	2.23143	2.84123	2.58235	10.3312	6.62984	283.806							forward	-3.945	-4.59	-5.05	-4.215	-4.605	2.44
A_09_P018106	Euchromatic gene	7.11867	11.2373	20.423	31.0067	29.2242	10670.6							forward	-6.495	-5.1	-4.28	-3.715	-4.06	4.865
A_09_P018111	Euchromatic gene	1.10012	0.189607	0	1.07932	0.811012	1.20209							forward	-3	-3	-3	-3	-3	-3
A_09_P018116	Euchromatic gene	5.95873	29.7427	121.863	300.537	308.493	192.634							forward	-3.72	-1.51	0.66	1.69	1.65	0.95
A_09_P018121	Euchromatic gene	819.438	2038.39	1800.72	1530.32	1422.43	725.256							forward	-0.035	0.785	0.995	0.7	0.53	-0.54
A_09_P018126	Euchromatic gene	11.1547	9.64031	5.90538	6.02154	5.93696	65.8899							forward	-0.955	-2.145	-1.95	-2.87	-2.585	1.705
A_09_P018131	Euchromatic gene	785.014	1030.63	78.6358	119.907	247.268	794.479							forward	0.525	0.71	-2.815	-2.39	-1.325	0.195
A_09_P018136	Euchromatic gene	0	2.14517	2.35631	1.24064	2.1688	12.7006							forward	-3	-3	-3	-3	-3	-3
A_09_P018141	Euchromatic gene	2.34072	0.173536	0	1.84753	4.23343	2.12528							forward	-3	-3	-3	-3	-3	-3
A_09_P018146	Euchromatic gene	2037.67	980.42	1357.86	1284.36	1383.75	1720.78							forward	0.33	-0.865	-0.315	-0.54	-0.435	-0.225
A_09_P018151	Euchromatic gene	3.78334	0	6.5254	7.71797	2.76397	5.22127							forward	-3	-3	-3	-3	-3	-3
A_09_P018156	Euchromatic gene	1.3685	2.38653	5.80061	3.12987	3.64858	277.183							forward	-3.135	-4.035	-3.04	-3.765	-4.095	3.395
A_09_P018161	Euchromatic gene	23.4502	33.2538	31.8114	69.4238	44.9176	9905.46							forward	-5.695	-5.775	-5.71	-4.785	-5.5	2.1
A_09_P018166	Euchromatic gene	479.27	968.834	816.716	712.694	372.793	216.077							forward	0.61	1.22	1.115	0.695	-0.24	-1.39
A_09_P018171	Euchromatic gene	1029.82	1879.69	1463.16	1488.28	1101.73	77.5209							forward	0.8	1.445	1.18	0.915	0.49	-3.51
A_09_P018176	Euchromatic gene	65.1724	48.8441	50.0088	62.7915	43.9389	10.0564							forward	2.025	1.8	1.365	0.94	-0.02	-1.66
A_09_P018181	Euchromatic gene	4368.7	1301.48	1773.54	2878.43	2766.88	4050.94							forward	0.535	-1.48	-0.94	-0.505	-0.545	-0.075
A_09_P018186	Euchromatic gene	76.5565	121.028	122.776	200.115	138.35	975.576							forward	-5.35	-4.74	-4.75	-4.32	-4.91	-2.265
A_09_P018191	Euchromatic gene	1078.74	2299.61	1850.24	1390.07	1249.9	2305.02							forward	-0.84	-0.085	-0.475	-0.79	-0.925	-0.42
A_09_P018196	Euchromatic gene	1416.26	2920.6	2918.85	2243.66	1193.44	747.213							forward	0.3	1	1.155	0.715	-0.05	-0.7
A_09_P018201	Euchromatic gene	1055.23	189.961	109.847	359.947	1027.14	611.698							forward	1.33	-1.095	-1.705	-0.455	0.87	0.295
A_09_P018206	Euchromatic gene	1940.26	3113.4	2962.96	3568.66	3493.24	1368.1							forward	-0.12	0.36	0.48	0.645	0.68	-0.76
A_09_P018211	Euchromatic gene	1352.48	582.063	1886.36	2502.36	2543.26	1205.93							forward	0.405	-0.73	0.69	0.745	0.71	-0.36
A_09_P018216	Euchromatic gene	1581.04	2250.23	2328.68	2790.98	2547.62	427.652							forward	0.225	0.405	0.66	0.76	0.58	-1.89
A_09_P018221	Euchromatic gene	1079.41	2122.4	1526.36	2211.93	2204.62	938.452							forward	-0.125	0.65	0.395	0.605	0.59	-0.4
A_09_P018226	Euchromatic gene	109.499	29.4987	13.5732	15.7575	8.90247	4184.6							forward	-1.18	-3.645	-5.345	-5.875	-5.76	3.11
A_09_P018231	Euchromatic gene	4.59163	27.9133	28.4079	9.96513	8.06648	2.19441							forward	-3	2.975	3.165	-3	-3	-3
A_09_P018236	Euchromatic gene	8.10742	6.89344	3.55672	3.23953	6.6795	52.4321							forward	-1.835	-3.425	-4.285	-3.705	-3.255	0.7
A_09_P018241	Euchromatic gene	0	0	0.849462	1.42663	0	1.93455							forward	-3	-3	-3	-3	-3	-3
A_09_P018246	Euchromatic gene	3.30525	5.06014	5.86978	5.04575	5.12644	7.45282							forward	-3	-1.055	-3	-3	-3	-3
A_09_P018251	Euchromatic gene	15.1545	18.376	16.3275	19.1109	22.0963	1250.47							forward	-3.055	-3.765	-3.625	-3.775	-3.78	2.47
A_09_P018256	Euchromatic gene	2.31509	0.0284393	0.880435	4.28298	3.56776	0							forward	-3	-3	-3	-3	-3	-3
A_09_P018261	Euchromatic gene	0.303153	2.26705	0	0.230152	3.32389	0.243291							forward	-3	-3	-3	-3	-3	-3
A_09_P018266	Euchromatic gene	6.14717	4.01563	4.33208	2.17318	6.44692	9.11769							forward	-3	-3	-3	-3	-3	-3
A_09_P018271	Euchromatic gene	4.64518	4.0732	2.33589	1.70282	3.29533	10.5413							forward	-3	-3	-3	-3	-3	-3
A_09_P018276	Euchromatic gene	15.0526	17.7717	53.4593	113.526	84.4822	16.9734							forward	-0.625	-0.89	1.14	1.87	1.55	-0.925
A_09_P018281	Euchromatic gene	7.97418	8.40647	8.732	16.9414	15.2525	9.34277							forward	-3	-0.62	0.28	1.23	0.85	0.13
A_09_P018286	Euchromatic gene	2749.1	2091.07	3275.63	4495.3	3056.5	1255.85							forward	0.535	-0.205	0.71	0.99	0.46	-0.885
A_09_P018291	Euchromatic gene	6.45208	118.856	60.7148	21.4933	14.125	2.43585							forward	-3	3.99	2.66	0.825	0.09	-3
A_09_P018296	Euchromatic gene	2.3859	2.83814	7.32695	5.56416	24.1355	6.93747							forward	-3	-3	-3	-3	3.07	-3
A_09_P018306	Euchromatic gene	10.6797	8.95605	8.89693	7.78538	4.62145	85.4034							forward	-2.4	-3.645	-2.955	-3.77	-3.93	0.775
A_09_P018311	Euchromatic gene	1320.02	1960.84	236.73	245.586	254.991	143.196							forward	1.235	1.51	-1.175	-1.32	-1.27	-2.585
A_09_P018316	Euchromatic gene	308.186	167.867	620.315	995.922	1041.75	384.443							forward	0.22	-1.175	0.69	1.14	1.115	-0.58
A_09_P018326	Euchromatic gene	486.283	403.076	239.87	363.053	402.413	245.326							forward	0.89	-0.03	-0.355	-0.285	-0.205	-1.1
A_09_P018331	Euchromatic gene	488.528	153.096	242.443	296.181	389.299	540.053							forward	1.23	-0.8	-0.215	0.1	0.305	0.505
A_09_P018336	Euchromatic gene	1381.5	2545.91	2644.08	1893.16	1071.56	1848.82							forward	-0.015	0.495	0.64	0.17	-0.52	0.03
A_09_P018341	Euchromatic gene	236.538	438.137	418.728	478.832	355.738	273.321							forward	1.235	1.48	1.28	1.435	0.87	0.075
A_09_P018346	Euchromatic gene	189.744	20.2955	10.8065	38.5035	79.4515	501.825							forward	0.21	-4.08	-4.655	-3.205	-2.07	0.695
A_09_P018351	Euchromatic gene	9.98689	6.88065	6.12628	0.886641	4.1231	9.70913							forward	-3	-3	-3	-3	-3	-3
A_09_P018356	Euchromatic gene	6.29131	4.13173	15.587	20.511	17.5968	3.86862							forward	-3	-3	-3	2.675	2.65	-3
A_09_P018361	Euchromatic gene	0	0.884868	0	4.53177	1.82914	4.39015							forward	-3	-3	-3	-3	-3	-3
A_09_P018366	Euchromatic gene	5.59072	7.20371	9.18166	4.93459	6.49364	10.7111							forward	-3	-3	-3	-3	-3	-0.035
A_09_P018371	Euchromatic gene	1.75901	0	1.17767	3.28722	0.302095	1.43554							forward	-3	-3	-3	-3	-3	-3
A_09_P018376	Euchromatic gene	1417.84	1949.58	223.204	529.702	924.54	1856.6							forward	0.1	0.29	-1.935	-0.76	-0.09	0.515
A_09_P018381	Euchromatic gene	3.02844	71.9192	305.665	465.735	465.423	31.3894							forward	-5.135	-1.365	1.97	2.145	2.13	-2.18
A_09_P018386	Euchromatic gene	3174.13	406.996	2144.15	4542.97	5603.82	2167.59							forward	-0.05	-2.85	-0.665	0.255	0.51	-0.7
A_09_P018391	Euchromatic gene	61.5291	21.3104	3.63055	2.7719	11.1571	3.54897							forward	2.16	0.065	-1.765	-2.39	-1.965	-2.655
A_09_P018401	Euchromatic gene	1560.79	385.449	852.162	1546.12	1834.41	789.651							forward	0.32	-1.63	-0.315	0.21	0.385	-0.575
A_09_P018406	Euchromatic gene	7213.35	14362.9	10517.5	6245.46	2211.71	5836.33							forward	0.5	0.83	0.565	-0.465	-1.85	-0.535
A_09_P018411	Euchromatic gene	1466.03	666.935	79.8297	96.3038	149.122	254.843							forward	1.37	0.57	-2.27	-2.415	-1.925	-1.2
A_09_P018421	Euchromatic gene	2.49219	2.34607	1.46532	4.22352	92.6912	126.018							forward	-3.34	-4.36	-4.315	-3.735	1.26	1.925
A_09_P018431	Euchromatic gene	2314.07	2028.5	3566.93	5182.52	3210.39	367.795							forward	0.38	0.13	1.06	1.4	0.955	-2.325
A_09_P018436	Euchromatic gene	3615.69	896.142	731.699	1068.05	1126.31	726.376							forward	1.35	-0.705	-0.855	-0.61	-0.57	-1.12
A_09_P018441	Euchromatic gene	98.2868	18679.3	1175.87	238.587	289.71	108.587							forward	-3.455	3.045	-0.12	-2.37	-2.15	-4.04
A_09_P018446	Euchromatic gene	1978.03	2165.57	1865.53	1848.93	1694.72	988.329							forward	0.275	0.095	0.27	0.21	0.12	-0.81
A_09_P018451	Euchromatic gene	37.7006	15.3579	12.7072	15.403	6.41977	4.86927							forward	2.69	-3	0.215	0.495	-1.195	-1.56
A_09_P018456	Euchromatic gene	6.85372	24.0214	17.0798	16.0661	48.0706	101.887							forward	-2.95	-0.885	-1.05	-1.975	-0.11	1.51
A_09_P018461	Euchromatic gene	572.02	1132.81	502.791	386.459	342.626	55.6173							forward	1.605	2.02	1.01	0.45	0.185	-3.015
A_09_P018466	Euchromatic gene	955.966	2730.29	3768.97	4678.64	3862.32	1053.92							forward	-0.935	0.21	0.825	0.955	0.72	-1.01
A_09_P018471	Euchromatic gene	1937.91	3501.52	495.256	459.862	1319.85	4577.28							forward	0.445	0.97	-1.225	-1.57	-0.125	1.59
A_09_P018476	Euchromatic gene	667.926	171.824	434.366	1159.44	1843.91	118.921							forward	0.34	-1.73	-0.24	0.95	1.425	-2.72
A_09_P018481	Euchromatic gene	2213.51	491.854	57.1169	49.4244	38.3627	679.352							forward	1.705	-0.305	-3.18	-3.705	-4.21	-0.03
A_09_P018486	Euchromatic gene	0	2.10556	2.18795	0.475535	4.63101	1.80513							forward	-3	-3	-3	-3	-3	-3
A_09_P018491	Euchromatic gene	1.22183	0	1.96612	2.07066	3.03615	0.0460515							forward	-3	-3	-3	-3	-3	-3
A_09_P018496	Euchromatic gene	1526.9	1493.88	782.295	862.197	1410.5	1844.34							forward	-0.655	-0.9	-1.665	-1.415	-0.81	-0.605
A_09_P018501	Euchromatic gene	5.51643	4.91799	3.27793	3.74115	3.2587	4.08409							forward	-3	-3	-3	-3	-3	-3
A_09_P018506	Euchromatic gene	2.54408	1.35285	1.29627	4.57106	2.27182	1.4175							forward	-3	-3	-3	-3	-3	-3
A_09_P018511	Euchromatic gene	0	2.82138	6.2682	5.64202	2.39368	17.1451							forward	-3	-3	-3	-3	-3	2.405
A_09_P018516	Euchromatic gene	365.445	489.464	228.4	403.208	308.225	76.8999							forward	1.36	1.315	0.24	0.715	0.305	-2.06
A_09_P018521	Euchromatic gene	8.80378	2.53996	6.31321	12.5321	5.80313	196.942							forward	-3.305	-4.53	-3.75	-3.31	-4.4	1.055
A_09_P018526	Euchromatic gene	6.88724	186.117	155.922	192.185	628.966	7.62148							forward	-3.175	1.22	1.355	1.155	2.81	-3.985
A_09_P018531	Euchromatic gene	3095.56	5157.21	6052.95	4315.81	2303.5	17196.4							forward	-0.315	0.08	0.125	-0.315	-1.065	1.535
A_09_P018536	Euchromatic gene	1561.22	2929.4	3029.13	2840.26	1410.38	961.354							forward	0.445	1.165	1.395	1.175	0.22	-0.395
A_09_P018541	Euchromatic gene	500.03	1199.28	831.826	825.838	689.967	304.82							forward	0.405	1.205	0.935	0.775	0.48	-0.84
A_09_P018546	Euchromatic gene	509.594	844.261	1305.56	2444.29	3142.15	1307.28							forward	-0.87	-0.355	0.36	0.91	1.285	0.035
A_09_P018551	Euchromatic gene	1072.54	167.992	19.2553	66.0748	80.0704	19.4989							forward	2.04	-0.77	-3.55	-2.26	-2.025	-4.96
A_09_P018556	Euchromatic gene	0.778827	6.46311	2.17527	2.35257	1.0021	2.05615							forward	-3	-3	-3	-3	-3	-3
A_09_P018561	Euchromatic gene	0.944838	1.04888	2.93477	5.05072	3.33229	1028.84							forward	-5.86	-6.68	-7.11	-6.275	-7.02	2.39
A_09_P018571	Euchromatic gene	45.2698	59.2737	53.8454	71.1603	69.1487	17.1266							forward	1	0.475	0.975	0.91	0.63	-1.115
A_09_P018576	Euchromatic gene	7.6898	30.5292	70.375	36.9966	39.0152	4.31365							forward	-0.99	0.885	2.235	1.01	0.97	-1.83
A_09_P018581	Euchromatic gene	2.5461	0.438042	5.70583	1.82705	3.32907	3.41405							forward	-3	-3	-3	-3	-3	-3
A_09_P018586	Euchromatic gene	0	8.21072	2.99765	7.55142	7.98757	2.55033							forward	-3	-3	-3	-3	-3	-3
A_09_P018591	Euchromatic gene	13.0995	52.984	98.9145	88.5389	83.523	1093.43							forward	-3.505	-2.035	-1.015	-1.795	-2.095	1.915
A_09_P018596	Euchromatic gene	2565.71	9399.51	11688.1	5901.29	4804.2	120.065							forward	-0.25	1.42	1.535	0.34	0.195	-5.14
A_09_P018601	Euchromatic gene	6937.45	37026.4	12821.3	1971.42	775.331	290.493							forward	0.17	2.53	0.525	-2.15	-3.385	-4.875
A_09_P018606	Euchromatic gene	2618.91	3705.78	4336.19	5377.74	5991.39	10056.8							forward	-0.81	-0.775	-0.425	-0.105	0.04	0.69
A_09_P018611	Euchromatic gene	3476.11	4942.42	5970.62	7718.12	7755.47	3310.48							forward	-0.345	-0.355	0.015	0.365	0.44	-0.775
A_09_P018616	Euchromatic gene	0.582523	4.39159	5.12551	1.64994	2.15686	84.9867							forward	-3	-3	-3	-3	-3	4.91
A_09_P018621	Euchromatic gene	0.149013	4.90554	1.55433	0	2.41225	0							forward	-3	-3	-3	-3	-3	-3
A_09_P018626	Euchromatic gene	0	0	0.913589	0	0.369327	2.32451							forward	-3	-3	-3	-3	-3	-3
A_09_P018631	Euchromatic gene	3.5703	1.61915	0	2.40082	0.865229	1.83898							forward	-3	-3	-3	-3	-3	-3
A_09_P018636	Euchromatic gene	17.9386	0	1.93974	0.387452	2.87776	0							forward	1.045	-3	-3	-3	-3	-3
A_09_P018641	Euchromatic gene	2.07018	3.75977	4.32241	1.89836	3.63707	0							forward	-3	-3	-3	-3	-3	-3
A_09_P018646	Euchromatic gene	1.18247	1.23492	0.986041	7.38168	2.33994	9.46496							forward	-3	-3	-3	-3	-1.465	-3
A_09_P018651	Euchromatic gene	2820.75	544.877	55.2524	43.9795	33.2663	1834.03							forward	1.455	-0.72	-3.995	-4.475	-4.95	0.685
A_09_P018656	Euchromatic gene	1979.22	4599.99	1236.97	573.954	811.629	1613.12							forward	-0.085	0.635	-0.815	-1.805	-1.45	-0.53
A_09_P018661	Euchromatic gene	89.0045	156.202	534.134	1145.22	1236.46	32.454							forward	-0.725	-0.785	1.175	1.82	1.93	-3.685
A_09_P018666	Euchromatic gene	1354.12	5055.72	6168.42	4575.54	2883.61	751.768							forward	0.18	0.565	0.85	0.585	0.09	-1.305
A_09_P018671	Euchromatic gene	11387.5	28655.4	76394.5	92975.5	109523	51880.6							forward	-1.425	-0.26	1.04	1.545	2.01	-1.105
A_09_P018676	Euchromatic gene	516.872	731.311	1233.75	1075.79	825.096	890.101							forward	-0.005	0.225	1.04	0.775	0.44	0.145
A_09_P018681	Euchromatic gene	730.056	1958.19	1168.1	726.25	782.535	182.394							forward	0.345	1.425	0.97	0.245	0.14	-2.05
A_09_P018686	Euchromatic gene	309.988	137.964	42.3552	41.8212	48.6557	61.7513							forward	2.18	0.415	-1.32	-1.69	-1.565	-1.57
A_09_P018691	Euchromatic gene	1543.84	3360.23	3901.6	2787.59	1845.5	493.511							forward	-0.04	0.795	1.295	0.66	0.19	-1.735
A_09_P018696	Euchromatic gene	5914.07	7184.75	9357.36	9483.85	8100.4	5397.36							forward	-0.02	-0.205	-0.045	0.03	-0.21	-0.905
A_09_P018701	Euchromatic gene	2.27709	2.53169	6.97878	4.33291	10.5129	6.36333							forward	-3	-3	-3	-3	-3	-3
A_09_P018706	Euchromatic gene	2.42081	40.2664	17.4684	9.95053	9.09957	921.874							forward	-5.52	-2.09	-3.07	-5.29	-5.505	2.625
A_09_P018711	Euchromatic gene	1.72513	0.947859	1.65728	2.61249	1.87121	1.23539							forward	-3	-3	-3	-3	-3	-3
A_09_P018716	Euchromatic gene	4.14594	30.98	59.536	77.1705	20.8871	26.5477							forward	-3.225	-0.285	0.875	0.715	-1.33	-0.6
A_09_P018721	Euchromatic gene	1932.18	302.048	34.8132	33.4246	21.009	432.927							forward	0.97	-1.68	-4.535	-4.665	-5.735	-1.43
A_09_P018726	Euchromatic gene	2.2886	3.18783	0.027576	2.21336	3.69082	15.0631							forward	-1.6	-1.91	-2.28	-3	-3	0.505
A_09_P018731	Euchromatic gene	9.21255	4.65389	9.77066	12.847	13.6221	122.03							forward	-1.68	-2.695	-1.83	-2.555	-1.865	1.625
A_09_P018736	Euchromatic gene	32.5794	48.6404	35.0364	39.8425	35.4542	44.9199							forward	-3.445	-3.54	-3.87	-4.03	-4.26	-4.41
A_09_P018741	Euchromatic gene	4.47847	5.43331	0.556357	2.90145	3.47733	67.2592							forward	-3.32	-3.58	-4.515	-3.925	-4.265	0.84
A_09_P018746	Euchromatic gene	5.09527	6.62036	2.88134	6.31939	3.25154	2.14426							forward	-3	-3	-3	-3	-3	-3
A_09_P018751	Euchromatic gene	0	4.84459	1.26134	1.95519	3.07171	5.42994							forward	-3	-3	-3	-3	-3	-3
A_09_P018756	Euchromatic gene	12.5717	3.44956	9.03252	12.8731	4.1849	15.003							forward	-3	-3	-3	-3	-3	-3
A_09_P018761	Euchromatic gene	0	2.7474	0	4.60114	3.56679	4.12774							forward	-3	-3	-3	-3	-3	-3
A_09_P018766	Euchromatic gene	8.06557	2.65804	1.28047	4.03135	4.44166	3.87963							forward	-3	-3	-3	-3	-3	-3
A_09_P018771	Euchromatic gene	1102.77	1968.91	293.677	321.444	562.972	1449.75							forward	-0.08	0.485	-1.61	-1.655	-0.965	0.15
A_09_P018776	Euchromatic gene	1.28124	2.78791	3.64093	0	2.04352	1.91581							forward	-3	-3	-3	-3	-3	-3
A_09_P018781	Euchromatic gene	3962.98	1371.71	1839.79	1669.5	1375.34	1480.62							forward	0.835	-0.83	-0.24	-0.35	-0.62	-0.805
A_09_P018786	Euchromatic gene	906.18	1548.56	1449.08	1380.77	1042.33	227.463							forward	0.52	1.035	1.255	1.015	0.635	-1.855
A_09_P018791	Euchromatic gene	134.891	9.89673	3.03557	0.635247	4.9604	2.80115							forward	3.815	-0.595	-2.81	-2.02	-3	-3.545
A_09_P018796	Euchromatic gene	1087.03	804.462	897.385	962.127	1127.6	123.685							forward	0.765	0.235	0.575	0.57	0.71	-2.785
A_09_P018801	Euchromatic gene	1515.67	2085.46	3401.28	3934.34	3427.28	1672.56							forward	0.05	0.335	0.985	1.19	1	-0.145
A_09_P018806	Euchromatic gene	63.5853	497.42	1727.73	2409.08	1867.66	899.936							forward	-3.065	-0.815	0.73	1.075	0.735	-0.455
A_09_P018811	Euchromatic gene	13.9378	21.316	82.81	235.401	235.834	294.088							forward	-4.495	-4.505	-2.405	-0.98	-1.06	-0.945
A_09_P018816	Euchromatic gene	83.2605	136.088	140.776	261.344	224.581	22.7435							forward	0.625	0.475	0.775	1.48	1.035	-2.595
A_09_P018821	Euchromatic gene	1005.05	1527.06	589.472	551.298	493.158	160.039							forward	1.045	1.435	0.27	0.135	-0.035	-2.495
A_09_P018826	Euchromatic gene	3048.46	5296.12	4292.97	4431.43	5128.71	1230.97							forward	-0.32	0.115	-0.125	0.195	-0.005	-1.85
A_09_P018831	Euchromatic gene	4699.23	7455.64	10098.1	11490.7	11336.6	2528.44							forward	-0.195	0.165	0.37	0.43	0.435	-1.555
A_09_P018836	Euchromatic gene	185.477	504.262	819.352	967.369	534.579	44.662							forward	1.325	1.85	2.93	2.855	1.8	-2.285
A_09_P018841	Euchromatic gene	3543.04	4895.63	4059.84	2886.87	2209.58	1485.62							forward	0.705	0.72	0.71	0.09	-0.195	-0.885
A_09_P018846	Euchromatic gene	23.5854	11.711	17.6395	34.3309	39.1932	11.2591							forward	1	-0.08	0.295	0.75	0.865	-0.7
A_09_P018851	Euchromatic gene	4020.66	1536.88	1213.4	2010.36	2565.89	5365.78							forward	0	-1.4	-1.595	-1.185	-0.77	0.08
A_09_P018856	Euchromatic gene	2343.1	3196.69	225.172	106.379	131.461	696.328							forward	1.125	1.33	-1.915	-3.14	-2.82	-0.685
A_09_P018861	Euchromatic gene	682.441	195.654	353.634	376.685	388.739	115.943							forward	1.37	-0.71	0.295	0.16	0.16	-1.99
A_09_P018866	Euchromatic gene	2065.89	794.579	703.698	1556.95	1767.25	1646.07							forward	0.205	-1.115	-1.04	-0.32	-0.16	-0.155
A_09_P018871	Euchromatic gene	45.6151	57.9452	186.692	206.606	193.808	50.9272							forward	0.675	0.215	2.235	1.76	1.8	-0.115
A_09_P018876	Euchromatic gene	0	4.13639	0.899585	2.14793	2.17407	0							forward	-3	-3	-3	-3	-3	-3
A_09_P018881	Euchromatic gene	3420.24	6245.56	6588.13	6159.79	5394.13	11940.8							forward	-0.615	-0.135	-0.105	-0.315	-0.49	0.61
A_09_P018891	Euchromatic gene	2.38983	6.48402	6.99202	7.84544	10.6225	16.6982							forward	-3	-3	-3	-3	-3	2.56
A_09_P018896	Euchromatic gene	3.34716	7.18106	2.24317	2.46094	2.16937	2.38637							forward	-3	-3	-3	-3	-3	-3
A_09_P018901	Euchromatic gene	4.53033	6.76619	6.63289	30.8846	112.102	1671.4							forward	-3.955	-5.91	-5.29	-2.095	-0.17	3.765
A_09_P018906	Euchromatic gene	5.1805	3.14242	4.58871	15.7472	19.2528	5.11753							forward	-2.34	-2.715	-2.42	-1.105	-0.325	-2.385
A_09_P018911	Euchromatic gene	522.568	425.94	164.743	867.388	1319.76	862.59							forward	-0.22	-0.66	-1.735	0.325	0.89	0.27
A_09_P018916	Euchromatic gene	7.95693	0.304261	4.91327	8.15959	6.12294	464.912							forward	-1.85	-3.355	-3.02	-2.55	-2.995	3.89
A_09_P018921	Euchromatic gene	10.5573	6.44862	9.21045	6.31688	12.4692	116.165							forward	-2.115	-3.52	-3.005	-3.37	-2.815	0.94
A_09_P018926	Euchromatic gene	766.398	1141.86	950.852	946.823	678.51	22.6314							forward	0.73	1.21	1.15	0.795	0.21	-5.17
A_09_P018931	Euchromatic gene	36.624	39.4972	31.3321	36.593	30.6816	567.744							forward	-0.425	-1.105	-1.095	-1.645	-1.615	2.525
A_09_P018936	Euchromatic gene	5.22149	3.36561	5.56626	19.3064	49.8311	1128.69							forward	-4.435	-5.58	-5.505	-3.805	-1.97	2.825
A_09_P018941	Euchromatic gene	6.72449	8.17421	2.79131	10.0356	10.76	176.627							forward	-1.975	-2.355	-2.94	-1.95	-0.675	3.405
A_09_P018946	Euchromatic gene	46.1414	28.4128	28.521	9.78675	11.0803	4.23703							forward	2.48	2.315	2.46	-3	-1.21	-1.68
A_09_P018951	Euchromatic gene	13.2142	200.11	480.397	243.565	166.751	183.194							forward	-2.675	1.38	2.8	1.525	0.615	0.86
A_09_P018956	Euchromatic gene	2887.25	6034.92	6106.87	4658.93	3091.71	253.849							forward	0.04	0.725	0.915	0.47	-0.07	-3.63
A_09_P018961	Euchromatic gene	0.518132	4.95794	9.48958	14.5048	14.1157	906.629							forward	-7.26	-7.645	-7.225	-6.02	-6.44	0.245
A_09_P018966	Euchromatic gene	2.7433	0.285854	4.86925	10.6968	13.066	1.6137							forward	-3	-3	-3	-3	-3	-3
A_09_P018971	Euchromatic gene	1.10073	1.18557	1.57902	4.69719	3.65776	946.56							forward	-3.98	-4.915	-5.18	-4.115	-4.435	4.315
A_09_P018976	Euchromatic gene	1288.02	157.814	18.5353	32.9771	36.7251	237.394							forward	1.39	-1.595	-4.97	-3.995	-3.955	-1.43
A_09_P018981	Euchromatic gene	480.596	59.7051	61.9296	69.6927	63.5754	13.7705							forward	2.76	-1.095	-0.585	-0.955	-1.145	-3.445
A_09_P018986	Euchromatic gene	1567.95	488.663	1269.16	1084.45	1132.28	294.765							forward	0.765	-0.87	0.565	0.085	0.1	-1.89
A_09_P018991	Euchromatic gene	1060.25	619.025	336.194	641.219	800.036	608.34							forward	0.335	-0.445	-1.005	-0.615	-0.305	-0.535
A_09_P018996	Euchromatic gene	8.75735	45.5275	52.1208	176.24	403.183	1196.33							forward	-4.87	-3.435	-3.115	-1.635	-0.395	1.025
A_09_P019001	Euchromatic gene	2001.39	4474.63	3221.91	2849.23	2883.08	206.419							forward	0.175	1.03	0.945	0.805	0.845	-3.335
A_09_P019006	Euchromatic gene	21.6	7.37825	9.34273	15.6746	8.99259	37.3092							forward	0.04	-1.89	-1.705	-1.985	-2.8	0.065
A_09_P019011	Euchromatic gene	5371.94	4702.18	1768.3	2902.07	3837.85	5113.29							forward	0.045	-0.62	-1.86	-1.315	-1.015	-0.535
A_09_P019016	Euchromatic gene	3.5114	5.01866	4.9583	21.935	27.7412	0.00985632							forward	-3	-3	-3	3.505	3.11	-3
A_09_P019021	Euchromatic gene	1.61833	3.41152	4.64198	2.43164	3.8668	1.47654							forward	-3	-3	-3	-3	-3	-3
A_09_P019026	Euchromatic gene	31.6233	53.5822	243.436	300.437	266.169	35.1806							forward	0.37	0.565	3.32	3.365	2.95	-0.265
A_09_P019031	Euchromatic gene	175.725	38.0044	107.243	155.084	153.364	13.1716							forward	2.79	-0.2	1.47	2.02	2.19	-2.31
A_09_P019036	Euchromatic gene	1380.1	341.034	1429.93	3266.81	4013.05	32.0447							forward	0.67	-1.245	0.9	1.76	1.985	-5.36
A_09_P019041	Euchromatic gene	1.16763	4.69743	3.69067	0.0856601	0	2.65153							forward	-3	-3	-3	-3	-3	-3
A_09_P019051	Euchromatic gene	2.10341	4.3384	4.06734	4.14169	6.68751	205.379							forward	-3	-3	-3	-3	-0.775	4.52
A_09_P019056	Euchromatic gene	3.2043	0.956933	0	1.70173	5.62353	12.8995							forward	-3	-3	-3	-3	-3	-3
A_09_P019061	Euchromatic gene	0.997936	3.3171	1.45714	9.22274	4.67455	5329.55							forward	-5.27	-6.145	-6.45	-5.805	-6.59	5.38
A_09_P019066	Euchromatic gene	22.2087	31.0482	32.3789	33.4901	34.432	29311							forward	-3.8	-3.905	-4.2	-3.88	-4.16	4.78
A_09_P019071	Euchromatic gene	5.33074	10.2232	6.34215	8.31298	7.48638	5414.35							forward	-4.51	-5.115	-5.075	-5.72	-5.605	5.045
A_09_P019076	Euchromatic gene	2.92319	5.85757	7.46375	3.32564	6.55449	2457.28							forward	-5.72	-6.035	-5.615	-6.655	-6.97	3.46
A_09_P019081	Euchromatic gene	7.70324	1.84316	4.44638	5.01124	5.4958	368.374							forward	-2.01	-3.28	-3.65	-3.52	-3.635	3.66
A_09_P019086	Euchromatic gene	2080.18	3277.39	2930.74	3778.87	4063.69	991.512							forward	-0.01	0.395	0.46	0.645	0.745	-1.13
A_09_P019096	Euchromatic gene	5.23021	8.8266	6.8331	6.80162	7.26437	34.4241							forward	-2.87	-3.63	-3.19	-4.42	-3.79	-1.28
A_09_P019101	Euchromatic gene	1245.16	1917.16	691.729	636.887	732.821	236.649							forward	0.795	1.205	0.135	-0.045	0.13	-1.88
A_09_P019106	Euchromatic gene	206.112	531.69	855.648	1946.31	2024.02	16.834							forward	-0.595	0.01	0.875	1.815	1.8	-5.96
A_09_P019111	Euchromatic gene	608.037	145.167	71.6782	117.092	288.025	196.488							forward	1.48	-1.04	-1.84	-1.26	-0.1	-1.05
A_09_P019116	Euchromatic gene	15.0386	10.3881	7.87511	13.7264	9.56962	108.852							forward	-0.25	-0.33	-0.755	-1.62	-2.07	2.51
A_09_P019121	Euchromatic gene	29.4547	41.2548	29.9609	30.2761	29.6481	3000.55							forward	-0.465	-1.255	-0.99	-1.3	-1.62	3.87
A_09_P019126	Euchromatic gene	6.20827	3.77903	6.28342	7.25783	9.10344	73.9712							forward	-3	-3	-3	-3	-3	2.71
A_09_P019131	Euchromatic gene	0	6.36776	2.17048	4.45819	2.53764	1.81425							forward	-3	-3	-3	-3	-3	-3
A_09_P019136	Euchromatic gene	1609.05	1376.56	158.471	124.697	118.879	5897.89							forward	-0.21	-0.585	-3.32	-3.73	-3.985	1.355
A_09_P019141	Euchromatic gene	6741.67	1883.53	4430.1	8698.94	11704.6	5383.16							forward	0.13	-2.5	-0.975	-0.18	0.295	-0.96
A_09_P019146	Euchromatic gene	0	1.25271	4.49695	0	0	1.99137							forward	-3	-3	-3	-3	-3	-3
A_09_P019151	Euchromatic gene	16.7952	257.564	150.031	84.924	25.186	3.51386							forward	-1.425	3.435	2.88	1.465	-0.26	-3.91
A_09_P019156	Euchromatic gene	1.47073	7.59392	5.29089	9.76018	11.4769	1.07287							forward	-1.475	-3	-3	-0.815	-3	-3
A_09_P019161	Euchromatic gene	505.538	1119.89	835.685	656.114	501.03	94.4991							forward	1.19	1.87	1.505	0.855	0.545	-2.305
A_09_P019166	Euchromatic gene	1533.76	2059.02	1115.64	1634.44	2050.49	612.499							forward	0.32	0.48	0.06	0.325	0.49	-1.2
A_09_P019171	Euchromatic gene	1919.74	2690.38	2206.02	2631.09	2240.68	178.707							forward	0.515	0.775	0.75	0.79	0.585	-3.06
A_09_P019176	Euchromatic gene	1510.53	104.742	338.647	946.841	1248.12	642.25							forward	0.835	-2.62	-0.915	0.165	0.5	-0.56
A_09_P019181	Euchromatic gene	2618.4	3845.97	5018.92	6228.07	6426.13	1212.38							forward	-0.115	0.14	0.52	0.78	0.8	-1.435
A_09_P019186	Euchromatic gene	47.8597	22.0639	18.99	22.3346	26.1912	25.0236							forward	1.475	0.12	-0.105	0.18	0.145	-0.035
A_09_P019191	Euchromatic gene	870.9	1832.42	3050.77	3829	3491.87	1044.31							forward	-0.675	0.245	0.885	1.14	1	-0.66
A_09_P019196	Euchromatic gene	1507.04	514.083	599.793	1135.09	1409.35	1300.31							forward	0.935	-0.59	-0.135	0.38	0.54	0.56
A_09_P019201	Euchromatic gene	728.431	1242.7	784.416	989.342	1063.45	355.119							forward	0.035	0.47	0.065	0.245	0.285	-1.36
A_09_P019206	Euchromatic gene	713.504	1905.07	3780.82	4641.85	3787.62	304.507							forward	-0.34	0.72	1.85	1.985	1.715	-1.995
A_09_P019211	Euchromatic gene	2018.07	634.86	1440.71	1611.74	1458.16	165.38							forward	1.04	-0.515	0.555	0.59	0.38	-3.125
A_09_P019216	Euchromatic gene	779.736	1517.97	1331.89	1238.02	881.882	234.693							forward	0.68	1.135	1.095	0.97	0.515	-1.87
A_09_P019221	Euchromatic gene	526.578	717.728	201.314	166.203	118.258	25.8269							forward	2.25	2.255	0.525	-0.155	-0.765	-3.495
A_09_P019226	Euchromatic gene	493.773	182.147	594.72	658.82	423.497	233.621							forward	1.02	-0.57	1.25	1.01	0.36	-0.555
A_09_P019231	Euchromatic gene	5.47898	9.77254	33.8429	135.359	174.619	64.0918							forward	-3.065	-2.44	-0.155	1.8	1.95	0.295
A_09_P019236	Euchromatic gene	10.2421	2.74812	3.16932	5.61235	24.3123	0.627271							forward	-3	-3	-3	-3	1.47	-3
A_09_P019241	Euchromatic gene	1.70889	0	1.32987	5.66228	3.08022	2.39052							forward	-3	-3	-3	-3	-3	-3
A_09_P019246	Euchromatic gene	1.13468	5.21728	2.26722	1.87006	1.12023	0.715894							forward	-3	-3	-3	-3	-3	-3
A_09_P019251	Euchromatic gene	162.934	34996.3	3929.21	177.323	132.797	165.182							forward	-4.135	3.075	0.16	-3.845	-4.245	-4.46
A_09_P019256	Euchromatic gene	0	2.6376	1.17645	3.58272	2.88218	10.24							forward	-3	-3	-3	-3	-3	-3
A_09_P019261	Euchromatic gene	22.5219	67.6584	109.567	194.373	187.194	2.3195							forward	-0.115	1.515	2.3	2.585	2.27	-4.155
A_09_P019266	Euchromatic gene	1.70187	1.68928	1.89368	3.43415	4.34489	3.67997							forward	-3	-3	-3	-3	-3	-3
A_09_P019271	Euchromatic gene	7.21804	29.7091	32.4184	35.86	54.214	42.5275							forward	-0.95	0.645	0.98	0.87	1.125	1.53
A_09_P019276	Euchromatic gene	128.021	380.684	1569.7	1813.01	1035.02	142.037							forward	-0.62	0.18	2.24	2.125	1.375	-1.86
A_09_P019281	Euchromatic gene	78.0484	96.3057	75.3001	86.7945	78.778	26766.6							forward	-6.445	-6.085	-6.31	-6.31	-6.525	1.315
A_09_P019286	Euchromatic gene	51.1384	95.7384	103.689	142.066	103.209	1377.8							forward	-4.35	-3.9	-3.555	-3.465	-3.915	-0.38
A_09_P019291	Euchromatic gene	523.919	786.187	442.648	747.606	721.731	94.6044							forward	0.49	0.745	0.275	0.64	0.67	-2.715
A_09_P019296	Euchromatic gene	6.77655	1514.55	6542.4	6469.74	3166.48	71.1391							forward	-7.38	0.63	2.495	2.615	1.685	-4.365
A_09_P019301	Euchromatic gene	2875.45	4235.53	3556.7	4172.02	3435.31	3082.59							forward	0.26	0.295	0.31	0.395	0.015	0.095
A_09_P019311	Euchromatic gene	4077.82	2603.06	4268.35	6984.7	8204.96	3771.62							forward	-0.02	-1.205	-0.345	0.24	0.405	-0.685
A_09_P019316	Euchromatic gene	89.2317	814.008	2033.07	1281.05	519.971	641.527							forward	-1.095	1.11	2.61	1.695	0.38	0.6
A_09_P019321	Euchromatic gene	193.859	90.5721	169.425	181.059	209.16	3482.47							forward	-2.29	-3.525	-2.62	-2.675	-2.525	1.165
A_09_P019326	Euchromatic gene	1675.69	3260.89	3200.2	2056.19	2085.28	878.713							forward	-0.155	0.5	0.32	-0.205	-0.255	-1.55
A_09_P019331	Euchromatic gene	1566.87	267.554	1201.2	2101.91	1716.21	1550.84							forward	0.42	-1.74	0.07	0.555	0.265	0.15
A_09_P019336	Euchromatic gene	2371.66	5307.6	2521.87	1749.41	1803.91	949.78							forward	0.445	1.12	0.59	-0.13	-0.14	-0.995
A_09_P019341	Euchromatic gene	1918.21	3530.41	1087.18	779.127	1080.84	1305.23							forward	0.55	1.15	-0.265	-0.79	-0.33	-0.28
A_09_P019346	Euchromatic gene	2.80078	349.181	198.382	185.825	89.5566	8.07572							forward	-3.405	3.13	2.36	2.025	0.66	-2.88
A_09_P019351	Euchromatic gene	547.448	766.46	3171.83	4568.71	3689.94	1940.09							forward	-0.595	-0.13	1.45	2.28	1.865	0.715
A_09_P019356	Euchromatic gene	9.35362	12.3533	26.3912	53.8365	55.8023	1035.94							forward	-6.44	-6.34	-5.025	-4.2	-4.16	-0.3
A_09_P019361	Euchromatic gene	8.8085	7.97112	4.77857	0	7.16848	379.414							forward	-2.35	-3.24	-3.825	-4.505	-4.5	2.805
A_09_P019366	Euchromatic gene	1.80103	2.54919	3.4095	6.9382	3.52621	55.2993							forward	-2.035	-2.77	-2.99	-2.46	-2.495	1.845
A_09_P019371	Euchromatic gene	4224.88	6194.9	3242.94	2968.55	3735.53	7773.1							forward	0.175	0.185	-0.505	-0.62	-0.28	0.535
A_09_P019376	Euchromatic gene	376.995	136.1	375.329	475.003	378.421	256.95							forward	1.12	-1.13	0.635	0.575	0.265	-0.48
A_09_P019381	Euchromatic gene	21.0328	25.8859	19.1927	37.1243	26.3407	66754.5							forward	-3.62	-4	-4.395	-3.685	-4.34	5.505
A_09_P019386	Euchromatic gene	12.5799	14.737	11.6141	9.65614	15.3539	36122.1							forward	-2.23	-3.005	-3.08	-3.49	-3.15	5.13
A_09_P019391	Euchromatic gene	2669.18	2114.54	1714.49	4441.43	4306.24	181.383							forward	0.61	0.1	-0.01	1.095	1.035	-3.47
A_09_P019396	Euchromatic gene	5792.84	1055.77	1472.13	2728.12	2822.11	2136.83							forward	0.995	-1.73	-0.975	-0.31	-0.345	-0.74
A_09_P019401	Euchromatic gene	1314.77	258.605	338.098	1133.69	1834.41	2414.79							forward	0.86	-1.38	-0.825	0.3	0.88	1.325
A_09_P019406	Euchromatic gene	2014.13	1166.76	512.936	621.139	710.253	916.039							forward	0.58	-0.23	-1.205	-1.135	-0.98	-0.86
A_09_P019411	Euchromatic gene	3871.78	5456.69	4560.69	3590.69	2670.15	8604.41							forward	-0.275	-0.06	-0.385	-0.855	-1.2	0.38
A_09_P019416	Euchromatic gene	1630.96	1530.38	1717.06	3089.87	3407.17	577.233							forward	0.195	-0.04	0.17	0.945	1.1	-1.765
A_09_P019421	Euchromatic gene	1921.33	212.733	715.117	1779.27	2494.14	2543.89							forward	0.09	-2.705	-1.175	-0.165	0.165	0.19
A_09_P019426	Euchromatic gene	2772.6	4866.65	5134.96	3698.26	1731.41	1858.87							forward	0.12	0.665	0.725	0.33	-0.64	-0.585
A_09_P019431	Euchromatic gene	1652.04	746.262	1426.62	2659.94	2689.2	644.701							forward	0.225	-0.93	0.14	0.75	0.765	-1.27
A_09_P019436	Euchromatic gene	4055.98	8252.51	9257.58	8724.52	8242.1	2972.17							forward	-0.285	0.215	0.49	0.415	0.295	-1.245
A_09_P019441	Euchromatic gene	2860.92	5738.67	7047.02	7224.64	5753.68	1493.05							forward	-0.3	0.34	0.685	0.71	0.44	-1.49
A_09_P019446	Euchromatic gene	2477.76	5245.58	6694.39	5484.5	5323.44	1297.05							forward	-0.4	0.25	0.685	0.545	0.445	-1.56
A_09_P019451	Euchromatic gene	2.10682	5.77686	6.56589	1.2861	20.1478	7.25781							forward	-1.945	-2.305	-1.395	-1.29	0.235	-1.41
A_09_P019456	Euchromatic gene	1550.96	196.346	723.397	1146.59	1198.98	350.826							forward	0.65	-1.98	-0.105	0.105	0.12	-1.505
A_09_P019461	Euchromatic gene	9232.93	1316.22	1020.11	642.249	294.82	101.467							forward	1.895	-1.125	-1.44	-2.06	-3.14	-5.095
A_09_P019466	Euchromatic gene	217.405	416.652	295.59	239.682	125.897	38.5857							forward	1.765	2.17	1.87	1.37	0.49	-2.225
A_09_P019471	Euchromatic gene	10.2441	28.8025	147.469	228.021	284.682	169.321							forward	-4.115	-2.785	-0.34	-0.15	0.11	-0.625
A_09_P019476	Euchromatic gene	1382.15	1001.72	489.603	588.811	646.378	526.024							forward	0.455	-0.225	-0.71	-0.66	-0.61	-1.18
A_09_P019481	Euchromatic gene	275.789	429.47	356.186	336.667	286.855	64.2025							forward	1.46	1.365	1.495	0.915	0.56	-2.155
A_09_P019486	Euchromatic gene	2134.11	4036.92	5013.36	5383.7	4315.42	6767.77							forward	-0.775	-0.18	0.075	0.125	-0.105	0.45
A_09_P019491	Euchromatic gene	3.77448	1.57799	1.62777	0.797251	0	29.7834							forward	-1.83	-2.31	-2.855	-2.16	-2.33	1.435
A_09_P019496	Euchromatic gene	5.75903	10.0832	4.66637	7.57682	4.99532	1004.28							forward	-3.945	-2.9	-4.055	-4.36	-4.88	4.32
A_09_P019501	Euchromatic gene	9.87865	25.537	30.3739	27.2219	20.2973	6549.79							forward	-5.19	-4.325	-4.165	-4.55	-5.055	3.44
A_09_P019506	Euchromatic gene	8.8916	6.36622	3.61958	8.88453	4.02399	80.5582							forward	-2.955	-2.535	-3.68	-3.59	-4.5	0.855
A_09_P019511	Euchromatic gene	0.356355	2.04849	1.2573	3.82794	1.67889	2.63221							forward	-3	-3	-3	-3	-3	-3
A_09_P019516	Euchromatic gene	16.4015	19.5715	11.6766	19.8405	19.2636	5487.49							forward	-3.085	-3.665	-3.995	-3.785	-4.205	3.79
A_09_P019521	Euchromatic gene	5.98765	3.43718	4.07502	2.53889	4.73196	86.1124							forward	-3	-1.565	-3	-1.94	-2.305	3.285
A_09_P019526	Euchromatic gene	2.22315	5.06141	0	3.66864	2.37376	5.07073							forward	-3	-3	-3	-3	-3	-3
A_09_P019531	Euchromatic gene	4.77858	3.60187	8.24243	5.74637	5.6107	41.4043							forward	-2.59	-3.825	-3.31	-3.975	-4.26	0.015
A_09_P019536	Euchromatic gene	927.216	1601.14	888.954	674.928	804.336	456.543							forward	0.345	0.995	0.33	0.14	0.32	-0.85
A_09_P019541	Euchromatic gene	7.54933	32.4359	18.8011	26.109	15.1399	1228.77							forward	-4.05	-2.595	-3.2	-3.395	-4.2	2.5
A_09_P019546	Euchromatic gene	1622.65	2137.32	2134.15	2249.6	2275.61	1334.27							forward	-0.075	0.2	0.335	0.26	0.245	-0.41
A_09_P019551	Euchromatic gene	6.93408	9.38777	5.79018	0.360241	9.13627	7.54783							forward	-3	-3	-3	-3	-3	-3
A_09_P019556	Euchromatic gene	4.00868	20.7221	63.271	53.9016	23.9087	6.53849							forward	-3	1.89	3.565	2.62	0.86	-0.915
A_09_P019561	Euchromatic gene	38.8355	51.448	155.89	59.6376	42.4746	1262.49							forward	-4.495	-4.49	-3.05	-4.61	-5.295	-0.48
A_09_P019566	Euchromatic gene	515.055	623.455	89.5851	24.2321	12.7939	1971.66							forward	1.315	1.155	-1.415	-4.185	-5.46	2.35
A_09_P019571	Euchromatic gene	3.46155	18.0977	9.44275	14.9567	6.72685	13.9887							forward	-2.695	-1.755	-1.81	-1.825	-3.04	-1.51
A_09_P019576	Euchromatic gene	1350.5	1133.15	840.505	1143.02	870.941	1167.48							forward	0.255	-0.115	-0.14	0.01	-0.365	-0.015
A_09_P019581	Euchromatic gene	534.622	993.134	570.862	564.786	646.506	409.619							forward	0.87	1.505	1.025	0.2	-0.125	-0.4
A_09_P019586	Euchromatic gene	4651.48	8547.82	9904.13	9075.19	6675.94	2315.16							forward	0.21	0.6	0.74	0.47	0.19	-1.395
A_09_P019591	Euchromatic gene	2416.2	473.657	458.709	793.808	983.882	1899.05							forward	0.52	-1.7	-1.655	-1.08	-0.895	-0.005
A_09_P019596	Euchromatic gene	20.5379	18.8521	18.5194	10.5884	19.0378	3.62035							forward	1.86	1.485	1.1	0.16	0.19	-2.02
A_09_P019601	Euchromatic gene	6.47909	4.91805	7.02227	14.1396	2.37056	83.2576							forward	-2.94	-3.21	-2.27	-1.84	-3.615	1.83
A_09_P019606	Euchromatic gene	13.8331	133.194	591.252	1636.06	2299.7	930.367							forward	-5.145	-2.495	-0.425	0.86	1.22	-0.36
A_09_P019611	Euchromatic gene	77.0629	15534.8	2533.79	1098.81	133.065	14.9828							forward	-3.36	3.01	1.07	-0.22	-3.06	-7.02
A_09_P019616	Euchromatic gene	84.7938	4716.21	113.526	34.9238	28.3095	33.053							forward	-1.62	2.66	-1.815	-3.775	-4.285	-4.515
A_09_P019621	Euchromatic gene	0.822665	4.40129	2.20857	1.52978	3.79919	0.153872							forward	-3	-3	-3	-3	-3	-3
A_09_P019626	Euchromatic gene	0.328341	5.47964	4.39039	4.47745	1.29534	3.41998							forward	-3	-3	-3	-3	-3	-3
A_09_P019631	Euchromatic gene	5.84692	6.25264	2.98256	6.82221	4.78807	4.34578							forward	-3	-3	-3	-3	-3	-3
A_09_P019636	Euchromatic gene	1.76884	12.9358	1.87092	4.44254	2.68106	0							forward	-3	-3	-3	-3	-3	-3
A_09_P019641	Euchromatic gene	3.26153	43.7953	26.9903	16.7532	7.60084	12.6224							forward	-1.46	3.34	2.025	1.255	-3	0.57
A_09_P019646	Euchromatic gene	6.76742	6.85038	1.60138	3.6519	5.15204	7.48371							forward	-3	-3	-3	-3	-3	-0.1
A_09_P019651	Euchromatic gene	2.97002	1.72081	2.7922	2.46893	3.91018	1.88928							forward	-3	-3	-3	-3	-3	-3
A_09_P019656	Euchromatic gene	63.7225	29.1071	31.069	35.8063	33.0579	14.4182							forward	2.65	0.685	0.365	0.295	0.08	-0.84
A_09_P019666	Euchromatic gene	22.6996	14.3043	11.9709	6.56238	11.6542	8.28476							forward	1.86	0.035	0.38	-3	-3	-0.505
A_09_P019671	Euchromatic gene	1.98029	7.99491	4.09496	122.159	256.051	410.029							forward	-5.055	-5.03	-4.615	0.18	1.105	2.02
A_09_P019676	Euchromatic gene	0.490218	1.44541	1.55111	2.49167	2.46538	0.163082							forward	-3	-3	-3	-3	-3	-3
A_09_P019681	Euchromatic gene	3.20192	3.23022	3.21259	4.63703	5.98859	65.8973							forward	-5.2	-6.16	-6.465	-5.875	-6.345	-1.225
A_09_P019686	Euchromatic gene	1.05354	3.83215	0	6.40758	0.0773569	2.99629							forward	-3	-3	-3	-3	-3	-3
A_09_P019691	Euchromatic gene	201.093	478.91	218.554	100.189	169.052	90.0606							forward	1.14	1.49	0.695	-0.55	-0.005	-1.795
A_09_P019696	Euchromatic gene	22.7383	29.706	34.0838	47.7839	29.6653	15600.5							forward	-5.41	-5.69	-5.565	-5.005	-5.66	2.985
A_09_P019706	Euchromatic gene	564.419	516.322	103.274	113.425	114.549	161.338							forward	1.525	1.26	-0.9	-1.225	-1.245	-0.77
A_09_P019711	Euchromatic gene	1797.91	3628.47	1101.05	912.429	988.34	226.489							forward	0.765	1.555	0.155	-0.07	-0.075	-2.5
A_09_P019716	Euchromatic gene	1932.65	820.739	3308.31	3848.9	3694.43	714.574							forward	0.16	-1.125	0.52	0.775	0.725	-1.745
A_09_P019721	Euchromatic gene	27.3995	19.2634	15.783	17.7626	14.5415	33.2307							forward	0.585	-0.83	-0.65	-1.265	-1.155	0.425
A_09_P019726	Euchromatic gene	8.42396	363.89	1918.93	1387.9	1297.93	977.048							forward	-6.775	-1.09	1.155	0.585	0.41	0.01
A_09_P019731	Euchromatic gene	8.20461	4.91715	6.85146	7.57368	7.0951	8.18082							forward	-3	-3	-3	-3	-3	-3
A_09_P019736	Euchromatic gene	9.36968	5.73139	24.371	91.2383	34.4127	2.86683							forward	-1.625	-1.54	1.57	3.35	1.71	-2.35
A_09_P019741	Euchromatic gene	0	0	0	2.5506	0.873628	0.257168							forward	-3	-3	-3	-3	-3	-3
A_09_P019746	Euchromatic gene	12.1065	6.48331	8.48344	10.4767	8.13585	21.4433							forward	-0.93	-3.305	-2.53	-2.525	-3.06	-0.805
A_09_P019751	Euchromatic gene	1202.17	242.234	993.96	948.254	1076.55	715.156							forward	0.825	-1.365	0.645	0.475	0.61	-0.04
A_09_P019756	Euchromatic gene	0	0	1.12182	5.68165	0.894016	10.743							forward	-3	-3	-3	-3	-3	0.675
A_09_P019761	Euchromatic gene	11.7451	16.7328	108.563	556.536	1029.17	10.2648							forward	-3.97	-4.245	-0.945	0.95	1.69	-5.65
A_09_P019766	Euchromatic gene	6.26421	7.28784	6.76861	33.3705	36.5716	2.74184							forward	-1.825	-2.14	-1.65	1.02	1.105	-1.775
A_09_P019771	Euchromatic gene	2.19058	0.459251	0.162094	3.04896	1.15657	1.96018							forward	-3	-3	-3	-3	-3	-3
A_09_P019776	Euchromatic gene	4397.41	8623.38	7062.72	5601.52	6439.15	4016.45							forward	-0.27	0.24	-0.025	-0.455	-0.22	-0.955
A_09_P019781	Euchromatic gene	28.3144	19.4694	7.7989	23.4127	32.6005	5.04278							forward	0.83	-0.075	0.09	0.705	1.145	-1.77
A_09_P019786	Euchromatic gene	12.9949	21.406	9.37877	36.5236	26.7712	470.646							forward	-3.29	-3.405	-4.735	-2.96	-3.835	1.075
A_09_P019796	Euchromatic gene	2170.19	4429.79	5186.96	5793.13	4882.66	5132.88							forward	-0.41	0.235	0.605	0.725	0.505	0.54
A_09_P019801	Euchromatic gene	1.95361	6.74079	11.1266	14.0908	19.2549	43.4788							forward	-2.305	-2.265	-0.68	-1.13	-0.375	1.325
A_09_P019806	Euchromatic gene	464.853	695.963	569.403	396.901	228.099	99.3322							forward	1.835	1.73	1.845	1.005	0.19	-1.365
A_09_P019811	Euchromatic gene	4107.1	8013.42	10314.4	11617.8	9303.46	2910.72							forward	-0.2	0.3	0.725	0.86	0.59	-1.08
A_09_P019816	Euchromatic gene	2557.65	949.712	1739.16	2497.74	3733.45	482.617							forward	0.125	-1.305	-0.755	0.185	0.73	-2.655
A_09_P019821	Euchromatic gene	4.03679	2.65542	3.24955	1.68401	5.23868	479.458							forward	-2.98	-3.685	-4.465	-4.34	-4.6	3.525
A_09_P019826	Euchromatic gene	5282.22	3622.58	2229.56	3372.66	4453.38	13758.8							forward	-0.295	-1.485	-1.825	-1.505	-1.13	0.465
A_09_P019831	Euchromatic gene	93.3041	60.9419	27.8706	21.4235	24.1547	4.88235							forward	2.68	1.595	0.34	-0.6	-0.435	-2.39
A_09_P019836	Euchromatic gene	2521.19	4088.38	1833.6	2117.12	1954.82	1158.03							forward	0.375	0.82	-0.095	-0.08	-0.26	-1.045
A_09_P019841	Euchromatic gene	576.795	1001.87	936.94	1268.66	1086.94	431.229							forward	0.06	0.615	0.45	0.705	0.46	-0.87
A_09_P019846	Euchromatic gene	4.39053	9.16432	18.3513	16.1632	10.4875	8.53318							forward	-3	-0.185	1.625	1.135	-3	-0.485
A_09_P019851	Euchromatic gene	3068.01	4729.25	3479.6	3689.13	2954.21	3467.44							forward	-0.06	0.075	-0.04	-0.17	-0.565	-0.19
A_09_P019856	Euchromatic gene	189.728	317.455	360.611	361.32	303.146	391.781							forward	0.845	1.03	0.91	0.805	0.49	0.76
A_09_P019861	Euchromatic gene	11.2969	14.2109	7.48891	12.5536	4.86615	12.3571							forward	-1.79	-1.52	-1.69	-2.11	-3.345	-1.29
A_09_P019866	Euchromatic gene	1249.46	1435.18	93.2988	263.157	728.381	537.035							forward	0.04	-0.01	-3.34	-2.21	-0.83	-1.535
A_09_P019871	Euchromatic gene	3778.87	7242.97	9795.03	12546.7	12131.4	5992.04							forward	-0.7	-0.245	0.225	0.405	0.385	-0.635
A_09_P019876	Euchromatic gene	1872.88	2450.75	2527.83	3359.48	3043.28	597.108							forward	0.035	0.215	0.415	0.445	0.34	-1.675
A_09_P019881	Euchromatic gene	6.12504	19.6719	28.7581	46.0075	31.9085	90.3033							forward	-4.815	-3.55	-2.735	-2.585	-3.14	-1.505
A_09_P019886	Euchromatic gene	0	11.0721	44.7072	150.136	88.9553	0.400912							forward	-2.945	-2.25	1.065	2.485	1.645	-4.57
A_09_P019891	Euchromatic gene	0.580934	1.92991	0	3.12116	2.12349	0							forward	-3	-3	-3	-3	-3	-3
A_09_P019896	Euchromatic gene	1.17544	0	0.0905164	4.76007	0	0							forward	-3	-3	-3	-3	-3	-3
A_09_P019901	Euchromatic gene	1.26499	3.73618	4.52596	5.32289	2.41619	182.467							forward	-2.18	-2.885	-2.485	-2.485	-2.855	2.78
A_09_P019906	Euchromatic gene	5.08348	7.70442	3.39733	8.11898	5.80324	1.89981							forward	-4.445	-3.965	-4.035	-4.21	-4.205	-5.47
A_09_P019911	Euchromatic gene	8.67719	2.91863	1.74444	2.89668	5.45104	1.61796							forward	-3	-3	-3	-3	-3	-3
A_09_P019916	Euchromatic gene	1308.36	2637.89	249.129	211.207	542.819	343.203							forward	0.38	1.135	-1.66	-2.145	-0.82	-1.72
A_09_P019921	Euchromatic gene	0.813266	2.08892	2.97859	6.21257	4.23781	66.7069							forward	-3	-3	-3	-3	-3	3.525
A_09_P019926	Euchromatic gene	10.6671	6.71393	5.4291	9.17029	9.4113	678.732							forward	-4.2	-5.2	-5.85	-5.905	-5.935	1.72
A_09_P019931	Euchromatic gene	1.78215	4.37287	0	0.85577	0.96914	3.55227							forward	-3	-3	-3	-3	-3	-3
A_09_P019936	Euchromatic gene	0	2.3801	1.6899	0.505127	1.27856	1.33276							forward	-3	-3	-3	-3	-3	-3
A_09_P019941	Euchromatic gene	2.48597	24.3382	7.85925	0	5.60318	53.0902							forward	-1.685	0.96	-1.39	-2.22	-2.13	2.01
A_09_P019946	Euchromatic gene	14.4253	425.585	219.002	41.5066	13.9816	331.215							forward	-2.265	2.205	1.435	-1.575	-3.6	1.585
A_09_P019951	Euchromatic gene	3.91509	2.07777	8.46095	8.41665	6.67281	6.22322							forward	-3	-3	-3	-3	-3	-3
A_09_P019956	Euchromatic gene	1.44862	9.51704	4.06675	1.91763	3.71243	31.3744							forward	-3	-3	-3	-3	-3	1.785
A_09_P019961	Euchromatic gene	0.357079	5.0571	4.63959	5.18461	3.34547	49.0342							forward	-3	-3	-3	-3	-3	3.1
A_09_P019966	Euchromatic gene	6.04165	5.7504	10.1335	12.5423	7.00903	373.953							forward	-4.38	-5.235	-4.68	-4.39	-5.91	1.05
A_09_P019971	Euchromatic gene	42.4607	10.5555	0.641253	0.964994	2.339	3.94061							forward	3.365	-3	-3	-3	-3	-3
A_09_P019976	Euchromatic gene	1814.15	862.127	291.121	363.762	483.747	327.992							forward	1.24	-0.09	-1.12	-0.815	-0.565	-1.695
A_09_P019986	Euchromatic gene	1038.47	596.775	1006.64	1936	2437.85	853.783							forward	0.12	-0.63	0.11	0.805	1.07	-0.46
A_09_P019991	Euchromatic gene	2626.31	1353.07	1034.27	950.118	1052.62	748.457							forward	1.005	0	-0.41	-0.45	-0.49	-1.4
A_09_P019996	Euchromatic gene	3.82971	30.8346	38.5358	89.8775	103.923	134.402							forward	-5.51	-2.635	-1.79	-0.945	-0.84	-0.25
A_09_P020001	Euchromatic gene	976.657	66.8685	121.318	295.312	393.641	585.285							forward	1.045	-2.805	-1.83	-0.795	-0.585	-0.045
A_09_P020006	Euchromatic gene	2474.23	1356.81	1236.59	1648.19	1853.63	1160.47							forward	0.47	-0.63	-0.49	-0.15	-0.205	-0.885
A_09_P020011	Euchromatic gene	2356.51	2003.66	237.972	559.129	1552.28	720.477							forward	0.895	0.46	-2.22	-1.15	0.02	-1.14
A_09_P020016	Euchromatic gene	24.7382	30.3318	19.9793	17.7848	13.9293	61.2925							forward	-0.495	-1.005	-1.125	-1.88	-2.24	0.56
A_09_P020026	Euchromatic gene	1940.04	130.383	122.051	140.172	148.895	4881.94							forward	0.795	-2.5	-2.81	-2.77	-2.785	1.8
A_09_P020031	Euchromatic gene	4.86324	2.9472	13.1093	10.0379	7.07893	7.58713							forward	-3	-3	-3	-3	-3	-3
A_09_P020041	Euchromatic gene	3142.32	5440.08	7242.16	7618.91	6947.54	13344.8							forward	-0.74	-0.3	-0.06	0.07	-0.085	0.81
A_09_P020046	Euchromatic gene	2.381	4.26772	5.22113	5.23436	4.01286	5.08512							forward	-3	-3	-3	-3	-3	-3
A_09_P020051	Euchromatic gene	2080.08	823.546	716.138	1412.03	2732.43	1760.02							forward	0.475	-0.685	-0.9	-0.165	0.62	0.03
A_09_P020056	Euchromatic gene	253.346	87.994	70.8886	62.3636	70.4501	13.2532							forward	2.59	0.2	0.35	-0.26	-0.25	-2.66
A_09_P020061	Euchromatic gene	5.58712	0.88625	3.77938	4.06642	3.38302	1062.78							forward	-4.53	-5.87	-6.2	-5.605	-6.215	3.29
A_09_P020066	Euchromatic gene	2118.36	5279.61	4967.58	4413.88	4750.24	1259.29							forward	-0.14	0.735	1.015	0.875	0.955	-1.075
A_09_P020071	Euchromatic gene	6.52543	0.573984	1.25679	5.98794	13.3035	36.2681							forward	-2.16	-2.775	-3.555	-2.695	-1.255	1.175
A_09_P020076	Euchromatic gene	2466.26	2672.76	1713.68	2676.63	3377.9	2773.62							forward	-0.32	-0.485	-1	-0.77	-0.47	-0.415
A_09_P020081	Euchromatic gene	6.02412	2.5237	1.54244	0.376639	0	3.22291							forward	-3	-3	-3	-3	-3	-3
A_09_P020086	Euchromatic gene	54.1354	100.543	236.484	940.906	2819.43	1602.33							forward	-3.685	-2.97	-2.01	-0.51	0.95	0.375
A_09_P020091	Euchromatic gene	2687.11	2440.75	604.306	970.617	1458.82	69.34							forward	1.035	0.665	-0.88	-0.48	0.06	-4.66
A_09_P020096	Euchromatic gene	23.9304	43.3576	242.028	1077.27	1106.99	9.46834							forward	-1.45	-1.27	1.81	3.5	3.48	-3.97
A_09_P020101	Euchromatic gene	9.35533	11.4956	22.2299	47.3415	72.7955	209.984							forward	-4.5	-4.69	-3.56	-2.76	-2.04	-0.3
A_09_P020106	Euchromatic gene	41.9896	53.2337	100.553	248.209	405.754	2815.49							forward	-4.48	-4.53	-3.615	-2.58	-1.89	0.695
A_09_P020111	Euchromatic gene	2044.49	3225.3	2347.69	2307.96	2242.6	2271.43							forward	0.095	0.43	0.24	0.245	0.195	-0.005
A_09_P020116	Euchromatic gene	3.54668	4.81719	4.84914	9.3889	7.41279	3.94801							forward	-3	-3	-3	-3	-3	-3
A_09_P020121	Euchromatic gene	0	5.49368	1.31202	0	2.60874	4.43848							forward	-3	-3	-3	-3	-3	-3
A_09_P020126	Euchromatic gene	2.20547	3.84106	2.69876	8.67962	4.34768	851.557							forward	-4.545	-5.275	-4.725	-4.765	-6.21	3.105
A_09_P020131	Euchromatic gene	2.50382	1.39608	1.51675	4.68012	4.77407	1.51178							forward	-3	-3	-3	-3	-3	-3
A_09_P020136	Euchromatic gene	16.5708	16.4281	12.487	21.1165	11.7857	48.896							forward	-1.615	-2.4	-2.595	-2.805	-3.13	-0.8
A_09_P020141	Euchromatic gene	3.82665	2.7165	2.38098	5.07103	1.09185	30.8757							forward	-3	-3	-3	-3	-3	1.805
A_09_P020146	Euchromatic gene	0	0.295902	1.57726	0	2.32727	1.50211							forward	-3	-3	-3	-3	-3	-3
A_09_P020151	Euchromatic gene	15.4194	16.0272	15.8256	16.2113	16.2365	276.698							forward	-1.62	-2.23	-2.27	-3.22	-3.08	1.615
A_09_P020156	Euchromatic gene	4.30373	5.71896	5.91863	6.45517	4.09693	7.08563							forward	-3	-3	-3	-3	-3	-3
A_09_P020161	Euchromatic gene	12.4954	17.1813	11.0969	21.6017	19.8648	4894.55							forward	-3.34	-3.635	-4.025	-3.69	-4.275	4.01
A_09_P020166	Euchromatic gene	7.27946	3.33517	4.12587	3.38098	0	26.7331							forward	-1.04	-1.975	-2.96	-1.99	-3	0.575
A_09_P020171	Euchromatic gene	611.763	1577.56	2231.38	1769.57	1585.57	322.132							forward	0.28	1.245	1.905	1.535	1.325	-1.37
A_09_P020181	Euchromatic gene	3616.17	5824.05	1304.36	1270.23	1503.37	1065.92							forward	0.575	0.905	-0.81	-1.02	-0.845	-1.375
A_09_P020186	Euchromatic gene	1020.71	397.097	1383.38	2845.04	3119.71	213.578							forward	-0.035	-1.205	0.285	1.14	1.185	-2.74
A_09_P020191	Euchromatic gene	1196.11	2614.01	3384.28	3505.26	2888.44	450.726							forward	-0.09	0.84	1.295	1.205	0.94	-1.71
A_09_P020196	Euchromatic gene	211.845	86.3248	191.433	321.381	353.761	16.1417							forward	2.06	-0.09	1.43	1.9	1.805	-2.925
A_09_P020201	Euchromatic gene	1162.04	323.667	643.437	1512.65	1288.12	57.0793							forward	0.885	-0.795	0.205	1.115	0.875	-4.04
A_09_P020206	Euchromatic gene	693.016	1477.39	2270.99	1833.57	1306.61	415.073							forward	0.64	1.48	2.03	1.585	1.135	-0.535
A_09_P020211	Euchromatic gene	903.301	578.532	297.188	431.368	458.249	704.183							forward	1	0.3	-0.745	-0.33	-0.435	-0.145
A_09_P020216	Euchromatic gene	1971.41	3828.39	7813.37	8432.03	7601.48	117.915							forward	-0.135	0.5	1.35	1.52	1.36	-4.715
A_09_P020221	Euchromatic gene	38.5292	204.064	750.143	559.843	453.79	399.448							forward	-3.22	-1.75	-0.065	0.01	-0.335	-1.355
A_09_P020226	Euchromatic gene	559.744	75.268	97.8166	62.1052	55.6109	25.5877							forward	3.075	-0.68	0.05	-0.96	-1.19	-2.89
A_09_P020231	Euchromatic gene	831.475	1399.11	1791.47	1365.29	839.556	1095.94							forward	0.38	0.825	1.305	0.79	0.165	0.505
A_09_P020236	Euchromatic gene	398.123	642.356	219.277	203.995	200.644	152.704							forward	1.4	1.775	0.025	-0.25	-0.345	-1.145
A_09_P020241	Euchromatic gene	1256.46	2450.13	2034.96	1794.77	1975.72	931.697							forward	-0.295	0.23	0.545	0.34	0.425	-0.83
A_09_P020246	Euchromatic gene	87.3675	86.3933	51.0072	166.046	250.73	36.9146							forward	1.26	0.22	0.335	1.55	2	-0.62
A_09_P020251	Euchromatic gene	906.952	758.276	60.6678	130.599	179.798	110.563							forward	1.57	1.2	-2.34	-1.52	-1.135	-2.185
A_09_P020256	Euchromatic gene	4746.27	8699.03	10957.1	12990	12563.6	218.456							forward	0.025	0.47	0.86	0.96	0.87	-4.845
A_09_P020261	Euchromatic gene	2.53906	2.76912	1.35057	2.62985	0	20.7045							forward	-3	-2.26	-2.635	-2.235	-2.395	0.675
A_09_P020266	Euchromatic gene	0.920703	0.189903	3.36513	0.0709441	0	3.99079							forward	-1.705	-3	-3	-2.12	-2.135	-1.935
A_09_P020271	Euchromatic gene	2019.57	4636.13	2863.14	1558.97	1628.5	1099.49							forward	0.31	1.045	0.825	0.075	0.035	-0.51
A_09_P020276	Euchromatic gene	484.857	43.0447	22.4707	8.71551	7.03271	9.01571							forward	3.39	-0.985	-1.965	-3.725	-3.53	-3.625
A_09_P020281	Euchromatic gene	367.616	768.36	128.884	106.488	107.789	19.9567							forward	1.815	1.955	-0.15	-0.465	-0.585	-4.32
A_09_P020286	Euchromatic gene	1359.82	3125.66	935.471	270.306	261.701	598.294							forward	0.775	1.61	0.365	-1.595	-1.69	-0.455
A_09_P020296	Euchromatic gene	1107.42	1337.7	3812.32	5826.99	4931.93	1227.16							forward	-0.235	-0.2	1.3	1.815	1.66	-0.25
A_09_P020301	Euchromatic gene	1951.93	1840.58	1283.35	1203.66	1300.46	1792.06							forward	0.225	0.1	-0.175	-0.225	-0.365	-0.03
A_09_P020306	Euchromatic gene	24.7299	828.669	1523.66	694.846	602.939	3479.64							forward	-3.185	1.13	2.03	1.05	0.75	3.01
A_09_P020311	Euchromatic gene	3.59509	2.66167	2.80086	2.38515	1.92286	4.63378							forward	-3	-3	-3	-3	-3	-3
A_09_P020316	Euchromatic gene	12.1124	28.6943	11.6845	24.5568	14.1055	609.943							forward	-2.95	-2.53	-3.63	-3.515	-3.81	1.795
A_09_P020321	Euchromatic gene	0	0.487763	0.84814	4.07469	4.55461	19.8495							forward	-1.995	-2.93	-2.61	-2.37	-2.88	0.21
A_09_P020326	Euchromatic gene	1273.5	2045.45	592.87	1278.06	2051.79	318.348							forward	0.26	0.71	-0.62	0.36	0.94	-2.085
A_09_P020331	Euchromatic gene	13.5749	14.3197	14.6967	12.8004	14.6219	21.9201							forward	0.445	-1.21	-0.085	-0.78	-0.33	0.17
A_09_P020336	Euchromatic gene	5.84218	16.211	38.5154	94.7543	83.5773	489.324							forward	-4.07	-2.37	-0.935	-0.15	-0.565	2.7
A_09_P020341	Euchromatic gene	28.9001	110.406	579.417	1868.51	2194.2	841.205							forward	-4.145	-2.745	-0.42	1.12	1.36	-0.325
A_09_P020346	Euchromatic gene	100.911	170.14	180.563	222.522	228.944	31264.9							forward	-6.275	-5.55	-5.225	-5.115	-5.19	1.52
A_09_P020351	Euchromatic gene	643.959	1580.73	1862.99	1189.06	643.036	151.986							forward	0.29	1.085	1.505	1.095	0.07	-2.475
A_09_P020356	Euchromatic gene	5.1985	5.71235	1.06296	9.70252	3.73837	40.6699							forward	-3.885	-5.11	-5.525	-4.145	-5.13	-1.2
A_09_P020361	Euchromatic gene	1345.3	1044.68	839.608	1103.53	1187.17	4882.07							forward	-0.2	-0.565	-0.865	-0.495	-0.505	1.435
A_09_P020366	Euchromatic gene	211.238	307.093	296.149	539.724	1548.98	21126.4							forward	-4.465	-3.955	-3.68	-3.27	-1.91	1.495
A_09_P020371	Euchromatic gene	11.9914	7.86227	6.44954	22.6274	54.0341	379.512							forward	-5.245	-6.88	-7.9	-5.92	-3.795	-1.245
A_09_P020376	Euchromatic gene	1.5831	8.08145	5.02396	10.6682	5.40808	933.698							forward	-7.71	-7.07	-8.01	-7.905	-8.11	0.46
A_09_P020381	Euchromatic gene	103.957	41.098	231.717	404.873	510.006	474.948							forward	-0.035	-2.39	0.37	0.87	1.16	0.925
A_09_P020386	Euchromatic gene	1.87911	0	2.75616	0	10.2363	0.323274							forward	-3	-3	-3	-3	-3	-3
A_09_P020396	Euchromatic gene	6.77743	5.3738	6.67666	2.46663	4.4769	5.15092							forward	-3	-3	-3	-3	-3	-3
A_09_P020401	Euchromatic gene	0.126279	1.84727	2.34768	6.14826	3.33231	12.1306							forward	-3	-3	-3	-3	-3	-3
A_09_P020406	Euchromatic gene	5.72666	3.76497	5.14826	7.31552	9.50294	2502.65							forward	-6.12	-7.19	-7.49	-6.395	-5.715	2.955
A_09_P020411	Euchromatic gene	3.12695	0.994051	2.30654	0	0	8.17255							forward	-3	-3	-3	-3	-3	-3
A_09_P020416	Euchromatic gene	6.3884	10.5845	16.4207	12.839	6.68806	2313.49							forward	-4.655	-5.175	-3.07	-5.06	-6.17	3.665
A_09_P020421	Euchromatic gene	2.213	3.93816	1.62434	3.96898	5.55858	1023.87							forward	-2.435	-3.37	-3.565	-3.63	-3.96	4.705
A_09_P020426	Euchromatic gene	5.15783	2.96613	1.21893	0	1.10904	33.8689							forward	-1.655	-2.325	-3	-3	-3	1.925
A_09_P020431	Euchromatic gene	1.1768	20.0203	23.1582	10.1914	15.5669	17.7228							forward	-2.125	0.46	1.025	-0.565	-0.19	0.315
A_09_P020436	Euchromatic gene	2.41701	8.96667	19.4001	14.0634	17.6751	49.6567							forward	-3.24	-2.76	-0.5	-2.51	-1.355	0.665
A_09_P020441	Euchromatic gene	2.03296	5.40161	0	2.54842	0.314928	1.29873							forward	-3	-3	-3	-3	-3	-3
A_09_P020446	Euchromatic gene	14.1242	4.25187	3.24873	0.766498	6.38655	10.6818							forward	-1.495	-4.145	-4.45	-3.84	-4.24	-1.92
A_09_P020451	Euchromatic gene	0.922678	2.22873	0.0830663	3.49057	4.91521	356.542							forward	-1.74	-2.205	-2.56	-2.005	-2.765	5.04
A_09_P020456	Euchromatic gene	0.150899	0.943858	0	2.48733	5.73557	0							forward	-3	-3	-3	-3	-3	-3
A_09_P020461	Euchromatic gene	16.8083	15.0378	15.3068	15.8429	10.4864	38404.3							forward	-4.255	-5.16	-5.255	-5.985	-6.12	5.405
A_09_P020466	Euchromatic gene	3.42514	0	4.95027	5.24865	4.27113	5.39314							forward	-3	-3	-3	-3	-3	-3
A_09_P020471	Euchromatic gene	1.65924	5.2244	1.95729	6.71704	1.72569	27.7305							forward	-1.54	-1.9	-3	-3	-2.385	1.325
A_09_P020476	Euchromatic gene	5.0484	75.1951	231.373	230.389	56.9256	161.02							forward	-2.71	1.23	2.885	2.595	0.215	1.72
A_09_P020481	Euchromatic gene	6.30442	6.80557	7.88404	16.867	10.4336	2.94527							forward	-3	-3	-3	1.1	-3	-3
A_09_P020486	Euchromatic gene	4541.44	7271.09	6009.36	7314.25	9113.75	1357.23							forward	0.015	0.145	-0.03	0.23	0.46	-2.215
A_09_P020491	Euchromatic gene	195.487	110.393	80.453	72.2783	82.9614	4515.82							forward	-1.905	-2.96	-3.35	-3.815	-3.675	1.925
A_09_P020496	Euchromatic gene	2240.1	400.867	936.839	879.725	959.423	1309.48							forward	1.02	-1.07	-0.265	-0.395	-0.29	0.035
A_09_P020501	Euchromatic gene	2273.04	3660.19	3131.6	1682.16	1303.65	387.307							forward	0.635	1.105	1.04	0.215	-0.15	-2.19
A_09_P020506	Euchromatic gene	599.539	50.7471	37.2618	52.5688	109.476	186.386							forward	1.695	-2.185	-2.44	-1.99	-0.83	-0.935
A_09_P020511	Euchromatic gene	0	1.36471	1.84298	0.305718	4.7246	0							forward	-3	-3	-3	-3	-3	-3
A_09_P020516	Euchromatic gene	17.8955	23.1389	33.3044	66.4633	55.5856	847.605							forward	-2.69	-3.16	-2.205	-1.525	-1.86	1.99
A_09_P020521	Euchromatic gene	1.94155	3.57396	8.32014	10.0572	4.44722	12.9264							forward	-5.25	-5.505	-4.745	-4.525	-6.35	-4.525
A_09_P020526	Euchromatic gene	6.35788	102.39	450.69	1146.65	1463.97	2727.55							forward	-5.67	-1.7	0.68	1.495	1.74	2.88
A_09_P020531	Euchromatic gene	84.4041	249.441	449.976	1635.46	2340.14	115.997							forward	-1.415	-0.625	0.37	1.795	2.185	-2.185
A_09_P020536	Euchromatic gene	3746.17	6031.94	6486.35	6697.09	6273.44	1192.65							forward	0.02	0.325	0.265	0.23	0.125	-1.795
A_09_P020541	Euchromatic gene	94.9874	96.8	101.337	84.4757	73.0151	46.4101							forward	1.5	1.175	0.955	0.86	0.635	-0.795
A_09_P020546	Euchromatic gene	524.703	131.185	27.0759	20.2596	26.6348	349.455							forward	2.15	-0.27	-2.68	-3.425	-3.24	0.85
A_09_P020551	Euchromatic gene	3518.63	802.713	240.798	524.472	898.036	551.785							forward	1.305	-0.8	-2.24	-1.31	-0.72	-1.48
A_09_P020556	Euchromatic gene	14.6427	23.2564	24.6658	69.5485	171.925	172.223							forward	-6.16	-5.97	-5.965	-4.64	-3.395	-3.625
A_09_P020561	Euchromatic gene	5107	3301.59	704.121	2604.93	7728.08	3818.91							forward	0.395	-0.755	-2.48	-0.85	0.575	-0.505
A_09_P020566	Euchromatic gene	363.546	334.813	108.165	173.105	118.25	85.6478							forward	1.93	1.275	-0.27	0.025	-0.695	-1.235
A_09_P020571	Euchromatic gene	0	3.03003	1.62271	2.40911	4.60588	56.3014							forward	-1.68	-2.705	-3	-1.84	-1.69	1.9
A_09_P020576	Euchromatic gene	11.609	15.5968	26.6041	112.809	138.523	502.615							forward	-3.305	-3.775	-2.6	-0.97	-0.605	1.315
A_09_P020581	Euchromatic gene	14.0663	23.7335	18.461	54.0303	51.1004	4189.22							forward	-3.245	-3.545	-3.65	-2.5	-2.93	3.52
A_09_P020586	Euchromatic gene	3.74463	26.4944	30.8241	26.9411	20.1071	3.68362							forward	-3.525	-0.625	-0.205	-0.665	-1.655	-3.835
A_09_P020591	Euchromatic gene	10631.8	16619.2	19616	27783.9	35589.7	7254.27							forward	0.4	0.515	0.615	0.895	1.285	-1.21
A_09_P020596	Euchromatic gene	1027.75	34.6349	42.7917	141.878	204.161	130.357							forward	2.32	-2.825	-2.315	-0.845	-0.435	-1.165
A_09_P020601	Euchromatic gene	24610.1	37746.2	48100.3	51487.1	55086.4	88324.7							forward	0.31	0.03	0.065	0.05	0.03	-0.055
A_09_P020606	Euchromatic gene	116.22	259.808	368.807	410.012	425.708	55.5461							forward	0.665	0.975	1.875	1.64	1.62	-1.465
A_09_P020611	Euchromatic gene	337.147	145.38	239.566	523.949	767.127	432.048							forward	0.01	-1.455	-0.53	0.245	0.765	-0.235
A_09_P020616	Euchromatic gene	39.5709	11.4638	10.2787	12.069	9.99568	10.5935							forward	2.97	-1.015	-3	-3	-3	0.445
A_09_P020621	Euchromatic gene	2290.18	184.391	728.907	1049.4	715.899	1169.9							forward	1.45	-1.765	0.055	0.415	-0.175	0.385
A_09_P020626	Euchromatic gene	3987.24	1036.18	1179.42	1373.63	1792.44	2557.95							forward	0.895	-1.045	-0.81	-0.665	-0.385	0.015
A_09_P020631	Euchromatic gene	2306.98	5757.03	5717.42	2688.37	1881.33	2708.29							forward	-0.25	0.765	0.765	-0.145	-0.685	-0.24
A_09_P020636	Euchromatic gene	1460.7	197.394	467.561	607.503	639.525	609.65							forward	1.13	-1.295	-0.095	-0.12	-0.04	-0.075
A_09_P020641	Euchromatic gene	4639.73	1606.4	1816.99	2016.02	2089.51	4743.55							forward	0.42	-1.32	-1.145	-1.01	-1.055	-0.17
A_09_P020646	Euchromatic gene	321.009	708.023	948.897	936.647	1342.86	649.192							forward	0.195	0.86	1.32	1.515	1.89	0.44
A_09_P020651	Euchromatic gene	3413.04	1747.79	450.586	558.028	618.311	2013.9							forward	0.79	-0.34	-2.01	-1.915	-1.84	-0.35
A_09_P020656	Euchromatic gene	1805.21	3804.46	4440.16	1597.12	1331.76	116.776							forward	0.485	1.32	1.57	0.14	-0.125	-3.78
A_09_P020661	Euchromatic gene	579.481	411.94	245.167	266.321	253.35	42.0988							forward	1.965	0.91	0.275	0.3	-0.06	-3.085
A_09_P020666	Euchromatic gene	1878.72	131.655	36.7483	28.8452	33.4795	495.779							forward	1.425	-2.205	-3.82	-4.65	-4.615	-0.715
A_09_P020671	Euchromatic gene	7.52285	14.1977	7.05282	10.9985	10.3855	4.38669							forward	-3	-3	-3	-3	-3	-3
A_09_P020676	Euchromatic gene	3043.54	5730.32	5265.92	5449.97	3727.39	1587.76							forward	-0.16	0.39	0.69	0.47	-0.115	-1.22
A_09_P020681	Euchromatic gene	402.151	46.3207	62.5737	148.116	209.368	700.663							forward	0.415	-2.99	-2.44	-1.495	-1.04	0.51
A_09_P020686	Euchromatic gene	40.5462	187.944	230.696	390.383	422.091	710.646							forward	-1.875	-0.43	0.04	0.295	0.34	1.225
A_09_P020691	Euchromatic gene	18.5055	15.6724	16.6531	13.5634	17.5151	7.45362							forward	1.745	-3	0.84	0.22	0.435	-1.04
A_09_P020696	Euchromatic gene	4.75642	5.7505	8.56167	18.1633	23.7119	8.76005							forward	-2.36	-2.115	-1	-1.26	-0.395	-1.68
A_09_P020701	Euchromatic gene	3141.69	5465.12	2311.94	946.972	726.732	872.453							forward	0.585	1.035	-0.055	-1.295	-1.625	-1.43
A_09_P020706	Euchromatic gene	15.7901	68.3113	79.7968	382.527	1176.72	2071.54							forward	-5.535	-3.805	-3.57	-1.48	-0.165	0.47
A_09_P020711	Euchromatic gene	5.92458	7.77811	4.54674	6.08889	3.13519	1654.2							forward	-5.205	-5.92	-6.7	-5.615	-6.715	3.12
A_09_P020716	Euchromatic gene	6.90452	7.37765	6.66107	3.09568	2.9109	29.3895							forward	-3	-3	-1.04	-2.135	-2.43	1.905
A_09_P020721	Euchromatic gene	8.70032	23.1083	70.2459	67.7805	31.8106	3226.73							forward	-4.71	-3.45	-1.635	-2.08	-3.24	3.595
A_09_P020731	Euchromatic gene	1251.37	2939.56	3966.66	3128.94	3024.55	937.415							forward	-0.24	0.685	1.35	0.885	0.745	-0.835
A_09_P020736	Euchromatic gene	7.2899	13.0562	14.9902	36.2889	40.1299	104.845							forward	-3.785	-4.515	-2.55	-1.99	-1.715	-0.455
A_09_P020741	Euchromatic gene	11466.3	15392	12450.3	6549.03	2198.03	681.364							forward	0.705	0.785	0.17	-0.77	-2.425	-4.09
A_09_P020746	Euchromatic gene	1606.55	2731.07	3337.45	4841.53	6077.64	1756.23							forward	-0.7	-0.225	0.055	0.35	0.555	-1.13
A_09_P020751	Euchromatic gene	3738.8	7904.71	8369.37	9468.86	7914.09	716.584							forward	0.05	0.64	0.895	0.93	0.71	-2.57
A_09_P020756	Euchromatic gene	760.513	492.941	706.731	1018.48	891.326	225.059							forward	1.085	0.315	1.02	1.115	0.955	-1.465
A_09_P020761	Euchromatic gene	943.551	888.924	265.017	521.648	692.136	151.818							forward	0.975	0.76	-0.75	0.12	0.435	-2.265
A_09_P020766	Euchromatic gene	37.015	15.0268	5.39592	10.8425	7.22322	8.57743							forward	2.78	0.145	-1.65	-3	-3	-0.57
A_09_P020771	Euchromatic gene	2210.34	3111.34	745.271	774.147	1075.58	242.149							forward	0.68	0.885	-0.575	-0.6	-0.175	-2.735
A_09_P020776	Euchromatic gene	8.93033	6.93226	6.96891	9.7667	11.6037	2066.54							forward	-5.01	-6.395	-6.15	-5.28	-5.645	2.88
A_09_P020781	Euchromatic gene	6.46367	14.8814	39.8885	278.855	484.834	10618.7							forward	-5.54	-5.765	-3.75	-0.955	-0.295	4.055
A_09_P020786	Euchromatic gene	0.750549	2.56203	4.7865	3.24865	1.92133	34.5177							forward	-1.855	-2.06	-2.875	-2.165	-2.9	1.58
A_09_P020791	Euchromatic gene	8.92699	4.82841	5.32503	12.7074	4.63222	475.042							forward	-2.72	-3.97	-4.305	-4.83	-5.02	2.63
A_09_P020796	Euchromatic gene	10.746	3.62139	6.17278	5.62566	5.31333	1400.69							forward	-2.59	-4.055	-3.915	-4.26	-4.35	4.565
A_09_P020801	Euchromatic gene	7139.23	1304.02	136.055	121.942	328.508	973.611							forward	1.4	-1.385	-4.025	-4.195	-3.075	-1.915
A_09_P020806	Euchromatic gene	3538.64	616.563	54.8458	45.1335	21.2585	2912.17							forward	1.005	-1.445	-4.63	-5.05	-6.125	0.69
A_09_P020811	Euchromatic gene	4313.97	8077.62	7407.15	7529.58	8248.61	2771.81							forward	-0.35	0.1	-0.04	-0.05	0.045	-1.385
A_09_P020816	Euchromatic gene	442.978	49.7461	188.998	293.045	284.214	336.451							forward	0.785	-2.93	-0.465	-0.195	-0.345	-0.27
A_09_P020821	Euchromatic gene	690.594	124.643	68.5831	106.918	64.0504	244.044							forward	1.795	-1.035	-1.845	-1.585	-2.375	-0.605
A_09_P020826	Euchromatic gene	601.46	458.906	259.904	356.775	280.652	191.767							forward	1.485	0.69	0.19	0.315	-0.17	-1.045
A_09_P020831	Euchromatic gene	2403.88	4680.38	4257.41	3880.72	3141.48	335.127							forward	0.035	0.695	0.755	0.58	0.195	-2.955
A_09_P020836	Euchromatic gene	3875.56	7654.85	8101.29	8762.33	7693	2488.33							forward	-0.575	-0.095	0.085	0.19	0.05	-1.435
A_09_P020841	Euchromatic gene	1132.53	1284.63	1661.19	1730.68	1566.02	471.541							forward	0.56	0.63	1.055	0.84	0.6	-0.94
A_09_P020846	Euchromatic gene	4.20643	8.93238	7.98464	6.00245	7.26683	6.65319							forward	-3	-3	-3	-3	-3	-3
A_09_P020851	Euchromatic gene	1.67856	0.23028	0.609827	0.22813	1.23291	0							forward	-3	-3	-3	-3	-3	-3
A_09_P020856	Euchromatic gene	4.79764	11.428	4.35273	7.2436	4.02294	26.721							forward	-1.605	-2.215	-1.745	-2.55	-2.455	0.695
A_09_P020861	Euchromatic gene	1549.46	459.96	514.881	689.482	619.195	656.761							forward	1.31	-0.315	0.01	0.135	-0.03	-0.055
A_09_P020866	Euchromatic gene	3.87066	2.52862	4.86957	8.34645	2.56434	7.60114							forward	-3	-3	-3	-3	-3	-0.57
A_09_P020871	Euchromatic gene	425.381	40.6614	99.0612	252.089	231.487	31.4864							forward	2.695	-1.65	0.34	1.125	0.885	-1.95
A_09_P020876	Euchromatic gene	1.49385	28.7478	25.0097	12.2136	3.38021	305.044							forward	-2.965	0.235	0.015	-1.58	-3.69	3.885
A_09_P020881	Euchromatic gene	16.9571	11.4641	22.1908	19.3945	14.5435	4522.05							forward	-3.055	-4.235	-3.29	-4.055	-4.725	3.93
A_09_P020886	Euchromatic gene	8592.72	20944.2	36440	46514.2	38907.6	10135.9							forward	-0.51	0.245	1.235	1.43	1.19	-1.22
A_09_P020891	Euchromatic gene	2309.14	5308.25	5014.22	2925.99	2443.73	1524.26							forward	0.155	0.975	0.96	0.315	0.025	-0.615
A_09_P020896	Euchromatic gene	1835.51	3563.25	2103.88	2032.51	2355.61	447.18							forward	0.31	0.82	0.43	0.225	0.395	-2.01
A_09_P020901	Euchromatic gene	3014.25	5359.24	6761.15	7706.46	8110.34	6882.8							forward	-0.59	-0.165	0.17	0.4	0.37	0.095
A_09_P020906	Euchromatic gene	1119.81	1739.25	1194.47	1267.29	1432.51	287.285							forward	0.44	0.97	0.605	0.56	0.675	-1.79
A_09_P020911	Euchromatic gene	25.612	24.3071	22.0428	43.9444	39.9243	1.94876							forward	1.41	1.035	1.195	1.61	1.405	-2.74
A_09_P020916	Euchromatic gene	0.1264	2.19953	2.17773	9.41438	10.4274	0							forward	-3	-3	-3	-3	-3	-3
A_09_P020921	Euchromatic gene	1.11628	3.01657	5.505	4.09236	6.36446	0.373543							forward	-3	-3	-3	-3	-3	-3
A_09_P020926	Euchromatic gene	414.118	1160.72	2056.28	2718.81	1786.01	301.29							forward	-0.5	0.615	1.595	1.69	1.095	-1.305
A_09_P020931	Euchromatic gene	888.991	1533.57	1198.6	1195.89	904.56	669.417							forward	0.15	0.715	0.635	0.45	0.03	-0.575
A_09_P020936	Euchromatic gene	2.41166	4.32881	6.88263	7.7574	6.95896	16.2828							forward	-1.54	-3	-1.235	-3	-3	0.66
A_09_P020941	Euchromatic gene	0	0.0870259	3.17672	2.90247	4.01943	4.10132							forward	-3	-3	-3	-3	-3	-3
A_09_P020946	Euchromatic gene	3.03643	1.14603	4.30361	2.07264	4.81072	159.653							forward	-2.93	-3.28	-3.915	-3.345	-4	2.205
A_09_P020951	Euchromatic gene	5.264	1.93377	1.52891	0.35202	5.86841	20.9979							forward	-1.995	-2.43	-2.535	-2.325	-2.55	1.055
A_09_P020956	Euchromatic gene	48.6279	80.2968	74.8617	93.8623	89.0806	13526							forward	-3.2	-3.15	-3.265	-3.215	-3.42	3.185
A_09_P020961	Euchromatic gene	23.3183	27.9322	26.2663	33.1756	33.8921	23130.2							forward	-2.165	-2.65	-2.88	-2.94	-2.88	4.605
A_09_P020966	Euchromatic gene	3.30381	0	12.8712	6.37245	11.4359	2.85553							forward	-3	-3	-3	-3	-3	-3
A_09_P020971	Euchromatic gene	8.94913	7.3848	9.77173	8.92347	15.2129	5225.1							forward	-6.835	-7.26	-7.305	-7.555	-6.285	2.105
A_09_P020976	Euchromatic gene	86.4652	136.19	129.488	147.283	160.611	17240							forward	-3.445	-3.215	-3.19	-3.205	-3.15	2.795
A_09_P020981	Euchromatic gene	73.8944	25.7599	25.022	44.8891	44.0416	118.191							forward	1.195	-0.835	-0.925	-0.42	-0.205	1.29
A_09_P020986	Euchromatic gene	2541.41	654.439	60.3691	508.754	2521.29	1057.22							forward	0.535	-1.375	-4.47	-1.625	0.485	-0.915
A_09_P020991	Euchromatic gene	668.785	293.655	392.316	557.478	793.942	423.651							forward	0.915	-0.605	0.19	0.48	0.865	-0.455
A_09_P020996	Euchromatic gene	0	0	0	0	2.38251	3.3001							forward	-3	-3	-3	-3	-3	-3
A_09_P021001	Euchromatic gene	0.548534	2.22444	0	0.11322	2.48455	1.92824							forward	-3	-1.605	-3	-3	-3	-3
A_09_P021006	Euchromatic gene	8.64008	1.89957	21.2274	39.1275	17.2952	17.11							forward	-1.51	-3.33	0.52	0.56	-0.87	-0.235
A_09_P021011	Euchromatic gene	262.784	144.055	59.2188	58.9697	38.986	141.237							forward	1.275	0.17	-1.27	-1.825	-2.55	-0.315
A_09_P021016	Euchromatic gene	1.58368	3.28548	9.2447	13.0998	0.88399	204.871							forward	-3	-2.255	-0.16	-0.045	-2.11	4.545
A_09_P021021	Euchromatic gene	4.80231	7.19634	7.94125	10.6064	3.66877	87.4567							forward	-1.295	-1.14	-1.025	0.005	-2.055	2.815
A_09_P021026	Euchromatic gene	67.2883	97.4925	82.0855	102.202	82.6571	4140.78							forward	-4.54	-4.315	-4.475	-4.46	-4.79	0.555
A_09_P021031	Euchromatic gene	2.47284	0.708813	1.55182	3.51811	6.66085	22.378							forward	-2.695	-2.735	-3.445	-3.3	-3.545	0.215
A_09_P021036	Euchromatic gene	33.5213	12.6635	12.9834	44.3667	60.757	51.8978							forward	0.685	-1.39	-0.925	0.26	0.715	1.015
A_09_P021041	Euchromatic gene	41.5079	34.3039	37.0058	28.8861	26.1287	23.6448							forward	1.255	0.985	0.22	0.125	0.04	-0.77
A_09_P021046	Euchromatic gene	2.56271	2.52316	2.96992	2.01905	4.27557	2.94171							forward	-3	-3	-3	-3	-3	-3
A_09_P021051	Euchromatic gene	27.3482	23.4235	13.339	4.29325	5.48593	6.55661							forward	2.355	1.775	-3	-3	-3	-0.625
A_09_P021056	Euchromatic gene	2.68824	6.08465	0.929371	2.33366	6.40389	5.59284							forward	-3	-3	-3	-3	-3	-3
A_09_P021061	Euchromatic gene	4.46184	12.9026	41.0433	42.8713	49.4001	325.153							forward	-4.315	-3.07	-1.025	-1.255	-1.43	1.855
A_09_P021066	Euchromatic gene	3234.1	5264.85	4675.52	4150.38	2961.74	1560.47							forward	0.325	0.75	0.735	0.395	-0.005	-0.805
A_09_P021071	Euchromatic gene	3.82909	12.244	22.8457	24.2048	17.9726	0.463765							forward	-3	-3	3.425	2.97	2.03	-3
A_09_P021076	Euchromatic gene	9523.83	18406.1	22826.1	25755.6	20701.3	642.178							forward	0.085	0.505	0.76	0.755	0.395	-4.625
A_09_P021086	Euchromatic gene	0	3.65963	0.826751	1.84156	1.43083	0.812674							forward	-3	-3	-3	-3	-3	-3
A_09_P021091	Euchromatic gene	2.38768	1.37937	3.81696	3.64112	2.44997	5.16816							forward	-3	-3	-3	-3	-3	-3
A_09_P021096	Euchromatic gene	87.1072	49.7916	128.245	29.9274	18.8837	15.5182							forward	1.78	1.44	1.75	0.23	-0.4	-1.905
A_09_P021101	Euchromatic gene	4.77926	47.1056	11.4721	15.1574	10.5803	760.511							forward	-5.3	-1.49	-3.76	-3.375	-3.925	2.66
A_09_P021106	Euchromatic gene	279.286	446.379	466.953	414.738	243.251	18.733							forward	1.685	1.755	1.985	1.245	0.39	-3.73
A_09_P021111	Euchromatic gene	2.69565	10.4127	7.74031	13.1517	8.06292	20.6827							forward	-2.925	-2.345	-2.255	-2.705	-2.895	-1.5
A_09_P021116	Euchromatic gene	1293.82	1166.69	1085.85	1043.22	1038.53	800.388							forward	0.625	0.515	0.475	0.235	0.185	-0.25
A_09_P021121	Euchromatic gene	6.11904	48.6827	54.9599	80.5575	115.009	94.6359							forward	-3.54	0.12	0.67	1.195	1.115	1.49
A_09_P021126	Euchromatic gene	1224.6	2540.47	1876.09	518.359	1086.04	1177.26							forward	-0.08	0.605	0.435	-1.54	-0.52	-0.23
A_09_P021131	Euchromatic gene	4.01091	3.02825	4.16884	4.32594	1.48885	49.4611							forward	-2.045	-3.03	-3.285	-2.095	-2.985	1.475
A_09_P021136	Euchromatic gene	9.99629	3.18453	8.36826	8.18005	9.70707	17.7526							forward	-3	-0.795	-0.74	-1.335	-0.885	0
A_09_P021141	Euchromatic gene	0	3.20058	0.201374	6.44516	2.69736	4.17961							forward	-3	-3	-3	-3	-3	-3
A_09_P021146	Euchromatic gene	0.759229	1.20468	2.75481	0	5.5543	6.10423							forward	-3	-3	-3	-3	-3	-3
A_09_P021151	Euchromatic gene	1.50769	3.05041	1.72427	5.78266	11.6836	2029.16							forward	-7.495	-8.175	-7.725	-6.875	-6.82	1.56
A_09_P021156	Euchromatic gene	515.729	1060.58	860.945	1075.57	1096.52	430.191							forward	0.665	1.645	1.305	1.315	1.31	-0.26
A_09_P021166	Euchromatic gene	6.71955	4.21339	10.1266	2.49381	8.44697	0.435311							forward	0.095	-1.96	-0.635	-1.85	-1.015	-2.515
A_09_P021171	Euchromatic gene	1373.37	1154.32	250.22	439.235	414.195	513.372							forward	0.98	0.59	-1.19	-0.555	-0.665	-0.625
A_09_P021176	Euchromatic gene	36.8342	50.4325	60.012	447.832	2000.83	9454.64							forward	-5.87	-5.61	-5.28	-2.84	-0.8	1.175
A_09_P021181	Euchromatic gene	9054.14	15068.6	21707.2	22461.6	23363.3	28961.7							forward	-0.425	-0.03	0.145	0.05	0.005	0.15
A_09_P021186	Euchromatic gene	0.00604487	12.0619	21.581	9.17051	3.95846	15.3391							forward	-3.48	-2.095	-0.82	-4.145	-4.55	-2.5
A_09_P021191	Euchromatic gene	34.5244	17.8301	28.3185	28.162	30.378	161.232							forward	1.105	-0.305	-0.07	-0.115	-0.43	2.12
A_09_P021196	Euchromatic gene	1.34824	1.76163	2.08113	4.73618	5.47277	3.09729							forward	-3	-3	-3	-3	-3	-3
A_09_P021201	Euchromatic gene	2.73842	6.03996	5.87756	8.99063	12.0747	11.0399							forward	-3.22	-4.165	-3.305	-3.275	-3.17	-2.36
A_09_P021206	Euchromatic gene	16.8172	29.3938	22.78	34.4997	24.5097	10056.9							forward	-4.49	-4.87	-5.085	-4.56	-4.73	3.555
A_09_P021211	Euchromatic gene	7.94549	4.93597	4.38032	3.13457	1.47555	4.63241							forward	-3	-3	-3	-3	-3	-3
A_09_P021216	Euchromatic gene	1583.95	240.024	54.7905	47.8015	68.1228	1762.57							forward	0.91	-1.53	-3.69	-3.875	-3.395	1.02
A_09_P021221	Euchromatic gene	205.123	361.754	647.437	1348.26	1470.33	1125.13							forward	-0.64	-0.245	0.4	1.26	1.415	0.805
A_09_P021226	Euchromatic gene	562.274	551.926	1039.21	1386.85	1463.28	246.543							forward	0.225	-0.065	0.975	1.185	1.22	-1.44
A_09_P021231	Euchromatic gene	4.38908	7.11933	9.0758	2.76923	19.137	3485							forward	-5.05	-5.965	-5.94	-6.535	-4.535	3.975
A_09_P021236	Euchromatic gene	4.86621	5.50361	5.08555	7.98828	17.913	1228.76							forward	-4.735	-4.995	-4.95	-4.465	-3.365	3.71
A_09_P021241	Euchromatic gene	390.34	676.303	984.015	1246.18	918.166	162.603							forward	0.995	1.135	1.435	1.61	1.175	-1.735
A_09_P021246	Euchromatic gene	1509.07	307.874	345.553	801.264	814.206	360.416							forward	1.165	-1.04	-0.71	0.17	0.12	-1.11
A_09_P021251	Euchromatic gene	24.2627	143.594	497.441	560.063	528.126	7275.7							forward	-5.035	-2.89	-1.125	-1.18	-1.2	2.23
A_09_P021256	Euchromatic gene	5102.67	1055.94	1451.84	3012.22	4247.51	409.036							forward	1.135	-1.33	-0.67	0.12	0.62	-2.835
A_09_P021261	Euchromatic gene	4378.58	807.631	887.608	1275.57	1678.63	1906.26							forward	0.715	-1.67	-1.62	-1.265	-0.895	-0.745
A_09_P021266	Euchromatic gene	1022.24	86.2932	25.6131	32.1443	36.547	172.161							forward	1.74	-1.655	-3.475	-3.535	-3.6	-1.415
A_09_P021271	Euchromatic gene	1537.93	309.692	292.285	453.03	265.148	1172.33							forward	1.28	-0.845	-0.925	-0.365	-1.185	0.635
A_09_P021276	Euchromatic gene	19.8595	4.76692	7.67242	15.9821	8.04418	16.4918							forward	-0.88	-4.15	-2.845	-2.645	-4.29	-2.27
A_09_P021281	Euchromatic gene	2094.79	1394.17	326.28	877.8	1258.4	2150.91							forward	0.585	-0.135	-1.7	-0.74	-0.28	0.675
A_09_P021286	Euchromatic gene	34.6388	47.4158	46.729	168.583	252.087	8051.71							forward	-3.325	-3.775	-3.805	-2.225	-1.58	2.99
A_09_P021291	Euchromatic gene	568.232	587.273	190.857	261.996	245.271	79.7964							forward	1.69	1.21	-0.205	0.055	-0.125	-2.6
A_09_P021296	Euchromatic gene	1045.85	2175.51	1737.87	1857.48	1442.7	269.924							forward	0.405	1.285	0.94	0.865	0.53	-1.74
A_09_P021301	Euchromatic gene	2793.68	1401.86	1001.82	1770.78	1803.09	1050.81							forward	0.665	-0.525	-0.655	-0.055	0.01	-0.94
A_09_P021306	Euchromatic gene	1088.25	76.4749	312.355	677.438	727.536	461.258							forward	1.485	-2.335	-0.085	0.615	0.615	0.02
A_09_P021311	Euchromatic gene	517.056	912.031	62.2556	102.99	207.884	157.642							forward	0.77	1.16	-2.94	-2.15	-1.12	-2.075
A_09_P021316	Euchromatic gene	1.11168	1.60918	2.20005	2.84749	1.67875	1.58545							forward	-3	-3	-3	-3	-3	-3
A_09_P021321	Euchromatic gene	0.899829	2.1321	1.26896	4.19795	3.82099	2.24603							forward	-3	-3	-3	-3	-3	-3
A_09_P021326	Euchromatic gene	5.4643	160.045	100.019	66.0474	52.0066	452.388							forward	-5.075	0.495	0.125	-1.04	-1.55	1.885
A_09_P021331	Euchromatic gene	5.58083	4.98853	2.46738	7.04171	12.0131	48.7873							forward	-1.73	-2.41	-2.18	-1.06	-0.825	1.625
A_09_P021336	Euchromatic gene	7.24967	4.19741	4.26319	6.87857	7.07536	178.459							forward	-0.775	-2.915	-2.09	-1.575	-2.6	2.64
A_09_P021341	Euchromatic gene	3.94732	0.47244	0.809688	1.66812	2.77521	1.99874							forward	-3	-3	-3	-3	-3	-3
A_09_P021346	Euchromatic gene	0	0	0.248399	1.8145	3.36886	0							forward	-3	-3	-3	-3	-3	-3
A_09_P021351	Euchromatic gene	1.02531	1.41488	0	4.32639	4.29026	4.47948							forward	-3	-3	-3	-3	-3	-3
A_09_P021356	Euchromatic gene	6.21931	7.57893	5.38114	12.9887	5.33439	677.969							forward	-5.19	-5.81	-5.415	-4.5	-5.4	2.555
A_09_P021361	Euchromatic gene	3.46096	3.27079	0.997663	1.53043	0.181362	3.96699							forward	-3	-3	-3	-3	-3	-3
A_09_P021366	Euchromatic gene	2101.44	4276.96	794.398	931.658	994.669	113.942							forward	0.96	1.525	-0.135	-0.055	-0.12	-3.63
A_09_P021371	Euchromatic gene	624.793	150.519	493.712	681.701	585.097	206.039							forward	1.2	-0.64	0.145	0.595	0.5	-1.465
A_09_P021376	Euchromatic gene	4.80073	19.4343	46.5094	113.117	149.611	373.749							forward	-5.13	-3.055	-0.925	-0.025	0.215	1.805
A_09_P021381	Euchromatic gene	845.75	1841.56	1035.56	635.084	811.805	681.022							forward	0.055	0.99	0.365	-0.415	-0.16	-0.345
A_09_P021386	Euchromatic gene	3058.53	847.955	842.254	1222.36	1418.56	2392.12							forward	1.035	-0.62	-0.76	-0.56	-0.345	0.29
A_09_P021391	Euchromatic gene	1586.31	1135.38	3410.06	4250.13	3170.25	1394.17							forward	-0.375	-0.96	0.575	0.795	0.405	-0.875
A_09_P021396	Euchromatic gene	3743.68	5638.96	2522.3	2419.74	3154	1851.88							forward	0.485	0.78	-0.36	-0.375	-0.045	-0.9
A_09_P021401	Euchromatic gene	3371.46	3920.07	2918.15	3585.37	3738.45	1251.98							forward	0.315	0.17	0.03	0.195	0.24	-1.23
A_09_P021406	Euchromatic gene	18023.7	35160.2	38739	37565.5	27431.8	20367.8							forward	0.305	0.57	0.63	0.07	-0.505	-1.195
A_09_P021411	Euchromatic gene	98.9191	241.961	244.688	354.012	433.48	29.2075							forward	0.42	1.03	1.375	1.77	1.705	-2.445
A_09_P021416	Euchromatic gene	656.052	878.568	1289.89	2364.31	3936.59	3629.51							forward	-1.39	-1.05	-0.415	0.3	0.84	0.91
A_09_P021421	Euchromatic gene	2506.21	2544.95	1610.88	1483.14	1502.08	445.3							forward	0.495	0.425	-0.06	-0.315	-0.29	-2.255
A_09_P021426	Euchromatic gene	171.051	408.044	274.474	308.087	249.672	18.6466							forward	1.71	2.385	2.305	1.925	1.58	-2.575
A_09_P021431	Euchromatic gene	1189.79	100.932	336.357	506.522	424.092	878.893							forward	1.295	-2.19	-0.495	-0.025	-0.4	0.405
A_09_P021436	Euchromatic gene	1446.53	435.052	891.758	934.193	816.442	1436.19							forward	0.51	-1.075	0.09	-0.07	-0.285	0.53
A_09_P021441	Euchromatic gene	3405.22	6867.97	7273.6	4611.59	4003.01	734.696							forward	0.205	0.93	0.925	0.4	0.21	-2.32
A_09_P021446	Euchromatic gene	6504.56	9390.22	4078.66	2355.91	2545.23	4672.76							forward	0.205	0.26	-1.05	-1.855	-1.84	-1.02
A_09_P021456	Euchromatic gene	170.482	307.127	367.714	366.22	355.795	160.258							forward	0.705	0.795	1.17	0.83	0.745	-0.84
A_09_P021461	Euchromatic gene	0.769596	3.74183	0.949065	0.581162	3.62987	2.29407							forward	-3	-3	-3	-3	-3	-3
A_09_P021466	Euchromatic gene	129.286	132.116	85.8798	101.456	66.9139	3939.05							forward	-3.705	-3.76	-4.35	-4.305	-4.91	0.545
A_09_P021471	Euchromatic gene	6279.9	7434.17	5725	3962.64	3772.1	1635.87							forward	0.63	0.385	-0.025	-0.315	-0.45	-1.73
A_09_P021476	Euchromatic gene	1651.49	2775.86	730.618	595.17	1218.77	540.744							forward	0.725	1.23	-0.415	-0.695	0.145	-1.27
A_09_P021481	Euchromatic gene	7280.07	3538.87	2715.61	4581.03	6542.1	1915.48							forward	0.575	-1.1	-1.35	-0.705	-0.23	-2.06
A_09_P021486	Euchromatic gene	923.83	344.983	171.71	317.193	523.95	120.063							forward	1.315	-0.185	-1.125	-0.525	0.11	-2.3
A_09_P021491	Euchromatic gene	51.076	86.1054	74.993	129.452	68.3091	2897.08							forward	-2.36	-2.445	-2.645	-1.985	-3.005	2.265
A_09_P021496	Euchromatic gene	1.42263	9.53138	4.83259	9.90425	7.92634	548.719							forward	-3.14	-3.14	-3.095	-2.965	-3.005	3.515
A_09_P021501	Euchromatic gene	25.0885	110.033	157.449	198.85	146.651	243.07							forward	-0.88	0.61	1.29	1.29	0.67	1.675
A_09_P021506	Euchromatic gene	1775.97	3032.33	1235.13	569.866	621.132	2170.33							forward	0.455	0.98	0.015	-1.065	-1.005	0.425
A_09_P021511	Euchromatic gene	1169.7	1252.56	354.078	405.593	507.626	634.232							forward	0.75	0.91	-0.71	-0.545	-0.19	-0.215
A_09_P021516	Euchromatic gene	1354.5	2052.06	1745.01	1359.99	852.973	722.458							forward	0.625	1.105	0.94	0.325	-0.295	-0.585
A_09_P021521	Euchromatic gene	15.6422	209.702	629.063	782.164	751.919	465.34							forward	-3.895	-0.725	1.035	0.85	0.805	0.145
A_09_P021526	Euchromatic gene	11.9598	33.6195	70.507	112.555	70.0482	3.12582							forward	-1.39	0.515	1.86	2.245	1.39	-3.145
A_09_P021531	Euchromatic gene	2211.59	4347.76	6036.59	6838.76	6019.22	1934.94							forward	-0.235	0.385	0.935	0.955	0.72	-0.66
A_09_P021536	Euchromatic gene	9.5025	280.997	691.639	510.64	571.191	105.598							forward	-3.305	0.705	2.02	1.585	1.67	-1.335
A_09_P021541	Euchromatic gene	1795.94	797.833	685.516	648.434	706.839	402.015							forward	1.06	-0.25	-0.07	-0.265	-0.21	-1.36
A_09_P021546	Euchromatic gene	0.290027	28.6537	67.0974	75.7184	99.7391	160.768							forward	-4.425	-1.405	0.125	-0.245	0.205	1.115
A_09_P021551	Euchromatic gene	75.7299	114.555	231.94	214.493	117.703	13.8452							forward	1.52	1.585	2.79	2.355	1.61	-2.015
A_09_P021556	Euchromatic gene	50.181	178.193	574.789	422.477	345.424	5247.05							forward	-3.73	-2.43	-0.695	-1.27	-1.66	2.125
A_09_P021561	Euchromatic gene	6140.48	10620.7	8292.45	9177.22	8663.43	5625.24							forward	-0.23	0.07	-0.26	-0.195	-0.275	-1.04
A_09_P021566	Euchromatic gene	19189	17504.5	4781.8	1568.6	1007.21	12686.7							forward	1.27	0.345	-1.765	-3.485	-4.055	-0.72
A_09_P021571	Euchromatic gene	3289.57	2913.04	3401.31	4380.45	4377.4	2109.49							forward	-0.14	-0.635	-0.185	0.105	0.135	-0.98
A_09_P021576	Euchromatic gene	3666.05	6012.68	6567.03	7473.44	6700.27	1485.09							forward	0.215	0.58	0.8	0.665	0.545	-1.205
A_09_P021581	Euchromatic gene	1011.38	1670.3	1417.62	927.705	619.699	412.655							forward	0.885	1.3	1.355	0.73	0.11	-0.83
A_09_P021586	Euchromatic gene	3701.34	760.422	2731.04	5755.62	6767.67	321.187							forward	0.93	-1.185	0.155	0.905	1.15	-3.12
A_09_P021591	Euchromatic gene	4828.28	2321.53	1171.42	1926.47	1674.9	2408.03							forward	0.68	-0.77	-1.345	-1.03	-1.2	-0.59
A_09_P021596	Euchromatic gene	671.717	840.11	1060.86	1634.74	1309.76	356.757							forward	0.4	0.61	1.02	1.275	0.98	-1.21
A_09_P021601	Euchromatic gene	2480.68	4794.16	4850.31	4043.5	4410.01	1341.94							forward	-0.08	0.445	0.5	0.32	0.485	-1.235
A_09_P021606	Euchromatic gene	191.574	246.9	135.543	126.438	73.8277	108.476							forward	1.825	1.665	0.84	0.265	-0.775	-0.34
A_09_P021611	Euchromatic gene	1626.1	3810.51	4046.99	3079.26	2255.48	238.199							forward	0.19	0.97	1.285	0.815	0.385	-2.69
A_09_P021616	Euchromatic gene	1904.1	3327.17	1081.09	594.465	925.583	131.469							forward	1.02	1.56	0.235	-0.585	0.015	-3.24
A_09_P021621	Euchromatic gene	2.76128	7.988	4.76443	7.05359	11.8719	726.061							forward	-5.19	-5.62	-5.625	-5.955	-4.91	1.61
A_09_P021626	Euchromatic gene	20.3332	29.0014	50.233	157.954	462.059	823.64							forward	-2.52	-2.885	-1.9	-0.58	0.815	1.59
A_09_P021631	Euchromatic gene	605.356	1143.72	1376.81	940.546	544.415	264.938							forward	0.955	1.64	1.67	1.005	0.245	-0.915
A_09_P021636	Euchromatic gene	1772.95	2571.41	2072.68	1183.75	874.983	957.246							forward	0.08	0.545	0.335	-0.56	-1	-1.13
A_09_P021641	Euchromatic gene	1115.12	1814.78	735.488	547.839	446.861	250.357							forward	0.86	1.36	0.395	-0.28	-0.635	-1.69
A_09_P021646	Euchromatic gene	7.77544	4.50792	7.41987	6.76078	5.19243	4.5045							forward	-3	-3	-3	-3	-3	-3
A_09_P021651	Euchromatic gene	1711.85	225.788	543.254	1697.99	1781.55	2434.52							forward	0.38	-2.35	-1.27	0.125	0.175	0.425
A_09_P021656	Euchromatic gene	3240.03	3642.96	170.385	93.366	76.0065	56.8183							forward	1.335	1.1	-2.67	-3.635	-4	-4.92
A_09_P021661	Euchromatic gene	8.71197	7.71153	20.0606	143.73	1629.14	1303.4							forward	-5.96	-6.55	-5.63	-2.72	0.74	0.22
A_09_P021666	Euchromatic gene	1.54546	1.77542	0.510983	3.07697	5.31309	3.13017							forward	-3	-3	-3	-3	-3	-3
A_09_P021671	Euchromatic gene	0	0	0.657568	0.424625	0.990346	1.43778							forward	-3	-3	-3	-3	-3	-3
A_09_P021676	Euchromatic gene	1.14233	7.96609	6.86559	5.12741	0.999832	4.40681							forward	-3	-3	-3	-3	-3	-3
A_09_P021681	Euchromatic gene	2.41574	0	2.96059	4.47536	5.33349	5.2979							forward	-3	-3	-3	-3	-3	-3
A_09_P021686	Euchromatic gene	0.658371	2.94965	3.05711	0	4.35071	38.8623							forward	-3	-3	-3	-3	-3	2.9
A_09_P021691	Euchromatic gene	3.32973	1.06972	1.63429	4.00787	0	3.12976							forward	-3	-3	-3	-3	-3	-3
A_09_P021696	Euchromatic gene	54.9428	31.2472	30.7771	30.5918	26.9813	12.5593							forward	2.185	0.86	0.54	0.39	-0.25	-0.81
A_09_P021701	Euchromatic gene	13.9715	4.94986	15.0385	8.51057	6.97114	12.6912							forward	0.665	0.025	-0.085	-2.18	-1.255	-0.795
A_09_P021706	Euchromatic gene	7.03734	6.51866	7.02656	6.46604	7.71073	8212.37							forward	-4.005	-5.5	-5.22	-4.46	-5.49	5.73
A_09_P021711	Euchromatic gene	80.8782	105.665	107.494	132.778	468.955	193304							forward	-3.6	-3.555	-3.585	-3.425	-1.75	4.55
A_09_P021716	Euchromatic gene	55.9507	92.0137	81.2956	189.731	135.05	46911.4							forward	-3.595	-3.415	-3.75	-2.935	-3.24	4.455
A_09_P021721	Euchromatic gene	40.1652	99.3942	92.0398	104.241	94.0581	39898.4							forward	-3.855	-3.02	-3.295	-3.26	-3.485	4.355
A_09_P021726	Euchromatic gene	4.59817	44.5918	22.8396	12.6015	3.7842	23.184							forward	-2.135	1.105	0.71	-1.29	-2.945	0.26
A_09_P021731	Euchromatic gene	7.17545	9.98834	5.51174	7.36794	3.94595	304.319							forward	-4.425	-3.85	-5.12	-4.47	-5.29	1.59
A_09_P021736	Euchromatic gene	13.6201	11.2968	25.5363	148.468	395.236	1626.24							forward	-4.315	-4.825	-4.475	-1.975	-0.645	1.325
A_09_P021741	Euchromatic gene	6.03163	7.73358	6.2612	1.17553	5.0963	7.13552							forward	-3	-2.04	-1.895	-3	-3	-3
A_09_P021746	Euchromatic gene	1623.07	3157.94	4191	3885.25	2551.15	1116.94							forward	-0.215	0.625	1.055	0.74	0.14	-0.89
A_09_P021751	Euchromatic gene	24.8659	287.643	749.659	648.776	458.947	23.4637							forward	-1.045	1.955	3.395	2.7	2.05	-2.255
A_09_P021756	Euchromatic gene	3992.05	6160.16	5390.97	4857.11	4049	1890.54							forward	-0.04	0.245	-0.01	-0.16	-0.465	-1.425
A_09_P021761	Euchromatic gene	420.377	937.079	938.376	754.33	599.673	183.255							forward	0.32	1.075	1.135	0.765	0.38	-1.275
A_09_P021766	Euchromatic gene	18.6151	17.1805	36.5294	110.273	75.1733	5.94937							forward	0.19	-0.27	1.24	2.485	1.895	-2.15
A_09_P021771	Euchromatic gene	3510.84	6785.24	3396.06	2734.1	2993.29	1276.94							forward	0.17	0.79	-0.115	-0.365	-0.29	-1.505
A_09_P021776	Euchromatic gene	636.726	236.969	785.554	831.465	818.761	424.726							forward	0.535	-0.87	0.545	0.45	0.33	-0.69
A_09_P021781	Euchromatic gene	1.98003	5.76964	9.0068	39.3454	94.9425	658.479							forward	-7.02	-7.75	-7.025	-4.165	-2.785	-0.185
A_09_P021786	Euchromatic gene	1.54319	8.95469	5.76155	36.2732	86.845	3063.33							forward	-8.365	-8.3	-8.89	-5.135	-3.65	1.075
A_09_P021791	Euchromatic gene	1362.29	2020.94	4136.55	6832.44	7305.47	6231							forward	-0.81	-0.51	0.505	0.995	1.145	1.035
A_09_P021796	Euchromatic gene	58.672	78.8483	89.6161	81.6317	76.5348	365.351							forward	-3.805	-3.785	-3.64	-4.005	-4.165	-2.19
A_09_P021801	Euchromatic gene	3.07255	6.49501	3.10495	2.08997	2.0541	2.75706							forward	-3	-3	-3	-3	-3	-3
A_09_P021806	Euchromatic gene	1.74291	0.0886008	0	2.3193	3.20336	5.77736							forward	-3	-3	-3	-3	-3	-3
A_09_P021811	Euchromatic gene	10.5049	4.46868	4.4749	4.34788	4.85541	1166.42							forward	-1.315	-2.62	-2.975	-3.18	-2.835	5.345
A_09_P021816	Euchromatic gene	1889.57	4698.05	4613.58	5736.21	5786.73	5083.99							forward	-0.73	0.2	0.31	0.62	0.59	0.335
A_09_P021821	Euchromatic gene	2.79082	82.9887	113.078	54.1966	36.1344	8.95822							forward	-1.28	3.455	3.795	2.215	1.5	-0.935
A_09_P021826	Euchromatic gene	0	3.07912	1.58235	3.85746	2.48204	4.01614							forward	-3	-3	-3	-3	-3	-3
A_09_P021831	Euchromatic gene	62.7189	28.8471	37.6672	74.8793	61.0189	298.936							forward	-0.155	-1.74	-1.625	-1.275	-1.605	1.045
A_09_P021836	Euchromatic gene	3.50354	4.11489	4.96528	4.26968	1.36739	4.58137							forward	-3	-3	-3	-3	-3	-3
A_09_P021841	Euchromatic gene	4.47989	2.59054	5.62828	0.493415	0	1.76597							forward	-3	-3	-3	-3	-3	-3
A_09_P021846	Euchromatic gene	7.94273	4.83103	9.94227	7.72471	5.11475	4.48578							forward	-3	-3	-3	-3	-3	-3
A_09_P021851	Euchromatic gene	7.86861	3.22569	9.8345	4.59026	5.49613	5.15736							forward	-3	-3	-3	-3	-3	-3
A_09_P021856	Euchromatic gene	19.9598	16.2775	12.1659	9.08456	10.4821	12.887							forward	1.085	0.28	-0.285	-0.195	-0.335	0.025
A_09_P021861	Euchromatic gene	3.20658	3.74579	1.00993	1.35172	3.65568	71.1348							forward	-2.02	-2.48	-2.68	-2.74	-2.745	2.625
A_09_P021866	Euchromatic gene	1035.27	2095.72	2309.45	1752.74	1516.58	387.549							forward	0.14	0.985	1.195	0.755	0.565	-1.41
A_09_P021871	Euchromatic gene	3.21573	6.03915	3.71222	9.40721	14.8717	3088.37							forward	-5.51	-5.72	-6.03	-5.985	-4.895	4.13
A_09_P021876	Euchromatic gene	754.626	1655.08	2179.06	2414.65	2101.59	3253.05							forward	-0.515	0.37	1.05	0.995	0.77	1.4
A_09_P021881	Euchromatic gene	171.84	26.8308	9.45968	7.77498	7.78472	82.0441							forward	2.235	-1.63	-3.265	-3.945	-3.51	0.045
A_09_P021886	Euchromatic gene	1.58645	2.85339	0	1.88014	0.0892844	1.81647							forward	-3	-3	-3	-3	-3	-3
A_09_P021891	Euchromatic gene	3.61938	0.813417	0.871959	2.62881	2.22147	3.54204							forward	-3	-3	-3	-3	-3	-3
A_09_P021896	Euchromatic gene	106.873	21551.7	27894.2	2104.18	149.634	148.191							forward	-4.62	2.315	2.515	-0.86	-4.32	-4.94
A_09_P021901	Euchromatic gene	0.916446	86.1632	89.2012	58.3744	14.501	610.731							forward	-3.655	1.275	1.135	0.225	-2.41	3.92
A_09_P021911	Euchromatic gene	0.794233	3.89725	0.380374	2.89815	1.46648	28.8551							forward	-2.03	-1.69	-2.64	-2.79	-2.845	0.915
A_09_P021916	Euchromatic gene	650.562	463.372	214.241	382.443	401.689	130.542							forward	1.18	0.335	-0.495	0.025	0.1	-1.97
A_09_P021921	Euchromatic gene	1827.74	2228.6	716.407	551.981	772.096	268.57							forward	0.925	0.94	-0.285	-0.525	-0.04	-2.225
A_09_P021926	Euchromatic gene	602.046	981.58	505.915	614.134	616.683	295.173							forward	1.015	1.355	0.59	0.505	0.42	-0.71
A_09_P021931	Euchromatic gene	1937.66	516.783	347.702	530.123	652.495	1002.15							forward	1.055	-0.78	-1.14	-0.79	-0.525	-0.135
A_09_P021936	Euchromatic gene	229.578	464.748	391.489	280.44	120.784	132.14							forward	0.99	1.325	1.19	0.15	-1.295	-1.215
A_09_P021941	Euchromatic gene	81.4287	297.126	945.636	1014.99	728.881	269.784							forward	-0.195	0.895	2.565	2.25	1.805	0.315
A_09_P021946	Euchromatic gene	2767.97	4730.67	2959.96	2174.06	2134.49	909.664							forward	0.55	1.005	0.555	0.165	0.08	-1.32
A_09_P021951	Euchromatic gene	1795.34	3658.41	4803.56	5684.3	4764.9	468.362							forward	-0.425	0.26	0.855	0.72	0.595	-2.475
A_09_P021956	Euchromatic gene	1507.72	1806.99	3764.92	5132.28	4704.07	749.485							forward	-0.275	-0.3	0.925	1.295	1.165	-1.495
A_09_P021961	Euchromatic gene	673.679	112.401	17.8211	15.3456	8.61837	13.2887							forward	2.345	-0.91	-3.265	-4.17	-5.185	-4.815
A_09_P021966	Euchromatic gene	8.08287	7.57705	2.46607	1.28821	0.790869	13.6305							forward	-3	-3	-3	-3	-3	-3
A_09_P021971	Euchromatic gene	568.756	1593.72	2064.28	2088.71	1828.18	70.5662							forward	0.08	1.135	1.675	1.81	1.55	-3.82
A_09_P021976	Euchromatic gene	184.475	464.705	795.121	1147.1	1040.6	108.818							forward	0.575	1.135	2.035	2.245	2.13	-1.47
A_09_P021981	Euchromatic gene	38.5022	26.0284	29.6943	28.1684	21.6226	11.9815							forward	1.44	0.615	0.785	0.14	0.305	-1.205
A_09_P021986	Euchromatic gene	0	5.75636	5.66905	3.75784	3.94992	1.88275							forward	-3	-3	-3	-3	-3	-3
A_09_P021991	Euchromatic gene	433.77	182.102	582.371	651.612	783.589	442.837							forward	0.16	-1.4	0.24	0.085	0.385	-0.6
A_09_P021996	Euchromatic gene	6.7662	21.5388	13.3293	8.28025	38.5421	26.2483							forward	-0.685	0.73	-0.795	-0.74	0.76	0.56
A_09_P022001	Euchromatic gene	890.157	1690.07	379.724	263.238	342.316	297.715							forward	0.92	1.525	-0.18	-1.035	-0.725	-1.025
A_09_P022006	Euchromatic gene	5.01011	2.50559	5.91273	0.729747	3.52719	5.20873							forward	-3	-3	-3	-3	-3	-3
A_09_P022011	Euchromatic gene	1.43546	3.88391	0.425128	0.241829	0	2.0381							forward	-3	-3	-3	-3	-3	-3
A_09_P022016	Euchromatic gene	0	1.29299	1.68765	0	6.2767	1.81144							forward	-3	-3	-3	-3	-3	-3
A_09_P022021	Euchromatic gene	5.84628	1.71189	0.2828	6.28335	2.765	2.87372							forward	-3	-3	-3	-3	-3	-3
A_09_P022031	Euchromatic gene	0	0.157626	1.11212	1.67375	0	0							forward	-3	-3	-3	-3	-3	-3
A_09_P022036	Euchromatic gene	0.759355	3.85214	4.64241	6.21786	6.67404	5.16961							forward	-3	-3	-3	-3	-3	-3
A_09_P022041	Euchromatic gene	0.342247	0.556584	1.55948	1.3769	3.14043	1.56572							forward	-3	-3	-3	-3	-3	-3
A_09_P022046	Euchromatic gene	0.490636	1.38274	0	0	2.31266	0							forward	-3	-3	-3	-3	-3	-3
A_09_P022051	Euchromatic gene	70.6026	96.0664	75.1799	88.5131	76.5961	9075.66							forward	-3.465	-3.445	-4.005	-3.855	-4.165	2.295
A_09_P022056	Euchromatic gene	1650.6	135.857	56.156	25.4081	16.9776	9.7217							forward	2.425	-1.135	-2.56	-4.58	-5.25	-6.805
A_09_P022061	Euchromatic gene	28.6661	126.119	271.475	391.683	353.391	41.2882							forward	-0.82	1.01	2.255	2.28	1.93	-1.25
A_09_P022066	Euchromatic gene	0.332225	5.62645	6.15892	6.20908	0	1.57379							forward	-3	-3	-3	-3	-3	-3
A_09_P022071	Euchromatic gene	25.8571	2712.7	4062.1	1223.87	956.229	92.6067							forward	-3.06	2.68	2.955	1.49	1.08	-3.035
A_09_P022076	Euchromatic gene	1033.45	2098.12	2148.82	1940.27	1729.75	919.066							forward	-0.37	0.43	0.625	0.555	0.35	-0.745
A_09_P022081	Euchromatic gene	0.920711	4.02181	1.46242	7.54314	7.31016	1017.39							forward	-4.835	-5.01	-5.075	-5.04	-4.87	3.375
A_09_P022086	Euchromatic gene	9.34067	5.56063	7.22032	5.54509	4.98934	153.897							forward	-3.26	-4.075	-4.045	-4.715	-4.855	0.36
A_09_P022091	Euchromatic gene	480.61	1153.96	983.069	782.381	422.05	61.8444							forward	0.66	1.48	1.43	0.83	0.01	-3.2
A_09_P022096	Euchromatic gene	5.98296	7.71259	6.01449	6.76157	6.5163	16.9708							forward	-3	-3	-3	-3	-3	1.615
A_09_P022101	Euchromatic gene	0.0594136	0	5.30449	4.53362	2.03665	15.8925							forward	-3	-3	-3	-3	-3	-3
A_09_P022106	Euchromatic gene	0	3.73129	2.34485	4.02733	2.46633	1.1935							forward	-3	-3	-3	-3	-3	-3
A_09_P022111	Euchromatic gene	1.20944	8.05175	3.16612	17.8017	16.1918	18.2391							forward	-4.475	-4.78	-5.54	-3.98	-2.96	-2.64
A_09_P022116	Euchromatic gene	1924.7	4184.57	5258.09	4906.03	3762.02	1343.85							forward	-0.43	0.415	1.02	0.845	0.535	-0.92
A_09_P022121	Euchromatic gene	829.787	1701.57	2031.81	1431.42	973.7	36.5332							forward	0.905	1.815	1.8	1.405	0.87	-4.625
A_09_P022126	Euchromatic gene	2893.42	518.039	1917.23	3424.82	4857.41	1042.07							forward	0.62	-1.595	-0.26	0.725	1.155	-1.21
A_09_P022136	Euchromatic gene	5487.53	585.347	2665.04	4049.1	4300.92	4901.29							forward	0.41	-3.085	-1.05	-0.53	-0.54	-0.295
A_09_P022141	Euchromatic gene	660.952	194.145	322.602	771.157	1273.2	696.519							forward	-1.01	-2.52	-1.875	-1.09	-0.36	-1.145
A_09_P022146	Euchromatic gene	346.534	345.526	506.744	551.681	502.933	144.288							forward	0.885	0.35	1.17	0.98	0.7	-1.26
A_09_P022151	Euchromatic gene	5576.1	2988.27	1116.6	1417.14	1684.94	2073.2							forward	0.755	-0.64	-1.7	-1.51	-1.27	-1.175
A_09_P022156	Euchromatic gene	4022.62	5541.34	6256.41	7956.6	8085.41	5305.92							forward	-0.325	-0.27	-0.08	0.145	0.235	-0.325
A_09_P022161	Euchromatic gene	48.1403	76.8671	137.482	140.695	57.8588	104.567							forward	-2.515	-2.775	-1.66	-1.77	-3.27	-3.06
A_09_P022166	Euchromatic gene	21985.8	1147.12	307.164	200.46	116.374	15642							forward	2.105	-3.7	-5.045	-5.75	-6.545	-0.105
A_09_P022171	Euchromatic gene	283.533	212.863	516.945	363.917	280.012	33.4968							forward	2.085	1.25	2.51	1.715	1.22	-2.525
A_09_P022176	Euchromatic gene	41.6986	47.8716	15.7626	29.1259	23.1013	467.644							forward	-1.035	-1.48	-3.12	-2.82	-3.325	1.37
A_09_P022181	Euchromatic gene	4585.36	9721.81	11484.6	12445.6	11354.4	11230.5							forward	-0.565	-0.105	0.23	0.25	0.21	0.14
A_09_P022186	Euchromatic gene	25.7825	78.0619	227.504	379.586	405.296	110.854							forward	-0.945	0.59	1.895	2.335	2.105	0.43
A_09_P022191	Euchromatic gene	26.0094	57.8121	187.981	283.714	429.179	317.739							forward	-3.965	-3.375	-1.81	-1.335	-0.925	-1.625
A_09_P022196	Euchromatic gene	2.96819	3.31903	6.47956	10.1893	7.57311	11.7199							forward	-1.55	-2.355	-1.585	-1.23	-1.825	0.165
A_09_P022206	Euchromatic gene	2316.52	4915.55	5119.15	4402.85	4727.41	4285.83							forward	-0.055	0.645	0.735	0.415	0.54	0.485
A_09_P022211	Euchromatic gene	662.13	1588.53	1749.43	1496.69	1453.64	205.707							forward	0.11	0.99	1.385	0.975	0.885	-2.01
A_09_P022216	Euchromatic gene	2.19722	2.57859	1.72959	0.945528	3.05877	787.171							forward	-2.62	-3.62	-2.9	-3.405	-3.835	4.36
A_09_P022221	Euchromatic gene	14.4129	16.6923	12.5866	22.3	20.1971	496.822							forward	-2.635	-2.77	-2.825	-3.035	-3.235	1.795
A_09_P022226	Euchromatic gene	11.3146	15.7418	10.7207	22.5451	13.5983	15.9867							forward	-1.695	-2.54	-3.445	-2.73	-3.265	-2.91
A_09_P022231	Euchromatic gene	1.85138	3.29333	1.51884	2.46083	6.5135	7.14919							forward	-3	-3	-3	-3	-3	-3
A_09_P022236	Euchromatic gene	0	1.22938	3.72016	4.6148	2.16895	12.6851							forward	-3	-3	-3	-3	-3	-3
A_09_P022241	Euchromatic gene	2.36933	4.68131	2.31763	1.3536	3.16246	4.70576							forward	-3	-3	-3	-3	-3	-3
A_09_P022246	Euchromatic gene	1391.01	2355.85	2016.09	1727.6	1474.69	973.768							forward	0.035	0.675	0.58	0.245	0.02	-0.62
A_09_P022251	Euchromatic gene	1831.09	3640.66	3552.39	4118.71	3910.16	812.706							forward	-0.62	0.02	0.24	0.445	0.35	-1.88
A_09_P022256	Euchromatic gene	35.6466	52.8076	48.3979	44.6611	38.3225	10372.7							forward	-3.47	-3.505	-3.785	-4.06	-4.26	3.28
A_09_P022261	Euchromatic gene	3.87249	2.9294	1.58569	7.78644	12.6827	7.88269							forward	-3	-3	-3	-3	-3	0.14
A_09_P022266	Euchromatic gene	2.03363	35.9878	96.8763	114.955	69.693	94.554							forward	-3.88	-1.565	0.39	0.36	-0.765	-0.18
A_09_P022271	Euchromatic gene	1023.3	2320.41	1313.26	796.581	814.534	632.133							forward	-0.14	0.705	0.295	-0.285	-0.29	-0.865
A_09_P022276	Euchromatic gene	1312.95	378.941	730.248	2014.82	2686.31	5143.72							forward	-0.2	-1.775	-0.96	0.135	0.48	1.485
A_09_P022281	Euchromatic gene	18.8485	13.2591	9.30094	16.209	20.0215	23.9606							forward	0.08	-1.43	-0.81	-0.85	-0.61	0.08
A_09_P022286	Euchromatic gene	3.79668	7.92973	10.4715	197.74	373.196	1305.74							forward	-5.885	-6.535	-5.435	-0.645	0.085	1.795
A_09_P022291	Euchromatic gene	1.73522	4.99307	0	1.88899	2.6286	7.26733							forward	-3	-3	-3	-3	-3	-3
A_09_P022296	Euchromatic gene	51.8049	84.4043	74.8828	84.9552	85.4076	4805.03							forward	-3.085	-3.065	-3.155	-3.135	-3.23	2.275
A_09_P022301	Euchromatic gene	5.8507	4.46918	5.38192	3.4557	8.80893	51.8499							forward	-4.55	-5.265	-4.995	-4.915	-5.275	-1.015
A_09_P022306	Euchromatic gene	14.0283	12.9816	9.61546	6.08827	10.1123	101.631							forward	-1.48	-2.715	-2.455	-4.08	-3.48	1.14
A_09_P022311	Euchromatic gene	2.91381	34.4104	17.4983	27.2971	124.639	4.01284							forward	-1.89	1.34	0.58	0.635	3.1	-1.98
A_09_P022316	Euchromatic gene	1.24203	2.23201	2.38406	2.87921	2.21226	45.5347							forward	-3	-3	-3	-3	-3	3.27
A_09_P022321	Euchromatic gene	5507.54	3598.75	2496.99	3416.89	3497.61	3570.41							forward	0.34	-0.94	-1.015	-0.79	-0.77	-0.605
A_09_P022326	Euchromatic gene	1823.05	454.295	1104.45	1041.45	844.406	311.012							forward	1.36	-0.44	0.73	0.695	0.395	-1.57
A_09_P022331	Euchromatic gene	977.458	1124.72	470.624	577.827	743.323	212.459							forward	1.08	0.975	0.03	0.02	0.285	-1.68
A_09_P022336	Euchromatic gene	46.1799	59.3275	13.6745	16.7266	13.1199	296.378							forward	-0.82	-1.335	-3.105	-3.62	-4.53	0.88
A_09_P022341	Euchromatic gene	3.47919	4.93067	3.773	2.73246	3.92367	4.40033							forward	-3	-3	-3	-3	-3	-3
A_09_P022346	Euchromatic gene	830.451	289.078	27.227	15.8639	44.1236	397.533							forward	1.91	0.065	-3.305	-4.355	-2.99	0.105
A_09_P022351	Euchromatic gene	1222.28	184.861	186.712	440.939	400.683	78.872							forward	1.855	-0.875	-0.745	0.17	-0.01	-2.965
A_09_P022356	Euchromatic gene	2412.37	334.897	1507	1782.12	1591.79	1204.79							forward	0.875	-1.83	0.53	0.445	0.2	-0.095
A_09_P022361	Euchromatic gene	194.975	324.989	388.164	597.182	549.716	11.184							forward	1.425	1.42	1.795	2.19	1.905	-4.075
A_09_P022366	Euchromatic gene	17600.5	563.166	367.433	385.548	451.069	6401.64							forward	1.94	-3.665	-4.02	-3.995	-3.845	-0.525
A_09_P022371	Euchromatic gene	1278.14	2483.99	3997.13	5771.65	6681.36	276.569							forward	-0.73	0.2	0.735	1.01	1.2	-3.125
A_09_P022376	Euchromatic gene	2652.75	3837.43	2597.7	2061.91	2053.25	741.924							forward	0.58	0.815	0.48	0.125	0.07	-1.585
A_09_P022381	Euchromatic gene	4501	5672.41	3491.28	2941.43	2852.03	10545							forward	0.265	0.165	-0.46	-0.745	-0.795	0.99
A_09_P022386	Euchromatic gene	4.21961	1.87529	2.13538	2.51527	1.81697	0.625558							forward	-3	-3	-3	-3	-3	-3
A_09_P022391	Euchromatic gene	0	0	1.91529	1.84733	2.40369	4.71619							forward	-3	-3	-3	-3	-3	-3
A_09_P022396	Euchromatic gene	2.02897	3.22498	0.0217458	0.05074	4.26935	4.3348							forward	-3	-3	-3	-3	-3	-3
A_09_P022401	Euchromatic gene	2530.44	925.565	719.754	1463.01	2082.4	1057.23							forward	0.48	-0.88	-1.18	-0.315	0.13	-0.88
A_09_P022406	Euchromatic gene	3393.57	4510.31	1821.11	1712.37	2455.55	1550.01							forward	0.175	0.13	-1.07	-1.12	-0.69	-1.5
A_09_P022411	Euchromatic gene	3.3929	0.293262	4.47964	17.0727	39.9324	4552.6							forward	-7.93	-8.71	-9.115	-6.605	-4.555	2.185
A_09_P022416	Euchromatic gene	2.49048	1.98388	0.370235	5.88057	5.33905	54.3831							forward	-4.315	-5.695	-5.945	-5.4	-5.96	-0.895
A_09_P022421	Euchromatic gene	0	0	1.00243	0.357601	0	1.3514							forward	-3	-3	-3	-3	-3	-3
A_09_P022426	Euchromatic gene	3.36801	5.84372	0	5.39628	7.88081	10.6661							forward	-3.13	-3.935	-4.355	-3.57	-3.28	-1.645
A_09_P022431	Euchromatic gene	0.677545	1.8951	2.84565	7.5038	16.2848	1.00508							forward	-3	-3	-3	-3	2.57	-3
A_09_P022436	Euchromatic gene	3371.45	2527.48	163.209	251.385	356.395	346.005							forward	1.03	0.295	-3.115	-2.64	-2.15	-2.555
A_09_P022441	Euchromatic gene	2411.86	5329.1	5286.3	3855.56	4292.43	1504.35							forward	-0.14	0.63	0.69	0.065	0.26	-1.09
A_09_P022446	Euchromatic gene	2388.99	3634.49	3068.9	2728.86	2151.25	528.794							forward	0.465	0.885	0.715	0.47	0.11	-1.865
A_09_P022451	Euchromatic gene	601.352	1165.24	824.101	1224.16	964.144	555.838							forward	0.18	0.825	0.655	0.835	0.485	-0.33
A_09_P022456	Euchromatic gene	5.74521	27.5397	101.594	87.4275	57.8129	8.25078							forward	-3	1.995	3.13	3.05	2.035	-0.44
A_09_P022461	Euchromatic gene	2325.82	3985.84	3974.76	3971.74	5096.95	2323.58							forward	-0.595	-0.075	-0.03	-0.165	0.165	-0.845
A_09_P022466	Euchromatic gene	123.879	47.5491	96.6649	240.286	239.493	41.1944							forward	1.355	-0.98	0.335	1.355	1.29	-1.31
A_09_P022471	Euchromatic gene	1056.01	617.333	101.317	300.079	523.6	388.314							forward	0.78	-0.09	-2.465	-0.965	-0.175	-0.995
A_09_P022476	Euchromatic gene	4235.71	6020.47	1832.4	3613.34	4405.07	5806.01							forward	0.185	0.16	-1.09	-0.335	-0.05	0.365
A_09_P022481	Euchromatic gene	7.35236	7.67438	14.8525	15.7062	31.2903	2.3584							forward	-3	-3	-3	-3	3.685	-3
A_09_P022486	Euchromatic gene	1.79387	3.49886	0	2.8306	8.01096	28.3147							forward	-3	-3	-3	-3	-3	2.885
A_09_P022491	Euchromatic gene	843.392	527.265	117.746	130.993	142.056	117.022							forward	1.345	0.405	-1.275	-1.545	-1.45	-2.185
A_09_P022496	Euchromatic gene	1647.58	1581.19	1463.39	1672.54	1285.73	606.355							forward	0.545	0.44	0.45	0.395	0.045	-1.045
A_09_P022501	Euchromatic gene	1346.88	1865.6	2586.62	3264.88	2750.05	1638.4							forward	-0.095	0.26	0.81	1.005	0.82	-0.005
A_09_P022506	Euchromatic gene	2959.46	6165.5	6715.36	5974.93	4631.65	678.399							forward	-0.005	0.66	0.77	0.645	0.345	-2.485
A_09_P022511	Euchromatic gene	31.3977	629.334	445.343	497.631	660.43	16.8564							forward	-1.565	1.72	1.705	1.435	1.685	-3.855
A_09_P022516	Euchromatic gene	12.0955	93.996	16.9304	31.4752	57.6296	1.84206							forward	-0.37	2.705	0.225	0.09	1.155	-3.865
A_09_P022521	Euchromatic gene	22.5614	127.774	58.4882	34.0157	38.3728	9.05354							forward	0.8	3.475	2.39	0.82	0.79	-0.76
A_09_P022526	Euchromatic gene	0.00486796	0	0.193592	2.07341	2.85	3.67969							forward	-3	-3	-3	-3	-3	-3
A_09_P022531	Euchromatic gene	23.9678	3856.8	5242.79	850.168	1207.95	7.57486							forward	-3.305	3.09	3.585	1.175	1.54	-7.38
A_09_P022536	Euchromatic gene	23.4726	15.4865	18.1092	17.9357	15.847	20.9736							forward	0.075	-3	2.58	2.505	-3	2.08
A_09_P022541	Euchromatic gene	1.14439	15.7525	10.7214	12.3569	12.5886	75.0787							forward	-4.37	-2.95	-2.725	-3.11	-3.085	0.255
A_09_P022546	Euchromatic gene	2.26482	5.36627	10.7126	20.6017	26.8254	2329.31							forward	-6.225	-7	-4.41	-4.185	-4.33	2.79
A_09_P022551	Euchromatic gene	18.1722	5.72442	5.04818	4.47193	4.11577	41.3188							forward	0.735	-1.935	-1.275	-2.07	-1.825	1.55
A_09_P022556	Euchromatic gene	504.583	187.115	596.38	731.074	652.996	311.99							forward	0.835	-0.82	0.855	0.99	0.65	-0.61
A_09_P022561	Euchromatic gene	6.08553	5.74518	5.43741	5.75111	1.52978	5.37416							forward	-3	-3	-3	-3	-3	-3
A_09_P022566	Euchromatic gene	0	2.19239	0	9.35186	0	1.26638							forward	-3	-3	-3	-3	-3	-3
A_09_P022571	Euchromatic gene	0	1.00362	0.953474	7.4032	1.21373	2.65427							forward	-3	-3	-3	-3	-3	-3
A_09_P022576	Euchromatic gene	2.38094	4.15704	0.539366	0	1.32835	0							forward	-3	-3	-3	-3	-3	-3
A_09_P022581	Euchromatic gene	6.66339	4.3125	3.93112	3.86433	7.41158	21.387							forward	-1.875	-2.52	-2.845	-2.285	-2.49	-0.03
A_09_P022586	Euchromatic gene	1.06731	0.508631	1.25276	1.09148	3.41433	0.348019							forward	-3	-3	-3	-3	-3	-3
A_09_P022591	Euchromatic gene	3144.72	5635.95	7481.42	8783.12	8834.22	5282.65							forward	-0.51	-0.16	0.285	0.51	0.54	-0.335
A_09_P022596	Euchromatic gene	8001.61	13255.9	13008.5	12443	10831.7	30669.8							forward	-0.15	-0.07	-0.06	-0.125	-0.395	0.71
A_09_P022601	Euchromatic gene	1029	310.878	535.981	1058.99	1385.71	1693.11							forward	0.69	-0.95	-0.305	0.44	0.695	0.88
A_09_P022606	Euchromatic gene	1458.34	875.99	162.424	296.564	491.489	698.215							forward	0.865	-0.015	-1.985	-1.23	-0.54	-0.525
A_09_P022611	Euchromatic gene	1479.56	3045.59	3081.32	2919.74	2654.99	293.121							forward	-0.16	0.535	0.82	0.62	0.505	-2.745
A_09_P022616	Euchromatic gene	1849.4	3362.13	2871.95	1596.06	1459.66	1429.7							forward	-0.03	0.565	0.375	-0.365	-0.55	-0.625
A_09_P022621	Euchromatic gene	1024.04	1493.7	1954.85	2526.4	1994.12	499.277							forward	0.165	0.69	0.73	0.875	0.705	-1.4
A_09_P022626	Euchromatic gene	541.711	995.844	701.825	876.132	840.094	189.943							forward	0.435	0.865	0.665	0.865	0.75	-1.53
A_09_P022631	Euchromatic gene	21138.6	32045.7	39060.9	39350.7	44821.9	79385.6							forward	-0.19	-0.285	-0.35	-0.34	-0.285	-0.05
A_09_P022636	Euchromatic gene	168.664	230.797	211.903	162.852	111.774	1.19736							forward	2.21	2.265	2.38	1.765	1.105	-5.545
A_09_P022641	Euchromatic gene	11.6999	14.9616	87.7406	345.683	360.185	6.1175							forward	-1.525	-2.15	1.065	2.62	2.625	-3.81
A_09_P022646	Euchromatic gene	188.373	294.836	65.4137	103.48	156.762	11.6519							forward	1.72	1.31	-0.31	-0.005	0.48	-4.05
A_09_P022651	Euchromatic gene	2.40275	1.52894	0.0823611	2.80262	1.78338	0							forward	-3	-3	-3	-3	-3	-3
A_09_P022656	Euchromatic gene	2.60674	2.07003	5.76205	5.60605	7.11339	5.13531							forward	-3	-3	-3	-3	-3	-3
A_09_P022661	Euchromatic gene	668.259	948.591	892.599	818.725	733.505	423.275							forward	0.07	0.415	0.34	0.06	-0.22	-1.125
A_09_P022666	Euchromatic gene	0.457411	0.691734	0	3.1216	2.218	8.97185							forward	-3	-3	-3	-3	-3	-3
A_09_P022671	Euchromatic gene	0	2.59212	0	0	3.77858	6.36462							forward	-3	-3	-3	-3	-3	-3
A_09_P022681	Euchromatic gene	20.0518	15.4878	14.4915	13.7395	24.024	12.9975							forward	1.435	0.38	0.505	-0.12	-0.12	0.205
A_09_P022686	Euchromatic gene	15.8288	16.4142	45.5017	100.012	115.283	11.2428							forward	-0.98	-1.765	0.38	1.035	1.175	-2.275
A_09_P022691	Euchromatic gene	5.37976	45.144	70.5733	58.6419	60.2713	4.03077							forward	-1.995	1.86	2.58	1.69	1.825	-2.255
A_09_P022696	Euchromatic gene	3.03846	1.2045	8.54601	66.9757	65.5267	11.8944							forward	-2.365	-3.13	-1.035	1.94	1.975	-0.35
A_09_P022701	Euchromatic gene	61.2128	95.7535	85.7799	104.841	92.3703	5349.37							forward	-2.07	-1.985	-2.125	-2.205	-2.375	2.47
A_09_P022706	Euchromatic gene	19.9453	25.2991	38.6689	91.5647	127.444	46.0825							forward	-0.25	-0.4	0.335	1.66	2.075	0.075
A_09_P022711	Euchromatic gene	0	4.45137	0	4.88065	1.14617	5.28419							forward	-3	-3	-3	-3	-3	-3
A_09_P022716	Euchromatic gene	4.29113	3.85109	2.19224	2.37925	0	7.14472							forward	-3	-3	-3	-3	-3	-3
A_09_P022721	Euchromatic gene	5.38048	5.20696	5.21026	0.86954	3.04043	3.20259							forward	-3	-3	-3	-3	-3	-3
A_09_P022726	Euchromatic gene	0	1.43547	0.969501	1.72519	1.33007	2.21472							forward	-3	-3	-3	-3	-3	-3
A_09_P022731	Euchromatic gene	3.20792	3.37521	2.47822	5.64843	2.36801	20.7064							forward	-3	-3	-3	-3	-3	1.185
A_09_P022736	Euchromatic gene	2.83295	0	1.01841	6.1468	0.62875	0.925612							forward	-3	-3	-3	-3	-3	-3
A_09_P022741	Euchromatic gene	2.92987	2.55725	2.12922	1.204	0	0							forward	-3	-3	-3	-3	-3	-3
A_09_P022746	Euchromatic gene	13.5048	18.8007	29.8125	24.9815	33.777	25.2703							forward	-0.02	0.775	1.16	0.53	1.075	0.43
A_09_P022751	Euchromatic gene	3.51837	2.90937	0	1.55525	1.24371	0.434893							forward	-3	-3	-3	-3	-3	-3
A_09_P022756	Euchromatic gene	2622.86	4695.07	6343.71	4230.13	3353.92	3391.13							forward	-0.035	0.5	0.8	0.71	0.36	0.025
A_09_P022761	Euchromatic gene	622.761	936.496	73.0877	89.8069	83.4602	1628.58							forward	0.16	0.51	-2.715	-2.615	-2.73	1.395
A_09_P022766	Euchromatic gene	0	5.37473	2.79304	5.94443	0.341303	8.96746							forward	-3	-3	-3	-3	-3	-3
A_09_P022771	Euchromatic gene	27.1915	7.70357	6.77081	4.06781	7.88215	8.87086							forward	2.425	-3	-3	-3	-3	-3
A_09_P022776	Euchromatic gene	0.624116	5.88013	0.799342	4.03561	4.79735	4.2184							forward	-3	-3	-3	-3	-3	-3
A_09_P022781	Euchromatic gene	3.93574	3.29391	3.44189	0	4.04049	2.1588							forward	-3	-3	-3	-3	-3	-3
A_09_P022786	Euchromatic gene	811.885	631.041	340.296	372.957	273.963	1016.52							forward	0.77	0.33	-0.41	-0.55	-0.96	0.805
A_09_P022791	Euchromatic gene	10242.2	17558.3	17830.7	12262.5	7480.57	2624.44							forward	0.29	0.59	0.49	-0.13	-0.915	-2.5
A_09_P022796	Euchromatic gene	2161.75	3578.46	3786.16	2959.74	2794.37	1915.18							forward	-0.24	0.315	0.325	0.085	-0.055	-0.73
A_09_P022801	Euchromatic gene	60.0373	33.0883	48.3808	63.1294	79.0684	41.6037							forward	-2.18	-4.04	-3.54	-3.205	-2.975	-4.705
A_09_P022806	Euchromatic gene	6796.7	1871.21	3113.78	4783.1	6781.91	945.884							forward	0.39	-2.145	-1.34	-0.495	-0.07	-3.285
A_09_P022811	Euchromatic gene	2200.73	3903.06	6504.95	6105.43	5354.28	2199.36							forward	-0.665	0.115	0.615	0.695	0.465	-1.005
A_09_P022816	Euchromatic gene	42.0179	56.7768	25.4065	34.3997	30.1317	12.5952							forward	0.69	0.25	-0.49	-0.225	-0.665	-1.835
A_09_P022821	Euchromatic gene	5.50254	7.29974	4.29656	7.6571	8.02662	1454.04							forward	-5.865	-7.02	-8.125	-6.35	-6.825	1.76
A_09_P022826	Euchromatic gene	7.88596	7.92246	2.12899	15.0891	19.4458	21.6194							forward	-1.7	-1.915	-2.245	-0.18	-0.06	0.625
A_09_P022831	Euchromatic gene	37.1508	23.4359	7.74776	33.5913	38.7984	347.059							forward	-1.165	-2.955	-5.155	-2.77	-2.35	1.25
A_09_P022836	Euchromatic gene	3.12883	1.95278	1.34595	4.19233	4.35781	2.08625							forward	-2.23	-3.54	-3.55	-2.86	-3.295	-3.795
A_09_P022841	Euchromatic gene	0	7.24832	3.55215	12.0169	12.001	4.54062							forward	-3.1	-3.4	-2.665	-2.21	-2.46	-2.735
A_09_P022846	Euchromatic gene	2.29521	2.0047	3.89261	7.68535	4.42787	6.59352							forward	-3	-3	-3	-3	-3	-3
A_09_P022851	Euchromatic gene	22.1378	35.4284	28.7008	42.8918	64.5179	3533.99							forward	-4.775	-4.755	-5.08	-4.53	-3.89	1.57
A_09_P022856	Euchromatic gene	3.88961	3.10506	3.47315	5.9944	5.53354	102.665							forward	-1.895	-2.215	-3	-1.485	-2.07	2.945
A_09_P022861	Euchromatic gene	22.2649	27.0622	96.7939	99.9013	110.45	584.968							forward	-1.89	-2.885	-0.42	-0.685	-0.77	1.97
A_09_P022866	Euchromatic gene	25.6525	26.0814	50.4732	141.671	158.891	11.5679							forward	-0.02	-0.45	0.685	1.74	1.905	-1.76
A_09_P022871	Euchromatic gene	3520.49	3461.09	1354.94	1781.2	2773.89	2315.56							forward	0.71	0.365	-0.885	-0.585	-0.07	-0.38
A_09_P022876	Euchromatic gene	42.3198	20.5903	31.3601	28.446	25.6419	16.486							forward	1.33	0.14	0.4	0.18	0.12	-1.04
A_09_P022881	Euchromatic gene	605.963	1084.38	805.801	1058.95	985.283	817.866							forward	-0.085	0.38	0.41	0.705	0.57	0
A_09_P022886	Euchromatic gene	0	4.45317	0	0	2.22706	1.96783							forward	-3	-3	-3	-3	-3	-3
A_09_P022891	Euchromatic gene	0.701462	0.297957	0.702866	2.77098	0.556711	1.12896							forward	-3	-3	-3	-3	-3	-3
A_09_P022896	Euchromatic gene	0	0.558784	0	0	0	0							forward	-3	-3	-3	-3	-3	-3
A_09_P022901	Euchromatic gene	6.33548	5.55917	8.19277	1.83719	3.27355	13.1783							forward	-3	-3	-3	-3	-3	-3
A_09_P022906	Euchromatic gene	30.2197	98.181	1461.02	2385.85	1274.63	954.315							forward	-3.595	-2.44	1.045	1.475	0.635	0.25
A_09_P022911	Euchromatic gene	2.5857	7.22508	6.31408	9.25298	7.92558	116.381							forward	-3	-0.24	-3	-3	-0.795	4.185
A_09_P022916	Euchromatic gene	0	1.92294	1.59701	3.62628	0.671855	0							forward	-3	-3	-3	-3	-3	-3
A_09_P022921	Euchromatic gene	1207.25	848.783	3578.35	3733.34	3907.34	726.492							forward	-0.23	-0.715	1.115	1.23	1.25	-1.245
A_09_P022926	Euchromatic gene	1410.21	3054.35	4296.13	5364.36	4771.33	436.117							forward	-0.19	0.62	1.215	1.25	1.095	-1.98
A_09_P022931	Euchromatic gene	5327.25	10248.6	12877.8	11652.1	8682.95	878.43							forward	0.17	0.54	1.08	0.805	0.345	-2.785
A_09_P022936	Euchromatic gene	0	3.48536	0	0	1.60966	2.21358							forward	-3	-3	-3	-3	-3	-3
A_09_P022941	Euchromatic gene	27.0026	8.01123	7.9898	9.61481	7.58032	52.1083							forward	0.265	-1.59	-1.525	-2.47	-2.495	1.37
A_09_P022946	Euchromatic gene	5.44785	1.29752	0.249741	3.18637	6.23197	1.61359							forward	-3	-3	-3	-3	-3	-3
A_09_P022951	Euchromatic gene	2.85005	3.33288	5.47941	0.203958	0.219526	19.8721							forward	-3	-2.14	-2.215	-2.21	-1.935	1.075
A_09_P022956	Euchromatic gene	2709.94	5234.21	5346.35	5337.01	3909.45	2231.61							forward	-0.425	0.12	0.45	0.315	-0.07	-0.755
A_09_P022961	Euchromatic gene	734.094	1102.11	1168.2	1016.96	870.451	645.661							forward	0.16	0.54	0.69	0.33	0.065	-0.135
A_09_P022966	Euchromatic gene	1362.46	2179.98	1833.31	2353.99	2287.41	314.576							forward	-0.175	0.33	0.22	0.35	0.37	-2.415
A_09_P022971	Euchromatic gene	2376.7	2756.62	1520.45	1304.8	1116.8	816.144							forward	0.21	0.225	-0.025	-0.435	-0.68	-0.985
A_09_P022976	Euchromatic gene	220.911	249.656	124.639	110.979	60.6765	3.32093							forward	2.715	2.245	1.7	1.185	0.01	-4.9
A_09_P022981	Euchromatic gene	6702.81	3755.1	3567.58	3736.29	3050.81	4136.77							forward	0.52	-1.025	-0.78	-0.79	-1.005	-0.715
A_09_P022986	Euchromatic gene	5.22765	5.34015	3.52844	8.46705	10.8638	9.07202							forward	-3	-3	-3	-3	-3	-3
A_09_P022991	Euchromatic gene	2.94143	2.85151	1.92186	2.76613	1.12067	4.55033							forward	-3	-3	-3	-3	-3	-3
A_09_P022996	Euchromatic gene	5.40333	0.892828	2.62258	2.74852	0.128572	4.32254							forward	-3	-3	-3	-3	-3	-3
A_09_P023001	Euchromatic gene	1.44594	2.36412	0	6.38477	6.12673	2.27781							forward	-3	-3	-3	-3	-3	-3
A_09_P023006	Euchromatic gene	3.59642	11.1519	66.086	163.421	549.667	745.952							forward	-7.78	-6.77	-4.24	-3.23	-1.555	-1.16
A_09_P023011	Euchromatic gene	1.62642	4.92734	1.0429	3.86002	4.75924	31.9048							forward	-4.905	-5.96	-6.11	-5.275	-4.92	-2.205
A_09_P023016	Euchromatic gene	2.74065	0	3.60733	4.48776	2.95596	19.5816							forward	-3	-3	-3	-3	-3	2.375
A_09_P023021	Euchromatic gene	2.33843	2.34125	0.773174	2.65047	3.54271	0							forward	-3	-3	-3	-3	-3	-3
A_09_P023026	Euchromatic gene	2.09652	2.11316	4.19909	1.9262	1.67545	8.70306							forward	-3	-3	-3	-3	-3	-3
A_09_P023031	Euchromatic gene	322.811	425.764	207.334	374.072	403.579	69.0086							forward	1.585	2.02	0.59	0.8	0.79	-1.65
A_09_P023036	Euchromatic gene	1.56006	0.352797	0	0.353709	1.65032	1.55111							forward	-3	-3	-3	-3	-3	-3
A_09_P023041	Euchromatic gene	2.09809	1.78751	3.32512	1.12965	4.5716	2.40132							forward	-3	-3	-3	-3	-3	-0.77
A_09_P023046	Euchromatic gene	1.23003	4.80523	3.07194	7.00396	6.32289	4.20872							forward	-3	-3	-3	-3	-3	-3
A_09_P023051	Euchromatic gene	3.09214	9.19204	6.63994	7.10779	4.52839	765.961							forward	-5.685	-4.775	-6.375	-6.205	-6.935	1.795
A_09_P023061	Euchromatic gene	3.51093	1.10229	0	2.69197	1.29613	0.847325							forward	-3	-3	-3	-3	-3	-3
A_09_P023066	Euchromatic gene	4.69249	8.41287	4.7207	84.9265	213.349	2433.71							forward	-6.91	-6.355	-5.775	-2.285	-0.935	2.34
A_09_P023071	Euchromatic gene	18.3122	25.275	16.1329	10.8562	25.5153	381.02							forward	-1.19	-1.26	-1.665	-2.5	-1.22	3.105
A_09_P023076	Euchromatic gene	3.9538	4.8866	8.0389	2.20512	9.40405	23.8216							forward	-3	-3	-3	-3	-3	2.58
A_09_P023081	Euchromatic gene	0.540414	7.5359	1.62391	1.73254	4.2456	1.71625							forward	-3	-3	-3	-3	-3	-3
A_09_P023086	Euchromatic gene	22.2969	19.5335	13.2135	12.847	12.7696	333.157							forward	-1.01	-2.015	-2.485	-3.125	-3.725	2.52
A_09_P023091	Euchromatic gene	706.94	1119.34	688.761	665.437	676.732	226.727							forward	0.68	1.15	0.735	0.33	0.29	-1.275
A_09_P023096	Euchromatic gene	0.928693	5.5211	5.21661	8.91691	5.35265	743.423							forward	-5.44	-5.76	-6.33	-5.405	-6.24	2.42
A_09_P023101	Euchromatic gene	0.540583	0	1.01663	0	2.59044	1.26313							forward	-3	-3	-3	-3	-3	-3
A_09_P023106	Euchromatic gene	0	2.58246	3.026	3.53427	3.2315	3.4263							forward	-3	-3	-3	-3	-3	-3
A_09_P023111	Euchromatic gene	7740.26	15509.7	22722	18753.6	16816.5	3077.82							forward	0.09	0.605	0.995	0.61	0.455	-2.07
A_09_P023116	Euchromatic gene	5727.49	830.564	2681.81	5193.33	6205.41	11905.5							forward	0.065	-3.125	-1.475	-0.625	-0.415	0.435
A_09_P023122	Euchromatic gene	35.0358	24.9891	48.3085	9.61325	15.8345	8.764							forward	1.945	0.56	1.605	-3	-3	-0.885
A_09_P023126	Euchromatic gene	17.0879	320.635	1419.51	1195.25	1065.24	159.34							forward	-3.91	-0.54	1.725	1.3	0.99	-1.885
A_09_P023131	Euchromatic gene	0	493.805	1882.98	1137.18	793.451	165.346							forward	-5.955	1.395	3.325	2.35	1.76	-0.525
A_09_P023136	Euchromatic gene	7.7036	56.9775	133.08	213.404	474.291	1332.77							forward	-6.655	-3.985	-2.655	-2.37	-1.31	0.015
A_09_P023141	Euchromatic gene	16.8705	19.6414	20.4808	20.9269	16.2767	10.8816							forward	-1.4	-1.85	-1.635	-2.27	-2.56	-3.11
A_09_P023146	Euchromatic gene	21.6072	30.1409	26.1638	30.4828	24.3968	2275.52							forward	-6.69	-6.43	-6.735	-6.76	-7.02	-0.845
A_09_P023151	Euchromatic gene	462.685	579.533	1031.16	1153.72	1169.73	181.419							forward	0.98	0.92	1.69	1.59	1.505	-1.295
A_09_P023156	Euchromatic gene	2421.04	5018.74	3557.45	589.301	277.279	2382.9							forward	0.42	1.065	0.855	-1.61	-2.69	0.205
A_09_P023161	Euchromatic gene	1104.04	1773.58	3068.68	4265.5	3803.14	703.262							forward	-0.22	0.16	1.005	1.365	1.255	-1.325
A_09_P023166	Euchromatic gene	1592.16	390.05	2661.59	5219.79	4869.28	928.063							forward	0.055	-1.695	0.64	1.34	1.25	-0.895
A_09_P023171	Euchromatic gene	9.52399	13.9506	96.7452	93.517	38.8789	9.43753							forward	-2.995	-0.94	1.735	1.515	0.12	-1.99
A_09_P023176	Euchromatic gene	4.34312	509.383	2041.17	3138.6	2038.66	87.407							forward	-5.8	0.95	2.825	3.135	2.555	-2.39
A_09_P023181	Euchromatic gene	398.296	494.909	1673.47	1250.35	742.477	990.435							forward	-0.4	-0.33	1.31	0.7	0.02	0.27
A_09_P023186	Euchromatic gene	2294.18	1975.89	1225.47	2484.55	2889.28	172.942							forward	0.67	0.42	-0.25	0.595	0.67	-3.36
A_09_P023191	Euchromatic gene	1233.22	1738.49	354.839	281.204	324.266	2821.97							forward	0.62	0.95	-0.95	-1.615	-1.555	1.26
A_09_P023196	Euchromatic gene	1283.03	1857.88	894.684	1060.94	955.708	402.991							forward	0.765	1.145	0.285	0.595	0.46	-1.125
A_09_P023201	Euchromatic gene	1085.59	2123.06	2685.56	2555.6	2751.85	3593.25							forward	-0.395	0.33	0.72	0.74	0.76	0.93
A_09_P023206	Euchromatic gene	1372.14	2637.72	2785.44	3737.2	3345.3	691.902							forward	0.045	0.76	1.035	1.26	1.19	-1.01
A_09_P023211	Euchromatic gene	3085.75	5508.93	4016.93	2807.55	2497.84	1704.62							forward	0.495	0.915	0.69	0.215	0.01	-0.555
A_09_P023216	Euchromatic gene	4486.63	3816.24	917.889	986.809	1528.92	4444.15							forward	0.45	-0.415	-1.835	-1.835	-1.34	0.095
A_09_P023221	Euchromatic gene	2387.93	1166.26	540.172	835.501	822.536	25.056							forward	1.045	0.005	-0.845	-0.175	-0.305	-6.24
A_09_P023226	Euchromatic gene	3.37076	5.88499	4.77899	53.4059	289.282	304.506							forward	-3.98	-4.57	-4.46	-1.17	1.34	0.85
A_09_P023231	Euchromatic gene	2.96606	7.49187	0.457675	1.29303	2.39874	5.86019							forward	-2.21	-3.305	-3.025	-2.68	-3.37	-2.22
A_09_P023236	Euchromatic gene	1.39244	0.125561	0	5.24526	2.22789	0							forward	-3	-3	-3	-3	-3	-3
A_09_P023241	Euchromatic gene	18.3748	10.5071	6.93397	22.7192	10.9979	589.252							forward	-3.155	-5.305	-5.185	-4.64	-5.465	0.54
A_09_P023246	Euchromatic gene	554.108	737.409	681.178	839.783	695.399	2834.19							forward	-0.235	0.125	-0.345	-0.22	-0.47	1.31
A_09_P023251	Euchromatic gene	103.919	58.8335	46.543	28.7462	35.6908	9.40761							forward	2.005	0.44	0.675	-0.4	-0.335	-1.935
A_09_P023256	Euchromatic gene	0.185201	1.49224	2.30894	12.0131	72.3483	699.764							forward	-5.435	-6.01	-6.87	-4.325	-1.505	2.215
A_09_P023261	Euchromatic gene	3181.71	5145.79	5291.04	5791.9	4384.4	3488.73							forward	-0.23	-0.045	0.205	0.22	-0.12	-0.42
A_09_P023266	Euchromatic gene	7090.51	7850.34	4414.33	3053.09	2026.91	3516.81							forward	0.65	0.225	-0.4	-0.975	-1.69	-0.83
A_09_P023271	Euchromatic gene	320.65	721.241	419.606	236.358	215.746	48.3824							forward	1.325	1.925	1.465	0.075	-0.175	-2.39
A_09_P023276	Euchromatic gene	2200.51	4050.96	2265.34	1683.46	1524.57	1240.98							forward	0.005	0.665	0.13	-0.46	-0.595	-0.845
A_09_P023281	Euchromatic gene	7016.82	14536.1	16384.1	15604.3	12527.5	3411.63							forward	0.015	0.475	0.77	0.685	0.385	-1.725
A_09_P023286	Euchromatic gene	51.2187	70.8331	105.45	519.654	4593.45	20929.5							forward	-5.905	-5.445	-4.985	-3.3	-0.24	1.855
A_09_P023291	Euchromatic gene	18.5293	71.0158	214.074	730.211	3011.57	3236.19							forward	-4.45	-3.355	-1.585	-0.215	1.575	1.735
A_09_P023296	Euchromatic gene	1289.52	2864.84	3026.4	3288.97	2472.27	448.223							forward	0.21	1.05	1.36	1.19	0.815	-1.65
A_09_P023301	Euchromatic gene	2031.15	2711.24	3162.42	3799.15	2699.67	9095.49							forward	-0.74	-0.64	-0.26	-0.13	-0.575	1.085
A_09_P023306	Euchromatic gene	226.367	371.828	420.227	278.776	199.526	58.1277							forward	2.095	1.96	2.445	1.43	0.885	-0.94
A_09_P023311	Euchromatic gene	2441.62	338.757	126.695	331.61	786.781	1819.46							forward	0.315	-2.53	-3.38	-2.195	-1.05	-0.09
A_09_P023316	Euchromatic gene	4652.2	6387.84	3754.68	2974.64	1948.86	1400.8							forward	0.41	0.375	-0.085	-0.64	-1.12	-1.5
A_09_P023321	Euchromatic gene	64.3321	43.3014	24.8184	20.6725	15.8823	9.89426							forward	2.68	1.575	0.99	-0.185	-0.135	-1.66
A_09_P023326	Euchromatic gene	7.03192	3.83161	5.37364	1.11598	8.04992	9.36428							forward	-3	-3	-3	-3	-3	-3
A_09_P023331	Euchromatic gene	0.28816	2.35636	2.99117	0.659119	1.43121	13.4915							forward	-3	-3	-3	-3	-3	-3
A_09_P023336	Euchromatic gene	17.8094	29.0948	23.2349	24.6263	28.1223	874.79							forward	-3.83	-3.945	-4.185	-4.28	-4.46	0.89
A_09_P023341	Euchromatic gene	504.521	1056.6	1469.22	1767.25	1568.15	1097.97							forward	-0.755	0.165	0.715	0.665	0.455	0
A_09_P023346	Euchromatic gene	3260.74	3051.7	2752.06	2946.42	2623.44	2772.09							forward	-0.3	-0.785	-0.77	-0.625	-0.765	-0.96
A_09_P023351	Euchromatic gene	1388.07	3332.88	640.918	534.411	505.575	382.711							forward	0.59	1.35	-0.28	-0.83	-0.925	-1.58
A_09_P023356	Euchromatic gene	7.22176	7.10433	6.85643	5.94076	4.35434	4.49094							forward	-1.2	-1.475	-0.975	-2.125	-1.445	-1.555
A_09_P023361	Euchromatic gene	1930.27	263.616	757.035	938.934	1012.94	818.207							forward	1.465	-1.17	0.18	0.46	0.45	0.14
A_09_P023366	Euchromatic gene	183.676	103.938	408.076	709.67	898.703	46.785							forward	0.555	-1.09	1.085	1.635	1.85	-2.985
A_09_P023371	Euchromatic gene	3248.37	6381.77	6184.43	5304.69	2599.74	2025.14							forward	0.235	0.79	0.98	0.51	-0.435	-0.705
A_09_P023381	Euchromatic gene	0	1.18256	0	0.830644	3.9055	0							forward	-3	-3	-3	-3	-3	-3
A_09_P023386	Euchromatic gene	3.60377	3.93702	4.78416	3.07294	5.31906	0							forward	-3	-3	-3	-3	-3	-3
A_09_P023391	Euchromatic gene	1422.94	250.522	340.255	581.854	843.401	270.762							forward	1.095	-1.06	-0.645	-0.125	0.235	-1.42
A_09_P023396	Euchromatic gene	5.98726	8.4523	9.87115	24.5484	22.7636	43.5543							forward	-3.125	-3.125	-2.885	-2.065	-2.335	-1.035
A_09_P023401	Euchromatic gene	2.21476	3.79071	1.51088	0.818917	2.45261	2.68357							forward	-3	-1.45	-3	-1.925	-2.025	-1.83
A_09_P023411	Euchromatic gene	1.74951	4.11312	0.16288	2.89558	1.94891	1.83959							forward	-2.16	-2.415	-2.925	-2.49	-2.65	-3.075
A_09_P023416	Euchromatic gene	4.12299	2.71232	0.995355	0.0547815	2.2602	202.736							forward	-3.76	-4.67	-4.88	-3.98	-4.575	2.795
A_09_P023421	Euchromatic gene	25.3218	34.4763	36.3015	53.2527	31.9843	71387.3							forward	-6.485	-6.1	-6.37	-5.7	-6.42	4.05
A_09_P023426	Euchromatic gene	36.6993	68.8127	134.049	194.502	248.701	29095.3							forward	-3.755	-3.475	-2.475	-2.29	-2.11	3.875
A_09_P023431	Euchromatic gene	380.852	31.6178	7.25459	11.2659	15.157	253.416							forward	1.84	-2.805	-4.925	-5.06	-4.65	-0.355
A_09_P023436	Euchromatic gene	48.3895	35.5018	10.3116	7.52785	6.64521	27.4148							forward	1.12	-0.655	-2.08	-3.275	-3.56	-1.38
A_09_P023441	Euchromatic gene	108.809	66.8575	7.38806	7.89643	10.5201	30.9941							forward	1.92	0.26	-3.435	-3.28	-3.26	-0.64
A_09_P023446	Euchromatic gene	3226.25	229.38	739.248	2359.9	2403.18	433.066							forward	0.51	-3.075	-1.455	-0.085	-0.005	-2.49
A_09_P023451	Euchromatic gene	1267.63	154.868	15.08	19.0545	11.108	411.757							forward	2.17	-1.06	-4.94	-4.825	-5.29	-0.115
A_09_P023456	Euchromatic gene	8533.35	2735.72	585.087	339.605	265.536	688.586							forward	1.26	-1.04	-2.78	-3.515	-4.09	-2.81
A_09_P023461	Euchromatic gene	4.76276	14.9702	28.9178	42.3355	41.2411	452.983							forward	-5.93	-5.155	-3.93	-3.875	-3.825	-0.41
A_09_P023466	Euchromatic gene	517.354	258.55	325.913	712.827	558.575	230.655							forward	1.315	0.15	0.465	1.24	0.83	-0.66
A_09_P023471	Euchromatic gene	0.78666	1.79051	1.368	2.30013	5.59336	0							forward	-3	-3	-3	-3	-3	-3
A_09_P023476	Euchromatic gene	0.668623	6.15143	7.83544	17.0881	53.9842	1.12142							forward	-3	-0.96	-0.905	0.32	1.895	-3.135
A_09_P023481	Euchromatic gene	928.696	230.519	284.117	328.85	323.586	657.976							forward	0.8	-1.1	-0.615	-0.63	-0.815	0.14
A_09_P023486	Euchromatic gene	436.644	135.974	48.8392	58.447	30.3077	64.2859							forward	2.425	0.28	-1.345	-1.48	-2.71	-1.495
A_09_P023491	Euchromatic gene	238.849	392.173	650.091	1047.39	1196.3	846.838							forward	0.035	0.24	0.82	1.215	1.275	0.875
A_09_P023496	Euchromatic gene	1092.85	1115.73	2996.43	3707.99	3159.59	862.457							forward	-0.395	-0.57	0.96	1.075	0.87	-1.025
A_09_P023501	Euchromatic gene	8.78156	8.98939	12.8955	33.0534	22.9256	3777.9							forward	-3.74	-4.375	-4.045	-3.495	-4.355	4.05
A_09_P023506	Euchromatic gene	5.07217	6.31301	5.00575	16.6172	13.4791	1176.18							forward	-5.38	-6.715	-6.56	-5.13	-5.505	1.135
A_09_P023511	Euchromatic gene	2514.6	339.739	2050.4	3946.67	4049.47	2129.81							forward	-0.08	-2.87	-0.31	0.38	0.49	-0.415
A_09_P023521	Euchromatic gene	852.829	1394.19	1365.39	1772.42	1566.73	2307.97							forward	-0.27	0.355	0.405	0.545	0.365	0.965
A_09_P023526	Euchromatic gene	45.4159	69.4853	60.1873	103.706	94.4736	908.659							forward	-3.88	-3.79	-3.88	-3.425	-3.575	-0.47
A_09_P023531	Euchromatic gene	2.39999	4.67138	4.16575	4.46136	9.74818	4.66866							forward	-3	-3	-3	-3	-3	-3
A_09_P023536	Euchromatic gene	231.184	343.428	296.345	301.223	222.866	457.823							forward	1.475	1.585	1.025	0.525	0.075	1.07
A_09_P023541	Euchromatic gene	0	1.88161	3.24908	2.81314	2.89669	2.89917							forward	-3	-3	-3	-3	-3	-3
A_09_P023546	Euchromatic gene	4.52427	0.771825	4.46439	7.95795	10.8577	2.02646							forward	-3	-3	-3	-3	-3	-3
A_09_P023551	Euchromatic gene	1.6623	7.08648	6.05144	9.43286	11.6815	250.16							forward	-2.26	-1.54	-1.065	-2.005	-1.79	3.875
A_09_P023556	Euchromatic gene	643.431	1221.73	853.283	679.04	586.729	174.401							forward	-0.17	0.52	0.115	0.03	-0.54	-2.915
A_09_P023561	Euchromatic gene	714.669	1435.22	1649.88	1825.61	1573.69	352.251							forward	-0.455	0.23	0.515	0.52	0.175	-1.93
A_09_P023566	Euchromatic gene	0	2.7616	0	1.32393	3.83645	2.21415							forward	-3	-3	-3	-3	-3	-3
A_09_P023571	Euchromatic gene	1056.09	456.709	421.616	545.811	631.196	330.612							forward	0.85	-0.185	-0.085	-0.015	0.11	-0.87
A_09_P023576	Euchromatic gene	1017.29	932.327	407.485	457.246	544.107	785.445							forward	0.85	0.63	-0.355	-0.42	-0.225	0.27
A_09_P023581	Euchromatic gene	1009.85	2212.56	1791.8	2022.16	2174.49	444.788							forward	0.12	0.825	0.92	1.015	1.07	-1.25
A_09_P023586	Euchromatic gene	1883.23	822.997	115.178	80.647	105.245	2042.38							forward	1	-0.21	-2.695	-3.46	-3.1	0.965
A_09_P023591	Euchromatic gene	2321.4	3763.9	3688.78	3674.04	2899.64	1169.98							forward	-0.01	0.42	0.49	0.34	0.065	-1.145
A_09_P023596	Euchromatic gene	1269.38	737.828	1622.44	2522.1	2437.26	992.242							forward	0.11	-0.675	0.625	1.02	0.815	-0.335
A_09_P023601	Euchromatic gene	876.008	815.947	505.767	467.721	296.99	8068.94							forward	-1.205	-1.17	-1.3	-1.78	-2.545	1.685
A_09_P023606	Euchromatic gene	5.35999	66.9008	244.536	547.808	728.76	312.422							forward	-5.745	-1.825	0.37	1.15	1.565	0.19
A_09_P023611	Euchromatic gene	583.919	1255.87	1830.7	1849.36	1680.52	361.867							forward	0.065	0.95	1.17	1.285	0.945	-1.325
A_09_P023616	Euchromatic gene	0.4929	8.71965	5.62188	3.77167	8.08593	84.3607							forward	-1.675	-3	-1.985	-1.97	-1.765	3.31
A_09_P023621	Euchromatic gene	5.51524	4.15265	1.05815	4.93071	4.77818	10.6212							forward	-3	-2.13	-3	-1.6	-2.11	0.235
A_09_P023626	Euchromatic gene	0	1.32999	1.03281	1.87579	2.84458	3.18571							forward	-3	-3	-3	-3	-3	-3
A_09_P023631	Euchromatic gene	5.74807	3.15226	2.9021	5.48661	5.50586	5.56385							forward	-3	-3	-3	-3	-3	-3
A_09_P023636	Euchromatic gene	10707.6	14344	21600	21594.4	22092.6	36822.3							forward	-0.14	0	0.015	0.03	-0.04	0.35
A_09_P023641	Euchromatic gene	6.72851	0.443547	2.07457	6.59241	0	0.684156							forward	-3	-3	-3	-3	-3	-3
A_09_P023646	Euchromatic gene	4.36842	33.7123	38.9674	9.85781	14.0184	86.8662							forward	-3	2.945	3.51	-3	-3	2.285
A_09_P023651	Euchromatic gene	6.38901	1.15132	2.43076	5.01799	5.8059	4.16222							forward	-3	-3	-3	-3	-3	-3
A_09_P023656	Euchromatic gene	4.91885	5.70202	3.92011	2.15534	4.18461	9.97813							forward	-1.935	-2.17	-3.375	-2.825	-3.58	-1.045
A_09_P023661	Euchromatic gene	4.31999	5.9934	2.84711	5.94621	4.90829	116.865							forward	-2.84	-3.265	-3.535	-2.745	-3.595	2.325
A_09_P023666	Euchromatic gene	1.12589	0	0	2.89741	3.19374	87.4355							forward	-1.565	-3	-2.29	-1.92	-2.19	3.815
A_09_P023671	Euchromatic gene	5.55857	17.4231	25.9408	21.9465	26.5685	5.60477							forward	-1.69	0.91	1.65	1.105	0.64	-1.055
A_09_P023676	Euchromatic gene	574.297	1060.8	824.236	825.503	658.712	676.047							forward	0.69	1.24	1.105	1.005	0.65	0.395
A_09_P023681	Euchromatic gene	1113.81	1681.78	1371.47	2320.99	2028.74	319.97							forward	0.24	0.55	0.715	1.095	0.915	-1.71
A_09_P023686	Euchromatic gene	709.437	1456.41	1601.23	1010	1030.5	528.965							forward	-0.15	0.695	0.79	0.065	0.005	-0.97
A_09_P023691	Euchromatic gene	931.149	550.2	2340.26	3860.2	4135.08	72.2197							forward	0.285	-0.49	1.39	1.755	1.71	-3.93
A_09_P023696	Euchromatic gene	1285.15	1898.33	1992.5	2156.71	1390.46	1099.81							forward	0.065	0.595	0.715	0.59	-0.125	-0.31
A_09_P023701	Euchromatic gene	3.11728	10.415	7.8042	3.76863	2.59029	5.2484							forward	-3	-3	-3	-3	-3	-3
A_09_P023706	Euchromatic gene	2.25691	2.32732	1.83987	3.72666	7.61822	2.0087							forward	-3	-3	-3	-3	-3	-3
A_09_P023711	Euchromatic gene	3.52672	0.993056	2.15389	2.8746	3.02217	1.17109							forward	-3	-3	-3	-3	-3	-3
A_09_P023716	Euchromatic gene	27.3813	38.7468	30.4854	38.6694	30.797	52.7266							forward	-2.34	-2.66	-2.98	-2.975	-3.33	-2.805
A_09_P023721	Euchromatic gene	1.32706	2.41284	3.51231	2.6035	2.10876	61.9061							forward	-2.145	-2.655	-2.705	-2.47	-2.89	2.27
A_09_P023726	Euchromatic gene	1254.94	648.931	2178.36	2051.02	1671.04	358.559							forward	0.83	-0.055	1.525	1.295	0.97	-1.275
A_09_P023731	Euchromatic gene	5940.2	8842.56	7241.61	6358.77	4676.94	2803.02							forward	0.46	0.775	0.33	-0.075	-0.38	-1.05
A_09_P023736	Euchromatic gene	6.9738	2.39935	0.272488	3.42151	0	107.298							forward	-2.605	-3.49	-3.65	-3.11	-3.705	2.38
A_09_P023741	Euchromatic gene	926.144	1048.39	809.868	723.903	568.91	67.9163							forward	1.145	1.045	0.785	0.415	0.085	-3.485
A_09_P023746	Euchromatic gene	344.584	728.037	701.386	895.998	816.99	77.7783							forward	0.475	1.185	1.18	1.01	0.8	-2.665
A_09_P023751	Euchromatic gene	0	3.02806	1.38431	3.32687	0	0							forward	-3	-3	-3	-3	-3	-3
A_09_P023756	Euchromatic gene	0	0.787955	2.60506	1.45119	0	2.70964							forward	-3	-3	-3	-3	-3	-3
A_09_P023761	Euchromatic gene	0.151266	0	5.77192	5.61676	2.54341	11.9116							forward	-3	-3	-3	-3	-3	-3
A_09_P023766	Euchromatic gene	80.6267	86.8716	242.456	305.632	244.402	5.09158							forward	1.43	1.005	2.895	2.7	2.5	-3.8
A_09_P023771	Euchromatic gene	3928.43	5241.68	1998.03	2452.83	2488.08	652.482							forward	0.8	0.795	-0.255	0.03	-0.01	-1.9
A_09_P023776	Euchromatic gene	666.4	1226.95	1626.51	2256.12	1973.53	197.825							forward	-0.08	0.69	1.175	1.325	1.2	-2.205
A_09_P023781	Euchromatic gene	582.487	474.403	64.5171	153.038	261.1	152.89							forward	1.13	0.49	-2.3	-1.285	-0.585	-1.83
A_09_P023786	Euchromatic gene	1265.6	71.759	194.408	775.195	1190.87	306.58							forward	1.465	-2.26	-1.135	0.465	0.92	-0.895
A_09_P023791	Euchromatic gene	4438.91	7366.53	2179.56	516.513	321.205	733.682							forward	0.62	0.98	-0.505	-2.28	-2.92	-2.085
A_09_P023796	Euchromatic gene	1057.25	1953.89	1708.66	1463	1222.06	24.174							forward	0.955	1.57	1.67	1.18	0.83	-5.245
A_09_P023801	Euchromatic gene	0	0.705284	1.56861	2.25334	2.55636	3.58141							forward	-3	-3	-3	-3	-3	-3
A_09_P023806	Euchromatic gene	4.03354	39.9424	58.7542	44.1009	47.8577	7.16712							forward	-1.71	2.405	3.49	1.875	1.515	-0.79
A_09_P023811	Euchromatic gene	5327.29	5315.79	4930.39	7866.68	11994.1	5798.72							forward	-0.35	-1.085	-1.06	-0.375	0.215	-1.08
A_09_P023816	Euchromatic gene	1578.74	2838.18	3004.93	2418.03	1626.76	1422.19							forward	-0.06	0.595	0.76	0.54	-0.02	-0.365
A_09_P023821	Euchromatic gene	2190.74	3563.07	1265.26	1201.59	1269.2	458.396							forward	0.465	0.915	-0.06	-0.395	-0.325	-1.705
A_09_P023826	Euchromatic gene	3369.43	414.361	1195.9	2178.99	3043.03	810.929							forward	1	-1.655	-0.47	0.015	0.45	-1.405
A_09_P023831	Euchromatic gene	88.7392	180.222	315.045	353.733	226.796	26.2764							forward	1.105	1.43	2.325	2.16	1.33	-2.05
A_09_P023836	Euchromatic gene	291.179	652.886	430.704	189.573	38.9087	999.341							forward	-1.465	-0.565	-0.925	-2.24	-4.7	-0.225
A_09_P023841	Euchromatic gene	1442.61	3139.77	1666.37	1831.13	2063.16	1846.76							forward	-0.235	0.52	0.04	0.145	0.285	0.115
A_09_P023846	Euchromatic gene	4.78875	4.77419	5.99235	7.99971	9.14348	7.78671							forward	-3	-3	-1.035	-3	-3	-1.25
A_09_P023851	Euchromatic gene	610.286	188.925	133.081	323.039	1223.49	8178.82							forward	-0.81	-2.27	-2.875	-1.945	-0.195	2.455
A_09_P023856	Euchromatic gene	2.60829	4.026	5.48687	4.34967	5.269	7.24268							forward	-1.74	-2.045	-1.985	-2.02	-2.77	-0.305
A_09_P023861	Euchromatic gene	2.96455	0.0160563	1.49672	2.16555	1.05014	2.40511							forward	-3	-3	-3	-3	-3	-3
A_09_P023866	Euchromatic gene	8.37271	11.0473	13.237	22.8918	17.1859	1724.38							forward	-5.16	-5.285	-5.025	-4.43	-4.705	2.065
A_09_P023871	Euchromatic gene	2.66377	4.58571	2.50519	5.71561	0.111132	28.1607							forward	-3.205	-4.215	-3.91	-3.735	-4.045	0.175
A_09_P023876	Euchromatic gene	249.375	380.4	428.324	586.684	565.805	21430.7							forward	-3.475	-2.845	-2.58	-2.455	-2.51	1.945
A_09_P023881	Euchromatic gene	32.7626	52.5029	47.5123	64.3879	43.6912	9371.28							forward	-4.005	-3.965	-4.01	-3.88	-4.59	2.9
A_09_P023886	Euchromatic gene	1.00879	2.98306	0.798502	0.860577	2.73179	9.39647							forward	-3	-3	-3	-3	-3	-3
A_09_P023891	Euchromatic gene	77.0035	69.3518	381.647	738.308	1052.47	2185.59							forward	-1.695	-2.68	-0.15	0.61	1.11	1.935
A_09_P023896	Euchromatic gene	885.695	230.266	32.2814	47.6705	67.2347	134.331							forward	1.99	-0.35	-3.34	-2.685	-2.17	-1.795
A_09_P023901	Euchromatic gene	1389.71	828.66	457.528	1225.61	2077.94	953.068							forward	-0.53	-1.155	-1.915	-0.74	-0.095	-1.19
A_09_P023906	Euchromatic gene	6102.66	3378.35	2920.82	6185.36	7392.89	318.089							forward	0.97	-0.285	-0.35	0.63	0.89	-3.555
A_09_P023911	Euchromatic gene	1034.46	1026.87	269.265	512.771	583.831	99.1573							forward	0.835	0.965	-1.01	-0.02	0.04	-2.93
A_09_P023916	Euchromatic gene	6.35831	7.70953	7.28438	55.1856	259.57	760.439							forward	-4.305	-3.885	-3.915	-1.45	0.86	2.38
A_09_P023921	Euchromatic gene	32.7856	185.68	1110.7	2948.65	4267.47	1190.71							forward	-3.58	-1.73	0.82	1.875	2.25	0.51
A_09_P023926	Euchromatic gene	1462.44	146.716	22.7546	19.5804	24.7262	2248.54							forward	1.065	-2.07	-4.785	-5.235	-5.055	1.38
A_09_P023931	Euchromatic gene	22.9371	29.8201	4.88066	5.88894	7.60224	386.243							forward	-1.51	-2.12	-4.36	-5.595	-5.435	1.625
A_09_P023936	Euchromatic gene	3.4462	1.99673	6.72606	4.29356	3.0837	20.4937							forward	-3	-3	-3	-3	-3	2.225
A_09_P023941	Euchromatic gene	3285.66	5229.85	4086.81	5632.24	6339.91	4345.64							forward	-0.005	0.22	-0.06	0.11	0.335	-0.1
A_09_P023946	Euchromatic gene	3980.18	1331.75	1885.09	1914.45	1895.38	908.499							forward	0.75	-1.19	-0.36	-0.335	-0.36	-1.41
A_09_P023951	Euchromatic gene	7884.84	16451.2	16637.8	15998.3	18053	26299.2							forward	-0.105	0.425	0.335	0.075	0.31	0.585
A_09_P023956	Euchromatic gene	1750.16	2464.37	2266.65	3183.03	2921.83	1687.37							forward	0.195	0.58	0.575	0.75	0.685	0
A_09_P023961	Euchromatic gene	451.377	750.958	569.259	659.786	416.152	141.422							forward	1.57	1.89	1.585	1.31	0.585	-1.225
A_09_P023966	Euchromatic gene	764.671	1739.61	1565.97	1399.73	905.608	107.75							forward	1.365	1.705	1.26	1.085	0.555	-3.03
A_09_P023971	Euchromatic gene	3239.51	345.646	333.249	939.011	1627.65	221.582							forward	1.465	-1.41	-1.52	-0.395	0.26	-2.98
A_09_P023976	Euchromatic gene	8260.24	14638.9	20032.5	14202.1	12589.8	16260.2							forward	0.13	0.47	0.71	0.06	-0.145	-0.035
A_09_P023981	Euchromatic gene	2653.49	3813.79	2994.59	2626.52	2769.89	4121.02							forward	0.125	0.295	0.13	-0.18	-0.13	0.41
A_09_P023986	Euchromatic gene	2448.99	3213.88	908.249	1554.85	1317.45	91.4081							forward	1.095	1.19	-0.36	0.37	0.14	-4.21
A_09_P023991	Euchromatic gene	546.205	950	167.406	144.141	232.875	27.1071							forward	1.09	1.37	-0.67	-1.11	-0.5	-4.045
A_09_P023996	Euchromatic gene	566.695	488.209	126.59	200.418	255.588	242.275							forward	2.04	1.305	-0.38	-0.09	0.23	-0.15
A_09_P024001	Euchromatic gene	1433.95	2215.32	688.981	613.954	678.198	336.008							forward	1.135	1.525	0.335	0.225	0.25	-1.385
A_09_P024011	Euchromatic gene	1841.44	3688.78	5177.22	3767.13	4149.94	10033.8							forward	-0.665	0.11	0.43	0.17	0.205	1.355
A_09_P024016	Euchromatic gene	9.85792	26.5883	38.8501	89.4351	110.113	94.4612							forward	-3.375	-2.59	-1.78	-0.895	-0.65	-1.035
A_09_P024026	Euchromatic gene	32.6627	46.6018	57.4107	33.6705	22.136	12201							forward	-4.31	-4.23	-4.255	-4.965	-5.94	3.32
A_09_P024031	Euchromatic gene	1.4207	4.1415	3.51986	2.10338	3.20196	21.9939							forward	-3	-3	-3	-3	-3	2.055
A_09_P024036	Euchromatic gene	4.34905	6.34229	0.270439	5.09592	2.89607	39.6036							forward	-3	-1.425	-3	-3	-1.95	1.945
A_09_P024041	Euchromatic gene	4168.53	9049.77	10167.4	9202.95	8092.27	3478.95							forward	-0.425	0.355	0.55	0.285	0.195	-1.035
A_09_P024046	Euchromatic gene	5073.84	5701.08	2826.35	2778.84	4221.67	2540.1							forward	0.695	0.23	-0.475	-0.395	0.115	-0.735
A_09_P024051	Euchromatic gene	2935.14	3658.29	725.232	1261.16	1947.88	1063.87							forward	0.96	0.89	-0.91	-0.29	0.23	-0.78
A_09_P024056	Euchromatic gene	139.074	234.981	87.4338	28.9997	21.4509	76.8107							forward	1.39	1.47	0.315	-1.76	-2.565	-0.345
A_09_P024061	Euchromatic gene	2427.67	926.147	334.914	314.864	477.349	275.015							forward	1.485	0.405	-1.285	-1.325	-0.875	-2.11
A_09_P024071	Euchromatic gene	4582.69	6844.84	5302.28	4619.39	4595.87	2222.53							forward	0.345	0.41	0.38	0.17	0.1	-1.02
A_09_P024076	Euchromatic gene	1.33417	2.69137	2.21439	5.01623	0.972657	2.36242							forward	-3	-3	-3	-3	-3	-3
A_09_P024081	Euchromatic gene	1.29587	0	3.49177	4.52307	5.23974	0.781159							forward	-3	-3	-3	-3	-3	-3
A_09_P024086	Euchromatic gene	1.3735	0.56487	0.408397	3.60073	0.397564	1.66802							forward	-3	-3	-3	-3	-3	-3
A_09_P024091	Euchromatic gene	4.15128	3.96225	1.42762	4.43269	0.994984	2.84267							forward	-3	-3	-3	-3	-3	-3
A_09_P024096	Euchromatic gene	2.4243	3.19747	2.75892	1.98103	3.89151	0.458667							forward	-3	-3	-3	-3	-3	-3
A_09_P024101	Euchromatic gene	112.091	101.548	136.584	75.0415	58.3696	14.2689							forward	2.055	1.495	1.545	1.12	0.645	-2.375
A_09_P029426	Euchromatic gene	1466.52	2041.16	1334.65	1581.95	1369.26	503.312							forward	0.52	0.9	0.405	0.375	0.225	-1.395
A_09_P029431	Euchromatic gene	523.858	449.029	297.259	314.868	293.846	172.491							forward	1.375	0.885	0.11	0.215	0.035	-1.195
A_09_P029441	Euchromatic gene	12878.5	19414.2	11036.7	9537.23	8241.2	918.051							forward	0.47	0.565	-0.545	-1.07	-1.27	-4.335
A_09_P029466	Euchromatic gene	5.58051	8.45168	11.2189	57.6406	85.2454	58.9434							forward	-3.52	-3.635	-2.125	0.355	1.005	-0.03
A_09_P029471	Euchromatic gene	1.02448	4.22576	1.01334	0	1.32489	0.0127682							forward	-3	-3	-3	-3	-3	-3
A_09_P029496	Euchromatic gene	12718.2	1472.7	754.105	336.709	374.227	27046.2							forward	1.485	-2.41	-3.14	-4.075	-4.06	1.425
A_09_P029586	Euchromatic gene	0.19601	0	0	0	4.07547	1.99985							forward	-3	-3	-3	-3	-3	-3
A_09_P029591	Euchromatic gene	0	3.19281	3.07637	1.42977	2.45704	1.56577							forward	-3	-3	-3	-3	-3	-3
A_09_P029616	Euchromatic gene	4.15562	3.80195	4.43945	7.06575	6.29517	8.25132							forward	-3	-3	-3	-3	-3	-3
A_09_P029651	Euchromatic gene	30334.4	53473.5	60239.2	68470.4	64604.2	3041.44							forward	0.65	0.905	0.98	0.9	0.645	-4.44
A_09_P029661	Euchromatic gene	1.57249	3.39684	1.34724	16.3088	6.89916	201.035							forward	-5.455	-6.39	-5.595	-3.525	-5.195	0.29
A_09_P029686	Euchromatic gene	1152.92	643.771	1180.07	2163.54	2286.78	349.626							forward	0.31	-0.485	0.225	0.98	1.045	-1.86
A_09_P029831	Euchromatic gene	900.557	2247.41	2647.66	2277.36	1293.03	169.108							forward	0.16	1.125	1.585	1.21	0.39	-2.67
A_09_P029836	Euchromatic gene	31.723	41.3238	52.9365	100.229	84.1599	2.71944							forward	1.5	1.61	2.195	2.73	2.155	-2.505
A_09_P029931	Euchromatic gene	75.9359	67.7267	30.0802	29.5462	22.6817	13.0016							forward	1.365	0.35	-0.905	-1.21	-1.925	-2.395
A_09_P030046	Euchromatic gene	24.8533	24.2076	28.8448	58.0119	115.375	102.547							forward	-1.205	-1.83	-1.15	-0.655	0.485	0.225
A_09_P030091	Euchromatic gene	3.04281	16.1646	9.10594	14.458	10.9289	240.524							forward	-2.585	-0.29	-1.01	-1.035	-2.195	3.545
A_09_P030156	Euchromatic gene	7.28772	32.2823	89.1295	229.902	527.144	458.909							forward	-4.51	-2.57	-0.83	0.24	1.48	1.38
A_09_P030176	Euchromatic gene	3.78197	3.38363	2.86781	4.83189	1.57004	18.8751							forward	-3	-3	-3	-3	-3	2.335
A_09_P030181	Euchromatic gene	1382.37	2238.66	1894.36	1567.86	755.074	441.345							forward	0.35	0.745	0.885	0.365	-0.55	-1.455
A_09_P030186	Euchromatic gene	5511.37	4461.37	4285.27	6746.89	9836.03	389.001							forward	0.445	-0.42	-0.29	0.295	0.875	-3.625
A_09_P030216	Euchromatic gene	15.7013	66.0102	422.065	610.415	983.294	18.6025							forward	-3.06	-1.99	1.13	1.59	2.13	-4.43
A_09_P030226	Euchromatic gene	4797.27	7999.1	12483.5	13238	13111.5	1021.73							forward	-0.29	0.125	0.54	0.715	0.675	-3.125
A_09_P030296	Euchromatic gene	5.80632	0	1.6798	5.95746	3.36652	0.794989							forward	-3	-3	-3	-3	-3	-3
A_09_P030301	Euchromatic gene	2.06255	2.23533	5.0495	5.90625	6.66679	18.8709							forward	-3.485	-4.045	-3.805	-4.31	-4.445	-1.33
A_09_P030311	Euchromatic gene	1657.88	644.715	122.441	106.978	108.899	122.849							forward	0.905	-0.215	-2.265	-2.9	-3.02	-2.98
A_09_P030321	Euchromatic gene	4.3585	3.43613	2.65806	0	1.88004	6.19042							forward	-3	-3	-3	-3	-3	-3
A_09_P030381	Euchromatic gene	7618.48	16069.8	25484.1	38470.8	50579.3	8883.18							forward	-1.13	-0.575	0.02	0.29	0.645	-2.125
A_09_P030386	Euchromatic gene	0.243251	4.72534	4.85187	2.89393	5.67399	13.3114							forward	-3	-3	-3	-3	-3	-3
A_09_P030391	Euchromatic gene	0	0.544716	1.83738	0	5.32923	14.7425							forward	-3	-1.055	-3	-3	-3	-3
A_09_P030461	Euchromatic gene	1330.63	242.108	651.234	1006.76	998.421	921.056							forward	1.2	-1.26	0.23	0.545	0.57	0.35
A_09_P030506	Euchromatic gene	3576.9	7498.61	8960.59	11949.2	11829.5	18011.8							forward	-1.07	-0.45	-0.015	0.215	0.23	0.64
A_09_P030526	Euchromatic gene	12.865	15.6756	13.1894	6.74901	9.77403	15.4581							forward	0.595	0.335	0.31	-1.715	-0.765	-0.07
A_09_P030631	Euchromatic gene	868.124	589.51	908.271	1793.47	1544.62	39.0643							forward	0.97	0.155	0.955	1.57	1.24	-4.195
A_09_P030701	Euchromatic gene	4016.01	788.176	1420.29	3105.93	5587.07	615.532							forward	0.65	-1.685	-0.85	-0.07	0.7	-2.185
A_09_P030711	Euchromatic gene	158.505	283.615	793.101	959.971	1131.98	4718.18							forward	-4.315	-3.525	-2.19	-2.025	-1.875	-0.335
A_09_P030716	Euchromatic gene	5998	12122.9	13819.3	10187.4	6310.15	1416.68							forward	0.07	0.545	0.735	0.385	-0.22	-2.575
A_09_P030746	Euchromatic gene	2822.38	2242.06	2496.67	3457.54	3671.48	1369.22							forward	-0.04	-0.595	-0.155	0.165	0.18	-1.17
A_09_P030791	Euchromatic gene	1247.6	98.0689	357.29	1146.36	1300.22	59.3445							forward	1.19	-2.62	-0.455	0.835	0.96	-3.99
A_09_P030801	Euchromatic gene	28.3558	221.148	2083.18	3188.8	6787.69	2105.03							forward	-6.065	-3.625	-0.685	-0.25	0.685	-0.805
A_09_P030806	Euchromatic gene	2.90795	3.25012	2.09508	2.72473	1.64128	2.0597							forward	-3	-3	-3	-3	-3	-3
A_09_P030811	Euchromatic gene	6290.17	12458.6	7918.84	7069.59	9145.12	480.776							forward	0.35	0.85	0.075	-0.24	0.1	-4.02
A_09_P030816	Euchromatic gene	9959.46	559.388	1970.19	5086.04	8067.47	17025.6							forward	1	-3.65	-1.91	-0.665	-0.05	0.835
A_09_P030826	Euchromatic gene	77.466	217.171	151.298	134.396	131.247	3502.88							forward	-2.54	-1.6	-2.265	-2.585	-2.545	1.625
A_09_P030831	Euchromatic gene	0.447171	0	0.750722	1.73666	7.1153	48.4436							forward	-3.12	-3.685	-4.2	-3.21	-3.36	0.735
A_09_P030866	Euchromatic gene	666.815	1439.36	1548.72	1415.04	1058.93	670.077							forward	-0.09	0.785	1.065	0.86	0.37	-0.495
A_09_P030871	Euchromatic gene	12833.3	22425.3	24274.9	30862.7	33460.5	52270.8							forward	-0.415	-0.2	-0.305	-0.13	-0.095	0.33
A_09_P030906	Euchromatic gene	745.29	1016.29	643.239	840.643	857.704	35.5338							forward	1.205	1.39	0.64	1.065	0.975	-4.5
A_09_P030916	Euchromatic gene	6168.34	1873.28	1135.73	2372.09	2579.77	88.5797							forward	1.14	-0.875	-1.36	-0.505	-0.5	-5.42
A_09_P030946	Euchromatic gene	183.491	314.856	2105.27	4114.19	4489.4	4093.84							forward	-2.74	-2.125	0.135	1.1	1.14	0.95
A_09_P031006	Euchromatic gene	10.9986	13.8562	18.9027	9.49507	10.7398	9.61258							forward	-3	-3	1.225	-3	-3	-0.105
A_09_P031041	Euchromatic gene	564.158	626.02	515.119	210.684	76.086	643.613							forward	1.065	1.08	0.72	-0.475	-2.1	0.65
A_09_P031056	Euchromatic gene	0.10067	4.8384	0.654596	1.6096	4.57692	78.8795							forward	-3	-3.47	-4.375	-3.67	-4.2	1.295
A_09_P031096	Euchromatic gene	1577.56	897.369	1642.19	2127.99	1670.06	339.198							forward	0.785	0.17	1.04	1.15	0.775	-1.57
A_09_P031106	Euchromatic gene	10248.4	17897.1	7587.68	4188.85	5249.95	10527							forward	0.62	0.95	-0.54	-1.445	-1.165	-0.175
A_09_P031126	Euchromatic gene	50.9837	28.8561	13.6665	12.1735	9.09614	59.2738							forward	0.7	-0.98	-1.555	-3.23	-4.44	0.44
A_09_P031131	Euchromatic gene	3192.56	6275.27	7130.22	5051.96	6159.23	1189.16							forward	-0.175	0.36	0.715	0.23	0.585	-1.835
A_09_P031151	Euchromatic gene	20164.8	33851.2	39096.6	43088.2	47881.5	71326.8							forward	-0.2	-0.025	-0.13	-0.035	0.005	0.155
A_09_P031161	Euchromatic gene	32326	53683	62917.1	68506.1	76182.4	110650							forward	0.005	0.15	0.065	0.085	0.135	-0.12
A_09_P031186	Euchromatic gene	812.138	381.133	592.487	634.376	586.352	365.384							forward	1.67	0.36	0.97	1.14	0.93	-0.14
A_09_P031191	Euchromatic gene	265.036	220.856	533.688	467.173	328.682	197.369							forward	1.305	0.61	1.79	1.295	0.67	0.105
A_09_P031206	Euchromatic gene	5928.42	2965.09	110.834	55.6681	60.0586	3819.94							forward	0.985	-0.515	-4.56	-5.6	-5.435	-0.17
A_09_P031211	Euchromatic gene	6.29485	26.9535	327.189	1909.38	4289.93	5018.06							forward	-8.365	-6.195	-2.635	-0.525	0.495	0.835
A_09_P031236	Euchromatic gene	3124.78	4834.84	2920.79	3125.26	3002.99	3630.4							forward	-0.09	0.145	-0.19	-0.035	-0.06	-0.025
A_09_P031261	Euchromatic gene	3913.12	408.016	886.223	1964.39	3117.49	2776.8							forward	0.555	-2.7	-1.515	-0.595	-0.03	-0.3
A_09_P031276	Euchromatic gene	886.212	2184.83	2615.39	1706.24	1583.36	753.88							forward	-0.145	0.9	1.23	0.5	0.385	-0.53
A_09_P031286	Euchromatic gene	27.6099	18.2703	26.5534	10.8211	10.9895	21.1272							forward	2.675	2.045	2.435	-3	-3	2.29
A_09_P031306	Euchromatic gene	1387.21	460.659	1087.52	1439.79	1592.49	2264.1							forward	-0.59	-2.01	-0.96	-0.83	-0.81	-0.105
A_09_P031331	Euchromatic gene	20509.1	36085.6	41648.7	47327.8	46944.7	32040.8							forward	0.015	0.22	0.205	0.29	0.155	-1.045
A_09_P031361	Euchromatic gene	1122.5	684.339	515.657	595.494	678.296	785.019							forward	1.17	0.295	0.075	0.09	0.245	0.205
A_09_P031376	Euchromatic gene	4341.66	1719.77	337.448	913.174	2347.37	628.077							forward	1.005	-0.53	-2.51	-1.165	0	-1.985
A_09_P031416	Euchromatic gene	475.381	935.915	1051.98	1174.28	1226.01	612.672							forward	-0.18	0.565	0.785	1.05	1.045	-0.215
A_09_P031466	Euchromatic gene	3.00253	1.87051	2.81498	0	0	0							forward	-3	-3	-3	-3	-3	-3
A_09_P031486	Euchromatic gene	19.1916	30.9592	24.4004	42.5653	25.6667	38458.1							forward	-7.98	-7.44	-7.82	-7.4	-7.945	2.07
A_09_P031491	Euchromatic gene	4.78466	11.2211	50.8422	39.9753	72.7679	52.4765							forward	-6.07	-4.86	-2.57	-3.165	-2.165	-3.52
A_09_P031521	Euchromatic gene	1364.06	2892.99	4161.55	5396.95	5703.3	833.8							forward	-1.31	-0.465	0.01	0.08	0.18	-2.145
A_09_P031541	Euchromatic gene	2218.58	1954.18	1939.04	1870.24	1794.36	1115.74							forward	0.175	-0.23	0.065	-0.155	-0.175	-0.86
A_09_P031556	Euchromatic gene	16.2825	21.8989	35.4422	62.2804	39.134	511.878							forward	-2.625	-2.845	-2.41	-2.075	-2.845	1.03
A_09_P031566	Euchromatic gene	3.13038	0	0	0.330234	2.85876	72.8908							forward	-3	-3	-3	-3	-3	3.88
A_09_P031616	Euchromatic gene	1704.06	2459.7	1873.53	2415.67	1859.76	668.413							forward	0.455	0.66	0.65	0.69	0.35	-0.925
A_09_P031691	Euchromatic gene	2.05594	3.09781	4.28419	6.27114	0.130871	6.65673							forward	-1.87	-2.51	-3	-1.735	-2.25	-3
A_09_P031696	Euchromatic gene	10.231	7.66469	6.49724	9.29829	4.8603	16.5662							forward	-3	-0.815	-1.15	-0.9	-1.96	1.2
A_09_P031701	Euchromatic gene	3.65521	1.64755	2.28658	10.8901	4.76847	21.4716							forward	-3	-3	-3	-3	-1.4	1.735
A_09_P031706	Euchromatic gene	4498.78	1774.8	7317.7	2515.54	1070.82	3352.37							forward	1.13	-0.3	1.49	0.205	-0.77	0.3
A_09_P031711	Euchromatic gene	230.182	243.845	362.107	261.435	136.813	64.8874							forward	1.635	2.015	1.495	0.965	-0.14	-1.965
A_09_P031731	Euchromatic gene	170.562	484.519	1101.24	1331.44	1722.19	1481.95							forward	-1.805	-0.795	0.56	0.715	0.97	0.65
A_09_P031736	Euchromatic gene	3697.24	6751.12	6535.41	7575.41	7081.85	2761.02							forward	-0.28	0.015	-0.055	0.17	0.085	-1.34
A_09_P031806	Euchromatic gene	3878.8	8416.73	13201	12506.7	8325.96	1787.97							forward	-0.295	0.335	1.02	0.79	0.22	-1.74
A_09_P031836	Euchromatic gene	4761.25	2549.43	1487.66	4122.72	6636.32	415.801							forward	0.565	-0.765	-1.205	0.215	0.78	-3.33
A_09_P031936	Euchromatic gene	10761.6	4373.36	3101.29	4058.88	3846.13	531.853							forward	1.16	-0.9	-1.245	-0.945	-1.125	-3.91
A_09_P031941	Euchromatic gene	3.68703	0	8.9295	115.325	279.45	22.3884							forward	-4.895	-5.655	-3.64	0.25	1.475	-2.46
A_09_P031951	Euchromatic gene	3654.55	6382.81	5952.76	5573.69	4727.56	4897.08							forward	-0.465	-0.035	-0.16	-0.335	-0.6	-0.465
A_09_P031961	Euchromatic gene	406.359	1414.41	3297.99	2947.68	2272.82	1322.74							forward	-1.115	0.355	1.39	1.025	0.71	0.045
A_09_P031981	Euchromatic gene	342.646	694.672	76.1699	73.7845	98.0841	152.958							forward	2.055	2.35	-0.735	-1.145	-0.975	-0.765
A_09_P032046	Euchromatic gene	3894.66	708.44	303.76	358.612	281.655	5392.6							forward	1.275	-1.165	-2.085	-2.105	-2.435	1.46
A_09_P032096	Euchromatic gene	3951.62	2120.79	1498.24	3994.47	7867.4	3438.18							forward	-0.245	-1.65	-1.855	-0.715	0.195	-0.905
A_09_P032136	Euchromatic gene	0.484754	10.0842	9.63774	14.0405	9.87057	168.032							forward	-3.805	-3.675	-2.315	-2.515	-3.44	1.895
A_09_P032151	Euchromatic gene	5363.63	8134.08	6068.08	4764.57	4270.14	1876.55							forward	0.295	0.41	0.04	-0.345	-0.565	-1.605
A_09_P032201	Euchromatic gene	2937.77	360.587	292.325	356.259	478.456	6599.41							forward	-0.2	-3.13	-3.305	-3.07	-2.795	0.55
A_09_P032206	Euchromatic gene	232.906	524.551	1028.49	2242.04	1677.72	351.06							forward	-0.66	-0.065	1.095	1.355	1.15	-0.61
A_09_P032211	Euchromatic gene	4300.96	7517.58	8199.08	9461.78	9081.23	8592.69							forward	-0.21	0.23	0.315	0.45	0.355	0.34
A_09_P032231	Euchromatic gene	16.6696	20.9345	15.5419	79.9007	241.966	1180.23							forward	-3.86	-4.415	-4.53	-2.555	-0.835	1.315
A_09_P032241	Euchromatic gene	2867.04	1518	530.877	389.009	324.481	13653.9							forward	0.09	-1.005	-2.41	-2.58	-2.915	1.53
A_09_P032246	Euchromatic gene	68.0946	441.028	1171.5	1144.18	1141.77	6657.76							forward	-3.865	-1.745	-0.215	-0.49	-0.58	1.995
A_09_P032261	Euchromatic gene	5.27434	27.339	23.4591	11.6265	12.6749	3.41315							forward	-3	2.63	1.89	-3	0.29	-3
A_09_P032266	Euchromatic gene	224.546	297.054	393.931	306.235	351.197	1929.23							forward	0.11	0.14	0.065	-0.47	-0.31	1.755
A_09_P032276	Euchromatic gene	2.35163	1.3365	3.04251	0	1.2763	1.12836							forward	-3	-3	-3	-3	-3	-3
A_09_P032346	Euchromatic gene	86.2728	106.243	63.9697	69.1213	43.7426	6843.5							forward	-2.475	-2.73	-3.38	-3.535	-4.455	2.845
A_09_P032351	Euchromatic gene	4868.25	9667.79	10965	11418.5	8850.34	20306.5							forward	-0.3	0.24	0.4	0.36	0.07	1.06
A_09_P032356	Euchromatic gene	5.45652	5.50166	5.10021	2.57684	7.22219	2002.96							forward	-4.65	-5.645	-5.27	-5.61	-5.77	4.31
A_09_P032361	Euchromatic gene	2.57468	26.3545	4.59066	0.115251	2.14148	246.244							forward	-5.1	-2.215	-4.105	-5.76	-6.17	1.165
A_09_P032391	Euchromatic gene	6947.09	4169.85	3362.85	4480.18	5006.44	3724.94							forward	0.625	-0.615	-0.845	-0.57	-0.46	-0.815
A_09_P032396	Euchromatic gene	5060.47	1174.94	36.9827	22.0756	21.1117	852.067							forward	1.295	-1.08	-6.025	-7.11	-6.775	-1.615
A_09_P032416	Euchromatic gene	692.859	1780.56	1910.79	1768.27	1900.84	191.224							forward	0.135	1.015	1.475	1.355	1.295	-2.2
A_09_P032421	Euchromatic gene	1596.36	675.998	257.779	656.875	1730.04	2234.8							forward	0.375	-0.92	-2.03	-0.8	0.415	0.62
A_09_P032426	Euchromatic gene	101.84	196.861	208.677	299.237	420.319	4404.11							forward	-0.58	-0.315	-0.36	0.25	0.655	3.61
A_09_P032471	Euchromatic gene	2253.62	2626.23	1012.09	568.418	423.834	5093.61							forward	0.18	0.155	-1.19	-1.92	-2.285	0.815
A_09_P032486	Euchromatic gene	1608.41	391.414	1385.36	2015.93	2492.96	572.808							forward	0.735	-1.055	0.485	0.78	1.195	-1.085
A_09_P032496	Euchromatic gene	29646.2	45457.5	58743.3	56429.4	64753	125871							forward	-0.105	-0.22	-0.37	-0.515	-0.39	-0.015
A_09_P032521	Euchromatic gene	832.062	140.992	139.913	163.052	184.433	391.538							forward	1.93	-0.75	-0.705	-0.49	-0.36	0.415
A_09_P032616	Euchromatic gene	10.0142	34.2258	97.2225	244.257	474.754	4656.99							forward	-5.61	-4.52	-2.82	-1.63	-0.74	2.41
A_09_P032641	Euchromatic gene	6.38247	3.93598	6.01566	8.72069	21.1962	887.588							forward	-4.9	-5.85	-5.14	-4.895	-3.915	2.215
A_09_P032651	Euchromatic gene	4.2861	5.1487	8.90882	21.5256	9.6455	16704.5							forward	-3.23	-3.955	-2.32	-1.725	-2.32	5.525
A_09_P032716	Euchromatic gene	2545.08	2820.01	1079.96	2037.73	2787.42	355.888							forward	0.235	0.16	-0.83	-0.095	0.35	-2.785
A_09_P032751	Euchromatic gene	3033.57	1803.25	2360.83	2881.94	3394.53	1557.89							forward	-0.035	-1.085	-0.42	-0.335	-0.125	-1.295
A_09_P032756	Euchromatic gene	1382.83	1372.91	494.477	542.596	491.345	1909.06							forward	0.41	0.205	-1.025	-0.825	-0.925	0.575
A_09_P032786	Euchromatic gene	3930.54	5832.13	4861.96	5701.98	5602.65	4678.11							forward	-0.07	0.01	-0.14	0.02	-0.055	-0.315
A_09_P032796	Euchromatic gene	179.08	155.252	49.7607	62.3643	69.972	10.8489							forward	2.235	1.11	0.18	0.165	0.365	-2.815
A_09_P032816	Euchromatic gene	8597.45	14200.4	14091.7	13395.9	13425.4	43439.5							forward	-0.555	-0.44	-0.575	-0.575	-0.655	0.56
A_09_P032821	Euchromatic gene	3765.74	948.512	2181.78	3418.6	2478.07	247.451							forward	0.45	-1.7	-0.285	0.025	-0.325	-3.59
A_09_P032826	Euchromatic gene	1075.41	915.339	127.64	363.599	1886.42	6756.78							forward	-1.77	-2.275	-4.36	-3.115	-1.075	0.61
A_09_P032831	Euchromatic gene	5154.72	8693.2	8844.39	10065.9	8083.11	16524.8							forward	-0.615	-0.4	-0.09	-0.045	-0.29	0.495
A_09_P032846	Euchromatic gene	8050.26	12833	19109.6	21655.9	21876.9	19359.8							forward	-0.49	-0.13	0.07	0.2	0.16	-0.445
A_09_P032866	Euchromatic gene	138.219	270.604	405.182	694.526	642.658	44.0652							forward	0.82	1.265	1.78	2.29	2.11	-1.91
A_09_P032876	Euchromatic gene	588.302	1252.22	2774.4	5434.8	5323.13	17815.8							forward	-2.54	-1.545	-0.435	0.475	0.47	2.01
A_09_P032901	Euchromatic gene	2064.28	155.72	543.159	869.88	1250.53	733.104							forward	0.985	-2.62	-0.89	-0.42	-0.13	-0.975
A_09_P032911	Euchromatic gene	8664.9	12614.7	3966.67	1940.92	1899.19	1334.74							forward	0.89	0.81	-0.87	-1.715	-1.795	-2.61
A_09_P032916	Euchromatic gene	1663.5	3426.3	8105.48	5481	5476.84	3363.05							forward	-0.35	0.385	1.455	0.99	0.905	0.085
A_09_P032921	Euchromatic gene	5564.25	2685.89	1532.35	2808.11	3401.56	318.494							forward	0.845	-0.655	-1.38	-0.655	-0.48	-3.835
A_09_P032936	Euchromatic gene	335.097	629.926	679.282	1444.8	1724.63	591.264							forward	0.395	0.745	0.83	1.63	1.775	0.2
A_09_P032941	Euchromatic gene	4454.8	6537.49	4942.86	4249.12	5568.77	4093.8							forward	-0.385	-0.26	-0.835	-1.005	-0.675	-1.205
A_09_P033036	Euchromatic gene	4325.18	9341.88	7496.57	6156.54	7302.24	1429.83							forward	-0.17	0.34	0.27	0.08	0.215	-2.02
A_09_P033096	Euchromatic gene	15878.9	25691	40817.3	54294.4	62348.7	3436.34							forward	0.04	0.365	0.75	1.015	1.22	-3.655
A_09_P033201	Euchromatic gene	15.7133	12.7533	6.84068	10.1139	15.0736	25.8993							forward	-0.415	-1.81	-1.855	-1.695	-2.045	-0.15
A_09_P033206	Euchromatic gene	6.78719	19.0684	6.14967	1.73629	3.32876	10.578							forward	-3	0.295	-3	-3	-3	0.275
A_09_P033226	Euchromatic gene	7.76464	5.85724	6.34685	5.88385	19.9098	12.2248							forward	-0.595	-1.715	-1.895	-2.595	-1.635	-0.51
A_09_P041066	Euchromatic gene	2.6177	19.8378	63.453	356.026	1332.43	1434.13							forward	-7.955	-5.605	-3.73	-1.465	0.26	0.29
A_09_P041086	Euchromatic gene	1213.95	338.742	90.6707	170.438	199.668	68.6295							forward	2.26	0.205	-1.395	-1.05	-0.87	-2.815
A_09_P041166	Euchromatic gene	1677.63	888.147	548.07	470.888	399.101	1832.64							forward	0.615	-0.37	-0.965	-1.395	-1.685	0.535
A_09_P041171	Euchromatic gene	235.898	241.692	67.3584	48.4887	54.3296	813.261							forward	0.725	-0.05	-1.52	-2.305	-2.295	1.495
A_09_P041176	Euchromatic gene	692.692	1024.66	676.212	453.659	298.459	704.988							forward	0.085	0.415	0.02	-0.86	-1.435	-0.24
A_09_P041186	Euchromatic gene	30.1244	30.0227	22.505	29.9972	90.1701	379.53							forward	-1.715	-2.55	-3.04	-2.83	-1.275	0.905
A_09_P041193	Euchromatic gene	16043.7	1210.17	474.047	517.941	540.625	133159							forward	0.73	-4.18	-4.895	-4.675	-4.705	3.31
A_09_P041201	Euchromatic gene	10.9973	18.7407	18.485	29.2137	94.0138	436.847							forward	-3.72	-4.21	-4.46	-3.715	-2.045	0.295
A_09_P041226	Euchromatic gene	59.0748	88.6931	383.806	1849.32	1997.48	349.967							forward	-5.765	-5.215	-3.315	-1.54	-1.485	-3.865
A_09_P041291	Euchromatic gene	249.152	351.429	607.542	1537.88	2045.93	180.932							forward	-0.57	-0.4	0.665	1.135	1.465	-1.595
A_09_P041316	Euchromatic gene	17001.2	4328.29	531.594	350.819	290.522	916.105							forward	1.425	-1.795	-4.465	-4.82	-5.16	-4.015
A_09_P041341	Euchromatic gene	0	10.9397	3.27668	7.43675	9.34168	479.271							forward	-4.15	-2.76	-4.155	-5.035	-5.515	3.01
A_09_P041376	Euchromatic gene	1185.84	2206	1134.54	567.171	417.109	62.3191							forward	1.095	1.735	1.225	-0.01	-0.455	-3.375
A_09_P041396	Euchromatic gene	20.5097	19.5241	3.45411	10.9458	13.1003	21.6671							forward	-1.055	-2.305	-4.11	-2.85	-3.425	-1.845
A_09_P041441	Euchromatic gene	63.5754	5643.08	10765.8	11164.3	13551	97.5702							forward	-5.035	0.52	1.57	1.53	1.86	-5.355
A_09_P041451	Euchromatic gene	28588.7	1729.58	423.676	297.327	238.057	282.98							forward	1.875	-3.925	-5.175	-5.7	-6.04	-6.25
A_09_P041456	Euchromatic gene	3279.76	3688.03	304.121	172.766	106.166	1817.3							forward	0.755	0.5	-2.35	-3.08	-3.84	-0.405
A_09_P041506	Euchromatic gene	43.0278	17454.4	6893.64	237.198	46.0009	22.924							forward	-4.545	3.045	1.635	-2.765	-5.055	-7.23
A_09_P041511	Euchromatic gene	1302.43	1797.56	234.285	114.083	124.852	173.46							forward	1.445	1.7	-0.88	-2.01	-1.945	-1.99
A_09_P041516	Euchromatic gene	1020.67	546.515	1671.86	5015.05	9296.2	3729.01							forward	-1.705	-2.495	-1.045	0.175	1.04	-0.13
A_09_P041526	Euchromatic gene	2936.57	4982.9	1974.25	954.049	1168.18	1012.06							forward	0.51	0.985	0.14	-0.78	-0.505	-0.96
A_09_P041561	Euchromatic gene	7905.42	5354.7	568.619	374.273	554.987	1449.11							forward	1.085	-0.15	-2.815	-3.4	-2.955	-1.835
A_09_P041571	Euchromatic gene	2548.36	1728.14	186.05	126.148	111.448	1609.27							forward	0.295	-0.46	-3.15	-4.01	-4.085	-0.505
A_09_P041601	Euchromatic gene	357.446	997.229	844.32	770.484	706.072	536.445							forward	0.105	0.985	1.03	0.825	0.685	0.155
A_09_P041646	Euchromatic gene	127.344	134.77	420.132	555.365	498.813	353.151							forward	-0.085	-0.59	1.19	1.27	1.04	0.515
A_09_P041651	Euchromatic gene	30.1998	41.3446	42.4963	45.1541	77.0041	343.038							forward	-1.85	-1.65	-1.505	-1.59	-1.035	1.135
A_09_P041666	Euchromatic gene	355.066	554.081	610.614	764.773	798.029	59540.4							forward	-4.71	-4.04	-4.02	-3.67	-3.655	2.105
A_09_P041681	Euchromatic gene	713.89	1829.87	2094.65	2617.25	2772.56	936.023							forward	-0.24	0.725	1.235	1.24	1.33	-0.165
A_09_P041686	Euchromatic gene	1067.21	2705.71	1688.52	1569.63	1879.18	474.708							forward	-0.3	0.545	0.37	0.6	0.695	-1.41
A_09_P041691	Euchromatic gene	10831.6	18848.5	28132.5	33817.4	31371.8	15209.1							forward	-0.325	-0.12	0.22	0.21	0.1	-1.44
A_09_P041706	Euchromatic gene	738.823	1493.19	558.807	110.782	158.135	161.814							forward	0.215	0.98	0.03	-2.275	-1.815	-2.35
A_09_P041711	Euchromatic gene	6673.74	11623.5	12686.7	11362.8	6967.26	8074.27							forward	0.1	0.42	0.465	0.3	-0.38	-0.35
A_09_P041721	Euchromatic gene	3.72955	18.0693	184.461	624.859	1271.75	74.8604							forward	-5.095	-3.655	0.16	1.49	2.47	-1.8
A_09_P041746	Euchromatic gene	1456.41	3176.61	3662.34	3133.64	2391.22	916.948							forward	-0.04	0.815	1.11	0.8	0.425	-0.91
A_09_P041761	Euchromatic gene	6812.48	169.104	238.033	839.331	1697.91	48.4281							forward	1.7	-3.335	-2.95	-1.405	-0.585	-5.91
A_09_P041821	Euchromatic gene	2884.2	5644.57	7558.88	9919.82	11590	15935.2							forward	-1.095	-0.63	-0.36	-0.085	0.17	0.615
A_09_P041831	Euchromatic gene	20.8558	39.6258	62.6284	105.107	120.633	21.9673							forward	-0.725	0	1.17	1.495	1.685	-0.65
A_09_P041856	Euchromatic gene	23638.6	22353	5334.08	3291.11	2787.23	3109.29							forward	1.35	0.07	-2.26	-2.975	-3.21	-3.23
A_09_P041881	Euchromatic gene	12.1442	17.6838	30.7671	438.513	1241.95	7412.12							forward	-5.025	-5.095	-4.075	-0.5	0.86	3.345
A_09_P041886	Euchromatic gene	6.86462	13.2527	10.5088	10.2443	17.2253	30.7455							forward	-2.445	-2.06	-1.475	-1.81	-1.76	-0.085
A_09_P041891	Euchromatic gene	7212.87	12540.9	17898.2	15578.9	9144.44	44329							forward	0.185	0.545	0.645	0.35	-0.44	1.615
A_09_P041896	Euchromatic gene	3.92341	104.381	821.401	2504.41	3114.61	217.29							forward	-7.23	-2.86	0.235	1.57	1.785	-2.185
A_09_P041911	Euchromatic gene	982.854	450.874	732.35	1118.18	1127.19	268.868							forward	0.39	-0.585	0.235	0.46	0.385	-1.57
A_09_P041926	Euchromatic gene	6.08452	10.159	9.34102	41.6618	18.3032	1431.3							forward	-5.62	-5.7	-6.175	-3.265	-4.53	2.025
A_09_P041946	Euchromatic gene	7.64614	10.6716	8.75767	12.1465	13.2462	554.307							forward	-3.425	-3.97	-3.7	-3.98	-4.815	2.25
A_09_P041991	Euchromatic gene	1961.32	245.551	43.4643	23.6194	18.015	825.41							forward	1.2	-1.49	-3.935	-5.245	-5.855	-0.125
A_09_P041996	Euchromatic gene	5.36009	5.19349	3.04547	5.34206	5.93352	76.168							forward	-2.98	-3.995	-4.435	-3.885	-4.215	1.135
A_09_P042011	Euchromatic gene	220.148	396.049	78.624	146.129	144.543	100.174							forward	1.32	1.58	-0.455	0.015	-0.13	-0.755
A_09_P042041	Euchromatic gene	15903.3	6928.73	6046.42	10775.2	17288.5	5554.93							forward	0.875	-1.285	-1.5	-0.835	-0.26	-1.795
A_09_P042056	Euchromatic gene	3.96583	1174.28	930.06	1373.37	1401.98	677.046							forward	-6.48	1.545	1.43	1.925	1.94	0.585
A_09_P042066	Euchromatic gene	4.03276	9.55895	128.03	1362.14	3752.51	572.477							forward	-7.805	-6.16	-2.77	0.365	1.595	-0.97
A_09_P042106	Euchromatic gene	1.78642	8.50275	10.1206	11.2758	26.7655	18.798							forward	-1.575	-3	-3	-0.455	0.955	1.535
A_09_P042151	Euchromatic gene	777.922	1548.01	2461.44	2783.42	2811.01	843.895							forward	-1.35	-0.415	0.3	0.49	0.49	-1.31
A_09_P042176	Euchromatic gene	25802.3	41414.4	55964.2	53670.4	59292.6	65599.7							forward	-0.23	-0.02	-0.015	-0.21	-0.215	-1
A_09_P042251	Euchromatic gene	30880.5	23418.1	3601.52	1948.02	1273.08	42392.1							forward	1.45	-0.5	-3.595	-4.41	-5.025	-0.395
A_09_P042261	Euchromatic gene	3816.98	1802.33	1963.34	3450.71	2896.25	114.856							forward	1.205	-0.125	0.21	0.485	0.25	-4.425
A_09_P042351	Euchromatic gene	1.31037	4.37418	4.00842	58.4377	45.8347	685.848							forward	-8.685	-9.015	-8.15	-4.84	-4.59	-1.095
A_09_P042361	Euchromatic gene	0	8.52412	2.67086	2.61102	0.58452	12.7545							forward	-3	-3	-3	-3	-3	-3
A_09_P042411	Euchromatic gene	4506.07	8194.9	3060.44	1155.93	1437.53	3555.29							forward	0.46	0.94	-0.27	-1.385	-1.245	-0.105
A_09_P042446	Euchromatic gene	13.3304	1.91492	6.13076	5.44519	6.45901	3.92392							forward	-3	-3	-3	-3	-3	-3
A_09_P042451	Euchromatic gene	2954.61	3367.85	1449.02	1583.65	1737.63	1016.02							forward	0.45	0.245	-0.515	-0.51	-0.425	-1.33
A_09_P042461	Euchromatic gene	14.7377	56.3611	404.319	1566.09	3172.02	493.534							forward	-5.235	-3.995	-1.175	0.485	1.305	-1.315
A_09_P042486	Euchromatic gene	597.395	453.23	408.374	496.911	550.601	71.5883							forward	1.5	0.76	0.91	1.045	0.985	-2.29
A_09_P042501	Euchromatic gene	4069.89	9414.32	12732	14995.1	13897	426.108							forward	-0.275	0.475	0.93	0.94	0.8	-3.865
A_09_P042511	Euchromatic gene	4.75464	3.52173	21.2031	128.394	182.631	313.607							forward	-4.155	-5.455	-2.545	0.06	0.54	1.225
A_09_P042561	Euchromatic gene	270.147	364.842	384.742	463.483	429.376	38534.2							forward	-4.63	-4.12	-4.09	-3.885	-4.005	1.865
A_09_P042591	Euchromatic gene	17672.8	591.286	161.022	152.195	114.463	18594.4							forward	1.625	-4.175	-5.52	-5.76	-6.29	0.515
A_09_P042596	Euchromatic gene	1182.85	1096.74	141.82	171.955	239.477	2918.43							forward	0.96	0.94	-1.82	-1.765	-1.395	2.025
A_09_P042611	Euchromatic gene	748.684	1095.88	59.2033	63.1946	53.906	280.47							forward	1.53	1.79	-2.44	-2.57	-2.925	-0.615
A_09_P042626	Euchromatic gene	9135.75	6946.91	2537.76	986.227	369.042	4178.06							forward	0.485	-0.665	-1.885	-3.065	-4.515	-1.31
A_09_P042671	Euchromatic gene	5.18417	3.85125	3.50996	26.7571	32.5089	167.947							forward	-4.775	-5.865	-5.63	-3.24	-2.725	-0.095
A_09_P042676	Euchromatic gene	124.255	40682.6	18941.6	7983.74	4946.01	238.931							forward	-5.55	2.78	1.24	-0.09	-0.815	-5.1
A_09_P042716	Euchromatic gene	2767.16	3920.12	3398.38	3277.66	2592.29	1104.96							forward	0.235	0.365	0.5	0.435	0.16	-1.115
A_09_P042946	Euchromatic gene	647.012	1779.18	2694.72	2825.69	2366.58	2456.13							forward	-0.45	0.635	1.48	1.375	1.16	1.175
A_09_P042956	Euchromatic gene	2682.57	5941.26	2336.43	1451.83	1816.74	420.445							forward	0.005	0.97	-0.125	-0.74	-0.43	-2.74
A_09_P043091	Euchromatic gene	5130.33	7614.2	1873.61	2263.9	3666.02	3116.87							forward	0.545	0.77	-1.31	-0.96	-0.38	-0.905
A_09_P043096	Euchromatic gene	22497	36413.2	51255.1	52524.1	61055.4	87441.9							forward	-0.045	0.075	0.07	0.075	0.245	0.16
A_09_P043101	Euchromatic gene	3658.78	3074.22	3587.77	4996.06	4812.5	6567.64							forward	-0.25	-0.89	-0.46	-0.28	-0.355	0.21
A_09_P043106	Euchromatic gene	2293.78	766.864	2961.44	3218.49	2854.28	1155.79							forward	0.27	-1.34	0.6	0.635	0.49	-0.925
A_09_P043111	Euchromatic gene	98.0555	7.79811	5.5148	16.3649	17.4451	28.4182							forward	2.805	-2.13	-2.375	-0.305	-1.045	1.12
A_09_P043116	Euchromatic gene	1613.14	1735.94	1290.28	1863.61	1642.01	477.339							forward	0.195	0.31	0.06	0.485	0.25	-1.58
A_09_P043121	Euchromatic gene	2390.89	5101.65	7077.95	2844.65	1929.06	587.526							forward	0.195	1.01	1.46	0.49	-0.115	-2.06
A_09_P043126	Euchromatic gene	97.2975	145.148	312.551	300.664	228.293	31.6365							forward	1.535	1.7	2.62	2.4	1.93	-1.595
A_09_P043131	Euchromatic gene	4628.58	9126.16	4985.22	3075.32	2937.88	3493.32							forward	0.035	0.57	-0.53	-1.125	-1.23	-1.185
A_09_P043136	Euchromatic gene	1176.63	1723.02	1087.28	887.638	752.075	155.442							forward	0.68	1.055	0.555	0.21	-0.035	-2.7
A_09_P043141	Euchromatic gene	33.4784	1363.02	2305.28	3944.75	2745.18	823.506							forward	-4.275	0.265	1.05	1.76	1.315	-0.69
A_09_P043146	Euchromatic gene	3.65238	12.128	7.56537	625.667	2827.18	64.9836							forward	-7.365	-5.625	-6.14	0.34	2.32	-3.305
A_09_P043151	Euchromatic gene	1908.13	3685.62	5775.98	5053.84	4516.45	1251.13							forward	-0.35	0.365	1.14	0.905	0.605	-1.025
A_09_P043156	Euchromatic gene	17.8591	196.629	533.563	722.62	1035.49	191.257							forward	-3.21	-0.495	1.12	1.095	1.465	-1.05
A_09_P043161	Euchromatic gene	215.735	411.592	385.282	503.012	433.512	177.963							forward	0.44	0.8	0.74	0.53	0.195	-1.06
A_09_P043166	Euchromatic gene	551.872	1247.05	1007.99	620.917	538.23	58.7854							forward	1.63	2.425	2.07	1.215	0.84	-2.685
A_09_P043171	Euchromatic gene	10.6858	9.15424	45.1014	101.202	125.835	1407.67							forward	-3.735	-4.88	-2.505	-1.355	-1.065	2.25
A_09_P043176	Euchromatic gene	0	4.28365	1.39704	0.570272	3.83808	8.06901							forward	-3	-3	-3	-3	-3	-3
A_09_P043181	Euchromatic gene	771.319	1940.96	5203.01	6345.77	8035.88	1910.02							forward	-1.495	-0.31	0.905	1.495	1.79	-0.515
A_09_P043186	Euchromatic gene	3542.8	5261.84	5103.21	4368.59	3482.72	2998.41							forward	-0.11	0.13	0.03	-0.155	-0.465	-0.675
A_09_P043191	Euchromatic gene	2690.06	1858.87	813.88	1235.94	1201.69	1853.24							forward	0.34	-0.37	-1.275	-0.915	-0.93	-0.52
A_09_P043196	Euchromatic gene	1859.9	3606.32	4021.31	4044.81	2936.91	739.722							forward	-0.82	-0.12	0.31	0.155	-0.23	-2.16
A_09_P043206	Euchromatic gene	12898	7420.23	1660.91	2455.9	3512.68	16044							forward	0.585	-1.09	-3.22	-2.635	-2.195	-0.365
A_09_P043211	Euchromatic gene	624.205	280.233	42.4773	63.3486	55.1409	400.681							forward	1.01	-0.275	-2.915	-2.75	-3.03	-0.19
A_09_P043216	Euchromatic gene	3515.86	5250.23	1585.85	1680.39	2099.61	2972.8							forward	0.125	0.235	-0.98	-0.94	-0.645	-0.295
A_09_P043226	Euchromatic gene	221.784	1174.87	4820.79	8447.82	9125.16	1028.87							forward	-3.14	-1.145	0.92	1.52	1.585	-1.295
A_09_P043296	Euchromatic gene	4865.58	5723.05	643.41	1187.23	1505.59	3537.23							forward	0.5	0.085	-2.41	-1.855	-1.535	-0.325
A_09_P043301	Euchromatic gene	703.454	2393.43	3974.09	7163.46	9966.46	1793.09							forward	-2.985	-1.695	-0.42	0.145	0.575	-1.74
A_09_P043311	Euchromatic gene	69.4693	258.598	1112.09	3004.06	5613.84	4765.81							forward	-6.325	-4.785	-2.53	-1.435	-0.62	-0.89
A_09_P043346	Euchromatic gene	26.4227	1232.84	5796.26	12146.4	13571.7	1322.7							forward	-6.91	-2.34	0.06	1.085	1.255	-2.11
A_09_P043366	Euchromatic gene	1.91954	3.86731	1.98484	6.41432	1.48553	0.82094							forward	-3	-3	-3	-3	-3	-3
A_09_P043441	Euchromatic gene	25983.5	43401.6	68825.5	67768.1	80203.2	117378							forward	-0.02	0.02	0.06	0.09	0	-0.02
A_09_P043511	Euchromatic gene	2986.12	5045.47	1036.53	514.31	620.534	197.204							forward	0.71	1.08	-0.815	-1.645	-1.455	-3.665
A_09_P043516	Euchromatic gene	1179.38	1893.65	78.5022	33.7753	16.7186	26.2081							forward	1.47	1.92	-2.605	-3.885	-5.49	-4.945
A_09_P043576	Euchromatic gene	75.7346	102.906	123.356	139.333	125.007	52933.1							forward	-6.67	-6.025	-5.94	-5.775	-6.1	2.215
A_09_P043701	Euchromatic gene	0.700672	1.99527	1.6055	0	2.00699	1.43316							forward	-3	-3	-3	-3	-3	-3
A_09_P043706	Euchromatic gene	1.73876	3.9347	0	2.10312	2.73026	1.39796							forward	-3	-3	-3	-3	-3	-3
A_09_P043761	Euchromatic gene	1249.05	348.119	331.154	710.14	720.279	187.026							forward	1.25	-0.335	-0.48	0.16	0.145	-1.955
A_09_P043836	Euchromatic gene	0.226151	307.245	1316.02	992.054	285.189	25.9379							forward	-5.28	1.445	3.875	3.27	1.5	-2.64
A_09_P043851	Euchromatic gene	9.58307	38.0425	36.9537	38.5154	17.2874	14.8331							forward	-1.625	1.58	1.615	0.935	-0.43	-0.34
A_09_P043861	Euchromatic gene	1.13414	1.28195	2.13159	2.58479	2.91727	14.2051							forward	-3	-3	-3	-1.57	-3	1.575
A_09_P043866	Euchromatic gene	3.80451	8.34959	5.51894	4.52046	8.8955	11.2043							forward	-3	-3	-3	-3	-1.46	-3
A_09_P043871	Euchromatic gene	3.10452	7.54585	1.7648	2.7906	10.4699	1.60264							forward	-3.595	-2.34	-4.855	-4.07	-3.615	-5.315
A_09_P043906	Euchromatic gene	2303.57	2016.44	1584.8	1070.64	1381.52	725.157							forward	0.62	0.15	0.355	-0.275	0.055	-1.095
A_09_P043911	Euchromatic gene	11.2761	3844.51	6444.42	4168.48	2810.2	550.793							forward	-6.11	1.265	2.31	1.565	1.07	-1.285
A_09_P043916	Euchromatic gene	1239.42	1929.12	2427.93	2676.94	2170.25	118.1							forward	0.28	0.785	1.06	1.21	0.845	-3.755
A_09_P043956	Euchromatic gene	616.112	674.154	41.094	179.727	124.252	629.75							forward	-0.025	-0.17	-4.07	-1.875	-2.51	-0.57
A_09_P044006	Euchromatic gene	0	30.317	84.8332	25.6374	9.46816	31.9437							forward	-3	1.605	3.35	0.855	-0.765	1.22
A_09_P044061	Euchromatic gene	8074.35	1131.18	600.983	1038.78	1201.48	10998.8							forward	0.86	-2.175	-2.63	-2.44	-2.475	0.51
A_09_P044086	Euchromatic gene	3207.61	4362.78	1248.46	1726.91	1812.51	65.0823							forward	0.62	0.81	-0.655	-0.195	-0.19	-5.49
A_09_P044221	Euchromatic gene	1627.94	3266.43	4479.8	3182.98	1820.54	1326.75							forward	0.27	1.055	1.325	0.94	0.345	-0.39
A_09_P044226	Euchromatic gene	1.87902	850.78	2109.7	429.63	79.2571	7.17381							forward	-5.32	2.64	4.14	1.52	-1.25	-5.21
A_09_P044246	Euchromatic gene	9863.02	17876.4	21393.6	13634.9	7749.74	4659.03							forward	0.365	0.65	0.735	-0.005	-0.76	-1.645
A_09_P044311	Euchromatic gene	4784.38	1777.66	119.006	70.1764	46.2353	208.906							forward	1.3	-0.36	-3.775	-4.67	-5.31	-3.615
A_09_P044356	Euchromatic gene	321.287	126.716	122.956	206.303	353.561	422.712							forward	0.98	-0.95	-0.74	-0.16	0.51	0.1
A_09_P044376	Euchromatic gene	6658.75	13603.5	7581.5	4351.75	3514.35	3215.45							forward	0.445	0.89	0.155	-0.885	-1.19	-1.13
A_09_P044406	Euchromatic gene	1.2981	4.57206	2.05544	10.2769	2.23709	28.7965							forward	-3	-2.59	-2.115	-0.67	-2.29	1.185
A_09_P044451	Euchromatic gene	144.629	5306.09	223.878	196.757	744.962	36.0039							forward	-1.645	2.24	-1.425	-1.865	-0.025	-5.045
A_09_P044476	Euchromatic gene	626.441	706.87	728.605	1076.58	1354.85	1783.86							forward	0.33	0.375	0.415	0.725	1.04	1.335
A_09_P044521	Euchromatic gene	79.3896	131.521	236.552	366.054	515.51	42.7569							forward	0.305	0.28	1.375	1.49	1.835	-1.75
A_09_P044531	Euchromatic gene	63.3599	13220.3	32645.4	44602.8	51960	300.367							forward	-8.1	-0.78	0.895	1.255	1.28	-6.17
A_09_P044586	Euchromatic gene	9734.38	18978.6	23690.6	31420.3	31716.1	945.484							forward	0.275	0.65	1.035	1.19	1.105	-3.705
A_09_P044636	Euchromatic gene	3.58329	0	0	1.68508	4.18842	3.33462							forward	-3	-3	-3	-3	-3	-3
A_09_P044696	Euchromatic gene	1.51042	1.03745	2.06651	2.5786	10.1199	24.6168							forward	-2.755	-3.05	-3.665	-2.815	-1.755	0.225
A_09_P044771	Euchromatic gene	51.1473	3080.18	7793.11	11135.6	12084.8	500.624							forward	-5.195	-0.105	1.23	1.585	1.645	-2.63
A_09_P044791	Euchromatic gene	1503.64	4253.63	8493.05	4325.64	3014.91	490.471							forward	0.11	1.275	2.25	1.27	0.775	-1.675
A_09_P044801	Euchromatic gene	22.6405	3777.13	4342.91	3490.88	4150.2	225.256							forward	-5.045	1.45	1.98	1.555	1.835	-2.56
A_09_P044851	Euchromatic gene	536.933	281.674	14.1602	16.1041	8.45036	64.3857							forward	1.83	0.33	-4.435	-5	-6.005	-2.06
A_09_P044856	Euchromatic gene	196.577	334.692	95.0563	25.696	4.99214	85.3015							forward	1.54	1.785	0.19	-2.275	-4.345	-0.6
A_09_P044971	Euchromatic gene	2195.07	333.811	259.262	333.535	469.879	233.213							forward	1.105	-1.4	-1.545	-1.21	-0.805	-2.305
A_09_P045041	Euchromatic gene	4.82138	6.28033	2.41544	2.98588	2.32566	49.8793							forward	-3	-3	-1.58	-3	-3	2.04
A_09_P045151	Euchromatic gene	3196.42	4347.47	1526.79	1138.84	1803.29	6787.6							forward	-0.02	0.225	-1.085	-1.485	-0.845	0.68
A_09_P045171	Euchromatic gene	573.936	72.7339	82.8218	282.858	657.969	211.797							forward	0.095	-2.865	-2.545	-1.2	-0.105	-1.85
A_09_P045216	Euchromatic gene	1510.91	3431.22	4733.97	3717.35	4000.32	214.855							forward	-0.41	0.385	0.78	0.495	0.61	-3.625
A_09_P045266	Euchromatic gene	4.76805	11.5863	13.8792	31.9922	31.5279	2077.41							forward	-5.745	-4.71	-3.53	-3.065	-3.08	3.595
A_09_P045286	Euchromatic gene	4264.39	2974.41	757.507	2322.22	6642.47	3380.54							forward	0.24	-0.865	-2.39	-0.885	0.435	-0.505
A_09_P045301	Euchromatic gene	174.89	121.588	97.5847	39.2323	26.8673	7957.68							forward	0.335	-0.97	-1.235	-2.825	-3.44	4.875
A_09_P045371	Euchromatic gene	32.8739	1648.93	4947.25	8714.43	9001.41	656.347							forward	-5.575	-0.675	0.775	1.28	1.425	-2.27
A_09_P045416	Euchromatic gene	1447.16	2793.86	2802.72	1204.93	909.136	367.836							forward	0.42	1.26	1.25	-0.225	-0.505	-1.67
A_09_P045571	Euchromatic gene	3651.86	5931.51	3857.97	2815.18	2626.71	316.588							forward	0.675	0.955	0.535	0.035	-0.03	-3.455
A_09_P045581	Euchromatic gene	1201.33	675.544	444.272	244.326	94.9734	518.161							forward	0.03	-0.675	-1.2	-2.23	-3.63	-1.43
A_09_P045626	Euchromatic gene	3969.44	1773.07	156.311	102.21	90.357	1316.18							forward	0.94	-0.555	-3.525	-3.78	-4.05	-0.975
A_09_P045701	Euchromatic gene	1256.89	2592.45	4418.98	2358.75	2790.76	2872.02							forward	-0.91	0.075	0.61	0.175	0.4	-0.07
A_09_P045726	Euchromatic gene	11.0682	13.3071	24.954	31.1596	25.348	10.5034							forward	-0.075	0.425	1.175	1.395	1.285	-0.54
A_09_P045756	Euchromatic gene	6.00057	0.68742	1.55224	4.12461	1.54685	174.068							forward	-2.405	-3.265	-3.46	-2.775	-3.05	3.445
A_09_P045811	Euchromatic gene	294.823	394.907	34.7631	90.529	100.966	95.3094							forward	1.535	0.86	-2	-0.745	-0.665	-1.31
A_09_P045886	Euchromatic gene	4.10776	10.3659	5.16452	1.4319	1.75888	6.52852							forward	-3	-3	-3	-3	-3	-3
A_09_P045896	Euchromatic gene	4.24316	12.0262	10.5183	14.6315	15.5259	15.3352							forward	-1.86	-1.345	-1.125	-1.285	-0.935	-0.98
A_09_P045941	Euchromatic gene	13.5681	42.0024	146.511	330.287	398.949	27.7354							forward	-2.675	-1.855	0.36	1.255	1.35	-3.165
A_09_P045976	Euchromatic gene	7.73092	1623.7	2945.94	2491.68	3243.35	943.905							forward	-6.35	0.735	1.755	1.335	1.6	-0.07
A_09_P046011	Euchromatic gene	0.687847	9.904	3.211	0	1.7574	27.5981							forward	-3	-1.855	-1.895	-2.015	-2.23	1.795
A_09_P046026	Euchromatic gene	4.05224	2.18334	0	2.24384	0	4.21031							forward	-3	-3	-3	-3	-3	-3
A_09_P046071	Euchromatic gene	0.62883	5.88335	0	5.43446	4.19724	4.72597							forward	-3	-3	-3	-3	-3	-3
A_09_P046081	Euchromatic gene	46.4146	27.7354	21.0304	14.679	11.7361	13.4462							forward	2.03	1.07	0.72	-1.35	-1.405	0.12
A_09_P046086	Euchromatic gene	46.4251	144.387	229.968	272.638	271.818	139.519							forward	-0.32	0.84	1.6	1.345	1.22	0.395
A_09_P046096	Euchromatic gene	3675.46	6838.62	8451.38	8306.65	5210.11	514.234							forward	-0.045	0.515	0.87	0.6	0.035	-2.965
A_09_P046206	Euchromatic gene	10.675	199.504	283.341	282.349	525.874	5473.16							forward	-4.91	-1.59	-0.81	-0.76	0.1	3.03
A_09_P046346	Euchromatic gene	0	3.90639	7.64909	2.61527	6.61931	1.01042							forward	-3	-3	-3	-3	-3	-3
A_09_P046351	Euchromatic gene	62.3183	17.5481	4.12768	4.52908	5.88455	128.58							forward	1.15	-1.29	-4.46	-3.475	-3.63	1.685
A_09_P046356	Euchromatic gene	4.84716	5.54782	1.6774	3.84116	1.35022	15.0379							forward	-3	-3	-3	-3	-3	1.095
A_09_P046371	Euchromatic gene	0	3.65861	3.71274	10.2663	1.7334	5.34257							forward	-3	-3	-3	-3	-3	-3
A_09_P046376	Euchromatic gene	1.19796	4.97105	1.15358	1.84604	2.25519	1.61762							forward	-3	-3	-3	-3	-3	-3
A_09_P046381	Euchromatic gene	2.35111	18.615	94.9847	202.001	102.444	20.3836							forward	-3.785	-2.695	1.245	1.43	0.39	-1.92
A_09_P046436	Euchromatic gene	3.42069	8.4788	5.47675	5.38102	9.46651	18.7866							forward	-2.025	-1.555	-0.71	-1.505	-0.53	0.635
A_09_P046461	Euchromatic gene	18.7128	8.58345	15.8849	13.3313	11.3514	13.6271							forward	-0.2	-1.77	-0.45	-1.525	-1.23	-1.235
A_09_P046476	Euchromatic gene	10.0864	4.06801	5.42947	5.10119	2.9776	75.2395							forward	-0.685	-2.16	-1.21	-1.46	-2.385	2.23
A_09_P046546	Euchromatic gene	4173.96	4409.88	9719.42	18952	27605.3	8252.65							forward	-1.305	-1.765	-0.66	0.64	1.145	-1.065
A_09_P046581	Euchromatic gene	169.531	145.194	161.987	244.31	211.571	136.386							forward	0.895	0.12	0.485	0.775	0.395	-0.365
A_09_P046791	Euchromatic gene	31.2722	136.797	291.588	424.823	346.002	45.4347							forward	-0.635	1.04	2.38	2.465	2.085	-0.98
A_09_P046821	Euchromatic gene	23.4217	878.108	1242.25	1371.11	1589.9	1469.4							forward	-4.1	0.32	0.82	0.545	0.73	0.86
A_09_P046831	Euchromatic gene	22656.2	15127.2	2152.28	1481.54	1033.52	27460.1							forward	1.04	-0.69	-3.445	-3.98	-4.44	-0.2
A_09_P046841	Euchromatic gene	6.51039	5.58244	3.49783	6.68187	31.4982	289.599							forward	-3.075	-3.96	-4.095	-3.39	-0.2	3.505
A_09_P046876	Euchromatic gene	0.202856	0.330662	2.63031	7.99392	3.49094	3.95985							forward	-3	-3	-3	-3	-3	-3
A_09_P046921	Euchromatic gene	0	1.27294	0.625054	1.51744	3.9614	0							forward	-3	-3	-3	-3	-3	-3
A_09_P046956	Euchromatic gene	3678.95	6375.44	1404.49	651.831	825.968	235.505							forward	0.65	1.015	-0.855	-1.91	-1.63	-3.745
A_09_P046966	Euchromatic gene	99.0216	122.834	234.498	692.097	2260.78	5057.02							forward	-4.4	-4.22	-3.365	-1.965	-0.48	0.485
A_09_P046976	Euchromatic gene	2.28585	2.37272	1.74437	0.182384	2.59036	18.2403							forward	-3	-3	-3	-3	-3	2.06
A_09_P047006	Euchromatic gene	46.1455	22.8424	25.037	38.2859	20.188	2.48396							forward	3.04	1.25	1.58	2.175	0.59	-2.405
A_09_P047196	Euchromatic gene	655.866	1531.47	2036.53	2322.29	1791.06	564.642							forward	0.06	0.97	1.43	1.265	0.93	-0.775
A_09_P047281	Euchromatic gene	214.363	270.084	56.367	23.2546	15.7809	8.42357							forward	2.875	2.86	0.465	-1.555	-2.385	-3.035
A_09_P047286	Euchromatic gene	75.005	32.5896	7.78063	22.3186	102.712	117.634							forward	0.775	-0.885	-3.43	-1.95	0.515	0.855
A_09_P047366	Euchromatic gene	5.79896	4.60125	4.27087	3.08872	3.23271	26.7098							forward	-1.95	-1.82	-2.22	-3	-1.465	1.28
A_09_P047376	Euchromatic gene	20.0182	305.43	427.471	177.317	167.091	463.35							forward	-2.185	1.13	1.995	0.55	0.295	1.67
A_09_P047386	Euchromatic gene	1.81807	5.39152	0.0250007	4.10182	6.60196	15.1226							forward	-1.285	-1.815	-2.145	-3	-0.57	0.195
A_09_P047431	Euchromatic gene	2.01527	3.9946	1.54905	4.56453	7.31607	3.52743							forward	-3	-3	-3	-3	-3	-3
A_09_P047466	Euchromatic gene	4.12332	4.69757	1.78116	3.81875	6.08666	28.9221							forward	-3	-3	-3	-3	-3	1.95
A_09_P047576	Euchromatic gene	9.19789	4.43662	8.17642	4.70293	6.2654	8.19524							forward	-3	-3	-3	-3	-3	-3
A_09_P047591	Euchromatic gene	8.47607	7.18403	8.87793	10.8816	8.56528	71.1155							forward	-2.205	-3.13	-3.195	-2.845	-3.85	0.535
A_09_P047601	Euchromatic gene	12.5912	11.4207	7.40996	6.19544	7.02862	0.556341							forward	-3	-3	-3	-0.625	-3	-3
A_09_P047646	Euchromatic gene	6.41728	2.99019	2.21296	5.46137	5.8517	424.982							forward	-3.18	-3.98	-4.125	-4.23	-4.73	3.77
A_09_P047666	Euchromatic gene	0	0	1.20177	3.76858	0	2.76959							forward	-3	-3	-3	-3	-3	-3
A_09_P047751	Euchromatic gene	2.243	0.548018	1.84124	1.07107	0.630518	1.77038							forward	-3	-3	-3	-3	-3	-3
A_09_P047756	Euchromatic gene	74.5745	12.9478	1.96897	3.67112	8.47845	5.4354							forward	1.875	-1.905	-2.86	-2.62	-3.175	-2.43
A_09_P047781	Euchromatic gene	4.28658	3.63492	5.47216	7.95136	11.8011	3.52718							forward	-3	-3	-3	-3	-3	-3
A_09_P047846	Euchromatic gene	2.71019	6.0625	4.65044	0.889742	2.35555	1.01002							forward	-3	-3	-3	-3	-3	-3
A_09_P047851	Euchromatic gene	11.5159	469.656	674.15	698.012	672.33	1062.68							forward	-4.73	0.49	1.18	0.97	0.87	1.495
A_09_P047856	Euchromatic gene	262.123	811.262	2211.64	1116.62	354.574	83.5347							forward	1.23	2.27	3.24	2.36	0.63	-1.875
A_09_P047881	Euchromatic gene	0	0	0	0	2.64424	3.60591							forward	-3	-3	-3	-3	-3	-3
A_09_P047911	Euchromatic gene	127.129	147.071	29.6554	83.262	62.5208	258.976							forward	-0.555	-1.155	-3.725	-1.94	-2.495	-0.71
A_09_P047976	Euchromatic gene	44.6019	37.0837	21.5706	25.7833	9.3783	3.74183							forward	2.375	1.88	1.305	1.265	-0.53	-2.26
A_09_P048101	Euchromatic gene	7.01736	7.12987	18.3071	8.93835	9.2735	5.14313							forward	-3	-3	3.06	-3	-3	-3
[truncated: 37,157 more rows]

## Sheet: ModENCODE_RNA_Seq
Probe ID	NAME	0-2 hours	2-4 hours	4-6 hours	6-8 hours	8-10 hours	10-12 hours	12-14 hours	14-16 hours	16-18 hours	18-20 hours	20-22 hours	22-24 hours
A_09_P000046	Euchromatic gene	0	0	0	0	0	0	0	0	0	1	0	0
A_09_P000051	Euchromatic gene	0	0	0	0	0	0	0	0	0	0	0	0
A_09_P000056	Euchromatic gene	0	0	0	0	0	0	0	0	0	0	0	0
A_09_P000061	Euchromatic gene	0	0	0	0	1	0	0	0	0	0	0	1
A_09_P000066	Euchromatic gene	0	0	0	0	0	0	0	0	0	0	0	0
A_09_P000086	Euchromatic gene	0	0	0	0	0	0	0	0	2	0	0	0
A_09_P000161	Euchromatic gene	0	0	0	1	0	1	1	4	3	0	1	1
A_09_P000166	Euchromatic gene	0	0	0	0	1	0	0	0	0	0	0	0
A_09_P000196	Euchromatic gene	0	0	0	0	0	0	0	0	0	0	0	2
A_09_P000201	Euchromatic gene	0	0	0	0	0	0	0	0	0	0	0	0
A_09_P000206	Euchromatic gene	0	0	0	0	0	0	1	0	0	0	1	0
A_09_P000261	Euchromatic gene	0	0	0	0	0	0	0	0	0	0	0	0
A_09_P000346	Euchromatic gene	4	7	3	2	0	6	3	7	3	3	1	5
A_09_P000356	Euchromatic gene	0	0	0	0	0	0	0	0	0	0	0	0
A_09_P000361	Euchromatic gene	0	0	0	0	0	0	0	0	0	0	0	0
A_09_P000366	Euchromatic gene	0	0	0	0	0	0	0	0	0	0	0	0
A_09_P000371	Euchromatic gene	0	0	0	0	0	0	0	0	0	0	0	0
A_09_P000376	Euchromatic gene	0	0	0	0	0	0	0	0	0	0	0	0
A_09_P000381	Euchromatic gene	0	0	0	0	0	0	0	0	0	0	0	0
A_09_P000391	Euchromatic gene	0	0	0	0	0	0	0	0	0	0	0	0
A_09_P000446	Euchromatic gene	0	0	0	0	0	0	0	0	0	0	0	0
A_09_P000451	Euchromatic gene	0	0	0	0	0	0	0	0	0	0	0	0
A_09_P000456	Euchromatic gene	0	0	0	0	0	0	0	0	0	0	0	0
A_09_P000466	Euchromatic gene	0	0	0	0	0	0	0	0	0	0	0	0
A_09_P000531	Euchromatic gene	0	0	0	0	0	0	0	0	0	0	0	0
A_09_P000546	Euchromatic gene	0	0	0	0	0	0	0	0	0	0	0	0
A_09_P000771	Euchromatic gene	0	0	0	0	0	0	0	0	0	0	0	0
A_09_P000781	Euchromatic gene	0	0	0	0	0	0	0	0	0	0	0	0
A_09_P000806	Euchromatic gene	0	0	0	0	0	0	1	0	0	0	0	0
A_09_P000811	Euchromatic gene	0	0	0	0	0	0	0	0	0	0	0	0
A_09_P000831	Euchromatic gene	0	0	0	0	0	0	0	0	0	0	0	0
A_09_P000951	Euchromatic gene	1	1	1	0	1	0	1	3	5	3	8	3
A_09_P000976	Euchromatic gene	0	0	0	0	0	0	0	1	0	0	0	0
A_09_P000991	Euchromatic gene	0	0	0	1	2	2	0	1	0	0	0	0
A_09_P001001	Euchromatic gene	0	1	2	1	4	1	0	2	0	2	3	1
A_09_P001006	Euchromatic gene	0	0	0	0	0	0	0	0	0	0	0	0
A_09_P001026	Euchromatic gene	0	0	0	0	0	0	0	0	0	0	0	0
A_09_P001176	Euchromatic gene	0	0	0	0	0	0	0	0	0	0	0	0
A_09_P001186	Euchromatic gene	0	0	0	0	0	0	0	0	0	0	0	0
A_09_P001456	Euchromatic gene	0	0	0	0	0	0	0	0	0	0	0	0
A_09_P001461	Euchromatic gene	0	0	0	0	0	0	0	0	0	0	0	0
A_09_P001471	Euchromatic gene	0	0	0	0	0	0	0	0	0	0	0	0
A_09_P001811	Euchromatic gene	0	0	0	0	0	0	0	0	0	0	0	0
A_09_P002076	Euchromatic gene	0	0	0	1	2	0	0	0	0	2	0	0
A_09_P002081	Euchromatic gene	0	0	0	0	0	0	0	0	0	0	1	0
A_09_P002086	Euchromatic gene	0	0	0	0	0	0	0	0	0	0	0	0
A_09_P002136	Euchromatic gene	0	0	0	0	0	0	0	0	0	0	0	0
A_09_P002141	Euchromatic gene	0	0	0	0	0	0	0	0	0	0	0	0
A_09_P002166	Euchromatic gene	1	4	4	1	0	0	1	3	2	3	0	1
A_09_P002206	Euchromatic gene	0	1	0	0	0	0	0	0	0	0	0	0
A_09_P002346	Euchromatic gene	0	0	0	0	0	0	0	0	0	0	0	0
A_09_P002351	Euchromatic gene	0	0	0	0	0	0	0	0	0	0	1	0
A_09_P002466	Euchromatic gene	0	0	0	0	0	0	0	0	0	0	0	0
A_09_P002486	Euchromatic gene	0	0	0	0	0	0	0	0	0	0	0	0
A_09_P002506	Euchromatic gene	0	0	0	0	0	0	0	0	0	2	0	0
A_09_P002521	Euchromatic gene	0	0	0	0	0	0	0	0	0	0	0	0
A_09_P002601	Euchromatic gene	0	0	0	0	0	0	0	0	0	0	0	0
A_09_P002606	Euchromatic gene	0	0	0	0	0	0	0	0	0	0	0	0
A_09_P002611	Euchromatic gene	1	0	0	0	0	0	0	1	0	0	1	0
A_09_P002636	Euchromatic gene	6	1	5	3	5	18	4	5	5	7	1	5
A_09_P002646	Euchromatic gene	0	3	0	1	1	1	1	3	1	0	3	3
A_09_P002661	Euchromatic gene	0	0	0	0	0	0	0	0	0	2	2	3
A_09_P002981	Euchromatic gene	1	0	0	0	0	0	0	0	0	0	0	0
A_09_P002986	Euchromatic gene	0	0	0	0	0	0	0	0	0	0	0	0
A_09_P002991	Euchromatic gene	0	0	0	0	0	0	0	0	0	0	0	0
A_09_P002996	Euchromatic gene	0	0	0	0	0	0	0	0	1	0	0	0
A_09_P003001	Euchromatic gene	1	2	2	0	0	2	0	0	0	1	0	1
A_09_P003006	Euchromatic gene	0	0	0	0	0	1	0	0	2	4	24	7
A_09_P003011	Euchromatic gene	0	0	0	0	0	0	0	0	0	0	0	0
A_09_P003016	Euchromatic gene	0	0	0	0	0	0	0	0	0	0	0	0
A_09_P003021	Euchromatic gene	0	0	0	0	0	0	0	0	0	0	0	0
A_09_P003026	Euchromatic gene	0	0	0	0	0	0	0	0	0	0	0	0
A_09_P003031	Euchromatic gene	0	0	0	0	0	0	0	0	0	0	0	0
A_09_P003036	Euchromatic gene	0	0	0	0	0	0	2	1	0	2	0	1
A_09_P003041	Euchromatic gene	0	0	0	0	0	0	0	0	0	0	0	0
A_09_P003051	Euchromatic gene	0	0	1	0	0	0	0	0	0	0	0	0
A_09_P003056	Euchromatic gene	0	0	0	0	0	0	0	0	0	0	0	0
A_09_P003061	Euchromatic gene	0	0	0	0	0	0	0	0	0	0	2	1
A_09_P003066	Euchromatic gene	0	0	0	0	0	0	0	0	0	0	0	0
A_09_P003071	Euchromatic gene	0	5	3	4	2	1	0	1	0	0	0	0
A_09_P003076	Euchromatic gene	0	0	0	0	0	0	0	0	1	0	1	0
A_09_P003081	Euchromatic gene	0	0	0	0	0	0	0	0	0	0	0	0
A_09_P003086	Euchromatic gene	0	0	0	0	0	0	0	0	0	0	0	0
A_09_P003091	Euchromatic gene	0	2	3	0	0	0	0	0	0	0	0	1
A_09_P003721	Euchromatic gene	1	10	1	6	4	10	10	9	2	8	2	2
A_09_P003831	Euchromatic gene	0	0	0	0	0	0	0	0	0	0	0	2
A_09_P003836	Euchromatic gene	0	0	0	0	0	0	0	1	0	1	1	1
A_09_P003846	Euchromatic gene	0	0	0	0	0	0	0	0	1	0	0	1
A_09_P003851	Euchromatic gene	0	0	0	2	7	1	8	2	6	6	3	0
A_09_P003861	Euchromatic gene	0	0	0	0	0	0	0	0	0	0	0	0
A_09_P003896	Euchromatic gene	0	0	0	0	0	0	0	0	1	0	1	0
A_09_P003991	Euchromatic gene	0	0	0	0	0	0	0	0	0	1	0	0
A_09_P003996	Euchromatic gene	0	0	0	0	0	0	0	0	0	0	1	0
A_09_P004031	Euchromatic gene	1	1	1	1	2	0	6	10	5	9	6	3
A_09_P004056	Euchromatic gene	0	0	1	2	0	1	0	1	5	2	1	2
A_09_P004061	Euchromatic gene	0	0	0	0	0	0	0	0	0	0	0	0
A_09_P004071	Euchromatic gene	0	0	0	0	0	0	1	1	0	0	0	0
A_09_P004076	Euchromatic gene	0	0	0	0	0	0	0	0	0	0	0	0
A_09_P004136	Euchromatic gene	0	0	0	0	0	0	0	0	0	0	0	0
A_09_P004141	Euchromatic gene	0	2	0	2	1	0	0	0	0	1	0	1
A_09_P004146	Euchromatic gene	0	0	0	0	0	0	0	1	0	0	0	1
A_09_P004151	Euchromatic gene	0	0	0	0	0	0	0	0	0	0	0	0
A_09_P004171	Euchromatic gene	0	0	0	0	0	0	0	0	2	1	1	1
A_09_P004221	Euchromatic gene	0	1	0	1	1	0	0	0	0	0	0	0
A_09_P004356	Euchromatic gene	0	0	0	0	0	0	0	0	0	0	1	1
A_09_P004361	Euchromatic gene	0	0	0	0	0	0	0	0	0	0	0	0
A_09_P004466	Euchromatic gene	0	0	0	0	0	0	0	0	0	0	0	0
A_09_P004471	Euchromatic gene	1	0	1	0	3	0	0	0	1	0	1	0
A_09_P004501	Euchromatic gene	0	0	0	0	0	0	0	0	0	0	0	0
A_09_P004506	Euchromatic gene	0	0	0	0	0	0	0	0	0	0	0	0
A_09_P009516	Euchromatic gene	1	3	3	4	3	3	1	1	2	0	0	2
A_09_P009581	Euchromatic gene	0	0	0	1	0	0	0	0	0	0	0	0
A_09_P009621	Euchromatic gene	16	104	46	72	76	20	13	26	3	21	8	25
A_09_P009736	Euchromatic gene	5	21	13	4	19	10	12	8	8	6	7	5
A_09_P009786	Euchromatic gene	12	53	55	41	21	9	8	9	0	4	3	6
A_09_P009826	Euchromatic gene	0	0	0	0	0	0	0	0	0	0	0	0
A_09_P009856	Euchromatic gene	0	0	0	0	0	0	0	2	0	0	0	0
A_09_P009926	Euchromatic gene	0	0	0	1	2	2	0	0	1	1	0	0
A_09_P009936	Euchromatic gene	7	4	4	3	7	2	2	4	1	2	2	5
A_09_P009941	Euchromatic gene	69	392	199	243	113	372	182	245	201	244	249	290
A_09_P009961	Euchromatic gene	0	0	0	0	0	0	0	0	0	0	0	0
A_09_P009966	Euchromatic gene	0	0	0	0	0	0	0	0	0	0	0	0
A_09_P009986	Euchromatic gene	0	0	0	0	0	0	0	0	0	0	0	0
A_09_P010001	Euchromatic gene	1	0	0	0	0	0	0	1	0	0	0	1
A_09_P010006	Euchromatic gene	0	0	0	0	0	0	0	0	0	0	0	0
A_09_P010011	Euchromatic gene	0	0	0	0	0	0	0	0	0	0	0	0
A_09_P010016	Euchromatic gene	0	0	0	0	1	0	0	0	0	0	1	0
A_09_P010041	Euchromatic gene	0	0	0	0	0	0	1	0	0	4	0	1
A_09_P010051	Euchromatic gene	0	0	2	1	0	2	0	4	0	0	0	2
A_09_P010146	Euchromatic gene	1	2	0	1	0	0	0	2	0	0	2	1
A_09_P010246	Euchromatic gene	0	0	0	1	1	1	0	0	0	0	0	0
A_09_P010251	Euchromatic gene	2	3	0	1	1	0	3	1	1	1	0	3
A_09_P010351	Euchromatic gene	35	111	55	48	51	57	30	49	33	49	58	62
A_09_P010416	Euchromatic gene	0	4	4	4	0	0	0	0	2	0	0	1
A_09_P010466	Euchromatic gene	0	0	1	0	0	0	0	0	0	1	0	0
A_09_P010516	Euchromatic gene	0	0	1	0	0	0	0	0	0	0	0	1
A_09_P010521	Euchromatic gene	0	0	0	0	0	1	0	0	0	0	0	0
A_09_P010526	Euchromatic gene	65	90	87	99	69	74	41	74	30	63	41	74
A_09_P010536	Euchromatic gene	1	3	0	0	0	0	1	0	0	1	0	0
A_09_P010636	Euchromatic gene	3	2	0	1	0	0	1	7	1	4	2	3
A_09_P010706	Euchromatic gene	0	0	0	0	0	0	0	0	0	0	0	0
A_09_P010741	Euchromatic gene	0	0	0	0	0	0	0	0	0	0	0	0
A_09_P010756	Euchromatic gene	0	0	0	0	0	0	2	2	1	0	2	0
A_09_P010761	Euchromatic gene	1	1	0	0	1	1	1	0	0	0	1	0
A_09_P010846	Euchromatic gene	0	0	0	0	0	1	2	1	0	0	0	1
A_09_P010861	Euchromatic gene	0	0	0	0	0	0	0	0	0	0	0	0
A_09_P011056	Euchromatic gene	3	0	1	2	13	12	10	2	5	5	12	5
A_09_P011066	Euchromatic gene	0	9	4	0	2	3	0	1	0	0	1	3
A_09_P011091	Euchromatic gene	0	10	7	2	3	3	9	5	8	3	2	1
A_09_P011096	Euchromatic gene	1	3	2	1	2	0	0	4	1	3	1	4
A_09_P011136	Euchromatic gene	0	0	0	0	0	4	2	6	4	2	7	6
A_09_P011176	Euchromatic gene	21	30	31	20	31	20	11	22	7	17	23	16
A_09_P011181	Euchromatic gene	7	7	1	11	10	7	11	15	2	8	4	7
A_09_P011196	Euchromatic gene	0	0	0	0	0	0	0	0	0	0	0	0
A_09_P011271	Euchromatic gene	0	0	1	0	0	0	1	1	2	0	0	0
A_09_P011276	Euchromatic gene	1	3	7	3	11	4	18	12	6	4	11	12
A_09_P011341	Euchromatic gene	0	0	0	0	0	0	1	0	0	0	0	0
A_09_P011346	Euchromatic gene	0	7	2	1	1	5	5	2	0	1	0	3
A_09_P011416	Euchromatic gene	3	8	0	1	0	0	1	3	2	2	5	4
A_09_P011421	Euchromatic gene	1	3	0	0	1	2	1	3	1	1	0	1
A_09_P011471	Euchromatic gene	0	0	0	0	0	0	0	0	0	0	0	0
A_09_P011526	Euchromatic gene	0	2	0	0	0	0	0	0	0	0	0	0
A_09_P011536	Euchromatic gene	2	11	10	9	13	11	7	10	5	17	0	10
A_09_P011561	Euchromatic gene	0	1	1	1	0	1	1	1	0	2	0	0
A_09_P011566	Euchromatic gene	1	0	1	1	0	1	0	0	0	0	0	2
A_09_P011741	Euchromatic gene	0	0	0	0	0	0	0	0	0	0	0	0
A_09_P011746	Euchromatic gene	0	0	0	0	0	0	0	0	0	0	0	0
A_09_P011771	Euchromatic gene	0	0	0	1	0	1	2	0	0	0	0	0
A_09_P011781	Euchromatic gene	0	0	0	0	0	4	0	0	0	0	0	0
A_09_P011786	Euchromatic gene	6	2	0	1	0	0	0	0	0	0	0	0
A_09_P011806	Euchromatic gene	0	1	2	7	3	0	3	1	4	1	0	1
A_09_P011816	Euchromatic gene	0	0	1	2	0	1	4	3	1	0	1	0
A_09_P011831	Euchromatic gene	0	0	0	0	0	0	0	0	0	0	0	0
A_09_P011936	Euchromatic gene	1	3	3	2	3	3	1	0	0	1	0	2
A_09_P011941	Euchromatic gene	0	0	0	0	0	0	0	0	0	0	0	0
A_09_P011946	Euchromatic gene	0	1	0	0	0	0	1	1	3	1	1	8
A_09_P011986	Euchromatic gene	0	0	0	0	0	0	0	0	0	0	0	0
A_09_P012051	Euchromatic gene	0	0	0	0	0	1	0	2	0	1	1	0
A_09_P012056	Euchromatic gene	3	0	1	2	1	5	2	0	0	2	1	2
A_09_P012116	Euchromatic gene	0	1	0	0	0	0	0	0	0	1	1	0
A_09_P012121	Euchromatic gene	0	0	0	0	0	0	0	0	0	0	0	0
A_09_P012126	Euchromatic gene	25	121	105	60	101	81	68	119	78	101	85	73
A_09_P012156	Euchromatic gene	1	2	0	0	1	1	3	0	0	2	0	3
A_09_P012161	Euchromatic gene	0	0	0	0	0	0	0	0	0	0	0	0
A_09_P012201	Euchromatic gene	0	0	1	1	1	0	1	3	0	0	2	5
A_09_P012211	Euchromatic gene	1	4	1	2	2	0	2	0	0	0	0	1
A_09_P012231	Euchromatic gene	0	0	0	0	0	0	0	0	0	0	0	0
A_09_P012341	Euchromatic gene	0	2	1	1	0	0	0	0	0	0	0	0
A_09_P012376	Euchromatic gene	0	0	0	0	1	1	0	0	0	0	0	2
A_09_P012386	Euchromatic gene	3	1	2	2	0	3	0	1	0	1	0	0
A_09_P012411	Euchromatic gene	0	0	0	0	0	0	0	0	0	2	0	0
A_09_P012436	Euchromatic gene	2	8	10	6	0	20	1	7	2	5	6	14
A_09_P012471	Euchromatic gene	4	7	2	3	2	3	0	5	0	0	1	1
A_09_P012531	Euchromatic gene	0	0	0	0	0	0	0	0	0	0	0	0
A_09_P012561	Euchromatic gene	0	1	0	0	0	0	0	0	0	0	0	1
A_09_P012566	Euchromatic gene	0	0	0	0	0	1	0	0	0	0	0	0
A_09_P012571	Euchromatic gene	0	0	2	5	4	0	2	8	12	5	2	2
A_09_P012596	Euchromatic gene	0	1	0	0	0	0	0	2	1	4	7	4
A_09_P012616	Euchromatic gene	0	0	0	1	0	0	0	1	0	0	0	0
A_09_P012651	Euchromatic gene	0	0	1	0	0	0	5	4	0	1	2	3
A_09_P012666	Euchromatic gene	23	8	15	9	13	3	16	6	4	4	6	10
A_09_P012671	Euchromatic gene	1	2	0	0	4	0	0	0	0	2	0	0
A_09_P012686	Euchromatic gene	1	3	7	5	14	8	6	11	9	16	15	24
A_09_P012726	Euchromatic gene	1	2	0	1	1	2	2	4	3	1	0	5
A_09_P012861	Euchromatic gene	2	1	2	2	2	0	2	1	3	2	4	2
A_09_P012886	Euchromatic gene	1	0	1	0	1	0	0	0	0	0	0	1
A_09_P012901	Euchromatic gene	13	44	17	14	14	6	17	30	30	42	44	89
A_09_P012906	Euchromatic gene	0	0	0	0	0	0	0	0	0	0	1	0
A_09_P012931	Euchromatic gene	3	0	1	0	0	0	0	0	0	2	0	0
A_09_P012936	Euchromatic gene	0	1	0	0	2	0	1	2	0	0	0	0
A_09_P012946	Euchromatic gene	0	0	0	0	0	0	0	0	0	0	0	0
A_09_P012956	Euchromatic gene	0	0	0	0	0	0	0	0	0	0	0	0
A_09_P012971	Euchromatic gene	0	0	0	0	0	0	0	2	0	0	1	1
A_09_P012976	Euchromatic gene	0	0	0	0	1	0	0	0	0	0	0	0
A_09_P012991	Euchromatic gene	9	33	45	24	51	21	23	29	25	50	35	38
A_09_P013001	Euchromatic gene	0	0	0	0	0	0	0	1	1	1	0	2
A_09_P013041	Euchromatic gene	0	0	0	0	1	0	0	2	1	2	1	4
A_09_P013076	Euchromatic gene	0	0	0	0	0	0	0	0	0	0	0	0
A_09_P013086	Euchromatic gene	0	0	0	0	0	0	0	0	1	0	0	0
A_09_P013106	Euchromatic gene	0	0	0	2	0	0	0	0	0	0	0	0
A_09_P013181	Euchromatic gene	0	0	0	0	0	0	0	0	0	0	0	0
A_09_P013196	Euchromatic gene	8	5	8	6	2	0	7	15	2	6	5	2
A_09_P013231	Euchromatic gene	0	0	1	0	2	2	4	1	0	0	0	3
A_09_P013261	Euchromatic gene	3	1	0	0	0	0	0	0	0	0	0	0
A_09_P013266	Euchromatic gene	0	0	0	0	0	0	0	0	0	0	0	2
A_09_P013281	Euchromatic gene	1	2	2	0	1	1	0	3	0	0	0	2
A_09_P013301	Euchromatic gene	1	2	0	0	0	0	5	0	1	0	2	0
A_09_P013381	Euchromatic gene	0	0	0	0	0	0	0	0	0	0	1	0
A_09_P013411	Euchromatic gene	1	0	0	0	0	0	0	0	0	1	0	0
A_09_P013421	Euchromatic gene	0	1	0	0	0	0	0	0	0	2	7	1
A_09_P013431	Euchromatic gene	1	1	0	2	0	1	1	1	5	0	0	1
A_09_P013461	Euchromatic gene	0	0	0	0	0	0	0	2	0	0	0	0
A_09_P013481	Euchromatic gene	0	2	0	0	1	0	2	0	0	1	0	0
A_09_P013526	Euchromatic gene	0	1	1	0	0	0	0	0	1	0	0	1
A_09_P013531	Euchromatic gene	0	0	0	0	0	0	0	0	0	0	0	0
A_09_P013536	Euchromatic gene	0	0	0	0	0	0	0	3	1	0	0	1
A_09_P013541	Euchromatic gene	0	0	0	0	0	0	0	0	0	0	0	0
A_09_P013546	Euchromatic gene	0	0	1	0	0	1	0	1	0	0	0	1
A_09_P013551	Euchromatic gene	0	0	0	0	0	0	0	0	0	0	0	0
A_09_P013556	Euchromatic gene	0	2	3	1	1	1	0	7	3	5	2	6
A_09_P013561	Euchromatic gene	0	0	0	0	0	0	0	0	0	0	0	0
A_09_P013566	Euchromatic gene	0	0	0	0	0	0	0	0	0	0	0	0
A_09_P013571	Euchromatic gene	0	0	0	0	0	0	0	0	0	0	0	0
A_09_P013576	Euchromatic gene	0	0	0	0	0	0	1	0	1	0	0	0
A_09_P013581	Euchromatic gene	2	2	3	3	4	6	8	10	7	8	9	7
A_09_P013586	Euchromatic gene	5	15	14	1	2	1	2	6	3	4	3	2
A_09_P013591	Euchromatic gene	0	0	0	0	0	0	0	0	0	0	0	0
A_09_P013596	Euchromatic gene	0	0	0	0	0	0	0	0	0	0	0	0
A_09_P013601	Euchromatic gene	0	0	0	0	0	0	0	0	0	0	0	0
A_09_P013606	Euchromatic gene	0	0	0	0	0	0	0	0	0	0	0	0
A_09_P013611	Euchromatic gene	0	0	0	0	1	1	0	1	1	1	0	1
A_09_P013616	Euchromatic gene	0	0	0	0	0	0	0	0	0	0	0	0
A_09_P013621	Euchromatic gene	1	3	0	1	2	0	0	1	1	0	0	0
A_09_P013626	Euchromatic gene	0	0	0	0	0	0	0	0	1	0	1	0
A_09_P013631	Euchromatic gene	0	0	0	0	0	0	0	0	0	1	0	5
A_09_P013636	Euchromatic gene	1	0	0	0	0	0	0	0	0	0	0	0
A_09_P013641	Euchromatic gene	0	0	0	0	0	0	0	0	0	0	0	0
A_09_P013646	Euchromatic gene	0	0	0	0	1	0	1	1	1	0	2	5
A_09_P013656	Euchromatic gene	0	0	0	0	0	0	0	0	0	0	0	0
A_09_P013661	Euchromatic gene	0	0	0	0	0	0	0	0	0	0	2	0
A_09_P013666	Euchromatic gene	0	0	0	0	0	0	0	0	0	0	0	0
A_09_P013671	Euchromatic gene	0	0	0	0	0	0	0	0	0	0	0	0
A_09_P013676	Euchromatic gene	0	0	0	0	0	0	0	0	0	0	0	0
A_09_P013681	Euchromatic gene	0	0	0	0	0	0	0	1	1	0	1	1
A_09_P013686	Euchromatic gene	0	0	0	0	0	0	0	0	6	6	8	6
A_09_P013691	Euchromatic gene	0	0	0	0	0	0	0	0	0	0	0	0
A_09_P013696	Euchromatic gene	0	0	0	0	0	0	0	2	9	4	3	1
A_09_P013701	Euchromatic gene	0	0	0	0	0	0	1	0	0	0	0	0
A_09_P013706	Euchromatic gene	0	0	0	0	0	0	0	0	0	0	0	0
A_09_P013711	Euchromatic gene	0	0	0	0	0	0	0	0	0	0	0	0
A_09_P013716	Euchromatic gene	0	0	0	0	0	0	0	1	0	0	0	0
A_09_P013721	Euchromatic gene	0	0	0	0	0	0	0	0	0	0	0	0
A_09_P013726	Euchromatic gene	0	0	0	0	0	0	0	1	0	0	1	2
A_09_P013731	Euchromatic gene	0	0	0	0	0	0	0	0	0	0	0	0
A_09_P013736	Euchromatic gene	0	0	0	0	0	0	0	0	0	0	0	0
A_09_P013741	Euchromatic gene	0	0	0	0	0	0	1	0	0	3	0	2
A_09_P013746	Euchromatic gene	0	1	0	0	0	0	0	0	0	1	0	2
A_09_P013751	Euchromatic gene	0	0	0	0	0	0	0	0	0	0	0	1
A_09_P013756	Euchromatic gene	0	0	0	0	0	0	0	0	0	0	0	0
A_09_P013761	Euchromatic gene	0	0	0	0	0	1	0	0	0	1	0	0
A_09_P013766	Euchromatic gene	0	0	0	0	0	0	0	0	0	0	0	0
A_09_P013771	Euchromatic gene	0	0	0	0	0	0	0	0	0	0	0	0
A_09_P013776	Euchromatic gene	0	0	0	0	0	0	0	0	0	0	0	0
A_09_P013781	Euchromatic gene	0	0	0	0	0	0	0	0	0	0	0	0
A_09_P013786	Euchromatic gene	0	0	0	0	0	0	0	0	0	0	0	0
A_09_P013791	Euchromatic gene	0	0	0	0	0	0	0	0	0	0	0	0
A_09_P013806	Euchromatic gene	0	0	0	4	1	0	0	1	0	1	0	0
A_09_P013811	Euchromatic gene	0	0	0	0	1	6	1	8	13	6	0	0
A_09_P013816	Euchromatic gene	0	0	0	0	0	0	0	0	0	0	0	0
A_09_P013821	Euchromatic gene	0	0	0	0	0	0	0	0	1	0	0	0
A_09_P013826	Euchromatic gene	0	0	0	0	0	0	0	0	0	0	0	0
A_09_P013831	Euchromatic gene	0	0	0	0	0	0	0	0	0	0	0	0
A_09_P013836	Euchromatic gene	0	0	0	0	0	0	0	0	0	0	0	0
A_09_P013841	Euchromatic gene	0	0	0	0	0	0	0	0	1	0	0	0
A_09_P013846	Euchromatic gene	0	0	0	0	0	0	0	0	0	0	0	0
A_09_P013851	Euchromatic gene	0	0	0	0	0	0	1	3	0	0	0	1
A_09_P013856	Euchromatic gene	0	0	0	0	0	0	0	0	0	0	0	0
A_09_P013861	Euchromatic gene	0	0	0	0	0	0	0	0	1	2	0	1
A_09_P013866	Euchromatic gene	0	0	0	0	0	0	0	0	0	0	1	0
A_09_P013871	Euchromatic gene	0	0	0	0	0	0	0	0	0	0	0	0
A_09_P013876	Euchromatic gene	0	0	0	0	0	0	0	0	0	0	0	0
A_09_P013886	Euchromatic gene	0	0	0	0	0	0	0	0	0	0	0	0
A_09_P013891	Euchromatic gene	0	0	0	0	0	0	0	0	0	2	0	1
A_09_P013896	Euchromatic gene	1	1	2	0	0	0	0	1	0	1	0	0
A_09_P013901	Euchromatic gene	0	0	0	0	0	0	0	0	0	0	0	0
A_09_P013906	Euchromatic gene	0	0	0	0	0	0	0	0	0	0	0	0
A_09_P013911	Euchromatic gene	0	0	0	0	0	0	0	0	0	1	0	1
A_09_P013916	Euchromatic gene	0	0	0	0	0	0	0	0	0	0	0	0
A_09_P013921	Euchromatic gene	0	0	0	0	0	0	0	0	0	0	0	0
A_09_P013926	Euchromatic gene	0	0	0	0	0	0	0	0	0	0	0	0
A_09_P013931	Euchromatic gene	2	6	4	4	1	0	0	1	1	0	5	1
A_09_P013936	Euchromatic gene	2	1	1	2	5	6	8	8	2	2	3	0
A_09_P013941	Euchromatic gene	0	0	0	0	0	0	0	0	0	0	0	0
A_09_P013946	Euchromatic gene	0	0	0	0	1	0	0	0	0	0	0	0
A_09_P013951	Euchromatic gene	0	1	0	0	0	0	0	0	1	1	0	1
A_09_P013956	Euchromatic gene	0	0	0	0	0	0	0	0	0	0	0	0
A_09_P013961	Euchromatic gene	0	0	0	0	0	0	0	0	0	0	0	0
A_09_P013981	Euchromatic gene	0	0	0	0	0	0	0	0	0	0	0	0
A_09_P013986	Euchromatic gene	0	0	0	0	0	0	0	1	0	3	0	0
A_09_P013991	Euchromatic gene	0	0	0	0	0	0	0	0	0	0	0	0
A_09_P013996	Euchromatic gene	0	0	0	0	0	0	0	0	2	1	0	0
A_09_P014001	Euchromatic gene	0	0	0	0	0	0	0	0	0	0	0	0
A_09_P014006	Euchromatic gene	0	0	0	1	0	0	1	2	8	4	2	4
A_09_P014011	Euchromatic gene	0	0	0	0	0	0	0	0	0	0	0	0
A_09_P014016	Euchromatic gene	0	0	0	0	0	0	0	0	0	0	0	0
A_09_P014026	Euchromatic gene	0	0	0	0	0	0	0	0	0	0	0	0
A_09_P014031	Euchromatic gene	0	0	0	0	0	0	0	0	0	0	0	0
A_09_P014036	Euchromatic gene	0	0	0	0	0	0	0	0	0	0	0	0
A_09_P014041	Euchromatic gene	0	0	0	0	0	0	0	0	0	0	0	0
A_09_P014046	Euchromatic gene	0	2	0	0	0	0	0	0	0	0	0	0
A_09_P014051	Euchromatic gene	0	0	0	0	0	0	0	0	2	0	6	0
A_09_P014056	Euchromatic gene	0	0	0	0	0	0	0	0	1	10	5	12
A_09_P014061	Euchromatic gene	0	0	0	0	0	0	0	0	0	0	0	0
A_09_P014071	Euchromatic gene	0	0	0	0	0	0	0	0	0	0	0	0
A_09_P014076	Euchromatic gene	0	0	0	0	0	0	0	0	0	0	0	0
A_09_P014081	Euchromatic gene	1	1	2	2	4	1	0	3	1	1	2	1
A_09_P014091	Euchromatic gene	0	0	0	0	0	0	0	0	0	0	0	0
A_09_P014096	Euchromatic gene	0	0	0	0	0	0	0	0	0	0	0	0
A_09_P014101	Euchromatic gene	0	1	0	0	0	1	0	0	0	0	0	0
A_09_P014106	Euchromatic gene	0	0	0	0	0	0	0	0	0	0	0	0
A_09_P014111	Euchromatic gene	0	0	0	0	0	0	0	0	0	0	0	0
A_09_P014116	Euchromatic gene	0	0	0	0	0	1	0	0	0	0	0	0
A_09_P014121	Euchromatic gene	0	0	0	0	0	0	0	0	0	0	0	0
A_09_P014126	Euchromatic gene	0	0	0	0	0	0	0	0	0	0	0	0
A_09_P014131	Euchromatic gene	0	0	0	0	0	0	0	0	0	0	0	0
A_09_P014136	Euchromatic gene	0	0	0	0	0	0	0	1	1	0	1	0
A_09_P014141	Euchromatic gene	0	0	0	0	0	0	0	1	0	0	0	0
A_09_P014146	Euchromatic gene	0	1	0	1	0	1	3	0	4	2	4	0
A_09_P014151	Euchromatic gene	0	0	0	0	0	0	0	0	0	0	0	0
A_09_P014156	Euchromatic gene	0	0	0	0	0	0	0	0	0	0	0	0
A_09_P014161	Euchromatic gene	0	5	2	2	2	3	2	2	0	0	1	0
A_09_P014166	Euchromatic gene	0	0	0	0	0	0	0	0	0	0	0	0
A_09_P014176	Euchromatic gene	0	0	0	0	0	0	0	0	0	0	0	0
A_09_P014181	Euchromatic gene	0	0	0	0	0	0	0	1	0	0	0	0
A_09_P014186	Euchromatic gene	0	0	0	0	0	0	0	0	0	2	0	2
A_09_P014191	Euchromatic gene	1	2	1	1	1	1	0	0	0	0	0	0
A_09_P014196	Euchromatic gene	0	0	0	0	0	0	0	0	0	0	0	0
A_09_P014201	Euchromatic gene	0	0	0	0	0	0	0	0	0	0	0	0
A_09_P014206	Euchromatic gene	0	0	0	0	0	1	0	0	0	0	0	0
A_09_P014211	Euchromatic gene	0	0	0	0	0	0	0	0	0	0	0	0
A_09_P014216	Euchromatic gene	0	0	0	0	0	0	0	0	0	0	0	0
A_09_P014221	Euchromatic gene	0	0	0	0	0	0	0	0	0	0	0	0
A_09_P014226	Euchromatic gene	0	0	0	0	0	0	0	0	0	0	0	0
A_09_P014231	Euchromatic gene	0	0	0	0	0	0	0	0	0	0	0	0
A_09_P014241	Euchromatic gene	0	0	0	0	0	0	0	0	0	0	0	0
A_09_P015631	Euchromatic gene	0	0	0	0	0	0	0	0	0	0	0	0
A_09_P016556	Euchromatic gene	0	0	0	0	0	0	0	0	0	0	0	0
A_09_P016561	Euchromatic gene	0	0	0	0	0	0	0	0	1	0	0	0
A_09_P016566	Euchromatic gene	0	0	0	0	0	0	0	0	0	0	0	0
A_09_P016646	Euchromatic gene	0	0	0	0	0	0	0	1	0	0	0	0
A_09_P016651	Euchromatic gene	0	0	1	0	0	0	0	0	0	0	0	0
A_09_P016656	Euchromatic gene	0	1	1	0	0	0	1	4	2	3	2	0
A_09_P016661	Euchromatic gene	0	0	0	0	0	0	0	0	0	0	0	0
A_09_P016666	Euchromatic gene	0	0	0	0	0	0	0	0	0	0	0	0
A_09_P016671	Euchromatic gene	0	0	0	0	0	0	0	0	0	0	0	0
A_09_P016676	Euchromatic gene	0	0	0	0	0	0	0	0	0	0	0	0
A_09_P016681	Euchromatic gene	0	0	0	0	0	0	0	0	0	0	0	0
A_09_P016686	Euchromatic gene	0	0	0	0	0	0	0	0	0	0	0	0
A_09_P016691	Euchromatic gene	0	0	4	1	0	0	0	0	0	0	0	0
A_09_P016696	Euchromatic gene	0	0	0	0	3	1	3	6	0	0	0	0
A_09_P016851	Euchromatic gene	6	22	36	15	29	47	24	51	8	23	9	9
A_09_P016856	Euchromatic gene	0	2	0	2	1	0	0	2	1	0	0	0
A_09_P016861	Euchromatic gene	0	0	0	0	0	0	1	1	0	0	0	0
A_09_P016866	Euchromatic gene	0	0	0	0	0	0	0	0	0	0	0	0
A_09_P016871	Euchromatic gene	0	0	0	0	0	0	0	0	0	0	0	0
A_09_P016876	Euchromatic gene	4	0	2	2	0	1	0	2	2	1	1	1
A_09_P016886	Euchromatic gene	0	0	0	0	0	0	0	0	0	0	0	0
A_09_P016891	Euchromatic gene	0	0	0	0	0	2	0	0	1	0	0	0
A_09_P016896	Euchromatic gene	0	0	0	0	0	0	0	0	0	0	1	1
A_09_P016901	Euchromatic gene	0	0	0	0	0	0	0	0	0	0	0	7
A_09_P017071	Euchromatic gene	0	0	0	0	0	0	0	0	0	0	0	0
A_09_P017076	Euchromatic gene	0	0	1	1	4	3	8	15	22	13	14	10
A_09_P017391	Euchromatic gene	0	0	0	0	0	0	0	0	1	1	1	4
A_09_P017396	Euchromatic gene	0	0	0	0	0	0	0	0	0	0	0	0
A_09_P017456	Euchromatic gene	0	0	0	0	0	0	0	0	0	0	0	0
A_09_P017461	Euchromatic gene	0	0	0	0	0	0	0	0	0	0	0	0
A_09_P017466	Euchromatic gene	0	0	0	0	0	0	0	0	0	0	0	0
A_09_P017471	Euchromatic gene	0	0	0	0	0	0	3	0	0	0	0	0
A_09_P017476	Euchromatic gene	0	0	0	0	0	0	0	0	0	0	0	0
A_09_P017481	Euchromatic gene	0	0	0	0	0	0	0	0	2	6	4	4
A_09_P017486	Euchromatic gene	0	0	0	0	0	0	0	0	0	0	0	0
A_09_P017491	Euchromatic gene	0	0	0	0	0	0	0	0	0	0	0	0
A_09_P017496	Euchromatic gene	0	0	0	0	0	0	0	0	0	0	0	0
A_09_P017501	Euchromatic gene	0	0	0	0	0	0	0	0	0	0	0	0
A_09_P017506	Euchromatic gene	0	0	0	0	0	0	0	1	0	0	0	0
A_09_P017511	Euchromatic gene	0	0	0	0	0	0	0	0	0	1	0	0
A_09_P017516	Euchromatic gene	0	0	0	0	0	0	0	0	0	0	0	0
A_09_P017691	Euchromatic gene	0	0	0	0	0	0	0	0	0	0	0	0
A_09_P017782	Euchromatic gene	0	0	0	0	0	0	0	0	0	0	0	0
A_09_P017786	Euchromatic gene	0	0	0	0	0	0	0	0	0	0	0	0
A_09_P017791	Euchromatic gene	0	2	1	0	0	0	2	3	1	3	5	1
A_09_P017796	Euchromatic gene	0	0	0	0	0	0	0	1	0	0	0	0
A_09_P017801	Euchromatic gene	0	0	0	1	1	0	2	4	1	0	0	1
A_09_P017806	Euchromatic gene	1	1	6	0	7	1	2	1	1	0	0	1
A_09_P017811	Euchromatic gene	0	0	0	0	0	0	0	0	0	1	0	0
A_09_P017816	Euchromatic gene	0	0	0	0	0	0	0	0	0	1	0	0
A_09_P017821	Euchromatic gene	2	1	0	0	3	2	2	0	1	2	0	5
A_09_P017826	Euchromatic gene	0	0	0	0	0	0	0	0	0	0	0	0
A_09_P017831	Euchromatic gene	1	0	0	0	0	1	0	0	1	2	0	0
A_09_P017836	Euchromatic gene	0	1	0	0	0	0	0	0	0	0	0	0
A_09_P017841	Euchromatic gene	0	1	0	0	2	4	0	0	0	1	1	0
A_09_P017846	Euchromatic gene	0	0	0	0	0	0	0	0	0	0	0	0
A_09_P017851	Euchromatic gene	0	0	0	0	0	0	0	0	0	1	0	0
A_09_P017856	Euchromatic gene	0	2	0	1	0	2	1	0	0	1	0	0
A_09_P017861	Euchromatic gene	0	0	0	0	0	0	2	3	1	6	1	0
A_09_P017866	Euchromatic gene	3	9	3	0	0	0	1	0	0	0	2	1
A_09_P017871	Euchromatic gene	0	0	0	0	0	0	0	0	0	0	0	0
A_09_P017876	Euchromatic gene	0	0	0	0	0	0	0	0	0	0	0	0
A_09_P017881	Euchromatic gene	0	0	0	0	0	0	0	0	0	0	0	0
A_09_P017886	Euchromatic gene	0	0	0	0	0	0	0	0	0	0	0	0
A_09_P017891	Euchromatic gene	2	1	2	1	2	0	0	0	2	0	0	0
A_09_P017896	Euchromatic gene	0	2	1	1	2	0	0	1	0	0	0	0
A_09_P017901	Euchromatic gene	4	1	2	1	2	0	0	5	0	1	1	1
A_09_P017906	Euchromatic gene	0	1	0	0	0	0	1	1	4	4	1	1
A_09_P017911	Euchromatic gene	0	0	1	0	1	0	1	1	0	1	0	0
A_09_P017916	Euchromatic gene	1	2	1	0	0	0	0	2	0	1	0	0
A_09_P017921	Euchromatic gene	0	0	0	0	0	0	0	0	0	2	5	3
A_09_P017926	Euchromatic gene	0	0	0	0	0	0	0	0	0	0	4	10
A_09_P017931	Euchromatic gene	2	0	0	1	2	1	0	3	3	1	0	0
A_09_P017936	Euchromatic gene	0	2	0	0	2	1	1	0	1	0	2	0
A_09_P017941	Euchromatic gene	0	0	2	0	0	0	0	0	0	0	0	0
A_09_P017946	Euchromatic gene	1	0	3	1	0	0	1	0	0	1	0	0
A_09_P017951	Euchromatic gene	0	1	1	0	1	0	1	1	1	1	1	0
A_09_P017966	Euchromatic gene	0	0	0	0	0	0	0	0	0	0	0	0
A_09_P017971	Euchromatic gene	0	0	0	0	0	1	1	0	0	0	1	3
A_09_P017976	Euchromatic gene	1	1	0	0	0	0	0	1	1	0	0	0
A_09_P017981	Euchromatic gene	0	0	0	0	0	0	0	0	0	0	1	1
A_09_P017986	Euchromatic gene	0	0	0	0	0	0	0	0	1	0	0	0
A_09_P017991	Euchromatic gene	0	0	0	0	0	0	0	0	0	1	1	0
A_09_P017996	Euchromatic gene	0	0	0	0	0	0	0	0	0	0	0	0
A_09_P018001	Euchromatic gene	0	1	0	0	0	0	1	1	0	0	0	0
A_09_P018006	Euchromatic gene	0	1	1	0	0	0	0	0	1	0	0	0
A_09_P018011	Euchromatic gene	2	0	0	0	0	0	0	0	1	0	0	0
A_09_P018016	Euchromatic gene	0	0	1	0	0	0	1	1	0	0	0	1
A_09_P018021	Euchromatic gene	1	1	1	1	2	1	1	0	0	0	0	1
A_09_P018026	Euchromatic gene	0	0	0	0	0	0	0	0	0	0	0	0
A_09_P018031	Euchromatic gene	0	0	0	0	0	0	0	1	0	0	0	0
A_09_P018036	Euchromatic gene	0	0	0	0	0	0	0	0	0	0	1	2
A_09_P018041	Euchromatic gene	0	0	0	0	0	0	0	0	1	1	1	6
A_09_P018046	Euchromatic gene	0	0	0	0	0	0	0	0	0	0	0	0
A_09_P018051	Euchromatic gene	0	2	0	0	0	0	0	0	0	0	0	0
A_09_P018056	Euchromatic gene	1	0	0	0	0	0	1	2	0	0	0	0
A_09_P018061	Euchromatic gene	0	0	0	0	0	0	0	0	0	0	0	0
A_09_P018066	Euchromatic gene	4	15	3	6	6	4	1	3	1	2	4	5
A_09_P018071	Euchromatic gene	4	7	5	6	1	4	3	4	4	8	3	10
A_09_P018076	Euchromatic gene	0	0	0	0	0	0	0	2	0	0	0	0
A_09_P018081	Euchromatic gene	0	0	0	0	0	0	0	0	0	0	0	0
A_09_P018086	Euchromatic gene	0	0	0	0	0	0	0	0	0	0	0	0
A_09_P018091	Euchromatic gene	0	0	0	0	0	0	0	0	0	0	0	0
A_09_P018096	Euchromatic gene	0	0	0	0	0	0	0	0	0	0	0	0
A_09_P018101	Euchromatic gene	0	0	0	1	0	0	1	4	5	24	34	41
A_09_P018106	Euchromatic gene	0	0	0	0	0	0	1	0	0	4	0	11
A_09_P018111	Euchromatic gene	0	0	0	0	0	0	0	0	0	0	0	0
A_09_P018116	Euchromatic gene	0	1	0	0	0	2	1	0	1	0	0	2
A_09_P018121	Euchromatic gene	1	0	0	0	0	0	0	1	0	1	0	0
A_09_P018126	Euchromatic gene	0	0	0	0	0	0	0	1	0	0	0	0
A_09_P018131	Euchromatic gene	0	0	0	0	0	0	0	0	0	0	2	1
A_09_P018136	Euchromatic gene	0	0	0	0	0	0	0	0	0	0	0	0
A_09_P018141	Euchromatic gene	0	0	0	0	0	0	0	0	0	0	0	0
A_09_P018146	Euchromatic gene	1	1	2	0	1	2	1	7	4	1	1	4
A_09_P018151	Euchromatic gene	0	0	0	0	0	0	0	0	0	0	0	0
A_09_P018156	Euchromatic gene	0	0	0	0	0	0	0	0	0	0	0	0
A_09_P018161	Euchromatic gene	0	0	0	0	1	2	4	4	3	1	3	6
A_09_P018166	Euchromatic gene	2	1	0	0	0	0	0	0	0	0	0	4
A_09_P018171	Euchromatic gene	0	0	0	0	0	0	0	0	0	0	0	0
A_09_P018176	Euchromatic gene	0	0	0	0	0	0	0	0	0	0	0	0
A_09_P018181	Euchromatic gene	1	0	1	0	0	0	0	0	0	0	0	0
A_09_P018186	Euchromatic gene	0	0	0	0	0	0	0	0	0	0	0	0
A_09_P018191	Euchromatic gene	0	0	0	0	0	0	0	0	0	0	0	0
A_09_P018196	Euchromatic gene	0	1	0	0	1	2	0	0	0	3	1	0
A_09_P018201	Euchromatic gene	0	0	0	0	0	0	0	0	0	0	0	0
A_09_P018206	Euchromatic gene	0	1	2	0	3	1	0	2	0	0	0	2
A_09_P018211	Euchromatic gene	1	0	0	0	0	0	0	0	0	0	0	0
A_09_P018216	Euchromatic gene	0	1	0	0	0	1	0	0	0	0	0	0
A_09_P018221	Euchromatic gene	0	2	2	1	0	0	0	0	0	0	2	0
A_09_P018226	Euchromatic gene	0	0	0	0	0	0	0	3	1	2	0	2
A_09_P018231	Euchromatic gene	0	0	0	0	0	0	0	0	0	0	0	0
A_09_P018236	Euchromatic gene	0	0	0	0	0	0	0	0	0	0	0	0
A_09_P018241	Euchromatic gene	0	0	0	0	0	0	2	0	0	0	0	0
A_09_P018246	Euchromatic gene	0	0	0	0	0	0	3	1	0	0	1	0
A_09_P018251	Euchromatic gene	0	0	0	0	0	0	0	1	0	0	0	1
A_09_P018256	Euchromatic gene	0	0	0	0	0	0	0	0	0	0	0	0
A_09_P018261	Euchromatic gene	0	0	0	0	0	0	0	0	0	0	0	0
A_09_P018266	Euchromatic gene	0	0	0	0	0	0	0	0	0	0	0	0
A_09_P018271	Euchromatic gene	0	0	0	0	0	0	0	0	0	0	0	0
A_09_P018276	Euchromatic gene	0	0	0	0	0	0	0	0	1	0	0	0
A_09_P018281	Euchromatic gene	0	0	1	0	0	0	0	0	0	0	0	0
A_09_P018286	Euchromatic gene	0	0	0	0	0	0	0	0	0	0	0	0
A_09_P018291	Euchromatic gene	0	0	0	0	0	0	0	0	0	0	0	0
A_09_P018296	Euchromatic gene	0	0	0	0	0	0	0	0	0	0	0	0
A_09_P018306	Euchromatic gene	0	0	0	0	0	0	1	0	0	0	1	0
A_09_P018311	Euchromatic gene	0	2	0	0	0	1	0	0	0	0	0	0
A_09_P018316	Euchromatic gene	0	0	0	0	0	0	0	0	0	0	2	0
A_09_P018326	Euchromatic gene	0	0	0	0	0	0	0	0	0	2	0	0
A_09_P018331	Euchromatic gene	0	0	0	0	0	1	1	0	0	1	2	0
A_09_P018336	Euchromatic gene	0	0	0	0	0	0	0	0	0	0	0	0
A_09_P018341	Euchromatic gene	0	0	0	0	0	0	0	0	0	0	0	0
A_09_P018346	Euchromatic gene	0	0	0	0	0	0	6	10	1	2	3	13
A_09_P018351	Euchromatic gene	0	0	0	0	0	0	0	0	0	0	0	0
A_09_P018356	Euchromatic gene	0	0	0	0	0	0	0	0	0	0	0	0
A_09_P018361	Euchromatic gene	0	0	0	0	0	0	0	0	0	0	0	0
A_09_P018366	Euchromatic gene	0	0	0	0	0	0	0	0	0	0	0	0
A_09_P018371	Euchromatic gene	0	0	0	0	0	0	0	0	0	0	0	0
A_09_P018376	Euchromatic gene	1	2	2	0	0	0	0	2	0	2	2	0
A_09_P018381	Euchromatic gene	0	0	0	0	0	0	0	0	0	0	0	0
A_09_P018386	Euchromatic gene	0	0	0	0	0	0	0	0	0	0	0	0
A_09_P018391	Euchromatic gene	0	0	0	0	0	0	0	0	0	0	0	0
A_09_P018401	Euchromatic gene	1	3	0	4	1	6	1	1	0	0	0	4
A_09_P018406	Euchromatic gene	1	6	4	0	0	1	0	1	2	4	0	1
A_09_P018411	Euchromatic gene	2	6	0	0	1	1	0	0	0	3	1	0
A_09_P018421	Euchromatic gene	0	0	0	0	0	0	0	0	0	0	0	0
A_09_P018431	Euchromatic gene	0	0	0	0	0	0	0	0	0	0	0	0
A_09_P018436	Euchromatic gene	0	0	2	1	0	1	2	0	0	0	2	1
A_09_P018441	Euchromatic gene	0	2	0	0	0	0	0	0	0	0	0	0
A_09_P018446	Euchromatic gene	0	0	0	1	0	1	0	0	0	3	3	0
A_09_P018451	Euchromatic gene	2	0	0	1	2	3	2	0	1	0	4	0
A_09_P018456	Euchromatic gene	0	0	0	0	0	0	0	1	1	2	0	1
A_09_P018461	Euchromatic gene	0	0	0	0	0	0	0	0	0	0	0	0
A_09_P018466	Euchromatic gene	0	0	0	0	0	0	0	0	0	0	0	0
A_09_P018471	Euchromatic gene	0	0	0	0	0	0	0	0	0	0	0	1
A_09_P018476	Euchromatic gene	0	1	1	2	4	2	2	0	1	0	2	0
A_09_P018481	Euchromatic gene	0	0	0	0	0	0	0	0	1	0	0	0
A_09_P018486	Euchromatic gene	0	0	0	0	0	0	0	0	0	0	0	0
A_09_P018491	Euchromatic gene	0	0	0	0	0	0	0	0	0	0	0	0
A_09_P018496	Euchromatic gene	0	0	0	0	0	0	0	1	2	3	0	0
A_09_P018501	Euchromatic gene	0	0	0	0	0	0	0	0	0	0	0	0
A_09_P018506	Euchromatic gene	0	0	0	0	0	0	0	0	0	0	0	0
A_09_P018511	Euchromatic gene	0	0	0	0	0	0	0	0	0	0	1	0
A_09_P018516	Euchromatic gene	0	0	0	0	0	0	0	0	0	0	0	0
A_09_P018521	Euchromatic gene	0	0	0	0	0	0	1	0	1	4	1	0
A_09_P018526	Euchromatic gene	0	0	0	0	0	0	0	0	0	0	0	0
A_09_P018531	Euchromatic gene	13	15	15	0	2	12	11	3	7	32	52	72
A_09_P018536	Euchromatic gene	0	1	0	0	0	0	0	0	0	0	0	0
A_09_P018541	Euchromatic gene	0	0	1	0	1	0	0	1	0	1	0	0
A_09_P018546	Euchromatic gene	0	0	0	0	0	0	0	0	0	0	0	0
A_09_P018551	Euchromatic gene	0	0	0	0	0	0	0	0	0	0	0	0
A_09_P018556	Euchromatic gene	0	0	0	0	0	0	0	0	0	0	0	0
A_09_P018561	Euchromatic gene	0	0	0	0	0	0	0	3	2	1	4	6
A_09_P018571	Euchromatic gene	0	0	0	0	0	0	0	1	0	0	0	0
A_09_P018576	Euchromatic gene	0	0	0	0	0	0	0	0	0	0	0	0
A_09_P018581	Euchromatic gene	0	0	0	0	0	0	0	0	0	0	0	0
A_09_P018586	Euchromatic gene	0	0	0	0	0	0	0	0	0	0	0	0
A_09_P018591	Euchromatic gene	0	0	0	0	0	1	0	0	0	1	4	1
A_09_P018596	Euchromatic gene	0	0	0	0	0	0	0	0	0	0	0	0
A_09_P018601	Euchromatic gene	0	2	0	0	0	0	0	0	0	0	0	1
A_09_P018606	Euchromatic gene	3	5	1	4	3	4	2	4	2	7	2	10
A_09_P018611	Euchromatic gene	1	4	4	6	1	0	4	5	1	4	0	1
A_09_P018616	Euchromatic gene	0	0	0	0	0	0	0	0	0	0	0	0
A_09_P018621	Euchromatic gene	0	0	0	0	0	0	0	0	0	0	0	0
A_09_P018626	Euchromatic gene	0	0	0	0	0	0	0	0	0	0	0	0
A_09_P018631	Euchromatic gene	0	0	0	0	0	0	0	0	0	0	0	0
A_09_P018636	Euchromatic gene	0	0	0	0	0	0	0	0	0	0	0	0
A_09_P018641	Euchromatic gene	0	0	0	0	0	0	0	0	0	0	0	0
A_09_P018646	Euchromatic gene	0	0	0	0	0	0	0	0	0	0	0	0
A_09_P018651	Euchromatic gene	1	0	1	0	0	0	1	0	3	0	1	1
A_09_P018656	Euchromatic gene	5	4	1	0	1	0	0	2	1	0	0	3
A_09_P018661	Euchromatic gene	0	0	1	0	0	0	0	0	0	0	0	0
A_09_P018666	Euchromatic gene	0	0	0	0	0	0	0	0	0	0	0	0
A_09_P018671	Euchromatic gene	0	4	4	2	2	3	2	1	0	0	0	3
A_09_P018676	Euchromatic gene	3	8	0	4	10	6	1	2	3	2	6	2
A_09_P018681	Euchromatic gene	0	2	0	0	4	0	0	1	0	0	1	2
A_09_P018686	Euchromatic gene	1	1	0	0	0	0	0	1	1	0	0	0
A_09_P018691	Euchromatic gene	1	5	1	3	0	5	4	6	0	3	0	2
A_09_P018696	Euchromatic gene	3	6	5	10	1	6	3	6	1	7	0	7
A_09_P018701	Euchromatic gene	0	0	0	0	0	0	0	0	0	0	0	0
A_09_P018706	Euchromatic gene	0	0	0	0	0	0	0	2	1	2	2	5
A_09_P018711	Euchromatic gene	0	0	0	0	0	0	0	0	0	0	0	0
A_09_P018716	Euchromatic gene	0	0	0	0	0	0	0	0	0	0	1	0
A_09_P018721	Euchromatic gene	0	0	0	0	1	0	0	1	0	1	1	0
A_09_P018726	Euchromatic gene	0	0	0	0	0	0	0	1	0	0	0	0
A_09_P018731	Euchromatic gene	0	0	0	0	0	0	0	0	1	0	2	1
A_09_P018736	Euchromatic gene	0	0	0	0	0	0	0	2	5	3	0	0
A_09_P018741	Euchromatic gene	0	0	0	0	0	0	1	1	0	0	0	0
A_09_P018746	Euchromatic gene	0	0	0	0	0	0	0	0	0	0	0	0
A_09_P018751	Euchromatic gene	0	0	0	0	0	0	0	0	0	0	0	0
A_09_P018756	Euchromatic gene	0	0	0	0	0	0	0	0	0	0	0	0
A_09_P018761	Euchromatic gene	0	0	0	0	0	0	0	0	0	0	0	0
A_09_P018766	Euchromatic gene	0	0	0	0	0	0	0	0	0	0	0	0
A_09_P018771	Euchromatic gene	0	5	0	0	1	4	9	19	8	9	4	9
A_09_P018776	Euchromatic gene	0	0	0	0	0	0	0	0	0	0	0	0
A_09_P018781	Euchromatic gene	0	0	0	0	0	0	0	0	0	0	0	0
A_09_P018786	Euchromatic gene	0	2	2	0	2	2	0	0	2	1	1	0
A_09_P018791	Euchromatic gene	0	0	0	0	0	0	0	0	0	0	0	0
A_09_P018796	Euchromatic gene	0	0	0	0	1	0	0	0	0	0	0	0
A_09_P018801	Euchromatic gene	0	0	0	0	0	0	0	0	0	0	0	0
A_09_P018806	Euchromatic gene	0	0	1	0	0	0	0	0	0	1	0	0
A_09_P018811	Euchromatic gene	0	0	0	0	0	0	0	1	1	1	0	0
A_09_P018816	Euchromatic gene	0	0	0	0	0	0	0	0	0	0	0	0
A_09_P018821	Euchromatic gene	0	1	0	0	0	0	0	1	0	0	0	0
A_09_P018826	Euchromatic gene	2	5	2	0	0	1	0	3	0	0	0	1
A_09_P018831	Euchromatic gene	0	4	0	3	1	0	0	4	1	0	0	0
A_09_P018836	Euchromatic gene	1	1	0	1	2	0	0	0	0	0	1	0
A_09_P018841	Euchromatic gene	0	0	0	0	0	0	0	0	0	0	0	2
A_09_P018846	Euchromatic gene	0	0	0	0	0	0	0	0	0	0	0	0
A_09_P018851	Euchromatic gene	0	0	0	0	0	0	0	0	1	2	0	0
A_09_P018856	Euchromatic gene	0	1	1	1	1	0	0	1	0	0	1	1
A_09_P018861	Euchromatic gene	0	1	0	1	1	0	0	2	3	0	1	1
A_09_P018866	Euchromatic gene	0	0	0	0	0	1	0	0	0	0	0	0
A_09_P018871	Euchromatic gene	0	0	0	0	0	0	0	0	0	0	0	0
A_09_P018876	Euchromatic gene	0	0	0	0	0	0	0	0	0	0	0	0
A_09_P018881	Euchromatic gene	0	0	0	0	0	1	0	1	0	0	0	0
A_09_P018891	Euchromatic gene	0	0	0	0	0	0	0	0	0	0	0	0
A_09_P018896	Euchromatic gene	0	0	0	0	0	0	0	0	0	0	0	0
A_09_P018901	Euchromatic gene	0	0	0	0	0	0	0	0	1	4	1	4
A_09_P018906	Euchromatic gene	0	0	0	0	0	0	0	0	0	0	0	0
A_09_P018911	Euchromatic gene	0	1	0	2	0	0	0	0	0	1	0	0
A_09_P018916	Euchromatic gene	0	0	0	0	0	0	0	0	0	0	0	0
A_09_P018921	Euchromatic gene	0	0	1	0	0	1	2	0	3	2	3	4
A_09_P018926	Euchromatic gene	0	0	0	0	0	0	0	0	0	0	0	0
A_09_P018931	Euchromatic gene	0	0	0	0	0	0	1	0	0	0	0	1
A_09_P018936	Euchromatic gene	0	0	0	0	0	0	0	0	0	0	0	1
A_09_P018941	Euchromatic gene	0	0	0	0	0	0	0	0	0	0	0	0
A_09_P018946	Euchromatic gene	0	0	0	0	0	0	0	0	0	0	0	0
A_09_P018951	Euchromatic gene	0	0	0	0	0	0	0	0	0	0	0	0
A_09_P018956	Euchromatic gene	12	14	6	6	4	5	5	2	3	1	2	2
A_09_P018961	Euchromatic gene	0	0	0	0	3	4	16	18	23	29	6	2
A_09_P018966	Euchromatic gene	0	0	0	0	0	0	0	0	0	0	0	0
A_09_P018971	Euchromatic gene	0	0	0	0	0	0	0	0	0	0	0	0
A_09_P018976	Euchromatic gene	0	0	0	0	0	4	0	1	0	1	0	0
A_09_P018981	Euchromatic gene	36	2	2	9	5	1	2	4	3	2	2	0
A_09_P018986	Euchromatic gene	0	0	0	0	0	0	0	1	1	0	0	0
A_09_P018991	Euchromatic gene	0	0	1	0	0	2	2	0	1	0	1	0
A_09_P018996	Euchromatic gene	0	0	0	0	0	0	0	0	0	0	0	1
A_09_P019001	Euchromatic gene	7	21	25	16	7	9	3	1	1	3	3	5
A_09_P019006	Euchromatic gene	0	0	0	0	0	0	0	0	0	0	0	0
A_09_P019011	Euchromatic gene	1	10	1	2	3	8	8	15	5	2	5	0
A_09_P019016	Euchromatic gene	0	0	0	0	0	0	0	0	0	0	0	0
A_09_P019021	Euchromatic gene	0	0	0	0	0	0	0	0	0	0	0	0
A_09_P019026	Euchromatic gene	0	0	0	0	0	0	0	0	0	0	0	0
A_09_P019031	Euchromatic gene	0	0	0	0	0	0	0	0	0	0	0	0
A_09_P019036	Euchromatic gene	0	0	0	0	0	0	0	0	0	0	0	0
A_09_P019041	Euchromatic gene	0	0	0	0	0	0	0	0	0	0	0	0
A_09_P019051	Euchromatic gene	0	0	0	0	0	0	0	0	0	0	0	0
A_09_P019056	Euchromatic gene	0	0	0	0	0	0	0	0	0	0	0	0
A_09_P019061	Euchromatic gene	0	0	0	0	0	0	0	0	0	0	0	5
A_09_P019066	Euchromatic gene	0	0	0	0	0	0	1	0	3	9	16	8
A_09_P019071	Euchromatic gene	0	0	0	0	0	0	0	0	0	0	0	0
A_09_P019076	Euchromatic gene	0	0	0	0	0	0	0	0	0	1	1	0
A_09_P019081	Euchromatic gene	0	0	0	0	0	0	0	0	0	0	0	0
A_09_P019086	Euchromatic gene	0	0	1	0	0	1	1	0	0	0	0	1
A_09_P019096	Euchromatic gene	0	0	0	1	0	0	3	2	1	1	2	2
A_09_P019101	Euchromatic gene	0	3	0	1	5	0	0	0	0	0	2	0
A_09_P019106	Euchromatic gene	0	0	0	0	0	0	0	0	0	0	0	0
A_09_P019111	Euchromatic gene	3	0	0	0	1	0	0	0	0	3	0	0
A_09_P019116	Euchromatic gene	0	0	0	0	0	0	2	0	0	2	5	5
A_09_P019121	Euchromatic gene	0	0	0	0	0	1	0	0	0	0	7	6
A_09_P019126	Euchromatic gene	0	0	0	0	0	0	0	0	0	0	0	0
A_09_P019131	Euchromatic gene	0	0	0	0	0	0	0	0	0	0	0	0
A_09_P019136	Euchromatic gene	1	0	0	0	0	2	0	0	2	1	0	0
A_09_P019141	Euchromatic gene	1	0	1	0	1	1	0	1	0	0	0	1
A_09_P019146	Euchromatic gene	0	0	0	0	0	0	0	0	0	0	0	0
A_09_P019151	Euchromatic gene	0	2	0	0	0	0	0	0	0	0	0	0
A_09_P019156	Euchromatic gene	0	0	0	0	1	0	0	0	0	0	1	0
A_09_P019161	Euchromatic gene	0	1	0	0	0	0	0	0	0	0	0	0
A_09_P019166	Euchromatic gene	1	0	0	0	0	0	0	1	0	0	0	0
A_09_P019171	Euchromatic gene	0	2	2	1	1	0	0	0	0	0	0	0
A_09_P019176	Euchromatic gene	0	0	0	0	0	0	0	0	0	0	0	0
A_09_P019181	Euchromatic gene	0	0	0	0	0	2	0	1	0	0	0	0
A_09_P019186	Euchromatic gene	0	0	0	0	0	0	0	0	0	0	0	0
A_09_P019191	Euchromatic gene	1	3	11	13	9	7	5	6	0	4	2	4
A_09_P019196	Euchromatic gene	0	0	1	1	0	0	0	0	0	0	1	0
A_09_P019201	Euchromatic gene	1	1	1	0	2	0	2	0	0	0	0	0
A_09_P019206	Euchromatic gene	0	1	1	0	2	1	0	1	0	0	0	0
A_09_P019211	Euchromatic gene	0	0	1	0	0	0	0	0	0	0	0	0
A_09_P019216	Euchromatic gene	2	3	2	2	4	1	2	0	0	3	0	0
A_09_P019221	Euchromatic gene	0	0	0	0	0	0	0	0	0	0	0	0
A_09_P019226	Euchromatic gene	0	0	0	0	0	0	0	0	0	0	0	0
A_09_P019231	Euchromatic gene	0	0	0	0	0	0	0	0	0	0	0	0
A_09_P019236	Euchromatic gene	0	0	0	0	0	0	0	0	0	0	0	0
A_09_P019241	Euchromatic gene	0	0	0	0	0	0	0	0	0	0	0	0
A_09_P019246	Euchromatic gene	0	0	0	0	0	0	0	0	0	0	0	0
A_09_P019251	Euchromatic gene	0	7	0	0	0	0	0	0	0	0	0	0
A_09_P019256	Euchromatic gene	0	0	0	0	0	0	0	0	0	0	1	0
A_09_P019261	Euchromatic gene	0	0	2	0	0	0	0	0	0	0	0	0
A_09_P019266	Euchromatic gene	0	0	0	0	0	0	0	0	0	0	0	0
A_09_P019271	Euchromatic gene	0	0	0	0	1	3	2	4	4	2	3	2
A_09_P019276	Euchromatic gene	0	0	0	0	0	1	0	0	0	0	0	0
A_09_P019281	Euchromatic gene	0	0	0	0	2	6	8	66	138	259	124	87
A_09_P019286	Euchromatic gene	0	0	0	1	0	0	2	10	8	1	1	0
A_09_P019291	Euchromatic gene	1	3	3	1	2	2	1	1	0	1	0	1
A_09_P019296	Euchromatic gene	0	6	6	0	0	0	0	0	0	0	1	0
A_09_P019301	Euchromatic gene	1	2	6	2	1	0	0	0	0	1	3	1
A_09_P019311	Euchromatic gene	0	0	0	0	0	0	0	0	0	0	0	0
A_09_P019316	Euchromatic gene	0	0	2	0	1	1	0	1	0	1	1	2
A_09_P019321	Euchromatic gene	0	1	0	0	0	0	0	1	0	5	0	3
A_09_P019326	Euchromatic gene	0	0	0	1	0	0	0	0	0	0	0	0
A_09_P019331	Euchromatic gene	1	0	1	1	0	1	3	5	1	3	2	2
A_09_P019336	Euchromatic gene	0	2	0	0	1	0	0	0	1	0	1	0
A_09_P019341	Euchromatic gene	0	0	0	0	0	0	0	0	1	0	1	0
A_09_P019346	Euchromatic gene	0	0	0	0	0	0	0	0	0	0	0	0
A_09_P019351	Euchromatic gene	1	8	20	10	4	5	4	6	4	5	1	6
A_09_P019356	Euchromatic gene	0	0	0	0	1	0	0	2	7	4	0	0
A_09_P019361	Euchromatic gene	0	0	0	0	0	0	2	1	6	13	11	11
A_09_P019366	Euchromatic gene	0	0	0	0	0	0	0	0	0	0	0	0
A_09_P019371	Euchromatic gene	0	4	1	0	3	2	0	11	1	12	9	10
A_09_P019376	Euchromatic gene	0	0	0	0	0	0	0	0	0	1	0	0
A_09_P019381	Euchromatic gene	0	0	0	0	0	0	0	0	0	2	2	29
A_09_P019386	Euchromatic gene	0	0	0	0	0	0	0	0	0	0	0	2
A_09_P019391	Euchromatic gene	0	1	0	1	0	0	0	0	1	0	0	0
A_09_P019396	Euchromatic gene	0	1	0	0	0	0	0	0	0	0	1	0
A_09_P019401	Euchromatic gene	0	0	0	0	0	0	0	0	0	0	0	0
A_09_P019406	Euchromatic gene	0	0	0	0	0	0	0	0	0	0	0	0
A_09_P019411	Euchromatic gene	1	0	0	0	0	2	2	1	1	6	0	5
A_09_P019416	Euchromatic gene	0	3	1	1	0	6	0	0	1	1	0	0
A_09_P019421	Euchromatic gene	0	0	0	1	2	0	1	0	0	2	2	0
A_09_P019426	Euchromatic gene	1	2	1	1	1	0	0	0	0	0	1	0
A_09_P019431	Euchromatic gene	0	0	1	0	0	0	0	0	0	0	0	0
A_09_P019436	Euchromatic gene	0	0	2	0	0	0	1	0	0	0	2	0
A_09_P019441	Euchromatic gene	4	15	11	11	14	5	4	20	9	8	4	13
A_09_P019446	Euchromatic gene	4	14	2	3	1	8	2	2	0	1	0	2
A_09_P019451	Euchromatic gene	0	0	0	0	1	0	0	1	3	0	2	0
A_09_P019456	Euchromatic gene	1	1	0	0	1	3	3	0	0	2	1	1
A_09_P019461	Euchromatic gene	3	1	0	0	0	0	0	0	1	0	1	1
A_09_P019466	Euchromatic gene	6	6	4	0	1	2	0	2	0	0	0	0
A_09_P019471	Euchromatic gene	0	0	0	0	0	0	1	3	2	4	0	3
A_09_P019476	Euchromatic gene	3	4	0	0	0	0	1	0	4	3	0	0
A_09_P019481	Euchromatic gene	1	1	2	2	2	2	3	6	1	0	0	0
A_09_P019486	Euchromatic gene	1	3	3	1	8	4	7	4	2	6	9	5
A_09_P019491	Euchromatic gene	0	0	0	0	0	1	1	6	3	2	3	5
A_09_P019496	Euchromatic gene	0	0	0	0	0	0	0	0	0	0	1	1
A_09_P019501	Euchromatic gene	0	0	0	0	0	0	0	0	0	0	0	0
A_09_P019506	Euchromatic gene	0	0	0	0	0	0	0	0	0	0	0	0
A_09_P019511	Euchromatic gene	0	0	0	0	0	0	0	0	0	0	0	0
A_09_P019516	Euchromatic gene	0	0	0	0	0	1	0	1	7	13	8	15
A_09_P019521	Euchromatic gene	0	0	0	0	0	0	0	0	0	0	0	0
A_09_P019526	Euchromatic gene	0	0	0	0	0	0	0	0	0	0	0	0
A_09_P019531	Euchromatic gene	0	0	0	0	0	0	1	1	0	0	0	0
A_09_P019536	Euchromatic gene	1	0	1	0	0	0	3	0	0	0	0	0
A_09_P019541	Euchromatic gene	0	0	0	0	0	0	0	0	0	0	0	0
A_09_P019546	Euchromatic gene	1	0	0	1	0	1	0	3	1	3	0	0
A_09_P019551	Euchromatic gene	0	0	0	0	0	0	0	0	0	0	0	0
A_09_P019556	Euchromatic gene	0	0	0	0	0	0	0	0	0	0	0	0
A_09_P019561	Euchromatic gene	0	0	0	0	0	0	0	0	0	0	0	0
A_09_P019566	Euchromatic gene	0	0	0	0	0	0	0	0	0	0	0	1
A_09_P019571	Euchromatic gene	0	0	0	0	0	0	1	0	0	0	0	0
A_09_P019576	Euchromatic gene	1	2	0	0	0	0	0	2	0	0	1	0
A_09_P019581	Euchromatic gene	1	1	0	0	0	1	0	1	0	1	0	0
A_09_P019586	Euchromatic gene	0	0	0	0	0	1	1	0	0	0	0	1
A_09_P019591	Euchromatic gene	0	0	1	0	0	0	0	0	0	0	0	0
A_09_P019596	Euchromatic gene	0	0	0	0	0	0	0	0	0	0	0	0
A_09_P019601	Euchromatic gene	0	0	0	0	0	0	0	0	0	0	0	1
A_09_P019606	Euchromatic gene	0	0	3	0	4	1	3	1	0	0	0	1
A_09_P019611	Euchromatic gene	0	4	0	0	0	0	0	0	0	0	0	0
A_09_P019616	Euchromatic gene	1	3	0	0	0	0	0	0	0	0	0	0
A_09_P019621	Euchromatic gene	0	0	0	0	0	0	0	0	0	0	0	0
A_09_P019626	Euchromatic gene	0	0	0	0	0	0	0	0	0	0	0	0
A_09_P019631	Euchromatic gene	0	0	0	0	0	0	0	0	0	0	0	0
A_09_P019636	Euchromatic gene	0	0	0	0	0	0	0	0	0	0	0	0
A_09_P019641	Euchromatic gene	0	0	0	0	0	0	0	0	0	0	0	0
A_09_P019646	Euchromatic gene	0	0	0	0	0	0	0	0	0	0	0	0
A_09_P019651	Euchromatic gene	0	0	0	0	0	0	0	0	0	0	0	0
A_09_P019656	Euchromatic gene	0	0	0	0	0	0	0	0	0	0	0	0
A_09_P019666	Euchromatic gene	0	0	0	0	1	0	0	0	0	0	0	0
A_09_P019671	Euchromatic gene	0	0	0	0	0	0	0	0	0	0	0	0
A_09_P019676	Euchromatic gene	0	0	0	0	0	0	0	0	0	0	0	0
A_09_P019681	Euchromatic gene	0	0	0	0	0	0	0	0	4	0	0	0
A_09_P019686	Euchromatic gene	0	0	0	0	0	0	0	0	0	0	0	3
A_09_P019691	Euchromatic gene	0	1	2	4	0	2	1	5	3	1	0	2
A_09_P019696	Euchromatic gene	0	0	0	0	0	0	0	0	0	1	1	0
A_09_P019706	Euchromatic gene	0	0	0	2	0	0	4	2	0	2	1	1
A_09_P019711	Euchromatic gene	1	1	4	0	0	0	0	1	0	0	0	0
A_09_P019716	Euchromatic gene	0	0	2	3	1	1	0	0	0	2	0	2
A_09_P019721	Euchromatic gene	0	0	0	1	0	1	0	0	0	0	1	1
A_09_P019726	Euchromatic gene	0	0	0	0	2	0	0	0	1	1	1	0
A_09_P019731	Euchromatic gene	0	0	0	0	0	0	0	0	0	0	0	0
A_09_P019736	Euchromatic gene	0	0	0	0	0	0	0	0	0	0	0	0
A_09_P019741	Euchromatic gene	0	0	0	0	0	0	0	0	0	0	0	0
A_09_P019746	Euchromatic gene	0	0	0	0	0	3	0	2	0	0	0	0
A_09_P019751	Euchromatic gene	1	0	0	1	0	0	0	4	2	0	0	0
A_09_P019756	Euchromatic gene	0	0	0	0	0	0	0	0	0	3	0	1
A_09_P019761	Euchromatic gene	0	0	0	0	0	0	0	0	0	0	0	0
A_09_P019766	Euchromatic gene	0	0	0	0	0	0	0	0	0	0	0	0
A_09_P019771	Euchromatic gene	0	0	0	0	0	0	0	0	1	0	0	0
A_09_P019776	Euchromatic gene	0	0	0	0	0	0	0	0	0	0	0	0
A_09_P019781	Euchromatic gene	0	1	1	0	0	0	0	0	0	0	0	0
A_09_P019786	Euchromatic gene	0	0	0	0	0	0	0	0	0	0	0	0
A_09_P019796	Euchromatic gene	0	4	2	1	2	4	0	1	2	0	2	2
A_09_P019801	Euchromatic gene	0	0	0	0	0	0	0	0	0	0	0	0
A_09_P019806	Euchromatic gene	0	0	0	0	0	0	0	0	0	0	0	0
A_09_P019811	Euchromatic gene	0	0	0	0	0	0	0	0	0	0	1	1
A_09_P019816	Euchromatic gene	32	37	32	34	30	20	15	11	5	2	0	5
A_09_P019821	Euchromatic gene	0	0	0	0	0	0	0	0	0	0	0	0
A_09_P019826	Euchromatic gene	1	1	1	1	0	1	0	2	0	3	0	3
A_09_P019831	Euchromatic gene	0	0	0	0	0	0	0	0	0	0	0	0
A_09_P019836	Euchromatic gene	0	0	0	0	0	0	0	0	1	2	0	0
A_09_P019841	Euchromatic gene	0	0	0	0	0	0	0	1	0	1	0	0
A_09_P019846	Euchromatic gene	0	0	0	0	0	0	0	0	0	0	0	0
A_09_P019851	Euchromatic gene	0	4	0	0	2	1	2	1	3	2	2	0
A_09_P019856	Euchromatic gene	0	0	0	0	0	0	0	0	0	0	0	0
A_09_P019861	Euchromatic gene	0	0	0	0	0	0	0	0	0	0	0	0
A_09_P019866	Euchromatic gene	0	0	1	0	0	0	0	0	0	0	0	0
A_09_P019871	Euchromatic gene	0	1	5	0	2	6	0	1	0	0	0	1
A_09_P019876	Euchromatic gene	0	0	0	0	0	0	0	0	0	0	0	0
A_09_P019881	Euchromatic gene	0	0	0	0	0	0	0	0	0	0	0	0
A_09_P019886	Euchromatic gene	0	0	0	0	0	0	0	0	0	0	0	0
A_09_P019891	Euchromatic gene	0	0	0	0	0	0	0	0	0	0	0	0
A_09_P019896	Euchromatic gene	0	0	0	0	0	0	0	0	0	0	1	0
A_09_P019901	Euchromatic gene	0	0	0	0	0	0	0	0	1	0	2	0
A_09_P019906	Euchromatic gene	0	0	0	0	0	0	0	0	0	0	0	0
A_09_P019911	Euchromatic gene	0	0	0	1	0	0	0	1	0	0	1	0
A_09_P019916	Euchromatic gene	0	0	0	0	1	0	0	0	1	0	0	0
A_09_P019921	Euchromatic gene	0	0	0	0	0	0	0	0	0	0	0	0
A_09_P019926	Euchromatic gene	0	0	0	0	0	1	0	0	1	2	0	5
A_09_P019931	Euchromatic gene	0	0	0	0	0	0	0	0	0	0	0	0
A_09_P019936	Euchromatic gene	0	0	0	0	1	0	0	0	0	0	0	0
A_09_P019941	Euchromatic gene	0	0	0	0	0	0	0	0	0	0	1	1
A_09_P019946	Euchromatic gene	0	0	0	0	0	0	0	0	0	0	0	0
A_09_P019951	Euchromatic gene	0	0	0	0	0	0	0	0	0	1	1	0
A_09_P019956	Euchromatic gene	0	0	0	0	0	0	0	0	0	0	0	0
A_09_P019961	Euchromatic gene	0	0	0	0	0	0	0	0	0	0	0	0
A_09_P019966	Euchromatic gene	0	0	0	0	0	0	0	0	0	0	0	0
A_09_P019971	Euchromatic gene	0	0	0	0	0	0	0	0	0	0	0	0
A_09_P019976	Euchromatic gene	0	1	0	0	0	0	0	0	0	0	0	0
A_09_P019986	Euchromatic gene	0	2	1	3	1	1	1	1	1	3	0	1
A_09_P019991	Euchromatic gene	0	0	1	0	0	3	0	0	1	2	1	0
A_09_P019996	Euchromatic gene	0	0	0	0	0	0	4	15	3	6	3	3
A_09_P020001	Euchromatic gene	2	0	0	0	2	0	0	0	0	3	0	0
A_09_P020006	Euchromatic gene	2	2	2	0	1	0	2	5	1	0	0	0
A_09_P020011	Euchromatic gene	0	0	1	1	1	0	0	3	0	1	0	4
A_09_P020016	Euchromatic gene	0	0	0	0	0	0	0	0	0	0	0	0
A_09_P020026	Euchromatic gene	1	0	0	0	0	0	0	0	2	2	2	2
A_09_P020031	Euchromatic gene	0	0	0	0	0	0	0	0	0	0	0	0
A_09_P020041	Euchromatic gene	1	7	3	3	3	2	1	4	1	8	4	6
A_09_P020046	Euchromatic gene	0	0	0	0	0	0	0	0	0	0	0	0
A_09_P020051	Euchromatic gene	0	2	0	0	0	0	0	0	0	0	0	0
A_09_P020056	Euchromatic gene	2	0	1	0	1	0	2	0	0	0	0	0
A_09_P020061	Euchromatic gene	0	0	0	0	0	0	0	0	0	0	0	0
A_09_P020066	Euchromatic gene	5	25	10	9	8	5	7	1	5	13	4	6
A_09_P020071	Euchromatic gene	0	0	0	0	0	0	0	0	0	0	0	0
A_09_P020076	Euchromatic gene	0	0	0	0	0	0	1	0	0	1	0	1
A_09_P020081	Euchromatic gene	0	0	0	0	0	0	0	0	0	0	0	0
A_09_P020086	Euchromatic gene	0	0	0	0	0	0	0	0	0	1	1	0
A_09_P020091	Euchromatic gene	0	0	0	0	2	0	0	0	0	0	0	1
A_09_P020096	Euchromatic gene	0	0	0	0	0	0	0	0	0	0	0	0
A_09_P020101	Euchromatic gene	0	0	0	0	0	0	0	2	0	2	3	1
A_09_P020106	Euchromatic gene	0	0	0	0	0	0	0	6	1	0	1	0
A_09_P020111	Euchromatic gene	0	2	1	0	2	0	0	1	0	0	0	0
A_09_P020116	Euchromatic gene	0	0	0	0	0	0	0	0	0	0	0	0
A_09_P020121	Euchromatic gene	0	0	0	0	0	0	0	0	0	0	0	0
A_09_P020126	Euchromatic gene	0	0	0	0	0	0	0	0	1	0	0	1
A_09_P020131	Euchromatic gene	0	0	0	0	0	0	0	0	0	0	0	0
A_09_P020136	Euchromatic gene	0	0	0	0	0	0	0	0	1	0	0	0
A_09_P020141	Euchromatic gene	0	0	0	0	0	0	0	0	0	0	0	0
A_09_P020146	Euchromatic gene	0	0	0	0	0	0	0	0	0	0	0	0
A_09_P020151	Euchromatic gene	0	0	0	0	0	0	0	0	0	0	0	0
A_09_P020156	Euchromatic gene	0	0	0	0	0	0	0	0	0	0	0	0
A_09_P020161	Euchromatic gene	0	0	0	0	0	0	0	0	1	0	2	0
A_09_P020166	Euchromatic gene	0	0	0	0	0	0	0	1	8	5	2	4
A_09_P020171	Euchromatic gene	1	2	1	1	0	0	0	0	2	0	0	1
A_09_P020181	Euchromatic gene	0	0	0	0	0	0	0	0	0	0	0	0
A_09_P020186	Euchromatic gene	0	0	0	0	0	1	0	0	0	0	0	0
A_09_P020191	Euchromatic gene	0	0	0	1	0	0	0	0	0	0	0	0
A_09_P020196	Euchromatic gene	0	0	0	0	0	0	0	0	0	0	0	0
A_09_P020201	Euchromatic gene	0	0	0	0	0	0	0	0	0	0	0	0
A_09_P020206	Euchromatic gene	0	0	0	0	1	0	0	2	0	0	1	0
A_09_P020211	Euchromatic gene	0	0	0	0	0	0	0	0	0	0	0	0
A_09_P020216	Euchromatic gene	0	1	1	5	2	0	0	1	0	0	0	0
A_09_P020221	Euchromatic gene	0	7	11	5	17	13	27	50	31	13	9	4
A_09_P020226	Euchromatic gene	1	1	0	0	0	0	0	0	0	0	0	0
A_09_P020231	Euchromatic gene	0	0	0	1	0	0	0	0	0	0	0	0
A_09_P020236	Euchromatic gene	0	0	0	0	1	1	0	0	0	0	0	0
A_09_P020241	Euchromatic gene	3	24	15	12	19	6	7	6	3	1	4	5
A_09_P020246	Euchromatic gene	0	0	0	0	0	0	0	1	0	0	0	0
A_09_P020251	Euchromatic gene	1	0	0	0	0	2	0	2	0	1	1	3
A_09_P020256	Euchromatic gene	2	3	5	1	1	2	0	3	0	2	0	1
A_09_P020261	Euchromatic gene	0	0	0	0	0	0	0	0	0	1	0	0
A_09_P020266	Euchromatic gene	0	0	0	0	0	0	0	0	0	0	0	0
A_09_P020271	Euchromatic gene	0	3	0	1	1	1	1	1	0	0	0	0
A_09_P020276	Euchromatic gene	0	0	0	0	0	0	0	0	0	0	0	0
A_09_P020281	Euchromatic gene	10	18	8	4	10	0	9	3	3	5	0	13
A_09_P020286	Euchromatic gene	0	1	0	0	0	1	0	0	0	0	0	0
A_09_P020296	Euchromatic gene	0	0	0	1	0	0	0	1	1	0	0	0
A_09_P020301	Euchromatic gene	0	0	0	0	0	0	0	0	0	0	1	0
A_09_P020306	Euchromatic gene	0	1	2	0	1	0	0	0	1	2	5	1
A_09_P020311	Euchromatic gene	0	0	0	0	0	0	0	0	1	0	0	1
A_09_P020316	Euchromatic gene	0	0	0	0	0	0	0	0	0	0	0	0
A_09_P020321	Euchromatic gene	0	0	0	0	0	0	0	0	0	0	0	0
A_09_P020326	Euchromatic gene	0	0	2	2	3	0	0	1	0	4	0	0
A_09_P020331	Euchromatic gene	0	0	0	0	0	0	0	0	0	0	0	0
A_09_P020336	Euchromatic gene	0	0	0	0	0	0	0	0	0	0	0	0
A_09_P020341	Euchromatic gene	0	0	2	5	3	16	15	27	9	4	1	2
A_09_P020346	Euchromatic gene	0	1	0	0	2	1	7	39	32	89	47	33
A_09_P020351	Euchromatic gene	0	1	0	0	1	1	0	0	0	0	0	0
A_09_P020356	Euchromatic gene	0	0	0	0	0	0	0	0	0	0	0	0
A_09_P020361	Euchromatic gene	1	3	0	0	0	3	0	1	0	3	4	8
A_09_P020366	Euchromatic gene	0	0	0	2	16	14	4	6	2	3	6	7
A_09_P020371	Euchromatic gene	0	0	0	0	0	0	0	0	0	0	0	0
A_09_P020376	Euchromatic gene	0	0	0	0	0	0	0	0	0	0	0	0
A_09_P020381	Euchromatic gene	0	0	0	0	0	1	0	1	0	3	0	4
A_09_P020386	Euchromatic gene	0	0	0	0	0	0	0	0	0	0	0	0
A_09_P020396	Euchromatic gene	0	0	0	0	0	0	0	0	0	0	0	0
A_09_P020401	Euchromatic gene	0	0	0	0	1	0	0	0	0	0	1	0
A_09_P020406	Euchromatic gene	0	0	0	0	0	0	0	2	1	1	0	0
A_09_P020411	Euchromatic gene	0	0	0	0	0	0	0	0	2	1	1	1
A_09_P020416	Euchromatic gene	0	0	0	0	0	0	0	2	1	1	1	2
A_09_P020421	Euchromatic gene	0	0	0	0	0	0	0	0	0	0	0	0
A_09_P020426	Euchromatic gene	0	0	0	0	0	0	0	0	0	0	0	0
A_09_P020431	Euchromatic gene	0	0	0	0	1	0	0	0	1	1	0	0
A_09_P020436	Euchromatic gene	0	0	0	0	0	0	0	0	0	0	0	0
A_09_P020441	Euchromatic gene	0	0	0	0	0	0	0	0	0	0	0	0
A_09_P020446	Euchromatic gene	0	0	0	0	0	0	0	0	0	0	0	0
A_09_P020451	Euchromatic gene	0	0	0	0	0	0	0	0	0	0	0	0
A_09_P020456	Euchromatic gene	0	0	0	0	0	0	0	0	0	0	0	0
A_09_P020461	Euchromatic gene	0	0	0	0	0	0	0	0	0	0	2	3
A_09_P020466	Euchromatic gene	0	0	0	0	0	0	0	0	0	0	0	0
A_09_P020471	Euchromatic gene	0	0	0	0	0	0	0	0	0	0	0	0
A_09_P020476	Euchromatic gene	0	0	0	0	0	0	0	0	0	0	0	0
A_09_P020481	Euchromatic gene	0	0	0	0	0	0	0	0	0	0	0	0
A_09_P020486	Euchromatic gene	0	0	0	0	0	0	0	1	0	0	0	1
A_09_P020491	Euchromatic gene	0	0	0	0	0	0	0	2	1	1	1	4
A_09_P020496	Euchromatic gene	0	1	1	1	0	1	1	1	0	0	0	0
A_09_P020501	Euchromatic gene	0	1	1	0	1	0	1	0	0	1	0	0
A_09_P020506	Euchromatic gene	0	0	0	1	0	0	5	0	0	4	3	2
A_09_P020511	Euchromatic gene	0	0	0	0	0	0	0	0	0	0	0	0
A_09_P020516	Euchromatic gene	0	0	0	0	1	0	1	1	3	3	4	0
A_09_P020521	Euchromatic gene	0	0	0	0	0	0	0	0	0	0	0	0
A_09_P020526	Euchromatic gene	0	0	0	0	0	0	0	0	1	0	0	0
A_09_P020531	Euchromatic gene	0	3	2	2	3	0	1	2	0	0	0	0
A_09_P020536	Euchromatic gene	1	2	1	0	0	1	0	1	1	0	0	1
A_09_P020541	Euchromatic gene	0	0	0	0	0	0	0	0	1	0	1	0
A_09_P020546	Euchromatic gene	0	0	0	0	0	0	0	0	0	0	0	0
A_09_P020551	Euchromatic gene	0	0	0	0	0	0	0	0	0	0	0	0
A_09_P020556	Euchromatic gene	0	0	0	0	0	0	1	1	0	0	0	0
A_09_P020561	Euchromatic gene	1	0	3	3	1	3	1	2	7	4	4	3
A_09_P020566	Euchromatic gene	0	0	0	0	0	0	0	0	0	0	0	0
A_09_P020571	Euchromatic gene	0	0	0	0	0	0	0	0	2	5	0	1
A_09_P020576	Euchromatic gene	4	2	0	1	2	6	5	8	7	10	7	9
A_09_P020581	Euchromatic gene	0	0	0	0	0	0	0	0	0	0	0	0
A_09_P020586	Euchromatic gene	0	0	0	0	0	0	0	0	1	0	0	0
A_09_P020591	Euchromatic gene	4	12	9	5	9	8	3	2	0	5	6	2
A_09_P020596	Euchromatic gene	0	0	0	0	0	0	0	0	0	0	0	0
A_09_P020601	Euchromatic gene	0	0	0	0	0	0	0	0	0	1	1	0
A_09_P020606	Euchromatic gene	0	0	0	4	3	3	1	3	0	2	1	0
A_09_P020611	Euchromatic gene	0	0	0	0	0	0	0	0	0	0	0	0
A_09_P020616	Euchromatic gene	0	0	0	0	0	0	0	0	0	0	0	0
A_09_P020621	Euchromatic gene	1	0	1	0	0	0	0	1	0	0	2	0
A_09_P020626	Euchromatic gene	0	3	0	0	1	1	0	0	1	0	0	2
A_09_P020631	Euchromatic gene	0	1	0	0	0	0	0	0	3	0	1	0
A_09_P020636	Euchromatic gene	6	0	2	0	1	0	0	1	0	2	0	1
A_09_P020641	Euchromatic gene	0	1	1	0	4	4	0	1	0	1	0	1
A_09_P020646	Euchromatic gene	0	0	1	0	2	1	1	3	0	3	2	1
A_09_P020651	Euchromatic gene	1	11	1	1	1	2	4	7	4	4	5	7
A_09_P020656	Euchromatic gene	0	2	0	0	0	2	0	0	0	0	0	0
A_09_P020661	Euchromatic gene	1	4	3	2	1	2	0	2	0	0	0	2
A_09_P020666	Euchromatic gene	0	0	0	0	0	0	0	0	0	0	0	0
A_09_P020671	Euchromatic gene	0	0	0	0	0	0	0	0	0	0	0	0
A_09_P020676	Euchromatic gene	2	9	1	0	7	4	4	3	0	0	0	4
A_09_P020681	Euchromatic gene	1	0	0	2	0	0	0	0	0	0	0	1
A_09_P020686	Euchromatic gene	0	0	0	0	0	0	0	1	0	1	0	0
A_09_P020691	Euchromatic gene	0	0	0	0	0	0	0	0	0	0	0	0
A_09_P020696	Euchromatic gene	0	0	0	0	0	1	0	0	0	0	0	0
A_09_P020701	Euchromatic gene	4	8	4	2	4	5	2	6	3	4	1	7
A_09_P020706	Euchromatic gene	0	0	0	1	0	0	0	2	1	1	0	0
A_09_P020711	Euchromatic gene	0	0	0	0	0	0	0	0	0	0	3	0
A_09_P020716	Euchromatic gene	0	0	0	0	0	0	0	0	0	0	0	0
A_09_P020721	Euchromatic gene	0	0	0	0	0	0	0	0	0	0	0	0
A_09_P020731	Euchromatic gene	2	2	3	2	2	2	4	1	0	0	0	1
A_09_P020736	Euchromatic gene	0	0	0	0	0	0	0	1	1	0	0	1
A_09_P020741	Euchromatic gene	0	0	0	0	0	0	0	0	0	1	0	0
A_09_P020746	Euchromatic gene	1	0	5	8	1	2	2	2	0	0	0	0
A_09_P020751	Euchromatic gene	2	23	13	9	12	4	0	6	2	1	0	0
A_09_P020756	Euchromatic gene	0	0	2	0	0	1	0	1	2	0	2	3
A_09_P020761	Euchromatic gene	2	2	0	0	3	1	1	1	1	0	1	1
A_09_P020766	Euchromatic gene	0	0	0	0	0	0	0	0	0	0	0	0
A_09_P020771	Euchromatic gene	0	0	0	0	0	0	0	0	0	0	0	0
A_09_P020776	Euchromatic gene	0	0	0	0	0	0	0	3	1	5	8	8
A_09_P020781	Euchromatic gene	0	0	0	0	0	2	0	2	3	1	7	5
A_09_P020786	Euchromatic gene	0	0	0	0	0	0	0	0	0	0	0	0
A_09_P020791	Euchromatic gene	0	0	0	0	0	0	0	2	0	3	0	2
A_09_P020796	Euchromatic gene	0	0	0	0	0	0	0	0	2	2	0	4
A_09_P020801	Euchromatic gene	2	0	1	0	0	1	1	1	0	0	0	0
A_09_P020806	Euchromatic gene	1	1	0	1	0	0	1	5	1	4	5	3
A_09_P020811	Euchromatic gene	0	5	2	0	2	3	2	1	0	0	2	2
A_09_P020816	Euchromatic gene	0	0	0	0	0	0	0	0	0	0	0	0
A_09_P020821	Euchromatic gene	0	0	1	0	0	0	1	0	0	0	0	0
A_09_P020826	Euchromatic gene	1	0	0	0	0	0	1	0	0	0	0	0
A_09_P020831	Euchromatic gene	0	1	0	0	0	0	0	0	0	0	0	0
A_09_P020836	Euchromatic gene	1	4	1	2	5	1	2	1	0	0	0	0
A_09_P020841	Euchromatic gene	0	0	0	0	0	0	0	0	0	0	0	0
A_09_P020846	Euchromatic gene	0	0	0	0	0	0	0	0	0	0	0	0
A_09_P020851	Euchromatic gene	0	0	0	0	0	0	0	0	0	0	0	0
A_09_P020856	Euchromatic gene	0	0	0	0	0	0	0	0	0	0	0	0
A_09_P020861	Euchromatic gene	0	0	0	0	0	0	0	0	0	0	0	0
A_09_P020866	Euchromatic gene	0	0	0	0	0	0	0	0	0	0	0	0
A_09_P020871	Euchromatic gene	1	0	0	0	0	0	0	0	0	0	0	0
A_09_P020876	Euchromatic gene	0	0	0	0	0	0	0	0	0	0	0	0
A_09_P020881	Euchromatic gene	0	0	0	0	0	0	0	0	1	0	5	2
A_09_P020886	Euchromatic gene	0	1	3	1	1	0	4	1	0	0	0	1
A_09_P020891	Euchromatic gene	1	1	1	0	1	1	2	1	2	1	0	2
A_09_P020896	Euchromatic gene	1	2	1	0	2	1	1	0	0	0	0	0
A_09_P020901	Euchromatic gene	5	4	6	4	2	8	2	4	5	2	7	3
A_09_P020906	Euchromatic gene	2	0	0	1	2	0	0	0	0	0	0	0
A_09_P020911	Euchromatic gene	0	0	0	0	0	0	0	0	0	0	0	0
A_09_P020916	Euchromatic gene	0	0	0	0	0	0	0	0	0	0	0	0
A_09_P020921	Euchromatic gene	0	0	0	0	0	0	0	0	0	0	0	0
A_09_P020926	Euchromatic gene	0	1	0	0	2	0	0	2	2	1	1	2
A_09_P020931	Euchromatic gene	0	0	0	0	0	0	0	0	0	0	0	0
A_09_P020936	Euchromatic gene	0	0	0	0	0	0	0	0	0	0	0	0
A_09_P020941	Euchromatic gene	0	0	0	0	0	0	0	0	0	0	0	0
A_09_P020946	Euchromatic gene	0	0	0	0	0	0	0	0	0	0	0	0
A_09_P020951	Euchromatic gene	0	0	0	0	0	0	0	0	0	0	0	0
A_09_P020956	Euchromatic gene	0	0	0	0	0	0	0	0	0	0	1	0
A_09_P020961	Euchromatic gene	0	0	0	0	0	0	0	0	0	0	1	1
A_09_P020966	Euchromatic gene	0	0	0	0	0	0	0	0	0	0	0	0
A_09_P020971	Euchromatic gene	0	0	0	0	0	0	0	1	1	1	6	4
A_09_P020976	Euchromatic gene	0	0	0	0	0	0	2	7	12	12	25	23
A_09_P020981	Euchromatic gene	0	0	0	0	0	0	0	0	0	0	0	2
A_09_P020986	Euchromatic gene	3	0	1	1	5	2	1	0	1	1	1	0
A_09_P020991	Euchromatic gene	3	3	4	7	9	1	2	4	3	6	2	4
A_09_P020996	Euchromatic gene	0	0	0	0	0	0	0	0	0	0	0	0
A_09_P021001	Euchromatic gene	0	0	0	0	3	0	1	1	0	0	0	0
A_09_P021006	Euchromatic gene	0	0	0	0	0	0	0	0	0	1	0	0
A_09_P021011	Euchromatic gene	0	0	0	0	0	0	1	0	0	0	1	0
A_09_P021016	Euchromatic gene	0	0	0	0	0	0	0	0	1	3	16	25
A_09_P021021	Euchromatic gene	0	0	0	0	0	0	0	0	0	0	0	0
A_09_P021026	Euchromatic gene	0	0	0	0	0	0	0	3	13	9	3	6
A_09_P021031	Euchromatic gene	0	0	0	0	0	0	0	0	0	0	0	0
A_09_P021036	Euchromatic gene	0	0	0	0	0	0	0	0	0	0	0	0
A_09_P021041	Euchromatic gene	0	0	0	0	0	0	0	0	0	0	0	0
A_09_P021046	Euchromatic gene	0	0	0	0	0	0	0	0	0	0	0	0
A_09_P021051	Euchromatic gene	0	0	0	0	0	0	0	0	0	0	0	0
A_09_P021056	Euchromatic gene	0	0	0	0	0	0	0	0	0	0	0	0
A_09_P021061	Euchromatic gene	0	0	0	0	0	0	0	0	0	0	0	1
A_09_P021066	Euchromatic gene	1	4	0	0	0	0	2	2	0	2	1	1
A_09_P021071	Euchromatic gene	0	0	0	0	0	0	0	0	0	0	0	0
A_09_P021076	Euchromatic gene	11	31	13	3	8	2	3	0	1	1	1	4
A_09_P021086	Euchromatic gene	0	0	0	0	0	0	0	0	0	0	0	0
A_09_P021091	Euchromatic gene	0	0	0	0	0	0	0	0	0	0	0	0
A_09_P021096	Euchromatic gene	0	0	0	0	0	0	0	1	0	0	0	0
A_09_P021101	Euchromatic gene	0	0	0	0	0	0	0	0	0	3	1	3
A_09_P021106	Euchromatic gene	0	0	0	0	0	0	0	0	0	0	0	0
A_09_P021111	Euchromatic gene	0	0	0	0	0	0	0	0	0	0	0	0
A_09_P021116	Euchromatic gene	1	1	1	0	0	2	4	0	1	2	0	2
A_09_P021121	Euchromatic gene	0	0	0	0	0	0	0	0	0	0	0	0
A_09_P021126	Euchromatic gene	0	0	0	1	4	2	2	3	0	0	1	1
A_09_P021131	Euchromatic gene	0	0	0	0	0	0	0	0	1	1	3	6
A_09_P021136	Euchromatic gene	0	0	0	0	0	0	0	0	0	0	0	0
A_09_P021141	Euchromatic gene	0	0	0	0	0	0	0	0	0	0	0	0
A_09_P021146	Euchromatic gene	0	0	0	0	0	0	0	0	0	0	0	0
A_09_P021151	Euchromatic gene	0	0	0	0	0	0	1	0	0	0	0	0
A_09_P021156	Euchromatic gene	0	0	1	0	0	0	0	0	0	1	0	1
A_09_P021166	Euchromatic gene	0	0	0	0	0	0	0	0	0	0	0	0
A_09_P021171	Euchromatic gene	2	1	3	0	1	1	1	4	2	3	1	3
A_09_P021176	Euchromatic gene	0	0	0	0	1	0	0	0	0	1	2	2
A_09_P021181	Euchromatic gene	0	2	1	1	1	2	1	3	1	1	2	2
A_09_P021186	Euchromatic gene	0	0	0	0	0	0	0	0	1	0	0	0
A_09_P021191	Euchromatic gene	0	0	0	0	0	0	0	0	1	1	0	0
A_09_P021196	Euchromatic gene	0	0	0	0	0	0	0	0	0	0	0	0
A_09_P021201	Euchromatic gene	0	0	0	0	0	0	0	0	0	0	0	0
A_09_P021206	Euchromatic gene	0	0	0	0	0	0	0	0	0	1	0	3
A_09_P021211	Euchromatic gene	0	0	0	0	0	0	0	0	0	0	0	0
A_09_P021216	Euchromatic gene	0	0	0	0	0	0	0	0	0	0	0	0
A_09_P021221	Euchromatic gene	0	0	0	1	0	0	0	0	0	0	0	0
A_09_P021226	Euchromatic gene	0	1	0	0	1	0	0	0	0	0	0	0
A_09_P021231	Euchromatic gene	0	0	0	0	0	0	0	0	0	0	0	0
A_09_P021236	Euchromatic gene	0	0	0	0	0	0	0	0	1	0	0	0
A_09_P021241	Euchromatic gene	1	6	4	2	5	2	0	4	0	1	1	1
A_09_P021246	Euchromatic gene	0	2	0	0	0	0	1	1	0	0	0	0
A_09_P021251	Euchromatic gene	0	0	0	0	0	0	10	8	6	6	6	11
A_09_P021256	Euchromatic gene	0	0	0	2	0	0	1	0	0	1	1	0
A_09_P021261	Euchromatic gene	0	0	0	0	0	0	1	0	0	0	0	0
A_09_P021266	Euchromatic gene	2	0	0	0	0	0	0	0	0	0	0	0
A_09_P021271	Euchromatic gene	0	0	0	0	0	0	0	0	0	0	0	0
A_09_P021276	Euchromatic gene	0	0	0	0	0	0	0	0	0	0	0	0
A_09_P021281	Euchromatic gene	0	0	0	0	2	0	0	1	0	0	0	0
A_09_P021286	Euchromatic gene	0	0	1	0	0	0	3	2	3	4	6	8
A_09_P021291	Euchromatic gene	0	3	1	0	0	0	0	0	0	0	0	0
A_09_P021296	Euchromatic gene	0	0	0	0	0	0	0	0	0	0	0	0
A_09_P021301	Euchromatic gene	0	0	1	0	0	0	1	0	1	0	0	0
A_09_P021306	Euchromatic gene	2	0	1	1	0	0	0	3	0	0	0	0
A_09_P021311	Euchromatic gene	2	0	1	0	0	2	1	1	1	0	2	0
A_09_P021316	Euchromatic gene	0	0	0	0	0	0	0	0	0	0	0	0
A_09_P021321	Euchromatic gene	0	0	0	0	0	0	0	0	0	0	0	0
A_09_P021326	Euchromatic gene	0	0	0	0	0	0	0	0	0	0	0	0
A_09_P021331	Euchromatic gene	0	0	0	0	0	0	0	0	0	0	0	1
A_09_P021336	Euchromatic gene	0	0	0	0	0	0	0	0	0	0	0	0
A_09_P021341	Euchromatic gene	0	0	0	0	0	0	0	0	0	0	0	0
A_09_P021346	Euchromatic gene	0	0	0	0	0	0	0	0	0	0	0	0
A_09_P021351	Euchromatic gene	0	0	1	0	1	0	0	0	0	0	1	0
A_09_P021356	Euchromatic gene	0	0	0	0	0	0	0	0	3	1	0	0
A_09_P021361	Euchromatic gene	0	0	0	0	0	0	0	0	0	0	0	0
A_09_P021366	Euchromatic gene	3	4	0	1	3	0	1	0	0	1	0	0
A_09_P021371	Euchromatic gene	0	0	0	0	0	0	0	0	0	0	0	0
A_09_P021376	Euchromatic gene	0	0	0	0	0	1	0	0	0	0	0	0
A_09_P021381	Euchromatic gene	3	5	4	2	2	3	1	1	1	4	5	3
A_09_P021386	Euchromatic gene	0	0	0	0	0	0	0	0	0	0	0	0
A_09_P021391	Euchromatic gene	0	0	0	0	0	1	1	0	0	0	0	0
A_09_P021396	Euchromatic gene	2	4	4	1	2	4	1	7	0	0	0	4
A_09_P021401	Euchromatic gene	1	1	2	0	0	0	2	0	1	0	1	2
A_09_P021406	Euchromatic gene	2	8	9	4	9	8	4	5	2	6	3	7
A_09_P021411	Euchromatic gene	0	1	1	2	2	0	1	0	0	0	0	0
A_09_P021416	Euchromatic gene	2	1	5	3	8	5	11	15	9	19	12	11
A_09_P021421	Euchromatic gene	1	7	1	0	3	1	2	0	0	1	1	1
A_09_P021426	Euchromatic gene	0	0	0	0	0	0	0	0	0	0	0	0
A_09_P021431	Euchromatic gene	0	1	0	0	0	0	0	0	0	0	0	1
A_09_P021436	Euchromatic gene	0	0	0	0	0	0	0	0	0	0	0	0
A_09_P021441	Euchromatic gene	5	15	17	4	17	8	11	7	4	5	4	6
A_09_P021446	Euchromatic gene	3	3	5	0	0	0	4	1	1	2	3	0
A_09_P021456	Euchromatic gene	0	0	0	0	0	0	0	0	0	0	0	0
A_09_P021461	Euchromatic gene	0	0	0	0	0	0	0	0	0	0	0	0
A_09_P021466	Euchromatic gene	0	0	0	0	0	0	1	3	0	2	3	0
A_09_P021471	Euchromatic gene	2	3	0	0	3	0	3	0	0	1	0	1
A_09_P021476	Euchromatic gene	8	14	2	6	6	8	4	9	3	4	6	4
A_09_P021481	Euchromatic gene	0	0	1	1	1	0	1	0	0	0	0	0
A_09_P021486	Euchromatic gene	0	0	0	0	0	0	0	0	0	1	0	0
A_09_P021491	Euchromatic gene	0	0	0	0	0	0	0	0	0	0	0	0
A_09_P021496	Euchromatic gene	0	0	0	0	0	0	0	0	0	0	0	5
A_09_P021501	Euchromatic gene	0	0	0	0	0	0	0	0	0	1	0	0
A_09_P021506	Euchromatic gene	0	0	0	0	0	0	0	0	0	0	0	0
A_09_P021511	Euchromatic gene	2	1	3	1	2	1	1	1	0	1	1	0
A_09_P021516	Euchromatic gene	0	0	0	0	0	0	0	0	0	0	0	0
A_09_P021521	Euchromatic gene	0	0	1	0	0	0	0	4	1	0	0	0
A_09_P021526	Euchromatic gene	0	0	1	0	0	0	0	0	0	0	0	0
A_09_P021531	Euchromatic gene	4	8	7	0	7	1	2	1	2	2	1	1
A_09_P021536	Euchromatic gene	0	0	0	0	0	0	0	0	0	0	0	0
A_09_P021541	Euchromatic gene	0	1	0	0	0	0	0	1	0	0	1	0
A_09_P021546	Euchromatic gene	0	0	0	0	0	0	0	0	0	0	0	0
A_09_P021551	Euchromatic gene	0	0	0	0	0	1	0	0	0	0	0	0
A_09_P021556	Euchromatic gene	0	0	0	0	0	0	0	0	0	0	0	0
A_09_P021561	Euchromatic gene	0	9	2	3	3	4	1	0	3	4	0	1
A_09_P021566	Euchromatic gene	5	8	0	0	0	1	2	4	2	6	8	4
A_09_P021571	Euchromatic gene	0	0	1	0	0	1	0	0	0	0	0	0
A_09_P021576	Euchromatic gene	3	2	1	1	1	1	0	1	0	0	1	1
A_09_P021581	Euchromatic gene	0	0	0	0	0	0	0	0	0	0	0	1
A_09_P021586	Euchromatic gene	0	0	0	0	0	0	0	0	0	0	0	0
A_09_P021591	Euchromatic gene	0	0	0	0	0	0	0	1	0	0	0	0
A_09_P021596	Euchromatic gene	0	1	1	1	0	1	0	0	0	0	0	0
A_09_P021601	Euchromatic gene	0	0	0	0	0	1	0	0	0	0	0	2
A_09_P021606	Euchromatic gene	0	0	0	0	0	0	0	0	0	0	1	0
A_09_P021611	Euchromatic gene	0	2	1	0	0	0	0	0	0	0	0	0
A_09_P021616	Euchromatic gene	0	7	0	1	0	0	0	1	2	0	0	0
A_09_P021621	Euchromatic gene	0	0	0	0	0	0	0	7	0	6	3	4
A_09_P021626	Euchromatic gene	0	0	1	0	1	0	0	0	0	0	0	1
A_09_P021631	Euchromatic gene	1	1	0	1	1	0	0	0	0	1	0	0
A_09_P021636	Euchromatic gene	0	1	0	0	0	0	0	0	0	0	0	2
A_09_P021641	Euchromatic gene	0	0	0	0	0	0	0	0	0	0	0	0
A_09_P021646	Euchromatic gene	0	0	0	0	0	0	0	0	0	0	0	0
A_09_P021651	Euchromatic gene	0	0	0	0	1	2	1	2	3	4	3	0
A_09_P021656	Euchromatic gene	0	1	0	0	0	0	0	0	0	0	0	0
A_09_P021661	Euchromatic gene	0	0	0	0	0	0	0	0	0	1	0	0
A_09_P021666	Euchromatic gene	0	0	0	0	0	0	0	0	0	0	0	2
A_09_P021671	Euchromatic gene	0	0	0	0	0	0	0	0	0	0	0	0
A_09_P021676	Euchromatic gene	0	0	0	0	0	0	0	0	0	0	0	0
A_09_P021681	Euchromatic gene	0	0	0	0	0	0	0	0	0	0	0	0
A_09_P021686	Euchromatic gene	0	0	0	0	0	0	0	0	0	0	0	0
A_09_P021691	Euchromatic gene	0	0	0	0	0	0	0	0	0	0	0	0
A_09_P021696	Euchromatic gene	0	0	0	0	0	0	0	0	0	0	0	0
A_09_P021701	Euchromatic gene	0	0	0	0	0	0	0	0	0	0	0	0
A_09_P021706	Euchromatic gene	0	0	0	0	0	0	0	0	0	0	1	1
A_09_P021711	Euchromatic gene	0	0	0	0	0	0	0	0	0	0	0	1
A_09_P021716	Euchromatic gene	0	0	0	0	0	5	2	0	0	0	7	21
A_09_P021721	Euchromatic gene	0	0	0	0	0	0	1	1	0	6	9	13
A_09_P021726	Euchromatic gene	0	0	0	0	0	0	0	0	0	0	0	0
A_09_P021731	Euchromatic gene	0	0	0	0	0	0	0	0	0	0	0	0
A_09_P021736	Euchromatic gene	0	0	0	0	0	0	3	0	0	2	0	0
A_09_P021741	Euchromatic gene	0	0	0	0	1	0	0	0	0	0	0	0
A_09_P021746	Euchromatic gene	0	3	2	0	1	0	1	0	1	7	0	2
A_09_P021751	Euchromatic gene	0	0	0	0	0	0	0	0	0	0	0	0
A_09_P021756	Euchromatic gene	0	1	0	2	0	0	0	1	0	1	0	1
A_09_P021761	Euchromatic gene	1	3	3	1	1	0	2	1	0	0	1	0
A_09_P021766	Euchromatic gene	0	0	0	0	0	0	0	0	0	0	0	0
A_09_P021771	Euchromatic gene	6	4	2	4	0	1	0	0	3	0	1	0
A_09_P021776	Euchromatic gene	0	0	0	0	0	0	0	0	0	0	0	0
A_09_P021781	Euchromatic gene	0	0	0	1	0	0	1	4	7	2	3	0
A_09_P021786	Euchromatic gene	0	0	0	0	0	0	0	0	0	0	0	0
A_09_P021791	Euchromatic gene	0	2	3	0	3	0	0	4	2	2	1	1
A_09_P021796	Euchromatic gene	1	0	0	0	2	0	0	2	6	9	0	0
A_09_P021801	Euchromatic gene	0	0	0	0	0	0	0	0	0	0	0	0
A_09_P021806	Euchromatic gene	0	0	0	0	0	0	0	0	0	0	1	0
A_09_P021811	Euchromatic gene	0	0	0	0	0	0	0	0	0	4	9	22
A_09_P021816	Euchromatic gene	2	1	4	3	1	1	2	1	1	7	4	2
A_09_P021821	Euchromatic gene	0	0	0	0	0	0	0	0	0	0	0	0
A_09_P021826	Euchromatic gene	0	0	0	0	0	0	0	0	0	0	0	0
A_09_P021831	Euchromatic gene	0	0	1	0	0	0	0	0	0	0	0	0
A_09_P021836	Euchromatic gene	0	0	0	0	0	0	0	0	0	0	0	0
A_09_P021841	Euchromatic gene	0	0	0	0	0	0	0	0	0	0	0	0
A_09_P021846	Euchromatic gene	0	0	0	0	0	0	0	0	0	0	0	0
A_09_P021851	Euchromatic gene	0	0	0	0	0	0	0	0	0	0	0	0
A_09_P021856	Euchromatic gene	0	0	0	0	0	0	0	0	0	0	0	0
A_09_P021861	Euchromatic gene	0	0	0	0	0	0	0	0	0	0	0	0
A_09_P021866	Euchromatic gene	0	1	1	0	0	0	0	1	0	0	0	1
A_09_P021871	Euchromatic gene	0	0	0	0	0	0	0	0	0	1	0	1
A_09_P021876	Euchromatic gene	0	3	1	0	0	0	3	0	0	0	0	0
A_09_P021881	Euchromatic gene	0	0	0	0	0	0	0	2	0	1	0	3
A_09_P021886	Euchromatic gene	0	0	0	0	0	0	1	0	0	0	0	0
A_09_P021891	Euchromatic gene	0	0	1	0	0	0	0	0	1	0	0	1
A_09_P021896	Euchromatic gene	1	9	2	0	0	0	0	0	0	0	0	0
A_09_P021901	Euchromatic gene	0	0	0	0	0	0	0	0	0	0	1	0
A_09_P021911	Euchromatic gene	0	0	0	0	0	0	0	0	0	0	0	0
A_09_P021916	Euchromatic gene	2	2	1	0	1	1	0	1	0	0	0	1
A_09_P021921	Euchromatic gene	0	0	1	0	0	0	0	0	0	0	0	0
A_09_P021926	Euchromatic gene	0	3	0	0	0	1	0	2	0	0	1	1
A_09_P021931	Euchromatic gene	0	0	0	0	0	1	0	0	0	0	0	0
A_09_P021936	Euchromatic gene	0	0	0	0	0	0	0	0	0	0	0	0
A_09_P021941	Euchromatic gene	0	0	0	0	0	0	0	0	0	0	1	0
A_09_P021946	Euchromatic gene	0	4	0	0	0	0	2	0	2	1	1	2
A_09_P021951	Euchromatic gene	0	3	0	0	0	0	1	0	0	0	0	0
A_09_P021956	Euchromatic gene	0	1	6	0	0	4	1	3	1	0	0	0
A_09_P021961	Euchromatic gene	1	0	0	0	0	0	0	1	1	0	0	1
A_09_P021966	Euchromatic gene	0	0	0	0	0	0	0	0	0	1	0	0
A_09_P021971	Euchromatic gene	0	0	1	0	0	0	0	0	0	0	0	0
A_09_P021976	Euchromatic gene	1	1	4	5	2	2	1	0	0	3	0	2
A_09_P021981	Euchromatic gene	0	0	0	0	0	0	0	0	0	0	0	0
A_09_P021986	Euchromatic gene	0	0	0	0	0	0	0	0	0	0	0	0
A_09_P021991	Euchromatic gene	0	0	0	0	0	0	0	2	0	0	0	1
A_09_P021996	Euchromatic gene	0	0	0	0	0	5	4	70	5	1	2	0
A_09_P022001	Euchromatic gene	1	0	0	0	0	0	0	0	1	0	0	0
A_09_P022006	Euchromatic gene	0	0	0	0	0	0	0	0	1	0	1	1
A_09_P022011	Euchromatic gene	0	0	0	0	0	0	0	0	0	0	0	0
A_09_P022016	Euchromatic gene	0	0	0	0	0	0	0	0	0	0	0	0
A_09_P022021	Euchromatic gene	0	0	0	0	0	0	0	0	0	0	0	0
A_09_P022031	Euchromatic gene	0	0	0	0	0	0	0	0	0	0	0	0
A_09_P022036	Euchromatic gene	0	0	0	0	0	0	0	0	0	0	0	0
A_09_P022041	Euchromatic gene	0	0	0	0	0	0	0	0	0	0	0	0
A_09_P022046	Euchromatic gene	0	0	0	0	0	0	0	0	0	0	0	0
A_09_P022051	Euchromatic gene	0	0	0	0	0	0	0	2	15	6	15	21
A_09_P022056	Euchromatic gene	4	0	0	0	0	0	0	0	0	0	0	0
A_09_P022061	Euchromatic gene	0	0	0	0	0	0	0	0	0	0	0	0
A_09_P022066	Euchromatic gene	0	0	0	0	0	0	0	0	0	0	0	0
A_09_P022071	Euchromatic gene	0	0	1	0	0	0	0	0	0	0	0	0
A_09_P022076	Euchromatic gene	0	0	0	0	0	0	0	0	0	0	1	0
A_09_P022081	Euchromatic gene	0	0	0	0	0	0	0	0	0	0	0	0
A_09_P022086	Euchromatic gene	0	0	0	0	0	0	0	0	0	0	0	0
A_09_P022091	Euchromatic gene	0	1	0	0	0	0	0	0	0	0	0	0
A_09_P022096	Euchromatic gene	0	0	0	0	0	0	0	0	0	0	0	0
A_09_P022101	Euchromatic gene	0	0	0	0	0	0	1	0	0	0	0	0
A_09_P022106	Euchromatic gene	0	0	0	0	0	0	0	0	0	0	0	0
A_09_P022111	Euchromatic gene	0	0	0	0	0	0	0	0	0	0	0	0
A_09_P022116	Euchromatic gene	0	0	3	0	0	0	1	1	0	0	0	1
A_09_P022121	Euchromatic gene	0	1	2	1	0	0	1	0	0	0	0	0
A_09_P022126	Euchromatic gene	0	1	0	0	1	0	0	0	1	1	0	0
A_09_P022136	Euchromatic gene	0	1	0	0	0	0	0	0	0	1	1	1
A_09_P022141	Euchromatic gene	0	0	0	0	0	0	0	0	0	0	0	0
A_09_P022146	Euchromatic gene	0	0	0	0	0	0	0	0	1	0	0	1
A_09_P022151	Euchromatic gene	0	0	0	0	0	0	0	0	0	1	0	0
A_09_P022156	Euchromatic gene	1	1	1	0	1	0	4	2	0	1	0	1
A_09_P022161	Euchromatic gene	0	0	0	0	0	0	0	1	0	0	0	0
A_09_P022166	Euchromatic gene	1	1	0	0	0	0	2	3	2	9	5	13
A_09_P022171	Euchromatic gene	1	0	0	0	0	0	0	0	0	1	0	0
A_09_P022176	Euchromatic gene	0	0	0	0	0	0	0	0	0	0	0	0
A_09_P022181	Euchromatic gene	2	4	5	1	6	3	1	1	0	3	4	2
A_09_P022186	Euchromatic gene	0	0	0	0	0	0	0	0	0	0	0	0
A_09_P022191	Euchromatic gene	0	0	0	0	1	0	0	0	0	1	0	0
A_09_P022196	Euchromatic gene	0	0	0	0	0	0	0	1	0	0	3	0
A_09_P022206	Euchromatic gene	1	0	1	1	1	1	1	0	0	0	1	3
A_09_P022211	Euchromatic gene	1	4	3	2	0	0	0	0	0	0	0	0
A_09_P022216	Euchromatic gene	0	0	0	0	0	0	0	0	0	0	1	0
A_09_P022221	Euchromatic gene	0	0	0	1	0	0	0	2	0	4	3	5
A_09_P022226	Euchromatic gene	0	0	0	0	0	2	1	3	0	0	0	0
A_09_P022231	Euchromatic gene	0	0	0	0	0	0	0	0	0	0	0	0
A_09_P022236	Euchromatic gene	0	0	0	0	0	0	0	0	0	0	0	0
A_09_P022241	Euchromatic gene	0	0	0	0	0	0	0	0	0	0	0	0
A_09_P022246	Euchromatic gene	3	8	4	2	4	3	13	8	4	11	3	4
A_09_P022251	Euchromatic gene	1	0	0	1	0	1	0	1	0	0	0	0
A_09_P022256	Euchromatic gene	0	0	0	0	0	1	0	3	3	4	1	3
A_09_P022261	Euchromatic gene	0	0	0	0	0	1	0	0	0	0	0	0
A_09_P022266	Euchromatic gene	0	0	0	0	0	0	0	0	0	0	0	0
A_09_P022271	Euchromatic gene	5	8	2	2	5	4	5	6	6	4	5	2
A_09_P022276	Euchromatic gene	0	0	0	0	0	0	0	0	0	0	0	0
A_09_P022281	Euchromatic gene	0	0	0	0	0	0	0	0	0	0	0	0
A_09_P022286	Euchromatic gene	0	0	0	0	0	0	0	0	0	0	5	2
A_09_P022291	Euchromatic gene	0	0	0	0	0	0	0	0	0	0	0	0
A_09_P022296	Euchromatic gene	0	0	0	0	0	0	0	1	1	0	5	2
A_09_P022301	Euchromatic gene	0	0	0	0	0	0	0	0	0	0	0	0
A_09_P022306	Euchromatic gene	0	0	0	0	0	0	0	0	0	1	0	0
A_09_P022311	Euchromatic gene	0	0	0	0	0	0	0	0	0	0	0	0
A_09_P022316	Euchromatic gene	0	0	0	0	0	0	0	0	0	0	0	0
A_09_P022321	Euchromatic gene	0	1	0	0	0	0	0	0	0	1	0	1
A_09_P022326	Euchromatic gene	0	0	0	0	0	0	0	0	0	0	0	0
A_09_P022331	Euchromatic gene	0	1	2	0	1	0	0	0	1	0	1	0
A_09_P022336	Euchromatic gene	0	0	0	0	0	0	0	0	1	0	0	0
A_09_P022341	Euchromatic gene	0	0	0	0	0	0	0	0	0	0	0	0
A_09_P022346	Euchromatic gene	0	0	0	0	0	0	0	1	0	0	0	0
A_09_P022351	Euchromatic gene	6	1	0	0	1	0	0	0	0	0	0	0
A_09_P022356	Euchromatic gene	0	1	2	0	1	0	0	1	0	0	0	4
A_09_P022361	Euchromatic gene	0	0	0	1	0	0	0	1	0	0	0	0
A_09_P022366	Euchromatic gene	1	0	0	0	0	0	0	2	0	1	0	0
A_09_P022371	Euchromatic gene	0	1	1	3	2	0	0	0	0	0	0	0
A_09_P022376	Euchromatic gene	0	0	0	0	0	0	0	1	0	0	0	0
A_09_P022381	Euchromatic gene	0	0	0	1	0	0	0	1	0	0	0	1
A_09_P022386	Euchromatic gene	0	0	0	0	0	0	0	0	0	0	0	0
A_09_P022391	Euchromatic gene	0	0	0	0	0	0	0	0	0	0	0	1
A_09_P022396	Euchromatic gene	0	0	0	0	0	0	0	0	0	0	0	0
A_09_P022401	Euchromatic gene	1	0	0	0	1	1	0	1	1	0	0	0
A_09_P022406	Euchromatic gene	0	0	0	0	0	0	0	0	0	0	0	0
A_09_P022411	Euchromatic gene	0	0	0	0	1	1	0	2	4	5	5	2
A_09_P022416	Euchromatic gene	0	0	0	0	0	1	0	0	0	0	0	0
A_09_P022421	Euchromatic gene	0	0	0	0	0	0	0	0	0	0	0	0
A_09_P022426	Euchromatic gene	0	0	0	0	0	0	0	0	0	0	1	0
A_09_P022431	Euchromatic gene	0	0	0	0	0	0	0	0	0	0	0	0
A_09_P022436	Euchromatic gene	2	0	0	0	0	0	0	1	0	0	0	0
A_09_P022441	Euchromatic gene	0	5	2	5	0	2	2	4	1	1	5	0
A_09_P022446	Euchromatic gene	3	5	6	2	6	2	3	1	2	1	0	1
A_09_P022451	Euchromatic gene	0	1	0	0	0	0	1	2	0	2	0	0
A_09_P022456	Euchromatic gene	0	0	0	0	0	0	0	0	0	0	0	0
A_09_P022461	Euchromatic gene	6	7	4	8	1	4	16	22	9	18	5	4
A_09_P022466	Euchromatic gene	0	0	2	0	0	0	1	0	1	0	0	0
A_09_P022471	Euchromatic gene	0	1	0	0	0	0	0	0	0	0	0	0
A_09_P022476	Euchromatic gene	0	0	0	0	1	2	1	0	0	0	3	1
A_09_P022481	Euchromatic gene	0	0	0	0	0	1	0	0	0	0	0	0
A_09_P022486	Euchromatic gene	0	0	0	0	0	0	0	0	0	0	0	0
A_09_P022491	Euchromatic gene	0	0	0	0	1	0	2	3	0	1	2	2
A_09_P022496	Euchromatic gene	1	1	0	0	0	0	0	0	0	0	0	0
A_09_P022501	Euchromatic gene	0	0	0	0	0	0	0	0	0	0	0	0
A_09_P022506	Euchromatic gene	0	4	2	0	1	1	0	1	0	0	3	0
A_09_P022511	Euchromatic gene	0	1	1	2	0	0	0	0	0	0	0	0
A_09_P022516	Euchromatic gene	1	4	2	0	0	1	0	1	0	0	0	0
A_09_P022521	Euchromatic gene	0	9	0	1	0	0	0	0	0	0	0	0
A_09_P022526	Euchromatic gene	0	0	0	0	0	0	0	0	0	0	0	0
A_09_P022531	Euchromatic gene	0	2	0	1	1	0	0	0	0	0	0	0
A_09_P022536	Euchromatic gene	0	0	0	0	0	0	0	0	0	0	0	0
A_09_P022541	Euchromatic gene	0	0	0	0	0	0	0	0	3	4	0	1
A_09_P022546	Euchromatic gene	0	1	0	0	0	0	0	0	0	0	0	0
A_09_P022551	Euchromatic gene	0	0	0	0	0	0	0	0	0	0	0	0
A_09_P022556	Euchromatic gene	0	1	0	0	0	0	0	0	0	0	0	0
A_09_P022561	Euchromatic gene	0	0	0	0	0	0	0	0	1	0	0	0
A_09_P022566	Euchromatic gene	0	0	0	0	0	0	0	0	0	0	0	0
A_09_P022571	Euchromatic gene	0	0	0	0	0	0	0	0	0	0	1	1
A_09_P022576	Euchromatic gene	0	0	0	0	0	0	0	0	0	0	0	0
A_09_P022581	Euchromatic gene	0	0	0	0	0	0	2	0	0	0	0	0
A_09_P022586	Euchromatic gene	0	0	0	0	0	0	0	0	0	0	0	0
A_09_P022591	Euchromatic gene	0	0	3	1	0	2	1	1	3	0	0	0
A_09_P022596	Euchromatic gene	4	0	3	0	0	3	6	8	8	4	2	11
A_09_P022601	Euchromatic gene	1	2	7	1	2	0	2	0	1	0	0	0
A_09_P022606	Euchromatic gene	2	3	1	2	0	3	5	5	0	0	5	6
A_09_P022611	Euchromatic gene	5	6	7	3	5	2	4	0	1	0	0	2
A_09_P022616	Euchromatic gene	1	0	0	1	0	0	1	0	0	2	0	0
A_09_P022621	Euchromatic gene	0	1	0	6	1	1	1	0	0	1	0	0
A_09_P022626	Euchromatic gene	1	1	0	0	0	0	0	0	0	1	0	0
A_09_P022631	Euchromatic gene	5	19	5	23	17	28	14	8	29	2	26	8
A_09_P022636	Euchromatic gene	0	0	0	0	0	0	0	0	0	0	0	0
A_09_P022641	Euchromatic gene	0	0	0	0	0	0	0	0	0	0	0	0
A_09_P022646	Euchromatic gene	0	0	0	0	0	0	0	0	1	0	2	0
A_09_P022651	Euchromatic gene	0	0	0	0	0	0	0	0	0	0	0	0
A_09_P022656	Euchromatic gene	0	0	0	0	0	0	0	0	0	0	0	0
A_09_P022661	Euchromatic gene	0	1	1	1	2	1	3	0	0	0	0	0
A_09_P022666	Euchromatic gene	0	0	0	0	0	0	0	0	0	0	0	0
A_09_P022671	Euchromatic gene	0	0	0	0	0	0	0	0	0	0	0	0
A_09_P022681	Euchromatic gene	0	0	2	0	0	0	0	0	0	0	0	0
A_09_P022686	Euchromatic gene	0	0	0	0	0	0	0	0	0	0	0	0
A_09_P022691	Euchromatic gene	0	1	1	0	0	0	1	1	0	0	0	0
A_09_P022696	Euchromatic gene	0	0	0	0	0	0	0	0	1	0	0	0
A_09_P022701	Euchromatic gene	0	0	0	0	0	0	0	0	1	1	1	0
A_09_P022706	Euchromatic gene	0	0	0	0	0	0	0	0	0	0	0	0
A_09_P022711	Euchromatic gene	0	0	0	0	0	0	0	0	0	0	0	0
A_09_P022716	Euchromatic gene	0	0	0	0	0	0	0	0	0	0	0	0
A_09_P022721	Euchromatic gene	0	0	0	0	0	0	0	0	0	0	0	0
A_09_P022726	Euchromatic gene	0	0	0	0	0	0	0	0	0	0	0	0
A_09_P022731	Euchromatic gene	0	0	0	0	0	0	0	0	0	0	0	1
A_09_P022736	Euchromatic gene	0	0	0	0	0	0	0	0	0	0	0	0
A_09_P022741	Euchromatic gene	0	0	0	0	0	0	0	0	0	0	0	0
A_09_P022746	Euchromatic gene	0	0	0	0	0	0	0	0	0	0	0	0
A_09_P022751	Euchromatic gene	0	0	0	0	0	0	0	0	0	0	0	0
A_09_P022756	Euchromatic gene	19	47	18	16	24	9	22	44	18	32	37	42
A_09_P022761	Euchromatic gene	0	0	0	0	0	0	1	1	1	0	5	2
A_09_P022766	Euchromatic gene	0	0	0	0	0	0	0	0	0	0	0	0
A_09_P022771	Euchromatic gene	1	0	0	0	0	0	0	1	1	0	0	2
A_09_P022776	Euchromatic gene	0	0	0	0	0	0	0	0	0	0	0	0
A_09_P022781	Euchromatic gene	0	0	0	0	0	0	0	0	0	0	0	0
A_09_P022786	Euchromatic gene	0	0	0	0	0	0	0	0	0	0	0	0
A_09_P022791	Euchromatic gene	12	31	4	3	3	5	3	3	0	0	1	0
A_09_P022796	Euchromatic gene	0	0	0	0	0	0	0	0	0	0	0	0
A_09_P022801	Euchromatic gene	0	0	0	0	0	0	0	0	0	0	0	0
A_09_P022806	Euchromatic gene	6	1	5	2	5	14	5	1	1	4	1	1
A_09_P022811	Euchromatic gene	0	4	9	5	2	0	0	0	1	1	1	1
A_09_P022816	Euchromatic gene	0	0	0	0	0	0	0	1	0	0	0	0
A_09_P022821	Euchromatic gene	0	0	0	0	0	0	1	1	0	2	0	0
A_09_P022826	Euchromatic gene	0	0	0	0	0	0	0	0	0	0	0	0
A_09_P022831	Euchromatic gene	0	0	0	0	0	0	0	0	0	0	0	0
A_09_P022836	Euchromatic gene	0	0	0	0	0	0	0	0	0	0	0	0
A_09_P022841	Euchromatic gene	0	0	0	0	0	1	0	2	0	0	0	0
A_09_P022846	Euchromatic gene	0	0	0	0	0	0	0	0	0	0	0	1
A_09_P022851	Euchromatic gene	0	0	0	0	0	0	1	1	2	1	0	0
A_09_P022856	Euchromatic gene	0	0	0	0	0	0	0	0	0	1	0	0
A_09_P022861	Euchromatic gene	0	0	0	0	0	0	0	0	2	3	2	0
A_09_P022866	Euchromatic gene	0	0	0	0	0	1	1	6	0	2	0	0
A_09_P022871	Euchromatic gene	0	0	0	0	0	0	0	0	0	0	0	0
A_09_P022876	Euchromatic gene	0	0	0	0	0	0	1	1	0	0	1	0
A_09_P022881	Euchromatic gene	0	0	0	0	0	0	0	0	0	0	0	0
A_09_P022886	Euchromatic gene	0	0	0	0	0	0	0	0	0	0	0	0
A_09_P022891	Euchromatic gene	0	0	0	0	0	0	0	0	0	0	0	0
A_09_P022896	Euchromatic gene	0	0	0	0	0	0	0	0	0	0	0	0
A_09_P022901	Euchromatic gene	0	0	0	0	0	0	0	1	0	0	1	0
A_09_P022906	Euchromatic gene	0	0	0	0	0	0	0	0	1	0	0	0
A_09_P022911	Euchromatic gene	0	0	0	0	0	0	0	0	0	0	0	0
A_09_P022916	Euchromatic gene	0	0	0	0	0	0	0	0	0	0	0	0
A_09_P022921	Euchromatic gene	1	1	1	0	0	1	2	0	0	0	0	0
A_09_P022926	Euchromatic gene	1	3	3	10	1	2	3	2	0	1	0	5
A_09_P022931	Euchromatic gene	15	18	18	8	4	3	1	8	0	5	8	7
A_09_P022936	Euchromatic gene	0	0	0	0	0	0	0	0	0	0	0	0
A_09_P022941	Euchromatic gene	0	0	0	0	0	0	0	0	0	0	0	0
A_09_P022946	Euchromatic gene	0	0	0	0	0	0	0	0	0	0	0	0
A_09_P022951	Euchromatic gene	0	0	0	0	0	0	0	0	0	0	0	0
A_09_P022956	Euchromatic gene	1	5	0	2	0	0	2	6	1	2	1	16
A_09_P022961	Euchromatic gene	0	0	0	1	0	0	0	0	0	0	0	0
A_09_P022966	Euchromatic gene	14	21	9	5	14	11	9	7	6	4	1	10
A_09_P022971	Euchromatic gene	0	1	0	0	0	0	0	0	0	0	0	0
A_09_P022976	Euchromatic gene	0	0	0	0	0	0	0	0	1	0	1	2
A_09_P022981	Euchromatic gene	0	0	0	0	0	0	0	1	0	0	0	0
A_09_P022986	Euchromatic gene	0	0	0	0	0	0	0	0	0	0	0	0
A_09_P022991	Euchromatic gene	0	0	0	0	0	0	0	0	0	0	0	0
A_09_P022996	Euchromatic gene	0	0	0	0	0	0	0	0	0	0	0	0
A_09_P023001	Euchromatic gene	0	0	0	0	0	0	0	0	0	0	0	0
A_09_P023006	Euchromatic gene	0	0	0	0	6	7	7	5	3	0	1	0
A_09_P023011	Euchromatic gene	0	0	0	0	0	0	1	0	1	0	0	0
A_09_P023016	Euchromatic gene	0	0	0	0	0	0	0	0	0	0	0	0
A_09_P023021	Euchromatic gene	0	0	0	0	0	0	0	0	0	0	0	0
A_09_P023026	Euchromatic gene	0	0	0	0	2	0	0	0	0	1	1	0
A_09_P023031	Euchromatic gene	0	0	0	0	0	0	0	0	0	0	0	0
A_09_P023036	Euchromatic gene	0	0	0	0	0	0	0	0	0	0	0	0
A_09_P023041	Euchromatic gene	0	0	0	0	0	0	0	0	0	0	0	0
A_09_P023046	Euchromatic gene	0	0	0	0	0	0	0	0	0	0	0	0
A_09_P023051	Euchromatic gene	0	0	1	0	2	1	2	0	1	1	1	3
A_09_P023061	Euchromatic gene	0	0	0	0	0	0	0	0	0	0	0	0
A_09_P023066	Euchromatic gene	0	0	0	0	0	0	0	0	0	0	0	0
A_09_P023071	Euchromatic gene	0	0	0	0	0	0	0	0	0	0	0	0
A_09_P023076	Euchromatic gene	0	3	0	0	0	1	0	0	0	0	0	0
A_09_P023081	Euchromatic gene	0	0	1	0	0	0	0	0	0	1	0	0
A_09_P023086	Euchromatic gene	0	0	0	0	0	0	0	0	0	0	0	0
A_09_P023091	Euchromatic gene	1	1	2	0	0	0	1	0	1	0	0	0
A_09_P023096	Euchromatic gene	0	0	0	0	0	0	1	1	0	1	0	0
A_09_P023101	Euchromatic gene	0	0	0	0	0	0	0	0	0	0	0	0
A_09_P023106	Euchromatic gene	0	0	0	0	0	0	0	0	0	0	0	0
A_09_P023111	Euchromatic gene	0	4	3	3	2	0	1	0	0	0	0	1
A_09_P023116	Euchromatic gene	0	0	0	0	0	0	0	0	0	1	0	0
A_09_P023122	Euchromatic gene	0	0	0	0	0	0	0	0	0	0	0	0
A_09_P023126	Euchromatic gene	0	0	1	0	4	0	0	6	0	2	1	1
A_09_P023131	Euchromatic gene	0	0	0	0	0	0	0	0	0	0	0	0
A_09_P023136	Euchromatic gene	0	0	0	0	1	1	3	7	0	1	1	0
A_09_P023141	Euchromatic gene	0	0	0	0	0	0	0	0	0	0	0	0
A_09_P023146	Euchromatic gene	0	0	0	0	0	0	0	2	1	0	0	0
A_09_P023151	Euchromatic gene	1	0	0	0	0	0	0	0	0	0	0	0
A_09_P023156	Euchromatic gene	4	2	0	0	1	1	5	1	0	2	3	3
A_09_P023161	Euchromatic gene	0	0	0	0	1	0	0	0	0	0	0	0
A_09_P023166	Euchromatic gene	0	0	0	1	0	1	0	0	0	0	0	0
A_09_P023171	Euchromatic gene	0	0	0	0	0	0	0	0	0	0	0	0
A_09_P023176	Euchromatic gene	0	0	0	0	0	0	0	0	0	0	0	0
A_09_P023181	Euchromatic gene	0	0	0	0	0	0	0	0	1	0	1	0
A_09_P023186	Euchromatic gene	0	2	1	0	0	0	0	0	0	0	0	0
A_09_P023191	Euchromatic gene	1	7	1	1	0	0	1	3	3	4	6	9
A_09_P023196	Euchromatic gene	0	2	0	0	0	0	0	0	0	1	0	0
A_09_P023201	Euchromatic gene	0	0	0	0	0	0	0	0	0	0	0	0
A_09_P023206	Euchromatic gene	6	16	7	4	6	0	3	9	2	2	1	6
A_09_P023211	Euchromatic gene	0	2	0	0	0	0	3	1	1	1	0	0
A_09_P023216	Euchromatic gene	1	2	0	0	0	0	1	0	0	1	2	1
A_09_P023221	Euchromatic gene	0	0	0	0	0	0	0	1	0	0	0	0
A_09_P023226	Euchromatic gene	0	0	0	0	0	0	0	0	0	0	0	0
A_09_P023231	Euchromatic gene	0	0	0	0	0	0	0	3	2	2	3	0
A_09_P023236	Euchromatic gene	0	0	0	0	0	0	0	0	0	0	0	0
A_09_P023241	Euchromatic gene	0	0	0	0	0	0	1	0	0	0	0	0
A_09_P023246	Euchromatic gene	0	1	0	0	0	0	1	0	0	0	1	0
A_09_P023251	Euchromatic gene	1	0	2	0	0	0	0	0	1	0	2	3
A_09_P023256	Euchromatic gene	0	0	0	0	0	0	0	0	0	0	0	0
A_09_P023261	Euchromatic gene	1	2	1	0	0	0	0	1	1	0	0	4
A_09_P023266	Euchromatic gene	6	8	3	3	3	1	1	2	2	3	6	1
A_09_P023271	Euchromatic gene	0	1	1	0	0	0	3	1	1	2	0	0
A_09_P023276	Euchromatic gene	0	2	1	1	2	1	0	0	0	1	0	1
A_09_P023281	Euchromatic gene	9	21	23	17	6	0	1	0	2	0	0	0
A_09_P023286	Euchromatic gene	0	0	1	0	3	6	3	1	1	3	2	1
A_09_P023291	Euchromatic gene	0	0	0	0	0	0	0	0	0	0	0	1
A_09_P023296	Euchromatic gene	0	1	0	0	0	0	0	0	0	0	0	0
A_09_P023301	Euchromatic gene	0	0	3	0	0	1	0	0	1	1	1	1
A_09_P023306	Euchromatic gene	0	0	0	0	0	0	0	0	0	0	0	0
A_09_P023311	Euchromatic gene	0	0	0	0	0	0	0	1	0	0	0	0
A_09_P023316	Euchromatic gene	2	2	0	0	2	0	0	0	0	0	1	0
A_09_P023321	Euchromatic gene	0	0	0	0	0	0	0	0	0	0	0	0
A_09_P023326	Euchromatic gene	0	0	0	0	0	0	0	0	0	0	0	0
A_09_P023331	Euchromatic gene	0	0	0	0	0	0	0	0	0	0	0	0
A_09_P023336	Euchromatic gene	0	0	0	0	0	0	0	0	0	0	0	0
A_09_P023341	Euchromatic gene	0	0	0	2	5	1	1	1	2	2	2	0
A_09_P023346	Euchromatic gene	0	0	0	0	0	0	0	0	0	0	0	0
A_09_P023351	Euchromatic gene	0	0	0	0	0	0	1	0	1	0	0	0
A_09_P023356	Euchromatic gene	0	0	0	0	1	0	0	0	1	0	0	0
A_09_P023361	Euchromatic gene	0	0	0	1	0	0	0	0	0	0	0	0
A_09_P023366	Euchromatic gene	1	5	3	3	5	3	2	6	1	0	0	2
A_09_P023371	Euchromatic gene	0	0	1	0	0	0	0	0	0	0	2	0
A_09_P023381	Euchromatic gene	0	0	0	0	0	0	0	0	0	0	0	0
A_09_P023386	Euchromatic gene	0	0	0	0	0	0	0	0	0	0	0	0
A_09_P023391	Euchromatic gene	0	0	0	0	0	0	0	0	0	0	0	0
A_09_P023396	Euchromatic gene	0	0	0	0	0	0	0	0	0	0	0	0
A_09_P023401	Euchromatic gene	0	0	0	0	0	0	0	0	0	0	0	0
A_09_P023411	Euchromatic gene	0	0	0	0	0	0	0	0	0	0	0	0
A_09_P023416	Euchromatic gene	0	0	0	0	0	0	0	0	0	0	1	0
A_09_P023421	Euchromatic gene	0	0	0	0	0	1	0	0	1	3	15	7
A_09_P023426	Euchromatic gene	0	0	0	1	0	2	0	4	0	7	14	10
A_09_P023431	Euchromatic gene	0	0	1	1	0	0	2	0	0	0	1	0
A_09_P023436	Euchromatic gene	0	0	0	0	0	0	0	4	1	0	0	1
A_09_P023441	Euchromatic gene	0	0	0	0	0	0	0	0	0	0	0	0
A_09_P023446	Euchromatic gene	0	0	0	0	0	0	0	0	0	0	0	0
A_09_P023451	Euchromatic gene	0	0	0	0	2	2	0	3	2	7	3	4
A_09_P023456	Euchromatic gene	3	4	0	0	0	0	0	1	0	2	0	1
A_09_P023461	Euchromatic gene	0	0	0	0	0	0	0	0	2	0	0	0
A_09_P023466	Euchromatic gene	1	0	0	1	1	1	0	0	1	0	0	0
A_09_P023471	Euchromatic gene	0	0	0	0	0	0	0	0	0	0	0	0
A_09_P023476	Euchromatic gene	0	0	0	0	0	1	0	0	0	0	0	0
A_09_P023481	Euchromatic gene	2	0	0	0	1	0	0	2	0	1	3	2
A_09_P023486	Euchromatic gene	1	1	0	0	0	0	0	0	0	0	0	0
A_09_P023491	Euchromatic gene	0	0	0	0	0	0	0	0	0	0	0	0
A_09_P023496	Euchromatic gene	0	0	0	0	0	0	0	0	0	0	0	0
A_09_P023501	Euchromatic gene	0	0	0	0	0	0	0	0	1	1	2	0
A_09_P023506	Euchromatic gene	0	0	0	0	0	1	1	4	0	2	4	2
A_09_P023511	Euchromatic gene	1	1	1	0	0	1	1	0	0	0	0	0
A_09_P023521	Euchromatic gene	0	0	0	0	0	0	0	0	0	0	0	0
A_09_P023526	Euchromatic gene	0	0	0	0	0	0	0	0	0	0	0	0
A_09_P023531	Euchromatic gene	0	0	0	0	0	0	0	0	0	0	0	0
A_09_P023536	Euchromatic gene	0	0	0	0	0	0	0	0	0	0	0	0
A_09_P023541	Euchromatic gene	0	0	0	0	0	0	0	0	0	0	0	0
A_09_P023546	Euchromatic gene	0	0	0	0	0	0	0	0	0	0	0	0
A_09_P023551	Euchromatic gene	0	0	0	0	0	0	0	0	0	0	0	0
A_09_P023556	Euchromatic gene	0	0	0	0	0	0	0	0	0	0	0	0
A_09_P023561	Euchromatic gene	0	0	0	0	0	0	0	0	0	0	0	0
A_09_P023566	Euchromatic gene	0	0	0	0	0	0	1	1	0	0	0	1
A_09_P023571	Euchromatic gene	2	1	0	0	0	0	0	1	0	0	0	0
A_09_P023576	Euchromatic gene	0	0	0	0	0	0	0	0	0	0	0	0
A_09_P023581	Euchromatic gene	0	0	0	0	0	0	0	1	0	0	0	0
A_09_P023586	Euchromatic gene	0	0	0	0	0	0	0	0	0	0	0	0
A_09_P023591	Euchromatic gene	1	0	0	0	0	0	0	0	0	0	0	0
A_09_P023596	Euchromatic gene	0	0	0	0	0	0	0	0	0	0	0	0
A_09_P023601	Euchromatic gene	0	0	0	1	1	5	2	2	3	9	9	12
A_09_P023606	Euchromatic gene	0	1	0	0	1	1	1	1	2	1	1	1
A_09_P023611	Euchromatic gene	1	3	3	3	5	1	0	0	0	0	1	0
A_09_P023616	Euchromatic gene	0	0	0	0	1	0	0	0	0	0	0	0
A_09_P023621	Euchromatic gene	0	0	0	0	0	0	1	0	0	0	0	0
A_09_P023626	Euchromatic gene	0	0	0	0	0	0	0	0	0	0	0	0
A_09_P023631	Euchromatic gene	0	0	1	0	0	0	0	0	0	0	0	1
A_09_P023636	Euchromatic gene	1	0	0	0	0	1	0	0	0	0	0	0
A_09_P023641	Euchromatic gene	0	0	0	0	0	0	0	0	0	0	0	0
A_09_P023646	Euchromatic gene	0	0	0	0	0	0	0	0	0	0	0	0
A_09_P023651	Euchromatic gene	0	0	0	0	0	0	0	0	0	0	0	0
A_09_P023656	Euchromatic gene	0	0	0	0	0	0	0	1	0	0	0	0
A_09_P023661	Euchromatic gene	0	0	0	0	0	0	0	0	0	0	0	1
A_09_P023666	Euchromatic gene	0	0	0	0	0	0	0	0	0	0	0	0
A_09_P023671	Euchromatic gene	0	0	0	0	0	0	0	0	0	0	1	0
A_09_P023676	Euchromatic gene	0	0	0	0	0	0	0	1	0	0	0	0
A_09_P023681	Euchromatic gene	1	0	0	1	0	0	0	0	0	0	1	0
A_09_P023686	Euchromatic gene	1	1	5	1	0	0	1	4	2	2	2	2
A_09_P023691	Euchromatic gene	2	1	0	3	2	3	0	0	0	0	0	0
A_09_P023696	Euchromatic gene	1	5	5	0	2	1	5	3	6	6	2	3
A_09_P023701	Euchromatic gene	0	0	0	0	0	0	0	0	0	0	0	0
A_09_P023706	Euchromatic gene	0	0	0	0	0	0	0	0	0	0	0	0
A_09_P023711	Euchromatic gene	0	0	0	0	0	0	0	0	0	0	0	0
A_09_P023716	Euchromatic gene	0	0	0	0	0	0	0	1	0	0	0	0
A_09_P023721	Euchromatic gene	0	0	0	0	0	0	0	0	0	0	0	3
A_09_P023726	Euchromatic gene	0	0	0	0	0	2	0	0	0	0	0	0
A_09_P023731	Euchromatic gene	0	1	1	0	0	0	0	0	0	0	3	0
A_09_P023736	Euchromatic gene	0	0	0	0	1	0	0	1	3	7	2	3
A_09_P023741	Euchromatic gene	0	0	0	0	0	0	0	0	0	0	0	0
A_09_P023746	Euchromatic gene	0	0	0	0	0	0	0	0	0	0	0	0
A_09_P023751	Euchromatic gene	0	0	0	0	0	0	0	0	0	0	0	0
A_09_P023756	Euchromatic gene	0	0	0	0	0	0	0	0	0	0	1	0
A_09_P023761	Euchromatic gene	0	0	0	0	0	0	0	0	0	0	0	0
A_09_P023766	Euchromatic gene	0	0	0	0	0	0	0	0	0	0	0	0
A_09_P023771	Euchromatic gene	2	0	0	1	0	0	1	0	1	2	0	1
A_09_P023776	Euchromatic gene	0	1	1	0	0	4	1	1	0	2	0	0
A_09_P023781	Euchromatic gene	0	1	0	0	0	0	0	0	0	0	1	0
A_09_P023786	Euchromatic gene	0	1	0	0	0	0	0	0	0	0	0	0
A_09_P023791	Euchromatic gene	0	4	0	0	1	0	0	0	0	0	1	1
A_09_P023796	Euchromatic gene	5	6	6	3	1	1	4	2	0	2	0	1
A_09_P023801	Euchromatic gene	0	0	0	0	0	0	0	0	0	0	0	0
A_09_P023806	Euchromatic gene	0	0	0	0	0	0	0	0	0	0	0	0
A_09_P023811	Euchromatic gene	3	4	3	2	1	4	5	1	0	1	1	1
A_09_P023816	Euchromatic gene	1	0	0	0	0	0	0	0	0	0	0	1
A_09_P023821	Euchromatic gene	2	1	0	0	0	0	0	0	1	1	0	0
A_09_P023826	Euchromatic gene	0	0	0	0	0	0	0	0	1	0	0	0
A_09_P023831	Euchromatic gene	0	0	0	0	0	0	0	0	0	0	0	0
A_09_P023836	Euchromatic gene	0	2	0	0	1	6	7	13	3	9	3	5
A_09_P023841	Euchromatic gene	0	1	0	0	0	0	2	0	1	0	0	1
A_09_P023846	Euchromatic gene	0	0	0	0	0	0	0	0	0	0	0	0
A_09_P023851	Euchromatic gene	0	0	0	0	0	0	0	0	0	0	0	0
A_09_P023856	Euchromatic gene	0	0	0	0	0	0	2	0	0	0	3	3
A_09_P023861	Euchromatic gene	0	0	0	0	0	0	0	0	0	0	0	0
A_09_P023866	Euchromatic gene	0	0	0	0	0	0	0	1	2	1	1	1
A_09_P023871	Euchromatic gene	0	0	0	0	0	0	0	0	0	0	0	0
A_09_P023876	Euchromatic gene	0	0	0	0	1	1	2	7	7	6	4	5
A_09_P023881	Euchromatic gene	0	0	0	0	0	0	0	1	1	2	3	3
A_09_P023886	Euchromatic gene	0	0	1	0	0	1	0	0	0	2	0	2
A_09_P023891	Euchromatic gene	0	2	7	2	5	2	6	15	12	20	11	22
A_09_P023896	Euchromatic gene	0	0	0	0	0	0	0	0	0	0	0	0
A_09_P023901	Euchromatic gene	2	0	0	2	2	1	8	5	4	0	0	0
A_09_P023906	Euchromatic gene	1	0	2	2	1	1	0	1	1	0	0	0
A_09_P023911	Euchromatic gene	0	0	0	0	0	0	0	0	0	0	0	0
A_09_P023916	Euchromatic gene	0	0	0	0	0	0	0	0	0	1	0	1
A_09_P023921	Euchromatic gene	0	0	0	4	0	1	0	0	0	0	0	1
A_09_P023926	Euchromatic gene	2	0	0	0	1	0	0	0	3	10	6	2
A_09_P023931	Euchromatic gene	0	0	0	0	0	0	0	0	0	0	0	0
A_09_P023936	Euchromatic gene	0	0	0	0	0	0	0	0	0	0	0	0
A_09_P023941	Euchromatic gene	0	1	0	0	0	0	0	0	0	0	0	1
A_09_P023946	Euchromatic gene	0	3	0	1	0	0	0	0	0	0	0	0
A_09_P023951	Euchromatic gene	0	3	0	0	3	0	0	0	0	0	0	3
A_09_P023956	Euchromatic gene	0	0	2	0	0	1	0	0	0	0	1	1
A_09_P023961	Euchromatic gene	0	0	0	0	2	0	0	1	0	0	0	0
A_09_P023966	Euchromatic gene	0	0	0	1	0	0	0	0	0	0	1	0
A_09_P023971	Euchromatic gene	2	0	3	0	1	0	1	0	0	0	0	0
A_09_P023976	Euchromatic gene	3	2	5	1	4	2	3	4	3	3	6	12
A_09_P023981	Euchromatic gene	7	17	9	7	5	32	6	5	4	0	9	9
A_09_P023986	Euchromatic gene	1	1	0	0	0	0	0	0	0	0	0	0
A_09_P023991	Euchromatic gene	1	6	0	3	0	1	0	1	0	0	0	0
A_09_P023996	Euchromatic gene	0	2	1	1	0	1	4	5	1	0	1	0
A_09_P024001	Euchromatic gene	1	2	0	2	0	2	1	1	1	0	1	1
A_09_P024011	Euchromatic gene	0	0	1	0	3	1	1	3	1	5	6	5
A_09_P024016	Euchromatic gene	0	0	0	0	0	0	2	0	1	3	6	1
A_09_P024026	Euchromatic gene	0	0	0	0	0	0	0	0	0	3	1	0
A_09_P024031	Euchromatic gene	0	0	0	0	0	0	0	0	0	5	7	2
A_09_P024036	Euchromatic gene	0	0	0	0	0	0	0	0	1	0	4	0
A_09_P024041	Euchromatic gene	3	45	17	14	31	24	22	37	22	34	17	28
A_09_P024046	Euchromatic gene	0	0	0	0	0	0	0	2	1	1	0	0
A_09_P024051	Euchromatic gene	7	11	4	4	3	1	1	8	10	7	5	8
A_09_P024056	Euchromatic gene	0	0	0	0	0	0	0	0	0	0	0	0
A_09_P024061	Euchromatic gene	2	3	1	1	1	0	1	1	0	0	0	0
A_09_P024071	Euchromatic gene	6	11	1	3	3	10	5	1	6	6	5	5
A_09_P024076	Euchromatic gene	0	0	0	0	0	0	0	0	0	0	0	0
A_09_P024081	Euchromatic gene	0	0	0	0	0	0	0	0	0	0	0	0
A_09_P024086	Euchromatic gene	0	0	0	0	0	0	0	0	0	0	0	0
A_09_P024091	Euchromatic gene	0	0	0	0	0	0	0	0	0	0	0	0
A_09_P024096	Euchromatic gene	0	0	0	0	0	0	0	0	0	0	0	0
A_09_P024101	Euchromatic gene	0	0	0	0	0	0	0	0	0	0	0	0
A_09_P029426	Euchromatic gene	0	0	0	0	0	0	2	0	2	1	1	1
A_09_P029431	Euchromatic gene	0	1	0	0	0	0	0	0	0	0	0	0
A_09_P029441	Euchromatic gene	4	9	1	4	4	1	0	1	0	1	0	0
A_09_P029466	Euchromatic gene	0	0	0	0	0	0	0	0	0	0	0	0
A_09_P029471	Euchromatic gene	0	0	0	0	0	0	0	0	0	0	0	0
A_09_P029496	Euchromatic gene	27	6	0	2	2	1	2	7	32	80	105	195
A_09_P029586	Euchromatic gene	0	0	0	0	0	0	0	0	0	0	0	0
A_09_P029591	Euchromatic gene	0	0	0	0	0	0	0	0	0	0	0	0
A_09_P029616	Euchromatic gene	0	0	0	0	0	0	0	0	0	0	0	0
A_09_P029651	Euchromatic gene	10	61	34	34	19	10	13	8	2	6	5	5
A_09_P029661	Euchromatic gene	0	0	0	0	0	0	0	1	0	0	0	0
A_09_P029686	Euchromatic gene	0	0	1	0	0	0	0	0	0	0	0	0
A_09_P029831	Euchromatic gene	4	10	3	2	4	1	3	1	1	0	0	2
A_09_P029836	Euchromatic gene	0	0	0	2	0	0	1	0	0	0	0	1
A_09_P029931	Euchromatic gene	0	0	0	0	0	0	0	0	0	0	0	0
A_09_P030046	Euchromatic gene	0	0	0	0	0	3	1	1	0	0	2	4
A_09_P030091	Euchromatic gene	0	0	0	0	0	0	0	0	0	0	0	0
A_09_P030156	Euchromatic gene	0	0	0	1	0	0	0	0	0	4	1	0
A_09_P030176	Euchromatic gene	0	0	0	0	0	0	0	0	0	0	0	0
A_09_P030181	Euchromatic gene	1	12	2	0	0	0	1	5	0	1	0	0
A_09_P030186	Euchromatic gene	1	3	1	2	2	0	1	3	0	2	0	0
A_09_P030216	Euchromatic gene	0	0	3	7	6	7	3	1	0	0	0	1
A_09_P030226	Euchromatic gene	36	38	43	12	19	7	13	18	4	8	5	6
A_09_P030296	Euchromatic gene	0	0	0	0	0	0	0	1	0	0	0	0
A_09_P030301	Euchromatic gene	0	0	0	0	0	0	0	0	2	0	0	0
A_09_P030311	Euchromatic gene	0	0	0	0	0	0	2	0	0	0	0	0
A_09_P030321	Euchromatic gene	0	0	0	0	0	0	0	0	0	0	0	0
A_09_P030381	Euchromatic gene	5	13	19	5	22	7	20	16	4	14	4	1
A_09_P030386	Euchromatic gene	0	0	0	0	0	0	0	0	0	0	0	0
A_09_P030391	Euchromatic gene	0	0	0	0	0	0	0	0	0	0	0	0
A_09_P030461	Euchromatic gene	0	0	0	0	0	1	0	1	0	1	3	2
A_09_P030506	Euchromatic gene	0	3	3	0	0	2	2	2	1	6	6	4
A_09_P030526	Euchromatic gene	0	0	0	0	0	0	0	0	0	0	0	0
A_09_P030631	Euchromatic gene	10	12	18	5	8	1	4	2	0	1	0	0
A_09_P030701	Euchromatic gene	9	2	11	2	6	5	0	1	1	1	0	0
A_09_P030711	Euchromatic gene	0	0	0	0	0	0	0	0	2	4	1	0
A_09_P030716	Euchromatic gene	3	10	5	3	7	2	3	1	2	2	1	2
A_09_P030746	Euchromatic gene	1	4	3	3	4	2	6	1	6	4	2	2
A_09_P030791	Euchromatic gene	1	1	0	1	2	2	0	0	0	0	0	0
A_09_P030801	Euchromatic gene	0	3	1	10	5	4	15	19	7	6	3	4
A_09_P030806	Euchromatic gene	0	0	0	0	0	0	0	0	0	0	0	0
A_09_P030811	Euchromatic gene	0	3	0	1	1	0	0	0	0	0	0	0
A_09_P030816	Euchromatic gene	20	7	9	10	37	21	22	28	7	9	18	17
A_09_P030826	Euchromatic gene	0	0	0	0	0	1	0	0	2	0	1	2
A_09_P030831	Euchromatic gene	0	0	0	0	0	0	0	0	1	0	0	0
A_09_P030866	Euchromatic gene	1	0	0	0	0	0	0	0	0	0	0	0
A_09_P030871	Euchromatic gene	3	0	0	0	2	0	2	1	2	2	8	2
A_09_P030906	Euchromatic gene	2	2	2	0	1	0	0	2	0	0	0	0
A_09_P030916	Euchromatic gene	2	0	1	1	0	0	0	0	0	0	1	0
A_09_P030946	Euchromatic gene	0	1	4	4	1	6	2	12	4	2	0	4
A_09_P031006	Euchromatic gene	0	0	0	0	0	0	0	0	0	0	0	0
A_09_P031041	Euchromatic gene	0	0	0	0	1	0	0	2	0	0	0	1
A_09_P031056	Euchromatic gene	0	0	0	0	0	0	0	0	0	0	0	0
A_09_P031096	Euchromatic gene	0	0	1	1	0	1	0	0	0	0	0	0
A_09_P031106	Euchromatic gene	7	6	2	1	1	1	3	6	6	12	15	12
A_09_P031126	Euchromatic gene	0	0	0	0	0	0	0	0	0	0	0	0
A_09_P031131	Euchromatic gene	0	3	3	3	0	0	0	0	0	0	0	0
A_09_P031151	Euchromatic gene	51	113	101	78	95	150	60	114	72	119	93	113
A_09_P031161	Euchromatic gene	78	196	139	207	129	226	216	333	146	158	150	144
A_09_P031186	Euchromatic gene	0	0	0	0	1	0	0	0	1	0	0	0
A_09_P031191	Euchromatic gene	0	0	0	0	0	0	1	0	0	0	0	0
A_09_P031206	Euchromatic gene	2	0	0	0	0	0	0	2	0	0	0	0
A_09_P031211	Euchromatic gene	0	2	2	6	11	5	16	6	11	11	5	2
A_09_P031236	Euchromatic gene	2	4	1	2	0	1	1	6	5	0	5	3
A_09_P031261	Euchromatic gene	6	2	9	3	6	4	11	11	7	9	4	8
A_09_P031276	Euchromatic gene	0	0	0	0	0	0	0	0	0	0	0	0
A_09_P031286	Euchromatic gene	0	0	0	0	0	0	0	0	2	0	0	0
A_09_P031306	Euchromatic gene	0	1	1	0	0	2	0	3	0	0	1	2
A_09_P031331	Euchromatic gene	7	9	7	11	3	5	5	7	5	1	1	5
A_09_P031361	Euchromatic gene	0	0	0	0	0	0	0	0	0	0	0	2
A_09_P031376	Euchromatic gene	5	3	3	2	1	0	0	0	1	0	0	1
A_09_P031416	Euchromatic gene	0	1	0	0	0	0	0	0	0	0	0	1
A_09_P031466	Euchromatic gene	0	0	0	0	0	0	0	0	0	0	0	0
A_09_P031486	Euchromatic gene	0	0	0	0	0	0	1	1	3	2	4	0
A_09_P031491	Euchromatic gene	0	0	0	0	1	0	21	8	0	0	1	0
A_09_P031521	Euchromatic gene	1	28	14	8	15	9	10	16	9	7	1	5
A_09_P031541	Euchromatic gene	3	14	4	7	6	4	9	6	3	2	10	11
A_09_P031556	Euchromatic gene	0	0	0	0	0	0	0	3	1	0	0	0
A_09_P031566	Euchromatic gene	0	0	0	0	0	0	0	0	0	0	0	0
A_09_P031616	Euchromatic gene	0	0	0	0	0	0	0	0	0	1	0	0
A_09_P031691	Euchromatic gene	0	0	1	0	0	0	0	1	2	1	2	0
A_09_P031696	Euchromatic gene	0	0	0	0	0	0	0	0	0	0	2	0
A_09_P031701	Euchromatic gene	0	0	0	0	0	0	0	0	0	0	0	0
A_09_P031706	Euchromatic gene	2	1	0	0	0	0	0	1	3	1	6	5
A_09_P031711	Euchromatic gene	0	0	0	0	0	0	0	0	0	0	0	0
A_09_P031731	Euchromatic gene	0	0	0	0	0	0	0	0	0	0	1	1
A_09_P031736	Euchromatic gene	3	1	3	0	1	1	1	4	0	0	0	0
A_09_P031806	Euchromatic gene	0	3	0	1	0	1	1	0	0	1	0	0
A_09_P031836	Euchromatic gene	0	0	0	0	0	0	0	0	0	0	0	0
A_09_P031936	Euchromatic gene	6	2	5	1	2	1	1	2	0	0	0	0
A_09_P031941	Euchromatic gene	0	0	1	0	0	0	0	1	0	0	0	0
A_09_P031951	Euchromatic gene	0	2	0	0	2	1	2	2	3	2	2	7
A_09_P031961	Euchromatic gene	0	0	1	0	0	0	1	0	0	0	0	0
A_09_P031981	Euchromatic gene	0	1	0	0	0	0	0	0	1	1	1	1
A_09_P032046	Euchromatic gene	0	0	0	0	0	0	0	0	0	0	0	0
A_09_P032096	Euchromatic gene	2	2	2	7	2	4	4	5	1	0	0	2
A_09_P032136	Euchromatic gene	0	0	0	0	0	0	0	2	1	2	2	1
A_09_P032151	Euchromatic gene	2	5	0	2	0	1	0	0	0	0	0	0
A_09_P032201	Euchromatic gene	0	0	0	0	0	0	0	1	1	3	0	0
A_09_P032206	Euchromatic gene	0	1	1	3	0	0	1	8	2	0	2	0
A_09_P032211	Euchromatic gene	0	0	1	0	1	0	2	0	0	0	1	1
A_09_P032231	Euchromatic gene	0	0	0	0	2	2	1	1	5	2	0	3
A_09_P032241	Euchromatic gene	0	0	0	0	0	0	0	4	4	8	4	12
A_09_P032246	Euchromatic gene	0	0	0	0	0	0	1	2	0	1	0	1
A_09_P032261	Euchromatic gene	0	0	0	0	0	0	0	0	0	0	0	0
A_09_P032266	Euchromatic gene	0	0	0	0	0	0	0	0	0	0	0	0
A_09_P032276	Euchromatic gene	0	0	0	0	0	0	0	0	0	0	0	0
A_09_P032346	Euchromatic gene	0	0	0	0	0	0	0	0	0	1	0	0
A_09_P032351	Euchromatic gene	0	0	0	0	0	0	0	0	2	8	3	8
A_09_P032356	Euchromatic gene	0	0	0	0	0	0	0	0	0	0	0	0
A_09_P032361	Euchromatic gene	0	0	0	0	0	0	0	0	0	0	0	0
A_09_P032391	Euchromatic gene	0	0	0	0	0	0	0	0	0	0	1	0
A_09_P032396	Euchromatic gene	0	0	0	0	0	0	0	0	0	0	0	0
A_09_P032416	Euchromatic gene	0	2	5	0	1	0	0	0	0	0	1	0
A_09_P032421	Euchromatic gene	0	0	0	1	0	0	0	0	1	1	1	0
A_09_P032426	Euchromatic gene	0	0	0	1	0	1	0	0	0	2	1	1
A_09_P032471	Euchromatic gene	0	0	0	0	0	0	0	0	0	0	0	0
A_09_P032486	Euchromatic gene	0	0	0	0	0	0	0	0	0	0	0	0
A_09_P032496	Euchromatic gene	0	0	0	2	0	0	0	0	0	1	0	0
A_09_P032521	Euchromatic gene	0	0	0	0	0	0	0	0	0	1	0	3
A_09_P032616	Euchromatic gene	0	0	0	0	0	0	1	2	4	9	1	5
A_09_P032641	Euchromatic gene	0	0	0	0	0	0	0	0	3	2	0	0
A_09_P032651	Euchromatic gene	0	0	0	0	0	1	0	0	0	0	5	11
A_09_P032716	Euchromatic gene	0	0	0	1	0	0	0	0	0	0	0	0
A_09_P032751	Euchromatic gene	1	0	1	0	0	0	0	0	0	0	0	0
A_09_P032756	Euchromatic gene	0	0	0	0	0	0	0	0	0	0	0	0
A_09_P032786	Euchromatic gene	3	3	1	1	0	0	0	0	0	0	2	3
A_09_P032796	Euchromatic gene	0	0	0	0	0	0	0	0	0	0	0	0
A_09_P032816	Euchromatic gene	1	2	1	0	0	3	2	4	4	2	6	6
A_09_P032821	Euchromatic gene	1	1	1	0	0	0	1	2	1	0	0	0
A_09_P032826	Euchromatic gene	0	1	0	0	0	0	3	4	1	2	0	1
A_09_P032831	Euchromatic gene	2	2	0	1	1	0	0	0	0	0	1	1
A_09_P032846	Euchromatic gene	0	3	0	0	1	1	0	4	3	1	0	0
A_09_P032866	Euchromatic gene	0	1	1	0	0	0	0	0	0	1	0	4
A_09_P032876	Euchromatic gene	0	0	0	0	0	0	0	1	1	0	3	7
A_09_P032901	Euchromatic gene	2	0	1	4	0	0	1	2	0	0	0	0
A_09_P032911	Euchromatic gene	0	5	1	4	2	2	1	3	4	0	1	4
A_09_P032916	Euchromatic gene	0	0	0	1	0	1	0	1	0	0	1	2
A_09_P032921	Euchromatic gene	2	1	1	0	0	0	0	0	0	0	0	0
A_09_P032936	Euchromatic gene	0	0	0	0	0	0	0	0	0	0	0	0
A_09_P032941	Euchromatic gene	0	0	1	0	1	5	1	2	0	3	1	3
A_09_P033036	Euchromatic gene	0	2	0	0	1	1	0	3	0	1	2	0
A_09_P033096	Euchromatic gene	0	1	4	2	0	4	2	2	0	0	0	3
A_09_P033201	Euchromatic gene	0	0	0	0	0	0	0	0	0	0	0	0
A_09_P033206	Euchromatic gene	0	2	0	0	0	0	0	0	0	1	0	0
A_09_P033226	Euchromatic gene	0	0	0	0	0	0	0	0	0	0	0	0
A_09_P041066	Euchromatic gene	0	0	0	0	1	0	5	1	0	0	1	2
A_09_P041086	Euchromatic gene	0	0	0	0	0	0	0	0	0	0	0	0
A_09_P041166	Euchromatic gene	3	1	1	1	0	0	2	3	0	2	0	1
A_09_P041171	Euchromatic gene	0	0	0	0	0	0	1	0	0	0	1	3
A_09_P041176	Euchromatic gene	0	0	1	0	0	0	0	0	0	0	0	0
A_09_P041186	Euchromatic gene	0	0	0	0	0	0	0	0	0	0	0	0
A_09_P041193	Euchromatic gene	1	0	1	0	0	0	1	0	3	5	11	29
A_09_P041201	Euchromatic gene	0	0	0	0	0	0	0	0	0	0	1	0
A_09_P041226	Euchromatic gene	0	0	1	0	0	0	1	4	5	1	0	0
A_09_P041291	Euchromatic gene	1	1	6	1	1	0	1	4	1	2	3	0
A_09_P041316	Euchromatic gene	41	16	2	0	0	2	2	0	0	0	0	0
A_09_P041341	Euchromatic gene	0	0	0	0	0	0	0	0	0	0	0	0
A_09_P041376	Euchromatic gene	0	0	0	0	0	0	0	0	0	0	0	0
A_09_P041396	Euchromatic gene	0	0	0	0	0	0	0	0	0	0	0	0
A_09_P041441	Euchromatic gene	0	1	0	1	0	0	0	0	1	0	0	0
A_09_P041451	Euchromatic gene	2	0	0	0	0	0	0	0	0	0	0	0
A_09_P041456	Euchromatic gene	11	12	1	7	7	4	2	6	2	4	0	4
A_09_P041506	Euchromatic gene	0	16	0	0	0	0	0	0	0	0	0	0
A_09_P041511	Euchromatic gene	0	0	0	0	0	0	0	1	0	0	0	0
A_09_P041516	Euchromatic gene	0	1	3	4	2	2	1	7	4	2	0	0
A_09_P041526	Euchromatic gene	0	0	0	0	0	0	0	0	0	0	0	0
A_09_P041561	Euchromatic gene	1	4	0	0	0	0	4	2	0	1	0	1
A_09_P041571	Euchromatic gene	0	0	0	0	0	0	0	0	0	0	0	0
A_09_P041601	Euchromatic gene	0	4	2	1	1	1	7	5	4	2	10	8
A_09_P041646	Euchromatic gene	0	0	0	1	1	1	0	0	0	2	0	4
A_09_P041651	Euchromatic gene	0	0	0	0	0	1	0	1	3	0	1	1
A_09_P041666	Euchromatic gene	0	0	0	0	1	1	3	13	27	40	23	24
A_09_P041681	Euchromatic gene	1	2	1	4	2	3	2	0	0	0	1	1
A_09_P041686	Euchromatic gene	2	14	12	4	10	2	3	6	1	6	2	4
A_09_P041691	Euchromatic gene	0	0	1	0	0	2	2	0	0	1	0	0
A_09_P041706	Euchromatic gene	0	0	0	0	0	0	0	0	0	1	0	0
A_09_P041711	Euchromatic gene	1	0	2	0	0	0	0	2	2	0	1	0
A_09_P041721	Euchromatic gene	0	0	0	0	0	0	0	0	0	0	0	0
A_09_P041746	Euchromatic gene	3	5	9	4	5	17	2	0	0	1	0	3
A_09_P041761	Euchromatic gene	5	0	0	0	2	0	0	1	0	0	0	0
A_09_P041821	Euchromatic gene	1	4	1	1	4	1	7	7	2	8	3	13
A_09_P041831	Euchromatic gene	0	0	0	0	0	1	0	0	0	0	1	0
A_09_P041856	Euchromatic gene	0	1	0	1	0	0	0	3	0	1	0	1
A_09_P041881	Euchromatic gene	0	0	0	0	0	0	0	0	0	0	0	0
A_09_P041886	Euchromatic gene	0	0	0	0	0	0	0	0	0	0	0	0
A_09_P041891	Euchromatic gene	6	28	5	14	9	17	7	17	45	77	85	100
A_09_P041896	Euchromatic gene	0	0	2	1	1	0	1	0	0	0	0	0
A_09_P041911	Euchromatic gene	1	2	2	1	1	0	6	3	4	2	1	0
A_09_P041926	Euchromatic gene	0	0	0	0	0	0	0	0	0	0	0	0
A_09_P041946	Euchromatic gene	0	0	0	0	0	0	0	0	0	0	0	0
A_09_P041991	Euchromatic gene	1	1	0	0	0	0	2	6	4	2	3	4
A_09_P041996	Euchromatic gene	0	0	0	0	0	0	0	0	0	0	0	0
A_09_P042011	Euchromatic gene	0	0	0	0	0	0	0	0	0	0	0	0
A_09_P042041	Euchromatic gene	0	0	0	0	0	0	0	0	0	0	0	0
A_09_P042056	Euchromatic gene	0	5	6	1	5	5	2	0	3	1	1	2
A_09_P042066	Euchromatic gene	0	0	1	0	0	1	2	0	1	0	0	0
A_09_P042106	Euchromatic gene	0	0	0	0	0	0	0	0	0	0	0	0
A_09_P042151	Euchromatic gene	0	0	0	0	0	1	2	1	0	0	0	1
A_09_P042176	Euchromatic gene	0	1	1	0	1	1	2	1	0	0	0	1
A_09_P042251	Euchromatic gene	23	28	5	3	3	14	15	36	9	29	34	59
A_09_P042261	Euchromatic gene	0	0	0	0	1	0	0	0	1	0	0	0
A_09_P042351	Euchromatic gene	0	0	0	0	0	0	0	0	2	0	0	0
A_09_P042361	Euchromatic gene	0	0	0	0	0	0	0	0	0	0	0	0
A_09_P042411	Euchromatic gene	0	0	0	0	0	0	0	0	0	0	0	1
A_09_P042446	Euchromatic gene	0	0	0	0	0	0	0	1	0	0	0	0
A_09_P042451	Euchromatic gene	3	11	9	4	4	2	6	12	8	5	4	16
A_09_P042461	Euchromatic gene	0	0	0	1	3	0	5	0	2	1	3	2
A_09_P042486	Euchromatic gene	2	4	3	0	0	3	1	1	0	0	0	1
A_09_P042501	Euchromatic gene	0	1	0	0	0	0	0	0	0	0	0	0
A_09_P042511	Euchromatic gene	0	1	0	0	0	0	0	0	0	0	0	0
A_09_P042561	Euchromatic gene	0	0	0	0	0	0	0	0	5	7	7	8
A_09_P042591	Euchromatic gene	19	0	0	0	0	1	1	5	8	10	15	30
A_09_P042596	Euchromatic gene	0	0	0	1	0	0	0	0	0	1	1	8
A_09_P042611	Euchromatic gene	3	3	0	2	1	0	4	0	1	1	5	2
A_09_P042626	Euchromatic gene	20	15	2	6	8	21	16	23	28	15	20	20
A_09_P042671	Euchromatic gene	0	0	0	0	0	1	0	0	0	0	0	0
A_09_P042676	Euchromatic gene	1	29	2	3	0	0	0	0	0	0	0	0
A_09_P042716	Euchromatic gene	2	12	9	8	6	5	6	7	8	2	4	4
A_09_P042946	Euchromatic gene	2	3	2	0	0	1	3	2	2	3	6	0
A_09_P042956	Euchromatic gene	1	0	4	0	1	0	3	6	2	0	0	6
A_09_P043091	Euchromatic gene	0	0	0	0	0	0	0	0	1	0	1	1
A_09_P043096	Euchromatic gene	0	2	0	1	1	1	1	4	2	3	3	0
A_09_P043101	Euchromatic gene	0	0	0	0	0	0	0	0	0	0	0	0
A_09_P043106	Euchromatic gene	4	1	0	4	0	2	0	2	3	0	1	1
A_09_P043111	Euchromatic gene	0	0	0	0	0	0	0	0	0	0	0	0
A_09_P043116	Euchromatic gene	0	0	1	0	0	0	0	1	0	1	0	0
A_09_P043121	Euchromatic gene	0	4	1	0	1	1	1	0	0	1	2	3
A_09_P043126	Euchromatic gene	0	0	0	0	1	1	0	0	1	0	0	0
A_09_P043131	Euchromatic gene	0	1	2	0	0	1	1	2	0	0	0	0
A_09_P043136	Euchromatic gene	0	0	0	1	0	0	3	0	1	0	0	0
A_09_P043141	Euchromatic gene	4	6	12	5	10	11	34	33	15	12	5	7
A_09_P043146	Euchromatic gene	0	1	2	1	5	0	0	1	0	0	0	0
A_09_P043151	Euchromatic gene	0	4	1	0	0	2	0	1	1	1	3	0
A_09_P043156	Euchromatic gene	0	0	1	1	6	0	0	3	1	0	0	0
A_09_P043161	Euchromatic gene	9	23	21	24	12	13	12	15	16	17	9	21
A_09_P043166	Euchromatic gene	0	0	0	0	0	0	0	0	0	0	0	0
A_09_P043171	Euchromatic gene	0	0	0	0	0	0	0	0	2	0	0	0
A_09_P043176	Euchromatic gene	0	0	0	0	0	0	0	0	0	0	0	0
A_09_P043181	Euchromatic gene	0	20	21	13	9	9	32	25	14	15	8	17
A_09_P043186	Euchromatic gene	2	6	2	1	0	5	1	6	4	2	7	7
A_09_P043191	Euchromatic gene	1	1	2	1	1	5	3	3	0	3	0	2
A_09_P043196	Euchromatic gene	0	0	0	0	0	0	1	0	1	0	0	0
A_09_P043206	Euchromatic gene	0	0	0	0	1	0	0	0	0	0	0	1
A_09_P043211	Euchromatic gene	0	0	0	0	1	0	0	0	0	0	0	0
A_09_P043216	Euchromatic gene	3	2	2	1	4	0	1	5	0	2	2	0
A_09_P043226	Euchromatic gene	0	7	9	13	6	5	17	33	25	5	4	3
A_09_P043296	Euchromatic gene	1	0	0	0	0	0	0	0	0	0	0	0
A_09_P043301	Euchromatic gene	1	5	4	12	9	6	4	3	1	1	1	3
A_09_P043311	Euchromatic gene	0	0	0	0	0	0	0	1	1	0	0	0
A_09_P043346	Euchromatic gene	0	4	4	7	4	2	6	3	4	0	0	0
A_09_P043366	Euchromatic gene	0	0	0	0	0	0	0	0	0	0	0	0
A_09_P043441	Euchromatic gene	22	68	30	27	56	20	33	76	15	105	39	116
A_09_P043511	Euchromatic gene	1	0	0	0	0	0	0	0	0	0	0	0
A_09_P043516	Euchromatic gene	1	1	0	0	0	0	0	0	0	0	0	1
A_09_P043576	Euchromatic gene	0	0	0	0	0	1	6	32	38	62	79	52
A_09_P043701	Euchromatic gene	0	0	0	0	0	0	0	0	0	0	0	0
A_09_P043706	Euchromatic gene	0	0	0	0	0	0	0	0	0	0	0	0
A_09_P043761	Euchromatic gene	0	0	0	0	0	0	0	0	0	0	0	0
A_09_P043836	Euchromatic gene	0	0	0	0	0	0	0	0	0	1	0	0
A_09_P043851	Euchromatic gene	0	0	0	0	0	0	0	0	0	0	0	0
A_09_P043861	Euchromatic gene	0	0	0	0	0	0	0	0	0	0	0	0
A_09_P043866	Euchromatic gene	0	0	0	0	0	0	0	0	0	0	0	0
A_09_P043871	Euchromatic gene	0	0	0	0	0	1	0	0	0	0	0	0
A_09_P043906	Euchromatic gene	0	0	1	0	0	0	0	0	0	0	1	0
A_09_P043911	Euchromatic gene	0	2	0	0	1	2	0	1	2	0	0	0
A_09_P043916	Euchromatic gene	0	0	0	0	0	0	0	0	0	0	0	0
A_09_P043956	Euchromatic gene	0	0	0	0	0	0	1	0	0	0	0	0
A_09_P044006	Euchromatic gene	0	0	0	0	0	0	0	0	0	0	0	0
A_09_P044061	Euchromatic gene	0	0	0	0	0	0	0	0	0	1	0	2
A_09_P044086	Euchromatic gene	4	13	6	1	3	1	3	4	2	6	2	4
A_09_P044221	Euchromatic gene	3	8	2	0	3	0	1	0	2	3	7	1
A_09_P044226	Euchromatic gene	0	0	0	0	0	0	0	0	0	0	0	0
A_09_P044246	Euchromatic gene	0	12	6	3	0	2	0	2	0	1	0	1
A_09_P044311	Euchromatic gene	1	2	0	0	1	2	6	19	1	2	0	1
A_09_P044356	Euchromatic gene	4	1	3	0	4	0	3	6	5	4	10	11
A_09_P044376	Euchromatic gene	24	35	7	3	0	6	7	9	17	15	18	41
A_09_P044406	Euchromatic gene	0	0	0	0	0	0	0	0	3	0	0	0
A_09_P044451	Euchromatic gene	0	6	0	0	0	0	0	0	0	0	0	0
A_09_P044476	Euchromatic gene	0	0	0	0	0	0	0	0	0	0	0	1
A_09_P044521	Euchromatic gene	0	0	0	0	0	0	0	0	0	0	0	0
A_09_P044531	Euchromatic gene	4	155	256	162	282	233	121	89	8	6	2	3
A_09_P044586	Euchromatic gene	0	1	0	1	0	0	0	1	0	0	0	4
A_09_P044636	Euchromatic gene	0	0	0	0	0	0	0	0	0	0	0	0
A_09_P044696	Euchromatic gene	0	0	0	0	0	0	0	0	1	1	1	6
A_09_P044771	Euchromatic gene	0	4	10	3	1	0	1	1	0	1	0	0
A_09_P044791	Euchromatic gene	0	0	1	0	0	0	0	0	0	0	0	0
A_09_P044801	Euchromatic gene	0	1	1	0	1	0	3	0	0	0	0	1
A_09_P044851	Euchromatic gene	0	1	0	0	1	0	0	3	4	1	0	1
A_09_P044856	Euchromatic gene	0	0	0	0	0	0	0	1	1	0	1	0
A_09_P044971	Euchromatic gene	7	7	5	7	4	0	8	2	1	0	3	0
A_09_P045041	Euchromatic gene	0	0	0	0	0	0	0	0	0	0	0	0
A_09_P045151	Euchromatic gene	1	3	0	2	2	7	7	17	4	13	11	22
A_09_P045171	Euchromatic gene	3	0	0	13	5	6	2	7	2	3	0	0
A_09_P045216	Euchromatic gene	1	4	12	4	10	7	5	9	8	1	0	4
A_09_P045266	Euchromatic gene	0	0	0	0	0	0	0	0	0	0	0	0
A_09_P045286	Euchromatic gene	0	0	0	1	0	0	0	1	2	0	0	2
A_09_P045301	Euchromatic gene	0	0	0	0	0	0	0	0	1	6	18	22
A_09_P045371	Euchromatic gene	0	1	1	0	1	1	0	0	0	0	0	0
A_09_P045416	Euchromatic gene	0	0	0	0	0	0	0	0	0	0	0	0
A_09_P045571	Euchromatic gene	0	0	0	0	0	2	0	1	0	0	1	0
A_09_P045581	Euchromatic gene	12	2	2	1	1	4	2	5	3	5	1	4
A_09_P045626	Euchromatic gene	0	0	0	0	0	0	0	1	0	0	0	0
A_09_P045701	Euchromatic gene	0	1	4	1	4	3	2	6	7	4	3	5
A_09_P045726	Euchromatic gene	0	3	8	3	3	1	3	4	3	6	5	5
A_09_P045756	Euchromatic gene	0	0	0	0	0	0	0	0	0	0	0	0
A_09_P045811	Euchromatic gene	1	5	2	1	4	2	1	1	3	5	3	0
A_09_P045886	Euchromatic gene	1	1	0	0	2	1	0	0	1	1	0	2
A_09_P045896	Euchromatic gene	0	0	0	0	0	1	0	0	0	3	2	1
A_09_P045941	Euchromatic gene	0	0	7	7	3	1	1	3	1	0	0	1
A_09_P045976	Euchromatic gene	0	0	0	0	0	0	0	0	0	0	0	0
A_09_P046011	Euchromatic gene	0	0	0	0	0	0	0	1	2	2	5	2
A_09_P046026	Euchromatic gene	0	0	0	0	0	0	0	0	0	0	0	0
A_09_P046071	Euchromatic gene	0	0	1	4	1	2	0	1	1	0	0	3
A_09_P046081	Euchromatic gene	1	8	2	0	2	2	4	2	5	3	10	15
A_09_P046086	Euchromatic gene	0	1	2	1	2	0	1	0	1	1	0	0
A_09_P046096	Euchromatic gene	1	3	2	3	0	0	1	1	1	0	1	2
A_09_P046206	Euchromatic gene	0	1	4	1	2	0	1	2	5	8	13	15
A_09_P046346	Euchromatic gene	0	0	0	0	0	0	0	0	0	0	0	0
A_09_P046351	Euchromatic gene	0	0	0	0	0	0	0	0	0	0	0	0
A_09_P046356	Euchromatic gene	0	0	0	0	0	0	0	0	1	0	0	1
A_09_P046371	Euchromatic gene	0	0	2	1	0	0	1	3	0	1	0	3
A_09_P046376	Euchromatic gene	0	0	0	0	0	0	0	0	1	0	0	0
A_09_P046381	Euchromatic gene	0	0	0	0	0	0	0	0	0	1	1	0
A_09_P046436	Euchromatic gene	0	0	1	3	2	1	0	0	3	4	6	3
A_09_P046461	Euchromatic gene	2	0	0	0	0	2	2	2	6	0	1	4
A_09_P046476	Euchromatic gene	0	0	0	0	0	0	0	0	0	0	0	0
A_09_P046546	Euchromatic gene	0	0	0	2	0	1	1	1	0	0	0	0
A_09_P046581	Euchromatic gene	3	2	0	1	0	0	2	1	4	2	0	1
A_09_P046791	Euchromatic gene	0	0	0	0	0	0	0	0	0	0	2	1
A_09_P046821	Euchromatic gene	0	0	0	0	0	0	0	0	0	0	0	0
A_09_P046831	Euchromatic gene	30	15	1	2	6	7	14	17	23	27	51	72
A_09_P046841	Euchromatic gene	0	0	0	0	0	0	0	0	0	0	0	0
A_09_P046876	Euchromatic gene	0	0	0	0	0	0	0	0	0	0	0	0
A_09_P046921	Euchromatic gene	0	0	0	0	0	0	0	0	0	0	0	0
A_09_P046956	Euchromatic gene	0	0	0	0	0	0	0	0	0	0	0	0
A_09_P046966	Euchromatic gene	0	0	3	1	2	4	0	2	4	1	1	0
A_09_P046976	Euchromatic gene	0	0	0	0	0	0	0	0	0	0	0	0
A_09_P047006	Euchromatic gene	0	0	0	0	0	0	2	0	0	0	0	1
A_09_P047196	Euchromatic gene	0	0	1	0	0	0	0	0	0	0	0	0
A_09_P047281	Euchromatic gene	0	0	0	0	0	0	0	0	0	0	0	0
A_09_P047286	Euchromatic gene	0	0	0	0	1	0	0	0	0	0	0	0
A_09_P047366	Euchromatic gene	0	0	0	0	0	0	0	0	0	0	0	0
A_09_P047376	Euchromatic gene	1	3	2	3	0	2	1	1	9	20	23	7
A_09_P047386	Euchromatic gene	0	0	0	0	0	0	3	5	0	1	2	3
A_09_P047431	Euchromatic gene	0	0	0	0	0	0	0	0	0	0	0	1
A_09_P047466	Euchromatic gene	0	0	0	0	0	0	0	0	0	0	0	0
A_09_P047576	Euchromatic gene	7	3	4	4	0	2	5	6	5	3	3	3
A_09_P047591	Euchromatic gene	0	0	0	0	0	0	0	2	0	1	0	0
A_09_P047601	Euchromatic gene	0	0	0	0	0	0	0	0	0	0	0	0
A_09_P047646	Euchromatic gene	0	0	0	0	0	0	0	0	0	0	0	0
A_09_P047666	Euchromatic gene	0	0	0	0	0	0	0	0	0	0	0	0
A_09_P047751	Euchromatic gene	0	0	0	0	0	0	0	0	0	0	0	0
A_09_P047756	Euchromatic gene	16	5	1	9	7	10	13	26	8	12	21	31
A_09_P047781	Euchromatic gene	0	0	0	0	0	0	0	0	0	0	0	0
A_09_P047846	Euchromatic gene	0	0	0	0	0	0	0	0	0	0	0	0
A_09_P047851	Euchromatic gene	0	0	0	0	0	0	0	3	1	4	0	1
A_09_P047856	Euchromatic gene	2	2	3	0	0	0	4	7	5	7	3	10
A_09_P047881	Euchromatic gene	0	0	2	1	0	1	0	1	0	3	1	1
A_09_P047911	Euchromatic gene	0	0	0	0	3	1	3	22	3	6	2	1
A_09_P047976	Euchromatic gene	1	2	0	3	1	2	0	1	1	0	0	0
A_09_P048101	Euchromatic gene	0	2	0	1	1	1	1	0	0	0	0	1
A_09_P048111	Euchromatic gene	22	26	35	44	45	60	48	56	21	23	14	12
[truncated: 37,156 more rows]
