# Supplementary material for: Mapping the pericentric heterochromatin by comparative genomic hybridization analysis and chromosome deletions in Drosophila melanogaster
Source: HighWire-hosted journal article supplement (doi:10.1101/gr.137406.112), 2012-06-28
Supplement: Supplemental_Table_13-modENCODE_ChIP_Seq.xlsx [file Supplemental_Table_13-modENCODE_ChIP_Seq.xlsx]

## Sheet: Sheet1
Probe ID	Category	H3K4Me1	H3K4Me1	H3K4Me1	H3K4Me1	H3K4Me1	H3K4Me1	H3K4Me1	H3K4Me1	H3K4Me1	H3K4Me1	H3K4Me1	H3K4Me1	H3K9Ac	H3K9Ac	H3K9Ac	H3K9Ac	H3K9Ac	H3K9Ac	H3K9Ac	H3K9Ac	H3K9Ac	H3K9Ac	H3K9Ac	H3K9Ac	H3K9Me3	H3K9Me3	H3K9Me3	H3K9Me3	H3K9Me3	H3K9Me3	H3K9Me3	H3K9Me3	H3K9Me3	H3K9Me3	H3K9Me3	H3K9Me3	H3K27Ac	H3K27Ac	H3K27Ac	H3K27Ac	H3K27Ac	H3K27Ac	H3K27Ac	H3K27Ac	H3K27Ac	H3K27Ac	H3K27Ac	H3K27Ac
		E0-4	E4-8	E8-12	E12-16	E16-20	E20-24	L1	L2	L3	Pupae	Adult Female	Adult Male	E0-4	E4-8	E8-12	E12-16	E16-20	E20-24	L1	L2	L3	Pupae	Adult Female	Adult Male	E0-4	E4-8	E8-12	E12-16	E16-20	E20-24	L1	L2	L3	Pupae	Adult Female	Adult Male	E0-4	E4-8	E8-12	E12-16	E16-20	E20-24	L1	L2	L3	Pupae	Adult Female	Adult Male
>contig10038|size158|read34|cov7.69_5533	H-probe	0	0	0	0	0	0	0	0	0	0	0	0	0	0	0	0	0	0	0	0	0	0	0		0	0	0	0	0	0	0	0		0			0	0	0	0	0	0	0	0	0	0	0	0
>contig10067|size93|read24|cov9.17_1270	H-probe	0	0	0	0	0	0	0	0	0	0	0	0	0	0	0	0	0	0	0	0	0	0	0		0	0	0	0	0	0	0	0		0			0	0	0	0	0	0	0	0	0	0	0	0
>contig10115|size74|read16|cov7.65_9106	H-probe	0	0	0	0	0	0	0	0	0	0	0	0	0	0	0	0	0	0	0	0	0	0	0		0	0	0	0	0	0	0	0		0			0	0	0	0	0	0	0	0	0	0	0	0
>contig10250|size67|read24|cov12.81_7219	H-probe	0	0	0	0	0	0	0	0	0	0	0	0	0	0	0	0	0	0	0	0	0	0	0		0	0	0	0	0	0	0	0		0			0	0	0	0	0	0	0	0	0	0	0	0
>contig1036|size141|read62|cov15.54_53320	H-probe	0	0	0	0	0	0	0	0	0	0	0	0	0	0	0	0	0	0	0	0	0	0	0		0	0	0	0	0	0	0	0		0			0	0	0	0	0	0	0	0	0	0	0	0
>contig10419|size338|read91|cov9.36_233355	H-probe	0	0	0	0	0	0	0	0	0	0	0	0	0	0	0	0	0	0	0	0	0	0	0		0	0	0	0	0	0	0	0		0			0	0	0	0	0	0	0	0	0	0	0	0
>contig10452|size68|read12|cov6.00_1381	H-probe	0	0	0	0	0	0	0	0	0	0	0	0	0	0	0	0	0	0	0	0	0	0	0		0	0	0	0	0	0	0	0		0			0	0	0	0	0	0	0	0	0	0	0	0
>contig10532|size84|read15|cov6.39_1440	H-probe	0	0	0	0	0	0	0	0	0	0	0	0	0	0	0	0	0	0	0	0	0	0	0		0	0	0	0	0	0	0	0		0			0	0	0	0	0	0	0	0	0	0	0	0
>contig1061|size546|read323|cov20.66_4318	H-probe	0	0	0	0	0	0	0	0	0	0	0	0	0	0	0	0	0	0	0	0	0	0	0		0	0	0	0	0	0	0	0		0			0	0	0	0	0	0	0	0	0	0	0	0
>contig10655|size61|read14|cov8.05_1540	H-probe	0	0	0	0	0	0	0	0	0	0	0	0	0	0	0	0	0	0	0	0	0	0	0		0	0	0	0	0	0	0	0		0			0	0	0	0	0	0	0	0	0	0	0	0
>contig10660|size60|read19|cov11.12_0545	H-probe	-3.54881	-1.29017	-2.33895	-0.958014	-6.43109	-4.17511	-4.10719	-4.47968	-0.0183683	-3.2031	-1.64365	-3.96648	-3.54881	-3.1036	-3.38109	-3.56487	-5.24786	-7.19412	0.342833	-2.90683	-0.852759	-3.2031	-1.64365		-0.68492	-1.33226	-1.90348	-2.29758	-3.6121	-4.54288	-4.10719	-2.95905		0.519095			-2.50565	-2.23234	-2.31906	-3.56487	-7.20986	-7.44056	-2.82715	-0.932343	-0.174382	-0.817096	-1.64365	-2.41093
>contig10703|size128|read51|cov13.53_12575	H-probe	0	0	0	0	0	0	0	0	0	0	0	0	0	0	0	0	0	0	0	0	0	0	0		0	0	0	0	0	0	0	0		0			0	0	0	0	0	0	0	0	0	0	0	0
>contig10759|size60|read18|cov10.75_0617	H-probe	0	0	0	0	0	0	0	0	0	0	0	0	0	0	0	0	0	0	0	0	0	0	0		0	0	0	0	0	0	0	0		0			0	0	0	0	0	0	0	0	0	0	0	0
>contig1076|size67|read39|cov20.73_5627	H-probe	-1.93437	1.04378	-1.51277	0.567496	-3.84234	-2.01215	-0.777773	-1.50488	1.42162	-3.23166	3.54123	-3.79377	-2.04344	-0.713636	-1.23144	-0.656992	-3.13959	-3.69028	-0.287881	-1.64074	-0.237414	-1.13101	0		1.95024	2.41803	1.02941	2.0225	-1.60777	-2.6748	-0.1642	0.241759		0.913399			-0.922902	-0.396768	-1.47749	-0.434968	-4.46241	-3.51388	-1.6264	0.889303	-0.480457	-1.03483	0.895964	-1.50721
>contig1078|size279|read110|cov14.04_11316	H-probe	0	0	0	0	0	0	0	0	0	0	0	0	0	0	0	0	0	0	0	0	0	0	0		0	0	0	0	0	0	0	0		0			0	0	0	0	0	0	0	0	0	0	0	0
>contig10816|size92|read27|cov10.14_12669	H-probe	0	0	0	0	0	0	0	0	0	0	0	0	0	0	0	0	0	0	0	0	0	0	0		0	0	0	0	0	0	0	0		0			0	0	0	0	0	0	0	0	0	0	0	0
>contig11068|size110|read30|cov9.53_30874	H-probe	0	0	0	0	0	0	0	0	0	0	0	0	0	0	0	0	0	0	0	0	0	0	0		0	0	0	0	0	0	0	0		0			0	0	0	0	0	0	0	0	0	0	0	0
>contig11098|size60|read10|cov5.75_0894	H-probe	0	0	0	0	0	0	0	0	0	0	0	0	0	0	0	0	0	0	0	0	0	0	0		0	0	0	0	0	0	0	0		0			0	0	0	0	0	0	0	0	0	0	0	0
>contig1118|size81|read29|cov12.75_7970	H-probe	0	0	0	0	0	0	0	0	0	0	0	0	0	0	0	0	0	0	0	0	0	0	0		0	0	0	0	0	0	0	0		0			0	0	0	0	0	0	0	0	0	0	0	0
>contig1128|size63|read26|cov14.33_01050	H-probe	0	0	0	0	0	0	0	0	0	0	0	0	0	0	0	0	0	0	0	0	0	0	0		0	0	0	0	0	0	0	0		0			0	0	0	0	0	0	0	0	0	0	0	0
>contig11352|size83|read36|cov14.55_81104	H-probe	0	-0.555822	-0.579908	-0.400107	0	-3.04163	-0.788482	0.81248	-0.361446	-1.02106	0	-1.13705	0	-0.555822	-0.579908	-0.400107	0	-3.04163	-0.788482	0	0.621869	0.185218	0		0	-0.555822	0.897701	0.368431	0	-3.04163	-0.788482	0		-1.02106			0	0.195368	-0.579908	-0.400107	0	-2.21893	-0.788482	0.395779	-0.361446	-1.02106	0	1.14951
>contig1140|size77|read32|cov14.64_41152	H-probe	0	0	0	0	0	0	0	0	0	0	0	0	0	0	0	0	0	0	0	0	0	0	0		0	0	0	0	0	0	0	0		0			0	0	0	0	0	0	0	0	0	0	0	0
>contig11451|size66|read10|cov5.45_41178	H-probe	0	0	0	0	0	0	0	0	0	0	0	0	0	0	0	0	0	0	0	0	0	0	0		0	1.20503	0	0	0	0	0	0		0			0	0	0	0	0	0	0	0	0	0	0	0
>contig11697|size71|read25|cov12.51_41383	H-probe	0	0	0	0	0	0	0	0	0	0	0	0	0	0	0	0	0	0	0	0	0	0	0		0	0	0	0	0	0	0	0		0			0	0	0	0	0	0	0	0	0	0	0	0
>contig11705|size204|read92|cov15.29_2028	H-probe	0	0	0	0	0	0	0	0	0	0	0	0	0	0	0	0	0	0	0	0	0	0	0		0	0	0	0	0	0	0	0		0			0	0	0	0	0	0	0	0	0	0	0	0
>contig11705|size204|read92|cov15.29_241393	H-probe	0	0	0	0	0	0	0	0	0	0	0	0	0	0	0	0	0	0	0	0	0	0	0		0	0	0	0	0	0	0	0		0			0	0	0	0	0	0	0	0	0	0	0	0
>contig11705|size204|read92|cov15.29_2727	H-probe	0	0	0	0	0	0	0	0	0	0	0	0	0	0	0	0	0	0	0	0	0	0	0		0	0	0	0	0	0	0	0		0			0	0	0	0	0	0	0	0	0	0	0	0
>contig11761|size66|read15|cov7.67_01432	H-probe	-2.48207	-1.42317	-2.48289	-2.26076	-5.3476	-2.80859	-2.30658	-1.91029	-0.628358	-2.13739	0	-3.29977	-2.48207	-2.17772	-1.85127	-2.26076	-4.56184	-5.8276	1.26935	-1.91029	-0.262239	-2.13739	0		-0.107314	-1.98576	-1.00529	-2.26076	-2.86903	-4.41962	-0.604228	-1.91029		0.993879			-2.48207	-2.22951	-2.48289	-2.26076	-4.61335	-5.55338	-1.02653	0.355432	0.321496	-2.13739	0	-3.29977
>contig11768|size78|read26|cov11.72_111439	H-probe	0	0	0	0	0	0	0	0	0	0	0	0	0	0	0	0	0	0	0	0	0	0	0		0	0	0	0	0	0	0	0		0			0	0	0	0	0	0	0	0	0	0	0	0
>contig11823|size469|read171|cov12.78_2731475	H-probe	0	0	0	0	0	0	0	0	0	0	0	0	0	0	0	0	0	0	0	0	0	0	0		0	0	0	0	0	0	0	0		0			0	0	0	0	0	0	0	0	0	0	0	0
>contig11870|size66|read20|cov10.82_01515	H-probe	0	0	0	0	0	0	0	0	0	0	0	0	0	0	0	0	0	0	0	0	0	0	0		0	0	0	0	0	0	0	0		0			0	0	0	0	0	0	0	0	0	0	0	0
>contig11898|size73|read22|cov10.74_01530	H-probe	0	0	0	0	0	0	0	0	0	0	0	0	0	0	0	0	0	0	0	0	0	0	0		0	0	0	0	0	0	0	0		0			0	0	0	0	0	0	0	0	0	0	0	0
>contig12050|size78|read23|cov10.29_91644	H-probe	0	0	0	0	0	0	0	0	0	0	0	0	0	0	0	0	0	0	0	0	0	0	0		0	0	0	0	0	0	0	0		0			0	0	0	0	0	0	0	0	0	0	0	0
>contig1207|size171|read81|cov16.36_431671	H-probe	0	0	0	0	0	0	0	0	0	0	0	0	0	0	0	0	0	0	0	0	0	0	0		0	0	0	0	0	0	0	0		0			0	0	0	0	0	0	0	0	0	0	0	0
>contig12164|size102|read37|cov12.77_421747	H-probe	0	0	0	0	0	0	0	0	0	0	0	0	0	0	0	0	0	0	0	0	0	0	0		0	0	0	0	0	0	0	0		0			0	0	0	0	0	0	0	0	0	0	0	0
>contig12282|size83|read29|cov12.53_91839	H-probe	0	0	0	0	0	0	0	0	0	0	0	0	0	0	0	0	0	0	0	0	0	0	0		0	0	0	0	0	0	0	0		0			0	0	0	0	0	0	0	0	0	0	0	0
>contig12340|size82|read17|cov7.06_161878	H-probe	0	0	0	0	0	0	0	0	0	0	0	0	0	0	0	0	0	0	0	0	0	0	0		0	0	0	0	0	0	0	0		0			0	0	0	0	0	0	0	0	0	0	0	0
>contig12419|size112|read27|cov8.68_281944	H-probe	0	0.784212	0.613195	0	0	0.84832	1.43816	0	1.8415	-0.391157	0	0	1.03444	0.782686	0	0	0	0	0	0	0.983315	-0.391157	0		1.62912	0.724835	1.13087	0.768538	0	0	0	0.698714		-0.391157			0	0	0	0	0	0	0	0.395779	0	-0.391157	0	0
>contig12447|size147|read57|cov13.13_111972	H-probe	0	0	0	0	0	0	0	0	0	0	0	0	0	0	0	0	0	0	0	0	0	0	0		0	0	0	0	0	0	0	0		0			0	0	0	0	0	0	0	0	0	0	0	0
>contig12582|size61|read11|cov6.30_12079	H-probe	0	0	0	0	0	0.84832	0	0	0	0	0	0	0	0	0.631622	0	0	0	0.99508	0	0	0	0		0	0	0	0	0	0	0	0		0			0	0	0	0	0	0	0	0	0	0	0	0
>contig12718|size63|read12|cov6.49_32180	H-probe	0	0	0	0	0	0	0	0	0	0	0	0	0	0	0	0	0	0	0	0	0	0	0		0	0	0	0	0	0	0	0		0			0	0	0	0	0	0	0	0	0	0	0	0
>contig12729|size69|read16|cov8.04_02190	H-probe	0	0.784212	-0.521246	0	0	0.84832	0	0	0	-0.30955	0	1.68254	0	0	-0.521246	0	0	0	0	0	0	-0.30955	0		1.03325	0.724835	0.152271	0	0.72539	0	1.70235	0.698714		-0.30955			0	0	-0.521246	0	0	0	0	0.706028	0.753132	-0.30955	0	0
>contig12891|size70|read17|cov8.71_42319	H-probe	0	0	0	0	0	0	0	0	0	0	0	0	0	0	0	0	0	0	0	0	0	0	0		0	0	0	0	0	0	0	0		0			0	0	0	0	0	0	0	0	0	0	0	0
>contig12937|size84|read19|cov7.25_102352	H-probe	0	0	0	0	0	0	0	0	0	0	0	0	0	0	0	0	0	0	0	0	0	0	0		0	0	0	0	0	0	0	0		0			0	0	0	0	0	0	0	0	0	0	0	0
>contig12941|size85|read25|cov9.59_252356	H-probe	0	0	0	0	0	0	0	0	0	0	0	0	0	0	0	0	0	0	0	0	0	0	0		0	0	0	0	0	0	0	0		0			0	0	0	0	0	0	0	0	0	0	0	0
>contig13010|size72|read11|cov5.46_02405	H-probe	0	0	0	0	0	0	0	0	0	0	0	0	0	0	0	0	0	0	0	0	0	0	0		0	0	0	0	0	0	0	0		0			0	0	0	0	0	0	0	0	0	0	0	0
>contig13129|size66|read18|cov6.88_02500	H-probe	0	0	0	0	0	0	0	0	0	0	0	0	0	0	0	0	0	0	0	0	0	0	0		0	0	0	0	0	0	0	0		0			0	0	0	0	0	0	0	0	0	0	0	0
>contig13302|size106|read15|cov5.02_282624	H-probe	0	0	0	0	0	0	0	0	0	0	0	0	0	0	0	0	0	0	0	0	0	0	0		0	0	0	0	0	0	0	0		0			0	0	0	0	0	0	0	0	0	0	0	0
>contig13305|size71|read13|cov6.32_82627	H-probe	0	0	-0.521246	0	0	0.84832	0	0	0	0	0	0	0	0	-0.521246	0	0	0	0	0	0	0	0		1.03325	0.724835	0.152271	0	0	0	0	0		1.07647			0	0	-0.521246	0	0	0	0	0	0	0	0	0
>contig13379|size61|read12|cov6.95_12681	H-probe	0	0	0	0	0	0	0	0	0	0	0	0	0	0	0	0	0	0	0	0	0	0	0		0	0	0	0	0	0	0	0		0			0	0	0	0	0	0	0	0	0	0	0	0
>contig13429|size140|read55|cov12.76_312716	H-probe	0	0	0	0	0	0	0	0	0	0	0	0	0	0	0	0	0	0	0	0	0	0	0		0	0	0	0	0	0	0	0		0			0	0	0	0	0	0	0	0	0	0	0	0
>contig13535|size114|read37|cov11.37_242800	H-probe	0	0.757598	-0.948562	-0.400107	0	0.84832	-0.511486	-0.0980096	0.300809	-1.07144	0	-0.748964	0	0.755447	-0.948562	0.403635	0	0	1.06691	0.0804323	-0.895746	-1.07144	0		0	0.673206	1.04231	0.86718	1.56562	1.33492	-0.511486	0.893658		-1.07144			0	-0.531826	0.113468	0.37589	0.734246	0	1.43597	-0.185906	0.349687	0.567117	0.895964	2.02046
>contig13634|size60|read16|cov9.13_02873	H-probe	0	0	0	0	0	0	0	0	0	0	0	0	0	0	0	0	0	0	0	0	0	0	0		0	0	0	0	0	0	0	0		0			0	0	0	0	0	0	0	0	0	0	0	0
>contig13748|size82|read20|cov8.65_142951	H-probe	0	0	0	0	0	0	0	0	0	0	0	0	0	0	0	0	0	0	0	0	0	0	0		0	0	0	0	0	0	0	0		0			0	0	0	0	0	0	0	0	0	0	0	0
>contig13855|size65|read17|cov9.15_03026	H-probe	0	0	0	0	0	0	0	0	0	0	0	0	0	0	0	0	0	0	0	0	0	0	0		0	0	0	0	0	0	0	0		0			0	0	0	0	0	0	0	0	0	0	0	0
>contig1388|size65|read47|cov25.52_53049	H-probe	0	0	0	0	0	0	0	0	0	0	0	0	0	0	0	0	0	0	0	0	0	0	0		0	0	0	0	0	0	0	0		0			0	0	0	0	0	0	0	0	0	0	0	0
>contig13947|size78|read15|cov6.86_113096	H-probe	0	0	0	0	0	0	0	0	0	0	0	0	0	0	0	0	0	0	0	0	0	0	0		0	0	0	0	0	0	0	0		0			0	0	0	0	0	0	0	0	0	0	0	0
>contig13979|size75|read16|cov7.57_13115	H-probe	0	0	0	0	0	0	0	0	0	0	0	0	0	0	0	0	0	0	0	0	0	0	0		0	0	0	0	0	0	0	0		0			0	0	0	0	0	0	0	0	0	0	0	0
>contig14119|size77|read26|cov11.84_03206	H-probe	0	0	0	0	0	0	0	0	0	0	0	0	0	0	0	0	0	0	0	0	0	0	0		0	0	0	0	0	0	0	0		0			0	0	0	0	0	0	0	0	0	0	0	0
>contig14158|size84|read12|cov5.11_233233	H-probe	0	-0.304515	0	0	-1.82179	0	1.11631	0	0	0	0	-0.422548	0	-0.304515	0	0	-1.82179	0	0.673232	0	0	0	0		0	-0.304515	0.673517	0.768538	-1.0964	0	1.3805	1.16743		1.07647			0	-0.304515	0	0	-1.82179	0	-0.321848	0.706028	0	0	0	-0.422548
>contig14228|size154|read43|cov9.39_673285	H-probe	0	0.269098	-0.579908	0	0	0.84832	0	0	-0.253327	0	0	0	1.03444	-0.515114	0.0517139	0	0.785761	0	0	0	-0.253327	0	0		0	-0.515114	0.0936087	0.768538	0	0	1.70235	0		1.07647			1.04316	-0.515114	-0.579908	0	0	0	0	0	-0.253327	0	0	0
>contig14469|size73|read20|cov9.75_113444	H-probe	0	0	0	0	0	0	0	0	0	0	0	0	0	0	0	0	0	0	0	0	0	0	0		0	0	0	0	0	0	0	0		0			0	0	0	0	0	0	0	0	0	0	0	0
>contig14591|size100|read17|cov5.99_183531	H-probe	0	0	0	0	0	0	0	0	0	0	0	0	0	0	0	0	0	0	0	0	0	0	0		0	0	0	0	0	0	0	0		0			0	0	0	0	0	0	0	0	0	0	0	0
>contig14707|size122|read50|cov14.63_83610	H-probe	0	0.508306	0.155286	-0.479388	0	0	0	0.81248	-1.16778	-0.391157	0	0	0	-0.275907	-0.853978	0.837479	0.785761	0	0	0	-1.16778	-0.391157	0		2.37476	1.57643	-1.4856	1.45198	1.20583	1.33492	0	1.52063		0.685313			0	0.966764	-1.4856	0.798447	0	0.822693	0	0.724583	-1.16778	-0.391157	0	1.55555
>contig1483|size69|read14|cov7.29_73694	H-probe	-5.84539	-3.27223	-3.28672	-2.55161	-7.39803	-4.12829	-2.13526	-6.41318	-0.717635	-9.38664	0.746493	-7.97226	-6.769	-6.13587	-4.05335	-5.98193	-6.33234	-6.66061	0.38037	-2.37951	-1.11872	-6.74749	4.0275		-0.177352	-1.99799	-2.27296	-3.14546	-4.18051	-5.1407	-3.07866	-4.5043		-0.257693			-4.15377	-3.87748	-4.57575	-3.93427	-7.73986	-7.80043	-3.52887	-1.02667	-0.0334651	-2.96808	-2.79473	-4.37792
>contig1528|size175|read67|cov13.69_504001	H-probe	0	1.37794	0	-0.713002	0	-1.77036	1.43816	0	0	0	0	1.68254	0	1.00234	0.631622	-0.713002	0	-1.77036	0	0	0	1.20628	0		0	-0.284931	2.19211	0.554285	1.20583	-1.77036	0	0.698714		0			0	0.466259	0	0.0629955	0.734246	-0.947668	0	0	0	0	0	0
>contig153|size62|read40|cov22.35_04086	H-probe	0	0	0	0	0	0	0	0	0	0	0	0	0	0	0	0	0	0	0	0	0	0	0		0	0	0	0	0	0	0	0		0			0	0	0	0	0	0	0	0	0	0	0	0
>contig15334|size66|read18|cov9.56_34035	H-probe	0	0	0	0	0	0	0	0	0	0	0	0	0	0	0	0	0	0	0	0	0	0	0		0	0	0	0	0	0	0	0		0			0	0	0	0	0	0	0	0	0	0	0	0
>contig15420|size85|read26|cov10.34_164099	H-probe	0	0	0	0	0	0	0	0	0	0	0	0	0	0	0	0	0	0	0	0	0	0	0		0	0	0	0	0	0	0	0		0			0	0	0	0	0	0	0	0	0	0	0	0
>contig15469|size64|read18|cov9.77_04132	H-probe	0	0	0	0	0	0	0	0	0	0	0	0	0	0	0	0	0	0	0	0	0	0	0		0	0	0	0	0	0	0	0		0			0	0	0	0	0	0	0	0	0	0	0	0
>contig15472|size127|read26|cov7.28_534136	H-probe	0	0	0	0	0	0	0	0	0	0	0	0	0	0	0	0	0	0	0	0	0	0	0		0	0	0	0	0	0	0	0		0			0	0	0	0	0	0	0	0	0	0	0	0
>contig15493|size87|read24|cov9.41_74152	H-probe	0	0	0	0	0	0	0	0	0	0	0	0	0	0	0	0	0	0	0	0	0	0	0		0	0	0	0	0	0	0	0		0			0	0	0	0	0	0	0	0	0	0	0	0
>contig15494|size70|read19|cov9.23_44153	H-probe	0	0	0	0	0	0	0	0	0	0	0	0	0	0	0	0	0	0	0	0	0	0	0		0	0	0	0	0	0	0	0		0			0	0	0	0	0	0	0	0	0	0	0	0
>contig15500|size64|read15|cov8.33_34157	H-probe	0	0	0	0	0	0	0	0	0	0	0	0	0	0	0	0	0	0	0	0	0	0	0		0	0	0	0	0	0	0	0		0			0	0	0	0	0	0	0	0	0	0	0	0
>contig1576|size92|read85|cov29.53_94354	H-probe	-1.07494	1.23217	-2.39432	0.424937	-4.28973	-1.02549	0.160018	0.261465	-0.342854	-3.29333	0.5251	-2.82271	-0.391016	-0.94376	-0.702841	-0.738421	-1.95634	-3.01123	0.113617	0.278081	-0.49865	-1.07336	-0.379223		1.3272	1.38675	-0.565918	0.473986	-0.262376	-2.65737	0.970294	1.91333		1.22914			0.14962	0.739198	-2.08154	-2.01325	-2.22683	-2.70354	-1.2876	2.02207	0.23998	-1.14897	-1.6956	-1.66807
>contig15895|size89|read28|cov11.20_264436	H-probe	0	0	0	0	0	0	0	0	0	0	0	0	0	0	0	0	0	0	0	0	0	0	0		0	0	0	0	0	0	0	0		0			0	0	0	0	0	0	0	0	0	0	0	0
>contig15923|size79|read25|cov11.19_104448	H-probe	0	0	0	0	0	0	0	0	0	0	0	0	0	0	0	0	0	0	0	0	0	0	0		0	0	0	0	0	0	0	0		0			0	0	0	0	0	0	0	0	0	0	0	0
>contig15939|size78|read21|cov9.38_84458	H-probe	0	0	0	0	0	0	0	0	0	0	0	0	0	0	0	0	0	0	0	0	0	0	0		0	0	0	0	0	0	0	0		0			0	0	0	0	0	0	0	0	0	0	0	0
>contig15956|size60|read12|cov7.18_04465	H-probe	0	0	0	0	0	0	0	0	0	0	0	0	0	0	0	0	0	0	0	0	0	0	0		0	0	0	0	0	0	0	0		0			0	0	0	0	0	0	0	0	0	0	0	0
>contig1603|size99|read25|cov8.43_264526	H-probe	-1.33857	-0.531826	-0.521246	-0.777163	-0.883673	-1.77036	-0.807184	0	0.943227	-0.698565	0	0	-1.33857	-0.531826	-0.521246	-0.777163	-0.883673	-0.0939309	0.187896	0	0.729988	-0.698565	0		0.290555	1.32051	0.152271	-0.777163	-0.158283	-1.77036	-0.807184	0		0.377905			-0.295407	0.710845	-0.521246	-0.777163	-0.883673	-1.77036	-0.807184	0	-0.253327	-0.698565	0	0
>contig16124|size66|read14|cov7.61_64594	H-probe	0	0	0	0	0	0	0	0	0	0	0	0	0	0	0	0	0	0	0	0	0	0	0		0	0	0	0	0	0	0	0		0			0	0	0	0	0	0	0	0	0	0	0	0
>contig16139|size64|read34|cov17.53_44605	H-probe	-1.40111	0.183031	-2.57672	0.816209	-4.41153	-2.37837	0.443722	-1.91029	-0.439071	-2.15343	0	0.0697932	-2.51437	-1.47984	-2.57672	-0.479388	-3.62577	-5.54895	-0.121765	-0.337446	-1.63563	-2.15343	0		0.761477	0.3725	-0.81977	0.289151	-3.20571	-2.72307	1.91708	-0.742861		0.977844			-1.90658	-0.237167	-2.57672	-0.479388	-4.41153	-4.20559	0.24729	-1.51451	-1.63563	0.232579	0	1.80643
>contig16154|size61|read12|cov6.67_14618	H-probe	0	0	0	0	0	0	0	0	0	0	0	0	0	0	0	0	0	0	0	0	0	0	0		0	0	0	0	0	0	0	0		0			0	0	0	0	0	0	0	0	0	0	0	0
>contig16239|size232|read55|cov8.48_1634673	H-probe	0	0	0	0	0	0	0	0	0	0	0	0	0	0	0	0	0	0	0	0	0	0	0		0	0	0	0	0	0	0	0		0			0	0	0	0	0	0	0	0	0	0	0	0
>contig16328|size65|read12|cov6.40_24728	H-probe	0	-1.52299	-1.57715	-0.568124	-5.84848	-3.49741	-2.89785	-1.05108	1.83356	-1.68975	0	-3.24904	1.03444	-3.72799	-1.21444	-2.23814	-4.55688	-5.93989	0.0935327	-0.290716	-0.262239	-1.68975	0		1.03325	-2.1633	-1.14168	-1.4696	-3.75535	-7.00903	-1.1955	-1.86356		2.03245			0	-1.19636	-2.61929	-2.23814	-5.84848	-7.00903	-1.6178	0.672031	0.52917	-0.64937	0	-3.24904
>contig1633|size66|read13|cov6.42_44736	H-probe	0	0	0	0	0	0	0	0	0	0	0	0	0	0	0	0	0	0	0	0	0	0	0		0	0	0	0	0	0	0	0		0			0	0	0	0	0	0	0	0	0	0	0	0
>contig16353|size187|read78|cov14.44_584743	H-probe	0	0	0	0	0	0	0	0	0	0	0	0	0	0	0	0	0	0	0	0	0	0	0		0	0	0	0	0	0	0	0		0			0	0	0	0	0	0	0	0	0	0	0	0
>contig16580|size88|read27|cov10.83_214903	H-probe	0	0	0	0	0	0	0	0	0	0	0	0	0	0	0	0	0	0	0	0	0	0	0		0	0	0	0	0	0	0	0		0			0	0	0	0	0	0	0	0	0	0	0	0
>contig16607|size72|read22|cov10.97_94921	H-probe	0	-0.275907	0	0	0	0.84832	0	0	-0.253327	0	0	0	0	-0.275907	0	0	0	0	0	0.990922	-0.253327	0	0		1.62912	0.448929	0	0	0	0	0	0		0			0	-0.275907	0	0	0	0	1.28005	0	-0.253327	0	0	0
>contig16831|size124|read50|cov13.82_345064	H-probe	0	0	0	0	0	0	0	0	0	0	0	0	0	0	0	0	0	0	0	0	0	0	0		0	0	0	0	0	0	0	0		0			0	0	0	0	0	0	0	0	0	0	0	0
>contig16909|size64|read13|cov7.27_25116	H-probe	0	0.499281	0	0	-1.42768	0	0	0	-1.16778	-0.391157	0	0	0	-0.284931	0	0	-1.42768	0	0	0	-1.16778	-0.391157	0		2.04958	0.920101	0	0	-1.42768	1.33492	0	0		-0.391157			0	-0.284931	0	0	-1.42768	0.822693	0	0.395779	-1.16778	-0.391157	0	0
>contig16975|size66|read22|cov11.91_05156	H-probe	0	0	0.0332866	-0.400107	1.28175	0	-0.58483	0	0	0	0	0	0	0	-0.579908	-0.400107	0	0	-0.58483	0	0	0	0		1.03325	0	-0.579908	-0.400107	0	0	-0.58483	1.16743		0			0	0	-0.579908	-0.400107	0.734246	0	-0.58483	0.395779	0	0	0	0
>contig17146|size177|read67|cov13.50_1095271	H-probe	0	0	0	0	0	0	0	0	0	0	0	0	0	0	0	0	0	0	0	0	0	0	0		0	0	0	0	0	0	0	0		0			0	0	0	0	0	0	0	0	0	0	0	0
>contig17257|size89|read18|cov6.72_135338	H-probe	0	0	0	0	0	0	0	0	0	0	0	0	0	0	0	0	0	0	0	0	0	0	0		0	0	0	0	0	0	0	0		0			0	0	0	0	0	0	0	0	0	0	0	0
>contig17285|size73|read20|cov8.75_75354	H-probe	0	0	0	0	0	0	0	0	0	0	0	0	0	0	0	0	0	0	0	0	0	0	0		0	0	0	0	0	0	0	0		0			0	0	0	0	0	0	0	0	0	0	0	0
>contig17404|size105|read22|cov7.06_405432	H-probe	0	0	0	0	0	0	0	0	0	0	0	0	0	0	0	0	0	0	0	0	0	0	0		0	0	0	0	0	0	0	0		0			0	0	0	0	0	0	0	0	0	0	0	0
>contig17434|size170|read45|cov9.46_385452	H-probe	0	0	0	0	0	0	0	0	0	0	0	0	0	0	0	0	0	0	0	0	0	0	0		0	0	0	0	0	0	0	0		0			0	0	0	0	0	0	0	0	0	0	0	0
>contig17446|size99|read20|cov7.06_375464	H-probe	0	0	0	0	0	0	0	0	0	0	0	0	0	0	0	0	0	0	0	0	0	0	0		0	0	0	0	0	0	0	0		0			0	0	0	0	0	0	0	0	0	0	0	0
>contig17534|size83|read35|cov13.80_115523	H-probe	0	0	0	0	0	0	0	0	0	0	0	0	0	0	0	0	0	0	0	0	0	0	0		0	0	0	0	0	0	0	0		0			0	0	0	0	0	0	0	0	0	0	0	0
>contig17586|size60|read22|cov12.23_05561	H-probe	0	0	0	0.788596	-1.82179	-1.69339	0	0	0	-0.391157	0	-0.602865	0	0	0	0	-1.82179	-2.54171	0	0	0	0.81512	0		1.03325	0	0	0	-1.82179	-2.54171	0	0		2.05125			0	0	0	0	-1.82179	-2.54171	0	0	0	-0.391157	0	-0.602865
>contig17640|size79|read21|cov9.46_15596	H-probe	0.102703	1.10495	0.303614	1.02598	0.063809	0.494552	0.251311	1.70871	-0.0844004	-2.14096	-1.12948	-1.61275	0.712786	0.793287	0.231458	0.91028	0.632821	-1.47257	0.391548	2.30738	1.01418	0.158354	-1.12948		1.52532	1.23026	1.08213	0.838809	0.651417	0.284164	1.27484	2.04099		-1.06449			1.05181	1.03585	0.72775	0.0548302	-0.261498	-1.19835	-1.18685	1.95721	0.622775	-1.10058	-1.12948	-0.0571973
>contig1779|size89|read34|cov13.72_115697	H-probe	0	0	0	0	0	0	0	0	0	0	0	0	0	0	0	0	0	0	0	0	0	0	0		0	0	0	0	0	0	0	0		0			0	0	0	0	0	0	0	0	0	0	0	0
>contig1787|size76|read18|cov8.51_65753	H-probe	0	0	0	0	0	0	0	0	0	0	0	0	0	0	0	0	0	0	0	0	0	0	0		0	0	0	0	0	0	0	0		0			0	0	0	0	0	0	0	0	0	0	0	0
>contig1789|size84|read21|cov8.81_75764	H-probe	-3.34681	-1.8939	-2.27045	-1.90392	-5.65915	-3.57523	-1.14878	-5.45353	-0.611773	-3.65672	-1.12948	-5.44416	-3.34681	-4.25675	-3.50602	-2.77019	-5.35114	-6.75749	0.586361	-2.88373	-0.96267	-3.65672	2.48123		0.885277	-1.37646	-2.66003	-2.80539	-3.19763	-4.71354	-1.9424	-4.75482		0.732819			-3.34681	-1.96739	-3.07561	-3.57393	-5.44361	-6.40718	-3.12405	-1.47797	0.13732	-3.65672	-1.12948	-3.88861
>contig17979|size98|read36|cov13.07_125809	H-probe	0	0	0	0	0	0	0	0	0	0	0	0	0	0	0	0	0	0	0	0	0	0	0		0	0	0	0	0	0	0	0		0			0	0	0	0	0	0	0	0	0	0	0	0
>contig18072|size66|read11|cov5.67_65867	H-probe	0	0	0	0	0	0	0	0	0	0	0	0	0	0	0	0	0	0	0	0	0	0	0		0	0	0	0	0	0	0	0		0			0	0	0	0	0	0	0	0	0	0	0	0
>contig18267|size64|read13|cov6.12_45997	H-probe	-1.38185	0.374013	-2.8812	-0.470394	-4.14512	-1.41699	-0.130285	-0.750143	0.188659	-3.51584	-2.48536	-2.49623	-0.309035	-1.82994	-0.81716	-2.00764	-2.47373	-2.72281	-0.16472	-0.664778	-0.421951	-2.22083	0.931992		1.59503	0.308629	-0.842624	-0.245914	-0.750509	-2.18814	0.458882	0.972966		0.950555			0.0207457	-0.176179	-2.22933	-2.0721	-2.89103	-3.00644	-1.2758	1.33314	0.432845	-1.64513	-1.23548	-1.04444
>contig18289|size107|read36|cov11.69_66013	H-probe	0	0	0	0	0	0	0	0	0	0	0	0	0	0	0	0	0	0	0	0	0	0	0		0	0	0	0	0	0	0	0		0			0	0	0	0	0	0	0	0	0	0	0	0
>contig18293|size112|read31|cov9.76_466017	H-probe	0	0	0	0	0	0	0	0	0	0	0	0	0	0	0	0	0	0	0	0	0	0	0		0	0	0	0	0	0	0	0		0			0	0	0	0	0	0	0	0	0	0	0	0
>contig18352|size86|read15|cov5.91_136064	H-probe	0	0	0	0	0	0	0	0	0	0	0	0	0	0	0	0	0	0	0	0	0	0	0		0	0	0	0	0	0	0	0		0			0	0	0	0	0	0	0	0	0	0	0	0
>contig18491|size77|read14|cov6.19_76151	H-probe	0	0	0	0	0	0	0	0	0	0	0	0	0	0	0	0	0	0	0	0	0	0	0		0	0	0	0	0	0	0	0		0			0	0	0	0	0	0	0	0	0	0	0	0
>contig1850|size283|read105|cov12.96_2026162	H-probe	0	0	0	0	0	0	0	0	0	0	0	0	0	0	0	0	0	0	0	0	0	0	0		0	0	0	0	0	0	0	0		0			0	0	0	0	0	0	0	0	0	0	0	0
>contig18509|size87|read19|cov7.52_166161	H-probe	-1.90554	1.20082	-1.27732	-0.0905668	-4.02056	-2.07917	-0.27164	0.81248	0.244161	-1.59655	4.47789	-1.69456	-2.31238	-1.4767	-0.435171	-0.703752	-2.69396	-3.12551	-0.451526	0.990922	-0.0665633	-0.786753	0		1.84637	2.22799	1.32059	1.94184	-1.65205	-2.69577	-2.06223	2.24438		1.58752			-0.101032	0.22371	-1.90991	-0.115682	-4.38973	-3.92757	-1.81713	2.87878	0.494126	-0.580523	0	-1.69456
>contig1859|size165|read27|cov5.69_596230	H-probe	0	0	0	0	0	0	0	0	0	0	0	0	0	0	0	0	0	0	0	0	0	0	0		0	0	0	0	0	0	0	0		0			0	0	0	0	0	0	0	0	0	0	0	0
>contig18681|size107|read37|cov12.38_56290	H-probe	0	0	0	0	0	0	0	0	0	0	0	0	0	0	0	0	0	0	0	0	0	0	0		0	0	0	0	0	0	0	0		0			0	0	0	0	0	0	0	0	0	0	0	0
>contig18687|size63|read13|cov6.56_06296	H-probe	0	0	0	0	0	0	0	0	0	0	0	0	0	0	0	0	0	0	0	0	0	0	0		0	0	0	0	0	0	0	0		0			0	0	0	0	0	0	0	0	0	0	0	0
>contig1871|size309|read107|cov12.36_1916316	H-probe	0	0	0	0	0	0	0	0	0	0	0	0	0	0	0	0	0	0	0	0	0	0	0		0	0	0	0	0	0	0	0		0			0	0	0	0	0	0	0	0	0	0	0	0
>contig1871|size309|read107|cov12.36_19394	H-probe	0	0	0	0	0	0	0	0	0	0	0	0	0	0	0	0	0	0	0	0	0	0	0		0	0	0	0	0	0	0	0		0			0	0	0	0	0	0	0	0	0	0	0	0
>contig18819|size96|read31|cov11.51_06376	H-probe	0	0	0	0	0	0	0	0	0	0	0	0	0	0	0	0	0	0	0	0	0	0	0		0	0	0	0	0	0	0	0		0			0	0	0	0	0	0	0	0	0	0	0	0
>contig18867|size60|read11|cov6.57_06410	H-probe	0	0	-0.579908	0	0	0	-0.260777	0.81248	0	-0.391157	0	-0.602865	0	0.782686	-0.579908	0	0.785761	0	-0.260777	0	0.983315	-0.391157	0		0	0.724835	0.0936087	0.768538	0	1.33492	1.44157	0		0.685313			0	0	-0.579908	0	0	0	-0.260777	0	0	-0.391157	0	-0.602865
>contig18899|size99|read19|cov6.70_186431	H-probe	0	0	0	0	0	0	0	0	0	0	0	0	0	0	0	0	0	0	0	0	0	0	0		0	0	0	0	0	0	0	0		0			0	0	0	0	0	0	0	0	0	0	0	0
>contig19227|size67|read14|cov7.43_66644	H-probe	-1.33857	-1.76703	-1.54779	-1.69903	-5.4077	-3.61881	-2.01498	-1.65172	2.14637	-2.28638	0	-3.85298	-1.33857	-2.7048	-0.817201	-3.36904	-4.89487	-6.41824	-0.291977	-0.477841	0.550023	-2.28638	0		1.52532	-2.80049	-1.16319	-1.43767	-3.70791	-7.48738	-1.75079	-2.4642		1.55221			-1.33857	-1.83354	-2.29353	-3.36904	-5.45223	-6.66469	-1.50569	0.483124	0.689769	-1.246	0	-1.56642
>contig19344|size240|read91|cov13.41_666719	H-probe	0	0	0	0	0	0	0	0	0	0	0	0	0	0	0	0	0	0	0	0	0	0	0		0	0	0	0	0	0	0	0		0			0	0	0	0	0	0	0	0	0	0	0	0
>contig19485|size73|read14|cov6.64_46806	H-probe	0	0	0	0	0	0	0	0	0	0	0	0	0	0	0	0	0	0	0	0	0	0	0		0	0	0	0	0	0	0	0		0			0	0	0	0	0	0	0	0	0	0	0	0
>contig1953|size66|read16|cov8.68_16838	H-probe	0	0	0	0	0	0	0	0	0	0	0	0	0	0	0	0	0	0	0	0	0	0	0		0	0	0	0	0	0	0	0		0			0	0	0	0	0	0	0	0	0	0	0	0
>contig19538|size61|read11|cov6.46_06836	H-probe	0	0	0	0	0	0	0	0	0	0	0	0	0	0	0	0	0	0	0	0	0	0	0		0	0	0	0	0	0	0	0		0			0	0	0	0	0	0	0	0	0	0	0	0
>contig1966|size184|read71|cov13.78_346911	H-probe	0	0	0	0	0	0	0	0	0	0	0	0	0	0	0	0	0	0	0	0	0	0	0		0	0	0	0	0	0	0	0		0			0	0	0	0	0	0	0	0	0	0	0	0
>contig19735|size68|read12|cov5.69_36951	H-probe	0	0	0	0	0	0	0	0	0	0	0	0	0	0	0	0	0	0	0	0	0	0	0		0	0	0	0	0	0	0	0		0			0	0	0	0	0	0	0	0	0	0	0	0
>contig19791|size165|read32|cov6.88_936990	H-probe	0	0	0	0	0	0	0	0	0	0	0	0	0	0	0	0	0	0	0	0	0	0	0		0	0	0	0	0	0	0	0		0			0	0	0	0	0	0	0	0	0	0	0	0
>contig1985|size143|read61|cov14.76_207037	H-probe	0	0	0	0	0	0	0	0	0	0	0	0	0	0	0	0	0	0	0	0	0	0	0		0	0	0	0	0	0	0	0		0			0	0	0	0	0	0	0	0	0	0	0	0
>contig19925|size69|read16|cov7.01_97082	H-probe	0	-1.385	-1.4856	-1.23448	-3.24042	-2.96382	-0.744548	0	-0.468746	-0.780699	0	0	0	-1.385	-1.4856	-1.23448	-3.24042	-4.34278	-0.744548	0	-0.468746	-0.780699	0		1.03325	-0.660165	-1.4856	-1.23448	-3.24042	-3.00786	-0.744548	0		0.29577			0	-1.385	-1.4856	-1.23448	-3.24042	-4.34278	-0.744548	0	-0.468746	-0.780699	0	0
>contig19969|size65|read11|cov6.08_17105	H-probe	0	-0.728149	-0.521246	0	0	-1.77036	0	-0.91049	0	0	0	0	0	0.0545373	-0.521246	0	0	-1.77036	0	-0.91049	0	0	0		2.04958	1.36391	0.609628	1.63721	1.56562	-1.77036	0	0.256941		0			0	0.0230411	-0.521246	0	0	-1.77036	1.28005	-0.51471	0.753132	0	0	0
>contig20148|size81|read18|cov7.88_57213	H-probe	0	0	0	0	0	0	0	0	0	0	0	0	0	0	0	0	0	0	0	0	0	0	0		0	0	0	0	0	0	0	0		0			0	0	0	0	0	0	0	0	0	0	0	0
>contig20196|size79|read25|cov11.37_187239	H-probe	0	0	0	0	0	0	0	0	0	0	0	0	0	0	0	0	0	0	0	0	0	0	0		0	0	0	0	0	0	0	0		0			0	0	0	0	0	0	0	0	0	0	0	0
>contig20202|size86|read17|cov6.93_167240	H-probe	0	0	0	0	0	0	0	0	0	0	0	0	0	0	0	0	0	0	0	0	0	0	0		0	0	0	0	0	0	0	0		0			0	0	0	0	0	0	0	0	0	0	0	0
>contig20293|size71|read15|cov7.55_107296	H-probe	0	0	0	0	0	0	0	0	0	0	0	0	0	0	0	0	0	0	0	0	0	0	0		0	0	0	0	0	0	0	0		0			0	0	0	0	0	0	0	0	0	0	0	0
>contig20440|size88|read24|cov8.62_107394	H-probe	0	0	0	0	0	0	0	0	0	0	0	0	0	0	0	0	0	0	0	0	0	0	0		0	0	0	0	0	0	0	0		0			0	0	0	0	0	0	0	0	0	0	0	0
>contig20464|size89|read27|cov10.67_237409	H-probe	0	0	0	0	0	0	0	0	0	0	0	0	0	0	0	0	0	0	0	0	0	0	0		0	0	0	0	0	0	0	0		0			0	0	0	0	0	0	0	0	0	0	0	0
>contig2057|size128|read44|cov12.16_187476	H-probe	0	0	0	0	0	0	0	0	0	0	0	0	0	0	0	0	0	0	0	0	0	0	0		0	0	0	0	0	0	0	0		0			0	0	0	0	0	0	0	0	0	0	0	0
>contig20648|size60|read11|cov6.58_07517	H-probe	0	0	0	0	0	0	0	0	0	0	0	0	0	0	0	0	0	0	0	0	0	0	0		0	0	0	0	0	0	0	0		0			0	0	0	0	0	0	0	0	0	0	0	0
>contig2080|size225|read95|cov14.91_1447614	H-probe	0	0	0	0	0	0	0	0	0	0	0	0	0	0	0	0	0	0	0	0	0	0	0		0	0	0	0	0	0	0	0		0			0	0	0	0	0	0	0	0	0	0	0	0
>contig20827|size65|read10|cov5.38_57631	H-probe	0	0	0	0	0	0	0	0	0	0	0	0	0	0	0	0	0	0	0	0	0	0	0		0	0	0	0	0	0	0	0		0			0	0	0	0	0	0	0	0	0	0	0	0
>contig2092|size63|read15|cov8.41_37698	H-probe	0	0	0	0	0	0	0	0	0	0	0	0	0	0	0	0	0	0	0	0	0	0	0		0	0	0	0	0	0	0	0		0			0	0	0	0	0	0	0	0	0	0	0	0
>contig20921|size83|read23|cov9.93_57689	H-probe	0	0	0	0	0	0	0	0	0	0	0	0	0	0	0	0	0	0	0	0	0	0	0		0	0	0	0	0	0	0	0		0			0	0	0	0	0	0	0	0	0	0	0	0
>contig21431|size106|read20|cov6.71_08025	H-probe	0	0	0	0	0	0	0	0	0	0	0	0	0	0	0	0	0	0	0	0	0	0	0		0	0	0	0	0	0	0	0		0			0	0	0	0	0	0	0	0	0	0	0	0
>contig21486|size69|read18|cov9.04_38055	H-probe	0	0	0	0	0	0	0	0	0	0	0	0	0	0	0	0	0	0	0	0	0	0	0		0	0	0	0	0	0	0	0		0			0	0	0	0	0	0	0	0	0	0	0	0
>contig2149|size86|read18|cov7.52_148065	H-probe	0	2.19319	-1.5457	0.309208	-2.13102	-0.470767	0.674338	-0.999629	-1.88176	-1.90485	0	-0.748964	0	0.0691122	-1.5457	-0.479388	-2.13102	-2.54171	0.814575	-0.999629	-0.898449	-1.90485	0		2.63995	2.8829	-1.5457	0.7879	-0.0378853	-2.54171	0.938527	-0.999629		-0.82838			1.04316	1.63666	-0.919089	-0.479388	-0.912513	-2.54171	0.516221	0.533396	0.0219652	-0.864467	0	-0.748964
>contig2160|size60|read17|cov9.38_08128	H-probe	0	0	0	0	0	0	0	0	0	0	0	0	0	0	0	0	0	0	0	0	0	0	0		0	0	0	0	0	0	0	0		0			0	0	0	0	0	0	0	0	0	0	0	0
>contig21642|size66|read16|cov8.67_48145	H-probe	0	0	0	0	0	0	0	0	0	0	0	0	0	0	0	0	0	0	0	0	0	0	0		0	0	0	0	0	0	0	0		0			0	0	0	0	0	0	0	0	0	0	0	0
>contig21732|size62|read11|cov6.34_28200	H-probe	0	-1.23083	-2.09916	-1.75057	-3.74302	-3.92219	-2.57375	-3.06985	0.540416	-1.90836	-1.12948	-3.08516	0	-2.4074	-2.09916	-0.946826	-4.52179	-4.924	-0.259701	-1.08349	-0.656138	-1.90836	-1.12948		2.86389	-0.892522	-2.09916	-0.98203	-2.42865	-3.51602	-0.871398	-2.37114		1.0277			0	-1.58149	-2.09916	-1.75057	-3.30328	-5.17044	-2.57375	-1.52634	0.589295	-1.90836	-1.12948	-3.08516
>contig21746|size64|read13|cov6.84_18210	H-probe	0	0	0	0	0	0	0	0	0	0	0	0	0	0	0	0	0	0	0	0	0	0	0		0	0	0	0	0	0	0	0		0			0	0	0	0	0	0	0	0	0	0	0	0
>contig21781|size61|read13|cov6.85_08237	H-probe	0	0	0	0	0	0	0	0	0	0	0	0	0	0	0	0	0	0	0	0	0	0	0		0	0	0	0	0	0	0	0		0			0	0	0	0	0	0	0	0	0	0	0	0
>contig21799|size69|read18|cov7.30_08247	H-probe	-1.33857	-0.00213308	-2.23872	-2.5968	-3.76755	-3.21438	-2.28673	-0.651857	0.182059	-2.1278	0	-3.05738	-1.33857	-0.643726	-2.23872	-2.5968	-4.26354	-5.93746	0.704653	0.108509	-0.0967714	-2.1278	0		-0.305321	-0.747937	-1.10785	-1.82826	-2.95617	-3.46034	-2.28673	-0.765624		1.32898			-0.295407	-0.250037	-2.23872	-2.5968	-4.31506	-5.93746	-2.28673	0.591044	-0.414012	-2.1278	0	-3.05738
>contig2182|size78|read40|cov17.74_28260	H-probe	0	0	0	0	0	0	0	0	0	0	0	0	0	0	0	0	0	0	0	0	0	0	0		0	0	0	0	0	0	0	0		0			0	0	0	0	0	0	0	0	0	0	0	0
>contig21840|size73|read20|cov8.30_138265	H-probe	0	0.261449	0	-0.400107	0	0.84832	-0.807184	0	0	0	0	0	0	-0.522764	0	-0.400107	0.785761	0	-0.807184	0	0	0	3.61071		1.62912	0.682269	0.673517	-0.400107	1.20583	0	-0.807184	0		0			1.04316	-0.522764	0	-0.400107	0	0	-0.807184	0	0	0	0	0
>contig22004|size118|read38|cov11.15_98369	H-probe	0	0	0	0	0	0	0	0	0	0	0	0	0	0	0	0	0	0	0	0	0	0	0		0	0	0	0	0	0	0	0		0			0	0	0	0	0	0	0	0	0	0	0	0
>contig2219|size64|read12|cov6.72_48466	H-probe	0	0	0	0	0	0	0	0	0	0	0	0	0	0	0	0	0	0	0	0	0	0	0		0	0	0	0	0	0	0	0		0			0	0	0	0	0	0	0	0	0	0	0	0
>contig22228|size61|read9|cov5.02_18478	H-probe	0	-0.531826	0	0.0755939	0	0	2.14389	0	0	0	0	0	1.03444	-0.531826	0	0.0907396	0	0	1.5784	0	0	0	0		1.03325	0.673206	0	0.0555362	1.20583	0	0	0		0			0	0.219364	0	-0.713002	0	0	0	0	0	0	0	0
>contig22250|size63|read21|cov11.65_38494	H-probe	0	0	0	0	0	0	0	0	0	0	0	0	0	0	0	0	0	0	0	0	0	0	0		0	0	0	0	0	0	0	0		0			0	0	0	0	0	0	0	0	0	0	0	0
>contig2238|size65|read17|cov9.22_58581	H-probe	0	0	0	0	0	0	0	0	0	0	0	0	0	0	0	0	0	0	0	0	0	0	0		0	0	0	0	0	0	0	0		0			0	0	0	0	0	0	0	0	0	0	0	0
>contig22483|size74|read16|cov7.51_148643	H-probe	0	0	0	0	0	0	0	0	0	0	0	0	0	0	0	0	0	0	0	0	0	0	0		0	0	0	0	0	0	0	0		0			0	0	0	0	0	0	0	0	0	0	0	0
>contig22663|size64|read11|cov5.81_38754	H-probe	0	0	0	-0.479388	0	0	0	0	0	0	0	-0.748964	0	0	0	-0.479388	0	0	0	0	0	0	0		1.03325	0	0	0.7879	0	1.33492	0	0		0			0	0	0	-0.479388	0	0	0	0	0	0	0	-0.748964
>contig2267|size79|read24|cov10.38_98766	H-probe	0	0	0	0	0	0	0	0	0	0	0	0	0	0	0	0	0	0	0	0	0	0	0		0	0	0	0	0	0	0	0		0			0	0	0	0	0	0	0	0	0	0	0	0
>contig2271|size68|read22|cov11.46_28791	H-probe	0	0	0	0	0	0	0	0	0	0	0	0	0	0	0	0	0	0	0	0	0	0	0		0	0	0	0	0	0	0	0		0			0	0	0	0	0	0	0	0	0	0	0	0
>contig22802|size83|read19|cov8.20_238833	H-probe	1.44127	-0.531826	-0.521246	0	-0.883673	-1.77036	0	0	0	-0.391157	0	0	0	-0.531826	-0.521246	0	-0.883673	-1.77036	0	0.990922	0	-0.391157	0		0	0.19301	0.609628	0	-0.158283	-1.77036	0	0		-0.391157			0	0.219364	0.105365	0	-0.149427	-0.947668	0	0	0	-0.391157	0	0
>contig22852|size96|read20|cov7.36_228860	H-probe	0	0	0	0	0	0	0	0	0	0	0	0	0	0	0	0	0	0	0	0	0	0	0		0	0	0	0	0	0	0	0		0			0	0	0	0	0	0	0	0	0	0	0	0
>contig22911|size137|read42|cov10.91_248904	H-probe	0	0	0	0	0	0	0	0	0	0	0	0	0	0	0	0	0	0	0	0	0	0	0		0	0	0	0	0	0	0	0		0			0	0	0	0	0	0	0	0	0	0	0	0
>contig23008|size69|read15|cov6.78_88960	H-probe	0	0	0	0	0	0	0	0	0	0	0	0	0	0	0	0	0	0	0	0	0	0	0		0	0	0	0	0	0	0	0		0			0	0	0	0	0	0	0	0	0	0	0	0
>contig23221|size63|read22|cov12.03_39092	H-probe	0	0	0	0	0	0	0	0	0	0	0	0	0	0	0	0	0	0	0	0	0	0	0		0	0	0	0	0	0	0	0		0			0	0	0	0	0	0	0	0	0	0	0	0
>contig23461|size97|read33|cov12.06_269242	H-probe	0	0	0	0	0	0	0	0	0	0	0	0	0	0	0	0	0	0	0	0	0	0	0		0	0	0	0	0	0	0	0		0			0	0	0	0	0	0	0	0	0	0	0	0
>contig23464|size123|read22|cov6.24_519244	H-probe	0	0	0	0	0	0	0	0	0	0	0	0	0	0	0	0	0	0	0	0	0	0	0		0	0	0	0	0	0	0	0		0			0	0	0	0	0	0	0	0	0	0	0	0
>contig23552|size112|read35|cov10.87_109296	H-probe	0	0	0	0	0	0	0	0	0	0	0	0	0	0	0	0	0	0	0	0	0	0	0		0	0	0	0	0	0	0	0		0			0	0	0	0	0	0	0	0	0	0	0	0
>contig23553|size65|read21|cov11.51_59298	H-probe	0	0	0	0	0	0	0	0	0	0	0	0	0	0	0	0	0	0	0	0	0	0	0		0	0	0	0	0	0	0	0		0			0	0	0	0	0	0	0	0	0	0	0	0
>contig2357|size66|read39|cov17.03_09311	H-probe	-2.28469	-1.83629	-2.64447	-1.58899	-6.60906	-4.35038	-1.43756	-4.98672	-0.747116	-4.21995	-1.12948	-5.4776	-3.72596	-4.1248	-3.81	-4.01239	-4.96991	-8.56829	-0.0253021	-2.00264	-0.851359	-4.21995	-1.12948		-0.497451	-2.04085	-3.12249	-2.37518	-3.95484	-5.02501	-1.94654	-4.98672		-0.0797377			-3.72596	-2.29361	-3.48338	-4.01239	-5.8074	-8.56829	-3.12819	-0.653985	-0.595808	-3.17956	-1.12948	-5.4776
>contig2360|size83|read27|cov11.64_149326	H-probe	0	0	0	0	0	0	0	0	0	0	0	0	0	0	0	0	0	0	0	0	0	0	0		0	0	0	0	0	0	0	0		0			0	0	0	0	0	0	0	0	0	0	0	0
>contig2361|size118|read37|cov10.94_449331	H-probe	0	0	0	0	0	0	0	0	0	0	0	0	0	0	0	0	0	0	0	0	0	0	0		0	0	0	0	0	0	0	0		0			0	0	0	0	0	0	0	0	0	0	0	0
>contig23676|size84|read14|cov5.82_159374	H-probe	0	0	0	0	0	0	0	0	0	0	0	0	0	0	0	0	0	0	0	0	0	0	0		1.03325	0.724835	0	0.768538	0	1.33492	0	0		0			0	0	0	0	0	0	0	0.724583	0	0	0	0
>contig23691|size82|read18|cov7.85_99383	H-probe	0	0	0	0	0	0	0	0	0	0	0	0	0	0	0	0	0	0	0	0	0	0	0		0	0	0	0	0	0	0	0		0			0	0	0	0	0	0	0	0	0	0	0	0
>contig2374|size95|read25|cov8.94_19423	H-probe	-1.33857	0.628365	-1.71904	0.0991828	-2.17738	-0.37592	1.97087	-0.999629	-2.58174	-1.33804	0	-0.0894339	-0.304129	-2.13233	-1.70062	-0.76709	-0.994159	-2.34304	-0.999801	-0.999629	-0.606838	-0.13176	0		1.88994	0.899743	-0.341364	-1.57083	0.187918	-3.41218	0.702551	-0.999629		-0.261568			1.05181	0.21791	-2.33224	0.0786095	-1.37573	-2.06883	0.280245	-0.0384053	-1.82861	-1.33804	0	-1.77197
>contig23917|size76|read12|cov5.43_19518	H-probe	0	0.479698	-0.521246	0	0	-1.77036	-0.58483	0	0	0	0	0	0	-0.304515	-0.521246	0	0	-1.77036	-0.58483	0.990922	0	1.20628	0		0	1.26017	0.152271	0	1.20583	-1.77036	1.11752	0		0			1.04316	-0.304515	-0.521246	0	0	-1.77036	-0.58483	0	0	0	0	0
>contig2395|size77|read23|cov10.21_09543	H-probe	0	-0.432513	-0.521246	-0.838591	-2.95616	-3.10293	-1.5847	-1.46434	-0.468746	-0.698565	0	-1.43374	0	-2.09538	-0.521246	-0.838591	-2.17039	-2.88211	-1.5847	-1.46434	-0.468746	-0.698565	3.61071		0	-0.89035	-0.521246	-0.0700534	-1.75033	-1.93503	-1.5847	-1.46434		2.2375			0	-0.852712	-0.521246	-0.838591	-2.95616	-3.12856	-0.304651	-0.487551	-0.468746	-0.698565	0	-1.43374
>contig2398|size151|read72|cov16.68_819557	H-probe	0	0	0	0	0	0	0	0	0	0	0	0	0	0	0	0	0	0	0	0	0	0	0		0	0	0	0	0	0	0	0		0			0	0	0	0	0	0	0	0	0	0	0	0
>contig24194|size79|read16|cov6.15_129679	H-probe	0	0	0	0	0	0	0	0	0	0	0	0	0	0	0	0	0	0	0	0	0	0	0		0	0	0	0	0	0	0	0		0			0	0	0	0	0	0	0	0	0	0	0	0
>contig24551|size70|read12|cov6.14_79907	H-probe	0	-0.906787	0.613195	0	0.778772	0.84832	1.11631	0.81248	-0.253327	0	0	-0.422548	0	-0.906787	0.631622	0	0	0	-0.321848	0	-0.253327	0	0		0	-0.181951	1.75695	2.17559	0.72539	2.01622	-0.321848	1.16743		1.07647			0	-0.906787	0	0	0	0	-0.321848	0	0.499805	0	0	-0.422548
>contig24607|size67|read19|cov9.84_09943	H-probe	-1.33857	-1.35447	-2.26866	-1.16231	-5.00182	-3.38991	-2.2788	-3.88697	-0.78674	-3.37443	-1.12948	-4.47746	-0.304129	-3.22807	-3.0094	-2.4523	-4.61818	-5.4419	0.797174	-1.9006	-1.06557	-3.37443	2.48123		1.03619	-0.574263	-2.51015	-2.50188	-2.76585	-4.00112	-3.71696	-2.36633		1.08949			-1.33857	-1.31399	-3.64102	-3.76917	-5.06507	-6.20105	-2.43692	-0.826141	-0.274161	-0.988424	-1.12948	-2.92191
>contig24789|size72|read22|cov9.47_1210052	H-probe	0	0	0	0	0	0	0	0	0	0	0	0	0	0	0	3.60696	0	0	0	0	0	0	0		0	0	0	0	0	0	0	0		0			0	0	0	0	0	0	0	0	0	0	0	0
>contig24831|size95|read22|cov7.65_3310075	H-probe	0	0	0	0	0	0	0	0	0	0	0	0	0	0	0	0	0	0	0	0	0	0	0		0	0	0	0	0	1.33492	0	0		0			0	0	0	0	0	0	0	0	0	1.04038	0	0
>contig24886|size107|read51|cov16.97_1310109	H-probe	0	0	0	0	0	0	0	0	0	0	0	0	0	0	0	0	0	0	0	0	0	0	0		0	0	0	0	0	0	0	0		0			0	0	0	0	0	0	0	0	0	0	0	0
>contig25086|size64|read10|cov5.62_110213	H-probe	0	0	0	0	0	0	0	0	0	0	0	0	0	0	0	0	0	0	0	0	0	0	0		0	0	0	0	0	0	0	0		0			0	0	0	0	0	0	0	0	0	0	0	0
>contig25219|size62|read15|cov8.16_210285	H-probe	0	0	0	0	0	0	0	0	0	0	0	0	0	0	0	0	0	0	0	0	0	0	0		0	0	0	0	0	0	0	0		1.07647			0	0	0	0	0	0	0	0	0	0	0	0
>contig25354|size94|read39|cov14.55_1110371	H-probe	0	0	0	0	0	0	0	0	0	0	0	0	0	0	0	0	0	0	0	0	0	0	0		0	0	0	0	0	0	0	0		0			0	0	0	0	0	0	0	0	0	0	0	0
>contig2563|size137|read74|cov19.02_2710525	H-probe	0	0.562542	-0.903337	0	-1.42768	-2.54171	-0.321848	0	-1.52104	0	0	-0.894544	1.6307	-0.726881	-0.271715	0	-1.42768	-2.54171	-0.321848	0	-1.52104	0	0		1.62912	1.36518	0.574272	0.768538	-1.42768	-2.54171	-0.321848	1.16743		2.11324			1.04316	-0.726881	0.158693	0	-1.42768	-1.71902	-0.321848	0	-0.767907	0	0	-0.894544
>contig25768|size95|read29|cov10.93_2710591	H-probe	0	0	0	0	0	0	0	0	0	0	0	0	0	0	0	0	0	0	0	0	0	0	0		0	0	0	0	0	0	0	0		0			0	0	0	0	0	0	0	0	0	0	0	0
>contig25800|size267|read70|cov9.15_5110605	H-probe	0	0.784212	0	0.788596	-0.883673	0	0	0	0	0	0	0	0	0.782686	0	0	-0.0979114	0	0	0	0	0	0		0	0.724835	0	0	-0.883673	0	0	0		0			0	0	0	0	-0.883673	0	0	0	0	0	0	0
>contig25872|size77|read15|cov5.95_010645	H-probe	-2.48207	2.43892	-1.62553	-0.792601	-1.04302	0.766293	0.752467	-0.187148	-2.2741	-1.62239	0	-1.43374	-0.851374	1.47405	-1.16929	-1.5812	-0.156396	-1.77036	1.76975	-0.00870661	0.0210347	-0.416109	0		0.575613	2.80641	0.676706	0.594396	-0.615964	-1.77036	1.07027	-0.999629		-0.545916			0.398497	1.41232	-1.17669	-1.5812	-1.08755	-0.947668	-0.111373	0.835269	-0.370375	0.0161728	0	-1.43374
>contig25992|size83|read24|cov9.93_2110709	H-probe	0	0	0	0	0	0	0	0	0	0	0	0	0	0	0	0	0	0	0	0	0	0	0		0	0	0	0	0	0	0	0		0			0	0	0	0	0	0	0	0	0	0	0	0
>contig26054|size69|read15|cov7.62_710742	H-probe	0	0	0	0	0	0	0	0	0	0	0	0	0	0	0	0	0	0	0	0	0	0	0		0	0	0	0	0	0	0	0		0			0	0	0	0	0	0	0	0	0	0	0	0
>contig26366|size63|read16|cov8.33_110911	H-probe	0	0	0	0	0	0	0	0	0	0	0	0	0	0	0	0	0	0	0	0	0	0	0		0	0	0	0	0	0	0	0		0			0	0	0	0	0	0	0	0	0	0	0	0
>contig26405|size88|read15|cov5.81_310931	H-probe	0	0	0	0	0	0	0	0	0	0	0	0	0	0	0	0	0	0	0	0	0	0	0		0	0	0	0	0	0	0	0		0			0	0	0	0	0	0	0	0	0	0	0	0
>contig26446|size104|read28|cov9.62_4210955	H-probe	0	0	0	0	0	0	0	0	0	0	0	0	0	0	0	0	0	0	0	0	0	0	0		0	0	0	0	0	0	0	0		0			0	0	0	0	0	0	0	0	0	0	0	0
>contig2657|size61|read13|cov7.66_111027	H-probe	0	0	0	0	0	0	0	0	0	0	0	0	0	0	0	0	0	0	0	0	0	0	0		0	0	0	0	0	0	0	0		0			0	0	0	0	0	0	0	0	0	0	0	0
>contig26629|size61|read21|cov11.36_011049	H-probe	0	0	0	0	0	0	0	0	0	0	0	0	0	0	0	0	0	0	0	0	0	0	0		0	0	0	0	0	0	0	0		0			0	0	0	0	0	0	0	0	0	0	0	0
>contig26671|size84|read22|cov9.32_1711075	H-probe	0	0	0	0	0	0	0	0	0	0	0	0	0	0	0	0	0	0	0	0	0	0	0		0	0	0	0	0	0	0	0		0			0	0	0	0	0	0	0	0	0	0	0	0
>contig26702|size87|read17|cov6.94_911097	H-probe	0	0	0	0	0	0	0	0	0	0	0	0	0	0	0	0	0	0	0	0	0	0	0		0	0	0	0	0	0	0	0		0			0	0	0	0	0	0	0	0	0	0	0	0
>contig26790|size78|read14|cov6.33_1211145	H-probe	2.61983	-0.912621	0	-0.838591	0	0	0	0	0	-0.391157	-1.12948	0	0	-0.912621	0.631622	-0.838591	0	0	0	0	0	0.81512	-1.12948		2.04958	1.17944	1.47761	-0.0700534	1.85335	1.33492	2.46169	0.698714		0.685313			0	-0.161431	0	0.439243	0.734246	0	1.94745	0.395779	0	1.2474	-1.12948	0
>contig26883|size62|read17|cov9.40_011209	H-probe	0	0	0	0	0	0	0	0	0	0	0	0	0	0	0	0	0	0	0	0	0	0	0		0	0	0	0	0	0	0	0		0			0	0	0	0	0	0	0	0	0	0	0	0
>contig26895|size92|read26|cov9.15_111213	H-probe	0	0	0	0	0	0	0	0	0	0	0	0	0	0	0	0	0	0	0	0	0	0	0		0	0	0	0	0	0	0	0		0			0	0	0	0	0	0	0	0	0	0	0	0
>contig27036|size73|read14|cov6.70_311299	H-probe	0	0	0	0	0	0	0	0	0	0	0	0	0	0	0	0	0	0	0	0	0	0	0		0	0	0	0	0	0	0	0		0			0	0	0	0	0	0	0	0	0	0	0	0
>contig27040|size78|read20|cov8.95_411303	H-probe	0	0	0	0	0	0	0	0	0	0	0	0	0	0	0	0	0	0	0	0	0	0	0		0	0	0	0	0	0	0	0		0			0	0	0	0	0	0	0	0	0	0	0	0
>contig2711|size70|read11|cov5.56_011346	H-probe	0	0	0	0	0	0	0	0	0	0	0	0	0	0	0	0	0	0	0	0	0	0	0		0	0	0	0	0	0	0	0		0			0	0	0	0	0	0	0	0	0	0	0	0
>contig2727|size63|read20|cov11.00_111439	H-probe	0	0	0	0	0	0	0	0	0	0	0	0	0	0	0	0	0	0	0	0	0	0	0		0	0	0	0	0	0	0	0		0			0	0	0	0	0	0	0	0	0	0	0	0
>contig2731|size421|read187|cov15.65_179173	H-probe	0	0	0	0	0	0	0	0	0	0	0	0	0	0	0	0	0	0	0	0	0	0	0		0	0	0	0	0	0	0	0		0			0	0	0	0	0	0	0	0	0	0	0	0
>contig2731|size421|read187|cov15.65_18611460	H-probe	0	0	0	0	0	0	0	0	0	0	0	0	0	0	0	0	0	0	0	0	0	0	0		0	0	0	0	0	0	0	0		0			0	0	0	0	0	0	0	0	0	0	0	0
>contig2731|size421|read187|cov15.65_186171	H-probe	0	0	0	0	0	0	0	0	0	0	0	0	0	0	0	0	0	0	0	0	0	0	0		0	0	0	0	0	0	0	0		0			0	0	0	0	0	0	0	0	0	0	0	0
>contig2731|size421|read187|cov15.65_354172	H-probe	0	0	0	0	0	0	0	0	0	0	0	0	0	0	0	0	0	0	0	0	0	0	0		0	0	0	0	0	0	0	0		0			0	0	0	0	0	0	0	0	0	0	0	0
>contig27329|size60|read10|cov6.00_011466	H-probe	0	0	0	0	0	0	0	0	0	0	0	0	0	0	0	0	0	0	0	0	0	0	0		0	0	0	0	0	0	0	0		0			0	0	0	0	0	0	0	0	0	0	0	0
>contig27341|size60|read10|cov5.35_011472	H-probe	-2.02077	0.751289	0.0919493	-1.02387	-0.145926	-0.922042	0.693614	0	0.943227	-0.84003	3.54123	-1.2395	-2.02077	-1.20796	0.110377	-1.02387	-0.641916	-1.77036	1.5695	0.990922	1.30935	-0.84003	3.61071		1.94757	1.57327	1.84744	-0.25533	-0.22185	-1.77036	-0.744548	0		0.23644			-2.02077	-1.20796	0.540785	-1.02387	-1.42768	-0.947668	-0.744548	0.395779	0.499805	1.22013	0	-1.2395
>contig27419|size78|read19|cov8.72_1811513	H-probe	0	0	0	0	0	0	0	0	0	0	0	0	0	0	0	0	0	0	0	0	0	0	0		0	0	0	0	0	0	0	0		0			0	0	0	0	0	0	0	0	0	0	0	0
>contig2743|size388|read137|cov12.49_311529	H-probe	0	0	0	0	0	0	0	0	0	0	0	0	0	0	0	0	0	0	0	0	0	0	0		0	0	0	0	0	0	0	0		0			0	0	0	0	0	0	0	0	0	0	0	0
>contig27439|size94|read22|cov7.16_011528	H-probe	0	0	0	0	0	0	0	0	0	0	0	0	0	0	0	0	0	0	0	0	0	0	0		0	0	0	0	0	0	0	0		0			0	0	0	0	0	0	0	0	0	0	0	0
>contig27484|size84|read15|cov6.13_1511554	H-probe	0	0	0	0	0	0	0	0	0	0	0	0	0	0	0	0	0	0	0	0	0	0	0		0	0	0	0	0	0	0	0		0			0	0	0	0	0	0	0	0	0	0	0	0
>contig2758|size62|read13|cov7.31_211612	H-probe	0	0	0	0	0	0	0	0	0	0	0	0	0	0	0	0	0	0	0	0	0	0	0		0	0	0	0	0	0	0	0		0			0	0	0	0	0	0	0	0	0	0	0	0
>contig27790|size70|read16|cov5.77_1011735	H-probe	0	0.784212	0	-0.400107	-1.42768	0	-0.58483	0	0	0	0	0	0	0	0	-0.400107	-1.42768	0	-0.58483	0	0	0	0		0	0	0	-0.400107	-1.42768	0	-0.58483	0		0			0	0	0	-0.400107	-1.42768	0	-0.58483	0	0	0	0	0
>contig28081|size61|read12|cov6.93_111898	H-probe	0	0	0	0	0	0	0	0	0	0	0	0	0	0	0	0	0	0	0	0	0	0	0		0	0	0	0	0	0	0	0		0			0	0	0	0	0	0	0	0	0	0	0	0
>contig28180|size60|read40|cov21.82_011950	H-probe	0	0	0	0	0	0	0	0	0	0	0	0	0	0	0	0	0	0	0	0	0	0	0		0	0	0	0	0	0	0	0		0			0	0	0	0	0	0	0	0	0	0	0	0
>contig28191|size63|read14|cov6.57_211954	H-probe	0	0	0	0	0	0	0	0	0	0	0	0	0	0	0	0	0	0	0	0	0	0	0		1.62912	0	0.673517	0	0	0	0	0		0			0	0	0	0	0	0	0	0	0	0	0	0
>contig28363|size70|read17|cov8.21_312039	H-probe	0	0	0	0	0	0	0	0	0	0	0	0	0	0	0	0	0	0	0	0	0	0	0		0	0	0	0	0	0	0	0		0			0	0	0	0	0	0	0	0	0	0	0	0
>contig28397|size91|read22|cov8.18_212064	H-probe	0	-0.284931	0	0	0	0	0	0	0	-0.736268	0	0	0	-0.284931	0	0	0	0	0	0	0	-0.736268	0		0	-0.284931	0	0	0	0	0	0		-0.736268			0	-0.284931	0	0	0	0	0	0	0	-0.736268	0	0
>contig28486|size69|read16|cov7.84_412110	H-probe	0	0	0	0	0	0	0	0	0	0	0	0	0	0	0	0	0	0	0	0	0	0	0		0	0	0	0	0	0	0	0		0			0	0	0	0	0	0	0	0	0	0	0	0
>contig286|size60|read23|cov13.27_012238	H-probe	0	-1.21815	-0.579908	-1.27948	-4.01892	-3.63665	0.438361	-0.91049	0.540416	-0.968853	0	-2.34583	0	-2.00236	-0.579908	-1.27948	-4.01892	-5.01561	-0.999801	0.0804323	-0.656138	-0.968853	0		1.03325	-1.27752	0.0936087	-0.510942	-1.92579	-3.68069	-0.999801	-0.91049		0.107616			0	-0.759688	-0.579908	-0.503483	-4.01892	-5.01561	-0.999801	0.490931	-0.656138	-0.968853	0	-2.34583
>contig28623|size85|read21|cov8.49_312191	H-probe	0	0	0	0	0	0	0	0	0	0	0	0	0	0	0	0	0	0	0	0	0	0	0		0	0	0	0	0	0	0	0		0			0	0	0	0	0	0	0	0	0	0	0	0
>contig28647|size71|read17|cov8.49_012203	H-probe	0	0	0	0	0	0	0	0	0	0	0	0	0	0	0	0	0	0	0	0	0	0	0		0	0	0	0	0	0	0	0		0			0	0	0	0	0	0	0	0	0	0	0	0
>contig28759|size63|read11|cov6.29_312264	H-probe	0	0	0	0	0	0	0	0	0	0	0	0	0	0	0	0	0	0	0	0	0	0	0		0	0	0	0	0	0	0	0		0			0	0	0	0	0	0	0	0	0	0	0	0
>contig28787|size80|read16|cov7.15_412279	H-probe	0	-0.275907	-0.521246	0	-1.42768	0	1.43816	0	0	0	0	-1.2496	0	-0.275907	-0.521246	0	-1.42768	0	0.99508	0	0	0	0		2.04958	0.448929	-0.521246	0	-0.22185	0	0	0		0			0	-0.275907	-0.521246	0	-1.42768	0	0	0	0	0	0	-1.2496
>contig28821|size67|read32|cov16.03_312300	H-probe	0	0	0	0	0	0	0	0	0	0	0	0	0	0	0	0	0	0	0	0	0	0	0		0	0	0	0	0	0	0	0		0			0	0	0	0	0	0	0	0	0	0	0	0
>contig28964|size82|read18|cov7.50_212385	H-probe	0	0	0	0	0	0	0	0	0	0	0	0	0	0	0	0	0	0	0	0	0	0	0		0	0	0	0	0	0	0	0		0			0	0	0	0	0	0	0	0	0	0	0	0
>contig28980|size200|read56|cov9.88_9112394	H-probe	0	0	0	0	0	0	0	0	0	0	0	0	0	0	0	0	0	0	0	0	0	0	0		0	0	0	0	0	0	0	0		0			0	0	0	0	0	0	0	0	0	0	0	0
>contig2914|size330|read157|cov16.82_85188	H-probe	0	0	0	0	0	0	0	0	0	0	0	0	0	0	0	0	0	0	0	0	0	0	0		0	0	0	0	0	0	0	0		0			0	0	0	0	0	0	0	0	0	0	0	0
>contig2925|size111|read46|cov14.69_4012538	H-probe	0	0	0	0	0	0	0	0	0	0	0	0	0	0	0	0	0	0	0	0	0	0	0		0	0	0	0	0	0	0	0		0			0	0	0	0	0	0	0	0	0	0	0	0
>contig29366|size89|read28|cov10.81_1012597	H-probe	0	0	0	0	0	0	0	0	0	0	0	0	0	0	0	0	0	0	0	0	0	0	0		0	0	0	0	0	0	0	0		0			0	0	0	0	0	0	0	0	0	0	0	0
>contig29749|size68|read18|cov9.40_512808	H-probe	0	0	0	0	0	0	0	0	0	0	0	0	0	0	0	0	0	0	0	0	0	0	0		0	0	0	0	0	0	0	0		0			0	0	0	0	0	0	0	0	0	0	0	0
>contig29867|size78|read15|cov6.67_1312864	H-probe	0	0	0	0	0	0	0	0	0	0	0	0	0	0	0	0	0	0	0	0	0	0	0		0	0	0	0	0	0	0	0		0			0	0	0	0	0	0	0	0	0	0	0	0
>contig29914|size86|read18|cov7.35_2112889	H-probe	0	0	0	0	0	0	0	0	0	0	0	0	0	0	0	0	0	0	0	0	0	0	0		0	0	0	0	0	0	0	0		0			0	0	0	0	0	0	0	0	0	0	0	0
>contig2998|size157|read40|cov9.00_5512937	H-probe	0	0	0	0	0	0	0	0	0	0	0	0	0	0	0	0	0	0	0	0	0	0	0		0	0	0	0	0	0	0	0		0			0	0	0	0	0	0	0	0	0	0	0	0
>contig30104|size71|read13|cov6.31_512994	H-probe	0	0	0	0	0	0	0	0	0	0	0	0	0	0	0	0	0	0	0	0	0	0	0		0	0	0	0	0	0	0	0		0			0	0	0	0	0	0	0	0	0	0	0	0
>contig30257|size89|read18|cov7.10_1013071	H-probe	0	0	0.613195	0	0	0	0	0	0	0	0	0	0	0	0	0	0	0	0	0	0	0	0		0	0	0	0	0	0	0	0		0			0	0	0	0	0	0	0	0	0	0	0	0
>contig30500|size66|read12|cov6.39_613191	H-probe	0	0	0	0.788596	0	0	0	0	0	-0.780699	0	0	0	0	0.631622	5.92243	0	0	0	0	0	-0.780699	0		0	0	0	0	0	0	0	0		0.29577			0	0	0	0	0	0	0	0	0	-0.780699	0.895964	0
>contig30541|size104|read35|cov11.79_3313210	H-probe	0	-0.275907	0	-0.777163	0	1.76605	-0.260777	0.81248	-0.698952	-0.632981	0	-0.602865	1.03444	-0.275907	0.631622	-0.777163	1.6654	0	-0.260777	0	0.284363	0.573296	0		1.03325	0.929126	1.47761	0.490124	1.56562	2.01622	-0.260777	0		-0.632981			1.04316	-0.275907	0	-0.777163	1.21851	0.822693	-0.260777	0	-0.698952	-0.632981	0	-0.602865
>contig30542|size91|read19|cov7.40_1613211	H-probe	-1.33857	-0.555822	-0.948562	0.0114329	0	0	0	0	-0.361446	-0.391157	0	-0.894544	0.292132	0.226864	-0.948562	0.0265786	0.785761	0	0	0	-0.361446	-0.391157	0		-0.305321	-0.555822	0.529048	0.860043	1.56562	0	1.70235	0		-0.391157			-1.33857	-0.555822	-0.948562	-0.777163	0	0	0	0.395779	-0.361446	-0.391157	0	-0.894544
>contig30911|size73|read13|cov6.08_013394	H-probe	0	0	0	0	0	0	0	0	0	0	0	0	0	0	0	0	0	0	0	0	0	0	0		0	0	0	0	0	0	0	0		0			0	0	0	0	0	0	0	0	0	0	0	0
>contig3103|size198|read89|cov15.69_11713457	H-probe	0	0	0	0	0	0	0	0	0	0	0	0	0	0	0	0	0	0	0	0	0	0	0		0	0	0	0	0	0	0	0		0			0	0	0	0	0	0	0	0	0	0	0	0
>contig31470|size88|read20|cov8.11_1213698	H-probe	0	0	0	0	0	0	0	0	0	0	0	0	0	0	0	0	0	0	0	0	0	0	0		0	0	0	0	0	0	0	0		0			0	0	0	0	0	0	0	0	0	0	0	0
>contig31703|size72|read16|cov7.51_513824	H-probe	0	0	0	0	0	0	0	0	0	0	0	0	0	0	0	0	0	0	0	0	0	0	0		0	0	0	0	0	0	0	0		0			0	0	0	0	0	0	0	0	0	0	0	0
>contig31744|size60|read10|cov5.95_013849	H-probe	0	0	0	0	0	0	0	0	0	0	0	0	0	0	0	0	0	0	0	0	0	0	0		0	0	0	0	0	0	0	0		0			0	0	0	0	0	0	0	0	0	0	0	0
>contig31764|size96|read16|cov5.62_2213863	H-probe	0	0	0	0	0	0	0	0	0	0	0	0	0	0	0	0	0	0	0	0	0	0	0		0	0	0	0	0	0	0	0		0			0	0	0	0	0	0	0	0	0	0	0	0
>contig31850|size67|read14|cov7.28_413911	H-probe	0	0	0	0	0	0	0	0	0	0	0	0	0	0	0	0	0	0	0	0	0	0	0		0	0	0	0	0	0	0	0		0			0	0	0	0	0	0	0	0	0	0	0	0
>contig32030|size69|read11|cov5.68_013997	H-probe	0	0	0	0	0	0	0	0	0	0	0	0	0	0	0	0	0	0	0	0	0	0	0		0	0	0	0	0	0	0	0		0			0	0	0	0	0	0	0	0	0	0	0	0
>contig32400|size143|read55|cov13.77_3114199	H-probe	0	0	0	0	0	0	0	0	0	0	0	0	0	0	0	0	0	0	0	0	0	0	0		0	0	0	0	0	0	0	0		0			0	0	0	0	0	0	0	0	0	0	0	0
>contig32498|size72|read21|cov9.92_1214253	H-probe	0	0	0	0	0	0.84832	0	0	-1.16778	-0.698565	0	0	0	0	0.631622	0	0	0	0.99508	0	-1.16778	-0.698565	0		1.03325	0.724835	0.673517	1.26729	0.72539	0	0	0		-0.698565			2.06426	0	0	0	0.734246	0	0	0	-1.16778	-0.698565	0	1.55555
>contig32591|size63|read12|cov6.73_214298	H-probe	0	0	0	0	0	0	0	0	0	0	0	0	0	0	0	0	0	0	0	0	0	0	0		0	0	0	0	0	0	0	0		0			0	0	0	0	0	0	0	0	0	0	0	0
>contig327|size116|read42|cov12.51_1214401	H-probe	0	-0.539388	0	1.2956	-1.82179	0	-0.321848	-0.999629	0	-0.632981	0	-0.602865	0	-0.539388	0	0.803741	-1.82179	0	-0.321848	-0.999629	0	-0.632981	0		0	0.185448	0.673517	1.93137	-0.256174	1.33492	-0.321848	0.804519		0.443489			0	0.703283	0	0	-1.82179	0.822693	0.958197	0.0077892	0	0.407402	0.895964	-0.602865
>contig32771|size81|read26|cov11.49_1214387	H-probe	0	0	0	0	0	0	0	0	0	0	0	0	0	0	0	0	0	0	0	0	0	0	0		0	0	0	0	0	0	0	0		0			0	0	0	0	0	0	0	0	0	0	0	0
>contig33056|size79|read14|cov6.33_1914514	H-probe	0	0	0	0	0	0	0	0	0	0	0	0	0	0	0	0	0	0	0	0	0	0	0		0	0	0	0	0	0	0	0		0			0	0	0	0	0	0	0	0	0	0	0	0
>contig33597|size64|read11|cov6.00_414804	H-probe	0	0	0	0	0	0	0	0	0	0	0	0	0	0	0	0	0	0	0	0	0	0	0		0	0	0	0	0	0	0	0		0			0	0	0	0	0	0	0	0	0	0	0	0
>contig33608|size61|read12|cov6.85_014810	H-probe	0	0	0	0	0	0	0	0	0	0	0	0	0	0	0	0	0	0	0	0	0	0	0		0	0	0	0	0	0	0	0		0			0	0	0	0	0	0	0	0	0	0	0	0
>contig33650|size71|read14|cov6.97_014832	H-probe	0	0	0	0	0	0	0	0	0	0	0	0	0	0	0	0	0	0	0	0	0	0	0		0	0	0	0	0	0	0	0		0			0	0	0	0	0	0	0	0	0	0	0	0
>contig3368|size86|read37|cov15.35_1014855	H-probe	0	0	0	0	0	0	0	0	0	0	0	0	0	0	0	0	0	0	0	0	0	0	0		0	0	0	0	0	0	0	0		0			0	0	0	0	0	0	0	0	0	0	0	0
>contig3374|size799|read378|cov16.57_35414887	H-probe	0	0	0	0	0	0	0	0	0	0	0	0	0	0	0	0	0	0	0	0	0	0	0		0	0	0	0	0	0	0	0		0			0	0	0	0	0	0	0	0	0	0	0	0
>contig3374|size799|read378|cov16.57_354245	H-probe	0	0	0	0	0	0	0	0	0	0	0	0	0	0	0	0	0	0	0	0	0	0	0		0	0	0	0	0	0	0	0		0			0	0	0	0	0	0	0	0	0	0	0	0
>contig3374|size799|read378|cov16.57_376244	H-probe	0	0	0	0	0	0	0	0	0	0	0	0	0	0	0	0	0	0	0	0	0	0	0		0	0	0	0	0	0	0	0		0			0	0	0	0	0	0	0	0	0	0	0	0
>contig3374|size799|read378|cov16.57_393243	H-probe	0	0	0	0	0	0	0	0	0	0	0	0	0	0	0	0	0	0	0	0	0	0	0		0	0	0	0	0	0	0	0		0			0	0	0	0	0	0	0	0	0	0	0	0
>contig3379|size130|read49|cov12.93_2714909	H-probe	0	0	0	0	0	0	0	0	0	0	0	0	0	0	0	0	0	0	0	0	0	0	0		0	0	0	0	0	0	0	0		0			0	0	0	0	0	0	0	0	0	0	0	0
>contig33833|size99|read28|cov9.81_3714929	H-probe	0	0	0	0	0	0	0	0	0	0	0	0	0	0	0	0	0	0	0	0	0	0	0		0	0	0	0	0	0	0	0		0			0	0	0	0	0	0	0	0	0	0	0	0
>contig33850|size63|read19|cov10.79_014940	H-probe	-2.02077	-0.212157	-0.903337	-1.12595	-1.6744	-2.85843	-0.788482	-1.58447	0	0	0	-1.13705	-2.02077	-1.50158	-0.903337	-1.12595	-2.95616	-3.70675	-0.788482	-1.58447	1.9749	0	0		-2.02077	-1.50158	-0.903337	-1.12595	-2.23077	-2.37183	-0.788482	-1.58447		1.68605			-2.02077	-1.50158	-0.903337	-1.12595	-2.95616	-3.70675	-0.788482	-1.58447	0	0	0	-1.13705
>contig33865|size262|read62|cov8.35_1014952	H-probe	0	0	0	0	0	0	0	0	0	0	0	0	0	0	0	0	0	0	0	0	0	0	0		0	0	0	0	0	0	0	0		0			0	0	0	0	0	0	0	0	0	0	0	0
>contig33949|size91|read25|cov9.10_1414993	H-probe	1.44127	0	-0.521246	0	0	0	-0.58483	0	0	-0.391157	-1.12948	-0.602865	0	0	-0.521246	0	0.785761	0	-0.58483	0	0	-0.391157	-1.12948		1.62912	0.724835	-0.521246	0.768538	0	0	-0.58483	0		-0.391157			0	1.24267	-0.521246	0	0	0.822693	-0.58483	0.395779	0	1.2474	-1.12948	-0.602865
>contig33998|size60|read12|cov7.17_015014	H-probe	0	0.479698	-0.579908	-0.713002	0	0.84832	0	0	-0.361446	-0.391157	0	-1.52602	0	-0.304515	-0.579908	-0.713002	0.785761	0	0	0	-0.361446	-0.391157	0		2.04958	2.47672	1.78878	1.21837	1.20583	0	1.70235	0.698714		0.685313			0	0.446675	0.0467027	-0.713002	0	0	0	0.961223	-0.361446	-0.391157	0	-1.52602
>contig34132|size89|read15|cov5.92_2215072	H-probe	0	-0.275907	0	0	0	0	-0.295598	0	0	-0.391157	0	0	0	-0.275907	0.631622	0	0	0	-0.295598	0	0	-0.391157	0		0	-0.275907	1.13087	0	0.72539	0	-0.295598	0		-0.391157			1.04316	-0.275907	0	0	0	0	-0.295598	0	0	-0.391157	0	0
>contig34226|size80|read17|cov7.22_815110	H-probe	0	0	0	0	0	0	0	0	0	0	0	0	0	0	0	0	0	0	0	0	0	0	0		0	0	0	0	0	0	0	0		0			0	0	0	0	0	0	0	0	0	0	0	0
>contig34277|size82|read16|cov6.99_315137	H-probe	0	0	0	0	0	0	0	0	0	0	0	0	0	0	0	0	0	0	0	0	0	0	0		0	0	0	0	0	0	0	0		0			0	0	0	0	0	0	0	0	0	0	0	0
>contig3442|size64|read24|cov12.94_015213	H-probe	0	0.784212	-0.521246	0	0	0	0	0	0	-0.391157	0	0	0	0.782686	-0.521246	0	0.785761	0	0	0	0	-0.391157	0		1.62912	0.724835	-0.521246	0.768538	0	0	0	0		-0.391157			0	0	-0.521246	0	0	0.822693	0	0.395779	0	-0.391157	0	0
>contig34521|size84|read19|cov6.87_1015263	H-probe	0	0	0	0	0	0	0	0	0	0	0	0	0	0	0	0	0	0	0	0	0	0	0		0	0	0	0	0	0	0	0		0			0	0	0	0	0	0	0	0	0	0	0	0
>contig34539|size65|read14|cov7.15_315270	H-probe	0	0	0	0	0	0	0	0	0	0	0	0	0	0	0	0	0	0	0	0	0	0	0		0	0	0	0	0	0	0	0		0			0	0	0	0	0	0	0	0	0	0	0	0
>contig34546|size79|read12|cov5.30_1815274	H-probe	0	0.261449	-0.628732	0	-0.883673	0.84832	0	0	-0.698952	0	0	0	0	-0.522764	-0.610305	0	-0.0979114	0	0	0	-0.698952	0	0		1.03325	0.202072	-0.56841	0	-0.883673	0	1.70235	0		1.68605			2.06426	-0.522764	-1.24193	0	-0.883673	0	0	0	-0.698952	1.04038	0	0
>contig34601|size84|read18|cov7.27_2415300	H-probe	-2.71407	2.67233	-3.20921	0.134044	-4.38017	-1.3905	0.65608	-1.14308	-0.130271	-3.72999	0	-2.53124	-4.15534	-0.555445	-3.67155	-1.48562	-2.67625	-4.18594	0.613609	-1.95556	-0.409101	-3.72999	0		3.17677	3.00918	-1.03474	-0.113767	-0.909755	-2.56807	0.78038	-0.788125		2.08874			0.62698	0.852153	-2.65647	-1.51336	-5.11127	-3.79987	-0.889411	1.60977	1.12245	-0.0718393	0	-2.53124
>contig3462|size85|read18|cov7.12_1115314	H-probe	0	0	0	0	0	0	0	0	0	0	0	0	0	0	0	0	0	0	0	0	0	0	0		0	0	0	0	0	0	0	0		0			0	0	0	0	0	0	0	0	0	0	0	0
>contig3467|size70|read11|cov5.63_715337	H-probe	0	0	0	0	0	0	0	0	0	0	0	0	0	0	0	0	0	0	0	0	0	0	0		0	0	0	0	0	0	0	0		0			0	0	0	0	0	0	0	0	0	0	0	0
>contig34671|size85|read25|cov10.51_715334	H-probe	0	0	0	0	0	0	0	0	0	0	0	0	0	0	0	0	0	0	0	0	0	0	0		0	0	0	0	0	0	0	0		0			0	0	0	0	0	0	0	0	0	0	0	0
>contig34873|size108|read27|cov8.76_4715433	H-probe	0	0	0	0	0	0	0	0	0	0	0	0	0	0	0	0	0	0	0	0	0	0	0		0	0	0	0	0	0	0	0		0			0	0	0	0	0	0	0	0	0	0	0	0
>contig35117|size60|read10|cov5.73_015554	H-probe	0	0	0	0	0	0.84832	0	0	0	0	0	0	0	0.782686	0	0	0	0	0	0	0	0	0		0	0	0	0.768538	0	0	0	0		0			0	0	0	0	0	0	0	0	0	0	0	0
>contig3512|size70|read24|cov10.86_015562	H-probe	-0.65163	0.17636	-0.153205	-1.06375	-2.02132	-0.730621	0.752744	-0.277374	-1.07586	-1.49798	-1.75515	-3.96379	-1.07061	-0.783705	0.436494	-1.64346	-1.23865	-1.72335	0.63176	-0.713485	0.0533077	-1.85644	2.79527		1.80092	1.87095	2.13898	1.31491	1.46105	-0.152839	2.50974	1.52967		1.19895			0.106192	-0.526942	-0.753543	-0.436469	-1.9964	-1.81567	0.314469	1.65404	-0.381776	-0.381628	-0.859185	-2.40824
>contig3527|size122|read32|cov9.36_615636	H-probe	0	0	0	0	0	0	0	0	0	0	0	0	0	0	0	0	0	0	0	0	0	0	0		0	0	0	0	0	0	0	0		0			0	0	0	0	0	0	0	0	0	0	0	0
>contig35448|size82|read17|cov7.29_615725	H-probe	0	0	0	0	0	0	0	0	0	0	0	0	0	0	0	0	0	0	0	0	0	0	0		0	0	0	0	0	0	0	0		0			0	0	0	0	0	0	0	0	0	0	0	0
>contig35456|size74|read12|cov5.70_1115732	H-probe	0	0	0	0	0	0	0	0	0	0	0	0	0	0	0	0	0	0	0	0	0	0	0		0	0	0	0	0	0	0	0		0			0	0	0	0	0	0	0	0	0	0	0	0
>contig35613|size95|read27|cov9.18_515811	H-probe	0	0	0	0	0	0	0	0	0	0	0	0	0	0	0	0	0	0	0	0	0	0	0		0	0	0	0	0	0	0	0		0			0	0	0	0	0	0	0	0	0	0	0	0
>contig35722|size63|read12|cov6.71_015854	H-probe	0	0	0	0	0	0	0	0	0	0	0	0	0	0	0	0	0	0	0	0	0	0	0		0	0	0	0	0	0	0	0		0			0	0	0	0	0	0	0	0	0	0	0	0
>contig35730|size62|read10|cov5.61_115857	H-probe	0.102703	-1.96366	0.918629	0.0161164	-0.648905	1.76605	1.38006	0	0.4579	-0.318227	-1.12948	-1.61275	-0.304129	-0.30328	0.456297	-0.475739	-0.136072	1.67643	1.22879	0	0.244661	-1.36235	-1.12948		1.03619	0.333907	1.24355	1.44917	1.05089	1.33492	-0.763824	2.24438		-1.36235			0.725698	-0.355065	0.447489	-0.503483	0.441843	1.34336	-0.763824	0.742903	-0.738654	-1.36235	-0.23352	-0.0571973
>contig3596|size95|read38|cov14.34_1215978	H-probe	0	0.784212	0	0	0	0.84832	1.11631	0	0	0	0	0	0	0.782686	0	0	0	0	0.673232	0	0	0	0		1.03325	0	0.673517	0	0	0	-0.321848	0		0			0	0	0	0	0	0	-0.321848	0.395779	0.753132	0	0	0
>contig36056|size106|read35|cov11.10_4616020	H-probe	0	0	0	0	0	0	0	0	0	0	0	0	0	0	0	0	0	0	0	0	0	0	0		0	0	0	0	0	0	0	0		0			0	0	0	0	0	0	0	0	0	0	0	0
>contig3615|size102|read32|cov10.94_016072	H-probe	0	0	0	0	0	0	0	0	0	0	0	0	0	0	0	0	0	0	0	0	0	0	0		0	0	0	0	0	0	0	0		0			0	0	0	0	0	0	0	0	0	0	0	0
>contig36688|size112|read22|cov6.94_216305	H-probe	0	0	0	0	0	0	0	0	0	0	0	0	0	0	0	0	0	0	0	0	0	0	0		0	0	0	0	0	0	0	0		0			0	0	0	0	0	0	0	0	0	0	0	0
>contig3676|size60|read15|cov8.93_016341	H-probe	0	0	0	0	0	0	0	0	0	0	0	0	0	0	0	0	0	0	0	0	0	0	0		0	0.724835	0	0	0.72539	0	0	0		0			0	0.75119	0	0	0	0	0	0	0	0	0	1.55555
>contig36894|size84|read14|cov5.94_2316384	H-probe	0	-0.734751	-0.591936	1.2956	0	0.84832	0	0	-0.698952	0	0	0	0	-0.734751	-1.20513	0	0	0	1.5784	0	-0.698952	0	0		0	-0.00991554	-0.531614	0	0.72539	1.33492	0	0		0			0	0.50792	-1.20513	0	0.734246	0	0	0	-0.698952	0	0	0
>contig36923|size63|read10|cov5.43_316398	H-probe	0	0	0	0	0	0	0	0	0	0	0	0	0	0	0	0	0	0	0	0	0	0	0		0	0	0	0	0	0	0	0		0			0	0	0	0	0	0	0	0	0	0	0	0
>contig3716|size61|read21|cov9.82_016512	H-probe	0	0	0	0	0	0	0	0	0	0	0	0	0	0	0	0	0	0	0	0	0	0	0		0	0	0	0	0	0	0	0		0			0	0	0	0	0	0	0	0	0	0	0	0
>contig37238|size89|read20|cov7.98_1116545	H-probe	1.6807	1.07484	-2.80534	-0.97679	-0.16781	-1.66267	0.387349	0	0	-0.391157	0	0	-0.362272	-0.3999	-0.477573	-1.32994	-0.156396	-3.04163	-1.05081	0.990922	0	0.81512	0		-1.83413	-2.74038	-2.71661	-1.87827	-1.82179	-3.04163	-1.05081	0		-0.391157			0.519139	-0.590021	-0.569064	-0.702135	-1.08755	-1.69827	0.229233	0	0	-0.391157	0	0
>contig37269|size70|read10|cov5.13_016557	H-probe	0	0	0	0	0	0	0	0	0	0	0	0	0	0	0	0	0	0	0	0	0	0	0		0	0	0	0	0	0	0	0		0			0	0	0	0	0	0	0	0	0	0	0	0
>contig37457|size115|read44|cov12.85_016651	H-probe	0	0	0	0	0	0	0	0	0	0	0	0	0	0	0	0	0	0	0	0	0	0	0		0	0	0	0	0	0	0	0		0			0	0	0	0	0	0	0	0	0	0	0	0
>contig37547|size89|read15|cov5.61_2616685	H-probe	2.1477	-0.284931	-0.521246	-0.400107	0	0.84832	0	-0.91049	0	-0.983536	0	0	0	-0.284931	-0.521246	-0.400107	0	0	0.99508	-0.91049	0	-0.983536	0		0	-0.284931	-0.521246	0.86718	0	1.33492	0	-0.91049		-0.983536			0	0.466259	-0.521246	-0.400107	0	0	0	-0.91049	0	-0.983536	0	0
>contig3781|size93|read40|cov15.30_116786	H-probe	0	0	0	0	0	0	0	0	0	0	0	0	0	0	0	0	0	0	0	0	0	0	0		0	0	0	0	0	0	0	0		0			0	0	0	0	0	0	0	0	0	0	0	0
>contig37850|size73|read13|cov6.36_116806	H-probe	0	0	0	0	0	0	0	0	0	0	0	0	0	0	0	0	0	0	0	0	0	0	0		0	0	0	0	0	0	0	0		0			0	0	0	0	0	0	0	0	0	0	0	0
>contig38241|size64|read12|cov6.08_416958	H-probe	0	0	0	-0.400107	-0.883673	-1.77036	-0.321848	0	0	0	0	0	0	0	0	-0.400107	-0.883673	-1.77036	0.673232	0	0	0	0		2.04958	0	1.13087	-0.400107	-0.883673	0.245856	-0.321848	0.698714		0			0	0.75119	0	-0.400107	-0.883673	-1.77036	-0.321848	0	0	0	0	0
>contig38295|size78|read14|cov5.74_1516978	H-probe	0	0	0	0	0	0	0	0	0	0	0	0	0	0	0	0	0	0	0	0	0	0	0		0	0	0	0	0	0	0	0		0			0	0	0	0	0	0	0	0	0	0	0	0
>contig38326|size94|read15|cov5.66_3016990	H-probe	-0.968928	0.202831	-1.93235	-0.419641	-0.648905	1.37896	-0.699233	0	0	1.04413	0	-1.2395	-1.28705	-0.929174	-1.14176	0.0658744	-1.42768	1.67643	-0.699233	0	0	0	4.55042		-4.67039	-2.43545	-2.44236	-2.38665	-1.42768	0	-0.699233	0.698714		0			-2.01419	-1.15639	-0.466374	-0.73721	-1.42768	0	-0.699233	0.724583	0	0	0	-1.2395
>contig3843|size241|read67|cov9.91_3717033	H-probe	0	0	0	0	0	0	0	0	0	0	0	0	0	0	0	0	0	0	0	0	0	0	0		0	0	0	0	0	0	0	0		0			0	0	0	0	0	0	0	0	0	0	0	0
>contig38456|size91|read17|cov6.44_2017044	H-probe	0	0	0	0	0	0	0	0	0	0	0	0	0	0	0	0	0	0	0	0	0	0	0		0	0	0	0	0	0	0	0		0			0	0	0	0	0	0	0	0	0	0	0	0
>contig38526|size65|read11|cov6.06_017074	H-probe	0	0	0	0	0	0	0	0	0	0	0	0	0	0	0	0	0	0	0	0	0	0	0		0	0	0	0	0	0	0	0		0			0	0	0	0	0	0	0	0	0	0	0	0
>contig38535|size65|read15|cov8.28_017076	H-probe	0	0	0	0	0	0	0	0	0	0	0	0	0	0	0	0	0	0	0	0	0	0	0		0	0	0	0	0	0	0	0		0			0	0	0	0	0	0	0	0	0	0	0	0
>contig3867|size133|read32|cov8.59_917130	H-probe	0	0	0	0	0	0	0	0	0	0	0	0	0	0	0	0	0	0	0	0	0	0	0		0	0	0	0	0	0	0	0		0			0	0	0	0	0	0	0	0	0	0	0	0
>contig38673|size67|read11|cov5.87_217127	H-probe	0	0	0	0	0	0	0	0	0	0	0	0	0	0	0	0	0	0	0	0	0	0	0		0	0	0	0	0	0	0	0		0			0	0	0	0	0	0	0	0	0	0	0	0
>contig39110|size118|read28|cov8.41_5217312	H-probe	0	0	0	0	0	0	0	0	0	0	0	0	0	0	0	0	0	0	0	0	0	0	0		0	0	0	0	0	0	0	0		0			0	0	0	0	0	0	0	0	0	0	0	0
>contig39389|size65|read17|cov9.20_517398	H-probe	0	-0.275907	-0.628732	0	0	0.84832	-0.321848	0	0	-0.391157	0	0	1.03444	-0.275907	-1.24193	0	0	0	-0.321848	0	0	-0.391157	0		0	-0.275907	-0.111053	0.768538	0.72539	0	-0.321848	0.698714		-0.391157			1.64223	-0.275907	-1.24193	0	0	0	-0.321848	0	0	-0.391157	0	0
>contig3965|size96|read33|cov12.01_3017523	H-probe	0	0	0	0	0	0	-0.321848	0	0	-0.30955	0	-0.422548	0	0	0	5.86822	0	0	-0.321848	0	0	-0.30955	0		1.03325	0	0	0	0	0	-0.321848	0.698714		-0.30955			0	0	0	0	0	0	-0.321848	0	0	-0.30955	0	-0.422548
>contig3982|size87|read26|cov10.71_1417588	H-probe	0	0	0	0	0	0	0	0	0	0	0	0	0	0	0	0	0	0	0	0	0	0	0		0	0	0	0	0	0	0	0		0			0	0	0	0	0	0	0	0	0	0	0	0
>contig39836|size68|read12|cov6.04_817589	H-probe	0	0	0	0	0	0	0	0	0	0	0	0	0	0	0	0	0	0	0	0	0	0	0		0	0	0	0	0	0	0	0		0			0	0	0	0	0	0	0	0	0	0	0	0
>contig4010|size302|read154|cov18.20_10017689	H-probe	0	0	0	0	0	0	0	0	0	0	0	0	0	0	0	0	0	0	0	0	0	0	0		0	0	0	0	0	0	0	0		0			0	0	0	0	0	0	0	0	0	0	0	0
>contig4010|size302|read154|cov18.20_100268	H-probe	0	0	0	0	0	0	0	0	0	0	0	0	0	0	0	0	0	0	0	0	0	0	0		0	0	0	0	0	0	0	0		0			0	0	0	0	0	0	0	0	0	0	0	0
>contig40108|size84|read13|cov5.45_2017688	H-probe	0	0	0	0	0	0.84832	0	0	-1.16778	-0.698565	0	0	0	0	0.631622	0	0	0	0.99508	0	-1.16778	-0.698565	0		1.03325	0.724835	0.673517	1.26729	0.72539	0	0	0		-0.698565			2.06426	0	0	0	0	0	0	0	-1.16778	-0.698565	0	1.55555
>contig40549|size60|read11|cov6.52_017854	H-probe	0	0	-0.521246	0.788596	0	0	0	0	0	0	0	-1.02677	0	0	0.110377	0	0	0	0.99508	0	0	0	0		0	1.20503	-0.521246	0	0.72539	0	0	0.698714		0			1.64223	0.75119	-0.521246	0	0	0.822693	0	0	0	0	0	-1.02677
>contig40560|size63|read12|cov6.30_317861	H-probe	0	0	0	0	0	0	0	0	0	0	0	0	0	0	0	0	0	0	0	0	0	0	0		0	0	0	0	0	0	0	0		0			0	0	0	0	0	0	0	0	0	0	0	0
>contig4066|size76|read43|cov18.37_017906	H-probe	-2.48207	-1.24217	-1.41335	-2.03566	-5.78357	-3.91771	-2.79301	-1.46434	-0.0570434	-2.22711	0	-3.65191	-2.48207	-4.14894	-2.78571	-2.03566	-4.11817	-5.27755	-0.478959	-1.46434	-0.915231	-2.22711	0		-0.432488	-1.23684	-2.11219	-2.03566	-3.48488	-6.95398	-2.79301	-0.765624		-0.113877			-2.48207	-2.24871	-2.78571	-2.03566	-5.04932	-6.13128	-2.79301	0.814001	0.00518308	-2.22711	0	-3.65191
>contig4086|size81|read22|cov9.26_1117983	H-probe	0	0	0	0	0	0	0	0	0	0	0	0	0	0	0	0	0	0	0	0	0	0	0		0	0	0	0	0	0	0	0		0			0	0	0	0	0	0	0	0	0	0	0	0
>contig41459|size94|read21|cov7.90_918219	H-probe	0	0	0	0	0	0	0	0	0	0	0	0	0	0	0	0	0	0	0	0	0	0	0		0	0	0	0	0	0	0	0		0			0	0	0	0	0	0	0	0	0	0	0	0
>contig41599|size64|read20|cov10.92_418271	H-probe	0	0	0	0	0	0	0	0	0	0	0	0	0	0	0	0	0	0	0	0	0	0	0		0	0	0	0	0	0	0	0		0			0	0	0	0	0	0	0	0	0	0	0	0
>contig41959|size106|read33|cov10.61_3218412	H-probe	0	0	0	0	0	0	0	0	0	0	0	0	0	0	0	0	0	0	0	0	0	0	0		0	0	0	0	0	0	0	0		0			0	0	0	0	0	0	0	0	0	0	0	0
>contig42031|size64|read10|cov5.59_018432	H-probe	0	0	0	0	0	0	0	0	0	0	0	0	0	0	0	0	0	0	0	0	0	0	0		0	0	0	0	0	0	0	0		0			0	0	0	0	0	0	0	0	0	0	0	0
>contig42505|size81|read24|cov10.41_2018587	H-probe	0	0	0	0	0	0	0	0	0	0	0	0	0	0	0	0	0	0	0	0	0	0	0		0	0	0	0	0	0	0	0		0			0	0	0	0	0	0	0	0	0	0	0	0
>contig42522|size62|read13|cov6.74_018595	H-probe	0	-0.507423	-0.591936	0	0	-1.77036	0	0	0	0	0	-0.602865	1.03444	-0.507423	-0.573508	0.803741	0	-1.77036	0	0	0	0	0		2.63995	0.697609	-0.0742571	0.768538	0.72539	-1.77036	0	0		0			1.04316	-0.507423	-0.57852	0	0	-1.77036	0	0	0	0	0	-0.602865
>contig4281|size63|read36|cov20.10_018701	H-probe	0	0	0	0	0	0	0	0	0	0	0	0	0	0	0	0	0	0	0	0	0	0	0		0	0	0	0	0	0	0	0		0			0	0	0	0	0	0	0	0	0	0	0	0
>contig4298|size67|read28|cov14.88_618769	H-probe	0	0	0	0	0	0	0	0	0	0	0	0	0	0	0	0	0	0	0	0	0	0	0		0	0	0	0	0	0	0	0		0			0	0	0	0	0	0	0	0	0	0	0	0
>contig431|size73|read34|cov15.63_1318843	H-probe	-3.02891	-2.1627	-2.81126	-2.04892	-6.42998	-4.29077	-2.211	-4.38949	0.122248	-5.18211	-1.12948	-6.59211	-4.14216	-5.09381	-2.89442	-3.78063	-5.79941	-5.71459	0.501265	-1.92814	-1.32054	-5.18211	-1.12948		-0.721606	-1.76881	-2.44086	-2.36885	-4.38324	-4.95447	-3.76396	-5.01988		0.248741			-4.13344	-3.09723	-3.2005	-2.90787	-6.8631	-7.09169	-3.0643	-0.747406	-0.346709	-1.94116	-1.12948	-3.46154
>contig43100|size80|read25|cov11.14_2018812	H-probe	0	0	0	0	0	0	0	0	0	0	0	0	0	0	0	0	0	0	0	0	0	0	0		0	0	0	0	0	0	0	0		0			0	0	0	0	0	0	0	0	0	0	0	0
>contig43151|size61|read12|cov6.95_118828	H-probe	0	0	0	0	0	0	0	0	0	0	0	0	0	0	0	0	0	0	0	0	0	0	0		0	0	0	0	0	0	0	0		0			0	0	0	0	0	0	0	0	0	0	0	0
>contig4332|size83|read36|cov15.06_2218891	H-probe	0	0	0	0	0	0	0	0	0	0	0	0	0	0	0	0	0	0	0	0	0	0	0		0	0	0	0	0	0	0	0		0			0	0	0	0	0	0	0	0	0	0	0	0
>contig43441|size73|read14|cov6.75_218924	H-probe	0	0	-0.521246	0	0	0	0	0	0	0	0	0	0	0	-0.521246	0	0	0	0	0	0	0	0		0	0	-0.521246	0	0	0	0	0		0			0	0	-0.521246	0	0	0	0	0	0	0	0	0
>contig4361|size65|read18|cov9.57_418989	H-probe	0	0	0	0	0	0	0	0	0	0	0	0	0	0	0	0	0	0	0	0	0	0	0		0	0	0	0	0	0	0	0		0			0	0	0	0	0	0	0	0	0	0	0	0
>contig440|size64|read49|cov26.48_419147	H-probe	0	0	0	0	0	0	0	0	0	0	0	0	0	0	0	0	0	0	0	0	0	0	0		0	0	0	0	0	0	0	0		0			0	0	0	0	0	0	0	0	0	0	0	0
>contig44027|size82|read13|cov5.56_319126	H-probe	0	0	0	0	0	0	0	0	0	0	0	0	0	0	0	0	0	0	0	0	0	0	0		0	0	0	0	0	0	0	0		0			0	0	0	0	0	0	0	0	0	0	0	0
>contig44422|size65|read10|cov5.34_019273	H-probe	0	0	0	0	0	0	0	0	0	0	0	0	0	0	0	0	0	0	0	0	0	0	0		0	0	0	0	0	0	0	0		0			0	0	0	0	0	0	0	0	0	0	0	0
>contig44776|size75|read25|cov9.43_1519401	H-probe	1.44127	-1.35659	1.37236	-0.0818208	-1.42768	0.84832	0.904046	-0.999629	-1.27713	-1.48365	-2.19011	-1.13705	0	-1.35811	0.631622	-1.37742	-1.42768	0	1.4585	0.573217	-0.293816	0.370282	-2.19011		2.63995	1.00203	2.52598	1.00698	1.60563	0	1.92757	1.24475		0.629591			0	-2.1408	1.89517	0.567251	-0.209172	0.822693	-0.534116	-0.0228422	-1.27713	-0.443263	-2.19011	-1.13705
>contig45136|size86|read13|cov5.37_219510	H-probe	0	0	0.613195	0	0	0	0	0	0	-0.391157	0	0	0	0	0	0	0	0	0	0	0	-0.391157	0		0	0	0	0	0	0	0	0		-0.391157			0	0	0.626611	0	0	0	0	0	0	-0.391157	0	0
>contig45254|size60|read13|cov7.58_019551	H-probe	0	0	0	0	0	0	0	0	0	0	0	0	0	0	0	0	0	0	0	0	0	0	0		0	0	0	0	0	0	0	0		0			0	0	0	0	0	0	0	0	0	0	0	0
>contig4526|size82|read19|cov8.28_1019557	H-probe	0	0	0	0	0	0	0	0	0	0	0	0	0	0	0	0	0	0	0	0	0	0	0		0	0	0	0	0	0	0	0		0			0	0	0	0	0	0	0	0	0	0	0	0
>contig45404|size65|read16|cov8.25_519598	H-probe	0	0	0	0	0	0	0	0	0	0	0	0	0	0	0	0	0	0	0	0	0	0	0		0	0	0	0	0	0	0	0		0			0	0	0	0	0	0	0	0	0	0	0	0
>contig45533|size90|read22|cov8.14_1319638	H-probe	0	-0.906787	0.613195	0	0.778772	0.84832	1.11631	0.81248	-0.253327	0	0	-0.422548	0	-0.906787	0.631622	0	0	0	-0.321848	0	-0.253327	0	0		0	-0.181951	1.75695	2.17559	0.72539	2.01622	-0.321848	1.16743		1.07647			0	-0.906787	0	0	0	0	-0.321848	0	0.499805	0	0	-0.422548
>contig45622|size87|read17|cov6.60_1919670	H-probe	0	0	0	0	0	0	0	0	0	0	0	0	0	0	0	0	0	0	0	0	0	0	0		0	0	0	0	0	0	0	0		0			0	0	0	0	0	0	0	0	0	0	0	0
>contig45749|size62|read9|cov5.19_119712	H-probe	0	0	0	0	0	0	0	0	0	0	0	0	0	0	0	0	0	0	0	0	0	0	0		0	0	0	0	0	0	0	0		0			0	0	0	0	0	0	0	0	0	0	0	0
>contig45798|size64|read20|cov10.83_019733	H-probe	0	0	0	0	0	0	0	0	0	0	0	0	0	0	0	0	0	0	0	0	0	0	0		0	0	0.673517	0	0.72539	0	0	0		0			0	0	0	0	0	0	0	0	0	0	0	0
>contig45824|size70|read20|cov9.77_619741	H-probe	1.44127	-0.304515	0.613195	-0.479388	0	0	-0.321848	0	0	-0.632981	0	-0.422548	0	-0.304515	0.631622	-0.479388	0.785761	0	-0.321848	0	0	-0.632981	0		1.62912	0.900517	1.47761	-0.479388	0.72539	1.33492	-0.321848	0.698714		-0.632981			1.04316	0.446675	0	-0.479388	0	0	-0.321848	0.395779	0	-0.632981	0	-0.422548
>contig45992|size73|read14|cov6.86_819806	H-probe	0	0	0	0	0	0	0	0	0	0	0	0	0	0	0	0	0	0	0	0	0	0	0		0	0	0	0	0	0	0	0		0			0	0	0	0	0	0	0	0	0	0	0	0
>contig4618|size84|read30|cov12.79_1419880	H-probe	0	0	0	0	0	0	0	0	0	0	0	0	0	0	0	0	0	0	0	0	0	0	0		0	0	0	0	0	0	0	0		0			0	0	0	0	0	0	0	0	0	0	0	0
>contig4637|size181|read75|cov14.72_3519937	H-probe	0	0	0	0	0	0	0	0	0	0	0	0	0	0	0	0	0	0	0	0	0	0	0		0	0	0	0	0	0	0	0		0			0	0	0	0	0	0	0	0	0	0	0	0
>contig46584|size67|read11|cov5.72_020003	H-probe	0	-0.284931	-1.20513	0.309208	0	0.84832	0	0	-0.698952	-0.391157	0	-1.2496	2.05135	0.497755	-0.573508	0.837479	0	0	0	0	-0.698952	-0.391157	0		1.03325	0.439904	-0.531614	0.289151	1.20583	1.33492	0	0.698714		-0.391157			0	-0.284931	-0.57852	0.29661	0	0	0	0.395779	-0.698952	-0.391157	0	-1.2496
>contig46926|size86|read20|cov8.07_2220118	H-probe	1.44127	0.984909	0	0	-0.883673	0	-0.534116	-0.999629	-0.93209	-0.391157	0	0	1.03444	-0.304515	0	0	-0.883673	1.06914	-0.534116	-0.00870661	-0.93209	-0.391157	0		0	-0.304515	1.47761	1.93137	-0.883673	1.33492	-0.534116	-0.300915		0.685313			0	-0.304515	0.626611	0	-0.149427	0	-0.534116	-0.256726	-0.93209	-0.391157	0	0
>contig46998|size112|read18|cov5.64_220142	H-probe	0	0	0	0	0	0	0	0	0	0	0	0	0	0	0	0	0	0	0	0	0	0	0		0	0	0	0	0	0	0	0		0			0	0	0	0	0	0	0	0	0	0	0	0
>contig4701|size62|read17|cov9.08_120149	H-probe	0	0	0	0	0	0	0	0	0	0	0	0	0	0	0	0	0	0	0	0	0	0	0		0	0	0	0	0	0	0	0		0			0	0	0	0	0	0	0	0	0	0	0	0
>contig47345|size81|read17|cov7.41_1020258	H-probe	0	0	0	0	-0.883673	0	-0.321848	0	-0.698952	-0.391157	0	0	0	0	0	0	-0.883673	0	-0.321848	0	-0.698952	-0.391157	0		1.03325	0	0	0	-0.158283	0	-0.321848	0		-0.391157			0	0	0	0	-0.883673	0	-0.321848	0	-0.698952	-0.391157	0	0
>contig4736|size123|read47|cov13.59_2120265	H-probe	0	0	0	0	0	0	0	0	0	0	0	0	0	0	0	0	0	0	0	0	0	0	0		0	0	0	0	0	0	0	0		0			0	0	0	0	0	0	0	0	0	0	0	0
>contig47658|size91|read14|cov5.47_1620347	H-probe	0	0	0	0	0	0	0	0	0	0	0	0	0	0	0	0	0	0	0	0	0	0	0		0	0	0	0	0	0	0	0		0			0	0	0	0	0	0	0	0	0	0	0	0
>contig48063|size80|read14|cov6.26_920479	H-probe	0	0	0	0	0	0	0	0	0	0	0	0	0	0	0	0	0	0	0	0	0	0	0		0	0	0	0	0	0	0	0		0			0	0	0	0	0	0	0	0	0	0	0	0
>contig481|size92|read75|cov25.39_2920517	H-probe	-3.02891	-2.1627	-2.81126	-2.04892	-6.42998	-4.29077	-2.211	-4.38949	0.122248	-5.18211	-1.12948	-6.59211	-4.14216	-5.09381	-2.89442	-3.78063	-5.79941	-5.71459	0.501265	-1.92814	-1.32054	-5.18211	-1.12948		-0.721606	-1.76881	-2.44086	-2.36885	-4.38324	-4.95447	-3.76396	-5.01988		0.248741			-4.13344	-3.09723	-3.2005	-2.90787	-6.8631	-7.09169	-3.0643	-0.747406	-0.346709	-1.94116	-1.12948	-3.46154
>contig48115|size80|read21|cov9.04_520496	H-probe	0	0	0	0	0	0	0	0	0	0	0	0	0	0	0	0	0	0	0	0	0	0	0		0	0	0	0	0	0	0	0		0			0	0	0	0	0	0	0	0	0	0	0	0
>contig48146|size65|read18|cov9.51_320504	H-probe	0	0	0	0	0	0	0	0	0	0	0	0	0	0	0	0	0	0	0	0	0	0	0		0	0	0	0	0	0	0	0		0			0	0	0	0	0	0	0	0	0	0	0	0
>contig48178|size69|read11|cov5.70_020511	H-probe	0	0	0	0	0	0	0	0	0	0	0	0	0	0	0	0	0	0	0	0	0	0	0		0	0	0	0	0	0	0	0		0			0	0	0	0	0	0	0	0	0	0	0	0
>contig4829|size78|read20|cov8.04_1820553	H-probe	0	0	0	0	0	0	0	0	0	0	0	0	0	0	0	0	0	0	0	0	0	0	0		0	0	0	0	0	0	0	0		0			0	0	0	0	0	0	0	0	0	0	0	0
>contig4847|size96|read32|cov11.15_920603	H-probe	0	0	0	0	0	0	0	0	0	0	0	0	0	0	0	0	0	0	0	0	0	0	0		0	0	0	0	0	0	0	0		0			0	0	0	0	0	0	0	0	0	0	0	0
>contig48498|size67|read14|cov7.34_020610	H-probe	0	0	0	0	0	0	0	0	0	0	0	0	0	0	0	0	0	0	0	0	0	0	0		0	0	0	0	0	0	0	0		0			0	0	0	0	0	0	0	0	0	0	0	0
>contig48512|size60|read12|cov7.17_020618	H-probe	0	0	0	0	0	0	0	0	0	0	0	0	0	0	0	0	0	0	0	0	0	0	0		0	0	0	0	0	0	0	0		0			0	0	0	0	0	0	0	0	0	0	0	0
>contig48798|size110|read23|cov7.45_420699	H-probe	0	0	0	0	0	0	0	0	0	0	0	0	0	0	0	0	0	0	0	0	0	0	0		0	0	0	0	0	0	0	0		0			0	0	0	0	0	0	0	0	0	0	0	0
>contig48926|size78|read15|cov6.17_020740	H-probe	0	-0.284931	-0.903337	-0.400107	-0.883673	-3.04163	0	0	0	-0.391157	0	-0.748964	0	-0.284931	-0.903337	-0.400107	-0.883673	-3.04163	0	0	0	-0.391157	0		1.03325	0.920101	-0.903337	-0.400107	0.322154	-3.04163	0	0		-0.391157			0	-0.284931	-0.903337	-0.400107	-0.883673	-3.04163	0	0	0	-0.391157	0	-0.748964
>contig4896|size73|read16|cov7.63_720748	H-probe	0	0	0	0	0	0	0	0	0	0	0	0	0	0	0	0	0	0	0	0	0	0	0		0	0	0	0	0	0	0	0		0			0	0	0	0	0	0	0	0	0	0	0	0
>contig49532|size93|read19|cov7.25_620930	H-probe	0	0	0	0	0	0	0	0	0	0	0	0	0	0	0	0	0	0	0	0	0	0	0		0	0	0	0	0	0	0	0		0			0	0	0	0	0	0	0	0	0	0	0	0
>contig49697|size70|read16|cov7.39_1020974	H-probe	0	0	0	0	0	0	0	0	0	0	0	0	0	0	0	0	0	0	0	0	0	0	0		0	0	0	0	0	0	0	0		0			0	0	0	0	0	0	0	0	0	0	0	0
>contig4978|size76|read15|cov7.04_921015	H-probe	0	0	0	0	0	0	0	0	0	0	0	0	0	0	0	0	0	0	0	0	0	0	0		0	0	0	0	0	0	0	0		0			0	0	0	0	0	0	0	0	0	0	0	0
>contig4979|size67|read12|cov5.87_021016	H-probe	-3.11187	-1.95915	-1.7913	-1.5264	-5.37383	-3.22595	-3.613	-3.51037	-1.15828	-3.3551	0	-4.59335	-3.11187	-3.93715	-3.43219	-3.73958	-4.86099	-6.49378	0.377766	-1.93752	-1.43711	-3.3551	0		-0.471912	-1.9386	-2.75867	-2.97104	-3.37016	-5.08581	-3.613	-1.98974		-0.912693			-3.11187	-1.88217	-3.43219	-3.73958	-5.41835	-6.74023	-2.33295	-0.4459	-0.026268	-3.3551	0	-4.59335
>contig49816|size64|read18|cov9.56_221024	H-probe	0	0	0	0	0	0	0	0	0	0	0	0	0	0	0	0	0	0	0	0	0	0	0		0	0	0	0	0	0	0	0		0			0	0	0	0	0	0	0	0	0	0	0	0
>contig50110|size69|read11|cov5.52_721129	H-probe	0	0	0	0	0	0	0	0	0	0	0	0	0	0	0	0	0	0	0	0	0	0	0		0	0	0	0	0	0	0	0		0			0	0	0	0	0	0	0	0	0	0	0	0
>contig50175|size82|read20|cov8.70_1721148	H-probe	0	0	0	0	0	0	0	0	0	0	0	0	0	0	0	0	0	0	0	0	0	0	0		0	0	0	0	0	0	0	0		0			0	0	0	0	0	0	0	0	0	0	0	0
>contig50250|size60|read11|cov5.00_021170	H-probe	-2.83107	-1.35504	-1.96311	-2.02044	-6.7018	-3.51846	-3.51753	-1.52565	0.914521	-2.88042	0	-4.1981	-2.83107	-3.34479	-2.97238	-3.31604	-4.7398	-7.38704	-0.940778	-1.52565	0.342037	-2.88042	0		-0.456307	-1.00405	-1.84705	-2.04875	-3.91936	-4.04567	-3.51753	-1.52565		-0.170175			-1.78791	-1.80382	-3.604	-3.31604	-5.96755	-6.04368	-3.51753	1.42955	1.44636	-1.24187	0	-4.1981
>contig5032|size61|read11|cov6.18_021195	H-probe	0	-1.91253	-2.38206	-0.652496	-5.27218	-3.37342	-3.62779	-1.69899	1.33801	-2.7991	0	-3.86905	1.03444	-4.11753	-2.01935	-2.61951	-5.26233	-6.58296	-0.0518638	-1.04172	-1.25271	-2.7991	0		2.37476	-2.9125	-1.9466	-1.85097	-3.91545	-4.31073	-1.92544	-3.02809		1.14719			0	-1.42478	-3.42421	-1.84351	-6.55393	-7.6521	-2.34775	-0.0807592	-0.461296	-1.75872	0	-3.86905
>contig50479|size70|read11|cov5.31_1021247	H-probe	0	0	0	0	0	0	0	0	0	0	0	0	0	0	0	0	0	0	0	0	0	0	0		0	0	0	0	0	0	0	0		0			0	0	0	0	0	0	0	0	0	0	0	0
>contig50656|size71|read11|cov5.55_021304	H-probe	0	0	0	0	0	0	0	0	0	0	0	0	0	0	0	0	0	0	0	0	0	0	0		0	0	0	0	0	0	0	0		0			0	0	0	0	0	0	0	0	0	0	0	0
>contig5098|size77|read23|cov8.91_521414	H-probe	-2.48207	-1.09037	-1.95865	-2.90658	-5.12113	-3.53427	-2.30854	-2.07454	1.40323	-2.1912	0	-3.44208	-2.48207	-2.90583	-3.00079	-2.90658	-3.15913	-6.57053	0.00550654	-1.89609	0.479033	-2.1912	0		-0.432488	-1.39095	-2.32727	-1.63929	-2.82244	-4.55431	-2.30854	-2.88702		-1.11473			-1.43891	-1.5458	-2.37418	-2.90658	-5.12113	-5.74784	-2.30854	-1.35399	0.858216	-2.1912	0	-3.44208
>contig51559|size70|read15|cov7.47_621577	H-probe	0	0	0	0	0	0	0	0	0	0	0	0	0	0	0	0	0	0	0	0	0	0	0		0	0	0	0	0	0	0	0		0			0	0	0	0	0	0	0	0	0	0	0	0
>contig5158|size102|read22|cov7.74_1521580	H-probe	0	0	0	0	0	0	0	0	0	0	0	0	0	0	0	0	0	0	0	0	0	0	0		0	0	0	0	0	0	0	0		0			0	0	0	0	0	0	0	0	0	0	0	0
>contig5161|size64|read18|cov10.08_421588	H-probe	0	0	0	0	0	0	0	0	0	0	0	0	0	0	0	0	0	0	0	0	0	0	0		0	0	0	0	0	0	0	0		0			0	0	0	0	0	0	0	0	0	0	0	0
>contig51733|size62|read10|cov5.65_221623	H-probe	0	0	0	0	0	0	0	0	0	0	0	0	0	0	0	0	0	0	0	0	0	0	0		0	0	0	0	0	0	0	0		0			0	0	0	0	0	0	0	0	0	0	0	0
>contig51937|size60|read9|cov5.18_021681	H-probe	0	0	0	0	0	0	0	0	0	0	0	0	0	0	0	0	0	0	0	0	0	0	0		0	0	0	0	0	0	0	0		0			0	0	0	0	0	0	0	0	0	0	0	0
>contig52307|size79|read22|cov9.49_521790	H-probe	0	0	0	0	0	0	0	0	0	0	0	0	0	0	0	0	0	0	0	0	0	0	0		0	0	0	0	0	0	0	0		0			0	0	0	0	0	0	0	0	0	0	0	0
>contig5254|size77|read13|cov6.06_1321841	H-probe	0	0	0	0	0	0	0	0	0	0	0	0	0	0	0	0	0	0	0	0	0	0	0		0	0	0	0	0	0	0	0		0			0	0	0	0	0	0	0	0	0	0	0	0
>contig527|size100|read36|cov11.01_3321921	H-probe	0	1.027	-1.20513	-1.75057	-2.78983	-1.38424	-1.15518	-0.91049	-0.860191	-0.564273	-1.64365	-1.01498	0	-1.73369	-0.135695	-1.75057	-2.78983	-3.70675	0.423221	-0.91049	-0.860191	-0.564273	-1.64365		0	-0.528662	-0.531614	-1.75057	-2.06444	-2.37183	-1.15518	-0.211776		1.12177			0	-0.125101	-1.20513	-1.75057	-2.78983	-2.88406	0.124868	0.633024	0.385242	-0.564273	-1.64365	-1.01498
>contig52785|size77|read15|cov6.75_1721916	H-probe	0	0	0	0	0	0	0	0	0	0	0	0	0	0	0	0	0	0	0	0	0	0	0		0	0	0	0	0	0	0	0		0			0	0	0	0	0	0	0	0	0	0	0	0
>contig5313|size62|read21|cov11.44_222007	H-probe	0	0	0	0	0	0	0	0	0	0	0	0	0	0	0	0	0	0	0	0	0	0	0		0	0	0	0	0	0	0	0		0			0	0	0	0	0	0	0	0	0	0	0	0
>contig53464|size130|read31|cov8.45_6322091	H-probe	0	0	0	0	0	0	0	0	0	0	0	0	0	0	0	0	0	0	0	0	0	0	0		0	0	0	0	0	0	0	0		0			0	0	0	0	0	0	0	0	0	0	0	0
>contig53654|size68|read15|cov6.24_822144	H-probe	0	0	0	0	0	0	0	0	0	0	0	0	0	0	0	0	0	0	0	0	0	0	0		0	0	0	0	0	0	0	0		0			0	0	0	0	0	0	0	0	0	0	0	0
>contig53735|size87|read16|cov6.21_2722164	H-probe	-1.20788	0.898236	-1.56225	0.545236	-4.23766	-1.46378	-0.693353	-0.277374	-0.285184	-4.38077	0.219248	-1.43342	-0.84543	-1.08935	-3.61248	-0.690331	-1.7026	-2.53119	0.206823	0.28347	0.381847	-2.52684	-3.32198		0.962608	1.11842	0.203321	1.66303	-0.61903	-1.75131	0.789843	1.59212		1.12241			-0.0724505	0.311394	-1.21789	-0.138312	-2.21111	-2.48839	-0.478858	2.41762	1.27089	-0.60664	-1.87747	-0.86649
>contig5412|size152|read33|cov7.62_1122255	H-probe	0	0	0	0	0	0	0	0	0	0	0	0	0	0	0	0	0	0	0	0	0	0	0		0	0	0	0	0	0	0	0		0			0	0	0	0	0	0	0	0	0	0	0	0
>contig5443|size137|read42|cov10.81_1422347	H-probe	0	0	0	0	0	0	0	0	0	0	0	0	0	0	0	0	0	0	0	0	0	0	0		0	0	0	0	0	0	0	0		0			0	0	0	0	0	0	0	0	0	0	0	0
>contig5452|size60|read15|cov8.78_022366	H-probe	0	0	0	0	0	0	0	0	0	0	0	0	0	0	0	0	0	0	0	0	0	0	0		0	0	0	0	0	0	0	0		0			0	0	0	0	0	0	0	0	0	0	0	0
>contig55230|size80|read16|cov7.10_1922544	H-probe	0	0	0	0	0	0	0	0	0	0	0	0	0	0	0	0	0	0	0	0	0	0	0		0	0	0	0	0	0	0	0		0			0	0	0	0	0	0	0	0	0	0	0	0
>contig55436|size96|read29|cov10.76_3622606	H-probe	0	0	0	0	0	0	0	0	0	0	0	0	0	0	0	0	0	0	0	0	0	0	0		0	0	0	0	0	0	0	0		0			0	0	0	0	0	0	0	0	0	0	0	0
>contig5571|size174|read87|cov17.87_3322684	H-probe	0	0	0	0	0	0	0	0	0	0	0	0	0	0	0	0	0	0	0	0	0	0	0		0	0	0	0	0	0	0	0		0			0	0	0	0	0	0	0	0	0	0	0	0
>contig5597|size60|read15|cov8.60_022757	H-probe	0	0	0	0	0	0	0	0	0	0	0	0	0	0	0	0	0	0	0	0	0	0	0		0	0	0	0	0	0	0	0		0			0	0	0	0	0	0	0	0	0	0	0	0
>contig56004|size60|read10|cov5.98_022765	H-probe	0	0	0	0	0	0	0	0	0	0	0	0	0	0	0	0	0	0	0	0	0	0	0		0	0	0	0	0	0	0	0		0			0	0	0	0	0	0	0	0	0	0	0	0
>contig56049|size94|read16|cov5.73_1322780	H-probe	-0.72698	0.387178	-1.27857	-0.593321	-0.700912	0.251809	-0.884706	-1.62636	-0.584423	-2.54345	1.08175	-3.73158	0.717096	-0.651453	-0.377098	-1.61628	0.976068	0.667664	-1.32779	-0.38566	-0.313	-1.73365	-2.45948		1.41689	0.880384	0.698052	0.386209	1.78941	1.43841	1.00155	0.860545		-0.130794			0.190153	-0.719082	-1.4803	-0.391581	0.857978	-0.553052	0.935772	-0.12275	-0.0282677	-1.94902	-0.618487	-2.17603
>contig5611|size79|read33|cov13.72_022799	H-probe	0	0	0	0	0	0	0	0	0	0	0	0	0	0	0	0	0	0	0	0	0	0	0		0	0	0	0	0	0	0	0		0			0	0	0	0	0	0	0	0	0	0	0	0
>contig5618|size88|read19|cov7.41_1922813	H-probe	0	0	0	0	0	0	0	0	0	0	0	0	0	0	0	0	0	0	0	0	0	0	0		0	0	0	0	0	0	0	0		0			0	0	0	0	0	0	0	0	0	0	0	0
>contig56181|size61|read10|cov5.64_022812	H-probe	0	0	0	0	0	0	0	0	0	0	0	0	0	0	0	0	0	0	0	0	0	0	0		0	0	0	0	0	0	0	0		0			0	0	0	0	0	0	0	0	0	0	0	0
>contig56265|size67|read10|cov5.27_022833	H-probe	0	0	0	0	0	0	0	0	0	0	0	0	0	0	0	0	0	0	0	0	0	0	0		0	0	0	0	0	0	0	0		0			0	0	0	0	0	0	0	0	0	0	0	0
>contig5648|size144|read62|cov14.85_5322880	H-probe	0	0	0	0	0	0	0	0	0	0	0	0	0	0	0	0	0	0	0	0	0	0	0		0	0	0	0	0	0	0	0		0			0	0	0	0	0	0	0	0	0	0	0	0
>contig5655|size230|read71|cov10.80_3222894	H-probe	0	0	0	0	0	0	0	0	0	0	0	0	0	0	0	0	0	0	0	0	0	0	0		0	0	0	0	0	0	0	0		0			0	0	0	0	0	0	0	0	0	0	0	0
>contig568|size85|read35|cov13.79_1022981	H-probe	0	0	0	0	0	0	0	0	0	0	0	0	0	0	0	0	0	0	0	0	0	0	0		0	0	0	0	0	0	0	0		0			0	0	0	0	0	0	0	0	0	0	0	0
>contig56881|size95|read17|cov6.18_3022974	H-probe	0	0	0	0	0	0	0	0	0	0	0	0	0	0	0	0	0	0	0	0	0	0	0		0	0	0	0	0	0	0	0		0			0	0	0	0	0	0	0	0	0	0	0	0
>contig57756|size73|read14|cov6.30_223179	H-probe	0	0	0	0	0	0	0	0	0	0	0	0	0	0	0	0	0	0	0	0	0	0	0		0	0	0	0	0	0	0	0		0			0	0	0	0	0	0	0	0	0	0	0	0
>contig57840|size61|read14|cov7.75_123198	H-probe	0	0	0	0	0	0	0	0	0	0	0	0	0	0	0	0	0	0	0	0	0	0	0		0	0	0	0	0	0	0	0		0			0	0	0	0	0	0	0	0	0	0	0	0
>contig5823|size233|read82|cov12.28_27334	H-probe	0	0	0	0	0	0	0	0	0	0	0	0	0	0	0	0	0	0	0	0	0	0	0		0	0	0	0	0	0	0	0		0			0	0	0	0	0	0	0	0	0	0	0	0
>contig5823|size233|read82|cov12.28_3423284	H-probe	0	0	0	0	0	0	0	0	0	0	0	0	0	0	0	0	0	0	0	0	0	0	0		0	0	0	0	0	0	0	0		0			0	0	0	0	0	0	0	0	0	0	0	0
>contig5823|size233|read82|cov12.28_34333	H-probe	0	0	0	0	0	0	0	0	0	0	0	0	0	0	0	0	0	0	0	0	0	0	0		0	0	0	0	0	0	0	0		0			0	0	0	0	0	0	0	0	0	0	0	0
>contig58795|size60|read14|cov8.08_023428	H-probe	0	0	0	0	0	0	0	0	0	0	0	0	0	0	0	0	0	0	0	0	0	0	0		0	0	0	0	0	0	0	0		0			0	0	0	0	0	0	0	0	0	0	0	0
>contig59388|size91|read17|cov6.57_1423576	H-probe	-1.33857	-0.555822	-0.948562	0.0114329	0	0	0	0	-0.361446	-0.391157	0	-0.894544	0.292132	0.226864	-0.948562	0.0265786	0.785761	0	0	0	-0.361446	-0.391157	0		-0.305321	-0.555822	0.529048	0.860043	1.56562	0	1.70235	0		-0.391157			-1.33857	-0.555822	-0.948562	-0.777163	0	0	0	0.395779	-0.361446	-0.391157	0	-0.894544
>contig59647|size60|read10|cov5.72_023628	H-probe	0	0	0	0	0	0	0	0	0	0	0	0	0	0	0	0	0	0	0	0	0	0	0		0	0	0	0	0	0	0	0		0			0	0	0	0	0	0	0	0	0	0	0	0
>contig59720|size81|read16|cov6.80_1923650	H-probe	0	0	0	0	0	0	0	0	0	0	0	0	0	0	0	0	0	0	0	0	0	0	0		0	0	0	0	0	0	0	0		0			0	0	0	0	0	0	0	0	0	0	0	0
>contig5994|size93|read23|cov8.87_423705	H-probe	0	0	0	0	0	0	0	0	0	0	0	0	0	0	0	0	0	0	0	0	0	0	0		0	0	0	0	0	0	0	0		0			0	0	0	0	0	0	0	0	0	0	0	0
>contig59972|size74|read15|cov7.27_023708	H-probe	0	0	0	0	0	0	0	0	0	0	0	0	0	0	0	0	0	0	0	0	0	0	0		0	0	0	0	0	0	0	0		0			0	0	0	0	0	0	0	0	0	0	0	0
>contig6044|size61|read30|cov17.62_023812	H-probe	0	0	0	0	0	0	0	0	0	0	0	0	0	0	0	0	0	0	0	0	0	0	0		0	0	0	0	0	0	0	0		0			0	0	0	0	0	0	0	0	0	0	0	0
>contig606|size60|read16|cov9.58_023861	H-probe	0	0	0	0	0	0	0	0	0	0	0	0	0	0	0	0	0	0	0	0	0	0	0		0	0	0	0	0	0	0	0		0			0	0	0	0	0	0	0	0	0	0	0	0
>contig6112|size61|read22|cov12.03_123947	H-probe	0	0	0	0	0	0	0	0	0	0	0	0	0	0	0	0	0	0	0	0	0	0	0		0	0	0	0	0	0	0	0		0			0	0	0	0	0	0	0	0	0	0	0	0
>contig61472|size77|read12|cov5.52_424017	H-probe	0	0	0	0	0	0	0	0	0	0	0	0	0	0	0	0	0	0	0	0	0	0	0		0	0	0	0	0	0	0	0		0			0	0	0	0	0	0	0	0	0	0	0	0
>contig6170|size65|read10|cov5.52_024059	H-probe	0	0	0	0	0	0	0	0	0	0	0	0	0	0	0	0	0	0	0	0	0	0	0		0	0	0	0	0	0	0	0		0			0	0	0	0	0	0	0	0	0	0	0	0
>contig61771|size89|read22|cov8.84_724070	H-probe	0	0	0	0	0	0	0	0	0	0	0	0	0	0	0	0	0	0	0	0	0	0	0		0	0	0	0	0	0	0	0		0			0	0	0	0	0	0	0	0	0	0	0	0
>contig61995|size92|read21|cov7.97_224115	H-probe	0	0	0	0	0	0	0	0	0	0	0	0	0	0	0	0	0	0	0	0	0	0	0		0	0	0	0	0	0	0	0		0			0	0	0	0	0	0	0	0	0	0	0	0
>contig6239|size100|read26|cov9.12_224211	H-probe	0	0	0	0	-0.883673	0	0	0	0	0	0	0	0	0	0	0	-0.883673	0	0	0	0	0	0		1.03325	0.724835	0	0	-0.883673	0	0	0		1.07647			0	0.75119	0	0	-0.883673	0	0	0.395779	0	0	0	0
>contig62538|size83|read15|cov6.27_2324238	H-probe	-7.37619	-3.32781	-3.12366	-3.24421	-7.61775	-4.19602	-1.82043	-6.21451	-0.339783	-7.45182	-2.19011	-7.40847	-5.74549	-5.8933	-3.87192	-7.70982	-6.39712	-6.82531	0.591321	-2.44917	-1.18099	-5.15251	1.4206		-0.16115	-2.0209	-2.59388	-3.66735	-4.33201	-5.1472	-2.45596	-4.64185		-0.433579			-3.83922	-3.77302	-4.97028	-4.82008	-7.436	-8.2866	-2.66641	-0.918199	0.0932717	-2.79043	-2.19011	-4.3788
>contig62902|size120|read19|cov5.67_4524336	H-probe	0	-0.304515	0	0.788596	0	-1.77036	0	0	-0.253327	-0.84003	0	0	1.03444	-0.304515	1.06944	0	0	-1.77036	0	0	-0.253327	-0.84003	0		0	1.78754	1.47761	1.26729	0	-1.77036	0	1.16743		-0.84003			0	-0.304515	0	0	0	-0.947668	0	0.395779	-0.253327	-0.84003	0	0
>contig63045|size74|read11|cov5.23_1324367	H-probe	0	0	0	0	0	0	0	0	0	0	0	0	0	0	0	0	0	0	0	0	0	0	0		0	0	0	0	0	0	0	0		0			0	0	0	0	0	0	0	0	0	0	0	0
>contig6305|size73|read16|cov7.49_924371	H-probe	0	0	0	0	0	0	0	0	0	0	0	0	0	0	0	0	0	0	0	0	0	0	0		0	0	0	0	0	0	0	0		0			0	0	0	0	0	0	0	0	0	0	0	0
>contig63295|size63|read10|cov5.57_324412	H-probe	0	0	0	0	0	0	0	0	0	0	0	0	0	0	0	0	0	0	0	0	0	0	0		0	0	0	0	0	0	0	0		0			0	0	0	0	0	0	0	0	0	0	0	0
>contig63424|size66|read14|cov7.38_424435	H-probe	0	0	0	0.788596	-1.42768	0	-0.321848	0	0	0	0	-0.422548	0	0	0	0	-1.42768	0	0.673232	0	0	0	3.61071		0	0.724835	0.673517	0	-1.42768	1.33492	-0.321848	0		0			0	0	0	0	-1.42768	0	-0.321848	0	0.753132	0	0	-0.422548
>contig6382|size229|read74|cov11.42_2424519	H-probe	0	0	0	0	0	0	0	0	0	0	0	0	0	0	0	0	0	0	0	0	0	0	0		0	0	0	0	0	0	0	0		0			0	0	0	0	0	0	0	0	0	0	0	0
>contig642|size78|read25|cov11.18_924629	H-probe	0	0	0	0	0	0	0	0	0	0	0	0	0	0	0	0	0	0	0	0	0	0	0		0	0	0	0	0	0	0	0		0			0	0	0	0	0	0	0	0	0	0	0	0
>contig64646|size62|read9|cov5.18_024689	H-probe	0	0	0	0	0	0	0	0	0	0	0	0	0	0	0	0	0	0	0	0	0	0	0		0	0	0	0	0	0	0	0		0			0	0	0	0	0	0	0	0	0	0	0	0
>contig6515|size76|read17|cov7.34_624802	H-probe	0	-0.275907	0	0	0	0	0	0	0	0	0	0	0	-0.275907	0	0	0	0	0	0	0	0	0		0	-0.275907	0	0	0	0	0	0		0			0	-0.275907	0	0	0	0	0	0	0	0	0	0
>contig6576|size64|read22|cov11.28_424916	H-probe	0	0	0	0	0	0	0	0	0	0	0	0	0	0	0	0	0	0	0	0	0	0	0		0	0	0	0	0	0	0	0		0			0	0	0	0	0	0	0	0	0	0	0	0
>contig6581|size147|read48|cov11.30_4324925	H-probe	0	-0.304515	0	0	-0.883673	0	0	0	0	-0.736268	0	0	0	-0.304515	0	0	-0.883673	0	0	0	0	-0.736268	0		0	-0.304515	0	0	-0.883673	0	0	0		-0.736268			0	-0.304515	0	0	-0.883673	0	0	0	0	-0.736268	0	0
>contig6637|size88|read22|cov8.57_2125032	H-probe	0	0	0	0	0	0	0	0	0	0	0	0	0	0	0	0	0	0	0	0	0	0	0		0	0	0	0	0	0	0	0		0			0	0	0	0	0	0	0	0	0	0	0	0
>contig6681|size92|read34|cov12.73_325109	H-probe	0	0	0	0	0	0	0	0	0	0	0	0	0	0	0	0	0	0	0	0	0	0	0		0	0	0	0	0	0	0	0		0			0	0	0	0	0	0	0	0	0	0	0	0
>contig6690|size111|read41|cov12.89_3525120	H-probe	0	0	0	0	0	0	0	0	0	0	0	0	0	0	0	0	0	0	0	0	0	0	0		0	0	0	0	0	0	0	0		0			0	0	0	0	0	0	0	0	0	0	0	0
>contig670|size69|read14|cov7.29_925155	H-probe	-2.02077	-1.43737	-1.86476	-2.86077	-5.52178	-4.19044	-1.39083	-3.65027	1.41558	-2.58011	0	-4.39875	-0.986331	-4.81421	-2.16768	-1.95476	-4.84154	-6.12349	0.54347	-1.08047	-0.267987	-2.58011	0		1.03692	-1.3825	-1.75951	-2.38207	-3.55659	-4.97404	-1.83237	-3.65027		0.551167			-2.02077	-2.6715	-1.84107	-2.87336	-6.80353	-6.97722	-2.25467	-0.589444	0.453906	-0.51995	0	-2.11219
>contig6700|size71|read21|cov10.28_825138	H-probe	0	0	0	0	0	0	0	0	0	0	0	0	0	0	0	0	0	0	0	0	0	0	0		0	0	0	0	0	0	0	0		0			0	0	0	0	0	0	0	0	0	0	0	0
>contig6791|size105|read58|cov18.61_4525308	H-probe	0	-1.10485	-0.992412	0	-1.82179	-1.77036	-1.1697	0	0.191347	-0.30955	0	-0.422548	0	-1.10485	-0.992412	0	-1.82179	-1.77036	0.408695	0	-1.00521	-0.30955	0		1.03325	-0.380016	-0.992412	0	-1.0964	-1.77036	-1.1697	0		0.76692			0	-1.10485	-0.992412	0	-1.82179	-1.77036	-1.1697	0.395779	-1.00521	-0.30955	0	-0.422548
>contig67947|size79|read13|cov5.90_1325313	H-probe	0	0	0	0	0	0	0	0	0	0	0	0	0	0	0	0	0	0	0	0	0	0	0		0	0	0	0	0	0	0	0		0			0	0	0	0	0	0	0	0	0	0	0	0
>contig6802|size69|read14|cov7.23_925333	H-probe	0	0	0	0	0	0	0	0	0	0	0	0	0	0	0	0	0	0	0	0	0	0	0		0	0	0	0	0	0	0	0		0			0	0	0	0	0	0	0	0	0	0	0	0
>contig68293|size62|read10|cov5.50_225366	H-probe	0	0	0	0	0	0	0	0	0	0	0	0	0	0	0	0	0	0	0	0	0	0	0		0	0.724835	0	0	0	0	0	0		0			0	0	0	0	0	0	0	0	0	0	0	0
>contig6864|size66|read19|cov9.70_025428	H-probe	0	0	0	0	0	0	0	0	0	0	0	0	0	0	0	0	0	0	0	0	0	0	0		0	0	0	0	0	0	0	0		0			0	0	0	0	0	0	0	0	0	0	0	0
>contig68769|size70|read11|cov5.50_525449	H-probe	0	0	0.613195	0	0	-1.77036	-0.321848	0	-0.361446	-0.632981	0	0	2.05135	0	0.631622	0	0	-0.701223	-0.321848	0	0.621869	-0.632981	0		0	1.20503	0.673517	1.26729	0.72539	-1.77036	-0.321848	1.16743		-0.632981			0	0.75119	0	0	0	-1.77036	-0.321848	0.395779	-0.361446	-0.632981	0	0
>contig6880|size76|read16|cov7.49_025457	H-probe	0	-0.275907	-0.903337	0	-0.883673	0.84832	0	0	-0.253327	0	0	0	1.03444	-0.275907	0.501521	0	-0.0979114	1.06914	0.99508	0	-0.253327	1.20628	0		0	0.448929	-0.22982	0.768538	-0.883673	0	0	0.698714		0			0	-0.275907	-0.276726	0	-0.883673	0	0	0	-0.253327	0	0	0
>contig69039|size80|read14|cov6.03_1425484	H-probe	0	0	0	0	0	0	0	0	0	0	0	0	0	0	0	0	0	0	0	0	0	0	0		0	0	0	0	0	0	0	0		0			0	0	0	0	0	0	0	0	0	0	0	0
>contig6966|size75|read22|cov10.44_125579	H-probe	0	0	0	0	0	0	0	0	0	0	0	0	0	0	0	0	0	0	0	0	0	0	0		0	0	0	0	0	0	0	0		0			0	0	0	0	0	0	0	0	0	0	0	0
>contig69885|size69|read16|cov8.00_525611	H-probe	0	0	0	0	0	0	0	0	0	0	0	0	0	0	0	0	0	0	0	0	0	0	0		0	0	0	0	0	0	0	0		0			0	0	0	0	0	0	0	0	0	0	0	0
>contig70439|size70|read12|cov5.96_925695	H-probe	0	0	0	0	0	0	0	0	0	0	0	0	0	0	0	0	0	0	0	0	0	0	0		0	0	0	0	0	0	0	0		0			0	0	0	0	0	0	0	0	0	0	0	0
>contig7100|size89|read31|cov11.89_2425782	H-probe	0	0	0	0	0	0	0	0	0	0	0	0	0	0	0	0	0	0	0	0	0	0	0		0	0	0	0	0	0	0	0		0			0	0	0	0	0	0	0	0	0	0	0	0
>contig7105|size72|read27|cov13.33_625789	H-probe	0	0	0	0	0	0	0	0	0	0	0	0	0	0	0	0	0	0	0	0	0	0	0		0	0	0	0	0	0	0	0		0			0	0	0	0	0	0	0	0	0	0	0	0
>contig71601|size69|read11|cov5.70_625878	H-probe	-1.29914	-0.864045	-1.67001	-0.896215	-1.82179	0.84832	0	0.81248	0	0	0	0	-2.22276	-2.34681	-0.739525	-2.19181	-0.530186	0	0	0.990922	0	1.20628	0		-4.27411	-3.08958	-2.18003	-2.19181	-1.82179	0	0	0		0			-1.19941	-1.97257	-1.0456	-0.54237	-1.08755	0.822693	1.28005	0.395779	0	0	0	0
>contig72083|size62|read10|cov5.69_025949	H-probe	0	0	0	0	0	0	0	0	0	0	0	0	0	0	0	0	0	0	0	0	0	0	0		0	0	0	0	0	0	0	0		0			0	0	0	0	0	0	0	0	0	0	0	0
>contig7263|size229|read62|cov9.63_12626018	H-probe	0	0	0	0	0	0	0	0	0	0	0	0	0	0	0	0	0	0	0	0	0	0	0		0	0	0	0	0	0	0	0		0			0	0	0	0	0	0	0	0	0	0	0	0
>contig72947|size76|read12|cov5.63_626060	H-probe	1.44127	0.784212	0.0332866	0	0	0.84832	0	0	-0.253327	0	0	0	0	0	-0.579908	0.803741	0	0	0	0	-0.253327	0	0		0	1.85234	1.17704	0	0	0	0	0.698714		0			0	0.75119	-0.579908	0.775997	0	0	0	0	-0.253327	0	0	0
>contig73194|size62|read16|cov9.18_126079	H-probe	0	0	0	0	0	0	0	0	0	0	0	0	0	0	0	0	0	0	0	0	0	0	0		0	0	0	0	0	0	0	0		0			0	0	0	0	0	0	0	0	0	0	0	0
>contig7342|size63|read11|cov5.81_026110	H-probe	0	0	0	0	0	0	0	0	0	0	0	0	0	0	0	0	0	0	0	0	0	0	0		0	0	0	0	0	0	0	0		0			0	0	0	0	0	0	0	0	0	0	0	0
>contig7389|size67|read10|cov5.24_726173	H-probe	0	0	-0.521246	0	-0.883673	0	1.43816	0	0	0	0	0	0	0	-0.521246	0	-0.883673	0	0	0	0	0	0		0	0.724835	0.152271	0	-0.883673	0	0	0		0			0	0.75119	-0.521246	0	-0.883673	0	0	0	0	0	0	0
>contig770|size82|read25|cov10.68_326545	H-probe	0	0	0	0	0	0	0	0	0	0	0	0	0	0	0	0	0	0	0	0	0	0	0		0	0	0	0	0	0	0	0		0			0	0	0	0	0	0	0	0	0	0	0	0
>contig7818|size194|read67|cov12.06_11126665	H-probe	0	0	0	0	0	0	0	0	0	0	0	0	0	0	0	0	0	0	0	0	0	0	0		0	0	0	0	0	0	0	0		0			0	0	0	0	0	0	0	0	0	0	0	0
>contig7829|size107|read31|cov9.92_326678	H-probe	0	0	0	0	0	0	0	0	0	0	0	0	0	0	0	0	0	0	0	0	0	0	0		0	0	0	0	0	0	0	0		0			0	0	0	0	0	0	0	0	0	0	0	0
>contig7838|size137|read27|cov7.08_4626687	H-probe	0	0	0	0	0	0	0	0	0	0	0	0	0	0	0	0	0	0	0	0	0	0	0		0	0	0	0	0	0	0	0		0			0	0	0	0	0	0	0	0	0	0	0	0
>contig7899|size75|read31|cov14.41_126750	H-probe	0	0	0	0	-0.883673	0	0	0	0	0	0	0	0	0	0	0	-0.883673	0	0	0	0	0	0		1.03325	0	0	0	-0.883673	0	0	0		0			0	0	0	0	-0.883673	0	0	0	0	0	0	0
>contig792|size85|read34|cov14.36_1426780	H-probe	0	0	0	0	0	0	0	0	0	0	0	0	0	0	0	0	0	0	0	0	0	0	0		0	0	0	0	0	0	0	0		0			0	0	0	0	0	0	0	0	0	0	0	0
>contig79574|size88|read14|cov5.59_426803	H-probe	0	0	0	0	0	0	0	0	0	0	0	0	0	0	0	0	0	0	0	0	0	0	0		0	0	0	0	0	0	0	0		0			0	0	0	0	0	0	0	0	0	0	0	0
>contig79824|size61|read13|cov7.16_026833	H-probe	0	0	0	0	0	0	0	0	0	0	0	0	0	0	0	0	0	0	0	0	0	0	0		0	0	0	0	0	0	0	0		0			0	0	0	0	0	0	0	0	0	0	0	0
>contig8099|size118|read49|cov13.97_4026963	H-probe	0	0	0	0	0	0	0	0	0	0	0	0	0	0	0	0	0	0	0	0	0	0	0		0	0	0	0	0	0	0	0		0			0	0	0	0	0	0	0	0	0	0	0	0
>contig81217|size71|read14|cov6.87_626981	H-probe	0	0	0	0	0	0	0	0	0	0	0	0	0	0	0	0	0	0	0	0	0	0	0		0	0	0	0	0	0	0	0		0			0	0	0	0	0	0	0	0	0	0	0	0
>contig8124|size73|read12|cov5.64_1226985	H-probe	0	0	0	0	0	0	0	0	0	0	0	0	0	0	0	0	0	0	0	0	0	0	0		0	0	0	0	0	0	0	0		0			0	0	0	0	0	0	0	0	0	0	0	0
>contig8127|size79|read18|cov7.68_1426988	H-probe	0	0	0	0	0	0	0	0	0	0	0	0	0	0	0	0	0	0	0	0	0	0	0		0	0	0	0	0	0	0	0		0			0	0	0	0	0	0	0	0	0	0	0	0
>contig816|size72|read39|cov17.65_1227024	H-probe	-2.02077	-2.45551	0	-0.713002	-2.38552	-1.77036	-0.511486	0	-0.965937	0	0	-2.60985	-2.02077	-2.45551	0	-0.713002	-2.38552	-1.77036	-0.511486	0	-0.965937	0	0		-2.02077	-2.45551	0	-0.713002	-2.38552	-1.77036	-0.511486	0		0			-2.02077	-2.45551	0	-0.713002	-2.38552	-1.77036	-0.511486	0	-0.965937	0	0	-2.60985
>contig8171|size74|read22|cov10.58_1327025	H-probe	1.44127	0.508306	0.613195	-0.713002	-0.648905	0.84832	1.88311	0	-0.361446	0	0	-0.602865	1.03444	0.50678	0.631622	-0.713002	-0.641916	0	-0.260777	0.990922	1.20123	0	0		1.03325	0.448929	1.47761	0.554285	0.665456	1.33492	-0.260777	0.698714		0			0	-0.275907	0	-0.713002	-0.693431	0	-0.260777	0.742903	-0.361446	0	0.895964	-0.602865
>contig8216|size69|read40|cov20.04_727064	H-probe	-1.33857	-0.555822	-0.579908	0	-1.42768	-1.77036	-0.295598	0	-0.253327	0	0	-0.422548	-1.33857	-0.555822	-0.579908	0	-1.42768	-1.77036	-0.295598	0	-0.253327	0	0		-1.33857	-0.555822	-0.579908	0	-1.42768	-1.77036	-0.295598	0		1.07647			-1.33857	-0.555822	-0.579908	0	-1.42768	-1.77036	-0.295598	0	-0.253327	0	0	-0.422548
>contig8353|size235|read111|cov16.76_19433	H-probe	0	0	0	0	0	0	0	0	0	0	0	0	0	0	0	0	0	0	0	0	0	0	0		0	0	0	0	0	0	0	0		0			0	0	0	0	0	0	0	0	0	0	0	0
>contig8353|size235|read111|cov16.76_4727197	H-probe	0	0	0	0	0	0	0	0	0	0	0	0	0	0	0	0	0	0	0	0	0	0	0		0	0	0	0	0	0	0	0		0			0	0	0	0	0	0	0	0	0	0	0	0
>contig8353|size235|read111|cov16.76_47431	H-probe	0	0	0	0	0	0	0	0	0	0	0	0	0	0	0	0	0	0	0	0	0	0	0		0	0	0	0	0	0	0	0		0			0	0	0	0	0	0	0	0	0	0	0	0
>contig8361|size117|read25|cov7.61_3427205	H-probe	0	0	0	0	0	0	0	0	0	0	0	0	0	0	0	0	0	0	0	0	0	0	0		0	0	0	0	0	0	0	0		0			0	0	0	0	0	0	0	0	0	0	0	0
>contig8459|size136|read45|cov11.24_4627289	H-probe	0	0	0	0	0	0	0	0	0	0	0	0	0	0	0	0	0	0	0	0	0	0	0		0	0	0	0	0	0	0	0		0			0	0	0	0	0	0	0	0	0	0	0	0
>contig8489|size76|read20|cov9.42_527314	H-probe	0	0	0	0	0	0	0	0	0	0	0	0	0	0	0	0	0	0	0	0	0	0	0		0	0	0	0	0	0	0	0		0			0	0	0	0	0	0	0	0	0	0	0	0
>contig8555|size85|read21|cov8.45_1927370	H-probe	0	0	0	0	0	0	0	0	0	0	0	0	0	0	0	0	0	0	0	0	0	0	0		0	0	0	0	0	0	0	0		0			0	0	0	0	0	0	0	0	0	0	0	0
>contig8577|size75|read14|cov6.69_227381	H-probe	0.23623	0.502787	0.0604683	0.886773	-2.26845	-0.455939	0.176127	-0.246846	-0.505192	-1.73485	-2.10848	-1.57123	0.361451	-0.29172	-0.792938	1.24958	-0.654536	-1.68281	0.535772	0.0308055	1.36156	-1.24785	-2.10848		2.11384	2.48777	1.63858	2.85078	1.71907	0.152578	1.87475	3.56361		1.68488			0.675405	0.394435	-0.26203	1.05476	-0.709564	-1.00072	-0.180362	2.69984	0.607562	-1.51672	-0.267491	-1.24006
>contig8743|size75|read29|cov13.01_027531	H-probe	0	0	0	0	0	0	0	0	0	0	0	0	0	0	0	0	0	0	0	0	0	0	0		0	0	0	0	0	0	0	0		0			0	0	0	0	0	0	0	0	0	0	0	0
>contig879|size101|read40|cov14.14_2127576	H-probe	0	0	0	0	0	0	0	0	0	0	0	0	0	0	0	0	0	0	0	0	0	0	0		0	0	0	0	0	0	0	0		0			0	0	0	0	0	0	0	0	0	0	0	0
>contig8845|size65|read14|cov7.72_027618	H-probe	0	0	0	0	0	0	0	0	0	0	0	0	0	0	0	0	0	0	0	0	0	0	0		0	0	0	0	0	0	0	0		0			0	0	0	0	0	0	0	0	0	0	0	0
>contig890|size85|read24|cov9.87_527677	H-probe	0	0	0	0	0	0	0	0	0	0	0	0	0	0	0	0	0	0	0	0	0	0	0		0	0	0	0	0	0	0	0		0			0	0	0	0	0	0	0	0	0	0	0	0
>contig8979|size75|read15|cov6.99_1027731	H-probe	0	0	0	0	0	0	0	0	0	0	0	0	0	0	0	0	0	0	0	0	0	0	0		0	0	0	0	0	0	0	0		0			0	0	0	0	0	0	0	0	0	0	0	0
>contig9081|size67|read16|cov8.13_727812	H-probe	0	0	0	0	0	0	0	0	0	0	0	0	0	0	0	0	0	0	0	0	0	0	0		0	0	0	0	0	0	0	0		0			0	0	0	0	0	0	0	0	0	0	0	0
>contig911|size95|read38|cov13.85_727844	H-probe	0	0	0	0	0	0	0	0	0	0	0	0	0	0	0	0	0	0	0	0	0	0	0		0	0	0	0	0	0	0	0		0			0	0	0	0	0	0	0	0	0	0	0	0
>contig9113|size79|read33|cov14.22_1927837	H-probe	0	0	0	0	0	0	0	0	0	0	0	0	0	0	0	0	0	0	0	0	0	0	0		0	0	0	0	0	0	0	0		0			0	0	0	0	0	0	0	0	0	0	0	0
>contig9249|size60|read16|cov9.57_027951	H-probe	0	0	0	0	0	0	0	0	0	0	0	0	0	0	0	0	0	0	0	0	0	0	0		0	0	0	0	0	0	0	0		0			0	0	0	0	0	0	0	0	0	0	0	0
>contig9271|size64|read20|cov11.02_027973	H-probe	0	0	0	0	0	0	0	0	0	0	0	0	0	0	0	0	0	0	0	0	0	0	0		0	0	0	0	0	0	0	0		0			0	0	0	0	0	0	0	0	0	0	0	0
>contig9350|size106|read22|cov7.34_228041	H-probe	2.1477	-0.522764	-0.290142	0	0.778772	0	-0.58483	0	0.727809	-0.391157	0	-0.748964	0	-0.522764	-0.903337	0	0.785761	0	-0.58483	0	0.51457	-0.391157	0		2.04958	1.04192	-0.22982	0	1.20583	0	-0.58483	0.698714		-0.391157			0	-0.522764	0.158693	0	0	0	-0.58483	0.961223	-0.468746	-0.391157	0	-0.748964
>contig9383|size95|read38|cov13.94_3428076	H-probe	0	0	0	0	0	0	0	0	0	0	0	0	0	0	0	0	0	0	0	0	0	0	0		0	0	0	0	0	0	0	0		0			0	0	0	0	0	0	0	0	0	0	0	0
>contig9501|size82|read23|cov9.88_1928163	H-probe	-1.33857	-0.888006	-0.591936	0	-1.42768	-0.922042	0	0	-1.00521	-0.391157	0	0	-1.33857	-0.888006	-0.135695	0	-1.42768	-0.701223	0	0	-1.00521	-0.391157	0		-1.33857	0.317026	-0.531614	1.26729	-0.702288	-1.77036	2.46169	2.04099		0.685313			-1.33857	-0.888006	-0.57852	0.775997	-1.42768	-0.947668	0	0.992183	-0.252075	-0.391157	0.895964	0
>contig9507|size80|read14|cov6.29_1628171	H-probe	0	0	0	0	0	0	0	0	0	0	0	0	0	0	0	0	0	0	0	0	0	0	0		0	0	0	0	0	0	0	0		0			0	0	0	0	0	0	0	0	0	0	0	0
>contig9535|size74|read13|cov6.31_028202	H-probe	0	0	0	0	0	0	0	0	0	0	0	0	0	0	0	0	0	0	0	0	0	0	0		0	0	0	0	0	0	0	0		0			0	0	0	0	0	0	0	0	0	0	0	0
>contig957|size72|read51|cov23.83_1228242	H-probe	-4.88979	-2.32903	-2.92448	-0.955164	-4.03075	-3.9758	-0.897645	-2.43254	-1.93725	-3.42272	0	-6.27286	-5.29662	-3.68281	-2.65981	-3.16834	-4.02376	-6.04675	-0.343192	-2.43254	-0.953932	-3.42272	4.55042		-2.26934	-3.36582	-2.80841	-3.16834	-3.6037	-6.04675	-2.33581	-2.43254		-2.34625			-3.08528	-4.13521	-4.56536	-3.16834	-4.07528	-5.22405	-2.33581	-0.271556	-1.93725	-2.38234	0	-6.27286
>contig9596|size420|read146|cov11.67_35028255	H-probe	0	0	0	0	0	0	0	0	0	0	0	0	0	0	0	0	0	0	0	0	0	0	0		0	0	0	0	0	0	0	0		0			0	0	0	0	0	0	0	0	0	0	0	0
>contig9652|size64|read15|cov8.42_328302	H-probe	0	0	0	0.0114329	-1.82179	-3.70675	0	0	0	0	0	-0.422548	0	0	0	-0.777163	-1.82179	-2.63761	0.99508	0	0	0	0		0	0	0	-0.777163	-1.0964	-3.70675	1.70235	0		1.07647			0	0	0	-0.777163	-1.82179	-3.70675	0	0	0.753132	0	0	-0.422548
>contig9668|size144|read59|cov14.43_2428321	H-probe	0	0	0	0	0	0	0	0	0	0	0	0	0	0	0	0	0	0	0	0	0	0	0		0	0	0	0	0	0	0	0		0			0	0	0	0	0	0	0	0	0	0	0	0
>contig9670|size148|read35|cov8.33_3028325	H-probe	0	0	0	0	0	0	0	0	0	0	0	0	0	0	0	0	0	0	0	0	0	0	0		0	0	0	0	0	0	0	0		0			0	0	0	0	0	0	0	0	0	0	0	0
>contig9696|size70|read21|cov10.71_228350	H-probe	0	0	0	0	0	0	0	0	0	0	0	0	0	0	0	0	0	0	0	0	0	0	0		0	0	0	0	0	0	0	0		0			0	0	0	0	0	0	0	0	0	0	0	0
>contig971|size109|read20|cov6.57_4928369	H-probe	0	0	0	0	0	0	0	0	0	0	0	0	0	0	0	0	0	0	0	0	0	0	0		0	0	0	0	0	0	0	0		0			0	0	0	0	0	0	0	0	0	0	0	0
>contig9717|size66|read17|cov9.20_028367	H-probe	0	0	0	0	0	0	0	0	0	0	0	0	0	0	0	0	0	0	0	0	0	0	0		0	0	0	0	0	0	0	0		0			0	0	0	0	0	0	0	0	0	0	0	0
>contig9763|size79|read22|cov9.27_1628412	H-probe	0	0	0	0	0	0	0	0	0	0	0	0	0	0	0	0	0	0	0	0	0	0	0		0	0	0	0	0	0	0	0		0			0	0	0	0	0	0	0	0	0	0	0	0
>contig9815|size139|read75|cov18.94_2628449	H-probe	0	0	0	0	0	0	0	0	0	0	0	0	0	0	0	0	0	0	0	0	0	0	0		0	0	0	0	0	0	0	0		0			0	0	0	0	0	0	0	0	0	0	0	0
>contig9820|size77|read16|cov7.32_328457	H-probe	0	0	0	0	0	0	0	0	0	0	0	0	0	0	0	0	0	0	0	0	0	0	0		0	0	0	0	0	0	0	0		0			0	0	0	0	0	0	0	0	0	0	0	0
>contig9848|size66|read15|cov7.67_228482	H-probe	-3.11187	-3.54478	-2.59543	-1.69579	-5.93469	-3.70656	-2.05043	-3.35042	-1.81894	-3.60872	0	-5.45539	-3.11187	-5.50404	-2.83146	-2.85905	-5.42186	-4.41696	-0.0381223	-2.17653	-0.689768	-3.60872	0		-2.07862	-1.56296	-2.0442	-3.6628	-3.93103	-5.03517	-1.02691	-3.46418		-0.477448			-3.11187	-3.36133	-3.17429	-3.6628	-5.97922	-7.86105	-3.4886	-0.855228	-1.30636	-3.60872	0	-2.68596
>contig9946|size67|read12|cov5.88_128551	H-probe	-2.48207	-0.304515	-0.948562	-0.777163	-2.13102	-3.95125	-2.24761	-1.52565	-2.4146	-1.3133	0	-0.422548	-1.44764	-0.304515	-0.948562	0.0265786	-2.13102	-2.88211	-0.669214	0.0471935	-2.62784	-1.3133	0		0.15788	1.26017	-0.275045	-0.777163	-0.925191	-2.61633	-0.545262	-0.826939		0.799933			-2.48207	0.446675	-0.948562	-0.777163	-1.39677	-3.12856	-2.24761	0.0178617	-2.85802	-1.3133	0	-0.422548
>contig9956|size69|read14|cov6.70_728562	H-probe	0	0.582549	-0.290142	-0.400107	0	-1.77036	-0.58483	0	0	-0.30955	0	-0.602865	1.03444	-0.706874	-0.271715	0.403635	0	-1.77036	-0.58483	0	0	-0.30955	0		1.62912	1.14546	0.227536	1.77549	1.20583	-1.77036	-0.58483	0		0.76692			1.04316	-0.706874	-0.276726	-0.400107	0	-1.77036	-0.58483	0	0	-0.30955	0	-0.602865
>contig9957|size75|read17|cov8.13_028564	H-probe	0	0	0	0	0	0	0	0	0	0	0	0	0	0	0	0	0	0	0	0	0	0	0		0	0	0	0	0	0	0	0		0			0	0	0	0	0	0	0	0	0	0	0	0
>contig996|size101|read33|cov11.49_4128578	H-probe	0	0	0	0	0	0	0	0	0	0	0	0	0	0	0	0	0	0	0	0	0	0	0		0	0	0	0	0	0	0	0		0			0	0	0	0	0	0	0	0	0	0	0	0
>contig9962|size117|read22|cov6.67_2328570	H-probe	0	0	0	0	0	0	0	0	0	0	0	0	0	0	0	0	0	0	0	0	0	0	0		0	0	0	0	0	0	0	0		0			0	0	0	0	0	0	0	0	0	0	0	0
>contig9970|size337|read138|cov14.25_15528579	H-probe	0	0	0	0	0	0	0	0	0	0	0	0	0	0	0	0	0	0	0	0	0	0	0		0	0	0	0	0	0	0	0		0			0	0	0	0	0	0	0	0	0	0	0	0
>contig998|size593|read289|cov17.21_29128597	H-probe	0	0	0	0	0	0	0	0	0	0	0	0	0	0	0	0	0	0	0	0	0	0	0		0	0	0	0	0	0	0	0		0			0	0	0	0	0	0	0	0	0	0	0	0
>contig998|size593|read289|cov17.21_291471	H-probe	0	0	0	0	0	0	0	0	0	0	0	0	0	0	0	0	0	0	0	0	0	0	0		0	0	0	0	0	0	0	0		0			0	0	0	0	0	0	0	0	0	0	0	0
>contig998|size593|read289|cov17.21_303473	H-probe	0	0	0	0	0	0	0	0	0	0	0	0	0	0	0	0	0	0	0	0	0	0	0		0	0	0	0	0	0	0	0		0			0	0	0	0	0	0	0	0	0	0	0	0
>contig998|size593|read289|cov17.21_310472	H-probe	0	0	0	0	0	0	0	0	0	0	0	0	0	0	0	0	0	0	0	0	0	0	0		0	0	0	0	0	0	0	0		0			0	0	0	0	0	0	0	0	0	0	0	0
>contig9987|size93|read26|cov9.92_2728595	H-probe	0	0	0	0	0	0	0	0	0	0	0	0	0	0	0	0	0	0	0	0	0	0	0		0	0	0	0	0	0	0	0		0			0	0	0	0	0	0	0	0	0	0	0	0
nw>contig10000|size71|read13|cov9.30_01	H-probe	2.36289	-1.52862	-1.1425	-0.950072	1.32193	-0.470767	0.889509	1.06942	-1.39956	-1.65988	-2.10848	-0.663637	2.18288	-0.673912	-1.09813	-2.77332	0.780218	0.382216	-1.02504	-0.0116215	-1.26616	-2.09711	-2.10848		3.53223	1.38425	1.69568	1.4041	4.55116	2.68875	1.64711	3.60592		0.418811			2.1984	-1.10587	-1.53173	-1.22033	1.06922	-1.19835	-0.201424	1.4945	-1.09465	-2.26301	-1.21252	-2.4067
nw>contig10002|size116|read26|cov11.18_52	H-probe	-2.02077	0.0599149	-2.0061	-0.181387	-0.104901	0.84832	1.3367	0	0.305805	0.0605911	0	-1.01498	-0.390069	0.0577641	-0.713739	-0.969983	0.407933	1.67643	0.771215	0	-0.890749	0.222741	0		-0.391647	1.55173	-0.628419	1.9042	1.59489	2.47711	1.65451	2.58122		0.702511			-0.977609	0.379084	-2.61929	0.679458	-0.883673	0	-0.807184	0	-0.137617	0.0568464	0	-1.01498
nw>contig10004|size101|read23|cov10.62_363	H-probe	-1.20568	0.868695	-1.32985	0.28007	-4.37008	-3.04438	-1.32864	-3.27406	-1.24188	-6.64119	1.14109	-6.35211	-1.99614	-1.29218	-1.57603	-1.08553	-3.11849	-3.89578	-0.701219	-1.45125	-1.22003	-1.67369	2.51817		2.45563	2.10606	0.986444	1.4949	-1.81895	-3.27575	-0.875561	-1.02459		0.875345			-1.05368	-0.581999	-1.88252	-1.67879	-4.27644	-4.17243	-2.44003	0.00563338	-1.7004	-0.770852	-1.32462	-1.04523
nw>contig10006|size203|read61|cov13.99_584	H-probe	0.102703	0.745715	0.469018	-1.23448	0	0.84832	0	0	0	-1.56297	0	-0.602865	-1.33857	-0.172017	0.166098	-1.23448	0	0	0.99508	0	0	-1.56297	0		0.290555	1.17802	1.46535	0.696887	1.85335	2.01622	2.46169	2.24438		-1.56297			0.725698	-0.216619	0.158693	-0.458485	0	0.822693	1.28005	0.976786	1.24543	-1.56297	0	-0.602865
nw>contig1001|size75|read15|cov10.03_1512	H-probe	-3.11187	-1.95749	-0.0822289	0.89549	-0.883673	-1.9407	-0.534116	0	0	-0.698565	0	-0.422548	-2.07743	-0.297108	-1.45458	-0.400107	-0.0979114	-3.70675	-0.534116	0	0	-0.698565	0		-1.06228	0.519928	1.21322	1.53126	2.14963	-1.69053	1.16824	0		0.377905			-2.06871	-0.714816	-0.827973	0.37589	-0.149427	-2.88406	0.745929	1.17799	0	-0.698565	0	-0.422548
nw>contig10013|size141|read62|cov21.47_527	H-probe	0.599066	-1.60191	-0.795201	-2.16438	2.29111	-0.922042	-1.70016	3.09799	-0.434994	-0.510294	-3.221	0.162264	-0.390069	0.148009	-0.836821	-2.36661	0.780218	2.75092	-0.121765	1.98636	-1.03895	-2.55148	-3.15152		3.87674	2.24728	2.47136	1.33538	5.38895	4.78237	2.55038	5.43855		-0.300975			-0.378542	-1.33661	-1.15232	-1.05799	1.93541	0.505695	0.24729	3.27043	-0.980006	-1.6976	-3.15447	-2.76938
nw>contig10015|size90|read52|cov22.28_293	H-probe	-0.211232	-1.02925	-1.27953	-0.0432498	-0.190695	0.552148	-0.0210162	-0.255369	0.0440381	-0.830809	2.41174	-0.518448	-0.189156	-1.57388	-1.23684	0.480189	-0.423526	-0.701223	1.70199	-0.0116215	-0.234792	-0.923392	2.48123		1.47922	0.984776	0.265163	1.44704	1.04746	1.05551	2.15807	2.51983		0.917502			-0.440689	-1.09155	-1.24838	0.115086	-0.27528	0.256374	-1.45918	0.778907	0.106265	-0.836699	-0.23352	-2.20099
nw>contig10015|size91|read49|cov24.10_48	H-probe	0.619002	-1.77289	-1.35251	-0.0176127	-1.33292	-2.43727	-1.50835	2.07082	0.647258	-2.11933	-6.71777	-1.83545	-1.384	-0.167437	-1.67198	-0.811704	-1.82554	-0.629538	-1.41167	-0.187813	0.00163353	-2.13796	-6.71777		3.3432	2.06031	2.03529	2.86245	1.7751	1.83273	0.945357	5.02489		1.39217			-0.0394759	-1.31256	-2.32175	-0.365925	-2.22322	-2.2324	-1.23147	2.86994	0.808402	-1.53616	-2.75111	-1.0883
nw>contig10017|size75|read13|cov8.24_39	H-probe	0	-0.304515	1.04214	-0.400107	0	0.84832	1.43816	0	0	-0.698565	0	0	0	-0.304515	0	-0.400107	0	0	0	0	0	-0.698565	0		3.64534	2.60758	2.19211	0.368431	0.72539	0	0	0		0.377905			1.04316	-0.304515	0.626611	-0.400107	0.734246	1.34336	0	0	0	-0.698565	0	0
nw>contig10018|size105|read26|cov11.84_310	H-probe	2.03022	2.2068	-1.12422	-0.102163	-1.42459	-0.052785	1.86397	2.65388	-0.119548	-2.29416	1.89757	-3.26156	0.27147	0.266682	-0.0700173	-0.434124	-0.0680128	-1.952	1.28873	0.990922	0.0343608	-1.29851	1.96706		5.22513	4.58743	1.84534	1.97211	1.97723	0.58004	3.13083	4.15563		1.01371			0.425102	0.1962	-1.71723	-3.35077	-1.41003	-0.75932	-1.59185	3.56533	-0.840543	-0.279513	-0.199144	-0.492136
nw>contig10021|size83|read38|cov22.78_1213	H-probe	0.888898	-1.78382	-0.912592	-0.661294	-1.5876	-2.30759	-2.36327	1.11455	1.04685	-1.34738	-2.3723	-0.626934	-0.378431	0.0675499	-1.35216	-0.327189	-1.99135	-0.163339	-2.15559	-0.720231	-0.991432	-1.54239	-3.26704		3.90374	2.31432	2.31236	3.17695	1.76699	2.19381	0.303878	4.51883		1.39028			0.053979	-1.70212	-1.82001	-0.338266	-1.82069	-2.36068	-3.10853	2.44145	0.693997	-0.904685	-2.60194	-0.919425
nw>contig10022|size79|read34|cov21.72_514	H-probe	-0.622607	-2.47151	-1.16787	-0.73323	-1.70065	-2.25792	-2.27904	1.63768	1.40414	-1.58616	-3.42639	-1.21137	-1.11276	0.409558	-1.37693	-1.07702	-1.75297	-0.215402	-2.22137	-0.463262	-0.60346	-3.45631	-4.18803		3.10526	2.25047	1.9784	3.10511	1.97909	2.3174	0.548248	4.56583		0.919087			-0.65676	-1.49732	-2.36408	0.0320581	-1.84307	-2.48411	-2.40683	2.28938	0.443637	-1.82964	-2.95222	-1.36636
nw>contig10023|size84|read41|cov23.36_2015	H-probe	0.143902	-2.17649	-0.658085	-1.11478	-1.19207	-2.39421	-1.30666	2.96459	1.26876	-1.6101	-5.17251	-0.863848	-0.779713	0.726855	-1.76177	-1.2049	-0.0584486	-0.227027	-1.47843	0.990922	-1.01085	-1.37647	-1.5618		3.14049	2.3524	2.06526	2.25679	2.32113	1.79171	1.01997	5.98426		1.05235			-1.18884	-0.402684	-1.92795	-1.26277	-1.6252	-2.13352	-1.25189	3.85485	-0.143967	-1.61563	-1.9082	-2.23994
nw>contig10024|size850|read899|cov39.88_3084	H-probe	0	0.252386	-0.335367	-0.400107	-1.42768	0	-0.534116	0	0	0	0	-0.422548	1.6307	-0.531826	-0.948562	0.91676	-1.42768	0	0.460964	0	0	0	0		1.03325	1.94559	0.529048	1.2371	-0.702288	0	-0.534116	0		0			1.04316	-0.531826	-0.321951	-0.400107	-0.693431	0.822693	-0.534116	0.706028	0	0	0	-0.422548
nw>contig10026|size107|read22|cov10.23_2916	H-probe	0	-1.45053	0	-1.12595	0	1.37896	1.43816	0.81248	-0.698952	-0.30955	0	0	1.6307	-0.667841	1.06944	-1.12595	1.29161	0	0.99508	0	-0.698952	-0.30955	0		0	-1.45053	1.47761	1.74823	1.56562	2.01622	0	1.80415		1.3765			1.04316	-0.699337	0	0.151882	0.734246	0.822693	1.28005	0	0.0541799	-0.30955	0	0
nw>contig10029|size72|read19|cov13.33_617	H-probe	-0.136897	-2.84531	-2.01351	-0.179385	-1.90641	-1.83775	-0.267206	1.46911	0.485474	-0.755876	-5.24558	-1.92043	-1.06051	-0.258334	-1.15186	0.131039	-1.65819	-0.716168	-1.725	0.1228	-0.394361	-1.61529	-5.24558		2.81075	2.43498	2.01606	3.50283	1.62676	1.89442	0.910384	3.8735		1.9657			0.133917	-0.47777	-1.38936	0.506941	-2.43749	-3.33756	-1.04312	2.10812	-0.199478	-1.18301	-2.43288	-3.60297
nw>contig1003|size97|read169|cov86.73_125	H-probe	-1.60887	0.557283	-1.46562	-0.196833	-4.35431	-2.68694	-1.1766	-2.94891	-0.80127	-6.44558	1.68103	-6.90352	-2.00927	-1.51754	-1.43212	-1.3408	-2.91288	-3.92958	-0.535609	-1.60519	-1.07796	-1.79591	2.81431		2.17086	1.92183	0.907244	1.15972	-1.59128	-3.19789	-0.649997	-0.58426		0.540192			-1.20786	-0.533828	-1.73532	-1.82045	-3.98683	-3.87808	-2.35846	-0.111999	-1.35761	-1.21907	-2.22289	-1.64136
nw>contig10030|size85|read20|cov11.58_2518	H-probe	-2.48207	-0.818766	0.874778	-0.669324	-1.42768	2.07094	0	0.81248	-1.31261	-2.24828	0	-1.52602	0.159837	0.303776	0.412447	-0.141053	-1.42768	1.67643	1.5784	0	-1.31261	-1.042	0		1.03725	1.63614	2.62866	2.07229	2.79268	2.01622	1.70235	2.04099		-0.135042			-0.839847	-0.865519	0.902762	0.486749	-0.209172	0.822693	0	1.17799	-0.559473	-0.60972	0	-1.52602
nw>contig10034|size110|read25|cov10.39_3120	H-probe	0	-0.522764	0	-0.400107	0	0.84832	0	0	0	-0.391157	0	0	0	0.259923	0	-0.400107	0	0	0.99508	0	0	-0.391157	0		1.03325	1.32957	0.673517	-0.400107	1.56562	0	1.70235	0		1.29489			0	-0.522764	0	-0.400107	0	0	1.28005	0	0	-0.391157	0	0
nw>contig10036|size75|read25|cov12.87_322	H-probe	-0.579498	-0.603547	-0.628732	-0.707952	0	1.37896	-0.321848	1.70871	-1.22083	-1.91604	-1.75515	-1.34461	-2.02077	-1.11028	-0.610305	-1.49655	0.785761	1.67643	0.673232	0	0.341845	-0.70976	-1.75515		1.74046	1.7035	2.57457	2.19947	3.43299	3.10652	3.00256	2.24438		-0.839567			-2.02077	-0.284378	-0.615316	0.448121	0.734246	1.34336	-0.321848	1.17799	-1.22083	-1.91604	-1.75515	-1.34461
nw>contig10038|size91|read24|cov13.11_123	H-probe	-1.57703	0.9479	-1.58544	0.0129535	-4.73669	-2.91998	-1.08308	-2.57477	-0.378288	-5.5662	-0.747389	-4.65686	-1.92481	-0.971934	-2.27488	-1.04132	-3.15498	-4.29652	-0.503704	-1.38167	-0.514955	-1.856	2.1069		2.2705	2.32774	0.715309	1.24992	-1.83542	-3.4317	-0.541432	-0.306603		0.755831			-1.16509	-0.290639	-1.90609	-1.79228	-4.38165	-4.13328	-2.17275	0.128012	-0.801155	-1.13157	-3.2131	-1.23292
nw>contig1004|size109|read71|cov31.59_2432	H-probe	-1.43539	0.864339	-1.77551	-0.322415	-4.71213	-3.05915	-1.13801	-2.65793	-0.812016	-6.74856	1.46661	-5.57324	-2.12612	-0.81262	-2.36139	-1.63206	-3.17512	-4.18444	-0.506492	-1.22465	-0.987142	-1.83212	2.72388		2.29488	2.37639	0.404258	1.00966	-1.90266	-3.59198	-0.887412	-0.588412		0.709836			-1.09239	-0.270908	-2.19993	-2.23663	-4.42149	-4.31518	-2.44346	0.178435	-1.12862	-1.10293	-1.95894	-1.4074
nw>contig10040|size124|read23|cov8.22_1126	H-probe	0.809129	0.250343	0.462236	-0.490884	0	-1.16275	0	-0.187148	-0.650237	-1.54183	-1.12948	-1.02677	-0.304129	-1.17197	1.09691	-1.27948	0.785761	-2.54171	1.5784	-0.999629	1.32466	-1.54183	-1.12948		1.52532	1.18817	2.64187	1.72689	3.51772	0.564813	2.9566	1.58159		1.58944			-1.33857	-1.95466	0.482122	-0.503483	2.11024	-2.54171	0	-0.293601	-0.650237	-1.54183	-1.12948	-1.02677
nw>contig10041|size80|read20|cov11.78_1827	H-probe	-0.168738	-2.10491	-1.26984	-0.434843	-1.2145	-2.54757	-0.824699	2.75289	1.19945	-1.43389	-2.73003	-0.545702	-1.14595	0.282393	-1.39842	-0.747939	-1.47144	-0.760273	-2.34106	0.0442773	-0.194228	-1.8037	-7.77114		2.98267	2.24806	1.89363	3.15244	2.4724	1.81725	0.811112	5.49098		1.23467			-0.435897	-1.56802	-2.2857	-0.116629	-1.25948	-2.6018	-1.2222	3.40415	0.842072	-1.24733	-2.81091	-1.28936
nw>contig10043|size78|read70|cov31.28_45	H-probe	-0.404235	1.77598	-1.43385	0.558443	-3.77248	-0.38616	0.643983	0.00689706	0.242818	-4.90457	1.78608	-4.97525	0.443639	0.669305	-0.506372	-0.195757	-0.393063	-2.46202	0.890845	1.05509	1.30693	-1.0896	-1.75515		2.97633	3.60039	1.22743	2.03997	1.07888	-0.950722	2.15869	2.29983		1.65224			0.619155	1.50146	-0.980682	-2.68452	-1.44353	-0.739429	-0.358564	2.30517	0.0802659	-1.37254	-1.75515	-0.625141
nw>contig10044|size73|read23|cov13.55_1329	H-probe	-1.704	0.875749	-1.4843	0.81598	-5.17432	-2.62484	-0.487738	-2.55829	0.383506	-4.29226	-2.19011	-2.46753	-1.85975	-0.773152	-1.69311	-0.815688	-2.95351	-4.08375	-0.302561	-1.15617	-0.115458	-1.5704	2.9246		2.22427	2.39539	0.73819	1.78775	-1.56379	-3.37936	-0.275572	-0.696255		0.687468			-1.20983	-0.336601	-1.95038	-1.19567	-3.61856	-4.16708	-1.66892	-0.108353	-0.541555	-1.21534	-2.19011	-0.312945
nw>contig10047|size594|read416|cov25.80_2106	H-probe	0	0	0	-0.479388	0	0.84832	0	0	-0.698952	0	0	0	0	0.782686	0	-0.479388	0	0	0	0	-0.698952	0	0		0	0	0	-0.479388	0.72539	0	0	0		0			0	0	0	-0.479388	0.734246	0	0	0	-0.698952	0	0	0
nw>contig10049|size94|read21|cov10.43_831	H-probe	-1.73246	0.994941	-1.40155	0.0982717	-4.84531	-3.08907	-1.07244	-3.48863	-0.265118	-6.85289	2.2925	-4.75312	-2.32202	-1.00558	-2.46366	-0.994244	-3.07575	-4.49627	-0.491975	-1.08855	-0.395573	-1.74157	3.83243		2.28064	2.41484	0.77923	1.69097	-2.03639	-3.46704	-0.641267	-1.32164		1.04884			-1.08788	-0.29822	-1.85551	-1.75729	-4.43276	-4.32459	-2.33983	0.186711	-0.589776	-0.903278	-1.49136	-1.17363
nw>contig1005|size112|read43|cov19.23_2435	H-probe	-0.808338	0.873065	-2.14209	-0.0774208	-5.16781	-3.18315	-1.07643	-2.67982	-0.62373	-5.94138	1.78608	-5.59074	-1.14076	-0.873447	-2.62925	-1.72604	-2.93135	-3.92533	-0.363237	-0.854616	-0.885595	-1.77175	1.85556		2.77213	2.28435	0.358728	1.12386	-1.65847	-3.40329	-0.715815	-0.0676093		0.89283			-0.0126525	-0.542388	-2.05587	-2.62675	-3.83637	-3.91654	-1.7951	0.565504	-1.16964	-2.05991	0.0858417	-0.775551
nw>contig10053|size93|read21|cov10.92_133	H-probe	-1.35727	0.927065	-1.4814	-0.202184	-4.95163	-3.16176	-0.974013	-3.25293	-0.152162	-5.73466	2.29954	-5.41475	-2.49741	-0.863948	-2.49198	-1.21729	-3.03522	-4.40006	-0.498268	-1.5129	-0.575141	-1.35439	3.76192		2.1598	2.27148	0.645583	1.35272	-2.05342	-3.51521	-0.491428	-1.45672		1.1014			-1.14581	-0.350837	-1.97412	-1.88728	-4.5336	-4.33979	-2.1921	-0.145307	-0.840401	-1.12965	-0.589903	-1.25823
nw>contig10058|size84|read45|cov25.49_634	H-probe	-1.3898	-1.73337	-1.86269	-0.945639	-2.37908	-2.39421	-1.02971	2.4692	1.22568	-1.46118	-4.72129	0.272633	-1.20037	0.555935	-0.522051	-1.67445	-2.15598	-0.869618	-1.12386	0.990922	-0.406236	-3.10468	-4.72129		2.40281	2.58103	2.48307	2.85731	1.91562	1.82677	0.524993	5.51917		0.0265892			-1.78791	-1.16099	-1.46458	0.343591	-2.25742	-2.43512	-1.53788	3.32297	-0.347293	-2.0643	-1.74185	-1.10346
nw>contig10063|size103|read21|cov9.11_2437	H-probe	-1.45116	0.606605	-1.6223	0.0637312	-4.75728	-2.77335	-1.05362	-3.37611	-0.888912	-5.55253	2.06885	-5.79259	-2.14246	-1.52275	-1.86218	-1.32556	-2.99144	-4.14234	-0.524247	-1.70613	-1.02727	-1.96113	2.14394		2.32477	1.97297	0.810188	1.28328	-1.68823	-3.31113	-0.592747	-0.865296		0.610052			-1.15352	-0.506116	-1.87628	-1.7577	-4.1891	-4.02737	-2.26982	-0.00466537	-1.28497	-1.31133	-2.37604	-1.61654
nw>contig10069|size103|read24|cov11.34_1839	H-probe	-1.13254	-1.58841	-0.890879	-1.16862	-0.285519	-0.111773	0.111687	-0.614544	-0.394949	-1.64776	-2.52387	-1.82754	-0.376783	-1.59187	-0.80988	-1.35373	0.0476385	0.670814	0.591274	-0.114682	-0.775387	-2.45161	-2.52387		2.06407	1.24303	1.29317	2.17551	2.77872	1.92594	1.80095	2.92681		0.968784			0.0028874	-1.30709	-2.2467	-0.176809	-0.274999	-1.26359	0.891733	1.57744	-0.618725	-2.24538	-2.52387	-3.37484
nw>contig1007|size95|read147|cov75.47_845	H-probe	-1.84831	0.447304	-1.6755	-0.155003	-4.56619	-3.13799	-1.70403	-3.27985	-1.29993	-6.29259	1.20181	-5.61818	-2.38828	-1.48578	-1.35328	-1.70884	-3.26224	-4.07358	-0.8841	-1.67985	-1.62002	-1.94436	1.56382		2.29069	1.79339	0.735616	1.02347	-1.9429	-3.26333	-1.1618	-0.920921		0.619169			-1.30282	-0.933216	-2.15489	-1.90196	-4.43724	-4.27626	-2.64815	-0.104538	-1.97859	-1.14583	-2.00665	-1.12631
nw>contig10076|size101|read50|cov24.04_242	H-probe	0.102703	-0.837906	-0.98422	-1.74298	-0.776684	0	-2.6681	0.884733	1.32324	-1.01377	-1.02875	-0.244415	0.712786	0.427579	-1.08051	-0.77623	-3.36397	2.69842	-2.11365	-0.593545	-1.35191	-1.45099	-4.56997		3.58294	2.46121	1.68562	2.44466	2.18244	5.23046	0.305759	3.47726		0.799514			-0.295407	-0.35016	-1.61681	-0.523257	-1.49445	0	-2.15881	1.10023	-1.0898	-0.00561742	-2.72898	-0.889496
nw>contig10077|size93|read25|cov12.03_543	H-probe	-1.40111	-1.08808	-0.630911	-0.137503	-1.59622	-2.49302	-3.86892	3.1007	0.656858	-1.49422	-2.68651	-1.49799	-1.91811	0.228014	-1.36382	-0.925025	-1.24403	-1.08907	-1.73116	0.662356	-0.351862	-3.17014	-6.22774		3.28453	2.61092	2.31206	3.27538	2.71899	1.35984	0.793666	5.68869		1.41369			-0.303023	-1.59059	-1.37676	0.139939	-1.08611	-2.2309	-1.37307	3.72427	-0.119449	-1.50051	-2.18375	-1.29906
nw>contig10078|size100|read17|cov8.26_144	H-probe	-0.201469	-0.883877	-0.0412526	-0.280483	-0.216545	-0.101285	0.385636	0.332551	-1.1844	-4.2815	-1.12948	-3.81201	0.0733779	-1.11511	0.0988559	-0.247413	0.474557	-1.53151	0.589679	-0.0139581	-0.178273	-1.36749	-1.12948		2.71483	1.98634	2.22412	2.65586	3.14205	1.53074	2.07489	3.09634		1.50861			0.28274	-0.365434	-0.607331	0.212434	-0.67626	-0.686444	-0.0134217	1.49523	-0.773237	-2.22134	-1.12948	-2.72512
nw>contig10082|size167|read71|cov20.33_8547	H-probe	0	-1.22961	-0.251886	0.125995	1.06593	1.37896	1.68756	0.81248	-1.88091	-2.19464	-1.75515	-0.894544	2.37664	-0.726549	-0.442257	-1.28344	-0.883673	1.06914	1.06446	0.990922	0.89772	-2.19464	-1.75515		1.62912	0.767414	0.249606	-0.819897	1.59489	1.33492	2.02844	1.80415		-1.11817			1.64223	-0.405229	-0.723026	0.10244	-0.149427	1.34336	1.81899	2.36337	-1.12778	-1.15426	0.0858417	-0.894544
nw>contig10089|size656|read426|cov23.82_2499	H-probe	0	0	0	0	0	-1.77036	0	0	0	0	0	-0.602865	0	0	0	0	1.29161	-1.77036	0	0	0	0	0		0	0	0	0	1.56562	-1.77036	0	0		0			0	0	0	0	0	-1.77036	0	0	0	0	0	-0.602865
nw>contig10094|size117|read87|cov35.67_4649	H-probe	-0.68337	-0.514547	-0.776526	-0.674851	1.65398	-1.16275	-0.0879216	1.3291	-0.247658	-1.75187	-2.19011	-1.38343	0.228671	-0.727318	0.107917	-0.400597	3.47716	0.577192	1.63508	0.990922	0.850926	-0.942066	-2.19011		-0.191113	1.3873	1.43632	1.86972	4.40965	1.60793	2.5426	3.53505		-0.353587			0.0495048	-0.397836	0.0953764	0.380282	2.31648	-0.816574	-0.246038	2.45483	0.167595	-1.15743	0.434014	-3.06597
nw>contig10096|size71|read18|cov11.76_250	H-probe	0.147858	-2.54547	-0.71787	-0.827407	-0.368865	-0.00505609	0.799068	1.23312	-1.69799	-2.35816	-1.33847	-0.588167	-2.07743	-0.559246	-0.866416	-0.0811434	0.697367	1.16758	0.0935327	-0.593545	0.0761323	-2.14774	-4.8797		3.73465	2.49105	2.4105	2.70849	3.5542	3.86332	2.39946	3.4501		0.532984			-0.455671	-1.20002	-2.12374	-0.574853	-0.845913	0.29616	-0.495834	2.05337	-0.540459	-0.120189	-2.72803	-3.51981
nw>contig10097|size263|read51|cov9.40_12451	H-probe	2.1477	-0.122574	-0.335367	0.309208	0.778772	0	-0.295598	0.81248	0.497602	-0.897016	0	-0.602865	1.03444	0.380486	-0.31694	0.324354	0.785761	0	-0.295598	0	-0.698952	-0.897016	3.61071		2.04958	2.68968	1.96687	2.24926	3.0333	2.01622	2.16609	1.80415		0.789031			0	-0.155596	-0.321951	1.46528	1.21851	0.822693	-0.295598	0.724583	-0.698952	-0.897016	0.895964	-0.602865
nw>contig10098|size112|read23|cov9.69_5252	H-probe	-1.3459	0.809704	-1.88163	-0.326716	-4.84365	-3.07589	-1.00969	-2.56869	-0.956316	-6.12297	1.18992	-5.37013	-2.22652	-0.921695	-2.54928	-1.68289	-3.23786	-4.25731	-0.549851	-1.17081	-1.18942	-1.59528	2.77806		2.21935	2.29996	0.30949	0.903083	-2.00534	-3.56529	-0.709334	-0.540232		0.786371			-1.22845	-0.355512	-2.2809	-2.31372	-4.43838	-4.25434	-2.29335	0.188584	-1.37021	-1.16148	-1.97426	-1.19064
nw>contig10102|size209|read95|cov20.45_10455	H-probe	-2.02077	-1.43945	0.957154	0.518434	1.65398	1.37896	1.18195	-0.999629	0.126171	-0.0759958	-1.75515	-1.69456	-0.390069	-0.563282	0.127051	0.0265786	0.785761	0	1.35212	-0.999629	-0.0870683	0.086154	-1.75515		1.36046	2.04507	2.81506	2.99512	3.87973	2.01622	1.99467	2.7511		2.01115			0.369608	-0.615068	0.389283	1.16751	1.21851	0.822693	0.985522	0.965409	-0.317251	0.518435	-1.75515	-1.69456
nw>contig10108|size106|read36|cov15.76_4557	H-probe	-0.994229	-1.97931	-1.1546	-2.27373	0.462499	-0.354713	-1.13395	2.24846	-2.34382	-1.32162	-2.92584	-2.15963	-0.587861	-0.00882819	-0.755498	-2.42587	0.460378	1.94429	-0.870393	0.412515	-1.30338	-2.78368	-4.04937		2.83139	2.22833	2.09257	1.35703	4.45462	4.07625	1.4803	5.21238		0.558735			-0.635864	-1.50963	-2.19118	-1.76381	0.137597	-1.0895	-1.49845	3.12026	-0.485576	-1.94708	-2.54531	-2.68881
nw>contig101084|size90|read17|cov9.30_1556	H-probe	1.44127	-1.49696	-0.290142	-0.389589	0	0	-0.58483	1.3291	-0.650237	0	0	0	0	-0.714275	-0.271715	-1.68519	1.29161	1.06914	-0.58483	0	-0.650237	0	0		3.05769	1.53511	1.89359	0.246184	2.63849	2.47711	1.11752	0.698714		1.07647			0	-1.49696	-0.903337	-1.68519	0.734246	0	0.695216	0.395779	0.102895	0	0	0
nw>contig1011|size109|read77|cov35.55_2063	H-probe	-1.81344	0.623845	-1.6264	0.111706	-4.37762	-3.21448	-1.58129	-3.41135	-1.44071	-6.20817	0.54681	-5.19752	-2.74052	-1.48715	-1.36623	-1.66356	-3.1497	-3.94488	-0.835623	-1.75055	-1.51392	-2.15153	2.16266		2.21065	1.85754	0.870629	1.12774	-1.89024	-3.26153	-1.2372	-1.12755		0.582364			-1.27284	-0.96911	-2.0518	-1.55291	-4.31289	-4.21678	-2.51917	-0.145764	-1.94244	-1.00453	-1.52393	-1.57095
nw>contig10110|size70|read21|cov14.89_758	H-probe	-0.398664	-2.03483	-1.39365	-0.634622	-1.61146	-2.49623	-2.38738	1.78719	1.14028	-2.05213	-4.07088	-0.922606	-0.734658	0.42143	-1.7025	-0.762158	-1.65238	-0.178765	-2.18981	-0.838997	-0.598648	-3.32774	-3.99589		3.23144	2.23863	1.78307	3.05428	1.99081	2.24686	0.328324	4.81235		1.10035			-0.522724	-1.29785	-2.58229	0.0206548	-2.05936	-2.53551	-2.281	2.56188	0.523077	-1.55796	-3.01398	-1.1715
nw>contig10118|size93|read27|cov13.72_3161	H-probe	-0.371846	0.899947	-1.49397	-0.430899	-4.64898	-2.46371	-0.967428	-2.88702	-1.04213	-2.28965	0	-2.4481	-3.34681	0.154756	-2.37021	-1.04408	-4.26534	-3.21338	-0.221782	0.09706	-1.03153	-3.33378	0		2.3615	2.61894	0.770497	1.82726	-1.27688	-2.45419	-0.0483519	-0.162909		0.80643			0.190153	0.542091	-1.78623	-1.75992	-2.87783	-3.21341	-2.51292	0.786952	-1.63607	-0.457874	0	-0.161539
nw>contig10122|size131|read44|cov15.57_2964	H-probe	0.102703	0.487297	-1.40968	-0.162324	1.65398	0.181372	-1.27813	0.81248	-0.860191	-1.71158	0	-1.76495	0.292132	0.188422	-0.348881	0.236678	1.6654	-2.54171	-0.283048	0	-0.860191	-1.71158	0		2.30677	3.54285	1.48165	2.70276	3.87973	1.60793	1.67847	2.85411		-0.0255299			0.30366	-0.720766	-0.784729	0.941043	1.21851	-0.816574	-1.27813	1.21783	-0.107059	-1.71158	0	-1.76495
nw>contig10126|size221|read229|cov38.33_4710	H-probe	0	0.784212	-0.903337	0.788596	0	1.76605	-0.321848	0	0	-0.698565	0	-1.13705	0	0	-0.903337	0	0.785761	0	-0.321848	0	0.983315	-0.698565	0		0	0.724835	-0.22982	1.93137	0.72539	0	-0.321848	0.698714		0.377905			1.04316	0	-0.903337	0	0.734246	0	-0.321848	0	0.753132	-0.698565	0	-1.13705
nw>contig10127|size70|read15|cov10.56_1066	H-probe	0	-1.20887	0.520898	-0.0698759	0.778772	0.84832	-0.807184	0.81248	0.540416	-0.983536	-1.12948	-0.748964	0	-0.426186	0.110377	-1.36547	1.29161	1.67643	0.771215	0	0.327177	0.222741	2.48123		1.03325	0.643465	0.609628	-1.36547	0	2.01622	-0.807184	1.16743		1.72671			1.04316	0.0337977	0.105365	-1.36547	1.21851	0	-0.807184	1.19139	-0.656138	-0.983536	-1.12948	0.806586
nw>contig10129|size117|read24|cov9.76_4367	H-probe	1.44127	-1.07195	-0.579908	-0.400107	-0.883673	-0.391403	2.14389	1.70871	-0.562343	-0.391157	0	0	0	-0.289262	-0.579908	-0.400107	-0.883673	-1.77036	0	0.990922	-0.562343	-0.391157	0		1.62912	-0.347113	1.17704	0.368431	0.681945	-1.77036	1.70235	1.52063		0.685313			0	-1.07195	0.482122	-0.400107	-0.883673	-0.427005	1.28005	0.706028	-0.562343	-0.391157	0	0
nw>contig10130|size109|read23|cov10.59_4968	H-probe	-0.690681	1.29575	-1.60647	-0.221374	-3.74424	-1.03159	0.747792	-1.52576	-1.54497	-3.1688	1.50047	-4.5978	-1.16082	-0.995872	-1.27815	-1.61063	-1.42645	-2.78502	1.06424	-0.456705	-0.680222	-1.2099	2.54188		4.16664	3.11005	1.78424	1.12727	0.244653	-1.7218	1.28695	0.687383		1.12861			-0.316947	-0.0635002	-1.94522	-2.91218	-2.08111	-2.06456	0.0329047	0.930007	-1.01694	-0.619842	-1.13643	-0.831836
nw>contig10134|size98|read26|cov11.29_2769	H-probe	-3.34681	1.13059	0.381591	-1.21289	-1.04302	1.37896	-0.321848	1.3291	-0.816705	-1.62239	0	-2.09567	-0.287078	-1.90882	0.419955	-1.19774	-1.03603	0	1.9922	0.990922	0.16661	-0.416109	0		-3.34681	2.0923	2.2036	0.565281	0.960643	0	2.63475	2.97336		0.490851			-0.690621	1.06053	-0.089549	-0.352045	-1.08755	0.822693	-0.321848	1.37817	0.428727	-1.62239	0	-2.09567
nw>contig1014|size108|read143|cov64.60_3773	H-probe	-1.58049	0.596007	-1.55969	-0.0704437	-4.55419	-2.72903	-0.97721	-3.01875	-0.842537	-5.58609	1.79945	-5.80539	-2.11484	-1.45525	-1.59352	-1.33941	-3.03942	-4.1041	-0.508402	-1.48087	-1.0742	-1.85497	2.59183		2.15601	1.95142	0.879788	1.16198	-1.7091	-3.23844	-0.536197	-0.631716		0.615029			-1.2277	-0.556802	-1.76861	-1.91998	-4.20667	-4.0023	-2.17511	-0.0322684	-1.30324	-1.23314	-2.09986	-1.57628
nw>contig10143|size1001|read578|cov21.22_71212	H-probe	0	0	0	0	0	0	0	0	-0.698952	0	0	0	0	0	0	0	0	0	0	0	-0.698952	0	0		0	0	0	0	0	0	0	0		0			0	0.75119	0	0	0	0	0	0	-0.698952	0	0	0
nw>contig10143|size128|read44|cov15.78_5271	H-probe	1.44127	0.749706	-1.01634	-1.71825	0	1.37896	1.43816	-0.999629	-0.562343	-0.334493	-2.19011	-1.34461	1.03444	-0.672612	-0.653623	-0.401381	1.6654	0	1.99261	-0.00870661	-0.562343	-0.172343	-2.19011		3.64534	2.14117	0.310201	1.40922	3.51772	2.47711	1.70235	1.72448		0.734616			1.04316	-0.212627	-1.43187	-0.440413	0.734246	0.822693	1.28005	0.390213	1.34139	-1.37862	-1.29415	-1.34461
nw>contig10144|size75|read14|cov8.63_1572	H-probe	0	-0.539388	0.462236	-1.53417	-1.82179	-1.77036	-0.58483	0	-0.698952	-0.391157	0	-0.748964	0	-0.539388	-0.579908	-1.53417	-1.82179	-0.701223	-0.58483	0	0.284363	-0.391157	0		0	-0.539388	-0.579908	-1.53417	-1.82179	-1.77036	-0.58483	0		-0.391157			0	-0.539388	-0.579908	-1.53417	-1.82179	-1.77036	-0.58483	0.395779	-0.698952	-0.391157	0	-0.748964
nw>contig10147|size96|read70|cov27.07_3613	H-probe	0	1.28942	0.0919493	-0.479388	-1.42768	-0.922042	-0.295598	-1.58447	0	-0.951837	0	0	0	1.28727	-0.521246	-0.479388	-0.641916	-0.701223	-0.295598	-1.58447	0	-0.951837	0		2.04958	2.09206	1.46963	0.289151	0.13794	-1.77036	1.40675	-1.58447		-0.951837			2.39038	0	0.874805	-0.479388	-0.693431	-1.77036	-0.295598	-0.878439	0	-0.951837	0	0
nw>contig1015|size94|read92|cov49.76_1382	H-probe	-1.8581	0.751243	-1.41875	0.0878037	-4.38177	-3.02838	-1.44704	-3.02041	-0.992299	-6.49599	0.914743	-5.33131	-2.05812	-1.22059	-1.29205	-1.55875	-2.9381	-3.87118	-0.844627	-1.54453	-1.30746	-1.83931	2.55724		2.26461	2.13504	0.961912	1.24043	-1.68987	-3.06687	-0.96461	-0.780613		0.620559			-1.14093	-0.546747	-1.91147	-1.61497	-4.27344	-4.1905	-2.46803	-0.0292763	-1.58134	-1.07308	-1.58138	-0.940702
nw>contig10150|size82|read28|cov15.90_2174	H-probe	-1.60306	0.956729	-1.56359	0.0625007	-4.86506	-3.18305	-1.02908	-3.39311	-0.353524	-6.67884	0.902454	-5.37796	-2.0907	-0.928987	-2.1485	-1.03859	-3.13822	-4.36449	-0.499091	-1.56974	-0.603547	-1.53404	3.13056		2.19146	2.37123	0.679306	1.58702	-2.02843	-3.44436	-0.516376	-1.33505		1.10007			-1.331	-0.269575	-1.89849	-1.81957	-4.45481	-4.33335	-2.19128	-0.320337	-0.812307	-0.869169	-1.85227	-0.848158
nw>contig10151|size529|read320|cov22.56_39114	H-probe	0	0.508306	0.520898	1.26991	0	0.84832	-0.321848	1.3291	0.727809	-0.391157	0	0	0	-0.275907	0.54819	0.403635	0.785761	0	-0.321848	1.98636	-0.468746	-0.391157	0		0	0.448929	0.956364	0.368431	0.72539	1.33492	1.3805	0.698714		0.685313			1.64223	0.475284	0.540785	-0.400107	1.58043	1.34336	0.958197	0	-0.468746	-0.391157	0	2.28656
nw>contig10151|size96|read58|cov28.35_3075	H-probe	0.153505	-1.99456	-1.64114	-0.758623	-1.63629	-2.41599	-2.60313	2.10606	1.0535	-2.12	-3.64891	-1.38885	-0.272072	0.584318	-1.96154	-0.849446	-1.75837	0.231581	-2.68145	-0.62975	-0.748296	-3.25935	-4.27733		3.78098	2.46108	1.59662	3.26101	2.00766	2.53997	0.0144569	5.10731		0.657217			-0.156923	-1.36463	-2.76799	-0.0869475	-2.01455	-2.13198	-2.64702	2.8261	0.58399	-1.92286	-3.19769	-1.36805
nw>contig10153|size85|read16|cov9.60_677	H-probe	0.658712	-2.64903	-0.533997	-0.34586	-1.16933	-1.79516	-1.57262	2.73677	1.0409	-1.6529	-6.65114	-0.300022	-0.823981	0.125732	-0.790049	0.299271	-1.57942	-0.131188	-2.05899	0.522024	-0.205196	-4.31068	-6.65114		3.75912	2.3478	2.52923	3.15056	2.32214	2.07661	0.609942	5.70862		1.42042			-0.220591	-1.07852	-1.37066	-0.154932	-1.69637	-3.28005	-1.68743	3.63726	0.310188	-0.778645	-3.14903	-2.54324
nw>contig10155|size107|read22|cov10.42_3778	H-probe	0.77765	0.247082	0.792197	-0.683138	-1.32004	0.952721	-0.0414953	0	-2.39323	-2.26954	1.78608	-1.90262	0.901262	-0.430708	0.667583	-0.259553	0.162048	0.332143	1.12768	1.57285	-0.0980866	-1.45974	-1.75515		1.57965	1.6267	2.40432	1.20646	2.49922	1.33616	1.13903	3.99579		0.408529			1.40443	-0.0564648	0.107771	0.125825	0.330889	-0.427005	-0.237927	3.12491	-0.489496	-0.927663	-1.75515	-1.90262
nw>contig10156|size90|read41|cov19.34_579	H-probe	0.428999	-1.15701	-0.302901	-1.71556	-0.805145	0.288928	1.09683	1.05573	-1.861	-1.16432	-2.08331	-0.70153	-0.722425	-0.289358	-0.853316	-1.93214	-0.0777874	2.04163	0.509835	0.0286155	-0.816237	-1.10945	-6.5612		3.67245	2.42849	2.56071	1.77427	3.54134	4.49501	3.04216	3.94397		1.13875			0.296512	-1.196	-1.09026	-1.38078	-1.50894	-0.0582303	0.334154	1.96949	-0.541387	-1.65876	-1.86272	-1.40481
nw>contig10157|size88|read21|cov10.18_2380	H-probe	0	0.212271	-0.948562	-1.45792	0	1.37896	0	0	1.19655	1.04413	-2.10848	0	0	-0.294466	-0.948562	-0.141053	0	0	0	1.57285	0	0	-2.10848		0	0.127879	-0.948562	-0.190633	0.72539	2.01622	1.70235	1.16743		2.11324			0	-1.07715	-0.321951	-1.45792	0	0	1.28005	0.976786	0	0	-2.10848	0
nw>contig10159|size90|read27|cov13.49_2381	H-probe	-0.334377	-1.34704	-0.718867	-2.97491	0.221555	-0.470767	-0.720575	0.642503	-1.39882	-4.05496	-1.18566	-0.457541	0.383824	-0.751795	-1.68011	-1.65892	0.236747	2.04696	-0.0820262	-0.580122	-1.58687	-1.75565	-6.94611		3.92272	2.02836	1.75108	1.59339	3.71179	3.96345	1.06476	3.61546		0.256161			1.18105	-1.42176	-1.93658	-1.7203	-0.307735	-0.816574	-0.414932	1.86228	-0.00663265	-1.9948	-2.90212	-2.20061
nw>contig1016|size70|read289|cov171.94_287	H-probe	-0.336182	-2.17489	-1.38057	-1.00532	-1.70858	-2.44331	-3.27179	2.02267	0.593543	-1.92719	-2.73912	-1.68978	-0.388514	0.361664	-1.62253	-0.76105	-1.68367	0.489451	-2.82462	-1.41046	-1.02779	-3.77343	-4.10317		3.29512	2.31023	1.88324	3.07514	1.78738	2.52334	-0.166164	4.99216		0.673009			-0.555036	-1.53054	-2.19914	-0.0889133	-2.04267	-2.80625	-2.51428	2.84046	0.411702	-2.75565	-3.13596	-1.64484
nw>contig10160|size126|read61|cov23.83_4483	H-probe	-2.10754	0.884096	-2.01947	0.0221715	-1.36921	-1.89453	0.358334	-1.09781	-2.28819	-2.66914	0	-2.62544	-1.91811	-1.63586	-1.71501	-0.706635	0.0370782	-2.08427	1.37562	-0.337446	0.682481	-0.36982	0		2.32314	2.68118	1.2053	0.837938	0.286502	-1.44132	1.17105	-0.106144		0.787647			-0.892612	0.478028	-0.971892	-1.62524	-2.19315	-1.42874	-0.505506	0.614754	0.685323	-1.03058	0	-2.62544
nw>contig10170|size118|read34|cov13.91_4088	H-probe	-0.68337	-0.761063	-0.922669	-0.169426	0.770309	2.07094	-0.623531	-0.255369	-1.42467	-2.33416	0	-3.87722	0.399524	-1.32683	0.0651773	-0.48649	1.88017	1.06914	-0.0690787	-0.593545	-0.646329	-0.0348461	0		2.03973	1.6028	1.57338	2.15127	4.44548	4.14964	2.49554	2.16626		1.71234			-0.174872	-1.3903	-1.78335	-0.0492767	1.22657	1.72514	-2.06169	1.2267	-1.8681	-0.695603	0.895964	-1.59065
nw>contig10174|size107|read30|cov13.49_189	H-probe	1.44127	0.00513432	-0.811108	0.286467	-0.104901	0.552148	0.592081	-0.999629	-0.52181	-0.272533	0	-1.34461	0	-0.293741	-1.00148	-0.442339	1.07832	-0.0939309	1.24711	-0.999629	-0.80064	-1.91604	3.61071		2.04958	1.18871	1.25518	2.41847	2.93056	1.77292	-1.5518	2.28174		1.80616			2.06426	-0.345527	-0.783124	-0.192269	0.985848	-0.0452252	-0.271759	0.957585	-0.00923068	-0.875655	0.895964	0.210945
nw>contig10175|size289|read65|cov10.30_5890	H-probe	0	0	-0.521246	-0.969983	0	0.84832	0	0	0	-0.391157	0	-0.422548	0	0.782686	-0.521246	-0.969983	0	0	0	0	0	-0.391157	0		0	0.724835	0.609628	-0.969983	0	0	0	0		-0.391157			0	0.75119	0.105365	-0.969983	0.734246	0	0	0	0	-0.391157	0	-0.422548
nw>contig10176|size87|read28|cov15.13_2291	H-probe	0.152653	-2.28164	-1.72727	-0.448807	-1.93729	-3.1378	-2.20795	1.91144	1.12071	-1.33084	-1.53637	-2.3399	-0.682909	0.48963	-1.75428	-0.645679	-2.21384	-0.453265	-2.60187	0.0471935	-0.145309	-1.6893	-2.96677		2.70588	2.04801	1.67109	2.79406	1.81195	1.71743	0.347638	5.25617		0.475306			-0.892612	-1.07445	-3.22902	-0.706292	-2.22312	-2.23008	-2.77661	2.89191	1.02039	-2.94823	-3.18938	-0.603265
nw>contig1018|size103|read410|cov195.00_399	H-probe	0.321062	-2.14143	-1.51984	-0.732283	-1.27833	-2.38714	-1.42519	2.25919	1.05521	-1.13956	-3.27309	-0.441307	-0.49139	0.413808	-1.68625	-1.03771	-1.70395	0.0397759	-1.80107	0.076077	-0.497994	-3.34034	-6.09088		3.60254	2.12669	1.63262	2.93344	2.29503	2.36182	0.716125	5.27256		1.23261			-0.0294504	-1.44269	-2.73165	-0.312065	-1.70425	-2.6893	-1.59671	2.85289	0.545404	-1.56231	-3.09551	-0.945498
nw>contig10181|size182|read69|cov18.36_7893	H-probe	0.809129	-0.304515	-0.992412	-1.32312	0	0	0	0	-0.738654	0.0605911	0	-0.602865	-1.33857	0.982758	0.0770235	-0.0062501	0.785761	1.06914	1.5784	0	0.824019	0.222741	0		1.03619	1.99305	1.92302	1.68326	2.47857	1.33492	2.9566	2.24438		1.1297			-1.33857	1.30408	-0.992412	-1.32312	0	0.822693	1.28005	0.395779	0.506778	-0.983536	0.895964	-0.602865
nw>contig10182|size198|read45|cov10.64_8394	H-probe	-1.0408	0.107511	-0.791643	-2.16808	-0.648905	1.76605	0.962303	-1.58447	-0.340997	-1.12012	0	-1.2496	-0.851374	-0.810221	-0.487178	-0.851211	-0.641916	0	-0.0750116	-0.593545	-0.619827	0.086154	3.61071		1.27916	2.12154	1.82459	1.52794	2.68783	3.10652	1.671	0.456525		2.18307			0.398497	0.0452154	-0.268824	0.021547	-0.209172	1.34336	-0.373365	-0.194625	-1.42937	-0.0797405	0.895964	-1.2496
nw>contig10183|size110|read76|cov27.70_995	H-probe	-0.211232	-1.02556	-0.0443782	-0.208138	-0.202536	1.2659	-0.716205	-0.713172	-2.3024	-1.4694	-1.31702	-1.22314	-1.79663	-0.598563	-0.53527	-1.2859	0.252821	1.67373	-0.340539	0.781723	-0.720317	-2.00737	-4.85824		4.14103	2.52539	2.57185	2.44406	4.11597	4.89486	1.88022	4.3403		1.09008			0.414717	-0.399705	-1.17597	-0.443775	-0.679584	0.256374	0.127417	2.03968	-0.293342	-1.20964	-2.23411	-1.37483
nw>contig10185|size96|read31|cov13.49_896	H-probe	-2.83107	-2.16328	-0.849524	-2.43477	-0.225272	0.300581	-2.00426	2.12699	-0.641174	-1.22853	-3.44026	-0.0365775	0.228671	0.195131	-0.985346	-2.19353	-0.781816	2.81831	-0.643514	0.401894	-0.631659	-1.81141	-2.43107		3.53764	2.54103	2.82287	1.37248	2.95545	5.32252	2.01148	4.56085		0.491347			0.0495048	-1.41309	-2.34346	-1.91297	-0.798909	0.903406	-0.695281	2.72395	0.882978	-0.716899	-3.47938	-1.77964
nw>contig10188|size101|read17|cov8.58_3898	H-probe	-1.3587	0.489252	-1.83506	-0.376503	-4.68185	-2.87877	-1.01799	-2.54466	-1.01112	-6.3822	1.18599	-3.78887	-2.06344	-1.48619	-1.9077	-1.71893	-2.98675	-4.17482	-0.585694	-1.19682	-1.17623	-1.63886	2.36475		2.34375	1.91139	0.582425	0.959353	-1.58391	-3.19885	-0.446808	-0.44947		0.806846			-1.15312	-0.60085	-2.20573	-2.35019	-3.8866	-4.16731	-2.15909	0.0525987	-1.44596	-1.02886	-2.02035	-1.03769
nw>contig1019|size91|read342|cov168.60_30105	H-probe	0.0962444	-1.7532	-1.50769	-0.713107	-1.41773	-2.00856	-1.84378	2.32896	0.988646	-1.75171	-3.8953	-0.7903	-0.0482904	0.610258	-1.68939	-0.632106	-1.63141	0.221031	-2.10123	0.290887	-0.611668	-3.27532	-3.50553		3.90843	2.42732	1.85753	2.97323	2.04904	2.56794	0.652905	5.35164		1.13755			0.326318	-1.15461	-2.29475	-0.167231	-2.02949	-2.0256	-2.028	3.24368	0.466636	-1.58842	-2.91043	-1.52257
nw>contig10191|size105|read48|cov21.26_45100	H-probe	0.0566172	-1.2662	-0.813022	-1.27124	-0.335989	0.10417	0.446284	-0.0289763	-0.208795	-1.96359	0.183478	-3.01483	-0.615143	-1.65862	0.179271	-0.572694	0.204061	-0.215747	1.2635	-0.713485	0.338615	-1.11528	0.252963		2.96325	2.17723	2.35909	2.08177	3.49387	1.92645	3.10965	3.62513		1.9502			-0.706676	-1.13126	-1.67043	0.411628	0.254261	-1.22391	0.38486	2.15098	0.588245	-0.497254	-0.950596	-1.92795
nw>contig10195|size124|read60|cov22.20_0101	H-probe	-1.17271	0.802075	-2.06374	-0.576068	-4.44223	-2.58688	-0.652637	-2.48114	-0.784041	-5.31543	0.509115	-3.95738	-1.08773	-1.18604	-1.83258	-1.89262	-2.97231	-3.6376	-0.195325	-1.17551	-0.613506	-1.59911	1.44866		2.75052	2.35919	0.589906	0.71754	-1.26795	-3.10019	0.0289051	-0.43871		0.745091			-0.894476	-0.404106	-2.25313	-2.38373	-3.41237	-3.91509	-1.68048	-0.00675967	-0.924653	-1.05863	-2.38102	-0.114275
nw>contig10196|size93|read17|cov8.96_30102	H-probe	-1.53434	0.498185	-1.82266	0.0478988	-4.75098	-2.83681	-0.947775	-2.42247	-0.882132	-4.97148	0.404021	-3.73172	-1.99461	-1.46771	-1.86757	-1.2674	-3.06238	-4.14043	-0.617148	-1.48888	-1.09145	-1.59207	2.29897		2.24637	1.83784	0.544885	1.28311	-1.56439	-3.34007	-0.401616	-0.677576		0.848584			-1.19048	-0.652245	-2.18114	-1.87714	-4.02628	-4.18048	-2.09781	-0.126499	-1.40398	-1.07607	-0.818891	-1.31162
nw>contig10197|size80|read32|cov17.19_20103	H-probe	0.143902	-1.77208	-0.936913	-0.3193	-0.54004	1.76605	0.647429	1.46957	-0.34281	-0.801738	-1.12948	-3.28325	0.0348309	-0.827723	-0.740399	-1.24144	0.779433	2.92393	1.66471	-0.00870661	0.023309	-2.44524	2.48123		2.59066	2.4545	2.32084	2.69091	3.72462	4.9035	2.91556	3.76423		1.86588			0.243636	-0.761991	-1.0798	-0.212971	0.288451	2.27606	-0.216411	1.61244	0.607044	-0.806683	-1.12948	-3.28325
nw>contig10199|size72|read17|cov11.42_12104	H-probe	0	1.10324	-0.235179	1.02514	-0.849267	-1.16275	-0.534116	0.709081	-1.2577	-1.79177	0	-1.5343	1.03444	-0.370179	-1.24444	-0.384294	-0.839413	-2.54171	1.04428	-0.999629	-1.2577	-1.79177	0		3.22851	1.68425	1.14887	1.37873	0.782297	-0.525493	2.42248	1.42298		0.321462			2.65619	0.485257	-1.24945	0.756633	-1.39677	-0.816574	-0.534116	0.191763	-0.504564	-0.751392	0	-1.5343
nw>contig10200|size95|read73|cov34.74_34106	H-probe	-0.68337	-1.94423	-1.59485	-0.667518	-1.68295	-1.61663	-0.988227	2.14949	1.20716	-1.24721	-3.59256	-0.830611	0.69038	0.383346	-1.26071	-0.483377	-1.73644	0.433074	-2.27362	0.662742	-0.180716	-2.46964	-7.13379		4.10449	2.31863	2.07699	2.74525	2.19474	2.72611	0.821672	4.9363		1.06972			0.948071	-2.01636	-1.69178	-0.247282	-1.92552	-4.50478	-1.54286	2.76515	1.01291	-0.549437	-2.64057	-1.2453
nw>contig10201|size74|read15|cov10.28_0107	H-probe	0.00305478	-1.96057	-1.56701	-0.668482	-1.75121	-2.66467	-2.21603	2.04174	1.11028	-1.77188	-3.46369	-1.01149	-0.523864	0.520917	-1.81247	-0.816942	-1.79332	-0.0781221	-2.43813	-0.317871	-0.622703	-2.89436	-4.08796		3.60271	2.40315	1.7313	3.26743	1.96241	2.34636	0.339955	5.04948		0.906985			-0.278424	-1.41482	-2.57351	-0.0238015	-2.0638	-2.4666	-2.41768	2.7858	0.544274	-1.89048	-3.14779	-1.23755
nw>contig10203|size323|read184|cov20.54_19316	H-probe	0	-0.304515	0	0	0	0	0	0	0	-0.391157	0	-0.422548	1.03444	-0.304515	0	0.803741	0	0	0	0	0	-0.391157	0		1.03325	0.420321	0	0	0.72539	0	0	0		-0.391157			0	0.446675	0	0	0.734246	0	0	0.395779	0	-0.391157	0	-0.422548
nw>contig10206|size501|read538|cov40.89_517	H-probe	-1.33857	1.21014	-0.521246	0.388489	0	0	-0.58483	0	0	-0.736268	0	-1.02677	0.292132	0.0335718	0.110377	-0.400107	0.785761	1.06914	0.410251	0	0	-0.736268	0		0.290555	1.54845	1.2357	1.53126	1.56562	0	-0.58483	1.16743		0.340201			-1.33857	0.00207557	-0.521246	-0.400107	0	0	-0.58483	0.395779	0	-0.736268	0	-1.02677
nw>contig1021|size106|read197|cov90.76_18115	H-probe	-1.8352	0.833143	-1.39831	0.158184	-4.32614	-3.04605	-1.45219	-3.03898	-0.920091	-6.28247	1.33295	-4.49442	-2.02167	-1.10472	-1.18437	-1.38944	-2.994	-3.85258	-0.837587	-1.55109	-1.25149	-1.84861	2.39997		2.299	2.22045	1.02844	1.34162	-1.67817	-3.10474	-0.916211	-0.810933		0.659353			-1.09913	-0.462032	-1.86663	-1.59649	-4.28193	-4.20916	-2.47237	-0.0182568	-1.53253	-0.958468	-1.4878	-0.937738
nw>contig10214|size80|read18|cov8.46_19110	H-probe	-1.35551	0.889438	-1.81205	-0.187321	-4.78889	-3.06987	-1.0041	-2.66648	-0.66788	-5.97119	1.76351	-5.81017	-2.15288	-0.880783	-2.33277	-1.42144	-3.19247	-4.27734	-0.549117	-1.20581	-0.903326	-1.69655	3.24476		2.22106	2.39239	0.398755	1.11935	-1.96351	-3.58296	-0.881172	-0.552949		0.838238			-1.17905	-0.262875	-2.18734	-2.18484	-4.53868	-4.1954	-2.29049	0.130049	-1.08757	-1.09717	-1.8536	-1.17383
nw>contig10217|size101|read23|cov11.16_39113	H-probe	1.44127	2.76069	-0.290142	0.892851	-2.13102	1.37896	-0.562987	-0.999629	-1.70216	-0.30955	0	-0.602865	1.6307	1.66038	-0.271715	0.0265786	-1.34526	0	-0.562987	-0.00870661	-1.70216	-0.30955	0		2.37476	1.85234	1.62264	0.860043	0.347547	0	1.8987	-0.300915		-0.30955			2.06426	1.60859	-0.903337	-0.777163	-1.39677	0	-0.562987	-0.999629	-0.94903	-0.30955	0	-0.602865
nw>contig10218|size442|read107|cov11.26_33114	H-probe	0	-0.539388	-0.992412	0.309208	0	0.84832	1.43816	0	0	-0.391157	0	0	0	0.243299	0.0770235	0.324354	0	0	0	0	0	0.81512	0		0	0.665644	0.138461	0.289151	0.72539	0	0	0		-0.391157			0	-0.539388	-0.992412	0.29661	0	0	0	0	0	-0.391157	0	0
nw>contig1022|size105|read104|cov47.58_19120	H-probe	-1.75711	0.517603	-1.64417	-0.167044	-4.49689	-3.10798	-1.60373	-3.28071	-1.26277	-5.81745	1.4886	-5.76387	-2.38244	-1.36529	-1.27169	-1.70035	-3.22775	-3.96966	-0.83282	-1.51976	-1.59173	-1.91068	1.68838		2.2244	1.88859	0.762307	0.989156	-1.90092	-3.19584	-1.08731	-0.919692		0.617009			-1.38485	-0.797564	-2.1333	-1.90702	-4.38502	-4.24739	-2.58981	-0.0575711	-1.95035	-1.10716	-1.89265	-1.03228
nw>contig10220|size262|read60|cov11.15_47116	H-probe	-0.579498	-0.284931	0	-0.445886	0	0	0	1.3291	0	-0.983536	0	-0.422548	-2.02077	-0.284931	0	-0.430741	0.785761	0	0	0	0	-0.983536	0		-0.391647	2.01263	0.673517	1.33228	2.29868	1.33492	0	1.16743		0.0929336			-2.02077	0.466259	0.626611	-1.23448	0	0.822693	0	1.21783	0	-0.983536	0	-0.422548
nw>contig10222|size140|read29|cov9.50_46117	H-probe	0	0.0285909	-1.45458	0.388489	-0.883673	-0.775663	1.11631	0	0	-0.391157	0	-1.35399	0	-0.755621	-0.385149	-0.400107	-0.0979114	-2.54171	0.673232	0	0	-0.391157	0		4.58651	2.49007	1.0714	1.2371	2.78991	-0.525493	-0.321848	1.16743		0.685313			1.04316	-0.755621	-0.827973	-0.400107	-0.883673	-2.54171	-0.321848	0.395779	0	-0.391157	0	-1.35399
nw>contig10225|size101|read27|cov13.10_38118	H-probe	1.5571	-2.04977	-1.64083	-0.168424	-1.57129	-2.32798	-1.94094	1.60663	1.34849	-1.69217	-7.17313	-1.27121	1.48845	0.289102	-1.31399	-0.452998	-1.78114	-0.557814	-1.61451	-1.26402	-0.154643	-2.91461	-2.05841		5.44137	2.1503	1.98952	3.17576	1.83429	2.01477	0.522019	4.41846		1.15934			1.76832	-1.37221	-2.33269	0.165647	-1.98549	-2.47892	-2.06767	2.06528	1.18783	-0.787153	-2.52329	-1.65339
nw>contig10229|size92|read29|cov15.82_21119	H-probe	-0.446641	-1.71487	-1.98643	-0.168013	-2.1425	-3.85536	-2.08309	2.15666	1.57661	-1.29696	-3.92235	-1.44674	-0.421902	0.240902	-1.97201	-0.827802	-2.34579	-0.90671	-2.27191	-0.923832	-0.461671	-2.98172	-2.91316		2.5452	2.44562	1.17946	2.61388	1.70421	1.98127	0.694364	4.95261		1.11827			-1.41111	-0.923486	-3.14471	-0.341983	-2.19633	-2.50254	-2.02334	2.50061	0.499293	-1.59469	-2.97036	-0.68754
nw>contig10231|size71|read19|cov13.20_11121	H-probe	-1.48904	0.504101	-2.30545	-0.56137	-4.70444	-2.87611	-0.811277	-1.98005	0.0491778	-3.98587	0.015457	-3.6732	-1.94491	-1.41967	-1.73364	-1.91687	-3.29085	-4.05918	-0.602315	-1.17644	-0.50417	-1.85664	0.926659		2.08161	1.94345	0.290896	0.673429	-1.56284	-3.35236	-0.221931	-0.20489		0.638627			-1.29797	-0.731363	-2.57656	-2.47646	-3.93643	-4.18846	-1.90451	0.464246	-0.552996	-1.26422	-2.93229	-0.747229
nw>contig10232|size105|read40|cov18.04_7122	H-probe	2.1477	0.518714	-0.294842	-1.15815	-1.82302	0.84832	-0.511486	-1.58447	-1.72211	-1.54183	0	-1.44257	1.6307	-0.903604	0.00962309	-0.629875	-0.639795	1.67643	-0.511486	-0.593545	-0.73879	-1.54183	0		2.04958	0.166048	0.701486	1.05963	-1.03617	2.01622	1.19087	-0.885754		1.58944			1.04316	0.213938	-0.000106072	-0.668908	-1.86755	0.822693	-0.511486	-0.878439	-1.72211	-1.54183	0	1.688
nw>contig10235|size94|read65|cov26.93_519	H-probe	0.809129	-0.987183	-0.651858	-0.287217	0	0.84832	-0.719121	0	-1.10117	-1.52038	0	-1.61275	-1.33857	-0.484123	0.408937	0.241054	1.6654	0	0.275959	0	-1.10117	-1.52038	0		3.53223	2.34279	2.1225	1.49095	2.78243	2.47711	0.98323	1.52063		-0.443911			-0.295407	-1.02021	-0.297951	-1.07581	0	0	-0.719121	0.961223	-1.10117	-0.479998	0	-1.61275
nw>contig10236|size107|read23|cov10.50_42123	H-probe	1.44127	0.0796428	-1.24193	-0.0499957	-0.883673	0	-0.961932	-0.999629	-0.644971	0.734577	-1.12948	-0.422548	0	-0.427094	-0.610305	0.478275	-0.883673	0	1.35212	0.573217	-1.84153	1.54438	-1.12948		1.62912	1.08778	1.555	-0.0700534	-0.158283	0	-0.961932	0.167802		-0.30955			1.04316	0.0328897	-0.179896	0.810849	0.696754	0.822693	-0.961932	-0.275045	-1.08839	-0.30955	-1.12948	-0.422548
nw>contig1024|size85|read78|cov45.56_16130	H-probe	-1.70267	0.857113	-2.11226	-0.180921	-4.52949	-3.03821	-0.992107	-0.877416	0.958387	-4.56125	0.400981	-3.08349	-1.92979	-1.0779	-1.51266	-1.19948	-3.34536	-3.84525	-0.643072	-0.0314472	0.47695	-1.93621	1.0378		1.68452	2.2678	0.226565	0.790486	-1.51268	-3.12513	-0.274871	0.718392		0.595978			-1.33787	-0.331102	-2.40961	-2.31701	-3.9516	-4.14528	-1.79091	1.30996	0.0791719	-1.44903	-0.948013	-0.852519
nw>contig10240|size75|read33|cov20.33_8125	H-probe	-1.51941	0.968201	-1.44099	0.210856	-4.65237	-3.09887	-1.12363	-3.38815	-0.503841	-6.068	1.16937	-4.83073	-2.10343	-1.01683	-1.72697	-1.01952	-3.15465	-4.09751	-0.551897	-1.42176	-0.662039	-1.59283	2.95808		2.24733	2.31476	0.896494	1.55911	-1.96684	-3.36282	-0.481263	-1.12567		1.06629			-1.31635	-0.338883	-1.84622	-1.64479	-4.47117	-4.24995	-2.18937	-0.140544	-0.977697	-0.830001	-2.1896	-0.714745
nw>contig10246|size88|read106|cov46.18_2520	H-probe	1.28127	1.3959	-1.02455	0.695795	-1.82179	2.72308	1.36874	-0.187148	1.65879	-1.743	-1.12948	-1.76495	0.712786	0.718107	-0.984379	0.724916	-0.530186	0	1.7444	1.30775	0.596736	0.110925	-1.12948		2.97172	2.53131	1.32061	2.31485	1.6112	2.82587	2.61358	2.68273		1.56019			1.31763	0.65464	-0.82202	0.217059	-0.603286	2.48857	1.50017	1.36375	0.279496	-1.743	-1.12948	-1.76495
nw>contig10247|size123|read59|cov23.25_8127	H-probe	1.44127	-1.23972	-0.948562	0.388489	0	0	0	0	-0.93209	-1.22703	0	-0.422548	0	-1.23972	-0.948562	1.29449	0	0	1.5784	0.990922	0.0512248	-1.22703	0		3.22851	1.54152	2.17815	3.03946	2.78243	2.01622	2.46169	1.52063		-0.150564			0	-1.23972	-0.321951	0.37589	0	0	0	0.395779	-0.178958	-1.22703	1.44451	-0.422548
nw>contig10249|size114|read26|cov10.68_7129	H-probe	0.137761	0.585716	0.589383	0.957012	-0.883673	1.76605	-1.06642	0	-0.93209	-0.30955	0	-1.13705	-1.44764	-0.294466	-0.208372	-0.713002	-0.883673	0	-1.06642	0.990922	-0.93209	-0.30955	0		2.04018	2.43929	1.63762	1.85376	1.59489	1.33492	1.39527	1.52063		2.4007			0.592629	1.06556	-1.27781	0.564832	0.334833	0.822693	-1.06642	0.706028	-0.93209	-0.30955	0	-1.13705
nw>contig10250|size96|read22|cov10.90_28131	H-probe	-1.37192	0.749806	-1.47588	0.111263	-4.76986	-2.97932	-0.857725	-3.03001	-1.00934	-5.62058	1.83824	-3.08239	-2.50986	-1.22865	-1.40247	-1.01682	-3.11564	-3.94152	-0.449297	-1.23651	-1.10378	-1.20844	1.33542		2.19864	2.0186	0.884938	1.27375	-1.83936	-3.37529	-0.282489	-0.954664		1.04041			-1.21831	-0.465422	-1.92203	-1.81477	-4.35161	-4.19882	-1.85694	0.0857086	-1.34662	-0.980046	-1.494	-0.549216
nw>contig10251|size120|read83|cov30.95_12132	H-probe	-0.766191	-1.05887	-1.07658	-1.60698	-0.830994	0.628861	-0.37368	0.393793	0.649998	-2.07846	-4.28061	-3.62012	-0.795324	-1.06229	0.159753	-1.69711	-1.18226	1.58532	0.932908	-0.87264	0.659513	-1.42265	-4.28061		3.07276	2.38514	2.55863	2.10293	2.53716	3.86332	2.17159	3.32683		1.46722			-1.14534	-1.58213	-1.14364	-1.23046	-1.77575	0.443488	-0.570112	1.66278	1.06117	-1.66181	-1.46791	-3.62012
nw>contig10252|size83|read25|cov15.27_12133	H-probe	-1.79586	0.637195	-1.58066	-0.0348559	-4.36841	-3.11558	-1.49467	-3.48153	-1.34448	-5.67361	0.2633	-4.83251	-2.47071	-1.46288	-1.28232	-1.59051	-3.16332	-3.99022	-0.790603	-1.74338	-1.48827	-2.07102	1.87915		2.20657	1.94379	0.888664	1.08766	-1.85841	-3.31315	-1.15053	-1.11087		0.530261			-1.14154	-0.791082	-2.03499	-1.61336	-4.2867	-4.22381	-2.45243	-0.128556	-1.88245	-0.986446	-1.59047	-1.30021
nw>contig10253|size180|read33|cov8.47_8134	H-probe	-2.48207	-0.275907	1.04214	0	0	0	0	0	-0.650237	-0.983536	0	-0.422548	-2.48207	-0.275907	0.631622	0	0.785761	0	0	0	-0.650237	-0.983536	0		-0.852952	0.929126	1.13087	1.63721	1.20583	0	0	1.16743		-0.983536			-2.48207	-0.275907	0.626611	0	0	0	0	0.395779	-0.650237	-0.983536	0.895964	-0.422548
nw>contig10255|size102|read67|cov24.68_1021	H-probe	0	0	-0.521246	0	0	0.84832	-0.260777	0	0	0	0	0	0	0	-0.521246	0	0	0	-0.260777	0	0	0	0		1.03325	0.724835	-0.521246	0	0	0	-0.260777	0		0			0	0.75119	-0.521246	0	0	0	-0.260777	0	0	0	0	0
nw>contig10257|size129|read32|cov11.42_33136	H-probe	0	-0.539388	-0.521246	-1.07581	-0.648905	0	-0.321848	0	2.28562	-0.391157	-1.12948	0	0	0.243299	-0.521246	0.618785	-0.641916	1.67643	-0.321848	0	0	-0.391157	-1.12948		2.04958	2.09792	2.00474	0.855557	0.665456	2.01622	-0.321848	2.42261		0.685313			0	0.703283	0.105365	-0.299815	-0.209172	0.822693	0.958197	0.395779	0	-0.391157	-1.12948	0
nw>contig10259|size227|read166|cov28.00_7922	H-probe	1.28127	-0.507423	1.86719	-0.400107	-0.883673	1.76605	2.14389	-0.187148	0	-0.698565	0	-1.02677	-1.33857	0.275263	0	0.403635	0.781723	0	1.99261	-0.999629	0.983315	-0.698565	0		0.711018	0.217412	1.75695	1.2371	0.681945	0	1.70235	-0.300915		0.377905			0.30366	0.735247	1.66709	0.37589	-0.149427	0	0	-0.275045	0	0.341818	0	-1.02677
nw>contig10259|size78|read30|cov17.94_15137	H-probe	-0.0870916	-2.2784	0.787309	-1.45185	0.273345	0.300581	-0.318815	1.00933	-0.145025	-1.67327	-1.86378	-1.0126	-1.71612	-0.567713	0.641612	-1.16574	0.470206	1.67373	1.40419	0.986733	-0.867976	-1.51112	-5.405		1.52398	1.84468	2.95701	1.80342	3.86269	3.72647	2.93218	3.82893		1.94908			-0.690621	-0.85126	-0.31441	-0.821003	0.670502	0.256374	1.26847	2.48935	0.266143	-1.07884	-2.78087	-3.45086
nw>contig10260|size85|read137|cov61.47_123	H-probe	0.0566172	-0.426597	-0.839759	-0.789082	-0.102526	-0.685927	0.656417	0.748327	-0.865815	-4.48892	-3.02269	-3.93515	-0.722425	-0.26173	-0.119791	-0.604942	-0.660506	-2.20543	0.40635	-0.597982	-1.23587	-2.1896	-3.02269		1.70829	2.13364	1.87961	1.92271	2.73881	1.15083	2.23016	3.7399		0.865794			0.596669	-0.614947	-1.43525	-0.293696	-0.0920059	-1.3478	-0.106258	1.72561	-1.45921	-1.09509	-3.02269	-4.06214
nw>contig10262|size114|read95|cov31.12_2524	H-probe	0	-0.728149	-0.903337	-1.07581	-1.42768	0	0	0	0	0	0	0	0	-0.728149	-0.903337	-1.07581	-0.641916	0	0	0	0	0	0		2.04958	0.476883	0.853612	0.191475	-0.702288	0	2.46169	0.698714		0			1.04316	0.514521	-0.276726	-1.07581	-1.42768	1.72514	0	0	0	0	0	0
nw>contig10262|size257|read62|cov11.23_195139	H-probe	-2.48207	-0.0591334	-1.24193	0.388489	0.778772	0	0	0	-1.41652	-1.48365	0	-0.602865	-2.48207	-0.565871	-1.24193	-0.400107	1.29161	0	1.5784	0	-1.41652	-1.48365	0		-1.44883	-0.623721	-0.111053	1.77549	0.72539	0	0	1.52063		-1.48365			-0.417809	-0.105886	-1.24193	0.37589	1.21851	0	1.28005	0.742903	-1.41652	-1.48365	0	0.952685
nw>contig10267|size105|read52|cov23.59_7140	H-probe	-1.7971	0.55802	-1.51088	-0.206003	-4.55842	-2.80156	-1.12375	-3.09464	-0.930843	-5.34049	1.59331	-6.03706	-2.18269	-1.52009	-1.57192	-1.34422	-3.05481	-4.05683	-0.581746	-1.6071	-1.15205	-1.76496	2.57188		2.0144	1.87136	0.883446	1.12497	-1.72228	-3.27528	-0.698003	-0.795247		0.563314			-1.35078	-0.651567	-1.74628	-1.99016	-4.17837	-4.03153	-2.30039	-0.188227	-1.41247	-1.12521	-2.56247	-1.36304
nw>contig1027|size105|read177|cov81.52_1145	H-probe	-1.67631	0.923094	-1.54818	0.116734	-4.93392	-3.11646	-0.961493	-3.48447	-0.398597	-6.60983	1.80213	-4.36894	-2.3554	-1.01965	-2.24887	-1.09082	-3.17489	-4.39645	-0.503599	-1.38792	-0.501155	-1.5682	3.2739		2.14164	2.37383	0.729587	1.60263	-2.07738	-3.35887	-0.45148	-1.29975		1.08731			-1.31798	-0.339307	-1.92046	-1.79742	-4.42888	-4.30929	-2.15765	-0.149506	-0.78635	-0.891565	-1.62819	-0.817499
nw>contig10273|size84|read34|cov17.46_0141	H-probe	-1.61163	0.911703	-1.50569	0.0162474	-4.81975	-3.10194	-1.06393	-3.55729	-0.464349	-7.0459	1.60976	-5.01485	-2.21778	-1.0253	-2.4198	-1.09496	-3.10328	-4.44478	-0.489462	-1.47521	-0.520798	-1.71137	3.3542		2.27454	2.35295	0.677636	1.60341	-2.07258	-3.45548	-0.673045	-1.53378		0.941174			-1.16012	-0.36127	-1.94322	-1.86366	-4.41708	-4.34434	-2.41829	-0.137808	-0.777714	-0.973148	-1.74921	-1.1583
nw>contig10276|size101|read37|cov17.31_8142	H-probe	0.492895	-1.55834	1.02489	0.246926	-0.145926	-0.719116	1.14256	1.70871	-1.9686	-0.759743	-1.12948	-2.84631	0.748517	0.152342	-0.0693425	-1.55619	0.780218	-0.939121	1.2828	1.57285	-0.98529	-0.597594	-1.12948		0.746435	0.719865	2.39615	1.74285	2.89043	0.978618	3.32165	3.75073		1.79172			0.763709	-0.0198628	0.94075	0.221811	1.62523	-0.765569	1.65186	2.17454	-1.21547	-0.763488	-1.12948	-2.84631
nw>contig10278|size93|read18|cov8.03_32143	H-probe	-1.63422	0.98946	-1.33599	0.134394	-4.82116	-3.08025	-0.985856	-3.61779	-0.256019	-6.233	2.0874	-4.74947	-2.31067	-0.944534	-2.47844	-0.959542	-3.05572	-4.49288	-0.450467	-1.09998	-0.347181	-1.79305	4.3068		2.30827	2.4565	0.819833	1.77288	-2.0453	-3.47097	-0.405888	-1.28659		1.06228			-1.1191	-0.26755	-1.75446	-1.80433	-4.46191	-4.35234	-2.2813	0.196984	-0.526785	-0.941081	-1.20608	-1.24487
nw>contig10279|size156|read49|cov13.67_90144	H-probe	0	1.45183	0	0.788596	0.778772	-1.77036	-1.1697	0	0	-0.951837	0	0	0	-0.507423	0	0	0.785761	-1.77036	-1.1697	0	0	-0.951837	0		1.03325	2.27381	1.47761	1.93137	1.56562	-1.77036	0.532648	0.698714		0.124633			0	0.243767	0.626611	0	0.734246	-1.77036	-1.1697	0	0	0.0885456	0	0
nw>contig1028|size153|read173|cov52.49_79149	H-probe	1.44127	-1.47196	0	-1.27948	0	0	1.11631	0	-0.562343	-1.19456	-1.75515	-0.748964	1.03444	-0.68927	0.631622	0.0373867	0	0	0.673232	0	-0.562343	-1.19456	-1.75515		0	1.86974	3.31097	1.28729	2.78243	0	1.3805	1.16743		-1.19456			0	-1.47196	0.626611	0.369961	0.734246	0	-0.321848	0.961223	-0.562343	-1.19456	-1.75515	-0.748964
nw>contig10282|size87|read72|cov29.75_926	H-probe	0	0	0	0	0	-1.77036	0	0	0	0	0	0	0	0	0	0	0	-1.77036	0	0	0	0	0		0	0.724835	0	0	0	-0.435445	0	0		0			0	0.75119	0	0	0	-1.77036	0	0	0	0	0	0
nw>contig10284|size130|read57|cov20.73_64147	H-probe	-1.90457	1.128	-1.26959	-0.322093	-2.40797	-0.932623	0.613117	-1.01773	-0.762526	-5.14404	-2.68637	-5.0929	-2.17141	-0.574392	-0.795778	-1.43686	-0.594777	-2.58672	0.797568	0.395362	-0.140916	-1.80036	2.42834		3.52469	3.32156	2.192	1.59843	0.914331	-1.66556	1.25417	0.636127		0.702766			-0.735423	-0.373496	-1.83344	-4.15111	-1.28687	-1.91801	-0.00717593	1.22228	-0.735118	-0.608467	-1.24186	-1.04714
nw>contig1029|size71|read40|cov26.06_11155	H-probe	-1.71116	0.277013	-1.85803	-0.548599	-4.51512	-2.77057	-0.763877	-1.52718	-1.64877	-4.31282	1.38726	-4.08663	-2.01736	-1.57577	-1.31251	-2.28139	-3.24183	-3.82053	-0.614472	-0.829837	-1.92396	-1.74717	2.08642		1.95288	1.64335	0.566242	0.288655	-1.62545	-3.287	-0.28541	0.0727821		0.764497			-1.35826	-0.736698	-2.26209	-2.45016	-4.19142	-4.17302	-1.77361	0.51311	-2.23937	-1.28294	-1.11761	-0.61635
nw>contig10307|size427|read492|cov42.24_24828	H-probe	0	0	0	0	0	-2.54171	0	0	0	0	0	0	0	0	0	0	0	-2.54171	0	0	0	0	0		1.03325	0.724835	0	0	0.72539	-2.54171	0	0		0			0	0	0	0	0	-2.54171	0	0.418751	0	0	0	0
nw>contig10309|size79|read37|cov23.59_19157	H-probe	-1.74465	0.946601	-1.37721	0.250298	-4.93236	-3.0356	-0.855155	-3.25751	-0.252192	-6.73535	2.14003	-4.47412	-2.52687	-1.06045	-2.40523	-0.898343	-3.1749	-4.51444	-0.422225	-0.78196	-0.293062	-1.55713	3.97959		2.23974	2.45373	0.846694	1.79966	-2.07505	-3.3589	-0.318754	-1.21085		1.14388			-1.19748	-0.322098	-1.78481	-1.78324	-4.42943	-4.31246	-1.97711	0.368889	-0.578109	-0.854245	-1.69106	-0.97816
nw>contig10320|size70|read20|cov14.13_1159	H-probe	1.23895	-1.497	-0.475682	-0.66862	-0.435921	-0.219201	1.18195	-0.713172	-1.49698	-1.82271	-2.10848	-1.52602	1.94975	-1.20332	-0.69874	-0.429275	-0.423526	0.382216	2.02945	-1.52565	0.477921	0.476603	-2.10848		1.84773	0.781207	0.962654	0.461047	1.67455	1.00157	2.36248	1.84533		1.30856			0.0434961	-0.467118	-1.03814	-0.30006	-0.27528	-0.265654	-0.961932	0.642124	-0.251546	-0.782331	-2.10848	-1.52602
nw>contig10321|size75|read23|cov15.44_13160	H-probe	-0.0388356	-1.919	-1.30016	-0.809696	-1.62187	-2.35828	-2.57649	2.14982	1.11487	-2.41576	-3.55618	-1.65149	-0.516228	0.599342	-1.6805	-0.896536	-1.80741	0.174074	-2.63744	-0.13111	-0.609341	-3.05186	-4.68144		3.62172	2.5091	1.90767	3.27026	2.03074	2.39704	0.0828904	5.17598		0.641675			-0.323703	-1.26597	-2.30027	-0.0632988	-1.9863	-2.13905	-2.36404	2.94694	0.501702	-1.85212	-3.08652	-1.51846
nw>contig10323|size262|read72|cov13.24_196161	H-probe	-2.02077	0.207571	-0.379217	-1.49655	0	0.84832	1.43816	0.81248	-1.00521	-1.37862	-1.12948	2.0371	-2.02077	-0.672612	0.0770235	-0.692806	0	0	0.99508	0	-1.00521	-1.37862	-1.12948		-0.391647	-0.250266	0.485198	-1.49655	1.56562	1.33492	0	1.80415		0.307427			-2.02077	-0.212627	0.0696183	0.152893	1.58043	0	0	1.37817	1.1412	1.00739	0.315027	-0.894544
nw>contig10326|size77|read30|cov17.45_13162	H-probe	0.53336	-2.19005	-1.17464	-0.281539	-1.70051	-2.68494	-1.28818	1.89886	1.10682	-2.424	-7.05541	-1.89735	-0.480918	-0.0771781	-1.48377	-0.625379	-2.26187	-1.20792	-1.42281	0.035309	0.576749	-2.17674	-3.44469		4.0223	2.08943	2.18132	2.77624	1.5235	1.27611	0.360635	4.84918		1.28511			0.190153	-1.55879	-2.04103	-0.0666209	-2.21367	-2.64052	-1.03248	2.58791	1.22371	-1.28386	-2.80157	-0.845853
nw>contig10330|size88|read25|cov13.14_1165	H-probe	0.157991	-1.40511	0.118853	-0.710561	1.62287	0.686261	-0.0960203	2.26875	0.146289	-1.48984	-0.911811	-3.4035	-0.752666	-0.0616234	-0.598204	-0.49927	1.98326	0.66949	0.383566	1.05509	0.239879	-1.89719	-5.95292		3.51242	2.33427	2.79653	2.63897	5.31097	4.50459	2.48319	4.75771		1.17604			-0.194219	-0.933629	-1.3526	0.0504454	1.33506	0.630792	0.529579	2.73325	0.532149	-1.49669	-0.771226	-3.53049
nw>contig10333|size130|read27|cov9.38_68167	H-probe	-2.02077	0.749473	0.613195	-0.777163	0	0.84832	0	0.81248	-0.895746	0	0	-1.02677	-0.390069	-0.427094	1.06944	0.917435	0	1.06914	0	0	0.0875694	1.20628	0		1.03692	1.08778	1.13087	1.15421	2.29868	2.82587	1.70235	2.42261		2.44241			-0.977609	0.0328897	0.626611	-0.00116552	0.734246	0	0	0.706028	-0.895746	1.04038	0	0.528779
nw>contig10334|size100|read76|cov35.90_32168	H-probe	-0.508129	-1.62118	-0.913779	-1.3398	0.486796	-0.769153	-0.161708	0.773447	-1.27976	-1.18414	-1.15936	-1.92029	-1.11607	-0.493092	-0.132342	-0.795071	1.03821	0.560288	0.907364	-0.150117	-0.98034	-1.50532	-6.60451		2.45147	2.5372	2.71309	2.15892	4.20218	3.22116	2.6414	3.4861		1.83773			-1.25235	-1.13647	-1.84311	-1.0748	0.097731	-0.992664	0.44987	1.47501	-0.671812	-1.19084	-1.76923	-1.72136
nw>contig10335|size199|read71|cov16.68_56169	H-probe	0.53336	-0.625655	-1.13863	-0.867504	-0.368865	1.11779	-0.198347	0.709081	0.710528	-0.905045	-2.45948	-2.80665	0.0365212	-0.719821	-0.572896	-0.69025	-0.192316	1.52028	0.649147	0.573217	-1.22955	-0.0567356	-2.45948		1.36021	1.16073	1.24862	1.93075	2.66876	2.8049	2.77939	3.10466		1.81653			-0.956438	-0.885603	-0.204547	0.359281	-0.639672	1.3485	0.404911	2.11828	-0.256637	-0.584731	-1.56351	-1.2511
nw>contig1034|size104|read36|cov17.30_13177	H-probe	0	0	0	0	0	0	0	0	0	0	0	0	0	0	0	0	0	0	0	0	0	0	0		0	0	0	0	0	0	0	0		0			0	0	0	0	0.734246	0	0	0	0	0	0	0
nw>contig10348|size320|read59|cov8.90_27176	H-probe	-1.33857	0.252386	-0.521246	0.788596	0.778772	-1.77036	0.875175	0.81248	0	0	0	-0.894544	-1.33857	0.755447	0.883613	0	0	-0.701223	0.432093	0	0	0	0		0.711018	1.76574	0.956364	0.768538	1.20583	-0.435445	-0.562987	0		0			-0.295407	-0.531826	-0.521246	0	0	-1.77036	-0.562987	0	0.753132	0	0	-0.894544
nw>contig10350|size376|read156|cov19.17_137178	H-probe	0.102703	0.857061	-2.36597	0.295661	1.28175	0	-0.807184	-0.771987	1.70252	0.174976	-2.19011	-2.03414	0.292132	-0.521966	-0.460413	-0.994328	1.29161	0	1.18543	-0.593545	-1.19657	-1.46853	-2.19011		1.30139	0.454964	0.945004	0.69518	3.0333	2.82587	2.14942	1.60136		0.973879			0.30366	-0.573751	-0.969918	0.270546	0.734246	1.72514	0.472861	0.35697	-1.19657	-1.46853	-2.19011	-0.478594
nw>contig10353|size95|read48|cov23.92_26179	H-probe	1.44127	-1.04848	-0.766021	-1.73528	-1.29081	-0.318543	-2.44545	0.731702	1.18393	-0.87191	-3.85803	-2.5751	2.37664	-0.299384	-0.727656	0.276245	-1.94881	-1.97249	-0.1314	0.460709	-0.457483	-0.70976	-3.85803		5.15131	2.30346	2.19298	2.81235	2.15742	1.93346	2.11178	2.67955		1.38715			0	-1.46868	-1.57118	-0.579205	-1.13017	-2.21893	-1.1654	1.40978	1.40098	-0.875655	-2.41352	-2.5751
nw>contig10354|size198|read35|cov8.17_43180	H-probe	0.102703	0.784212	0	-0.400107	0	-1.77036	0	0	0	0	0	0	-1.33857	0	0	-0.400107	0	-1.77036	0	0	0	0	0		-1.33857	1.20503	0	0.368431	0	-1.77036	0	0		1.07647			-1.33857	0	0	-0.400107	0	-1.77036	0	0	0.753132	0	0	0
nw>contig10356|size114|read36|cov15.56_45181	H-probe	3.25972	0.854402	-0.664613	-1.07581	-0.883673	-0.922042	2.14389	0	-0.253327	-0.391157	-1.12948	-0.422548	1.03444	0.182421	-1.27781	0.241054	-0.883673	-1.77036	0.99508	0	-0.253327	-0.391157	-1.12948		3.76123	2.14084	1.39	1.49095	1.89876	-1.77036	1.70235	1.16743		1.29489			1.64223	-0.353661	-0.215777	-0.299815	-0.883673	-0.427005	1.28005	0.706028	0.499805	-0.391157	-1.12948	-0.422548
nw>contig10358|size278|read95|cov15.88_145182	H-probe	0	-1.64632	-1.20513	-1.41823	0	1.76605	0	-0.999629	0	-0.897016	0	-0.422548	0	0.0140589	-0.135695	-0.614489	0.785761	0	0.99508	-0.999629	0	-0.897016	0		0	0.44574	1.7103	0.513139	1.20583	2.47711	0	-0.300915		0.789031			0	-0.895129	-0.57852	-0.642233	0.734246	1.34336	1.28005	0.191763	0	-0.897016	0	-0.422548
nw>contig10359|size90|read78|cov40.37_1183	H-probe	0.140098	-2.01431	-1.5184	-0.756743	-1.58274	-2.33609	-2.77326	2.14585	0.866438	-2.14927	-3.74139	-1.54318	-0.287559	0.56534	-1.94563	-0.837972	-1.6597	0.334652	-2.77419	-0.416873	-0.858178	-3.13635	-4.28788		3.72116	2.46608	1.70666	3.30071	2.07536	2.58311	-0.138547	5.19525		0.578021			-0.105873	-1.31274	-2.67009	-0.00920159	-1.91908	-2.08785	-2.85522	2.91016	0.530883	-2.0138	-3.19162	-1.67778
nw>contig10360|size206|read59|cov13.10_10184	H-probe	-0.211232	-0.627308	0.215632	0.239895	-0.840224	0.181372	0.670674	-0.255369	0.354054	-0.671673	0	-3.66139	-0.779713	-1.58602	-0.620634	-0.98132	-0.371903	-0.439206	0.369009	-0.593545	0.625476	-2.31518	0		2.59066	1.79665	2.07457	2.87037	2.53933	2.20698	2.61219	2.51983		2.28689			0.948071	-0.586828	-1.42436	0.21382	-0.473343	-0.816574	-0.664994	0.95637	0.765222	-2.31518	0	-2.10584
nw>contig10364|size77|read17|cov10.91_1185	H-probe	0.157291	-0.958682	-0.115095	-1.43073	0.596596	-1.0631	1.092	0.0534012	-1.37279	-2.99449	2.01842	-3.86617	0.369134	-1.22056	-0.672717	-0.678023	1.29935	-0.12565	1.11411	0.0308055	-1.30121	-1.12462	-2.45948		2.97601	2.25641	1.98573	2.37098	3.42447	2.75663	3.00048	3.50358		1.46456			0.511238	-1.36391	-1.63795	-0.367493	0.40693	-0.832383	1.15043	1.95282	-0.462107	-1.38697	-2.45948	-2.31062
nw>contig10365|size101|read27|cov12.33_0186	H-probe	-0.560845	-1.90946	-0.809737	-0.919581	0.618264	1.40775	0.985644	1.28372	-1.48153	-1.96017	-2.91822	-2.98635	-0.929804	-0.595886	-1.01076	-1.03234	0.959194	1.54886	0.71728	-0.595738	-0.864306	-1.88603	-2.8457		3.56062	2.49446	2.38747	2.6771	4.60638	4.76881	3.00102	3.96082		1.14544			-0.913272	-1.32626	-1.72172	-0.452266	0.553596	0.732988	0.414673	2.06836	0.228832	-1.51874	-1.75028	-4.36244
nw>contig10368|size92|read44|cov21.57_24188	H-probe	-1.41066	-1.71891	-0.779366	-0.554565	0.613512	0.606421	0.8384	1.12823	-1.39659	-1.71742	-1.05893	-0.845292	-1.14894	0.364976	-0.571969	-0.850555	0.62895	0.802789	0.236608	1.04415	-0.253268	-1.47017	-4.60015		2.31369	2.66158	2.71478	2.59455	4.58685	3.86193	2.44475	4.85361		1.9443			-1.00726	-1.19001	-1.19956	-0.583242	0.347968	-0.0582303	-0.93731	2.89476	-0.276733	-0.451167	-0.0528145	-2.58836
nw>contig10370|size219|read94|cov19.99_106189	H-probe	0.126928	-0.562214	-0.930927	-0.0521342	-1.10377	0.552148	-0.923042	0.32947	-1.56587	-1.11578	0	-1.72271	0.355872	-0.748391	-0.226743	-0.417726	0.215701	-0.701223	-0.923042	-0.00870661	-0.582556	-2.15991	0		1.62457	1.37521	1.64969	1.61095	2.02412	1.77292	3.14564	0.804519		1.14328			-0.977609	-0.628721	-0.532819	0.363153	-0.27528	-0.427005	-0.923042	0.965409	0.580536	-0.521349	0	-3.40525
nw>contig10371|size99|read29|cov13.36_39190	H-probe	-2.83107	-0.907687	-0.283169	0.42381	0.618593	0.494552	1.06723	0.32947	1.15556	-1.97221	0	-3.38074	-0.779713	-2.008	-0.33093	-0.505061	0.470206	-1.47257	1.61268	-0.00870661	-0.485847	-3.01634	0		2.7251	1.77212	1.9754	2.56455	2.99719	1.83638	3.14067	3.2535		1.51831			0.832061	-0.578375	-1.09083	0.275818	-0.0207759	-0.816574	-0.268442	1.8245	1.06643	-1.37778	0.895964	-3.38074
nw>contig10374|size124|read39|cov14.72_60191	H-probe	-0.360153	-1.54097	-0.547073	-0.519328	-0.353726	0.03918	0.722473	1.90235	-1.11429	-1.38852	-1.43702	-2.26371	-1.12555	-0.735454	-0.272451	-0.586305	0.285496	-0.438226	0.5711	0.434819	-0.00379846	-2.28309	-1.36232		2.4773	2.18219	2.22606	2.83624	3.51633	3.18877	2.61669	4.69308		0.92811			-0.821002	-1.54838	-1.41076	0.227392	-0.165565	-0.999192	0.130584	2.76759	0.421522	-1.42963	-1.91302	-2.82754
nw>contig10375|size98|read50|cov25.40_31192	H-probe	-0.623995	-1.79916	-0.706289	-1.06105	-1.75295	-1.73327	-1.32161	2.07787	0.828677	-1.02017	-1.78782	-0.796481	-0.236235	0.412725	-1.10436	-1.02699	-1.82339	0.1813	-2.27046	0.792315	-0.0815985	-1.77103	-1.71422		3.76665	2.54989	2.0195	2.86116	1.86478	2.82844	0.68479	5.33817		1.3443			0.283943	-1.40926	-1.77307	-0.283855	-1.94363	-0.512468	-1.00771	2.9833	0.235773	-2.03338	-2.78495	-1.15432
nw>contig10377|size83|read23|cov14.02_18193	H-probe	0.759468	-1.81763	-1.37213	-0.482349	-1.69708	-2.84328	-1.86579	1.64936	1.15716	-1.67089	-1.378	-1.30036	-0.391956	0.36319	-1.44224	-0.584125	-2.0553	-0.132355	-1.56682	0.0234289	0.220521	-1.40357	-7.13844		3.71747	2.50385	2.10245	3.18875	2.00467	2.09032	0.389765	4.67739		1.46581			0.247513	-1.45655	-1.93703	0.0471845	-1.99742	-2.89435	-2.31108	2.49925	0.350065	-1.35343	-2.75995	-1.47797
nw>contig10378|size96|read21|cov11.09_8194	H-probe	-1.11649	0.538892	-1.48168	0.169567	-4.73626	-3.0392	-1.22426	-3.55711	-1.5774	-7.31066	0.68975	-3.61169	-2.60704	-1.54967	-1.39558	-1.28029	-3.17645	-3.8636	-0.755411	-1.79414	-1.83644	-1.68497	3.03409		2.29509	1.77071	0.946568	1.38603	-1.78956	-3.26239	-0.778938	-1.06571		0.6958			-1.27588	-0.77354	-2.10321	-1.69958	-4.20796	-4.18575	-2.59648	-0.349047	-2.04841	-1.10282	-1.94715	-0.327723
nw>contig10379|size113|read58|cov23.35_29195	H-probe	-0.72698	-1.42472	-0.163966	0.274765	-1.28295	-3.49446	-0.0289789	1.55871	1.29503	-1.33072	0.361144	-2.94057	-1.29546	1.04725	0.0325487	-1.01381	-0.713941	-1.91177	-0.00827208	-0.91049	-0.0582526	-0.0755363	-3.18008		1.67105	2.62842	2.97462	2.95155	2.35986	0.765636	2.21249	3.94936		1.85334			-2.30365	-1.479	-0.133629	0.0146594	-0.67626	-2.99942	-1.0522	2.08327	-0.421345	-1.33447	-2.28412	-0.654012
nw>contig1038|size100|read64|cov32.38_5202	H-probe	-1.62157	0.833093	-1.30334	0.182654	-4.32773	-3.09533	-1.29529	-3.23035	-1.33853	-6.40146	1.14109	-5.75698	-2.35782	-1.35457	-1.24309	-1.21166	-3.05526	-3.94928	-0.669391	-1.45495	-1.35538	-1.79939	3.09888		2.28187	2.13467	1.04922	1.40524	-1.77782	-3.26732	-0.847258	-0.956824		0.818675			-1.19009	-0.623511	-1.82041	-1.43603	-4.32368	-4.18612	-2.39716	0.0190707	-1.68773	-0.872213	-1.32462	-1.0396
nw>contig10380|size87|read45|cov25.67_27196	H-probe	0.333762	-1.57122	-0.973972	0.0572141	-2.00866	-3.20003	-1.56928	2.41807	0.838303	-0.936953	-3.23695	-2.00192	-0.817661	0.452239	-1.32304	-0.227523	-2.38535	-1.11716	-0.831199	0.984212	-0.288948	-2.80707	-2.22775		3.39731	2.70163	2.2172	3.22307	2.03901	1.40634	0.778382	5.51811		1.28876			-0.178192	-0.99373	-1.62732	0.164397	-1.88659	-3.36548	-2.04409	2.98361	-0.0914421	-1.22492	-2.28495	-0.819363
nw>contig10385|size610|read170|cov13.10_347200	H-probe	0	0.574375	-0.903337	-0.838591	0	-1.77036	0	0.81248	0	-0.30955	0	-0.602865	0	-0.305807	-0.903337	-0.838591	0.785761	-1.77036	1.99261	0	0	-0.30955	0		2.04958	1.00357	0.853612	1.337	1.85335	1.05551	0	2.42261		0.76692			0	-0.337303	-0.903337	-0.838591	0	-0.947668	0	1.40142	1.24543	-0.30955	0	-0.602865
nw>contig1039|size199|read407|cov93.96_6207	H-probe	2.15887	-0.331127	-0.114941	-0.873651	0.105676	1.52307	1.86569	-1.71304	-0.0921197	-2.82157	-2.19011	-2.97676	1.03807	-1.23474	0.243486	-0.563227	0.944399	1.81241	1.14421	-1.5346	0.40089	-0.182418	1.4206		6.13619	2.99793	2.49706	2.44075	2.83508	3.4601	3.04328	2.66486		1.64235			1.73614	-0.561722	-0.0799598	-0.284161	0.0116945	0.718212	0.233158	1.07526	0.931262	-0.435562	-0.745603	-1.42121
nw>contig10391|size88|read28|cov14.89_20203	H-probe	-1.90554	-1.37876	-0.628935	-0.257609	-1.35225	-1.62874	0.487129	-0.187148	-2.19614	-1.59688	1.12015	-2.94057	-3.34681	-0.668961	-0.192161	-1.17975	0.470206	0.175783	0.185464	0.986733	0.943989	-1.38646	-3.35775		2.49912	2.6674	2.46087	3.17005	4.01686	1.72812	2.42865	3.73076		0.355201			-1.28255	-1.04945	-0.713078	0.0818488	-0.912513	-1.27748	0.618559	1.68507	0.157943	-2.2	-0.73362	-2.94057
nw>contig10392|size105|read35|cov14.74_30204	H-probe	-1.705	1.15335	-1.69988	-0.0476237	-4.78228	-2.99889	-1.02354	-2.71128	-0.36288	-7.10475	0.453495	-5.10865	-2.30152	-0.633917	-2.6289	-1.33195	-3.15963	-4.36368	-0.412648	-1.3604	-0.31171	-1.97279	3.30778		2.23524	2.58484	0.498711	1.32828	-1.96347	-3.62931	-0.755763	-0.735204		0.72779			-1.11869	-0.000963371	-2.11714	-1.9064	-4.51133	-4.24331	-2.2668	0.164763	-0.570365	-1.02061	-2.58451	-1.52916
nw>contig10393|size141|read114|cov30.06_7229	H-probe	0	0	0	0	-1.82179	0.84832	0	0	0	0	0	0	1.03444	0	0	0	-1.82179	1.06914	0	0	0.983315	0	0		0	0	1.13087	0.768538	-1.0964	0	0	0		0			0	0.75119	0	0	-1.08755	0	0	0	0	0	0	0
nw>contig10394|size93|read17|cov9.03_1205	H-probe	-1.72029	0.925947	-1.45278	0.149647	-4.79736	-3.10083	-1.08305	-3.66248	-0.343028	-6.46816	1.16079	-4.67605	-2.38277	-1.00712	-2.26593	-1.00846	-3.10875	-4.40144	-0.542623	-1.3795	-0.419662	-1.70127	3.4412		2.22327	2.40481	0.786985	1.73478	-2.04251	-3.40332	-0.513855	-1.35033		1.00891			-1.24888	-0.317639	-1.85845	-1.67109	-4.42674	-4.28951	-2.22686	-0.0410575	-0.690351	-0.898052	-1.72934	-1.03571
nw>contig10399|size467|read497|cov38.98_10430	H-probe	0	-0.275907	-0.579908	0.788596	0	0	0	0	0	-0.391157	0	0	1.03444	-0.275907	-0.579908	0	0	1.06914	0	0	0	-0.391157	0		0	1.28878	0.897701	1.93137	2.09313	0	0	0.698714		-0.391157			0	0.475284	-0.579908	0	1.58043	0	0	0	0	-0.391157	0	0
nw>contig10407|size77|read26|cov16.13_6210	H-probe	-1.57826	-2.12755	-1.13144	-0.542358	-1.21902	-1.62874	-2.17546	1.30434	0.0936185	-1.85205	-6.5709	-0.805335	0.244564	0.717241	-1.34688	-0.333011	-1.77556	0.263722	-2.85402	0.248467	-1.58995	-2.71147	-6.5709		2.58686	2.16291	1.61607	3.06266	1.87786	2.34618	0.669975	4.21144		0.869525			-0.845388	-2.03294	-2.55643	0.362977	-2.35422	-1.92451	-2.68363	1.94513	0.172628	-1.85759	-3.442	-0.077424
nw>contig1041|size110|read572|cov193.25_4332	H-probe	-1.51688	0.85535	-1.5267	0.190661	-4.95599	-2.88394	-0.858444	-3.16214	-0.896475	-5.69367	2.1771	-3.78245	-2.30431	-0.951069	-1.71132	-0.954584	-3.05685	-3.99026	-0.538677	-1.5908	-1.11982	-1.46443	2.3886		2.13676	2.18974	0.785121	1.3352	-1.68456	-3.25525	-0.279404	-1.01195		0.828021			-1.37369	-0.334267	-1.99417	-1.67982	-4.07998	-4.12013	-1.87423	-0.264811	-1.24552	-1.13912	-1.94584	-0.479864
nw>contig10418|size119|read23|cov8.79_49212	H-probe	0	0	0	0	0	0	0	0	0	0	0	0	0	0	0	0	0	0	0	0	0	0	0		0	0	0	0	0	0	0	0		0			0	0	0	0	0	0	0	0	0	0	0	0
nw>contig10421|size200|read36|cov8.29_67213	H-probe	0	-0.276264	-1.51596	0.892851	0.398079	-2.03322	1.39686	0.81248	0.981312	-1.95193	0	-1.13705	2.05135	0.226797	-0.884341	0.0265786	0.407933	-2.34304	0.740232	1.57285	0.123124	-1.95193	0		3.96834	2.37124	0.852721	2.3503	2.14963	-3.41218	0.128535	1.80415		-0.875463			2.06426	0.839752	-0.889352	-0.00116552	-0.883673	-3.41218	-0.29377	1.37817	-0.860191	-0.91155	0	-1.13705
nw>contig10422|size86|read57|cov31.16_9214	H-probe	1.44127	-1.5217	-0.725789	-0.842549	-1.77218	-2.27184	-2.53875	-0.187148	1.30724	0.507309	-1.64857	-0.596646	1.03444	0.332332	-0.471642	-0.410215	-1.14161	-0.63349	-1.40015	-0.00870661	0.472849	-2.15047	-5.1898		5.49051	2.10428	2.58286	3.00388	1.81286	1.24821	0.435115	4.53901		2.07773			2.39038	-1.42709	-1.40477	-0.065478	-2.2053	-2.61764	-0.951465	2.60867	-0.576857	-1.11008	-2.78264	-3.0349
nw>contig10424|size77|read14|cov8.94_17216	H-probe	-1.30926	0.732293	-1.47438	0.236312	-4.75326	-2.94256	-1.23246	-3.43136	-1.42842	-6.09689	1.5676	-2.85924	-2.45043	-1.38419	-1.30704	-0.932418	-3.03816	-3.88983	-0.631356	-1.67306	-1.62293	-1.45819	2.6317		2.29914	2.04878	0.944798	1.40331	-1.73056	-3.25208	-0.6678	-0.824055		0.862721			-1.37075	-0.539097	-2.06065	-1.74067	-4.22856	-4.17046	-2.43525	-0.140927	-1.74978	-0.95419	-1.63874	-0.39412
nw>contig10426|size103|read28|cov12.62_25217	H-probe	-1.41453	0.801572	-1.25694	0.0814434	-4.57822	-3.22467	-1.00846	-3.41572	-1.74408	-4.28547	2.41174	-4.98096	-1.94942	-1.4205	-1.7707	-1.55664	-3.07977	-5.00221	-0.536896	-1.50995	-0.99638	-2.41053	2.48123		2.70703	1.88592	0.831586	1.42654	-1.53144	-3.1495	-0.616247	-1.54047		0.100355			-0.760015	-0.713584	-2.07497	-1.73642	-4.53073	-4.45842	-2.22984	-0.477702	-1.3727	-1.53126	-0.23352	-2.6944
nw>contig10427|size85|read31|cov17.08_0218	H-probe	-1.28286	0.527832	-2.05681	-0.464852	-4.78638	-2.84137	-0.853059	-2.27032	-0.598989	-4.41429	0.184503	-3.46326	-1.86088	-1.48139	-1.9152	-1.76922	-3.15531	-4.12511	-0.611754	-1.13701	-0.980063	-1.73889	1.60059		2.26953	1.92861	0.377362	0.866122	-1.5723	-3.2996	-0.246867	-0.414414		0.780934			-1.23014	-0.632945	-2.40786	-2.48089	-3.96141	-4.26364	-2.07527	0.204428	-1.10692	-1.06602	-2.58147	-0.975016
nw>contig10429|size663|read398|cov22.24_15334	H-probe	0	0	-0.579908	0	0	0	0	0	1.19655	0	0	-1.02677	0	0	-0.579908	0	0	0	0	0	0	0	0		0	1.20503	0.0936087	1.26729	1.20583	0	0	1.80415		0			1.04316	0	-0.579908	0	0	0	0	0	0	0	0	-1.02677
nw>contig10431|size100|read43|cov21.47_38219	H-probe	-1.4483	0.410874	-1.75001	-0.163132	-4.72377	-2.93566	-0.963562	-2.61457	-0.920278	-5.29244	0.761397	-3.51102	-2.20664	-1.52997	-1.91816	-1.42634	-3.0365	-4.26029	-0.579283	-1.40908	-1.16533	-1.63704	2.04637		2.18075	1.81626	0.53591	1.13456	-1.56178	-3.34572	-0.435294	-0.692026		0.861173			-1.14987	-0.682974	-2.25694	-1.90139	-3.91364	-4.20365	-2.01801	-0.0651104	-1.4385	-1.02113	-0.940134	-1.41043
nw>contig10437|size105|read28|cov12.21_35221	H-probe	-0.357752	-0.690097	-0.264393	-1.30863	0.293711	0.740201	0.806582	-0.326989	-1.04422	-2.23189	-4.61103	-2.12796	-1.28705	-0.920268	-0.0761546	-0.938599	1.41649	-0.262661	1.16959	-0.597982	0.668498	-0.95391	-1.00032		2.30171	1.70083	2.01745	2.62271	4.26416	2.93667	3.07837	3.42804		1.16988			-0.00380482	-1.45	-0.797637	0.126365	1.29875	0.107595	0.723455	1.84033	0.610189	-1.42168	-1.79834	-3.81051
nw>contig10438|size337|read85|cov12.39_39222	H-probe	0	-0.741323	0	-0.479388	0	0	0	0	0	0	0	-0.422548	1.03444	-0.741323	0	-0.479388	0	0	0	0	0	0	0		1.03325	-0.0164874	0	-0.479388	1.20583	2.01622	0	0		0			0	0.00986729	0	-0.479388	0	0	0	0	0	0	0	-0.422548
nw>contig10442|size150|read44|cov12.34_50223	H-probe	0.268318	-1.49322	-0.998561	-1.75863	0.286872	-0.570204	-0.00314654	1.87944	-1.93735	-1.11331	-3.39114	-2.71107	-0.0398135	-0.52306	-0.947749	-1.62625	0.386824	-0.130694	1.01943	0.00650378	-0.187394	-2.52973	-2.38194		3.74557	2.25715	2.21632	2.23532	4.06108	3.06959	2.53931	4.74758		1.12998			-0.737144	-1.20742	-1.99234	-0.606192	0.0471485	-1.22824	0.375754	2.78039	-0.510581	-1.12022	-2.38503	-2.86276
nw>contig10443|size83|read20|cov11.17_1224	H-probe	0.809129	0.949295	-2.3492	0.0991828	-0.883673	-0.00431392	1.11631	0	-0.700344	-1.33804	3.54123	-1.44257	-1.33857	0.0691122	-1.71758	-0.76709	0.407933	-0.701223	1.9922	0	-0.334225	0.961278	0		2.89353	3.2275	1.84092	1.66834	2.14963	0.706752	1.3805	2.85411		1.10437			0.725698	-0.713574	-1.72259	-0.794834	-0.149427	-0.427005	0.958197	1.19139	-1.8969	-1.33804	0	-1.44257
nw>contig10444|size200|read43|cov9.96_114225	H-probe	-0.334377	-0.340245	0.168378	-0.808423	1.28175	1.11779	-0.763824	-0.246846	-2.23962	-2.04872	0	-0.765559	-0.105433	-0.813475	0.350973	-0.990564	1.962	-0.0939309	0.231256	-1.95556	-0.264724	0.250592	0		1.03725	1.63396	2.34082	2.02698	5.42002	3.33805	1.69787	2.55585		0.393683			0.174121	-1.18545	-0.824351	-1.0422	1.86952	-1.77036	1.98332	0.802795	0.457168	-2.04872	0	-2.4481
nw>contig10448|size139|read24|cov8.23_57227	H-probe	0	0.223702	-0.992412	-0.479388	-0.883673	0.84832	0	0	0	0	0	-0.422548	0	-1.06572	-0.36079	-0.479388	-0.883673	0	0	0	0	0	0		1.62912	0.498966	0.998464	1.15782	-0.883673	2.47711	1.70235	0		0			1.04316	-1.06572	-0.992412	-0.479388	-0.149427	0	0	0	0	0	0	-0.422548
nw>contig1045|size114|read539|cov226.24_25234	H-probe	-0.240336	-2.1872	-1.23885	-0.464058	-1.14978	-2.67371	-0.80954	2.7245	1.24541	-1.18753	-2.67749	-0.565739	-1.21755	0.260735	-1.447	-0.777154	-1.40672	-0.783208	-2.3259	0.0442773	-0.115355	-2.01329	-7.7186		2.93627	2.26735	1.90977	3.11188	2.51267	1.89462	0.901778	5.47352		1.19985			-0.6523	-1.50137	-2.2786	-0.102389	-1.19476	-2.64155	-1.10985	3.41161	0.830238	-1.1944	-2.79883	-1.17833
nw>contig10456|size110|read52|cov19.11_24231	H-probe	-0.0870916	-2.1522	-0.119191	-1.44513	0.14782	0.365025	-0.072909	1.7559	-1.91256	-3.34757	-0.257066	-4.2007	-0.287078	-0.889386	-1.40819	-0.587411	0.778387	-0.343206	-0.193894	0.614245	-1.41955	-3.18542	-4.73496		2.88796	1.68101	2.07909	2.22369	4.1287	3.3891	2.07209	4.46627		0.559683			-0.466244	-1.01532	-0.407934	-0.364566	1.01644	-0.765569	-0.511185	2.70346	-0.460709	-1.74004	-1.75552	-4.2007
nw>contig10458|size100|read48|cov23.49_37233	H-probe	-1.50241	0.499398	-1.83641	0.0162242	-4.74145	-2.87298	-0.918075	-2.49067	-0.861954	-5.0085	0.758103	-3.77629	-2.00223	-1.49178	-1.87084	-1.25016	-3.06825	-4.18183	-0.609824	-1.5189	-1.09506	-1.5936	2.21436		2.21726	1.82945	0.532851	1.25889	-1.58079	-3.31823	-0.400271	-0.704839		0.853129			-1.26287	-0.677832	-2.20753	-1.90597	-4.04023	-4.21343	-2.08833	-0.151478	-1.41487	-1.06366	-0.903552	-1.25277
nw>contig10462|size102|read42|cov19.93_14236	H-probe	0.113048	-2.06887	-1.7418	-0.850117	-1.69949	-2.18655	-3.26701	2.08696	0.937494	-2.08812	-3.92029	-1.43544	-0.0787422	0.460931	-1.96447	-1.1464	-1.8751	0.216909	-2.38275	-0.141722	-0.481667	-3.46095	-4.42002		3.77964	2.31482	1.45652	3.05025	1.86315	2.38749	0.0228064	5.29914		0.776289			0.00666398	-1.16067	-2.52996	-0.02677	-2.11152	-2.18597	-2.44272	3.11185	0.556511	-2.09515	-3.27086	-1.26382
nw>contig10468|size97|read18|cov9.07_1237	H-probe	-1.21429	0.575357	-1.38018	0.0986318	-4.64655	-2.93988	-1.09991	-3.37286	-1.39256	-6.06463	0.803321	-4.35857	-2.25046	-1.49376	-1.66125	-1.13731	-3.16263	-3.77643	-0.711578	-1.7945	-1.68476	-1.60865	2.38092		2.25157	1.87423	0.933098	1.47999	-1.82311	-3.07774	-0.629466	-0.979226		0.89906			-1.25069	-0.535235	-1.91147	-1.76196	-4.2729	-4.17791	-2.37922	-0.367968	-2.04146	-1.2382	-2.04682	-0.588261
nw>contig10470|size149|read69|cov19.97_12239	H-probe	-1.33857	0.499281	0.613195	0.0114329	0	0.84832	0	0	0	0	0	-1.2496	-1.33857	-0.284931	1.40486	-0.777163	0	0	0.99508	0	0	0	0		0.290555	2.01263	1.99088	1.7896	0.72539	1.33492	1.70235	0.698714		0			-1.33857	-0.284931	0.626611	-0.00116552	0	0	0	0.976786	0	0	0.895964	-1.2496
nw>contig10476|size126|read30|cov11.46_60241	H-probe	0	-0.304515	-0.903337	0.0755939	-0.883673	-1.77036	0	0	0	0	0	0	0	-0.304515	-0.271715	-0.713002	-0.883673	-1.77036	1.5784	0	0	0	0		4.455	2.94117	1.08754	0.0555362	1.59489	-1.77036	0	0		1.07647			0	1.30408	-0.276726	-0.713002	-0.883673	-0.947668	0	0.395779	0	1.04038	0	0
nw>contig1048|size122|read165|cov63.03_2251	H-probe	-1.6463	0.932313	-1.54347	0.114342	-4.93045	-3.14274	-0.984477	-3.34798	-0.345105	-6.90297	1.78619	-4.44736	-2.28786	-0.991994	-2.20886	-1.07557	-3.16252	-4.38711	-0.516444	-1.33219	-0.438991	-1.54085	3.23483		2.17822	2.38772	0.753082	1.58912	-2.07106	-3.37533	-0.46918	-1.19147		1.09399			-1.29674	-0.317127	-1.91183	-1.78643	-4.43031	-4.33533	-2.15073	-0.107716	-0.769415	-0.854154	-1.74303	-0.798079
nw>contig10480|size737|read464|cov23.58_52137	H-probe	1.44127	1.28942	0.613195	-0.479388	-0.883673	0	0	0	0	-0.391157	0	0	1.03444	0	0	-0.479388	-0.883673	0	1.5784	0	0	-0.391157	0		0	0	0.673517	-0.479388	0.681945	0	1.70235	1.16743		-0.391157			1.64223	1.24267	0.626611	-0.479388	-0.883673	0.822693	1.94745	0	0.753132	0.649226	0	0
nw>contig10481|size109|read35|cov15.04_0243	H-probe	0.230536	-2.10361	-1.66998	-0.698068	-1.61053	-2.38107	-2.89425	2.25362	0.807656	-2.24785	-3.73189	-1.51803	-0.277547	0.454097	-1.95154	-0.878749	-1.71472	0.297228	-2.81184	-0.504981	-0.882714	-3.20996	-4.00674		3.78083	2.35234	1.59388	3.30169	2.02569	2.57393	-0.260656	5.30886		0.622194			-0.0914291	-1.40084	-2.7948	-0.000245717	-1.91657	-2.12352	-3.0467	3.02945	0.598771	-2.08097	-3.28704	-1.65492
nw>contig10482|size73|read13|cov8.47_7245	H-probe	-1.59509	0.969077	-1.27915	0.108872	-4.1878	-2.94226	-1.01365	-2.3206	-0.35731	-5.45141	1.58425	-3.49789	-1.82408	-0.69844	-0.748757	-1.32306	-3.08351	-3.882	-0.581306	-0.785738	-0.907214	-1.48471	1.65896		2.19035	2.56033	1.1518	1.37668	-1.62908	-3.00039	-0.380354	-0.224312		0.867647			-1.28093	-0.106228	-1.7063	-1.5641	-4.13645	-4.18374	-1.94457	0.504076	-0.966301	-0.77557	-1.30589	-0.364494
nw>contig10482|size75|read44|cov21.09_538	H-probe	0	1.03971	-0.948562	1.67001	-0.883673	0	-0.58483	0	0.835108	-0.30955	-1.12948	-0.602865	2.8659	-0.919543	0.120874	0.803741	-0.883673	1.06914	0.993569	0	-0.361446	-0.30955	-1.12948		2.37476	0.28549	0.529048	1.93137	-0.158283	2.47711	-0.58483	0		-0.30955			1.04316	-0.919543	0.113468	0.775997	-0.149427	0	-0.58483	0.418751	-0.361446	0.730832	-1.12948	-0.602865
nw>contig104822|size78|read15|cov9.53_9244	H-probe	-0.106368	-2.28465	-1.66125	-0.608249	-1.81518	-1.97845	-2.74326	1.91834	1.30064	-2.36222	-3.42562	-1.41791	-0.467335	0.337758	-2.01439	-1.16862	-1.71575	0.296978	-2.35158	-0.479664	-0.208651	-3.54786	-4.63564		3.38081	2.20552	1.70432	3.02676	2.02752	2.40842	0.292194	4.92888		0.693914			-0.236406	-1.41094	-2.59331	0.129951	-1.66329	-1.88389	-2.46865	2.74071	0.594076	-2.22435	-2.92387	-1.75757
nw>contig10484|size94|read74|cov37.43_21246	H-probe	0.599066	-2.21744	-1.74308	-1.66103	-0.881442	-1.77036	-2.10349	1.86553	0.249312	-3.52244	-3.07441	-0.563427	0.621142	0.287048	-2.00477	-1.62828	-1.64396	3.11486	-2.79753	-0.568872	-1.8969	-2.31616	-6.61564		3.32873	1.86197	1.12005	1.94692	2.04963	4.75878	-0.674904	4.08958		0.524071			-0.378542	-1.77679	-2.32519	-0.538518	-0.931165	0.256374	-2.3378	2.20695	1.12697	-0.870783	-2.57165	-1.20851
nw>contig10485|size231|read71|cov14.20_162247	H-probe	-1.33857	-1.31072	-0.948562	-0.678777	0.778772	0.84832	2.14389	-0.999629	0.869099	0.347224	-1.12948	-1.34461	-1.33857	-0.138381	0.728258	-0.657507	0	1.67643	0.99508	-0.999629	-0.43321	-0.0900031	-1.12948		2.30677	1.6494	2.74064	1.032	3.24694	2.82587	2.46169	2.87883		-1.29628			-0.295407	-0.852259	0.447489	-1.97437	1.21851	1.34336	0	0.826704	-0.171092	-1.29628	-1.12948	-1.34461
nw>contig10486|size70|read21|cov13.24_4248	H-probe	0.24249	-2.07667	-1.8103	-0.722528	-1.60169	-2.34764	-2.97947	2.24519	0.850313	-2.29414	-3.76703	-1.4787	-0.250427	0.514802	-1.9863	-0.925958	-1.75271	0.400909	-2.76034	-0.650625	-0.884462	-3.50493	-4.14968		3.81898	2.37319	1.41295	3.24364	2.01327	2.62053	-0.222607	5.21347		0.592039			-0.189101	-1.44522	-2.99784	-0.0751777	-1.97891	-2.12004	-2.92368	2.97297	0.591674	-2.0279	-3.27585	-1.72286
nw>contig10490|size567|read314|cov21.08_19539	H-probe	0	0	-0.521246	0.0114329	0	0	0	0	0	0	0	0	0	0.782686	-0.521246	-0.777163	0	0	0	0	0	0	0		0	0	-0.521246	-0.777163	0	0	0	0.698714		0			1.04316	0	-0.521246	-0.00116552	0	0	1.28005	0.395779	0	0	0	0
nw>contig105|size84|read527|cov271.71_24306	H-probe	-0.32821	-0.931809	-0.740977	-0.300208	-0.762524	-0.339827	1.08189	1.22725	-1.67593	-1.69673	-1.3637	-3.69189	-0.686267	-0.935423	-0.24246	-0.661609	-0.286843	-0.448378	0.576539	0.476511	-0.339638	-1.65421	-2.83232		2.96814	2.39508	2.08135	2.41477	2.94176	2.40697	2.94828	3.9829		1.36694			-0.716268	-0.99522	-1.30952	0.224522	-0.492073	-0.474578	0.333723	2.28029	-0.259833	-1.16273	-1.42574	-2.0792
nw>contig1050|size101|read465|cov195.34_0260	H-probe	-0.0790056	-2.23455	-0.991307	-0.720432	-1.49571	-1.98181	-1.71575	2.10999	1.24316	-1.12909	-1.63955	-1.40306	-0.384862	0.366335	-1.16761	-1.01882	-1.71884	-0.850462	-1.78696	-0.0966328	-0.246584	-1.86282	-7.4		3.74495	2.52457	2.06624	3.15056	2.01328	2.13655	0.716359	4.89553		1.77795			-0.127016	-1.64192	-2.45558	-0.0389951	-2.52718	-3.25595	-1.96774	2.84875	0.379816	-0.91298	-2.8005	-0.978425
nw>contig10500|size194|read63|cov15.47_89256	H-probe	-1.33857	-0.679058	-0.521246	0.219784	-2.13102	0.84832	-0.321848	-0.91049	-0.860191	0.659968	0	-1.68715	-1.33857	-1.46327	1.75529	-0.272071	-0.465623	1.67643	1.25655	-0.91049	0.123124	-0.983536	0		1.71912	1.78242	2.70054	2.36376	0.651417	2.82587	1.3805	1.51212		-0.983536			-0.295407	0.679438	1.14585	-0.299815	-0.550592	1.72514	0.958197	-0.204462	-0.107059	-0.983536	0	-1.68715
nw>contig10503|size152|read40|cov12.33_15257	H-probe	2.61983	-0.264699	-0.872405	-0.777163	1.28175	2.07094	0	0	-1.82318	-0.632981	3.54123	-0.422548	1.03444	0.238361	-1.4856	0.917435	0.785761	1.67643	0	0	-0.260504	-0.632981	0		1.03325	0.15612	-0.354726	1.39843	1.56562	2.47711	1.70235	1.80415		-0.632981			0	-1.04891	-1.4856	-0.777163	1.21851	0.822693	0	0.961223	-1.07004	-0.632981	0	-0.422548
nw>contig10505|size80|read14|cov8.31_19258	H-probe	-1.37621	1.1538	-1.75263	0.00621236	-4.87337	-3.02212	-0.867962	-2.65212	-0.418414	-5.75615	0.823678	-5.90338	-2.24451	-0.684661	-2.67962	-1.23977	-3.18408	-4.31425	-0.455073	-1.29488	-0.406473	-1.67648	3.25611		2.26741	2.56175	0.416799	1.32934	-1.99006	-3.58542	-0.725684	-0.704121		0.8575			-1.12098	-0.0713956	-2.16039	-1.90323	-4.46542	-4.1808	-2.18966	0.144813	-0.674091	-1.09127	-2.12407	-1.38196
nw>contig10509|size359|read101|cov12.52_34259	H-probe	0	0	0	0	0	0	0	0	0	-0.951837	0	0	0	0	0	0	0	1.06914	0	0	0	-0.951837	0		1.62912	1.56469	0	1.26729	2.09313	1.33492	0	1.52063		-0.951837			0	0	0	0.775997	0	0	0	0.418751	0.753132	-0.951837	0	0
nw>contig10509|size83|read48|cov21.78_140	H-probe	-2.02077	-0.288178	-1.94905	1.25401	-0.883673	-1.66267	1.17738	0	0.300809	-1.12012	0	-1.01498	-2.02077	-0.290329	-1.49281	0.603865	-0.0979114	-1.97249	-0.260777	0	-0.895746	-1.12012	0		1.62457	1.20363	-0.370131	1.46259	0.96968	-3.04163	-0.260777	1.16743		-1.12012			-2.02077	-0.334931	-1.93563	0.564832	-0.149427	-1.69827	1.01927	0.724583	0.716061	-1.12012	0	-1.01498
nw>contig10517|size565|read369|cov24.04_29441	H-probe	0	-0.275907	0	0	-0.104901	-1.77036	-0.744548	-0.187148	0.943227	1.04413	-1.12948	-0.422548	1.6307	0.50678	0	0.803741	-0.0979114	-1.77036	-0.744548	-0.999629	-0.253327	0	-1.12948		0	-0.275907	0.673517	0	-0.883673	-1.77036	0.957804	-0.999629		0			1.04316	-0.275907	0	0	-0.883673	-1.77036	-0.744548	-0.293601	-0.253327	0	-1.12948	-0.422548
nw>contig10517|size70|read40|cov27.51_2263	H-probe	1.44127	-2.28011	0.140625	-1.90405	-0.54004	0.84832	-0.58483	-0.187148	-1.335	-2.00474	-3.41766	-1.13705	1.6307	-2.28011	-0.245319	-2.69265	-0.530186	2.43101	1.40778	0.573217	-0.351686	-2.00474	-3.41766		4.52225	2.03666	1.62743	1.57729	2.49631	4.26838	1.87686	1.85448		0.108494			0	-1.52892	-1.29553	-0.503026	-1.82179	0	-0.58483	0.366773	0.276806	-2.00474	-1.97315	-1.13705
nw>contig10523|size176|read64|cov17.12_48265	H-probe	2.1477	-0.560034	-0.113245	-0.713002	-1.60675	1.37896	0.630978	0	-1.19657	-0.736268	0	1.07968	0	-0.0569734	-0.0807412	-0.713002	-1.59976	0	-0.807184	1.57285	-0.213257	-0.736268	0		1.62912	1.43699	1.64111	2.52617	0.527792	2.01622	2.14942	2.04099		-0.736268			1.64223	-0.593056	-1.4856	1.68596	-2.38552	1.34336	0.472861	0.395779	0.0488607	-0.736268	0	-0.602865
nw>contig10525|size76|read29|cov18.93_13267	H-probe	0.226719	-1.84191	-1.554	-0.595203	-1.46801	-2.17724	-2.03722	1.99912	1.44957	-1.29264	-2.96137	-1.24623	-0.176101	0.407882	-1.49005	-0.574277	-1.92	-0.0468774	-1.84767	0.202463	-0.271521	-1.92286	-3.20252		4.16114	2.32653	1.81953	2.92247	2.08997	2.38912	0.768044	5.07508		1.20595			-0.323537	-1.12464	-2.31283	-0.262016	-1.69903	-2.10511	-2.04121	2.64953	0.611404	-1.44197	-2.61314	-0.857305
nw>contig10526|size80|read15|cov9.56_14268	H-probe	0.126928	-2.32499	0.130295	-0.160669	-1.27278	-2.54171	-0.909393	0.884733	1.24279	-0.34423	-4.35329	0.483543	0.0305844	-0.0530953	-0.243769	-0.342809	-2.19468	-0.110696	-1.88745	-1.58447	-1.10208	-2.73613	-4.35329		3.6286	2.18849	2.66011	3.29098	2.17734	2.62902	0.677167	3.72404		1.31038			0.0434961	-2.86323	-1.27558	0.43807	-2.27965	-1.19835	-3.88007	1.17388	0.0610172	-1.09757	-2.20162	-0.892549
nw>contig10528|size119|read98|cov30.18_3642	H-probe	-1.33857	0.332467	-1.694	-1.00254	-0.883673	1.76605	-0.260777	-0.187148	-1.16778	-0.30955	0	-1.02677	-1.33857	-0.547715	-0.289143	-1.79114	-0.0979114	0	0.734303	-0.999629	-0.184461	0.896727	0		0.290555	0.521936	0.0629471	0.384455	2.02964	2.01622	-0.260777	1.72448		2.13286			-0.295407	0.278191	-0.631972	-1.01514	0.334833	2.02674	1.01927	0.378541	-0.414644	-0.30955	0	-1.02677
nw>contig10529|size79|read48|cov29.68_7269	H-probe	1.28127	-2.06639	-1.58373	-0.367209	-1.92321	-0.983666	-1.4277	1.00904	1.25434	-2.23667	-1.69735	-3.54002	1.30334	0.272736	-0.820352	-1.54367	-1.29264	0.118851	-1.54869	-1.95556	-0.799519	-1.42687	-5.23858		5.03014	2.15239	2.00578	2.99342	1.71907	1.92911	0.253116	4.21494		1.10874			1.542	-1.30205	-1.69156	-0.393934	-1.50894	-1.68001	-2.09918	2.09884	0.401257	-0.89479	-2.61445	-1.98447
nw>contig1053|size116|read124|cov50.31_43272	H-probe	-1.29397	0.810849	-1.57864	0.225721	-4.62378	-2.56623	-0.66511	-1.83656	-0.252622	-6.18935	2.01842	-4.11383	-1.99148	-1.25674	-1.36677	-1.16121	-2.8819	-4.12356	-0.286978	-0.926068	-0.552473	-1.3306	3.37545		2.33493	2.13212	0.786405	1.17987	-1.42468	-3.27043	-0.234483	0.169796		0.760482			-1.24417	-0.227089	-1.95606	-1.89963	-3.79861	-3.90014	-1.64569	0.689537	-1.0183	-1.20087	0.164651	-0.939438
nw>contig10532|size240|read140|cov21.30_14543	H-probe	0	0	-0.521246	0	0	0	0	0	0	0	0	0	0	0	-0.521246	0	0	0	0	0	0	0	0		0	0	-0.521246	0	0	0	0	0		0			0	0	-0.521246	0	0	0	0	0	0	0	0	0
nw>contig105331|size103|read18|cov8.19_35270	H-probe	-0.393937	-1.79021	-1.23442	-1.04698	0.238159	3.17057	-0.674826	0.581138	-1.55419	-1.96013	-0.98953	-0.976628	-0.752666	-1.31853	-0.911026	-1.88078	0.778209	4.71469	0.583995	-0.822942	-0.315038	-1.71287	-1.48022		3.08584	2.1235	2.07404	1.93728	4.64339	7.0101	2.26241	3.6758		1.15116			-0.494975	-1.53096	-1.61731	-0.498386	0.142854	2.67377	-0.29465	1.40326	-0.218962	-1.28208	-2.90174	-4.27524
nw>contig10534|size120|read30|cov11.97_9271	H-probe	0	0.43336	-1.70188	-0.400107	-2.78983	-2.1852	0.268458	0	0.835108	-0.391157	0	-0.602865	0	0.0577641	-0.910216	0.403635	-1.49822	-2.88211	0.408695	0	-0.361446	1.46277	0		2.04958	1.68259	-1.64156	1.53126	-1.584	-3.95125	1.29199	0.698714		-0.391157			1.04316	-1.22951	-0.919024	-0.400107	-2.78983	-3.95125	0.110342	0.706028	-0.361446	0.649226	0	-0.602865
nw>contig10538|size133|read81|cov22.47_1644	H-probe	0	0	-0.579908	0	0	0	0	0	0	-0.30955	0	0	0	0	-0.579908	0	0	0	0	0	0	-0.30955	0		0	0	-0.579908	0	0	0	0	0		-0.30955			0	0	-0.579908	0	0	0	0	0	0	-0.30955	0	0
nw>contig10539|size77|read53|cov24.38_1745	H-probe	1.5571	0.813962	-0.977048	0.716448	-1.6744	1.24556	1.65845	0.709081	0.0160122	-2.91344	-1.75515	-3.50142	-0.43072	0.0227102	-0.440611	-0.0130677	-0.538232	-0.439206	1.77362	1.98445	0.287435	0.430236	-1.75515		2.71111	2.84253	1.79736	2.025	2.64953	1.60793	2.995	3.47181		1.87383			1.68559	0.739246	-0.677802	-0.541936	0.31076	1.42226	1.24219	2.36223	0.572167	-0.853285	-1.75515	-1.94587
nw>contig1054|size194|read565|cov126.11_13279	H-probe	1.44127	0.93041	-0.235664	0.643893	-0.648905	0	1.85189	-0.91049	-1.13697	-1.33804	0	-0.422548	2.05135	-0.19724	0.399012	0.670554	0.534319	1.06914	0.231256	-0.91049	0.425705	-1.33804	0		4.455	2.25981	2.19653	1.91605	2.17008	2.82587	0.938527	0.610144		-1.33804			1.04316	-0.733323	-0.215777	-0.0452827	-0.209172	0.822693	0.516221	-0.204462	-0.383836	-1.33804	0.895964	-0.422548
nw>contig10542|size87|read26|cov13.97_4273	H-probe	-1.33857	-1.55153	0.0910766	-1.27896	-0.145926	2.32251	0.822197	-0.999629	0.875566	-2.04554	0	-0.518448	0.712786	-1.18058	-1.22827	-1.25438	0.237718	2.92393	-1.32169	-0.999629	-0.965937	-2.04554	0		3.11643	1.2178	1.84461	0.747044	2.89043	3.34137	2.29556	3.29989		0.39687			-1.33857	-2.08977	-1.67109	-0.550011	-0.209172	0	-0.0416436	1.28498	-0.965937	-1.00515	0.895964	-2.20099
nw>contig10543|size279|read93|cov15.97_159274	H-probe	0	1.17521	-1.08081	0.582595	0.778772	-1.16275	1.11631	0	-0.698952	-0.30955	0	-1.13705	1.03444	0.962436	-1.694	0.603865	2.60122	-2.54171	0.673232	0	-0.698952	0.896727	0		0	0.324972	-0.563128	0.554285	2.09313	-1.20679	-0.321848	1.16743		1.80369			2.39038	0.368876	-1.694	0.564832	1.58043	-1.71902	-0.321848	0.961223	-0.698952	0.730832	0	-1.13705
nw>contig10544|size78|read30|cov19.06_0275	H-probe	-0.623995	-1.66202	-1.303	-0.0618595	-1.79485	-1.76226	-1.7407	0.979226	1.296	-2.33162	-5.8843	0.172483	-1.01782	-0.475432	-0.977559	-0.460166	-1.77956	-0.199837	-1.86168	-1.56431	-0.23892	-1.52182	-5.8843		2.97586	2.10931	2.46884	3.72466	2.08561	2.70642	0.286194	4.05319		1.72296			0.00278969	-1.73512	-1.51863	0.817948	-1.8095	-1.81255	-1.5036	2.07953	0.026437	-0.989741	-2.38219	-4.05089
nw>contig10548|size75|read27|cov18.04_0277	H-probe	0.155454	-2.04422	-1.1943	-0.791819	-1.7109	-2.51268	-1.57137	1.61075	1.16165	-1.08527	-3.50325	-0.622749	-0.236235	0.303148	-1.67329	-1.12232	-1.23139	-0.718359	-2.08112	-1.71344	-0.658869	-1.84652	-3.43376		3.66548	2.37933	1.78278	2.76001	2.10964	2.08724	0.480951	4.70374		1.54365			-0.809016	-1.41836	-2.2539	-0.353705	-1.76062	-2.43008	-2.62069	2.30784	0.335303	-0.504298	-2.79064	-0.496012
nw>contig10552|size76|read40|cov20.24_546	H-probe	0	0	0	0	0	0	-0.321848	0	0	-0.30955	0	0	0	0	0	0	0.785761	0	0.673232	0	0	-0.30955	0		1.62912	0.724835	1.75695	0.768538	0.72539	1.33492	1.3805	1.52063		-0.30955			0	0	0	0	0.734246	0	-0.321848	0	0	-0.30955	0	0
nw>contig10553|size132|read56|cov19.67_29280	H-probe	0	-0.76978	-0.521246	0	0.778772	0.84832	0	0	-0.361446	0	-2.10848	0	0	-0.76978	-0.521246	0	0	0	0.99508	0	-0.361446	1.20628	-2.10848		2.37476	2.01146	2.14656	1.93137	1.85335	1.33492	1.70235	1.16743		1.07647			0	-0.76978	-0.521246	1.27783	1.58043	0	0	0.418751	-0.361446	1.04038	-2.10848	0
nw>contig10556|size127|read41|cov12.98_0281	H-probe	0.809129	-1.64925	-1.37024	-0.536873	-0.836052	1.47689	-0.228744	0.483305	-1.71875	-2.95314	1.35111	-3.28816	2.04477	-0.207479	0.0866964	-0.191156	-0.476576	0.748927	0.618749	0.781723	0.376449	0.390542	-2.19011		3.47968	1.89715	1.47554	2.00335	1.86059	2.20698	2.43739	3.17047		1.35799			1.73614	-0.549544	-0.540896	-0.34793	-0.583182	0.916824	0.0293825	1.84212	-0.379716	-0.0772307	-0.349124	-3.28816
nw>contig10559|size71|read25|cov17.77_10283	H-probe	-0.435999	-2.47402	-1.86696	-0.621803	-1.50303	-2.28667	-3.35639	2.1261	0.658575	-2.06548	-3.46579	-2.18483	-0.719382	0.210542	-2.0134	-1.06029	-1.81603	-0.012607	-2.96174	0.0913734	-0.784109	-3.03974	-4.36052		3.08368	2.16585	1.36562	3.12649	1.93625	2.17809	-0.103564	5.38712		0.866386			-0.773744	-1.31287	-2.50237	-0.025098	-2.05924	-1.78619	-2.40743	3.22526	0.341127	-1.87893	-3.56756	-1.65823
nw>contig1056|size75|read40|cov26.29_15288	H-probe	-1.54273	1.08751	-1.6049	-0.173807	-4.71879	-2.8502	-0.944927	-2.42765	-0.441229	-5.35663	-4.24798	-4.84514	-2.10019	-0.876415	-2.50136	-1.24884	-3.10016	-4.23773	-0.345134	-1.11058	-0.353098	-1.72859	3.33453		2.30502	2.52191	0.605414	1.14783	-1.84368	-3.4182	-0.498491	-0.263455		0.768403			-0.994638	-0.121269	-2.06398	-1.83175	-4.35824	-4.09736	-2.0816	0.532133	-0.745747	-1.16403	-2.40699	-0.911684
nw>contig10561|size215|read53|cov11.77_117284	H-probe	0	-0.706874	-0.521246	0	0.778772	0	1.11631	-0.999629	-0.860191	-0.391157	0	-0.602865	0	0.953504	0.110377	0	0	1.06914	-0.321848	-0.999629	-0.860191	0.81512	0		1.62912	1.14546	1.84744	2.87418	0.72539	1.33492	2.13984	0.167802		-0.391157			0	-0.706874	-0.521246	0	0.734246	0	1.62561	-0.256726	-0.107059	-0.391157	0	-0.602865
nw>contig10570|size85|read43|cov23.88_4289	H-probe	-0.0244999	-1.73358	-1.38952	-2.56286	1.23407	0.766293	-0.00526454	0.0986514	-2.68038	-1.55599	-5.32419	-1.79382	-1.08405	-0.932954	-1.1964	-2.22287	0.286905	1.93893	0.370401	-0.982387	-0.906263	-1.64857	-5.32419		2.46815	2.31258	1.78374	1.6397	4.37934	4.28432	2.18904	3.18183		1.05429			-1.06976	-1.29293	-2.44672	-1.45708	0.365877	-0.427005	0.838357	1.25699	-0.903421	-1.88773	-1.2802	-3.47636
nw>contig10573|size192|read58|cov14.65_126291	H-probe	0	-0.284931	0	0	0	0	-0.321848	0	0	-0.736268	0	0	0	-0.284931	0	0	0	0	-0.321848	0	0	-0.736268	0		0	-0.284931	0	0	0.72539	0	-0.321848	0		-0.736268			0	-0.284931	0	0	0	0	-0.321848	0	0	-0.736268	0	0
nw>contig10575|size75|read20|cov11.71_13292	H-probe	0.278158	-2.19301	-2.11474	-0.569272	-1.58107	-2.15436	-3.33992	2.40364	0.45288	-2.14445	-3.6905	-1.36327	-0.449842	0.340635	-2.68918	-0.889828	-1.63772	0.267914	-3.06891	-1.15612	-1.11615	-3.41513	-3.61519		3.50322	2.29154	1.1575	3.17975	2.04773	2.52301	-0.647941	5.51737		0.616753			-0.250767	-1.55815	-3.25008	-0.00601427	-1.81373	-2.0847	-3.10185	3.19429	0.607986	-1.78847	-3.39861	-2.06238
nw>contig1058|size84|read140|cov82.25_17298	H-probe	-0.123704	-2.07016	-1.49949	-0.70166	-1.71557	-2.41722	-2.13433	2.08103	1.09938	-1.55767	-3.13465	-1.03054	-0.312449	0.350918	-1.65024	-1.00501	-1.77741	-0.150578	-2.17221	-0.199138	-0.596417	-2.87325	-4.31824		3.51487	2.2516	1.71592	3.06425	1.9172	2.14763	0.416402	5.10269		1.08647			-0.300714	-1.35569	-2.40886	-0.0733579	-2.03976	-2.5326	-2.15671	2.88534	0.450264	-1.72923	-3.05526	-1.23887
nw>contig10581|size165|read29|cov8.25_105294	H-probe	0	1.41987	0	0	0	0	0	0	0	-0.951837	0	0	0	-0.539388	0	0	0	0	0	0	0	-0.951837	0		1.62912	0.665644	1.13087	0.768538	1.56562	0	0	1.16743		-0.951837			0	0.211802	0	0.775997	0	0	0	0	0	-0.951837	0	0
nw>contig10582|size107|read111|cov37.66_4647	H-probe	0	0	-0.521246	0	0.778772	0.84832	-0.807184	-1.58447	-0.468746	-0.30955	0	0	0	0	-0.521246	0	0	0	1.18543	-1.58447	-0.468746	-0.30955	0		0	1.85234	-0.521246	0	1.56562	0	-0.807184	-1.58447		-0.30955			0	0	-0.521246	0	0	0	-0.807184	-1.58447	-0.468746	-0.30955	0	0
nw>contig10582|size82|read20|cov12.44_9295	H-probe	-1.56419	0.717113	-1.80876	0.289806	-4.52075	-2.67615	-0.889136	-2.13257	-0.523063	-5.29525	-0.117214	-4.73943	-1.83748	-1.16546	-1.77052	-0.900966	-2.91162	-3.80956	-0.607921	-1.85281	-0.558492	-1.75308	2.84505		2.28987	2.04575	0.764438	1.52786	-1.40475	-3.33111	-0.523077	-0.64574		0.819058			-1.06237	-0.419998	-1.94682	-1.8792	-3.72036	-4.12703	-2.06986	-0.244848	-0.687645	-1.45883	-0.270337	-1.43985
nw>contig10587|size177|read36|cov10.00_77296	H-probe	-1.33857	0	0	0	0	0	-0.321848	0	0	-0.30955	0	-0.602865	-1.33857	0	0	0	0	0	0.673232	0	0	-0.30955	0		-1.33857	0	0	0.768538	1.20583	1.33492	-0.321848	1.16743		-0.30955			-1.33857	0.75119	0	0	0	0	-0.321848	0.706028	0	-0.30955	0	-0.602865
nw>contig1059|size84|read30|cov17.19_14305	H-probe	0.159553	0.748142	-2.23183	0.0156531	-4.83752	-3.06735	-0.899367	-0.920896	-0.777994	-2.88853	1.43275	-3.06518	-0.610526	-0.558536	-1.22025	-1.24108	-3.19044	-3.90897	-0.317377	-0.131897	-1.38195	-1.89288	3.41082		2.98418	2.50726	0.516429	1.06573	-1.30143	-3.09179	-0.515553	0.0358045		0.470146			-0.594611	-0.0678985	-1.93132	-1.73212	-3.69562	-4.40116	-1.04487	0.640285	-0.0157246	-0.650558	-2.10848	-0.397606
nw>contig10593|size97|read22|cov11.40_3299	H-probe	-1.42544	0.426631	-1.83102	-0.185428	-4.6695	-2.85808	-0.98587	-2.39035	-0.733104	-5.06907	-0.107006	-3.87815	-1.97498	-1.51722	-1.84061	-1.36338	-2.95584	-4.1127	-0.59342	-1.46783	-0.992271	-1.75542	2.08532		2.28419	1.79535	0.594405	1.18853	-1.53956	-3.31216	-0.439244	-0.636735		0.846823			-1.15184	-0.721351	-2.2401	-2.0228	-3.90918	-4.1943	-2.15257	-0.0314124	-1.22062	-1.13475	-0.989305	-1.42357
nw>contig10595|size107|read29|cov13.23_35301	H-probe	0.0578839	-1.66532	-0.568906	-1.92626	0.929808	0.229271	1.16471	1.76431	-1.17214	-1.4991	-2.34287	-0.0498197	-0.802992	-0.413513	-0.373574	-1.95505	0.777301	1.6945	-0.0305789	0.188671	-0.972731	-2.45589	-3.81149		3.38713	2.34441	2.71882	1.70441	4.71519	4.42665	2.77655	4.46746		1.35368			-0.670929	-1.7434	-1.7131	-1.46679	0.753354	-0.113405	0.752288	2.35364	-0.381761	-2.31619	-2.64352	-3.92015
nw>contig10596|size92|read15|cov8.21_9302	H-probe	1.44127	-0.888006	-0.480108	-0.235272	-1.42768	0.552148	-0.807184	-0.999629	0.634211	0	-1.12948	-0.422548	1.03444	0.399267	-1.85246	-0.220126	-1.42768	-0.0939309	1.18543	-0.999629	1.41256	1.20628	-1.12948		3.38123	1.7493	0.673518	1.5429	1.21081	1.05551	0.895167	0.167802		2.11324			0	1.01222	-0.456413	-0.24787	-1.42768	-0.0452252	-0.807184	-0.603849	-0.562343	0	-1.12948	-0.422548
nw>contig10597|size96|read17|cov9.01_13303	H-probe	-0.573838	-1.78038	-0.642184	-0.400323	-1.7021	-2.51268	-1.8796	1.32623	0.805768	-0.866787	-1.53494	-1.337	-1.49745	-0.283251	-0.65035	-0.448138	-2.34489	-1.02767	-2.33601	-0.625629	-0.85327	-3.94315	-6.01284		3.13099	1.98768	2.48012	2.81481	1.69735	0.748486	1.44524	3.65687		1.52433			-1.48454	-1.11052	-2.15419	-0.351814	-1.1738	-3.27289	-2.38777	1.54575	-0.135987	-1.55714	-2.62473	-2.34905
nw>contig10598|size74|read17|cov10.00_7304	H-probe	-1.41838	1.044	-1.0787	0.414983	-4.39823	-3.0568	-1.17605	-3.21934	-0.875127	-6.5643	1.64123	-4.84242	-2.09473	-1.04391	-1.45859	-0.91795	-3.15312	-3.91897	-0.488703	-1.10172	-0.853644	-1.69665	2.55244		2.34141	2.29947	1.1656	1.69625	-1.87651	-3.36232	-0.531253	-0.93988		0.97994			-1.27633	-0.46246	-1.67309	-1.57079	-4.39193	-4.1983	-2.27665	0.144941	-1.25778	-0.710735	-2.6747	-0.923207
nw>contig10604|size76|read30|cov19.08_0308	H-probe	2.46736	2.37615	-1.04842	-0.198075	-1.66982	0.379441	1.06163	-0.48626	-1.01758	-1.40461	2.28778	-2.40613	0.35058	-0.191419	-0.536957	-0.651447	-0.46426	-1.45887	0.514671	-0.969099	-1.36848	-0.388064	2.9246		5.49254	4.60698	1.62882	1.64576	2.27986	0.449281	3.13767	2.44103		1.83897			0.657019	0.960767	-2.01638	-1.85756	-1.03261	-0.758098	-1.07408	1.20631	-0.74163	-0.821429	0.217038	-0.042912
nw>contig10605|size247|read137|cov20.87_2850	H-probe	0	-0.284931	0	-0.479388	0	0	0	0	0	0	0	-0.422548	0	-0.284931	0	-0.479388	1.29161	0	0	0	0	0	0		0	-0.284931	0.673517	-0.479388	0	0	0	0		0			0	-0.284931	0.626611	-0.479388	0	0	0	0.395779	0	0	0	-0.422548
nw>contig10605|size72|read18|cov12.08_5309	H-probe	-1.05095	-1.93964	-1.57818	-0.830207	-1.88441	-2.34959	-2.08473	2.47055	0.66367	-1.11988	-3.21178	-0.569742	0.431306	0.554612	-1.36241	-0.215389	-2.02282	-0.0388523	-1.998	0.488887	-0.493625	-2.56239	-3.13925		3.83395	2.29719	1.72216	3.13999	1.9404	2.43269	0.453494	5.45381		1.32088			0.141747	-1.08673	-2.54504	0.152608	-1.98953	-2.77104	-2.71968	3.27173	0.0450442	-1.32007	-2.65178	-1.41778
nw>contig10608|size148|read72|cov22.55_87311	H-probe	-1.33857	-2.54581	-0.113245	-1.98943	0.778772	-0.922042	-1.40743	0.709081	-1.86306	-0.897016	-1.64365	-1.01498	1.52733	-1.37348	0.790939	-1.97429	0	1.34854	0.585188	0.573217	-0.879746	-0.897016	-1.64365		3.24794	1.62532	3.0388	1.26443	4.72686	2.97833	1.91699	2.7511		1.81323			0.30366	-1.72143	0.181491	-0.833361	0.734246	-0.0452252	-0.127381	-0.293601	0.283346	1.48899	-0.747691	0.540568
nw>contig10609|size214|read44|cov9.61_70312	H-probe	1.44127	-1.0436	0.138807	0.0161164	0	0.84832	-0.260777	0	-0.93209	0.803474	-1.12948	0	0	0.616774	-0.903337	-1.27948	1.29161	1.67643	1.31762	0	-0.93209	-0.84003	-1.12948		2.04958	2.20208	1.89359	1.72689	3.67358	2.47711	1.44157	1.80415		1.87022			1.04316	-0.292414	-0.276726	-1.27948	0	1.34336	-0.260777	0.418751	-0.178958	0.200353	-0.23352	0
nw>contig1061|size97|read164|cov83.28_27318	H-probe	-1.5161	1.08897	-1.42916	0.281245	-4.6825	-3.19816	-1.20995	-3.70226	0.129917	-5.80767	-0.00600731	-4.3227	-2.13892	-0.800421	-1.90853	-0.863932	-3.13603	-4.26597	-0.747607	-1.26993	0.0478098	-1.51337	2.54651		2.27275	2.48122	0.951381	1.59886	-1.94516	-3.28343	-0.529127	-0.976488		0.932238			-1.38161	-0.149335	-1.94534	-1.33922	-4.36653	-4.37616	-2.1639	-0.123102	-0.617499	-0.844276	-2.10272	-0.588509
nw>contig10612|size105|read27|cov12.01_24315	H-probe	0	-0.298126	-0.521246	0	-2.13102	0.84832	-0.321848	-0.999629	-0.562343	-0.30955	0	-0.748964	1.6307	-1.08234	-0.521246	0	-2.13102	0	0.673232	-0.999629	-0.562343	-0.30955	0		2.37476	1.55497	1.46963	2.3844	-0.925191	0	-0.321848	-0.999629		0.76692			1.04316	-0.331148	-0.521246	1.27783	-2.13102	0.822693	-0.321848	-0.293601	0.190789	0.730832	0	-0.748964
nw>contig10613|size85|read14|cov8.36_17316	H-probe	-0.579498	0.369966	-1.53384	-0.413719	-4.52378	-2.95687	-1.09629	-1.903	-2.77505	-2.91783	0	-2.40466	-2.02077	-0.992537	-2.2458	-0.686131	-3.59764	-4.31671	-1.39796	-1.24574	-0.800151	-2.91783	0		2.99709	1.90495	0.933516	0.858442	-2.05991	-2.88661	-0.0947631	-1.42795		0.385359			-0.977609	-1.5861	-1.83055	-0.731288	-5.07129	-3.31937	-0.964865	-1.06433	-1.52962	-1.87745	0	-0.849111
nw>contig10619|size77|read21|cov13.68_14317	H-probe	0.490366	-1.91426	-0.784084	-2.71483	1.57697	0.628861	-0.755167	2.26363	-1.90768	-0.960276	-3.81789	0.0443348	-0.0273596	-0.061702	-0.792559	-2.72191	1.55598	3.44916	-0.876152	1.1284	-1.26731	-3.09455	-3.74429		3.70632	2.03883	2.26537	1.05364	5.30167	5.3563	1.55063	4.80444		0.782623			-0.474104	-1.46313	-1.53637	-1.752	1.14542	-0.0531368	-0.992747	2.70924	-1.00154	-2.07257	-3.1406	-2.62349
nw>contig1062|size83|read102|cov56.64_17324	H-probe	0.804421	-1.43763	-0.577051	0.189245	-2.39912	-1.25076	-1.74966	1.06178	1.47371	-2.43989	-2.85873	-1.83399	-0.155244	0.274613	-0.478644	-0.855942	-1.80873	-0.345533	-1.33419	-1.1578	0.08584	-2.68293	-2.78925		3.64683	2.4214	2.59245	3.34967	2.10258	2.57103	0.535926	4.65614		0.731535			-0.627205	-1.25453	-1.64383	0.13049	-1.60086	-2.00047	-2.32488	2.45676	0.935793	-2.67043	-1.85262	-1.55936
nw>contig10623|size440|read285|cov24.26_21251	H-probe	0	0.499281	-0.521246	0.0114329	-1.42768	-1.77036	0	0	1.19655	0	0	0	1.6307	-0.284931	-0.521246	0.539704	-0.136072	-1.77036	0	0	0	0	0		1.03325	0.920101	-0.521246	-0.00862473	-1.42768	-0.435445	0	0.698714		0			1.04316	-0.284931	0.105365	-0.777163	-1.42768	-1.77036	0	0.395779	0	0	0	0
nw>contig106236|size127|read22|cov8.81_2320	H-probe	-0.0344612	-1.95431	-1.48988	-0.698367	-1.70771	-2.64473	-2.30498	2.02521	1.05054	-1.87539	-3.59417	-1.05631	-0.521905	0.566692	-1.81307	-0.780434	-1.76205	-0.00623547	-2.46332	-0.354724	-0.65176	-2.91212	-4.16312		3.61007	2.45245	1.78912	3.30618	1.99396	2.38685	0.284482	5.02208		0.857958			-0.331554	-1.37058	-2.49309	-0.00240988	-2.03043	-2.39523	-2.44673	2.76101	0.527205	-1.86182	-3.10659	-1.24224
nw>contig10630|size88|read18|cov9.45_22325	H-probe	-0.386286	-1.9557	-1.90306	0.393454	-1.28382	-2.65414	-1.9475	1.00627	1.2529	-0.507081	-6.65833	-0.228103	-1.24181	0.540349	-1.74661	-0.599355	-2.01023	-1.16912	-1.88663	-0.21076	-0.60724	-1.25794	-6.65833		3.06412	2.20019	1.66156	3.22541	2.02744	2.10258	0.916442	4.36865		1.10238			-0.637935	-1.26205	-2.5735	-0.114325	-1.6682	-2.85253	-2.06231	1.71809	0.259815	-0.778118	-2.77337	-0.131627
nw>contig10634|size105|read34|cov15.88_36328	H-probe	-1.70138	0.886663	-1.47223	0.11713	-4.96994	-3.08351	-0.92056	-3.4754	-0.379653	-6.64159	2.35305	-4.47987	-2.54792	-1.07685	-2.52057	-1.09895	-3.17296	-4.58497	-0.441168	-1.04247	-0.36108	-1.57299	3.79101		2.15206	2.36849	0.741954	1.64221	-2.12568	-3.36014	-0.455837	-1.36889		1.1195			-1.30021	-0.394887	-1.83819	-1.93472	-4.42915	-4.3585	-2.18482	0.12356	-0.689202	-0.902657	-1.52592	-1.1077
nw>contig10636|size104|read27|cov12.97_15329	H-probe	-0.773966	-0.322358	-0.3254	-0.185409	-0.621591	0.347218	0.327586	-0.499094	-1.86272	-1.94714	-3.90714	-4.71435	-2.38525	-0.412683	-0.414444	-0.765833	-0.26328	-1.22388	1.06052	0.397298	-0.0924518	-0.656932	-0.296431		3.51864	3.22905	2.32901	2.91663	2.99787	2.61527	2.83955	3.53374		1.25647			-0.879114	-0.783205	-1.56064	-0.364876	-0.85793	-0.695399	-0.165809	1.89774	0.0859756	-1.21322	-1.75547	-2.42779
nw>contig10637|size138|read108|cov27.70_1152	H-probe	0	0	0	0	0	0	0	0	0	0	0	0	0	0	0.631622	0	0	0	0	0	0	0	0		0	0	0	0	0	0	0	0		0			0	0	0	0	0	0	0	0	0	0	0	0
nw>contig10638|size130|read23|cov8.83_18331	H-probe	-1.36075	1.46423	-1.76731	0.739497	-5.22972	-2.72832	-0.837303	-2.89268	0.155167	-4.86617	0.563803	-2.9944	-2.23132	-0.553389	-2.01385	-1.0134	-3.2056	-4.24996	-0.282159	-1.32316	-0.207792	-1.60194	3.33569		2.27773	2.79712	0.699567	1.68599	-1.60026	-3.67302	-0.509114	-0.825757		0.874733			-0.997601	0.0394882	-2.15137	-1.22509	-3.86698	-4.13766	-1.84057	-0.0760428	-0.562022	-1.33033	-2.08146	-1.07412
nw>contig1064|size318|read279|cov41.90_181335	H-probe	-1.33857	1.1957	1.04214	1.43602	0	-0.00431392	-0.321848	0	0.727809	-1.49544	0	-1.34461	0.292132	-1.21923	1.40486	-0.777163	1.962	-1.77036	0.673232	0	-0.468746	-1.49544	0		2.30677	0.63311	2.52598	1.15421	2.78243	-0.435445	2.13984	1.80415		1.44063			0.30366	-0.468037	0	-0.777163	0.734246	-0.427005	1.62561	1.17799	-0.468746	-0.455054	0	-1.34461
nw>contig10640|size231|read172|cov27.16_8753	H-probe	0	-0.304515	-0.579908	0	0	0	0	0	-0.698952	0	0	0	0	-0.304515	0.0517139	0	0	0	0	0	-0.698952	0	0		2.04958	1.54782	-0.579908	0.768538	0.72539	0	0	0		0			0	0.446675	-0.579908	0	0.734246	0	0	0.418751	0.0541799	0	0	0
nw>contig10643|size94|read43|cov21.62_27333	H-probe	0	-0.808701	-0.579908	-0.422651	-0.104901	1.37896	-0.534116	0.81248	0.379849	0.345563	-1.75515	-1.13705	1.03444	-0.810227	0.0517139	-1.71825	-0.0979114	2.43101	0.460964	0	0.16661	-0.698565	-1.75515		2.37476	1.92353	1.6122	1.0104	2.54931	3.34137	1.16824	1.80415		1.74384			0	-0.841723	1.51217	0.226421	-0.149427	0	-0.534116	0.724583	-0.816705	-0.698565	-1.75515	-1.13705
nw>contig10654|size88|read19|cov10.01_22337	H-probe	-0.15509	-2.13958	-1.50672	-0.733719	-1.66734	-2.36734	-2.29523	1.80512	1.26618	-2.04424	-3.2536	-1.3616	-0.248589	0.36601	-1.63462	-0.798478	-1.74721	-0.0123822	-2.39421	-0.674916	-0.635375	-3.50921	-4.27265		3.53771	2.2522	1.77857	3.14833	1.96942	2.22286	0.285205	4.79232		0.798885			-0.255277	-1.41407	-2.45951	-0.0498288	-1.99123	-2.57869	-2.29569	2.60259	0.617419	-1.80623	-3.04744	-1.62544
nw>contig10655|size70|read41|cov29.03_0338	H-probe	-0.955183	-1.75874	-1.10787	-0.55049	-1.62477	-2.53007	-1.72741	1.95695	1.18275	-1.50592	-2.60117	-0.824502	-0.729578	0.517056	-1.24213	-1.09825	-1.55141	0.0461525	-2.18841	-0.575758	-0.555934	-3.04542	-4.08302		2.84939	2.38937	2.06896	3.31251	1.94821	2.17756	0.601327	4.85019		0.82083			-0.83592	-1.27754	-2.05593	0.121825	-2.08031	-2.66588	-2.42455	2.64553	0.67519	-1.64249	-3.07117	-1.76073
nw>contig10666|size220|read41|cov8.74_138341	H-probe	0	-0.284931	-0.903337	-1.07581	-0.883673	0	0	0	0	-0.780699	0	-0.422548	0	-0.284931	-0.903337	-1.07581	-0.0979114	0	0	0	0	-0.780699	0		1.03325	2.01263	-0.22982	-1.07581	0.322154	0	0	0.698714		0.29577			1.04316	0.957739	-0.903337	-1.07581	-0.883673	0	0	0.706028	0	-0.780699	0	-0.422548
nw>contig10669|size86|read42|cov21.72_20342	H-probe	0.599066	-1.56057	-0.810763	0.0830828	-1.37247	-1.7817	-3.92074	2.53483	1.26759	-1.16274	-5.84872	-0.945574	0.355872	-0.349407	-1.21816	0.0396997	-1.61182	-1.06069	-2.78215	1.79213	-0.429871	-2.19101	-5.84872		4.06635	1.97484	2.1196	3.2779	2.58886	2.28479	0.833645	5.3904		1.22938			0.859802	-1.8474	-1.90116	0.127638	-1.58911	-1.51958	-2.95689	3.42078	1.29901	-1.65893	-2.86927	-1.10779
nw>contig10672|size108|read27|cov12.73_47344	H-probe	-1.39379	1.17658	-1.75018	0.0693419	-4.88367	-3.01673	-0.879527	-2.66104	-0.416655	-5.82048	0.974496	-5.52642	-2.29663	-0.685637	-2.58814	-1.1633	-3.20778	-4.34133	-0.450828	-1.28328	-0.358171	-1.63717	3.2549		2.27023	2.58622	0.422968	1.42389	-2.01739	-3.5961	-0.691939	-0.742425		0.870704			-1.10813	-0.0449277	-2.14995	-1.82111	-4.49023	-4.20648	-2.17583	0.139754	-0.628819	-1.07469	-2.23184	-1.29072
nw>contig10674|size206|read47|cov10.97_134345	H-probe	0	0.276789	-0.521246	0.388489	0	0	0	0	0	-0.698565	0	-0.894544	0	-0.507423	0.110377	-0.400107	0.785761	0	0.99508	1.57285	0	0.507712	3.61071		1.03325	0.697609	0.609628	1.2371	0	1.33492	1.70235	0		-0.698565			0	-0.507423	0.105365	-0.400107	0.734246	0	0	0.395779	0.753132	-0.698565	0	-0.894544
nw>contig10676|size94|read26|cov12.66_27346	H-probe	0.102703	1.66562	-1.46577	0.271729	-0.54004	2.72308	1.5809	0	-0.698952	-0.150433	0	0.65577	-1.33857	-0.539388	-1.00953	-1.02387	-1.82179	2.1025	0.432093	0	0.284363	0.0117167	0		4.42638	4.35394	1.14282	1.85032	1.21151	2.47711	1.8987	1.52063		0.918676			0.725698	0.211802	-1.01693	-1.02387	-1.82179	0	-0.562987	1.19139	0.0541799	-1.19456	0	-1.02677
nw>contig10679|size122|read23|cov9.34_25347	H-probe	0.102703	1.33877	-1.03682	0.0114329	-2.88024	-1.72218	-3.12893	-1.52565	-0.0716071	-1.84263	0	-1.83207	-1.33857	-1.07616	-2.07896	-0.777163	-2.87039	-5.01561	-2.13385	0.0471935	-0.794558	-0.636352	3.61071		2.81085	1.83594	0.447017	1.39843	-2.06886	-3.68069	-0.172329	-1.52565		0.86762			0.725698	0.824071	-2.07896	-0.777163	-2.94349	-2.73955	-3.12893	-0.347662	-2.35723	-0.204071	0	-0.276524
nw>contig10686|size80|read14|cov8.93_8349	H-probe	0	-0.419911	0.613195	-0.400107	0	1.37896	0	0	-0.361446	0	0	-1.02677	0	-1.20412	0	-0.400107	0.785761	1.06914	0	0	-0.361446	0	0		2.37476	0.648215	2.36868	1.2371	2.29868	0	2.46169	1.80415		0			0	-1.20412	0.626611	0.37589	0	0	0	0.724583	-0.361446	0	0	-1.02677
nw>contig10694|size78|read42|cov25.37_11351	H-probe	-0.223468	-1.73215	-1.54833	-0.430595	-1.50932	-1.96603	-1.75069	2.58104	1.20144	-1.29764	-2.62607	-0.182653	-0.704961	0.460866	-1.71705	-0.694982	-1.98303	-0.216936	-1.80539	-0.0212519	-0.582164	-2.6179	-4.7758		3.71149	2.49815	1.79404	3.06618	2.17998	2.22853	0.460569	5.48194		1.37821			0.0371164	-1.0901	-2.15304	-0.0638869	-1.93123	-2.24946	-2.66458	3.20669	0.368388	-1.73863	-2.64472	-1.30034
nw>contig10696|size184|read86|cov21.73_3352	H-probe	-1.6706	1.05554	-0.811108	0.453456	0.226304	2.72308	1.23809	0	-1.6575	-1.02106	0	-1.44257	-1.48117	-0.922467	-1.00148	-0.955982	-0.136072	1.06914	1.40826	0.990922	0.637641	-1.02106	0		2.93014	3.77807	1.88293	2.83822	2.38656	2.82587	0.79656	3.68236		2.43572			-0.037163	0.987597	-0.586226	-0.110282	0.152749	1.72514	-0.905792	1.95721	-0.904366	0.0193236	0	-1.44257
nw>contig107|size80|read121|cov76.35_20399	H-probe	-1.71356	1.12392	-1.09609	0.261087	-4.50524	-2.89642	-0.898415	-2.37402	0.16374	-5.69321	1.90313	-3.59605	-2.00581	-0.817858	-1.18388	-1.08041	-3.06714	-3.87941	-0.622639	-0.886951	-0.311326	-1.43746	3.55556		2.04091	2.53189	1.20029	1.58757	-1.66121	-2.96211	-0.355101	-0.293069		1.03163			-1.28226	-0.0417881	-1.58213	-1.64206	-4.18245	-4.15176	-1.95601	0.239552	-0.471327	-0.878322	-1.18189	-0.394318
nw>contig1070|size111|read121|cov52.14_0356	H-probe	-1.57664	0.991732	-1.54819	0.0769345	-4.82849	-3.14969	-0.98799	-3.54085	-0.458204	-6.2859	1.58891	-4.55375	-2.11829	-0.997088	-1.97104	-1.11887	-3.14629	-4.23057	-0.486737	-1.52955	-0.560044	-1.50671	2.81634		2.15867	2.35871	0.754705	1.47724	-2.00029	-3.35274	-0.415086	-1.26483		1.04483			-1.29454	-0.332189	-1.95625	-1.73987	-4.43333	-4.26078	-2.24097	-0.293893	-0.849085	-0.868738	-1.92582	-0.711461
nw>contig10702|size99|read22|cov9.99_30354	H-probe	0	-0.157087	-1.42451	-1.45792	-0.104901	0.84832	0	-0.91049	-0.361446	-1.36235	0	-1.34461	1.03444	-0.663825	0.0652346	-1.45792	-0.0979114	0	1.5784	-0.91049	1.20123	-1.36235	0		2.37476	0.118178	-0.0468287	0.179286	0.322154	0	0	-0.91049		-1.36235			1.64223	-0.20384	-1.41109	-1.45792	-0.149427	0	0	-0.51471	-0.361446	0.276204	0.895964	-1.34461
nw>contig10710|size89|read62|cov25.42_2254	H-probe	-1.33857	0.582549	-1.92214	-0.669324	-0.883673	2.07094	-0.58483	0	-0.93209	-0.391157	0	-1.2496	0.292132	-0.706874	-0.51728	-1.45792	0.407933	0	-0.58483	0	-0.93209	-0.391157	0		0.290555	1.38518	-0.791265	0.717673	0.96968	2.47711	-0.58483	1.16743		2.05125			-0.295407	-0.706874	-0.860108	-1.45792	-0.883673	0.822693	0.695216	0	-0.178958	0.649226	0	-1.2496
nw>contig10711|size113|read34|cov14.78_34357	H-probe	1.44127	-0.784611	-1.47392	-0.651145	-0.849267	-0.970683	-0.807184	0.81248	-1.07038	-1.85981	0	-1.13705	2.05135	1.02628	-1.26014	-0.252144	-1.34526	-1.97249	1.18543	0	-1.07038	-1.85981	0		4.23209	2.43229	-0.3149	1.18072	1.30197	0.0648974	2.14942	2.42261		1.59697			1.04316	1.12393	-2.47465	-0.297301	-0.0207759	-1.69827	0.472861	1.54351	1.07602	-0.819429	0	-1.13705
nw>contig10712|size107|read19|cov8.31_3358	H-probe	0	0.223702	-1.28609	0.582595	-0.883673	0.84832	0	0	-0.860191	0	0	-0.602865	0	-0.283036	-1.89929	-0.713002	1.53425	1.06914	0.99508	0	-0.860191	0	0		1.62912	1.02634	0.292826	2.01565	1.59489	1.33492	1.70235	1.16743		1.07647			1.04316	0.176948	-1.27267	-0.713002	-0.149427	0	1.28005	0.706028	-0.107059	1.04038	0	-0.602865
nw>contig10713|size97|read71|cov27.01_1955	H-probe	0	0	-0.521246	0	0	1.37896	0	0	0	-0.391157	0	0	0	0	-0.521246	0	0	0	0	0	0	-0.391157	0		0	0	-0.521246	0	0	0	0	0.698714		-0.391157			0	0	-0.521246	0	0.734246	0	0	0	0	-0.391157	0	0
nw>contig10714|size112|read20|cov8.71_39359	H-probe	1.44127	0.252386	0	-0.713002	0	-1.77036	0	0	1.19655	0	0	-1.01498	0	-0.531826	1.90556	0.0907396	0	-1.77036	0	0	0	0	0		1.03325	0.673206	1.47761	1.21837	0	-0.435445	1.70235	1.16743		0			0	0.710845	0	0.0629955	0	-0.947668	0	0	0	0	0	-1.01498
nw>contig10716|size122|read27|cov10.98_1360	H-probe	-1.25574	0.662939	-2.00591	-0.46048	-4.79895	-2.80036	-0.789818	-2.22248	-0.0595669	-4.62373	-0.000448328	-3.63366	-1.74433	-1.35954	-2.01105	-1.70222	-3.03109	-4.0033	-0.368668	-0.968888	-0.517156	-1.68295	1.36858		2.44751	2.16546	0.452232	0.871481	-1.45725	-3.35581	-0.11529	-0.172209		0.784522			-1.03513	-0.431408	-2.3748	-2.29013	-3.89109	-4.22246	-1.76658	0.443723	-0.571475	-1.143	-2.28765	-0.649499
nw>contig10724|size97|read20|cov8.85_35362	H-probe	-1.08817	0.757797	-1.71511	-0.0934912	-4.54421	-2.69505	-0.780465	-2.49896	-0.713868	-6.09496	1.68316	-3.00805	-1.78464	-1.28507	-1.86785	-1.65297	-2.89062	-4.19282	-0.545555	-1.54412	-0.824846	-1.5919	2.72457		2.57411	2.10495	0.84934	1.23067	-1.48394	-3.39927	-0.492939	-0.286216		0.910281			-1.03785	-0.401129	-2.01188	-2.1068	-3.8079	-3.868	-1.9404	0.0456465	-0.886237	-0.931242	-0.170605	-1.05257
nw>contig10727|size82|read15|cov9.17_21364	H-probe	0.036805	-2.00272	-1.46533	-0.758519	-1.70208	-2.47682	-2.33677	2.1137	1.10984	-1.95316	-3.40362	-1.15558	-0.403599	0.554373	-1.72385	-0.863899	-1.77112	0.0573197	-2.46128	-0.355014	-0.619187	-3.13172	-4.30374		3.66066	2.42963	1.81613	3.24077	1.96094	2.37372	0.235026	5.12556		0.836864			-0.235596	-1.30746	-2.43197	-0.0496915	-2.06221	-2.3307	-2.39117	2.8679	0.549103	-1.90806	-3.12629	-1.18287
nw>contig10729|size74|read14|cov8.54_3365	H-probe	-1.40608	1.16816	-1.14465	0.0705676	-2.989	-0.725249	1.25353	-2.77673	-0.475005	-4.47583	0	-4.7495	-1.16002	-0.63272	-1.39656	-1.95006	-1.01942	-2.31001	1.81658	-1.01941	0.569756	-1.83667	0		3.31554	3.01691	1.5803	2.04852	0.630655	-1.49454	1.74766	-0.615854		0.756554			-0.488946	0.202167	-1.40974	-2.24666	-2.04445	-1.74986	0.285458	0.437514	-0.126213	-0.943793	0	-1.98007
nw>contig1073|size131|read148|cov56.27_2369	H-probe	-1.53062	1.10468	-1.64429	0.464209	-4.86889	-2.83711	-0.94172	-3.21694	-0.333204	-5.08841	1.58934	-3.44346	-2.22706	-0.929224	-1.77976	-0.780152	-3.14562	-4.13506	-0.561399	-1.55356	-0.431404	-1.25352	2.7533		2.26908	2.44908	0.810911	1.61785	-1.6927	-3.39921	-0.338601	-1.20945		1.0812			-1.32794	-0.174316	-2.01191	-1.54446	-4.3143	-4.22578	-2.00176	-0.25354	-0.752397	-0.880555	-1.77156	-0.880974
nw>contig10737|size108|read21|cov8.44_0368	H-probe	-3.54881	1.54244	-0.417597	-0.271129	-3.16291	-1.46852	-0.262002	-0.999629	-0.0297104	-1.84263	0	-2.03414	-2.51437	0.915004	-0.653623	-0.921272	-1.34046	-3.43564	1.09875	-0.00870661	-0.340434	-0.636352	0		1.80069	3.54669	1.75802	1.29207	-0.268097	-0.961502	1.62425	0.804519		1.28864			-1.15843	1.03467	-0.163307	-2.23814	-2.72318	-1.83102	1.32528	1.46628	0.220255	-0.802247	0	-0.478594
nw>contig1074|size103|read288|cov117.89_34376	H-probe	-0.441878	-1.36927	-1.20916	-0.54673	-1.77068	-2.77909	-2.16238	0.579555	0.792114	-1.62318	-2.37211	-2.62402	-0.297293	0.301031	-1.04659	-0.809568	-1.88761	-1.09085	-2.53687	-0.595738	-0.456854	-1.94437	-2.29851		3.64195	2.24272	1.87578	2.70149	1.91872	1.52496	0.795893	4.10269		1.31887			-0.768075	-1.17631	-2.27481	-0.203213	-2.31795	-2.37387	-2.14655	1.95908	-0.33153	-1.21323	-2.76338	-1.01134
nw>contig10740|size132|read41|cov15.20_35370	H-probe	-1.96122	1.45068	-1.32351	0.430764	-6.59234	-2.71567	-0.676603	-2.56545	0.71986	-3.21079	0	-2.90025	-2.95035	-1.89612	-1.99163	-0.0975614	-2.85812	-4.7316	-0.719075	-1.80509	-0.643469	-3.21079	0		1.31645	2.66925	0.902625	1.57486	-2.27424	-3.01297	-1.21295	-2.2105		1.01741			-1.70048	0.217762	-1.18245	-1.06099	-4.72282	-3.80866	-4.16955	0.108328	0.034908	-0.559135	0.895964	-0.130823
nw>contig10742|size80|read16|cov10.20_5372	H-probe	-1.71244	0.647732	-1.24783	-0.0796942	-4.11126	-2.96084	-1.71152	-2.42736	-0.761431	-5.11273	1.25839	-2.90404	-1.91799	-1.04184	-0.991932	-1.16665	-3.03499	-3.53035	-0.852078	-1.16488	-1.19868	-1.61918	1.89521		2.14569	2.11486	1.1103	1.06958	-1.8059	-3.20692	-1.12666	-0.549086		0.861389			-1.29644	-0.527668	-1.78962	-2.12146	-4.21749	-4.16554	-2.14662	0.0830547	-1.44976	-1.03514	-2.32354	-0.387175
nw>contig10749|size76|read33|cov19.68_4375	H-probe	-0.68337	-1.64132	-0.528288	-0.939566	-0.477037	0.552148	1.06407	1.3291	0.300809	-1.44474	1.25839	-2.6992	-1.79663	-0.696957	0.107848	-0.665311	-0.465623	0.928058	0.0860156	0	0.0875694	-0.634939	-3.2195		2.7879	2.31583	2.40614	2.18371	3.10116	3.13314	1.95395	3.93831		1.45742			-1.18884	-1.06894	-1.195	-1.62874	0.185465	0.718212	0.495414	2.06269	0.716061	-0.428709	-0.812347	-2.6992
nw>contig10758|size1029|read664|cov24.11_21358	H-probe	0	0.784212	-0.948562	-0.479388	0	0.84832	-0.481555	0	-1.33992	-0.391157	0	0	0	0	-0.948562	-0.479388	1.29161	0	-0.481555	0	-1.33992	-0.391157	0		0	1.85234	-0.275045	-0.479388	0.72539	0	1.2208	0		0.685313			0	1.24267	-0.948562	-0.479388	0.734246	0	-0.481555	0	-0.586783	-0.391157	0	0
nw>contig1076|size113|read150|cov65.68_7384	H-probe	-1.42822	1.1812	-1.7494	0.133398	-4.90484	-3.02341	-0.898485	-2.82845	-0.349975	-6.17663	0.715904	-5.94829	-2.38722	-0.695775	-2.55389	-1.12506	-3.2011	-4.33452	-0.454717	-1.32149	-0.310911	-1.70841	3.2026		2.18513	2.56466	0.451169	1.46802	-2.00724	-3.61968	-0.667359	-0.835132		0.89724			-1.11104	-0.0427778	-2.11717	-1.83617	-4.51213	-4.21534	-2.23083	0.0694088	-0.571593	-1.01378	-2.23184	-1.37818
nw>contig10761|size158|read47|cov14.44_75380	H-probe	-1.05095	-1.21705	-1.16334	-0.582792	-1.87094	-2.93106	-1.95077	1.52859	1.14204	-1.19152	-6.66809	-0.706433	-2.99148	0.331721	-1.15432	-0.844632	-1.42943	-0.734065	-2.07175	-0.74428	-0.00388046	-2.58506	-1.55338		3.23906	2.4949	2.20392	2.81347	2.2566	1.89227	0.631167	4.37864		1.0642			-0.627205	-0.997958	-2.05475	-0.0935203	-1.65755	-2.08593	-2.38904	2.56352	0.990292	-1.56308	-2.48087	-1.12112
nw>contig10764|size72|read19|cov11.92_0381	H-probe	2.1477	0.54062	-2.04293	-0.614776	-2.60179	-0.6891	-0.534116	-2.25046	-1.67806	-1.27081	0	-1.62055	1.6307	-0.881698	-0.984919	-1.10663	-0.639795	-2.34304	1.77993	-2.25046	0.617075	-1.27081	0		2.86389	0.187953	-1.31513	-0.643085	0.180644	-1.39597	1.16824	-1.08303		2.18597			2.88057	0.478324	-3.05721	-1.91037	-0.732271	-1.68705	0.745929	0.0152664	-0.0662569	-1.27081	0.895964	-0.0649977
nw>contig10766|size80|read17|cov10.80_9382	H-probe	-1.85102	0.411864	-1.71016	-0.12385	-4.23789	-2.99734	-1.38432	-3.14221	-1.26057	-5.8509	0.737051	-4.81173	-2.43737	-1.45664	-1.13815	-1.85676	-3.04502	-4.03989	-0.903324	-1.68429	-1.47781	-2.07818	2.19943		2.1476	1.91074	0.780753	0.917288	-1.73605	-3.17536	-1.09253	-0.991048		0.465641			-1.159	-0.795398	-2.10548	-1.75997	-4.21928	-4.20581	-2.5822	-0.136531	-1.80843	-0.954946	-1.67993	-1.21739
nw>contig10767|size87|read25|cov12.72_1383	H-probe	0.102041	-2.14619	-0.51583	-1.76242	1.38855	0.515903	1.24619	1.87218	-0.847206	-1.70292	-2.48031	-0.32569	-0.527073	-0.314724	-0.429991	-1.91902	1.23316	1.51782	0.0101738	0.383936	-0.625933	-2.52868	-4.63005		3.51224	2.38222	2.67047	1.8418	5.01911	4.33875	2.69046	4.42418		1.39466			-0.695602	-1.55667	-1.8132	-1.35132	1.1106	-0.00523821	0.773846	2.31897	-0.31918	-2.34032	-2.69772	-3.86391
nw>contig10771|size84|read35|cov19.42_8385	H-probe	-2.02077	-2.39016	-1.27335	-0.909232	-1.30341	-2.85843	-1.46063	1.12823	0.224081	-0.914923	-5.72274	-0.380227	-0.390069	0.249189	-2.24666	-1.4426	-1.19734	0.00254098	-2.08373	-1.52565	-1.1292	-1.77434	-5.72274		2.28951	1.64495	1.48547	2.21322	1.24304	1.40167	-0.00765442	4.15994		-0.270369			0.635426	-1.91032	-2.48512	-0.720289	-2.4489	-2.36339	-4.07634	2.11707	-1.85866	-0.59461	-2.7433	-3.31187
nw>contig10772|size134|read38|cov13.99_16386	H-probe	-1.0408	1.15825	-1.30303	0.929166	-3.77533	-1.76526	-0.842659	-1.68271	0.96528	-3.69998	0	-3.22938	-1.44764	-0.962286	-1.1628	-0.802539	-3.20632	-3.19218	-0.644261	-0.922343	-0.0967714	-1.40067	0		3.55993	2.49292	1.07049	2.51985	-1.10751	-2.1997	-0.475054	-0.454197		0.689559			0.398497	-0.588043	-2.01691	-2.11941	-4.10064	-3.421	-1.93359	0.311633	-0.047637	-0.630039	0.895964	-0.942816
nw>contig10773|size96|read36|cov17.95_0387	H-probe	-0.573838	-2.65639	-1.73093	-0.555216	1.68011	-0.914987	1.48898	1.68985	-0.378827	-0.958647	-2.78182	-4.16609	-1.91811	-0.936467	-0.958196	-0.911225	1.42513	-0.12565	0.401733	0.248467	-1.32454	-1.01538	-2.71234		3.2578	1.59427	1.49518	1.85467	4.2247	2.00072	2.40517	3.82398		0.36908			-0.892612	-1.13145	-1.69676	-0.0646237	1.30863	-1.27748	0.410594	1.56053	-0.572576	-1.1181	-2.35639	-2.61054
nw>contig10775|size512|read359|cov26.06_19160	H-probe	0	1.95925	-0.521246	0	0	0	0	0	0	-0.391157	0	0	0	1.28727	-0.521246	0	0.785761	0	0	0.990922	0.983315	-0.391157	0		0	0.724835	0.152271	0	0.72539	0	0	0		0.685313			2.06426	1.90023	0.874805	0	0.734246	0	0	0.724583	0	0.649226	0	0
nw>contig10778|size90|read17|cov8.60_17389	H-probe	-1.0408	-1.30065	-1.64207	-1.22845	0.0188405	0.346443	0.681781	0.515735	-2.07779	-1.75964	-1.43454	-0.581852	-0.105433	-0.60305	-0.757625	-0.791631	0.657125	1.67326	1.08653	-0.718002	-0.490341	-2.94526	-2.86494		3.16729	2.01566	2.04173	1.91967	4.20527	3.93906	3.38138	3.09858		0.899715			1.18105	-1.27634	-1.31744	-0.942671	0.667381	-0.0531368	1.37006	1.48263	-0.713684	-1.27563	-2.67731	-1.59391
nw>contig1078|size94|read107|cov55.45_32396	H-probe	-1.32446	0.799458	-1.92348	-0.210209	-4.8622	-3.07584	-0.974829	-2.52572	-0.827116	-5.5898	1.63522	-5.4066	-2.25586	-0.990463	-2.46048	-1.54294	-3.2592	-4.27943	-0.559225	-1.15643	-1.09429	-1.53217	3.10177		2.11884	2.30442	0.323298	0.970538	-2.05277	-3.54738	-0.736345	-0.483256		0.889266			-1.26782	-0.335892	-2.2661	-2.26577	-4.4982	-4.21523	-2.2381	0.217951	-1.2988	-1.1336	-1.74603	-1.05746
nw>contig10782|size429|read234|cov20.16_6761	H-probe	-2.02077	0	0	0	0	0	-0.58483	0	0	0	0	0	-2.02077	0	0	0	0	0	-0.58483	0.990922	0	0	0		-0.987523	0.724835	1.75695	0.768538	0	1.33492	-0.58483	0		0			-2.02077	0.75119	0	0	0	0	-0.58483	0.395779	0	0	0	0
nw>contig10782|size71|read44|cov26.80_11391	H-probe	0.0543273	-2.00907	-1.23808	-0.942115	-1.71484	-2.57761	-2.57167	2.03982	0.65885	-2.22544	-3.01767	-1.19636	-0.363113	0.345599	-1.55926	-0.653348	-1.76006	0.378549	-2.6647	-1.03781	-1.03491	-3.28775	-4.56566		3.6073	2.38452	2.03768	3.07379	1.76782	2.42195	0.0787406	4.89964		0.775344			-0.264904	-1.31575	-2.14872	-0.227332	-1.92402	-2.58476	-2.45026	2.74663	0.406235	-2.23263	-3.12766	-1.66778
nw>contig10784|size115|read26|cov10.21_23392	H-probe	-1.33857	-0.304515	0	0	-0.883673	0.84832	1.11631	0	0	0	0	0	-1.33857	-0.304515	0	0	-0.883673	0	-0.321848	0	0	0	0		-1.33857	0.900517	0.673517	0	-0.883673	0	-0.321848	0		0			-1.33857	0.446675	0	0	-0.883673	0	-0.321848	0	0	0	0	0
nw>contig10786|size311|read72|cov11.22_231393	H-probe	-1.0408	1.13487	-0.725083	-0.235272	-1.82179	-0.391403	-1.1697	0	0	-1.19456	0	-1.13705	-0.43072	-1.46327	-0.96111	1.2174	-1.82179	-1.77036	-1.1697	0	0	0.0117167	0		1.27916	0.834294	-1.69245	1.15173	0.271342	-1.77036	-1.1697	2.04099		0.491487			-0.417809	0.145322	-0.698878	0.625573	-1.08755	-1.77036	-1.1697	0.961223	0.753132	-1.19456	0	-1.13705
nw>contig10789|size90|read41|cov21.80_9395	H-probe	0	0.0948101	-0.826556	0.0161164	-2.60179	-2.54171	0.30207	-0.91049	-0.857709	-1.33804	-1.75515	-2.14389	0	-1.53743	-0.790621	-0.475739	-0.639795	-0.86528	-0.141011	0.0804323	-1.07095	-0.13176	-1.75515		5.06373	2.36936	1.76895	2.06337	1.07179	0.284164	1.3256	1.51212		-0.261568			1.64223	-1.07744	-1.84083	-0.503483	-1.38329	-1.71902	-1.13609	0.280902	-1.30113	-1.33804	-1.75515	-2.14389
nw>contig10799|size128|read35|cov13.15_42398	H-probe	2.1477	-0.531826	0.0919493	-0.713002	0	2.07094	1.43816	0	1.19655	-1.14837	0	-0.602865	1.6307	-0.531826	0.110377	-0.713002	0	1.06914	0	0	0.983315	0.057911	0		2.63995	1.03286	1.84744	1.21837	0.72539	0	0	1.16743		-1.14837			0	-0.531826	0.105365	0.0629955	0.734246	0.822693	1.28005	0.961223	0	-1.14837	0.895964	-0.602865
nw>contig10801|size78|read27|cov16.37_18401	H-probe	-0.964169	-2.23037	-1.30428	-0.50228	-1.97342	-1.64613	-1.70592	1.88213	0.655616	-1.21184	-1.57032	-0.0335136	-1.06051	0.498876	-1.35883	-0.626548	-1.61086	0.621199	-2.28999	0.659508	-0.0446652	-4.2882	-2.46506		3.66751	2.25475	1.72314	3.19822	1.89599	3.39711	-0.0166607	5.01155		0.663173			-0.455671	-1.18572	-2.04458	0.253451	-2.07397	-1.38545	-3.33846	2.57255	-0.393282	-2.22805	-3.21714	-0.837718
nw>contig10803|size111|read23|cov10.04_28402	H-probe	0	-0.679058	1.04214	0.0755939	0	0.84832	-0.534116	0	0	0	0	-0.422548	0	-1.46327	0	-0.713002	0	0	1.04428	0	0	0	0		2.37476	0.389067	3.02494	2.41446	2.47857	0	1.16824	1.52063		1.07647			1.04316	-1.46327	1.06203	0.564832	0	0	-0.534116	0.706028	0	0	0	-0.422548
nw>contig10805|size94|read18|cov9.77_8403	H-probe	-1.59688	1.04901	-1.17053	0.251578	-4.37653	-2.92803	-1.17081	-2.5757	-0.163423	-6.22487	1.46439	-3.78357	-1.777	-0.792795	-0.98987	-1.26276	-2.87517	-3.75985	-0.697157	-1.10382	-0.665837	-1.58616	2.8483		2.26692	2.56359	1.20143	1.4538	-1.55048	-2.95485	-0.431041	-0.363624		0.78305			-1.08041	-0.0212814	-1.61893	-1.52023	-4.17672	-4.17556	-2.10041	0.219409	-0.760258	-1.06169	-1.29033	-0.418173
nw>contig1081|size237|read603|cov119.24_11410	H-probe	0.870393	-0.385875	-0.499316	-0.4925	0.426194	1.83911	1.16133	1.29193	-0.21276	-1.33626	-2.97742	-2.49452	2.55727	0.13187	-0.070113	-0.676849	1.13243	1.15356	1.06718	0.460709	0.502783	-1.77348	-2.97742		2.7879	1.89035	2.22104	1.97888	3.18553	3.62574	3.02763	3.3029		1.74838			1.89455	0.932487	0.504678	0.240964	0.851452	1.21484	0.931453	1.74478	-0.150533	-1.93938	-2.97742	-2.49452
nw>contig10813|size74|read22|cov14.41_0404	H-probe	-1.08881	0.637105	-2.00742	-0.593912	-4.84834	-2.8444	-0.82777	-2.44213	-0.139288	-5.04497	0.126761	-3.79959	-1.66261	-1.34257	-2.01424	-1.88017	-3.06868	-4.04209	-0.38508	-1.08282	-0.527455	-1.72016	1.4575		2.48429	2.18455	0.410931	0.776884	-1.44026	-3.38294	-0.190853	-0.352967		0.777183			-1.07065	-0.411071	-2.36799	-2.36509	-3.8628	-4.23252	-1.90088	0.24489	-0.553259	-1.17693	-1.97047	-0.577901
nw>contig10815|size97|read22|cov11.35_20406	H-probe	-0.579498	-0.702968	-0.58463	-0.707952	-0.648905	-3.70675	0.595398	-0.91049	1.18879	-2.07838	-1.12948	-2.304	-2.02077	-0.705459	-1.38238	-0.692806	0.237718	-2.63761	0.765561	-0.91049	0.465836	-2.07838	-1.12948		2.36368	2.35967	1.42435	2.60624	2.09005	-0.600225	0.153864	1.33389		-0.392338			-0.977609	0.83551	-1.38979	0.448121	-0.693431	-2.88406	-0.268442	0.490931	-0.343704	-1.038	-1.12948	-2.304
nw>contig10816|size128|read23|cov8.93_5407	H-probe	-1.51629	1.01381	-1.61772	0.332934	-4.83044	-2.85767	-0.930959	-3.22534	-0.526521	-5.37485	1.7371	-3.34212	-2.26609	-1.01621	-1.71604	-0.859791	-3.14272	-4.07773	-0.524488	-1.49416	-0.580544	-1.18164	2.57994		2.20347	2.34365	0.829128	1.49942	-1.72451	-3.37153	-0.300589	-1.18998		1.13706			-1.34491	-0.238606	-2.01187	-1.63292	-4.31835	-4.23184	-1.94932	-0.24629	-0.893943	-0.795928	-1.51614	-0.701333
nw>contig1082|size73|read97|cov67.16_5413	H-probe	-1.55267	0.96196	-1.5597	0.120842	-4.76109	-3.16137	-1.06795	-3.56015	-0.568389	-6.41929	1.43777	-4.64849	-2.15859	-1.03578	-1.92611	-1.08309	-3.11791	-4.2058	-0.525034	-1.56472	-0.676134	-1.49367	2.72934		2.18799	2.31608	0.752661	1.4929	-1.99641	-3.37483	-0.471981	-1.2999		1.0146			-1.29298	-0.373874	-1.94946	-1.70193	-4.43603	-4.27387	-2.28689	-0.340784	-0.978959	-0.852557	-1.96234	-0.721316
nw>contig10828|size160|read61|cov18.59_14412	H-probe	0	0	0	0	0	0	0	0	0	0	0	0	0	0	0	0	0	0	0	0	0	0	0		0	0	0	0	0	0	0	0		0			0	0	0	0	0	0	0	0	0	0	0	0
nw>contig10839|size114|read30|cov12.80_20415	H-probe	0	0.395507	-1.45458	0.388489	-1.82179	1.37896	0	0.81248	-1.16778	0	0	-1.13705	0	-0.893917	-1.45458	-0.400107	-1.82179	0	0.99508	0	-1.16778	0	0		0	0.311116	0.302365	0.86718	-0.615964	0	0	0.698714		1.07647			1.04316	0.714676	-1.45458	-0.400107	-1.08755	0	1.28005	0.418751	-1.16778	0	0	0.418496
nw>contig10841|size85|read16|cov9.33_12416	H-probe	0.150617	-1.85051	-1.43146	-0.373336	-1.55464	-1.79516	-0.979067	2.49284	1.36569	-1.55964	-1.35571	-1.8143	-0.480918	0.292154	-1.16271	-0.679064	-1.23271	-1.00893	-1.32829	0.722908	-0.0232754	-0.923389	-6.39682		3.79527	2.37507	1.77601	3.16326	2.28948	2.08971	0.694277	5.75314		1.53765			0.190153	-1.70716	-2.65864	0.403867	-1.90364	-2.46891	-0.919311	3.37893	0.486439	-1.20089	-3.00872	-1.32676
nw>contig10844|size81|read17|cov10.09_4418	H-probe	-1.76401	1.21652	-1.0778	-0.26979	-3.35064	-0.745475	0.401478	-2.91213	-0.553381	-4.57584	-2.79473	-4.52216	-0.620454	-0.803341	-1.35179	-0.980068	-1.06216	-2.35522	1.33185	-1.08748	0.455334	-1.93669	-2.79473		3.11616	3.1915	1.50199	1.93196	0.198929	-2.56807	1.11856	-0.490502		0.739236			-0.0552034	0.107945	-1.12673	-3.5184	-2.01919	-1.4468	-0.114023	0.017293	-0.477303	-0.917684	-1.89877	-2.96661
nw>contig10851|size122|read27|cov10.30_53421	H-probe	-1.43672	0.755826	-1.98893	0.250376	-4.45076	-2.71686	-1.05673	-2.05887	0.230783	-4.60578	-0.431947	-2.8794	-1.87488	-1.33945	-1.60624	-0.960588	-2.94788	-4.05638	-0.702217	-1.02786	0.0387857	-1.38603	0.881733		2.20481	2.12123	0.489694	1.48535	-1.35222	-3.0763	-0.317299	-0.0331245		0.962972			-1.37798	-0.431009	-2.34369	-1.66645	-3.83417	-4.07936	-1.94321	0.162642	-0.141306	-0.936362	-2.54294	-0.657421
nw>contig10853|size86|read28|cov16.19_18422	H-probe	0	-2.08725	-1.66149	-1.32312	0.770309	0.84832	-0.763824	0.32947	-2.07066	-1.77958	-2.39208	-1.52602	0	-0.113869	-1.20525	-0.0062501	1.07832	2.1025	-0.763824	-0.999629	-2.07066	-1.77958	-2.39208		4.31028	1.58053	1.41452	2.94682	2.86195	3.10652	-0.763824	2.1862		-0.703107			0	-1.26286	-0.878632	-1.32312	-0.883673	0.822693	0.516221	0.178361	-0.825225	-0.739194	-1.49611	-1.52602
nw>contig10854|size105|read111|cov48.40_2423	H-probe	0.0480851	-2.01555	-1.26959	-0.891894	-1.68658	-2.32627	-2.63128	2.03113	0.793048	-2.00663	-3.05095	-1.36192	-0.150175	0.344665	-1.44672	-0.784802	-1.76788	0.626587	-2.60172	-1.00752	-1.00059	-3.72949	-4.43756		3.69937	2.34643	1.95022	3.05928	1.79521	2.61441	0.0652735	4.88937		0.746342			-0.140424	-1.37245	-2.33556	-0.113447	-1.84876	-2.29888	-2.63174	2.70486	0.422817	-2.24633	-3.11947	-1.5238
nw>contig1086|size90|read121|cov67.58_13430	H-probe	-1.10404	0.724259	-1.87836	-0.591546	-4.88106	-2.7417	-0.817474	-2.55439	-0.428061	-5.39304	0.0527101	-3.76122	-1.79606	-1.29627	-2.03603	-1.95348	-2.99622	-4.07116	-0.410958	-1.30526	-0.575498	-1.67729	2.0105		2.46073	2.17742	0.497897	0.901897	-1.4259	-3.41143	-0.319608	-0.316536		0.772184			-1.10255	-0.336868	-2.30798	-2.56442	-3.81847	-4.1717	-1.86585	0.294457	-0.73374	-1.08645	-1.68625	-1.15512
nw>contig10860|size1033|read629|cov22.96_33465	H-probe	0	-0.531826	0	0	-0.883673	0	-0.295598	0	-0.698952	-1.19456	0	-1.13705	0	-0.531826	1.06944	0	-0.0979114	1.06914	1.2828	0	-0.698952	0.0117167	0		0	0.19301	0.673517	1.26729	0.322154	0	-0.295598	0		-1.19456			1.64223	-0.531826	0	0	-0.883673	0	-0.295598	0	-0.698952	-1.19456	0	-1.13705
nw>contig10862|size1072|read659|cov22.71_73967	H-probe	1.44127	0	-0.992412	0	0	0	0	0	0	0	0	0	0	0	0.412447	0	0	0	0.99508	0	0	0	0		0	1.20503	0.764537	0.768538	0.72539	0	0	0.698714		1.07647			1.04316	0	-0.365801	0	0.734246	0.822693	0	0	0	0	0	0
nw>contig10865|size73|read17|cov11.59_13427	H-probe	2.1477	-0.647168	-0.841389	0.185082	-0.648905	1.37896	0.693614	0.81248	-1.13697	-1.58819	3.54123	-1.76495	1.03444	-0.649659	0.450971	-0.0344274	-0.641916	0	0.250533	0	-0.153653	-0.381911	0		3.05769	1.36225	2.68773	1.21107	1.60563	2.82587	0.957804	2.97336		-0.511718			2.39038	-1.06737	-0.0585333	-0.0834292	0.441843	0.822693	0.535498	1.54351	0.108464	-0.547805	0.895964	-0.209403
nw>contig10868|size81|read31|cov16.95_7429	H-probe	0.9542	-3.58335	-1.58516	-0.667118	-1.79288	-1.83775	-2.1353	1.53502	0.589261	-0.75732	-2.23359	-0.877158	-2.02077	0.30437	-1.62135	-0.268603	-3.58946	-0.227027	-2.30706	0.307933	-0.559156	-3.4151	-5.77481		3.71614	2.078	1.45158	2.95877	1.24513	1.33658	0.191342	4.31353		1.48363			0.635426	-0.427695	-2.14226	-0.036272	-2.20195	-2.43512	-1.64663	2.13319	-0.132181	-1.77654	-2.38671	-1.03937
nw>contig1087|size101|read29|cov14.34_18434	H-probe	0	-0.146874	-0.579908	-0.400107	-1.82179	-3.04163	-0.321848	0	-0.361446	-1.07144	-1.12948	0	0	-0.931086	-0.579908	-0.400107	-1.82179	-3.04163	1.25655	0	0.621869	-1.07144	-1.12948		1.03325	0.273946	0.0936087	-0.400107	-1.82179	-3.04163	-0.321848	0		0.00502861			0	-0.931086	-0.579908	-0.400107	-1.82179	-3.04163	-0.321848	0	-0.361446	-1.07144	-1.12948	0
nw>contig10870|size286|read293|cov39.03_14369	H-probe	0	0	0.093582	-0.400107	0.778772	0.84832	-0.260777	0	-0.698952	0	0	-0.602865	0	1.28727	-0.31694	-0.400107	0.785761	1.67643	0.734303	0.990922	-0.698952	1.20628	0		3.05769	1.85234	0.182311	0.368431	2.29868	1.33492	-0.260777	0.698714		0			0	0	-0.321951	-0.400107	0	0	-0.260777	0.976786	0.0541799	0	0	-0.602865
nw>contig10875|size144|read29|cov9.90_17431	H-probe	1.44127	0.759896	-0.503556	0.390534	1.28175	0.84832	-0.321848	0.81248	0	-1.12012	0	-1.02677	1.03444	0.0879151	-0.140841	0.0373867	0.785761	1.67643	0.673232	0.990922	0.983315	-1.12012	0		2.04958	1.71274	1.1221	1.5947	2.63849	2.82587	2.13984	1.52063		1.59013			1.04316	0.0433128	0.719598	0.369961	0	1.34336	-0.321848	1.17799	0	-1.12012	0	-1.02677
nw>contig10879|size134|read36|cov12.38_51433	H-probe	1.44127	1.23237	0.093582	-1.07581	0	0.300581	0.875175	-0.999629	-0.562343	-1.19456	0	-1.13705	1.03444	0.0558053	-0.31694	0.241054	1.962	-1.77036	-0.562987	-0.999629	0.420972	-1.19456	0		0	0.837807	-0.948562	1.49095	1.20583	-1.77036	1.8987	-0.999629		-0.118091			1.04316	0.881712	-0.321951	-1.07581	1.21851	-0.947668	-0.562987	-0.603849	0.190789	-1.19456	0	-1.13705
nw>contig10881|size98|read39|cov19.50_0435	H-probe	-0.0181416	-2.17534	-1.24762	-0.700496	-1.78183	-2.47705	-1.97634	1.64548	1.35822	-1.4508	-2.40645	-1.60888	-0.464764	0.0629978	-1.51022	-0.543118	-1.81208	-0.464335	-2.02804	-0.342998	-0.284177	-2.69139	-4.31187		3.56931	2.11364	2.01941	3.01582	1.97645	1.98971	0.653521	4.73804		1.23197			-0.199882	-1.55441	-2.2797	0.00460758	-1.89611	-3.01248	-2.30145	2.50803	0.419573	-1.34688	-2.58711	-1.85259
nw>contig10884|size537|read98|cov8.70_328436	H-probe	0	0.228948	0.0919493	0	0	0	1.43816	0	-0.253327	-0.30955	0	-1.01498	1.6307	-1.06048	-0.521246	0.803741	1.29161	0	0	0	-0.253327	-0.30955	0		0	0.504213	1.46963	2.56677	1.85335	0	1.70235	1.16743		0.76692			2.88057	0.182195	0.105365	0.775997	0	1.34336	1.28005	0.961223	-0.253327	1.32901	0	-1.01498
nw>contig10885|size95|read21|cov10.83_4437	H-probe	0.534924	-1.68489	-0.674634	-0.672782	0.450805	-0.497126	-0.0525526	0.901595	-1.51189	-1.3463	-2.3351	-1.23374	-0.355138	-0.367276	-0.859467	-1.03261	0.49161	0.172888	0.188157	0.486639	-0.937707	-1.66782	-1.85691		3.77243	2.31316	2.51103	2.69204	4.27096	3.06422	2.68599	3.9455		1.34712			-0.768268	-1.25172	-1.45962	-0.239972	0.368828	-1.17532	0.143105	1.95773	-0.29558	-1.59893	-2.41599	-2.02504
nw>contig10887|size120|read68|cov27.50_55438	H-probe	2.1477	0.0164944	1.86753	-1.12997	-0.883673	-0.00431392	0.910674	0.81248	-1.80369	-0.632981	0	-0.894544	2.05135	-0.655486	1.15557	-1.11483	0.407933	-1.77036	-1.23321	0.990922	-0.241021	-0.632981	0		3.76123	1.20007	2.87372	0.955613	2.2604	1.05551	-1.23321	2.58122		0.443489			0	-0.334167	0.105365	0.026098	-0.149427	-0.427005	-1.23321	0.418751	-1.80369	-0.632981	0	0.661006
nw>contig1089|size81|read16|cov9.62_21442	H-probe	-1.65454	1.27898	-1.16868	0.298353	-4.37247	-2.86604	-0.905571	-2.43356	0.043008	-5.70654	1.94868	-3.98909	-1.76739	-0.643825	-1.28022	-1.09971	-2.929	-3.76843	-0.65132	-0.994723	-0.365668	-1.69458	3.26236		2.21369	2.62181	1.19091	1.55537	-1.5994	-2.9556	-0.411664	-0.336791		0.880067			-1.20532	0.121134	-1.56705	-1.51668	-4.15092	-4.0905	-1.96772	0.299406	-0.484008	-0.974962	-1.09171	-0.484486
nw>contig10892|size100|read21|cov9.92_40439	H-probe	-1.33857	-1.21923	-0.678174	-1.32312	1.28175	1.76605	0.719041	-0.999629	-1.03287	-1.19456	0	-1.61275	-1.33857	0.0680451	-0.650882	-0.0062501	0.785761	2.43101	-0.719121	-0.00870661	-0.0495557	0.0117167	0		2.04266	2.59371	1.96888	2.77967	4.06008	2.01622	2.23748	2.45572		0.918676			-1.33857	-0.468037	-1.72032	-0.0452827	2.31648	1.34336	-0.719121	-0.00744522	0.578936	-1.19456	0	-1.61275
nw>contig10894|size78|read60|cov36.24_18440	H-probe	-0.463366	-2.22315	-1.32652	-0.631101	-2.04266	-2.2384	-2.75803	2.94395	1.11412	-1.95902	-3.9148	-0.817055	-0.769223	0.526872	-1.63057	-0.707413	-1.98285	0.0170558	-2.14595	0.449383	-0.378731	-2.61001	-3.27799		3.4085	2.37134	1.95266	3.27654	1.82337	2.406	0.0087012	6.12404		0.91426			-0.211219	-1.39118	-2.31743	0.211905	-2.28797	-1.77833	-1.90474	3.74498	0.717738	-1.5286	-2.9894	-1.00116
nw>contig10898|size201|read47|cov11.24_55441	H-probe	1.28127	-1.65444	-0.630994	-0.617063	-0.840224	0.84832	-1.08645	1.3291	-1.71551	-0.444805	-2.19011	-1.96988	1.03807	-0.778278	-0.221645	0.216046	-1.12443	0	-1.08645	1.57285	-0.152841	-0.882032	-2.19011		-0.305321	0.704173	0.526752	1.11195	1.21261	3.54328	1.37524	3.18583		0.354098			1.31763	-0.538428	-0.831094	-0.0023327	-1.2094	1.34336	0.193599	1.54351	-0.962382	-1.04793	-0.0384465	-0.414331
nw>contig1090|size98|read237|cov115.88_32447	H-probe	-0.428559	-0.149974	-2.03678	-0.832776	-2.4921	0.0187807	1.13506	-0.954266	-1.52636	-2.92094	-1.47302	-6.19956	-0.926979	-1.83516	-0.31437	-1.18077	-0.751434	-2.40642	0.77999	-0.748653	-0.528156	-2.35343	0.505054		2.07814	1.08786	0.496428	1.04982	1.24304	0.195283	2.2928	1.00424		0.734259			0.178341	-0.718839	-2.15904	-0.421676	-1.26485	-1.23204	0.428479	0.298054	-0.612629	-1.70012	-1.51214	-3.913
nw>contig10902|size97|read32|cov14.76_3444	H-probe	-0.0552165	-1.81529	-0.536476	-1.37273	0.602038	1.40762	0.972096	1.46602	-1.08575	-1.60288	-2.34925	-0.714975	-0.795836	-0.658474	-0.801414	-1.46828	0.810194	2.52407	0.898072	0.396559	-0.279863	-3.05734	-3.25357		3.44933	2.14536	2.3848	2.05596	4.41377	5.09231	3.19702	4.47555		0.971269			-0.400233	-1.56502	-1.58248	-0.84052	0.457229	0.739261	0.910706	2.41562	-0.0288481	-1.74769	-2.41129	-3.08261
nw>contig10904|size133|read27|cov10.14_18445	H-probe	0	-1.3645	-0.235664	-0.705889	1.28175	0.84832	0	0	-1.16638	-0.698565	0	-0.466748	0	-0.192161	-1.27781	-0.684619	0	1.67643	0	0.990922	-0.183064	-0.698565	0		1.62912	1.66422	1.94398	1.00489	3.43299	2.01622	2.46169	2.58122		0.377905			0	-0.90604	-1.27781	-0.352045	1.21851	1.72514	1.94745	1.82633	0.0790533	-0.698565	0	-2.14929
nw>contig10909|size85|read21|cov11.72_25446	H-probe	-1.48069	0.71645	-1.56383	0.174784	-4.82734	-2.87032	-1.12137	-2.87909	-0.739089	-5.07565	0.454459	-4.87719	-1.945	-1.32476	-2.01433	-0.971745	-3.21547	-4.19963	-0.653159	-1.69219	-0.948151	-1.61909	1.44956		2.14162	2.04655	0.781347	1.35878	-1.89944	-3.34555	-0.580356	-0.537498		0.768001			-1.33236	-0.55043	-1.86741	-1.67751	-4.36466	-4.15693	-2.25329	-0.187338	-1.17284	-1.10952	-3.16372	-1.31673
nw>contig1091|size99|read156|cov78.17_30453	H-probe	-2.34989	0.238173	-1.57577	-0.300037	-4.47867	-3.03423	-2.00147	-2.66975	-1.04663	-5.62597	1.4552	-5.38463	-2.19984	-1.11712	-1.1974	-1.3698	-3.17318	-3.58297	-0.84291	-1.26347	-1.62572	-1.95165	2.09202		2.10689	1.87928	0.92871	0.661091	-2.12918	-3.46555	-1.20079	-0.627435		0.275386			-1.30658	-0.718786	-1.84423	-2.29637	-4.5325	-4.37369	-2.60697	0.258489	-1.89658	-0.964571	-1.57818	-0.783317
nw>contig10914|size86|read18|cov9.72_9450	H-probe	0.137761	0.318623	0.138807	-0.200951	0.778772	0.84832	-0.321848	0	-0.816705	-1.54183	-1.12948	-0.748964	-2.48207	-0.0569734	0.166098	-1.49655	0.785761	1.06914	0.673232	0.990922	-0.816705	-1.54183	-1.12948		1.16327	2.40008	1.46535	1.50983	2.09313	3.34137	3.00256	2.58122		-0.465362			-2.48207	-1.34425	-0.903337	-0.72055	0.734246	0.822693	-0.321848	0.992183	-0.816705	-1.54183	-1.12948	-0.748964
nw>contig10917|size146|read38|cov11.99_2452	H-probe	-0.68218	0.869714	-1.64263	0.0978252	-3.44928	-1.20586	0.0752787	-2.88764	-1.16728	-5.5327	4.47789	-5.57223	-1.73095	-1.28166	-1.96464	-1.03303	-1.82231	-2.63159	0.797281	0.141008	0.231431	-1.58957	4.55042		3.84917	3.01247	1.45094	1.76423	-0.38277	-1.37186	0.994862	0.294132		0.446792			-0.277393	-0.224184	-1.45953	-2.23914	-2.56771	-1.72144	-0.33206	0.974386	-0.0210955	-1.13499	2.15167	-2.15306
nw>contig1092|size91|read70|cov37.35_15458	H-probe	-0.466236	0.601888	-1.65636	0.834913	-4.50182	-0.879731	-0.314372	1.3291	0.446135	-3.52126	1.08175	-3.86617	-0.860062	-0.561693	0.675265	-0.680549	-2.30641	-3.06921	0.793143	0	0.167305	-1.22194	-2.45948		1.38223	1.06746	-0.303249	0.840947	-0.385735	-2.27276	1.12698	2.97336		1.43012			0.26048	0.683584	-1.20366	-1.536	-2.08941	-2.17879	-0.883032	3.40836	1.57815	-0.645352	-2.45948	-1.57961
nw>contig10922|size101|read36|cov17.71_41455	H-probe	-0.076264	-2.20202	-1.91669	-0.534708	-1.77511	-2.32802	-2.00582	2.08797	1.11097	-1.15243	-3.48422	-0.896118	-0.190742	0.305791	-1.72525	-0.67424	-1.8873	-0.389047	-2.18301	-0.275586	-0.631268	-2.93885	-3.40906		3.37982	2.17173	1.42011	3.03166	1.9161	2.0984	0.52457	5.08653		1.27073			-0.135967	-1.4121	-2.68059	0.0122116	-2.03754	-2.12993	-1.99959	2.75714	0.444122	-1.47109	-3.08849	-1.42047
nw>contig10923|size144|read43|cov14.56_28456	H-probe	2.61983	1.67835	-1.08081	-0.906168	-0.16781	2.32251	0.853332	0	-0.223443	-2.02335	-1.12948	-1.5343	1.03444	0.204934	0.737474	-0.891023	-0.156396	1.67643	0.993569	0.990922	-0.436682	-2.02335	-1.12948		3.05769	1.55497	0.83198	1.4327	0.271342	2.47711	2.37177	2.04099		0.686897			1.64223	1.06037	0.571296	-0.918767	-0.603286	1.34336	0.695216	1.3664	0.19181	-2.02335	-1.12948	-1.5343
nw>contig10926|size418|read122|cov13.73_355457	H-probe	0	0.554673	0	0.0755939	1.28175	-1.77036	-0.511486	0	-0.253327	-1.14837	0	-0.602865	0	-0.734751	0	0.0907396	0	-1.77036	-0.511486	0.990922	-0.253327	0.057911	0		0	-0.00991554	2.19211	1.6714	1.85335	-1.77036	-0.511486	0		-1.14837			2.06426	-0.734751	0.626611	0.564832	0.734246	-1.77036	-0.511486	0	-0.253327	-1.14837	0	-0.602865
nw>contig1093|size183|read585|cov146.31_37464	H-probe	-0.0513739	-1.65435	-0.184997	-0.154968	-1.38843	0.365025	0.613775	-0.0980096	-0.488071	-3.22271	-1.12948	-2.26465	0.0986771	-0.38887	-0.201319	-1.09241	0.299971	0.402462	-0.0428491	0.662356	-0.798795	-3.22271	-1.12948		3.32372	2.48553	2.32025	2.49718	2.31884	2.1291	2.05512	3.60091		0.615885			-0.150097	-0.202397	-0.980709	0.0597928	-0.781741	-0.367858	0.668545	1.36156	-0.0769026	-1.16255	-1.12948	-2.39164
nw>contig10936|size101|read27|cov12.29_40461	H-probe	1.04911	-1.57615	-0.752425	-1.57817	0.0979964	3.03626	0.384972	1.51353	-0.916262	-2.48733	-2.9455	-2.8363	0.399524	-0.54682	0.0712558	-1.0103	0.289548	4.12703	0.0531932	0.401894	-0.249232	-3.53146	-2.87602		3.29981	2.58822	2.65645	2.15131	3.81331	6.37887	1.44926	4.85818		0.608747			0.414717	-1.27241	-2.5174	-1.14778	-0.2001	2.48857	-0.705961	3.06851	0.120377	-0.655557	-2.98462	-2.8363
nw>contig10938|size119|read50|cov19.80_58462	H-probe	-0.503667	-0.207889	-0.371884	-1.16695	-1.00574	0.0395808	-1.05659	0.643259	-0.576955	-4.17413	-2.19011	-3.75968	0.930407	-0.569571	-0.207678	-1.03737	-0.106784	-1.20633	-0.233714	0.662742	-0.525485	-1.02935	-2.19011		2.69263	2.46399	1.76703	2.44269	2.41431	1.33661	1.34902	3.38162		1.39793			0.69864	0.212298	-1.14588	-0.214509	-1.2008	-1.97665	-0.248992	1.56053	-0.342232	-0.933178	-1.29415	-2.31165
nw>contig1094|size86|read70|cov41.10_25470	H-probe	0.444144	-2.09531	-1.44656	-0.709723	-1.71474	-2.1662	-2.18337	1.82793	1.13256	-1.92082	-3.56103	-1.42406	0.0817828	0.321026	-1.63282	-0.910508	-1.98901	-0.333456	-2.22059	-0.190915	-0.791056	-2.70739	-4.47658		3.73735	2.15985	1.84614	2.98502	1.94446	2.03967	0.316438	4.82739		0.816059			-0.171583	-1.49347	-2.5917	-0.274492	-1.97869	-2.64136	-2.29829	2.62666	0.302086	-1.85395	-3.02765	-1.61118
nw>contig10946|size195|read56|cov13.52_125467	H-probe	0	-1.07715	0.613195	-1.23448	0.778772	0	0	0	0	1.04413	0	-0.422548	0	-1.07715	0	-1.23448	1.6654	0	0	0	0	1.20628	0		1.03325	0.775185	1.75695	0.941111	1.85335	0	1.70235	0.698714		1.68605			0	-1.07715	0.626611	-0.458485	0.734246	0.822693	0	0.418751	0.753132	0	0.895964	-0.422548
nw>contig10947|size170|read41|cov11.66_4468	H-probe	-1.33857	-3.28989	0.28962	-0.725641	2.40436	2.07094	-2.13821	1.70871	-1.89356	-1.49207	-2.45948	-1.47283	1.30334	-0.532302	-0.193605	-0.0558849	2.90997	3.44409	-1.14313	0	-0.330887	-0.682271	-2.45948		2.72315	1.86366	2.60062	2.20678	4.89469	4.66458	1.47904	3.18583		0.766991			0.725698	-0.59714	-1.03713	-0.503026	1.86952	0.822693	-0.858164	2.0772	-0.648127	-0.89764	-1.01497	-3.15537
nw>contig10965|size138|read121|cov43.20_36473	H-probe	-0.492031	-1.21157	-1.25714	-0.562033	-1.4586	-1.6236	-1.72651	2.34344	0.368218	-1.99117	-5.94549	-1.63094	-0.735225	0.780387	-0.791714	-1.09849	-1.44364	-0.126874	-1.7058	-1.52565	-0.355903	-2.42839	-5.94549		2.37865	2.12615	2.13016	2.52869	2.07148	1.68113	0.75673	4.51432		1.31671			-0.721489	-1.28244	-2.14424	0.0140422	-2.22294	-1.8842	-2.74972	2.93114	0.0710719	-1.57451	-2.44338	-2.51365
nw>contig10966|size82|read15|cov9.01_2474	H-probe	0	0.756082	-0.379217	0	0	0.84832	0	0	-0.253327	-0.736268	0	0	2.05135	-0.1241	-0.992412	0.803741	0	0	0	0	0.729988	-0.736268	0		0	-0.906787	-0.992412	0	0.72539	0	0	0		-0.736268			0	0.993442	0.0696183	0.775997	0	1.34336	0	0.706028	0.992106	-0.736268	0	0
nw>contig10967|size110|read38|cov17.23_50475	H-probe	-1.30596	0.632556	-1.34979	0.0593905	-4.65928	-2.95208	-1.10183	-3.30741	-1.37882	-6.01899	1.23562	-4.2448	-2.32954	-1.44976	-1.64679	-1.17784	-3.13815	-3.78464	-0.684413	-1.75526	-1.66846	-1.58178	2.16811		2.17537	1.91222	0.958547	1.46195	-1.82479	-3.10613	-0.592872	-0.918664		0.897506			-1.23382	-0.541629	-1.87884	-1.78936	-4.29686	-4.20765	-2.36171	-0.314931	-1.98399	-1.17682	-2.03998	-0.567559
nw>contig10970|size110|read22|cov8.30_27477	H-probe	-0.466236	-2.0234	-0.774155	-0.37402	0.0979964	3.40665	0.0600786	2.30368	-0.0555091	-1.53641	-5.5701	-4.183	-0.342623	-0.0328462	-0.0973459	-0.915187	-0.321327	3.44409	-0.00928974	0.836201	0.657885	-1.4402	-1.95939		2.96849	2.5165	2.17892	2.40871	3.72606	6.64342	2.55252	5.22362		1.3854			0.160549	-1.20746	-0.865162	-0.344467	-0.2001	3.45853	0.566713	2.89454	0.872252	-1.12572	-1.19161	-4.183
nw>contig109703|size80|read13|cov8.28_13476	H-probe	-0.373997	-1.76986	-1.36971	-0.442919	-1.66816	-1.89711	-2.71469	1.94179	1.27776	-2.11583	-3.11168	-1.09502	-0.359143	0.467893	-1.78925	-0.653087	-1.70434	0.30906	-1.90928	-0.826261	-0.155252	-3.38353	-5.73921		3.52702	2.42432	1.933	3.17616	2.07982	2.62742	0.355408	4.85715		0.832047			-0.554317	-1.23454	-2.16343	0.0824316	-1.85043	-1.75472	-2.41124	2.65168	0.680871	-2.02649	-2.71857	-1.5065
nw>contig10972|size277|read57|cov9.82_92478	H-probe	0	-0.749114	0.462236	-0.287217	0	0.84832	1.43816	0.81248	-1.33992	-0.391157	0	-0.894544	0	0.0335718	0.0517139	0.241054	0.785761	0	1.5784	0	-1.33992	0.81512	0		0	1.54845	1.41097	0.855557	1.85335	0	2.9566	0.698714		-0.391157			1.04316	0.493556	-0.579908	-0.299815	0.734246	0	0	0.706028	-1.33992	-0.391157	0	-0.894544
nw>contig10974|size74|read23|cov15.68_6479	H-probe	-1.51109	0.831709	-1.6976	-0.0454519	-4.79828	-3.19642	-1.0515	-3.56307	-0.384914	-5.49331	0.282794	-4.8353	-1.83126	-0.919895	-1.89852	-1.09426	-2.99178	-4.24944	-0.521406	-1.96916	-0.701043	-1.48473	2.54569		2.23605	2.25082	0.626165	1.46965	-1.9727	-3.37544	-0.473943	-1.48142		1.0331			-1.19967	-0.266524	-1.95227	-1.86555	-4.38104	-4.23789	-2.23144	-0.493439	-0.855967	-0.929986	-1.94562	-0.829258
nw>contig10975|size131|read22|cov8.34_61480	H-probe	-2.03398	1.62582	-1.78133	0.417992	-2.77027	-0.766768	0.437585	-1.66922	-0.278398	-4.46815	0	-4.03528	-2.4278	-0.131595	-2.11798	0.00621868	-1.62946	-2.78611	1.08807	-0.0723885	0.731314	-1.12448	3.61071		2.77742	3.89008	1.11197	1.76612	-0.281333	-1.5919	1.30749	0.777696		0.676502			-1.30726	0.663175	-1.95297	-1.65428	-2.68212	-2.33259	0.300753	0.925864	-0.12709	-1.59225	0	-1.26585
nw>contig10978|size330|read86|cov12.30_54481	H-probe	1.44127	0.382637	-1.46577	-1.07581	-0.145926	0.84832	-0.961932	0	-0.860191	-1.19456	0	0	0	-0.1241	-0.674106	-0.272071	-0.136072	1.06914	0.0331482	0	-0.860191	-1.19456	0		2.04958	1.18527	0.588839	0.561393	1.05089	1.33492	1.99467	0.698714		-1.19456			1.64223	0.335884	-1.45235	-1.07581	-1.42768	1.34336	-0.961932	0	-0.860191	-1.19456	0	0
nw>contig10983|size82|read49|cov22.85_2274	H-probe	0	-0.749114	-0.948562	-1.12595	0	1.37896	0	0	0	0	0	0	0	-0.749114	-0.31694	-1.12595	0.785761	0	0	0	0.983315	0	0		2.86389	2.39371	0.808387	0.511254	2.29868	2.01622	2.46169	0.698714		0			0	-0.749114	-0.948562	-1.12595	0	0	0	0.395779	0	0	0	0
nw>contig10984|size88|read15|cov8.07_18484	H-probe	0.137761	-1.79396	-0.469939	-0.424628	-1.42768	-0.504971	1.06723	1.74339	-0.925745	-1.25405	0	-2.09006	-0.851374	-0.621624	-0.00600156	-0.854362	0.534319	-3.04163	1.02827	0.662356	0.656333	-0.444248	0		1.48627	1.53601	1.89223	1.19443	2.68783	0.0648974	2.86353	2.37088		0.833099			0.763709	0.391172	-0.0179877	-1.19859	-0.209172	-2.21893	-1.54849	1.53319	-0.510492	-0.659617	0	-2.09006
nw>contig10985|size229|read49|cov9.68_31485	H-probe	0	-0.507423	-0.335367	-0.400107	-0.883673	0	-0.260777	0	0	1.04413	0	-0.602865	0	0.275263	-0.948562	0.403635	-0.883673	0	-0.260777	0	0	0	0		1.62912	0.697609	-0.275045	-0.400107	0.322154	0	1.44157	0		1.07647			0	0.243767	-0.948562	0.37589	-0.883673	0.822693	-0.260777	0.395779	0	0	0	0.952685
nw>contig10986|size80|read25|cov14.81_13486	H-probe	-0.579498	-1.92165	-1.49612	-0.790693	-0.995972	-1.69339	-1.3728	-0.91049	1.2777	-2.67679	-4.28561	-0.72212	0.0305844	0.435696	-1.46018	0.0424165	-0.982038	0.382216	-3.51668	0.0804323	-0.662378	-2.67679	-4.28561		3.59819	1.99444	2.0838	2.97191	1.85861	2.12287	0.100563	4.03936		1.1618			-2.02077	-1.96841	-1.74095	-0.568078	-1.71374	-2.54171	-1.11467	1.90501	-1.47192	-0.290783	-2.13394	-0.1181
nw>contig10987|size72|read22|cov14.18_10487	H-probe	-1.49652	0.71071	-1.38592	0.0435662	-4.45871	-2.90342	-1.18041	-2.42821	-1.11245	-3.66712	0.993994	-5.18133	-2.04001	-1.43004	-1.11561	-0.981829	-3.05472	-3.76059	-0.677305	-1.55878	-1.27661	-1.69146	2.0354		2.13117	1.87594	0.988742	1.10174	-1.63994	-3.07038	-0.604025	-1.06279		0.731903			-1.15459	-0.544357	-1.67013	-1.8482	-3.95771	-3.90698	-2.36501	-0.426258	-1.58095	-0.989079	-2.03939	-1.17945
nw>contig1099|size70|read227|cov111.40_077	H-probe	0.154216	0.467824	-1.3852	-0.813472	-3.09503	-1.73496	-0.0994941	-1.95716	-2.50412	-4.66873	2.41174	-4.54518	-1.08405	-1.42442	-1.71564	-2.10104	-1.48705	-3.45302	0.904865	-0.302179	-1.45936	-1.52395	-1.12948		3.83128	2.33309	0.847206	0.578449	-0.466413	-2.13229	0.617589	-0.100429		0.520457			1.05637	-0.318403	-2.11465	-3.62332	-3.00687	-2.44716	-1.66031	0.827236	-1.39136	-0.506166	-0.23352	-2.25862
nw>contig10996|size87|read37|cov20.54_0489	H-probe	0.298655	-1.72471	-0.68028	-1.55917	0.761785	-0.195124	0.123775	1.68985	-1.37115	-1.52585	-2.41152	0.810418	-0.500382	-0.408619	-0.242079	-1.62344	0.369075	0.508223	-0.0561107	-0.334972	-0.516649	-2.10873	-3.27871		3.44839	2.35056	2.67396	1.62488	4.11341	3.7535	2.47274	4.10049		1.51982			0.10272	-1.25054	-1.77067	-1.10795	0.317275	-0.72155	0.564842	1.92288	-0.0757673	-3.36767	-2.23958	-2.16381
nw>contig10997|size134|read25|cov8.92_19490	H-probe	-0.549493	-1.80048	-1.04382	-1.31327	0.508946	0.512531	0.70811	1.65126	-0.884597	-1.39328	-0.82061	-1.26896	-1.29468	-0.764141	-0.625963	-1.23835	0.579262	0.871128	0.750834	-0.126916	-0.34439	-1.66788	-3.44814		3.63439	2.61348	2.39182	2.39631	4.56624	3.77266	3.15313	4.46738		1.19457			-0.848644	-1.54108	-1.90111	-0.701058	0.558928	0.0853108	-0.0927476	2.67375	0.152086	-1.56414	-1.94727	-3.51217
nw>contig10997|size155|read126|cov29.92_8675	H-probe	-1.33857	0	0	0	-0.883673	0	-0.58483	0	0	0	0	0	-1.33857	0.782686	0	0	-0.883673	0	0.410251	0	0.983315	0	0		0.290555	0.724835	0.673517	0.768538	-0.158283	0	-0.58483	0		0			-0.295407	0.75119	0	0	-0.883673	0	-0.58483	0	0	0	0	0
nw>contig10998|size383|read231|cov21.99_28376	H-probe	0	0.784212	0.613195	0	-1.42768	0	-0.321848	0	0	0	0	0	0	0	0	0	-1.42768	0	-0.321848	0	0	0	0		0	0	0	0	-0.702288	0	1.3805	0		0			0	0	0	0	-1.42768	0	-0.321848	0	0	0	0	0
nw>contig1100|size91|read301|cov128.80_13493	H-probe	-0.130639	-2.30945	-1.07809	-0.32021	-1.50406	-2.46866	-1.48048	1.93795	0.965738	-1.48344	-4.6216	-1.64042	-1.05304	0.15147	-1.40428	-0.646219	-2.03778	-0.440329	-1.81325	-0.26704	0.110017	-2.2753	-3.61241		3.14149	2.24306	2.17583	2.88223	1.66611	1.96361	0.684585	5.04742		1.25753			-0.701582	-1.37683	-2.16248	-0.174691	-2.18045	-2.15997	-1.32713	2.76216	0.822185	-1.31315	-2.56748	-1.2547
nw>contig11004|size430|read178|cov19.87_370492	H-probe	-1.33857	-1.78222	0.737548	0.271729	-0.104901	0	-0.58483	0	0.379849	-0.4244	0	-0.602865	-1.33857	-0.494944	0.166098	-1.02387	-0.883673	0	0.410251	0	-0.816705	-1.46853	0		-0.305321	2.15886	1.76447	2.1036	2.36327	2.47711	1.87686	0.698714		0.973879			-1.33857	-0.539547	-0.276726	0.920801	0.334833	0.822693	-0.58483	0.395779	-0.816705	-1.46853	0	-0.602865
nw>contig1101|size110|read169|cov68.87_29497	H-probe	-1.47872	0.865615	-1.4064	-0.109124	-4.78579	-3.11688	-1.21731	-3.4269	0.270057	-4.61324	1.33834	-4.19049	-1.35169	-0.894422	-1.87113	-0.662033	-2.99484	-4.18723	-0.653202	-1.56475	0.0871162	-1.77218	1.97515		2.39944	2.37386	0.88395	1.66901	-1.78249	-3.33572	-0.52955	-0.808023		1.03818			-1.10342	-0.172976	-1.86698	-1.41039	-4.1599	-4.11346	-2.24208	-0.0835663	-0.518023	-0.659691	-2.24359	-0.405716
nw>contig11013|size86|read21|cov12.30_8494	H-probe	-0.970809	1.20166	-1.24288	0.351024	-3.95469	-2.92112	-0.506075	-0.983587	1.03668	-4.68641	2.11042	-3.39091	-1.06497	-0.431988	-0.864824	-1.3771	-2.89532	-3.84011	-0.418664	0.0110987	0.476618	-1.43446	1.61973		2.46249	2.92012	1.11009	1.5649	-1.44516	-2.82946	0.159032	0.63237		0.806744			-0.910641	0.203144	-1.72019	-1.53739	-4.09997	-4.11313	-1.39229	1.09024	0.417933	-0.666902	-0.523535	-0.200204
nw>contig11014|size82|read31|cov16.60_14495	H-probe	-0.72698	-1.67407	-0.352821	-2.21572	0.15596	-0.775663	-0.280829	2.33304	-2.67719	-0.622964	-2.89233	-0.56787	-1.71612	-0.261586	-0.705021	-1.8173	0.46276	1.67326	0.0948366	1.30775	-1.09512	-1.06017	-6.43356		2.74031	2.31963	2.68829	1.69633	4.32794	4.22787	2.3156	5.24387		0.6118			-2.30365	-1.39395	-1.86838	-1.81607	0.25781	0.132057	-0.49453	3.50075	-0.468264	-1.31331	-2.24634	-0.719564
nw>contig11024|size195|read295|cov55.59_481	H-probe	2.1477	-1.35285	-0.0794325	-0.400107	0.778772	0.84832	0	0	0.727809	-0.84003	0	-0.422548	2.05135	-1.35285	-1.72032	0.403635	0	0	0.99508	0	0.51457	0.366247	0		2.63995	0.739204	0.805664	2.16666	1.20583	2.47711	0	2.24438		0.23644			1.64223	-0.601665	-1.09371	0.37589	0	1.72514	1.28005	0.706028	-0.468746	-0.84003	0.895964	-0.422548
nw>contig11026|size109|read35|cov15.89_21499	H-probe	-1.63353	0.140501	-1.49864	-0.540446	-4.64641	-2.92836	-0.8052	-2.65361	-1.70663	-4.60794	1.63073	-3.33183	-1.94032	-1.57925	-2.21098	-1.89607	-3.07381	-3.99406	-0.842973	-1.70653	-2.28178	-1.61912	0.726409		1.99694	1.33483	0.641955	0.626725	-1.69641	-3.35465	-0.305928	-0.287313		0.735244			-1.47425	-1.04731	-1.83645	-2.41531	-4.20802	-4.05302	-1.98925	0.0568818	-2.46782	-0.856707	-1.76417	-0.278027
nw>contig1103|size89|read346|cov167.75_11504	H-probe	0.0559519	-2.00061	-1.66076	-0.755704	-1.65307	-2.51183	-2.48129	2.05589	0.996078	-1.99048	-3.66645	-1.261	-0.381789	0.571859	-1.9152	-0.861577	-1.75601	0.189649	-2.60502	-0.486289	-0.769634	-3.08315	-4.19671		3.68848	2.42865	1.61336	3.25372	2.01353	2.49358	0.0925905	5.0513		0.715785			-0.195834	-1.38281	-2.76279	-0.0727664	-2.00576	-2.26097	-2.63267	2.79158	0.526532	-1.97674	-3.20301	-1.46306
nw>contig11033|size352|read178|cov23.80_32500	H-probe	0	-1.59291	0	-0.777163	0	0	-0.260777	0	-0.361446	-0.698565	-1.12948	-0.602865	0	-1.59291	0.631622	-0.777163	0.785761	0	-0.260777	0	-0.361446	-0.698565	-1.12948		2.04958	1.65277	1.99088	1.39843	1.56562	2.47711	1.44157	0.698714		0.377905			1.04316	-0.841723	0.626611	-0.00116552	1.21851	0	1.01927	0	-0.361446	-0.698565	-0.23352	-0.602865
nw>contig11034|size79|read37|cov22.90_0501	H-probe	-0.191865	-2.0466	-1.62474	-0.640636	-1.68416	-2.47357	-2.09336	2.02699	1.0479	-1.62728	-3.26922	-1.05835	-0.223213	0.398068	-1.6509	-0.908913	-1.78523	-0.208234	-2.14384	-0.292436	-0.644573	-2.98687	-4.44573		3.53325	2.27124	1.66642	3.10753	1.90995	2.1135	0.407755	5.07952		1.08624			-0.16288	-1.25656	-2.45027	-0.0200857	-2.0349	-2.48724	-2.09047	2.85208	0.474169	-1.66491	-3.12392	-1.32977
nw>contig11036|size122|read50|cov19.73_3502	H-probe	-1.63622	0.995344	-1.61536	-0.0185939	-4.63808	-2.89641	-1.11968	-2.56026	-0.355772	-5.39177	-2.71522	-4.43838	-1.89464	-0.9183	-2.31646	-1.02638	-3.13872	-4.1817	-0.542367	-1.42548	-0.536555	-1.81901	1.93643		2.21606	2.37391	0.669407	1.27337	-1.8285	-3.39877	-0.569753	-0.273262		0.848686			-1.18418	-0.256243	-1.9416	-1.80283	-4.3895	-4.09887	-2.2627	0.0385237	-0.840203	-1.07663	-3.63232	-1.21146
nw>contig11037|size104|read156|cov55.74_4484	H-probe	-0.579498	0.0699554	-1.70188	-0.777163	-0.104901	0	-0.763824	0	0.634211	-0.897016	-1.12948	-0.602865	-2.02077	-0.305641	-0.910216	-0.777163	-0.0979114	0	-0.763824	0	-0.562343	-0.897016	-1.12948		1.20774	1.18832	0.481848	-0.00862473	1.89876	2.01622	0.938527	0.698714		0.789031			-2.02077	0.0156793	-2.31508	0.500671	-0.883673	0	-0.763824	0.395779	-0.562343	-0.897016	-1.12948	-0.602865
nw>contig11038|size248|read75|cov13.81_138503	H-probe	1.44127	0.458746	-0.664613	-0.777163	0	-0.922042	0	0	-0.965937	-1.33804	0	-1.02677	0	-0.421437	-0.646185	-0.777163	0.785761	-0.701223	1.5784	1.98636	0.0173783	-0.13176	0		2.04958	1.82795	0.479141	-0.00862473	2.09313	-0.435445	1.70235	2.58122		0.775199			0	0.0385474	0.389283	-0.00116552	0	-0.947668	0	0.976786	0.64587	-1.33804	0	0.528779
nw>contig1104|size95|read96|cov51.13_8510	H-probe	-1.88624	0.777929	-1.33008	0.124735	-4.36965	-3.11054	-1.49155	-3.17828	-1.0394	-6.83826	1.01604	-4.92936	-2.04907	-1.20249	-1.28805	-1.34475	-2.96532	-3.78233	-0.84481	-1.65173	-1.33699	-1.77737	2.57951		2.2852	2.1061	1.00196	1.31992	-1.7139	-3.08181	-0.962536	-0.935755		0.689419			-1.13187	-0.500335	-1.87309	-1.61791	-4.2919	-4.25133	-2.49674	-0.0959025	-1.65818	-1.01886	-1.39524	-0.959154
nw>contig11041|size155|read54|cov15.92_26505	H-probe	0	-0.546189	-0.173345	-1.49655	-0.883673	-1.77036	-1.10168	-0.999629	1.19127	-0.951837	-1.12948	0	0	-0.547715	-0.914078	-0.692806	-0.883673	-0.701223	-0.106597	-0.999629	0.333078	-0.951837	-1.12948		4.14942	1.91529	0.646412	0.88785	1.41501	-1.77036	2.22274	1.72448		0.73421			1.04316	-0.087731	-0.149649	-0.72055	-0.149427	-0.947668	1.30034	-0.0384053	0.595196	-0.951837	-1.12948	0
nw>contig11043|size160|read29|cov8.63_77507	H-probe	0	0.984909	1.04214	0.788596	-1.04302	0	0	-0.999629	0	-0.391157	0	-0.894544	0	-0.304515	1.40486	0	-1.82179	0	0	-0.999629	0	-0.391157	0		2.86389	1.78754	1.99088	1.63721	0.0315612	2.01622	1.70235	0.521005		1.72208			1.04316	0.938156	0	1.27783	-1.82179	0.822693	0	-0.275045	0.753132	-0.391157	0	-0.894544
nw>contig11048|size495|read148|cov14.23_221509	H-probe	-1.33857	-0.555822	-0.521246	-0.355752	0.398079	0	-0.562987	0	-0.361446	0	-2.68637	-0.748964	-0.304129	0.226864	-0.521246	-1.65135	-0.0979114	0	-0.562987	0	-0.361446	1.20628	-2.68637		-1.33857	1.29652	1.67087	0.524244	1.20946	1.33492	-0.562987	0.698714		1.68605			0.30366	-0.555822	-0.521246	-0.373515	0.334833	0	-0.562987	1.40142	0.883987	0	-2.68637	0.806586
nw>contig1105|size70|read91|cov64.54_10511	H-probe	0.137005	-2.20623	-1.32007	-0.577425	-1.6941	-2.53315	-2.28779	1.70372	1.24919	-1.82401	-3.37195	-1.95054	-0.309956	0.312802	-1.45129	-0.597845	-1.75574	-0.627775	-2.36288	-0.994725	-0.8822	-2.80791	-3.5581		3.72688	2.14497	1.96857	3.16702	2.01852	1.73905	0.29627	4.60935		1.12891			-0.341212	-1.43768	-2.41518	-0.0250608	-1.83499	-2.80575	-2.44823	2.40524	0.313263	-1.69649	-2.84109	-1.43279
nw>contig11056|size105|read91|cov30.93_1385	H-probe	0	-0.275907	-0.335367	0.788596	-0.104901	0.84832	-0.58483	0	-0.361446	-0.30955	0	-0.422548	0	-0.275907	0.120874	0	-0.0979114	1.06914	-0.58483	0	-0.361446	1.54438	0		1.03325	1.28878	-0.275045	0.768538	0.322154	0	-0.58483	0		-0.30955			0	0.475284	-0.948562	1.64944	-0.883673	0	-0.58483	0	0.391686	0.730832	0	-0.422548
nw>contig1106|size184|read158|cov40.42_53518	H-probe	-1.44556	0.883626	-1.61227	-0.0135117	-4.62748	-3.069	-1.19707	-3.61441	-0.178133	-6.72131	1.23502	-4.55972	-2.21131	-1.06858	-2.39904	-1.24603	-3.12196	-4.40854	-0.546745	-1.38052	-0.23877	-1.64432	2.97946		2.31611	2.37017	0.637953	1.473	-1.98492	-3.42863	-0.79855	-1.44136		0.950316			-1.06056	-0.442749	-1.97212	-1.93506	-4.41642	-4.27575	-2.42792	-0.104257	-0.59751	-0.953306	-2.12395	-1.18171
nw>contig11068|size111|read22|cov9.91_0516	H-probe	-1.65015	0.907462	-1.5427	0.0376334	-4.73759	-3.17775	-0.98794	-3.59191	-0.408129	-6.13815	1.69354	-4.59395	-2.20669	-0.980496	-2.12905	-1.15089	-3.13713	-4.29961	-0.507756	-1.63298	-0.460677	-1.56321	3.08088		2.12513	2.34617	0.711548	1.44429	-2.01495	-3.35837	-0.402577	-1.34998		1.03774			-1.34084	-0.316413	-1.94367	-1.69354	-4.4587	-4.30645	-2.29945	-0.261793	-0.778309	-0.858967	-1.47064	-0.676645
nw>contig11069|size82|read20|cov12.37_1517	H-probe	0.100555	-2.08149	-1.88838	-0.741921	-1.64983	-2.30611	-2.89234	2.23994	0.816082	-1.94757	-3.89324	-1.66559	-0.315168	0.499877	-2.04721	-0.942675	-1.74647	0.330345	-2.78223	-0.394105	-0.961408	-3.22941	-4.29433		3.74291	2.3591	1.3434	3.22371	2.00123	2.57574	-0.302596	5.24869		0.674403			-0.102173	-1.47865	-3.13157	-0.0239807	-1.97412	-2.17337	-3.01931	2.99459	0.536975	-1.98357	-3.3359	-1.74905
nw>contig1107|size104|read73|cov35.50_8522	H-probe	-1.59902	1.05504	-1.53409	0.476148	-4.81012	-2.81219	-0.984958	-3.16779	-0.432507	-5.66041	1.78033	-3.15364	-2.29535	-0.977349	-1.79139	-0.783166	-3.02273	-4.20405	-0.534651	-1.49716	-0.483795	-1.4576	2.15336		2.2013	2.42559	0.849866	1.65	-1.64889	-3.45723	-0.356441	-1.03266		0.989247			-1.35822	-0.192096	-2.03242	-1.41315	-4.12026	-4.24991	-1.91596	-0.0842804	-0.864043	-0.976791	-2.21326	-0.900685
nw>contig11073|size202|read40|cov9.22_109520	H-probe	0	0.0494614	0.0945476	-1.32312	0	1.37896	-0.999801	0	0.336363	-0.897016	0	-1.13705	1.03444	-0.734751	-0.646185	-1.32312	0.785761	0	-0.999801	0	-0.860191	-0.897016	0		2.37476	-0.00991554	0.914304	0.852476	1.56562	0	1.46189	0		0.179454			0	-0.734751	-0.215777	-1.32312	0.734246	0.822693	0.280245	0.395779	-0.107059	0.143366	0	-1.13705
nw>contig11076|size153|read41|cov13.08_35521	H-probe	1.44127	-1.21451	0.613195	-0.969983	0	0.84832	0	0	-0.253327	-1.37862	0	0	1.03444	-0.431826	0.631622	-0.969983	1.29161	0	0.99508	0	-0.253327	-1.37862	0		2.63995	1.69759	1.13087	2.26919	1.56562	0	2.46169	1.16743		-0.30215			1.04316	-0.463322	0	-0.969983	0	1.34336	0	0.706028	-0.253327	-1.37862	0	0
nw>contig11076|size1535|read914|cov22.63_30887	H-probe	0	1.28942	0	0.309208	-0.883673	0	0	0	-0.650237	0	0	-0.602865	0	0	0	-0.479388	-0.883673	0	0	0	0.333078	0	0		0	1.20503	1.75695	-0.479388	-0.883673	1.33492	0	0		0			1.04316	0	0	0.29661	-0.883673	0	0	0.395779	-0.650237	0	0	-0.602865
nw>contig11080|size201|read55|cov12.79_141523	H-probe	0	1.01352	-1.4856	0	-0.883673	0	1.43816	0	0	-0.30955	0	0	0	0.50678	-0.853978	0	0.407933	0	0	0	0	1.54438	0		2.63995	0.448929	-0.354726	1.63721	1.20946	0	1.70235	0		0.76692			1.04316	0.475284	-0.858989	0.775997	-0.883673	0.822693	1.28005	0.706028	1.24543	-0.30955	0	0
nw>contig11082|size90|read37|cov19.50_10525	H-probe	-1.57826	-3.22425	-1.19052	-0.730296	-1.25282	-3.04839	-1.85658	3.94189	0.877226	-0.477699	-2.15757	-1.97696	-1.67461	0.548747	-1.25802	-0.788652	-2.02539	-1.53656	-1.51419	2.30738	-0.71912	-0.914905	-5.6988		2.7653	2.35088	1.61108	2.77633	1.65196	1.25954	1.01467	6.31298		1.80065			-0.845388	-1.02211	-1.95506	-0.0174969	-2.25686	-3.0926	-1.19176	4.2167	0.0328388	-0.678152	-2.43448	-0.890072
nw>contig11084|size228|read69|cov14.96_41526	H-probe	0.102703	-1.3673	0.0919493	-0.838591	0.778772	0	-0.321848	0	-0.698952	0	0	-1.44257	-1.33857	-1.3673	-0.521246	-0.838591	0	0	0.673232	0	-0.698952	1.20628	0		-0.305321	0.724758	1.84744	2.40058	2.47857	1.33492	2.13984	1.52063		0			-1.33857	-1.3673	-0.521246	0.439243	0.734246	0.822693	-0.321848	0.395779	-0.698952	0	0	-1.44257
nw>contig11088|size113|read46|cov20.08_2528	H-probe	-0.046925	-1.8841	-1.77108	-0.512415	-2.08753	-2.20989	-1.43919	2.61125	1.46728	-1.0017	-1.97412	-0.59954	0.0232481	0.648134	-1.46482	-0.939842	-1.83403	-0.356424	-1.7748	0.36602	-0.491415	-2.53583	-2.88627		4.06475	2.51945	1.87397	3.15562	1.97063	2.20704	0.53215	5.60834		1.3837			0.0398746	-1.30982	-2.31274	-0.0829542	-2.10557	-2.40631	-2.01219	3.2988	0.707974	-1.8791	-2.55951	-0.828867
nw>contig11097|size225|read59|cov12.19_58530	H-probe	0	-0.13533	0.0919493	0.89549	0	-0.391403	-0.321848	0	-0.890749	-0.84003	0	0	0	-0.136856	0.54819	0.403635	0	-1.77036	-0.321848	0.990922	-0.890749	-0.84003	0		1.03325	0.932795	1.67087	1.98429	1.56562	-1.77036	1.3805	1.16743		0.846018			1.04316	-0.168353	0.105365	-0.400107	0	-0.947668	-0.321848	0	-0.890749	-0.84003	0	0
nw>contig11101|size114|read94|cov30.31_2788	H-probe	0	0	-0.335367	1.2956	-0.883673	0	0	0	1.19655	0	0	-0.422548	0	0	0.456297	0	-0.883673	0	0	0	1.56267	0	0		0	0.724835	-0.948562	0	-0.883673	1.33492	0	0		0			0	0.75119	-0.321951	0	-0.883673	0	0	0	0	0	0	-0.422548
nw>contig11101|size90|read19|cov10.32_10532	H-probe	-2.02077	-0.507423	-0.521246	0	-0.883673	0.84832	-0.321848	0	0	-0.897016	-1.12948	0	-2.02077	0.779849	0.110377	1.31687	-0.0979114	0	1.25655	0	0	0.309261	-1.12948		2.56574	1.96999	1.2357	2.72865	0.322154	0	2.13984	1.16743		0.179454			0.0434961	0.243767	0.105365	0	-0.149427	0	-0.321848	0.706028	0.753132	-0.897016	-1.12948	0
nw>contig11102|size214|read38|cov8.31_143533	H-probe	0	-0.728149	0	-1.12595	0	0.552148	1.39934	0	0	-0.391157	-1.12948	0	1.03444	-0.728149	0	0.190915	0	-1.77036	0.250533	0	0	0.81512	-1.12948		0	-0.0033136	1.47761	0.141335	1.56562	-0.435445	1.71714	1.52063		2.05125			0	-0.728149	0	-1.12595	0	-0.947668	0.535498	0.706028	0	0.649226	-1.12948	0
nw>contig11104|size705|read380|cov20.25_27589	H-probe	0.809129	0.212271	-0.113245	-0.479388	1.28175	0.84832	-0.321848	0	0	-0.951837	0	-0.894544	-1.33857	-1.07715	-0.416164	1.21521	0	2.1025	0.673232	1.57285	0	-0.951837	0		-1.33857	0.487536	-0.354726	0.7879	1.56562	0	2.13984	1.52063		-0.951837			0.725698	-1.07715	-0.423569	0.798447	1.21851	0.822693	0.958197	0.395779	0.753132	0.686722	0	-0.894544
nw>contig11109|size81|read21|cov11.70_21535	H-probe	-3.11187	0.93041	-0.665349	0.388489	-3.94168	-1.64613	-0.553386	-0.0980096	1.14255	-2.00474	0	-0.602865	-3.11187	-0.701826	-2.0377	0.91676	-2.65008	-3.41218	-0.996468	-0.91049	0.284363	-0.798466	0		-0.737107	1.42759	0.330979	1.2371	-1.46312	-1.39597	-0.289197	-0.91049		0.437664			-3.11187	-0.241842	-1.41109	0.37589	-3.94168	-3.41218	-1.99155	0.0507336	0.912855	-2.00474	0	-0.602865
nw>contig11111|size288|read378|cov49.50_20792	H-probe	1.3981	1.26801	-0.0320949	0.069233	-0.54004	-0.391403	-0.983449	-0.196554	1.19655	-1.91604	0	-1.13705	0.159837	0.430758	0.203654	-0.82708	0.140205	-0.701223	1.00916	-0.53473	1.56267	-0.06211	0		0.575613	1.47429	1.41169	1.47155	1.52117	0.706752	0.718902	0.51534		-0.22999			-0.839847	0.128833	-0.232195	-0.866113	-0.603286	-0.427005	0.296596	-1.12987	1.24543	-0.277479	0	-1.13705
nw>contig11112|size655|read357|cov20.72_54093	H-probe	1.44127	-1.04891	-0.290142	-0.0499957	0	1.37896	1.43816	0	1.48006	0	0	0	0	-1.04891	-0.271715	-0.838591	0.785761	0	0.99508	0	-0.361446	0	0		0	-0.324076	0.227536	0.798614	0	0	0	0		0			0	-0.297722	0.158693	-0.0625941	0.734246	0	0	0.706028	0.391686	1.04038	0	0
nw>contig11115|size1629|read964|cov22.24_60494	H-probe	0	0	-0.521246	0	0	0	0	0	1.19655	0	0	0	0	0	-0.521246	0	0	0	0	0	0	0	0		0	2.09206	0.152271	0.768538	0	0	0	0.698714		1.07647			0	0	-0.521246	0	0	0	0	0	0	0	0	0
nw>contig11117|size127|read27|cov9.79_41539	H-probe	-0.579498	-1.30266	-0.526757	-3.03399	-1.41437	-0.922042	-0.513217	1.46957	2.12192	-1.18208	-0.492112	-1.2241	-2.02077	0.11164	-1.30268	0.167937	-1.15608	1.81241	-1.13632	-0.00870661	-0.693768	-2.22621	-4.03334		3.43576	2.30315	2.28287	2.37571	1.8682	3.33805	0.195483	4.37537		1.36938			0.0434961	-0.424246	-0.846032	-0.635023	-1.25373	-0.947668	-1.84888	1.87501	0.226646	-1.18583	-2.58883	-2.90664
nw>contig11118|size119|read67|cov20.10_5895	H-probe	0	1.28942	0	0.788596	0	-1.77036	0	0	0	0	0	0	0	0	0	0	0	-1.77036	0	0	0	0	0		1.03325	1.20503	0	0	0	-1.77036	0	0		0			1.04316	0	0	0	0	-1.77036	0	0	0	0	0	0
nw>contig11120|size416|read240|cov21.38_7596	H-probe	0	0.479698	0	0	0	0	0	0	0	-0.391157	0	0	0	-0.304515	1.06944	0	0	0	0.99508	0	0	-0.391157	0		2.04958	0.900517	0	0.768538	0.72539	0	0	0		-0.391157			0	-0.304515	0.626611	0	0	0	0	0.395779	0	-0.391157	0	0
nw>contig11120|size73|read13|cov8.88_9540	H-probe	-1.33811	0.525817	-1.9843	0.105219	-4.3751	-2.78422	-0.836855	-2.74553	-1.04943	-4.65943	1.02404	-4.58272	-2.06717	-1.4705	-2.16437	-0.925565	-2.9768	-4.12153	-0.523362	-1.80795	-1.28106	-1.46101	1.50223		2.50197	1.76766	0.466904	1.32955	-1.38641	-3.17034	-0.345877	-0.602525		0.946874			-1.04966	-0.799906	-2.30653	-2.1321	-3.68266	-4.12448	-1.88304	-0.119319	-1.50933	-0.862849	-1.60992	-1.62724
nw>contig11123|size94|read55|cov28.50_6541	H-probe	0.489184	-2.32691	-1.33781	-1.16774	-1.70875	-2.64402	-2.5427	2.40493	0.829977	-1.78493	-3.45781	-1.50381	-0.194378	0.536533	-1.52494	-0.851176	-1.83701	0.553635	-3.37752	0.0159145	-1.02298	-3.97906	-3.9485		3.20549	2.34465	1.71261	3.13371	1.77196	2.67278	-0.208199	5.13508		1.28391			-0.413389	-1.36594	-2.43444	-0.0549801	-1.87585	-2.47892	-2.55369	3.07892	0.846574	-1.79152	-3.06657	-2.06764
nw>contig11128|size92|read45|cov22.25_12543	H-probe	0.599066	-2.50361	-1.23649	-1.89203	-0.910448	0	-2.6194	1.06942	-1.65193	-0.611249	-6.03064	0.441374	0.355872	-0.155081	-1.79463	-3.85788	-0.687352	4.03338	-0.626784	0.401894	-1.51854	-0.703831	-6.03064		3.13054	2.28984	1.94292	1.49531	3.06895	6.37887	1.79262	3.47726		0.592439			-0.977609	-2.02377	-2.0754	-1.2057	-0.995033	1.34336	-0.217386	1.62815	-0.796645	-3.00315	-2.42289	-0.934718
nw>contig11129|size74|read35|cov21.93_14544	H-probe	-0.990252	0.677245	-2.18966	-0.402232	-4.95037	-2.85369	-0.770338	-2.32337	-0.442173	-5.42034	-0.420628	-4.00749	-1.49946	-1.21895	-2.16374	-1.90001	-3.15648	-4.17177	-0.222304	-0.768069	-0.852498	-1.65344	1.71673		2.4097	2.19475	0.354502	0.639171	-1.5244	-3.56735	-0.122252	-0.223595		0.762143			-0.930394	-0.337011	-2.39085	-2.48607	-3.84086	-4.35551	-1.627	0.417798	-0.858977	-1.19004	-2.88634	-0.423269
nw>contig11132|size70|read14|cov9.69_10546	H-probe	0	-0.128409	-1.42451	0.89549	0.778772	-0.922042	0	0	0	-0.983536	0	-1.13705	0	-0.129935	-2.0377	0.403635	0.785761	-1.77036	1.5784	0	0	0.222741	0		3.8685	2.90031	-0.280756	1.98429	2.91331	0.245856	1.70235	1.16743		1.72671			1.64223	1.78013	-0.975674	-0.400107	0	-1.77036	1.28005	0.395779	0	-0.983536	0	-1.13705
nw>contig11134|size93|read21|cov9.49_14547	H-probe	-1.33857	1.10705	-0.57228	-1.02387	0	1.37896	1.14256	0.81248	0	-0.391157	-1.64365	-0.602865	-1.33857	0.226864	-0.8752	0.292999	1.29161	1.06914	-0.295598	0.990922	0.983315	-0.391157	-1.64365		1.71912	3.25711	0.424048	1.70478	2.29868	2.82587	2.16609	2.72411		2.31909			-0.295407	-0.555822	-1.31802	0.253966	1.21851	0	2.10641	0.706028	0	1.2474	-0.199144	1.6837
nw>contig11136|size99|read62|cov26.49_27548	H-probe	-0.508129	-1.69074	-0.601774	-1.25147	0.486796	0.0576627	0.390567	0.752657	-1.95235	-1.37287	-2.28467	-0.678776	-0.852482	-0.406674	-0.727188	-1.42661	0.81274	1.25695	0.750212	-0.212002	-0.085599	-2.39753	-2.21107		2.65552	2.36161	2.46978	2.2523	4.38256	3.97499	2.53154	4.5049		1.08092			-0.332647	-1.3778	-1.17536	-0.575247	0.759178	-0.126913	0.245065	2.8086	0.251658	-1.37975	-2.58025	-4.7205
nw>contig1114|size101|read153|cov72.71_13554	H-probe	1.44127	0.884269	-0.81069	1.73379	-4.11519	-2.86809	-0.158258	-2.25046	0.0183264	-2.09816	0	-2.20618	0	0.32573	-0.506225	0.324354	-3.22856	-3.32523	-0.552177	-0.264096	-0.260504	-0.244238	0		3.96834	2.34261	1.12793	2.3948	-2.59527	-2.93037	-0.172329	-1.08303		0.837901			2.65619	-0.26783	-0.0909721	0.29661	-4.15971	-3.72951	-3.12893	-1.05907	0.530906	0.287844	0	-0.650632
nw>contig11145|size218|read44|cov10.06_145550	H-probe	0	2.37494	-0.872405	0	-2.78983	-0.391403	1.00779	0	-0.253327	-1.65579	0	-0.422548	0	1.12855	-0.853978	0.803741	-2.00406	-1.77036	-0.141011	0	0.729988	-1.65579	0		2.04958	2.89989	1.1822	1.26729	0.243477	-1.77036	-1.13609	1.16743		1.05446			1.04316	0.219364	0.181491	0	-1.57132	-1.77036	-1.13609	1.17799	0.499805	0.404366	0	-0.422548
nw>contig11146|size110|read33|cov15.02_30551	H-probe	-1.27795	1.11457	-1.63976	0.210988	-4.86037	-2.83973	-0.19205	-1.94636	-0.958964	-6.41964	-1.12948	-6.56662	-2.26221	-0.88362	-2.66712	-0.937259	-3.38373	-4.28271	0.0460141	-1.31312	-0.513171	-1.96555	2.48123		1.9166	2.41871	0.636275	1.37741	-1.69367	-3.52562	-0.0574397	0.248771		0.888334			-1.19176	-0.120691	-1.77371	-1.73056	-4.44917	-4.34632	-1.29758	0.739385	-0.928664	-1.29793	-0.23352	-0.777289
nw>contig11148|size203|read116|cov21.15_7899	H-probe	0	0	0	0	0	0.84832	0	0	0	-0.30955	0	0	0	0	0	0	0	0	0	0	0	-0.30955	0		0	0	0	0	0	0	0	0		-0.30955			0	0	0	0	0	0	0	0	0	-0.30955	0	0
nw>contig11148|size79|read19|cov12.25_19552	H-probe	0.298655	0.55987	-0.824638	0.313203	-4.10114	-2.99534	-1.06484	-2.55068	-0.0142873	-4.25612	-1.75515	-3.89624	-1.01782	-1.11515	-1.86025	-0.460887	-2.94128	-5.0866	0.105377	-0.691118	0.12238	-0.581802	1.85556		3.00163	2.15033	1.15127	2.24117	-1.58784	-3.302	-0.217517	-0.804045		0.53115			-0.104581	0.0965779	-1.23089	-1.31634	-4.31778	-4.10597	-1.60707	0.176513	-0.430202	-0.862296	-1.75515	-1.60968
nw>contig11151|size105|read17|cov8.12_34555	H-probe	-1.143	0.736742	-1.89467	0.257835	-4.40665	-2.75943	-1.07971	-2.10166	0.396978	-4.78069	1.17518	-3.90165	-1.44942	-1.13716	-1.57114	-0.862818	-2.95108	-3.7673	-0.686421	-0.881108	0.16178	-1.44878	2.09477		2.41705	2.26723	0.657391	1.45287	-1.30543	-3.06839	-0.283038	-0.16653		0.859216			-1.24804	-0.302634	-2.29776	-1.53171	-3.72324	-4.14526	-1.98098	0.281647	-0.156023	-1.17219	-1.65915	-0.791536
nw>contig11153|size210|read38|cov8.12_76556	H-probe	1.44127	-0.409447	-1.13297	-0.0151718	0	0.84832	1.43816	0.418609	-0.253327	-0.951837	-1.12948	0	1.03444	-1.19366	-0.676727	-1.68519	0.785761	0	1.99261	-0.91049	-0.253327	-0.951837	-1.12948		2.37476	1.44365	0.921641	0.88158	2.63849	1.33492	0	0.610144		0.124633			1.04316	-1.19366	-0.350112	-0.407352	0.734246	0.822693	0	-0.204462	0.499805	-0.951837	-0.23352	0
nw>contig11155|size163|read68|cov19.59_0558	H-probe	0	0.220385	-0.948562	0.0611143	1.28175	0.84832	-0.58483	0.81248	-0.93209	-1.10064	-1.12948	-1.2496	1.6307	-0.155211	-0.31694	0.0823846	0.785761	0	0.410251	0	-0.93209	-1.10064	-1.12948		1.62912	0.409854	1.24355	1.6397	2.47857	2.01622	1.11752	1.16743		-1.10064			1.64223	-0.691293	-0.321951	0.043352	0	0	-0.58483	0	-0.178958	-0.0602612	-1.12948	0.305952
nw>contig11159|size191|read41|cov10.53_108561	H-probe	2.1477	-0.519937	-0.2584	0.0202678	-1.42768	-0.00431392	-1.62945	-0.91049	-0.922143	-1.00141	0	-1.44257	2.05135	0.0193469	-0.82985	-0.252144	0.534319	-0.0939309	0.363161	0.0804323	-0.788746	-0.839259	0		2.04958	1.63013	1.3225	0.620024	1.91528	1.05551	0.832237	3.02783		0.664713			2.39038	-0.574214	-0.00411094	-0.00207319	-0.209172	-0.0452252	0.318001	0.80009	-2.01051	-1.00515	0.895964	-1.44257
nw>contig1116|size111|read93|cov40.20_51567	H-probe	-1.31817	0.759664	-1.90557	-0.297721	-4.84899	-3.06446	-0.962758	-2.55342	-0.966731	-5.73146	1.3224	-5.33298	-2.23284	-1.00627	-2.46638	-1.56401	-3.2813	-4.24036	-0.585553	-1.17094	-1.20602	-1.50789	2.63608		2.15471	2.25338	0.300219	0.94358	-2.02561	-3.54498	-0.726271	-0.563731		0.853494			-1.27714	-0.400526	-2.30876	-2.30087	-4.47866	-4.21772	-2.27452	0.127704	-1.39515	-1.15237	-1.9772	-1.08883
nw>contig11160|size92|read28|cov15.37_29562	H-probe	-1.55774	0.55433	-1.57208	-0.00859232	-4.64489	-2.74122	-0.976995	-3.01641	-0.767057	-5.49401	1.56245	-5.5836	-2.29512	-1.55181	-1.67015	-1.3433	-3.04447	-4.07122	-0.53604	-1.48167	-0.972839	-1.63799	2.25154		2.09236	1.90966	0.842798	1.24968	-1.7438	-3.21244	-0.529155	-0.619531		0.680766			-1.25952	-0.551198	-1.86715	-1.89629	-4.14206	-4.03361	-2.1997	-0.0469598	-1.25602	-1.14541	-2.78566	-1.55331
nw>contig11161|size73|read15|cov10.36_13563	H-probe	0.278079	-1.94637	-1.20719	-0.881045	-1.77351	-2.54132	-2.34519	1.79788	0.91685	-2.18852	-3.04269	-1.03103	-0.135208	0.330728	-1.60418	-0.677026	-1.8397	0.332106	-2.44415	-0.927001	-1.04573	-2.9751	-4.16794		3.85859	2.3493	1.98715	3.07895	1.76643	2.45989	0.168213	4.74608		0.876871			0.074391	-1.36461	-2.19795	-0.175849	-1.94404	-2.32452	-2.48919	2.58729	0.436105	-2.19571	-3.06951	-1.66839
nw>contig11163|size164|read155|cov35.13_95100	H-probe	-1.33857	-0.13533	-0.521246	1.67001	-0.883673	-1.77036	0	0.81248	0	-0.698565	0	-0.602865	0.712786	0.36773	0.110377	0	-0.883673	-1.77036	0.99508	0.990922	0	0.507712	0		-1.33857	2.32614	0.609628	1.93137	0.96968	-0.435445	1.70235	1.52063		0.987483			-0.295407	0.68905	0.540785	0.775997	-0.883673	-1.77036	1.28005	0.961223	0	-0.698565	0	-0.602865
nw>contig11166|size78|read43|cov27.53_0564	H-probe	-0.521711	-2.3468	-1.30419	-0.669625	-1.87348	-2.23059	-1.66987	1.83582	1.1922	-1.52118	-2.66003	-0.995675	-1.26336	0.22107	-1.50318	-0.802421	-1.77966	-0.417093	-1.82532	-0.466355	-0.55295	-2.69281	-4.29239		3.50972	2.17955	1.97173	3.16126	1.90102	2.14782	0.413474	4.99338		1.28298			-0.196535	-1.39948	-2.19445	0.0693321	-2.26553	-2.57299	-1.92677	2.66648	0.575999	-1.1305	-3.19429	-1.14834
nw>contig11167|size105|read19|cov8.15_38565	H-probe	0.0962444	-1.78033	-0.612289	-1.4294	0.351645	0.606421	1.50764	0.807147	-0.906066	-0.81356	-0.753217	-0.727379	-0.657063	-0.397004	-0.371982	-1.92885	0.469205	2.1462	1.39544	0.266234	0.344798	-2.21132	-2.90295		3.20391	2.47006	2.49108	2.15468	4.19421	4.54005	3.36851	4.13714		1.16633			-0.277393	-1.41925	-1.2218	-0.737426	0.656652	0.811256	0.0569253	2.11047	0.536617	-1.03259	-2.13518	-2.27468
nw>contig11168|size127|read21|cov8.17_20566	H-probe	0.666366	-1.6518	-0.0911766	-0.965355	0.373036	-2.03322	-0.287776	-0.312377	-0.00908745	-1.73681	-3.45116	-1.44257	-0.779713	-0.953189	-0.585693	-0.654931	0.596131	0.0319053	0.145092	-0.334972	-0.658912	-2.78093	0.159552		2.555	1.99584	2.4693	1.72173	3.57604	2.6425	2.12557	1.97818		0.350341			0.243636	-1.16405	-0.596934	-0.591534	0.0477289	-1.68705	-1.15162	0.208995	0.0629801	-1.14237	-2.00665	0.112981
nw>contig1117|size100|read106|cov50.10_1571	H-probe	-1.47223	1.15636	-1.32449	0.212271	-4.43359	-3.01263	-0.998739	-3.22261	-0.249237	-5.77685	0.68975	-4.07851	-2.03622	-0.970112	-1.85566	-1.03608	-3.09043	-4.08592	-0.569072	-1.07533	-0.157939	-1.61683	3.03409		2.23794	2.55178	0.999263	1.48365	-1.85338	-3.31728	-0.345319	-0.714488		0.901886			-1.27911	-0.208536	-1.92868	-1.46976	-4.32941	-4.2662	-2.17123	0.197548	-0.643785	-0.880158	-1.63648	-0.295655
nw>contig11170|size261|read81|cov14.81_137568	H-probe	0	0.784212	0	0	0	0	0	-0.999629	0	-0.30955	0	0	0	0	0	0	0	0	0	-0.999629	0	-0.30955	0		1.03325	0.724835	1.47761	0	1.56562	0	0	-0.999629		0.76692			0	0.75119	0.626611	0	0.734246	0	0	-0.999629	0	-0.30955	0	0
nw>contig11171|size147|read37|cov12.04_45569	H-probe	2.1477	-0.28151	0.292354	-1.27948	0	-0.391403	1.17738	-0.999629	-1.44536	-1.46853	0	-1.83878	2.05135	-1.06572	-1.57484	0.0373867	1.29161	-1.77036	1.31762	-0.999629	-0.46205	-1.46853	0		3.05769	1.57159	1.22209	1.28729	2.29868	0.706752	3.35647	1.04136		0.21752			1.04316	-0.314532	-0.948225	-0.503483	0.734246	-0.947668	-0.260777	-0.00744522	-0.692233	-1.46853	0	-1.83878
nw>contig11180|size588|read381|cov23.96_185102	H-probe	0	0	-0.903337	-0.838591	0	-1.77036	-0.807184	0	0	-0.391157	0	-0.894544	0	0.782686	-0.903337	-0.838591	0	-0.701223	-0.807184	0	0	-0.391157	0		0	0	-0.22982	-0.838591	1.20583	-1.77036	-0.807184	0		-0.391157			0	0	-0.903337	-0.838591	0	-1.77036	-0.807184	0	0	-0.391157	0	-0.894544
nw>contig11184|size171|read132|cov28.83_100103	H-probe	0	0.269098	-0.521246	0	0	-1.77036	0.853332	0	0.497602	-0.391157	0	0	0	-0.515114	0.110377	0	0.785761	-0.701223	-0.58483	0	-0.698952	-0.391157	0		0	0.209721	0.152271	0	0	-0.435445	-0.58483	0		-0.391157			1.04316	0.236076	-0.521246	0	0.734246	-1.77036	-0.58483	0.706028	-0.698952	-0.391157	0	0
nw>contig11194|size110|read47|cov20.49_50575	H-probe	-0.526306	-1.39387	-0.21909	-0.405343	0.225922	-0.578714	0.40548	1.75053	-1.05866	-1.21706	-1.13538	-2.1833	-0.357206	-0.710473	0.364938	-0.108595	0.496076	-0.578092	0.00707193	1.21557	-0.528837	-0.927147	-1.06123		2.78441	2.35498	2.70501	2.8875	3.4292	2.76403	2.66553	4.6332		1.38536			-0.414554	-0.933425	-0.818513	0.139801	-0.0520267	-1.07711	-0.122033	2.7592	-0.274118	-1.46563	-1.88206	-3.48766
nw>contig11197|size102|read19|cov9.50_23577	H-probe	-0.579498	-1.45899	-0.52693	-1.6167	-1.82302	0.300581	0.693614	-1.58447	0.379849	-0.698565	3.54123	-2.03414	-0.986331	-0.582822	-0.222465	-1.6167	-2.60179	-0.701223	0.833852	-1.58447	0.745968	-0.698565	0		2.62726	2.07357	1.91722	2.22802	0.995967	1.33616	0.957804	0.838142		2.01168			-0.378542	-1.00053	-1.89929	0.0327415	-1.02136	-0.947668	1.20291	-0.406477	1.08702	-0.698565	0.895964	-2.03414
nw>contig11198|size91|read28|cov14.65_24578	H-probe	-1.41453	1.14892	-1.28435	-0.196336	-3.60634	-1.43726	0.03889	-1.98323	-0.597945	-5.21649	-2.45948	-5.2633	-1.21023	-1.17118	-0.505843	-0.30861	-1.41748	-2.58859	0.846719	0.513962	0.26052	-1.69805	1.15123		2.25645	1.98702	1.15579	1.11853	-0.102011	-1.84048	1.00013	0.595968		1.28842			0.0409908	-0.183077	-0.838129	-1.96441	-1.66475	-2.00534	-0.769727	0.944703	-0.367426	-0.680924	-2.45948	-1.05735
nw>contig1120|size110|read259|cov110.99_47589	H-probe	-0.941205	0.243476	-1.73609	-0.0523721	-4.61468	-2.56424	-1.02926	-2.78373	-1.98356	-5.4151	-2.79473	-6.31241	-2.06546	-1.94751	-2.52833	-1.17158	-2.74072	-3.86413	-0.455824	-1.71717	-1.98275	-1.69643	1.75569		3.34842	2.00354	1.10974	1.29386	-1.53256	-2.72099	-0.952964	-1.13438		0.583494			-0.964381	-0.88401	-2.24338	-2.37688	-3.89595	-3.59024	-2.2492	-0.21054	-1.98951	-1.29438	-1.89877	-2.10647
nw>contig11200|size414|read103|cov11.91_351580	H-probe	0	-0.555822	0	-0.400107	0	0.84832	-0.260777	0	-0.253327	0	0	0	0	-0.555822	0	0.403635	0	0	0.734303	0	-0.253327	0	0		1.62912	0.169013	0.673517	0.368431	0.72539	2.01622	-0.260777	1.52063		0			0	-0.555822	0	-0.400107	0	0	-0.260777	0	-0.253327	0	0	0
nw>contig11201|size126|read35|cov13.21_1581	H-probe	0	0.261449	-0.628732	0	-1.42768	1.37896	-0.58483	-0.91049	0	-1.12012	0	-1.01498	0	-0.522764	-1.24193	0	-0.641916	0	0.993569	-0.91049	0	-1.12012	0		2.04958	0.682269	-1.24193	0.768538	-0.702288	0	-0.58483	-0.91049		-0.0436533			0	0.228426	-0.615316	0	-1.42768	0	-0.58483	-0.91049	0	-1.12012	0	-1.01498
nw>contig11202|size80|read22|cov12.88_15582	H-probe	-1.40608	0.940291	-1.5668	0.0734995	-3.33425	-1.27008	1.29635	-3.98846	-0.530486	-3.23309	0	-3.62594	-1.384	-0.657573	-0.886736	-0.40863	-2.08509	-3.12079	0.0716869	-1.41865	-0.458907	0.285358	0		3.31554	3.28717	2.57145	2.17687	-0.637601	-1.24395	-0.779683	-1.40724		1.66563			-1.63554	-1.16215	-1.18245	-1.55931	-3.42213	-2.08593	-0.215931	-1.46341	-0.893991	-0.357186	0	-0.495366
nw>contig11206|size100|read28|cov14.26_27585	H-probe	-1.62989	0.593617	-1.69145	0.0101851	-4.40903	-3.17467	-1.60593	-3.40475	-1.30905	-5.65142	0.54681	-7.5463	-2.71741	-1.7649	-1.56402	-1.71047	-3.12609	-4.1045	-0.908937	-1.79844	-1.51324	-1.78305	2.16266		2.28653	1.78276	0.722947	1.1418	-1.86397	-3.172	-1.20819	-1.18109		0.78909			-1.13934	-1.02077	-2.03928	-1.77488	-4.35443	-4.26915	-2.54385	-0.191921	-1.93312	-0.93776	-1.52393	-1.40021
nw>contig11207|size79|read31|cov18.06_1586	H-probe	-0.190696	-1.61777	-1.29095	-0.584051	-1.71085	-2.72186	-1.72684	2.40402	1.22725	-2.46719	-3.34153	-1.09548	-1.01835	0.572724	-1.0497	-0.842465	-1.86862	-0.30818	-2.32784	-0.89284	-0.771654	-3.34838	-3.45692		3.46443	2.59717	1.98724	3.25082	1.922	1.93663	0.610936	5.03238		0.66412			-0.620191	-1.14649	-2.34585	-0.077536	-2.1357	-2.52631	-1.73331	2.97506	0.721265	-2.12218	-2.70856	-1.09123
nw>contig11209|size75|read19|cov12.19_9588	H-probe	1.44127	0	0.0919493	0.788596	-1.82179	0	0	0	0	0	0	-0.602865	0	0	0.110377	0	-1.82179	1.06914	0	0	0	0	0		2.04958	1.20503	0.609628	1.26729	-0.615964	0	1.70235	0.698714		0			0	0	-0.521246	0	-1.08755	0	0	0.706028	0	0	0	-0.602865
nw>contig1121|size156|read466|cov139.22_18594	H-probe	-2.44245	-1.37577	0.555782	-1.71588	0.765499	-0.922042	0.630978	-0.999629	-1.72211	-0.96125	-3.4839	-1.90901	-1.83237	-0.88708	-0.502303	-1.93539	0.779433	1.67373	0.187896	-0.00870661	-0.73879	-0.750827	-3.4839		1.30947	1.69253	2.39195	1.52762	3.57604	3.51745	3.44336	2.37135		1.53546			-0.34675	-1.64798	0.198662	-1.34732	1.23111	1.06751	0.472861	1.18164	0.424302	0.271151	-1.64291	-1.90901
nw>contig11212|size106|read86|cov32.70_46104	H-probe	2.1477	0.808721	-1.29401	0.173467	-0.849267	0.84832	0.47623	1.3291	-0.93209	-1.83895	-1.12948	-1.90901	2.05135	-1.448	-1.02934	-0.179681	0.0768774	1.06914	1.03068	0	0.0512248	-1.83895	-1.12948		4.70702	1.71039	0.614673	2.82507	1.54257	2.47711	2.65531	3.28137		1.29232			1.64223	-0.0879748	-1.26781	-1.49655	-1.39677	0	-0.961932	0.706028	0.679717	-0.79857	-1.12948	-1.90901
nw>contig11213|size151|read31|cov9.07_17590	H-probe	-1.33857	-0.402968	-0.935834	-0.69198	-1.82302	2.72308	0.915549	0.709081	0.504378	-0.918635	-2.52387	-2.40014	0.712786	-0.615738	0.12218	-0.0222247	-0.183868	1.06914	0.87659	-0.00870661	-1.78125	-1.96276	-2.52387		3.11643	1.94278	1.87109	1.38347	1.45829	3.10652	2.36852	2.37135		0.479645			1.542	0.151454	-0.681544	-0.0772497	0.0554421	1.34336	-1.70016	0.366773	0.365162	-0.92238	-2.52387	-0.844586
nw>contig11214|size73|read14|cov8.68_13591	H-probe	1.44127	-0.906787	-0.0822289	-0.287217	-0.883673	0	-0.321848	0	-0.253327	-0.698565	-1.12948	-0.894544	1.03444	-0.906787	-0.385149	-1.07581	-0.883673	0	0.673232	0	-0.253327	-0.698565	-1.12948		0	1.18527	0.302365	1.49095	0.96968	0	1.3805	0.698714		0.987483			1.04316	-0.155596	-0.827973	-0.299815	-0.149427	0.822693	-0.321848	0.961223	-0.253327	-0.698565	-0.23352	-0.894544
nw>contig11217|size203|read43|cov10.00_140592	H-probe	0	0.0494614	-1.5457	-1.02387	-0.104901	1.37896	1.43816	0.81248	-0.361446	-0.30955	0	0	1.03444	0.0479354	-0.914078	-1.02387	-0.0979114	0	0	0	-0.361446	-0.30955	0		1.03325	0.470281	0.211249	-0.25533	-0.158283	0	1.70235	1.16743		1.80369			1.04316	-0.734751	-1.5457	-1.02387	-0.883673	1.34336	0	0	0.883987	1.32901	0	0
nw>contig11219|size96|read19|cov9.89_35593	H-probe	-1.5488	1.17846	-1.81309	0.635463	-4.72159	-2.72665	-0.860681	-2.53017	0.817114	-4.92538	-0.0606263	-4.17564	-1.83751	-0.860505	-2.03041	-0.365022	-3.08051	-3.92867	-0.6435	-1.20093	0.592558	-1.49006	2.54079		2.38656	2.59779	0.683382	2.02647	-1.50762	-3.22297	-0.442472	-0.399419		0.982035			-1.24313	-0.0451806	-2.11111	-1.2104	-4.02016	-4.02018	-2.08915	0.0991398	0.167095	-1.11857	-1.38118	-0.87428
nw>contig11223|size70|read26|cov14.87_2595	H-probe	-2.71407	-2.17966	-0.893121	-2.31754	-0.0664869	2.88815	-1.7997	2.42672	-0.472876	-1.56197	-7.47365	-0.387202	-1.09561	0.23764	-0.673486	-2.17415	-0.330191	5.45382	-0.724071	0.401894	-0.602392	-3.23788	-2.92323		3.12913	2.55294	2.77687	1.48245	3.44008	7.5093	1.4265	5.0693		0.949124			-0.618376	-1.9204	-2.46236	-1.64128	-0.793299	2.67377	-1.38997	3.35142	0.485522	-0.462781	-3.09517	-2.66551
nw>contig11227|size88|read28|cov16.01_23596	H-probe	-0.605638	-0.261323	-0.528326	-0.610026	-0.555277	0.0576627	1.8002	1.04634	-1.05749	-1.59996	-3.85803	-4.02978	-1.61992	-0.582126	-0.187635	-1.15208	0.616492	-0.334656	1.0528	0.28347	0.533931	-3.05146	-3.85803		3.52218	2.7039	2.12276	1.86559	3.20806	2.21862	2.87215	4.0153		0.69364			-1.24003	-0.118361	-0.618033	-0.352962	-0.316346	-1.17506	0.767074	2.41651	-0.101208	-0.376263	-0.729134	-2.47423
nw>contig11232|size73|read20|cov13.58_12597	H-probe	0	0	0	0	0	0.84832	-0.295598	-0.999629	-0.698952	0	0	0	0	0	0.631622	0.803741	0	0	-0.295598	-0.999629	-0.698952	0	0		0	1.20503	0	0	0.72539	0	-0.295598	-0.999629		0			0	0	0	0	0	0.822693	-0.295598	-0.293601	-0.698952	0	0	0
nw>contig11234|size114|read29|cov12.23_15598	H-probe	0.126928	1.47721	-1.13297	0.346897	-1.04302	-1.08967	0.12954	0.32947	0	-1.56297	0	-2.26092	0.355872	-1.42955	-0.0693425	0.371481	-0.530186	-3.41218	0.269777	-0.00870661	1.56267	-1.56297	0		2.36368	2.78948	0.921641	2.3729	0.816694	-3.41218	1.15307	1.24475		1.74022			-0.977609	0.179038	-0.684132	0.326324	-1.82179	-2.06883	1.09339	0.682753	0.753132	-0.522586	0	-2.26092
nw>contig11235|size220|read180|cov30.18_64105	H-probe	0	0.784212	-0.579908	0.388489	-0.883673	1.37896	0	0	-0.253327	0	0	0	0	0	0.0517139	-0.400107	-0.0979114	0	0	0	-0.253327	0	0		0	1.20503	0.550965	-0.400107	-0.158283	1.33492	0	0.698714		0			0	0	-0.579908	-0.400107	-0.883673	0	0	0.706028	-0.253327	1.04038	0	0
nw>contig11239|size166|read50|cov14.28_57600	H-probe	0	-1.67128	-0.591936	-0.400107	0	0	-0.260777	0	-0.468746	-0.698565	0	0	1.03444	-0.384011	-0.573508	-0.400107	0.785761	0	-0.260777	0	0.51457	-0.698565	0		1.03325	0.181054	-0.0742571	0.86718	1.85335	0	-0.260777	0.698714		-0.698565			0	-0.428613	-0.57852	0.37589	0.734246	0.822693	-0.260777	0.418751	-0.468746	-0.698565	0	0
nw>contig11246|size84|read29|cov17.35_16602	H-probe	0.0929341	-1.91163	-1.74131	-0.746116	-1.82908	-2.31244	-2.24129	2.08341	0.963324	-2.41334	-5.89742	-1.60959	-0.283199	0.446623	-1.59306	-0.895797	-1.71076	-0.0875953	-2.42395	-0.419531	-0.811818	-3.23909	-4.88823		3.68532	2.30126	1.49521	2.85433	1.94686	2.06028	0.30442	5.11434		0.784535			0.243133	-0.911565	-2.69506	-0.013845	-2.27691	-2.71701	-1.95922	2.83666	0.627672	-2.18506	-3.09774	-1.14834
nw>contig11247|size96|read23|cov12.20_22603	H-probe	-0.371846	0.775659	-1.573	0.0586016	-2.56715	-1.07878	0.189059	-1.22613	-0.543996	-3.52048	0	-2.80665	-0.287078	-1.10122	-1.8299	-1.52905	-1.05177	-2.22817	0.494318	0.0145675	-1.26812	-1.22116	3.61071		3.51276	1.86081	1.22959	1.5329	-0.70063	-1.45742	0.0205261	0.0259869		0.0751087			0.733079	-0.453514	-1.21423	-1.03402	-2.52997	-2.12312	-0.278445	1.01523	-0.737745	-0.644572	0	-1.2511
nw>contig1125|size299|read245|cov39.09_239610	H-probe	0.9542	0.939021	-1.61766	-1.77743	-0.648905	-0.219201	1.21195	1.3291	0.165457	-2.4489	-1.12948	-2.20618	0.845128	0.184476	-2.35839	-0.572354	0.237718	-1.47257	0.588854	1.57285	-1.13685	-2.4489	2.48123		1.36046	2.46517	0.631059	1.65032	2.31795	0.799657	3.15347	2.97336		1.14669			0.859802	0.666806	-1.92799	-0.621356	-0.693431	-0.0531368	-0.123714	1.69184	-0.508359	-2.4489	0.315027	0.0803783
nw>contig11251|size92|read21|cov11.00_2605	H-probe	-1.60447	0.825431	-1.6399	0.0162741	-4.67034	-3.1455	-1.22074	-3.66979	-0.428624	-5.70095	0.776024	-5.85192	-1.90166	-0.986172	-1.97214	-0.997083	-3.07733	-4.21186	-0.561311	-1.73472	-0.693178	-1.45813	2.52867		2.25334	2.25814	0.687574	1.5934	-2.02112	-3.41516	-0.634332	-1.35161		0.925479			-1.27944	-0.382873	-1.94126	-1.52257	-4.54716	-4.30707	-2.16419	-0.441315	-0.952648	-0.926456	-1.85643	-1.11505
nw>contig11252|size286|read131|cov20.79_222606	H-probe	0	-1.07095	-1.054	-0.238571	1.31115	0.84832	1.11631	0	-0.468746	-0.4244	3.54123	-1.02677	0	0.589429	0.00962309	0.459503	0.407933	0	-0.321848	0	-0.468746	-1.46853	3.61071		2.04958	1.71029	1.64378	2.37952	1.41501	1.33492	3.00256	2.58122		-0.392058			1.04316	-1.07095	-1.04059	0.115273	0.334833	0	-0.321848	1.8349	-0.468746	-0.428145	1.84099	-1.02677
nw>contig11253|size93|read17|cov9.16_3607	H-probe	-0.214905	-1.85056	-1.2329	-0.801532	-1.59558	-2.45971	-2.56018	2.04443	0.911374	-2.24264	-3.52048	-1.38886	-0.435703	0.6426	-1.67178	-0.877092	-1.68689	0.279003	-2.5652	-0.317183	-0.754974	-3.16378	-4.1997		3.61494	2.51941	2.04924	3.3222	2.03237	2.48706	0.152814	5.043		0.641544			-0.327694	-1.26101	-2.21547	-0.0152149	-1.97331	-2.17538	-2.43526	2.83738	0.468813	-1.92786	-3.01061	-1.45645
nw>contig11258|size122|read32|cov12.66_28609	H-probe	0	-2.01601	0.85111	0.0114329	-1.35225	1.37896	0.487983	0.54462	-1.42	0.769512	-1.64365	-1.2395	1.6307	-0.728742	0.110377	0.539704	-1.34526	1.67643	0.62822	-0.473415	0.142676	-1.62239	-1.64365		1.03325	-0.451326	2.27568	0.860043	-0.0378853	2.82587	0.752172	1.90664		0.0636614			1.64223	-1.26482	-0.521246	0.872278	-0.261498	0	-0.950179	0.0686878	-0.666865	-0.582003	-1.64365	-1.2395
nw>contig11260|size112|read26|cov11.79_49611	H-probe	-1.68629	0.639765	-1.59049	-0.139764	-4.4447	-3.03466	-1.579	-3.13378	-1.09273	-4.99284	2.37617	-4.59464	-2.37426	-1.21851	-1.12294	-1.59537	-3.12369	-3.95177	-0.826379	-1.31557	-1.36743	-1.80167	2.71224		2.11817	2.03408	0.855239	1.06565	-1.78241	-3.05232	-0.907146	-0.637641		0.610403			-1.45012	-0.614306	-2.06924	-1.7231	-4.19927	-4.18859	-2.57949	0.187432	-1.73797	-1.03796	-1.242	-0.682774
nw>contig11264|size102|read20|cov9.61_21612	H-probe	0.31572	-1.83113	-1.09253	-0.733208	-1.63223	-2.35261	-2.07509	1.83501	0.908668	-2.30582	-4.05188	-1.69756	-0.991125	-0.00547158	-1.11002	-1.0812	-1.56965	-0.437431	-1.97406	0.0213234	-0.701546	-1.67487	-3.04269		3.58715	2.07603	2.06095	3.04383	2.17662	2.02275	0.610538	4.80948		1.00366			-0.67462	-1.35932	-2.18413	-0.107765	-1.99477	-3.112	-2.07148	2.5314	0.083475	-1.86312	-2.21946	-1.60108
nw>contig11265|size75|read31|cov20.93_3613	H-probe	-2.10754	-1.56827	-0.935078	-0.515195	-1.62657	-1.04934	-1.96195	1.53782	1.61114	-1.6648	-2.67325	-0.853908	-0.489069	0.195827	-1.31671	-1.05523	-1.95798	0.178499	-2.00442	-0.141247	-0.361005	-2.85042	-6.21448		3.66623	2.46414	2.24081	3.11385	1.98157	3.06669	0.944434	4.02544		1.70421			-0.892612	-2.07273	-2.13006	0.222883	-1.66885	-2.61764	-1.66244	1.85907	0.784794	-1.99654	-2.60672	-0.785272
nw>contig11266|size203|read130|cov23.58_80106	H-probe	0	0	0	0	0	0	0	-0.999629	0	0	0	0	0	0	0	0	0	0	0	-0.999629	0	0	0		0	0	0	0	0	0	0	-0.999629		0			0	0	0	0	0	0	0	-0.999629	0	0	0	0
nw>contig11268|size82|read20|cov10.20_1615	H-probe	0.370804	-2.15546	-1.09692	-2.56697	-0.120168	-1.2721	-1.14204	1.71839	-0.706844	-1.29343	-3.79435	0.250736	0.11256	-0.0683897	-1.38701	-2.29059	0.186235	1.99524	-1.06707	0.125325	-0.476335	-2.23031	-3.72182		3.87354	2.41487	2.52387	1.56044	3.46892	4.55302	1.40761	4.2608		0.941956			0.199332	-1.6917	-2.24541	-1.64185	-0.54281	-0.126913	-1.26877	2.27579	0.0237201	-1.12981	-3.19703	-1.51249
nw>contig1127|size76|read97|cov60.83_2621	H-probe	-1.69541	0.926378	-1.57309	0.0890617	-4.96984	-3.12949	-0.972017	-3.38941	-0.360159	-6.78613	1.84254	-4.51871	-2.30634	-1.01987	-2.21394	-1.08501	-3.16248	-4.40646	-0.501533	-1.33387	-0.475122	-1.56598	3.27487		2.16773	2.38437	0.726365	1.58996	-2.07973	-3.36404	-0.449065	-1.22136		1.08841			-1.31319	-0.336406	-1.92123	-1.78215	-4.43227	-4.31878	-2.13973	-0.104441	-0.776946	-0.86131	-1.58778	-0.833355
nw>contig11270|size121|read22|cov8.17_60617	H-probe	-1.24221	0.832556	-1.87001	-0.253204	-4.8436	-3.05112	-0.992975	-2.65697	-0.805117	-6.01126	1.59545	-5.75249	-2.08565	-0.970581	-2.43214	-1.51968	-3.24165	-4.21336	-0.555275	-1.24009	-0.999617	-1.60278	2.98279		2.21251	2.32104	0.353835	1.06729	-1.97771	-3.53339	-0.809897	-0.612759		0.862296			-1.21011	-0.340722	-2.2619	-2.28095	-4.4839	-4.19525	-2.36675	0.0856304	-1.1863	-1.13961	-1.8536	-1.23278
nw>contig11275|size131|read31|cov11.41_13619	H-probe	-0.861598	-0.333163	-0.278249	-0.108665	-1.47489	-0.188288	0.309712	0.731702	-3.61827	-2.38569	-3.51591	-4.08586	-1.91037	-0.646564	-0.343433	-1.01405	-0.424455	-1.41885	0.909559	0.460709	-0.647598	-0.83446	1.03451		3.5728	3.1115	2.33521	2.98243	2.65974	2.06225	2.74957	4.52791		1.12376			-1.63057	-0.855204	-1.55599	-0.282288	-1.35729	-0.988827	-0.466198	2.63271	0.506946	-1.53664	-1.36425	-4.08586
nw>contig11278|size128|read35|cov12.32_2620	H-probe	-1.33857	-1.07715	-1.27781	0.388489	-0.648905	0	-0.321848	0	0	-0.391157	0	-1.01498	-1.33857	-1.07715	-0.646185	-0.400107	-0.641916	0	-0.321848	0	0	-0.391157	0		-1.33857	0.775185	-0.146934	0.368431	0.871005	0	-0.321848	0.698714		-0.391157			-1.33857	-0.325963	-1.27781	-0.400107	-1.42768	0	-0.321848	0	0	-0.391157	0	-1.01498
nw>contig1128|size133|read234|cov83.71_8629	H-probe	-0.68337	0.874057	-1.69377	0.256824	-3.06586	-1.20273	0.525224	-0.713172	-1.64816	-2.53349	0	-2.486	-0.454426	-0.654602	-1.12949	-1.85525	-2.11862	-2.47283	1.35276	-0.53473	-1.28204	-1.32721	0		2.51843	2.03657	0.80596	0.956507	-1.04626	-2.07797	0.0162418	-0.358221		1.18871			-0.766801	0.719875	-1.46889	-0.714321	-2.40336	-3.17871	-0.497995	1.00468	-0.698302	0.342418	0	-0.199444
nw>contig11280|size110|read30|cov13.36_0622	H-probe	-1.45155	1.07164	-1.2929	0.346913	-4.54319	-2.9978	-1.04642	-3.18795	-0.422248	-6.01478	1.69492	-4.43238	-2.20614	-1.01945	-1.62619	-1.00459	-3.16545	-4.03358	-0.557876	-1.00815	-0.467662	-1.54693	3.27252		2.23573	2.39048	1.06725	1.55225	-1.88756	-3.30095	-0.320831	-0.768514		1.1413			-1.33928	-0.294618	-1.73408	-1.50309	-4.36121	-4.2275	-2.03221	0.162643	-0.935976	-0.759065	-2.13617	-0.545129
nw>contig11283|size86|read19|cov11.27_26625	H-probe	-0.199471	-2.5553	-0.548056	-1.80206	-0.0597508	4.15449	0.339275	1.04909	-1.80934	-0.902354	-2.28904	-1.0728	-0.801787	-0.360409	-0.588955	-1.03949	0.891965	6.26255	0.54755	-1.42321	-0.0967836	-2.2514	-3.18378		2.77135	2.09991	2.45819	2.3862	4.02019	8.15079	2.37778	3.50336		0.840544			-0.331959	-1.36121	-1.81083	-0.430407	0.0778332	3.96397	0.0913012	1.74032	-1.04707	-1.35852	-2.65899	-2.6201
nw>contig11287|size105|read46|cov20.39_35627	H-probe	0.102703	-1.88515	-2.0991	-0.545147	-1.32004	-1.16275	-1.26194	1.70871	0.898527	-0.717278	-1.75515	-2.02829	-1.33857	-0.257401	-0.900078	-1.41142	-0.639795	-0.86528	-1.1217	0.990922	0.908042	-0.555128	-1.75515		2.18075	1.98314	1.08977	2.68427	2.72736	1.93833	0.62431	4.66102		-0.0753582			-1.33857	-1.4267	-2.84484	-0.270492	-1.38329	-1.19835	-2.7001	2.8155	-1.3871	-0.721023	-0.859185	-2.02829
nw>contig11289|size123|read41|cov16.62_3628	H-probe	-0.105299	-1.86206	-1.21329	-0.866366	-1.59137	-2.40861	-2.62386	2.04854	0.950542	-2.30526	-3.56148	-1.42995	-0.447227	0.65277	-1.64358	-0.893957	-1.70302	0.311636	-2.60225	-0.234614	-0.720294	-3.17255	-4.41591		3.68327	2.52673	2.06099	3.31419	2.02189	2.55241	0.0962829	5.05663		0.61215			-0.282309	-1.24039	-2.1819	-0.023357	-1.985	-2.13545	-2.40243	2.83366	0.43398	-1.95207	-3.01088	-1.46096
nw>contig1129|size74|read143|cov65.51_9636	H-probe	-0.0942539	-1.81359	-0.435204	-1.30514	0.664746	-0.566871	0.792492	0.601013	-2.1065	-0.948735	-4.05672	-1.42098	-0.923843	-0.546325	-0.49121	-1.29764	0.867803	0.843346	1.09696	-0.803067	-0.0630453	-1.90552	-3.04753		3.04351	2.42401	2.59904	2.05441	4.41689	3.18375	2.79889	4.18773		1.19926			-0.199745	-1.21943	-1.17191	-0.977326	0.383128	-1.01275	0.81245	2.36796	0.230385	-1.10047	-2.56006	-3.16404
nw>contig11292|size102|read128|cov54.07_24630	H-probe	0.164096	-2.31102	-2.16064	-0.560461	-1.54574	-2.18509	-3.5203	2.47244	0.3452	-2.26879	-3.50864	-1.28794	-0.782403	0.367574	-2.83126	-0.90199	-1.58689	0.219362	-3.11458	-1.02051	-1.14241	-3.26767	-3.77873		3.27024	2.30267	1.07686	3.16622	2.00592	2.56464	-0.774643	5.57756		0.602925			-0.491277	-1.63729	-3.33314	0.0011284	-1.86353	-2.01002	-3.20494	3.27394	0.56363	-1.74067	-3.47642	-2.08005
nw>contig11295|size108|read26|cov10.81_13631	H-probe	-1.33857	-0.894594	-0.976848	-0.534521	-0.883673	1.37896	0	-1.58447	-0.656138	-1.79177	0	-1.83878	-0.304129	-0.89612	-1.27977	-0.0062501	0.781723	0	1.99261	-0.0116215	-0.656138	-1.79177	0		2.18075	0.958501	0.318601	2.2071	1.20946	2.01622	1.70235	0.659915		-0.105728			1.05181	-0.927616	0.210388	-0.547119	0.696754	2.27606	0	-0.623244	0.0969943	-0.751392	0	-1.83878
nw>contig11298|size216|read64|cov14.13_93634	H-probe	0	0.276789	-1.51596	-0.400107	-0.883673	0.84832	1.11631	0	0	0	-1.12948	-0.422548	0	-0.507423	-0.884341	-0.400107	-0.0979114	0	0.673232	0	0	0	-1.12948		1.03325	0.697609	-1.51596	-0.400107	0.681945	0	-0.321848	1.16743		0			0	-0.507423	-1.51596	-0.400107	-0.883673	1.34336	-0.321848	0	0.753132	0	-1.12948	1.133
nw>contig11298|size836|read543|cov24.70_190109	H-probe	0	-0.304515	-1.31282	0.388489	0.778772	0	0	0	1.19655	-0.391157	0	-0.602865	1.6307	-0.304515	-1.31282	0.91676	0	1.06914	0	0	0	-0.391157	0		1.03325	0.900517	-0.639301	0.368431	0.72539	0	1.70235	0		1.29489			1.64223	-0.304515	-0.250787	0.37589	0	0.822693	0	0.395779	0	-0.391157	0	-0.602865
nw>contig11299|size286|read76|cov12.02_111635	H-probe	2.1477	0.0328187	-1.83186	0.890063	0.778772	0.300581	-0.807184	0.81248	0	-1.50565	1.89757	-1.90901	2.64191	-0.215637	-0.968446	0.371481	1.29161	-0.701223	1.99173	0	0	-1.50565	-1.64365		3.22851	1.942	1.36239	2.77967	3.43299	1.05551	0.895167	1.16743		0.607591			1.64223	-0.029477	-2.874	0.326324	1.21851	-1.77036	0.472861	2.17454	0.753132	0.554512	-0.747691	-1.90901
nw>contig11303|size223|read86|cov18.67_154638	H-probe	-1.0408	0.903893	-0.357908	-1.20945	-1.60675	-0.00505609	0.883275	-0.626458	0.729696	-0.907805	0	-2.5751	-0.105433	-0.812572	-0.98012	-0.511381	-0.720127	-0.439206	1.73077	-1.95556	-0.606726	-0.0980053	0		0.15788	1.64123	1.81411	1.59773	1.97908	0.799657	2.35663	1.7268		0.984134			-0.417809	0.2198	-0.326084	-1.22722	-0.27528	-1.71902	0.0194347	0.11441	-0.923966	0.434076	1.44451	-2.5751
nw>contig11305|size149|read83|cov26.56_56639	H-probe	-0.334377	-1.43348	-0.306944	-0.32235	-0.648905	-0.00431392	0.490475	0.709081	-2.13512	-1.82547	-1.12948	-2.69551	-0.43072	-0.602283	-0.263337	-0.29569	0.237718	0.332143	0.923343	1.30775	0.16002	-2.8696	-1.12948		3.25483	1.66566	2.31534	2.96945	3.4022	2.89422	1.96383	3.47181		0.587181			0.174121	-1.28825	-1.77268	-0.639919	0.441843	-0.0452252	1.37203	0.965409	-0.523312	-0.809445	-0.23352	-2.69551
nw>contig11307|size89|read28|cov14.18_4640	H-probe	-1.43189	1.35118	-1.68079	0.561105	-4.90751	-2.74687	-1.07613	-3.22288	0.0997237	-6.00992	2.18052	-3.51859	-2.03345	-0.715748	-2.05438	-0.673347	-3.08063	-4.23895	-0.61469	-1.47359	-0.109069	-1.41869	3.24753		2.2823	2.7163	0.733357	1.76462	-1.60226	-3.5093	-0.398991	-1.26484		1.03476			-1.41063	0.0568876	-2.16653	-1.44207	-4.09511	-4.24513	-1.9927	-0.293653	-0.372795	-0.830729	-2.09631	-0.875527
nw>contig11310|size135|read48|cov17.70_46642	H-probe	0	0.508306	0	-0.400107	0	-1.77036	-0.321848	0	-0.698952	0	0	0	0	-0.275907	0	-0.400107	0	-1.77036	1.25655	0	-0.698952	0	3.61071		0	0.929126	0.673517	-0.400107	0	-0.435445	-0.321848	0		0			1.04316	-0.275907	0	-0.400107	0	-1.77036	-0.321848	0	-0.698952	0	0	0
nw>contig11315|size102|read54|cov24.00_14644	H-probe	0	-0.0736222	-1.51596	-1.91037	0.778772	0	1.43816	0.81248	-0.860191	0	-1.12948	0.148239	0	-0.075773	-1.51596	-1.91037	0.785761	1.67643	0.99508	0	0.123124	0	-1.12948		3.05769	2.23342	1.79501	0.474024	2.91331	2.47711	0	1.16743		2.11324			1.04316	-1.36305	-0.119912	-1.13438	0	0	0	0.976786	0.385242	0	-1.12948	-1.5343
nw>contig11316|size78|read13|cov8.18_0645	H-probe	-1.37103	1.11983	-1.74669	0.109389	-4.78833	-3.02102	-0.971003	-2.83992	-0.568804	-6.12626	1.47483	-5.75284	-2.22562	-0.655807	-2.45404	-1.14058	-3.18231	-4.25773	-0.506732	-1.34957	-0.434623	-1.7792	3.45657		2.19039	2.53905	0.496327	1.4963	-1.90983	-3.57	-0.606185	-0.74161		0.91196			-1.08775	-0.115397	-2.11685	-1.83844	-4.49755	-4.16418	-2.29893	0.02623	-0.676829	-0.974908	-1.66148	-1.50935
nw>contig11320|size120|read46|cov18.11_24646	H-probe	-1.72358	0.566666	-1.47361	-0.238441	-4.40665	-2.73984	-1.16816	-2.86138	-0.882853	-5.59221	1.38197	-7.27746	-2.00326	-1.51661	-1.38425	-1.33033	-2.99683	-3.91127	-0.587777	-1.56938	-1.08487	-1.7748	2.62124		2.14114	1.88351	0.931162	1.12727	-1.64281	-3.17885	-0.65759	-0.638816		0.550056			-1.29103	-0.611867	-1.71089	-1.9418	-4.07028	-3.90285	-2.25758	-0.153085	-1.39491	-1.17208	-2.36158	-1.42668
nw>contig11324|size125|read39|cov13.71_3649	H-probe	-2.02077	0.615007	-1.92214	1.48762	0	-0.00431392	1.43816	0	0	0.476288	0	-1.13705	-2.02077	-0.56156	-1.29052	-0.479388	0	-1.77036	0.99508	0.990922	0	0.686711	0		-0.391647	0.953319	-0.16519	1.15782	2.09313	-1.77036	1.70235	2.24438		0.518831			-0.977609	-1.34425	-1.29553	0.29661	1.21851	-0.947668	2.40201	0.706028	1.61181	0.471343	0	-1.13705
nw>contig11324|size650|read359|cov20.55_20111	H-probe	0	-0.275907	0	0	0	0	-0.321848	-0.91049	0	-0.391157	0	-0.422548	0	-0.275907	0	0	0.785761	0	-0.321848	-0.91049	0.983315	-0.391157	0		1.62912	-0.275907	0	0.768538	0	1.33492	-0.321848	-0.91049		-0.391157			0	-0.275907	0	0	0	0.822693	-0.321848	-0.91049	0	-0.391157	0	1.133
nw>contig1133|size88|read112|cov61.69_2657	H-probe	-1.12412	0.741279	-1.82397	-1.30494	-3.39411	-1.31914	-0.570258	-1.04016	-1.80245	-4.24785	0	-3.03705	-1.15325	-1.33973	-1.7298	-2.24529	-1.48688	-2.7101	0.668659	0.74133	-0.770258	-1.60869	3.61071		3.30363	2.37834	0.931412	0.89722	-0.707509	-0.92109	0.173553	1.15608		0.480291			0.0896018	-0.197607	-1.46441	-2.85578	-2.56924	-2.0347	-0.56675	1.28512	-1.39315	-0.589693	0	-1.30042
nw>contig11331|size71|read15|cov10.28_9652	H-probe	-1.18258	0.593474	-1.46704	0.159893	-4.76474	-3.02343	-1.25786	-3.28006	-1.48568	-7.58841	0.10699	-3.56549	-2.49461	-1.43145	-1.49258	-1.1358	-3.17263	-3.84486	-0.67482	-1.71336	-1.84102	-1.65434	2.30074		2.35748	1.84822	0.931655	1.46197	-1.78907	-3.26062	-0.834272	-0.982125		0.609991			-1.2818	-0.656146	-2.09827	-1.72144	-4.22297	-4.20425	-2.46739	-0.288535	-1.98643	-1.11735	-2.21924	-0.388078
nw>contig11332|size84|read30|cov17.33_24653	H-probe	0.162408	-1.68824	-0.590677	-0.574313	0.499388	1.08077	0.823333	0.813733	-1.81598	-0.798001	-3.92999	-1.6207	-0.206551	-0.0763785	-0.350408	-0.902665	-0.176084	1.83062	0.728085	-0.249624	-0.596153	-1.86596	-2.3565		3.23342	2.36669	2.33926	2.49417	4.10174	4.70677	3.04517	4.37552		0.975884			0.325263	-1.12924	-1.55582	-0.345256	0.416519	0.56042	0.847203	2.41382	0.190777	-1.04253	-1.82538	-2.32398
nw>contig11333|size284|read249|cov32.62_13112	H-probe	0	1.66287	-0.521246	0	0	0	0	0	0	-0.391157	0	0	1.03444	0	-0.521246	0	0	0	0.99508	0	0	-0.391157	0		1.03325	0.724835	-0.521246	0	0	0	1.70235	0.698714		-0.391157			0	0	-0.521246	0	0	0	0	0	0	-0.391157	0	0
nw>contig11337|size93|read38|cov17.68_2656	H-probe	-1.19912	-1.86432	-1.21585	-0.751591	-1.75075	-1.76167	-2.09299	1.62896	1.04717	-1.33967	-3.45757	-0.785563	0.623709	0.44597	-1.24623	-1.27185	-2.18801	-0.417866	-2.24033	0.195104	-0.924977	-2.73321	-6.99879		4.34796	2.56013	1.98625	3.2044	2.12903	2.27344	0.10958	4.65658		1.7097			-0.956438	-1.66885	-2.57469	0.0644949	-1.94394	-2.87518	-2.21972	2.43191	0.454333	-1.34618	-2.62031	-0.964309
nw>contig11349|size83|read22|cov13.30_17661	H-probe	-1.86598	0.898631	-1.35224	0.184229	-4.41784	-2.99022	-1.36849	-3.03855	-0.887394	-6.4671	1.50101	-4.43984	-1.99556	-1.08893	-1.21765	-1.33077	-2.98494	-3.84387	-0.827018	-1.53935	-1.19643	-1.86104	2.92109		2.25387	2.27198	1.06398	1.40389	-1.70072	-3.03192	-0.924029	-0.8778		0.701394			-1.10481	-0.377581	-1.82864	-1.55367	-4.27095	-4.19448	-2.41813	-0.0568945	-1.49198	-0.965897	-1.4878	-0.918348
nw>contig11354|size1147|read801|cov26.05_754113	H-probe	0	-0.304515	-0.903337	0	0	0	0	0	-0.253327	0.345563	0	0	0	0.982758	-0.271715	1.31687	1.29161	0	0.99508	0	0.729988	0.507712	0		0	1.26017	-0.903337	0	0	0	0	1.52063		-0.698565			0	-0.304515	0.158693	0	1.21851	1.72514	0	0.724583	0.499805	0.341818	0	0
nw>contig11354|size127|read34|cov12.10_25663	H-probe	0	0.22839	-0.199783	-0.777163	-1.82179	1.76605	1.14256	0	0	-1.37862	0	-1.2496	2.05135	0.73145	0.434893	-0.777163	-0.530186	0	0.699482	0	0	-1.37862	0		3.51932	1.29652	0.515022	1.39843	-0.256174	2.01622	1.40675	1.52063		-0.30215			1.64223	0.195368	0.154124	-0.777163	-1.82179	0	0.984447	0	0	-1.37862	0	-1.2496
nw>contig11355|size120|read92|cov28.27_15114	H-probe	-1.33857	1.66287	-0.521246	0.892851	0	0.84832	0	0	0	-0.951837	0	0	-1.33857	0	0.54819	-0.777163	0.785761	0	0	0	1.56267	-0.951837	0		2.42266	2.9121	0.956364	0.490124	2.09313	1.33492	1.70235	0.698714		0.124633			-0.295407	0.75119	-0.521246	-0.777163	0	0	0	0.706028	0	-0.951837	0	0
nw>contig11358|size116|read23|cov9.47_15666	H-probe	-1.0408	-1.49547	0.778469	0.212094	-1.82179	-0.00431392	2.64882	0	-1.71929	-1.37862	-1.12948	-2.9798	0.159837	-0.0775276	-0.471206	0.53575	-1.03603	-1.77036	1.25655	0	-1.71929	-0.172343	-1.12948		1.27916	2.12863	2.2168	2.70276	1.77597	1.57101	3.00256	3.18583		1.33163			-0.417809	-1.52849	-0.814034	-0.180086	-1.82179	-0.947668	0.958197	0.961223	-1.71929	-1.37862	-1.12948	-2.9798
nw>contig11360|size132|read155|cov43.30_37115	H-probe	0	0	-0.579908	0.788596	0	0	0	0	0	-0.968853	0	0	0	0	0.0517139	0	0.785761	0	0	0	0	-0.968853	0		0	0.724835	0.0936087	0	0	0	0	0.698714		-0.968853			0	0	0.0467027	0	0	0	0	0	0	-0.968853	0	0
nw>contig11360|size71|read16|cov10.38_0668	H-probe	1.08529	-2.33269	-1.38528	-1.69028	-1.31404	-1.79516	-3.0165	3.00334	0.569334	-0.984315	-3.61655	-1.82083	0.523855	0.416721	-2.05993	-1.09899	-1.49189	1.09344	-2.5528	-0.568872	-0.92636	-3.55892	-3.54402		3.84775	2.24341	1.88456	2.48355	1.90266	2.71471	-0.239011	5.49218		1.05354			0.432322	-1.68208	-2.14248	-0.256109	-1.49565	-1.95283	-1.75932	3.24314	0.333676	-1.23316	-2.69114	-2.28117
nw>contig11362|size101|read36|cov17.54_11670	H-probe	0.080809	-2.29084	-0.993195	-0.796018	-1.55308	-1.99384	-1.90088	2.08318	1.16277	-1.15277	-1.62129	-1.27988	-0.599704	0.312648	-1.13016	-0.971153	-1.51052	-0.768688	-1.77102	-0.266304	-0.128916	-1.89075	-7.38173		3.62387	2.55161	2.03032	3.21056	2.08048	2.23732	0.748641	4.81056		1.68155			-0.293265	-1.66693	-2.49818	0.118442	-2.54469	-3.16313	-1.80944	2.74549	0.373194	-0.698858	-3.06423	-0.994473
nw>contig11366|size1252|read709|cov21.29_1080117	H-probe	0	1.01352	0	0	0	0	-0.260777	0	0	0	0	0	0	-0.275907	0	0	0	0	-0.260777	0	0	0	0		0	0.448929	0.673517	0	0	0	-0.260777	0		0			0	0.475284	0	0	0	0	-0.260777	0.706028	0	0	0	0
nw>contig11366|size206|read59|cov12.93_60672	H-probe	-1.6706	-1.3904	-1.54891	-2.06165	0.778772	-0.922042	-0.961932	0.81248	-0.505608	0.347224	0	-2.45248	-1.06051	-1.39193	-0.685496	-0.367052	1.6654	-1.77036	-0.961932	0.990922	-1.70216	-1.29628	0		0.269363	1.07107	0.803917	1.55385	3.0333	1.33616	-0.961932	1.80415		1.14613			-1.46964	-0.931945	-1.195	-0.783816	1.21851	-0.0452252	-0.961932	1.68238	-0.94903	-1.29628	0	-2.45248
nw>contig11367|size140|read132|cov36.63_29118	H-probe	1.44127	0.639171	-0.054948	0.0755939	-0.104901	1.37896	1.14256	0	0	-1.62239	0	0	1.03444	-0.27856	0.180801	-0.713002	1.07832	1.06914	0.699482	0	1.56267	-1.62239	0		4.31028	2.31259	1.69894	1.85376	2.14963	2.82587	2.16609	2.04099		1.08786			1.64223	-0.323163	-0.255048	0.936439	1.22657	0.822693	-0.295598	0	0.753132	-1.62239	0	0
nw>contig11368|size98|read41|cov20.42_37673	H-probe	-2.62194	1.40619	-1.59401	-0.559481	-3.35642	-1.20546	-0.0372266	-2.26136	-0.822091	-4.53641	-2.52387	-3.6497	-1.83352	-0.580763	-1.0923	-0.681028	-1.41842	-3.04164	0.213064	-0.840659	-0.313935	-1.62241	-2.52387		2.61836	2.88488	1.43291	1.30279	0.0108888	-1.75883	1.24527	-0.142406		1.49292			-1.34651	0.417243	-1.66742	-1.52088	-1.53966	-2.0256	-0.460114	-0.141698	-0.184391	-0.654939	-1.07936	-1.28647
nw>contig1137|size88|read159|cov87.69_5680	H-probe	-1.35651	1.0056	-1.49268	-0.019807	-4.99641	-3.17422	-1.00645	-3.0296	-0.317169	-6.13797	2.12317	-5.7593	-2.19262	-0.919708	-2.21044	-1.20084	-3.0221	-4.31106	-0.541757	-1.51732	-0.718212	-1.54263	3.50025		2.21041	2.33445	0.665104	1.33293	-2.02493	-3.5968	-0.496124	-1.29863		1.07809			-1.06129	-0.281169	-1.92172	-1.91003	-4.56308	-4.36028	-2.17809	-0.186028	-0.966285	-0.961063	-1.48099	-1.21882
nw>contig11371|size179|read43|cov11.82_39675	H-probe	2.1477	0.869418	-1.48597	-0.732501	0.373036	-0.00431392	1.00779	0.81248	-1.76104e-05	-0.564273	0	-1.35399	1.03444	-0.552899	-2.09916	-0.0344274	-1.03603	-1.77036	1.17796	0	0.778328	-0.564273	0		0	1.80724	0.0929517	1.09937	1.42515	-1.77036	1.3256	0.698714		2.14598			2.06426	0.273007	-1.47255	-1.2521	-0.241365	-0.947668	-1.13609	1.3664	-1.19657	-0.564273	0	-1.35399
nw>contig11373|size152|read64|cov19.66_78676	H-probe	-2.02077	0.423398	-0.49948	0.248762	-0.648905	0	1.43816	0.81248	-0.253327	-1.19456	-1.64365	0	-2.02077	-0.99892	-0.656688	-1.71825	0.534319	1.06914	0	0.990922	-0.253327	-1.19456	-1.64365		1.74046	1.96272	0.98733	1.72132	1.60563	2.47711	0	0		0.918676			0.635426	0.568632	-0.895152	-0.94225	-0.693431	0.822693	0	0	-0.253327	-1.19456	-1.64365	0
nw>contig11376|size117|read97|cov30.86_2120	H-probe	0	1.96314	-1.73601	-0.39944	-2.13102	1.76605	-0.983449	-0.713172	0.272501	-1.13528	0	-1.01498	0	-0.160944	-0.443648	-1.18804	-1.34526	1.06914	0.0116311	-0.53473	-0.585688	-1.13528	0		2.04958	0.261402	0.0194806	0.449171	-0.277666	0	0.718902	-1.52565		-1.13528			2.06426	1.89404	-0.257129	-1.18804	-0.912513	1.34336	-0.983449	-0.533469	-1.569	0.924882	0.895964	-1.01498
nw>contig11376|size489|read123|cov11.95_429677	H-probe	0	0	0	-0.400107	0	0	0	0	0	0	0	0	0	0	0	-0.400107	0	0	0	0	0	0	0		0	0	0	-0.400107	0.72539	0	0	0		0			0	0	0	-0.400107	0	0	0	0	0	0	0	0
nw>contig11379|size92|read40|cov20.67_14679	H-probe	0.0361734	-2.22493	-1.03752	-0.430489	-1.69205	-2.06429	-2.13176	1.97043	1.29338	-1.81101	-2.57647	-1.64676	-0.178393	0.323959	-1.23156	-0.558938	-1.74931	-0.255885	-2.22247	-0.21035	-0.406692	-2.6245	-3.07929		3.47198	2.19898	2.03838	3.19323	2.04069	1.98204	0.448067	5.09193		1.10491			-0.293166	-1.55078	-2.21093	0.105064	-1.95148	-2.45903	-2.25715	2.87857	0.411887	-1.32552	-2.39868	-1.89392
nw>contig1138|size106|read164|cov77.29_2685	H-probe	-1.75962	0.923294	-1.47043	0.0924342	-4.91463	-3.11837	-0.910708	-3.24085	-0.273086	-6.69172	2.29564	-4.74689	-2.2967	-0.946125	-2.21752	-1.0407	-3.12958	-4.39652	-0.442931	-1.21438	-0.370539	-1.64987	3.74144		2.19616	2.41681	0.781309	1.69149	-2.04728	-3.4032	-0.415531	-1.2422		1.09864			-1.24767	-0.276865	-1.82269	-1.79634	-4.44145	-4.311	-2.01782	0.0880443	-0.612408	-0.839807	-1.06333	-1.08301
nw>contig11387|size93|read27|cov14.80_1683	H-probe	-1.40118	0.627707	-1.79318	-0.375775	-4.71188	-2.95905	-1.08531	-2.54384	-1.09773	-7.52717	1.97544	-5.7396	-2.1712	-1.08586	-2.71697	-1.78707	-3.0903	-4.17338	-0.542965	-1.22586	-1.28057	-1.73123	2.97054		2.24366	2.22113	0.421992	0.839087	-1.83497	-3.49151	-0.845803	-0.393121		0.759612			-1.02041	-0.415877	-2.17272	-2.52517	-4.22464	-4.16988	-2.32533	0.224307	-1.39643	-1.14296	-1.7922	-1.29446
nw>contig1139|size80|read28|cov17.85_17693	H-probe	-1.6433	0.961884	-1.57681	-0.0257511	-4.70168	-2.93481	-1.16634	-2.74027	-0.471	-5.99518	-0.838192	-5.17094	-2.06907	-0.939581	-2.15809	-1.09657	-3.13681	-4.17704	-0.567096	-1.51488	-0.585081	-1.8755	2.11532		2.20819	2.31095	0.713548	1.26393	-1.82099	-3.36178	-0.602577	-0.430106		0.717217			-1.16015	-0.302025	-1.88181	-1.75397	-4.33408	-4.16982	-2.16445	-0.0277168	-0.870705	-1.18485	-3.65922	-1.22915
nw>contig11391|size103|read20|cov9.43_43686	H-probe	0.126928	-0.17788	-0.57701	-0.2066	0.398079	-0.00536368	1.09297	2.65388	-0.363124	0.317897	-2.74157	-1.12411	0.621142	-1.03881	-0.756976	-0.176691	2.15897	-1.97249	0.921207	1.57285	-1.66543	-1.1336	-2.74157		3.21311	2.13405	1.48654	2.24672	4.04236	0.978618	2.19098	4.38804		1.1169			0.635426	-0.758022	-1.19058	0.329955	1.43281	-1.69827	0.0697504	3.16264	-1.40332	-0.70132	-0.90058	-0.520088
nw>contig11391|size153|read102|cov25.24_56121	H-probe	-1.33857	0.784212	0	0	0	0	-0.321848	0	-0.253327	0	0	0	-1.33857	0	1.06944	0	0	0	-0.321848	0	-0.253327	0	0		-1.33857	0	0	0	0	0	-0.321848	0		0			-1.33857	0	0	0	0	1.34336	-0.321848	0	-0.253327	0	0	0
nw>contig11394|size363|read71|cov9.06_98688	H-probe	0	-0.275907	0	0	-0.883673	0	0	0	0	-0.30955	0	0	1.6307	0.50678	0	0	-0.883673	0	0.99508	0	0	-0.30955	0		1.03325	1.81615	1.13087	0.768538	-0.883673	2.01622	1.70235	0.698714		0.76692			1.04316	0.475284	0	0	-0.883673	0	0	0	0.753132	0.730832	0	0
nw>contig11395|size190|read47|cov11.22_2689	H-probe	1.23895	1.05956	-1.30171	-0.141102	-1.8238	-0.780678	-0.212344	-1.07309	-1.42628	-3.04316	0	-2.5436	1.36257	0.628465	-0.766071	-1.59382	-0.201578	-1.25283	1.33511	-1.20896	-1.70511	-1.83689	0		1.84773	1.7072	0.941678	0.934027	0.401954	-0.844726	2.05579	-0.977655		-0.107098			2.05912	1.65945	0.423713	-1.26125	-0.0245375	-0.597297	0.669213	-0.522427	-0.73219	-0.983007	0	-2.5436
nw>contig11396|size232|read48|cov10.16_88690	H-probe	0.102703	0.913754	-0.948562	-0.400107	0.778772	0.84832	1.88311	-0.187148	-0.562343	-0.983536	0	-1.02677	0.292132	-0.749114	0.956993	-0.400107	0.785761	0	0.734303	-0.00870661	0.420972	-0.983536	0		2.04266	2.16298	1.24355	0.86718	2.63849	2.01622	2.20091	0.521005		0.0929336			-1.33857	0.00207557	0.113468	0.37589	1.21851	1.34336	1.01927	-0.603849	-0.562343	0.0568464	0	0.528779
nw>contig11397|size368|read96|cov12.30_196691	H-probe	2.1477	0.820952	0.957154	1.18892	1.28175	-0.391403	0.719041	0.32947	0.379849	-0.0829038	3.54123	-0.894544	1.6307	-0.489918	1.42109	1.56564	0.785761	1.34854	1.27349	1.57017	-0.816705	-0.520131	0		0	-1.77719	-0.604291	-1.23448	0	-1.77036	-0.719121	0.167802		-1.72641			1.64223	0.754444	0.118243	1.78766	2.31648	0.256374	1.22833	0.231238	0.428727	0.33375	3.60775	-0.894544
nw>contig11398|size208|read67|cov15.46_10692	H-probe	0	0.784212	-0.948562	0.309208	0	0	0	0	1.19655	0	0	-0.602865	1.03444	0	-0.948562	-0.479388	0	0	0	0	0	1.20628	0		0	0	-0.948562	0.289151	0.72539	1.33492	1.70235	0		0			2.06426	0	-0.321951	0.29661	1.21851	0	0	0.395779	0	0	0	-0.602865
nw>contig11401|size295|read82|cov13.30_120694	H-probe	-1.33857	-0.677042	-1.01634	-1.82188	0.398079	2.32251	-0.562987	0.81248	-0.860191	-0.252153	0	-1.2496	-0.304129	-0.679193	-0.989046	-1.01814	0.781723	0	1.75106	0	0.123124	0.557647	0		2.52993	2.14772	1.81769	2.15763	2.45929	2.01622	3.05426	2.42261		1.63979			-0.295407	-0.357873	-0.163307	-0.172442	0.334833	0	0.717058	1.70124	-0.860191	0.342278	0	0.305952
nw>contig11404|size72|read18|cov10.58_11696	H-probe	0.137761	-1.25107	-1.51382	-1.13095	-0.990933	-2.03322	-2.79475	1.96496	0.022449	-0.869458	-0.783961	-0.536095	-1.44764	0.0907171	-1.36749	-0.953697	-0.135685	0.521046	-2.62459	0.573217	-3.30573	-3.52723	-5.82507		2.97445	2.31978	1.64843	2.47996	2.44948	2.76897	0.182986	5.32461		0.612976			-0.0916965	-2.91517	-1.97275	-1.3188	-0.966015	-1.13613	-2.99118	2.88223	-0.46395	-1.46708	-3.41792	-0.698309
nw>contig11407|size179|read83|cov20.54_17698	H-probe	-0.477238	-1.59379	-0.553623	-0.791554	-0.486414	1.70122	0.607397	2.05612	-1.87234	-1.6711	-3.0307	-0.707776	-0.675042	-0.364964	-0.259373	-0.879299	-0.431233	1.9289	0.362948	0.88765	-0.0488552	-2.19118	-2.96121		3.79286	2.49499	2.78737	2.72345	3.71313	4.98655	2.77764	5.11802		1.36622			-0.242759	-1.79071	-1.70736	-0.295192	-0.514258	1.12961	0.432145	3.04773	0.0220699	-0.938241	-1.32337	-2.46294
nw>contig11408|size275|read72|cov12.65_19699	H-probe	0	1.28942	0.0919493	0.788596	-0.883673	0	0	0	0	0	0	0	0	0.782686	-0.521246	0	-0.883673	0	0.99508	0	0	0	0		2.63995	0	-0.521246	0.768538	1.59489	1.33492	0	0		0			1.64223	0	0.105365	0	-0.883673	0	0	0	0	0	0	0
nw>contig11410|size76|read23|cov14.17_16700	H-probe	-0.386286	-0.795366	0.297925	-1.19982	0.509979	-0.504971	0.835264	1.70871	-0.392265	-1.41809	-3.09786	-2.61766	-2.25302	-1.136	-0.843153	-0.96047	0.378317	-0.1177	-0.313542	0.990922	-0.605504	0.0831859	-3.09786		2.9888	2.74783	2.88492	2.40922	3.90164	2.1291	2.30862	4.25313		1.32795			-1.00315	-1.82197	-0.526157	0.0429211	-0.0690392	-2.21893	0.638832	2.27204	-1.58882	-2.02121	-0.946196	-2.61766
nw>contig11411|size73|read15|cov9.68_4701	H-probe	-1.92425	1.05862	-1.841	0.132537	-5.01235	-2.7095	-1.15029	-3.91254	-0.355278	-5.72019	2.30559	-3.34326	-2.14258	-0.986697	-2.33586	-1.04404	-3.02458	-4.08435	-0.865437	-2.00144	-0.376706	-1.69026	1.97515		2.41294	2.41094	0.630934	1.66176	-1.6049	-3.65083	-0.80876	-1.75146		0.659987			-1.36825	-0.222357	-2.25335	-1.67121	-4.12663	-4.17871	-2.1362	-0.609407	-0.757972	-1.22698	-1.29857	-1.25891
nw>contig11412|size355|read99|cov12.84_226702	H-probe	0	0.749473	0.0919493	-0.585879	0.778772	0	1.17738	0.81248	-0.93209	-0.30955	-1.75515	-0.894544	1.6307	0.077492	-0.521246	-1.88148	0	1.06914	-0.260777	0	-0.93209	-0.30955	-1.75515		2.04958	1.08778	1.46963	-0.244269	2.47857	1.33492	1.44157	2.24438		1.80369			0	-1.20978	-0.521246	-1.10548	0	0	-0.260777	0	-0.178958	-0.30955	-0.859185	-0.894544
nw>contig11414|size220|read39|cov8.58_68703	H-probe	0	0.784212	0	-0.400107	0	0	0	-0.999629	0	-0.391157	-1.12948	-1.02677	0	0	1.40486	-0.400107	0.785761	2.1025	0	-0.999629	0.983315	-0.391157	2.48123		1.03325	0	1.13087	0.368431	0.72539	0	0	0.167802		-0.391157			0	0.75119	0.626611	0.37589	0	0	1.28005	-0.293601	0	-0.391157	-1.12948	-1.02677
nw>contig11416|size97|read20|cov9.81_0704	H-probe	1.44127	0.756082	0.093582	-1.15815	0	1.37896	-0.58483	0	0	-0.951837	0	-1.02677	0	-0.1241	-0.31694	-1.94674	0.785761	0	-0.58483	0.990922	0	0.25444	0		3.05769	1.39078	0.808387	0.228851	2.09313	1.33492	-0.58483	1.52063		1.1614			0	-0.906787	-0.948562	-1.94674	1.21851	1.72514	-0.58483	0	0	-0.951837	0	-1.02677
nw>contig11417|size165|read41|cov12.36_1705	H-probe	0.492895	0.285695	-0.157639	0.0186651	1.06593	-1.69339	1.11631	-1.58447	0.727809	-1.27081	0	-3.12618	0.159837	-0.418921	-0.543582	0.342322	1.88017	-2.54171	-0.321848	0.401894	-0.468746	-1.27081	0		2.04018	2.50578	2.41177	3.02807	3.1764	0.799657	3.2954	1.60136		0.842423			-0.0916965	0.216592	-0.553311	1.37079	1.22657	-0.816574	0.958197	0.372746	0.776687	-0.230431	0	-3.12618
nw>contig1142|size76|read165|cov100.76_0711	H-probe	-1.47514	0.608904	-1.29208	-0.807515	-3.71355	-2.13747	0.491962	-0.859954	-0.93998	-4.1424	-2.19011	-3.96072	-2.79996	-1.36032	-1.78682	-1.89691	-1.97615	-2.59054	1.00921	-0.885783	-0.212264	-0.997623	-2.19011		2.20162	2.37857	1.33755	0.588048	-0.493	-1.9361	0.621785	-0.066956		0.956308			-1.29009	-0.455038	-1.55717	-2.50741	-2.49968	-2.31661	-1.53343	0.0841571	-1.06255	-0.748579	-2.19011	-0.830143
nw>contig11420|size94|read53|cov26.64_6706	H-probe	0.140418	-2.00967	-1.16293	-1.05053	-1.62976	-2.13342	-3.07288	2.31456	0.440219	-2.11575	-2.94119	-1.66213	-0.00837127	0.446458	-1.52386	-0.832186	-1.71498	0.828059	-2.77025	-1.09838	-1.11959	-4.35501	-4.96474		3.85363	2.4169	2.02505	3.03269	1.77948	2.79735	-0.119853	5.09931		0.650239			-0.111224	-1.2464	-2.33826	-0.139234	-1.90446	-2.19078	-2.53231	2.93272	0.374061	-2.51038	-3.21849	-1.66203
nw>contig11425|size91|read20|cov11.03_3708	H-probe	-0.136897	-1.33483	-0.886993	-0.460522	-2.46876	-2.37837	-0.912053	2.80097	0.841718	-1.78077	-6.05808	-2.79195	-3.11187	0.0857008	-0.963311	-0.980777	-1.67523	-0.960272	-1.88899	1.39689	0.153923	-2.31874	-0.943369		4.05144	2.50821	2.28867	2.95206	1.88368	2.01942	0.807918	5.83828		1.33051			0.286844	-1.163	-2.02865	-0.400217	-1.7942	-2.71108	-1.547	4.01446	0.920727	-1.52102	-2.17313	-0.608944
nw>contig11427|size144|read44|cov14.43_7710	H-probe	1.44127	0.784212	0.469018	0	0	2.07094	0	0	-0.738654	0	0	-0.602865	0	1.28727	0.166098	0	0.785761	0	0.99508	0.990922	-0.738654	0	0		2.63995	2.29756	1.08754	2.17559	2.09313	1.33492	1.70235	1.52063		1.68605			0	0.75119	-0.276726	0	0	1.34336	1.94745	1.54351	0.506778	1.04038	0	0.952685
nw>contig1143|size88|read38|cov22.02_2716	H-probe	-1.4693	0.581275	-1.81737	-0.0100556	-4.74594	-2.80044	-0.934821	-2.44822	-0.9245	-5.39264	0.481186	-3.60712	-1.94769	-1.42039	-1.81117	-1.42529	-3.06155	-4.11321	-0.591821	-1.48934	-1.08047	-1.67955	2.5823		2.29413	1.90119	0.59755	1.19218	-1.57741	-3.33167	-0.433159	-0.605581		0.841354			-1.16659	-0.576163	-2.13388	-1.93443	-3.97185	-4.11916	-2.09323	-0.0966901	-1.37285	-1.04512	-0.953428	-1.24196
nw>contig11434|size288|read66|cov10.66_79713	H-probe	0	0.784212	1.04214	0	0	0	0	0	-1.52104	0	0	0	0	0.782686	0	0	0	0	0.99508	0	-1.52104	0	0		2.37476	1.85234	1.13087	0	0	1.33492	0	0.698714		0			1.04316	0	0.626611	0	0	0	0	0	-1.52104	0	0	0
nw>contig1144|size79|read103|cov60.99_0725	H-probe	1.09611	1.07169	-0.396028	0.366588	-0.214655	0.44176	0.827347	1.25773	-1.85296	-0.499335	0.0900669	-1.29726	0.0986771	-0.384697	0.200208	-0.834691	-0.454006	-1.25283	1.01054	0.573217	-1.07462	-1.68496	-3.45116		4.05575	3.19257	2.04752	1.74287	2.81025	1.02384	3.66554	3.156		1.89604			-0.892612	-0.788904	-1.37043	-0.759391	-0.562454	-0.832383	0.159088	2.57596	-1.43771	-1.85085	-2.00665	-1.42425
nw>contig11440|size115|read21|cov8.83_29717	H-probe	0	-0.419911	-1.74616	-0.490884	-0.648905	1.76605	-0.562987	0	-0.860191	-0.897016	0	-1.44257	1.6307	-1.20412	-0.0693425	-1.27948	-1.42768	0	0.432093	0	-0.860191	-0.897016	0		4.14942	2.46817	1.72818	2.8812	2.09005	2.47711	3.05426	2.04099		1.54539			2.06426	-1.20412	-0.684132	-0.503483	-1.42768	0.822693	-0.562987	0.706028	-0.860191	-0.897016	0	-1.44257
nw>contig11441|size76|read13|cov8.43_16718	H-probe	-1.33857	0.984909	-0.948562	0.388489	0	-0.391403	0	-0.999629	1.19655	0	0	-0.422548	-1.33857	-0.304515	0.120874	0.403635	0	-1.77036	0.99508	-0.00870661	0.983315	0	0		-1.33857	1.26017	0.808387	0.86718	1.85335	-1.77036	2.46169	-0.999629		1.68605			-1.33857	0.446675	-0.948562	-0.400107	0	-1.77036	0	-0.0384053	0	0	0	-0.422548
nw>contig11443|size86|read16|cov8.64_26720	H-probe	0.224097	-1.51518	-0.648009	-0.645913	0.237059	0.884843	0.934066	0.516199	-0.823865	-1.80648	-3.81413	-2.79213	0.506962	-0.973653	-0.156292	-1.10966	0.440116	1.25695	1.07256	-0.849257	-0.862222	-0.936077	-3.81413		2.13092	1.43363	1.73166	2.19066	3.38899	3.22314	3.02351	3.12568		1.44844			0.641587	-1.19902	-0.918521	-0.201073	-0.428621	0.428377	0.373012	1.21246	-0.358006	-0.961612	-2.91816	-4.09649
nw>contig11445|size103|read68|cov30.92_35722	H-probe	0.222964	-1.73431	-1.86799	-0.48549	-1.76996	-2.4587	-2.103	1.94712	1.37705	-1.70699	-3.56608	-0.990546	-0.450051	0.692421	-1.37547	-0.68663	-1.78851	0.120908	-2.18406	-0.0678363	-0.777466	-2.83083	-4.00241		3.80297	2.51893	1.50975	3.1864	1.95631	2.55892	0.582094	4.68442		1.13936			-0.276715	-1.2696	-2.86988	-0.0844092	-2.11145	-2.22426	-2.2409	2.51268	0.536498	-1.76003	-3.1125	-0.993323
nw>contig1145|size85|read186|cov105.56_1731	H-probe	-1.98004	0.822441	-1.2188	-0.148208	-5.01287	-2.83288	-0.969299	-2.31215	-0.726363	-7.49691	1.50047	-5.34005	-2.44007	-0.832937	-2.44133	-1.53074	-3.13562	-4.657	-0.257098	-1.21345	-0.72762	-1.47314	3.33569		2.36528	2.45202	0.709699	1.0893	-1.91705	-3.51467	-0.606656	-0.200035		0.885324			-0.898566	-0.109389	-1.93384	-1.85695	-4.20098	-4.30263	-1.89607	0.678412	-0.949521	-1.18946	-2.97742	-1.13546
nw>contig11453|size70|read20|cov13.54_3727	H-probe	-0.700875	-2.06059	-1.69301	-0.52835	-1.30374	-2.01029	-1.52228	1.87485	1.21101	-0.976428	-2.75212	-1.46405	-0.346751	0.402074	-1.13495	-0.387322	-1.34843	0.0346658	-1.71628	-1.20367	-0.400841	-2.16207	-3.64685		3.43863	2.25759	2.1188	3.22138	2.40785	2.1129	0.509417	4.6224		1.01019			-0.0403121	-1.41879	-1.84109	0.0236004	-1.63445	-2.13446	-2.00951	2.31455	0.197159	-1.42538	-2.98176	-0.975219
nw>contig11454|size89|read16|cov9.12_25728	H-probe	0	-0.925326	-0.579908	0	0.778772	0.84832	0	0	-1.07038	0	0	0	0	-0.925326	0.0517139	0	0	0	0.99508	0	-1.07038	0	0		0	1.16673	1.17704	1.93137	0.72539	0	0	1.52063		0			0	0.683267	1.08718	1.64944	0	0	0	0	-0.317251	0	0	0
nw>contig11461|size123|read58|cov23.04_17732	H-probe	-0.289083	-2.22583	-0.689977	-0.128319	-2.37352	-2.43384	-1.29331	1.91144	1.06387	-1.2785	-2.25505	-4.49534	-0.318216	-0.0092798	-0.559612	-0.160842	-2.17057	-0.377751	-1.3371	0.460709	-0.50649	-1.81647	-5.79628		3.50511	2.1194	2.07887	3.33652	1.68914	2.22395	0.819519	5.31225		2.03026			0.337702	-1.25843	-1.26283	0.283958	-2.37552	-2.01621	-2.30242	3.077	1.0008	-1.01875	-2.29417	-2.20878
nw>contig11467|size83|read24|cov12.64_7733	H-probe	0.599066	-0.288178	-0.857141	-1.65135	-1.04302	-1.77036	-0.999801	0	-0.361446	-0.391157	0	0.667558	-2.02077	-1.5776	-0.82985	-0.334482	-1.03603	-0.701223	-0.999801	0	-0.361446	-0.391157	0		1.49855	2.42351	0.897637	0.915417	1.32228	1.05551	0.702551	1.80415		1.72208			-0.378542	-0.334931	-1.89929	0.29332	-1.08755	-0.947668	0.280245	0.724583	-0.361446	-0.391157	0	-1.01498
nw>contig11469|size85|read22|cov12.86_12734	H-probe	-1.36341	0.398302	-1.51035	-0.170535	-4.302	-2.48675	-0.601778	-1.0184	-0.327455	-5.37511	2.2843	-5.19681	-1.66643	-1.30705	-1.21358	-1.78934	-2.98539	-3.72708	-0.481292	-0.617868	-0.546487	-1.8987	2.57838		2.27872	1.9218	0.740558	0.701931	-1.49584	-3.2515	-0.0781826	0.380021		0.730683			-1.16393	-0.441788	-2.09198	-2.3808	-3.7769	-3.89474	-1.34482	1.03809	-0.806244	-1.00825	-0.605834	-0.953328
nw>contig11470|size133|read25|cov9.21_2735	H-probe	0	-0.0322338	-1.10712	-0.745572	-0.104901	2.07094	1.14256	1.3291	-1.46916	0.147111	-2.19011	-0.748964	0	-1.32166	-0.0434979	-0.217301	-0.0979114	1.06914	-0.295598	0.990922	-0.485847	-0.897016	-2.19011		2.37476	2.55677	1.75402	1.5933	2.86195	1.33492	2.16609	2.04099		1.54539			0	-0.570467	-1.72032	-1.53417	0.696754	0.822693	1.65186	0.961223	-0.223729	0.143366	-0.745603	0.806586
nw>contig11472|size1414|read834|cov22.11_985123	H-probe	0	-0.304515	0	-0.400107	-0.883673	0	0	-0.91049	1.19655	0	0	0	0	0.478172	0	-0.400107	-0.883673	0	0	-0.91049	0.983315	0	0		1.62912	0.420321	0	0.368431	0.322154	0	0	0.610144		0			0	-0.304515	0	-0.400107	-0.883673	0	0	-0.204462	0.753132	0	0	0
nw>contig11473|size86|read17|cov9.01_4736	H-probe	0	0	0	0	0	0	0	0	-0.468746	0	0	0	0	0	0	0	0.785761	0	0	0	-0.468746	0	0		2.37476	0.724835	1.47761	0	0	0	0	0		0			1.04316	0	0	0	0.734246	0.822693	1.28005	0.724583	-0.468746	0	0	0
nw>contig11476|size119|read28|cov10.92_18737	H-probe	1.44127	0.47401	-1.23289	-0.0946405	-2.38552	1.76605	1.82204	0	0.634211	-1.12012	0	-1.2496	2.8659	0.098414	-0.0338671	-0.744783	-1.09392	0	1.67077	1.57285	-0.562343	-1.12012	0		2.63995	1.72324	-0.0792601	0.944725	0.0930431	1.33492	3.00256	2.42261		0.993113			2.06426	0.419734	-1.54321	0.337313	-1.16702	1.34336	-0.321848	0.976786	1.34139	0.518435	0	-1.2496
nw>contig1148|size78|read159|cov83.00_18741	H-probe	0.179151	-2.01014	-1.61831	-0.750057	-1.60964	-2.45546	-2.77485	2.10968	0.774389	-2.21741	-3.66928	-1.50988	-0.232738	0.538598	-1.86081	-0.896293	-1.68772	0.300406	-2.79394	-0.532186	-0.887023	-3.21377	-4.09761		3.74972	2.40829	1.65724	3.29668	2.01623	2.60711	-0.125696	5.16291		0.54968			-0.0122311	-1.36817	-2.75289	0.0116683	-1.96121	-2.14376	-2.98242	2.90496	0.51684	-2.13281	-3.22402	-1.60993
nw>contig11480|size97|read64|cov31.62_8739	H-probe	-0.0513739	-1.87117	-1.09502	-0.711182	-1.88859	-1.67179	-2.17338	1.47572	1.7566	-1.69172	-3.64869	-1.48398	-1.17217	0.330351	-1.59996	-0.532021	-1.60459	-0.75254	-1.59894	-0.298533	-0.634912	-4.57391	-3.57921		3.72595	2.29308	2.24153	2.98943	1.88545	1.9677	1.01717	4.10737		1.32744			-1.48454	-1.4486	-1.47505	-0.000889125	-2.26021	-2.33645	-1.86774	1.96822	0.0805158	-0.915757	-2.35464	-1.20936
nw>contig11482|size150|read29|cov9.49_52740	H-probe	-1.0408	-1.07195	-1.24193	-0.39944	-0.648905	1.37896	-0.807184	0.81248	-0.562343	-0.632981	0	0	-0.851374	-0.289262	-0.610305	-1.18804	0.237718	0	0.187896	0	-0.562343	-0.632981	0		-0.852952	0.78039	-0.56841	-0.419497	-0.22185	0	-0.807184	0		2.07727			-0.839847	0.170722	-0.615316	0.461405	-0.209172	1.34336	-0.807184	0.742903	-0.562343	0.407402	0	0
nw>contig11483|size189|read176|cov33.35_28125	H-probe	0	-0.728149	0	-0.287217	0	0	0	0.81248	-0.253327	-0.736268	0	0	0	-0.728149	0.631622	-1.07581	0	0	0.99508	0	-0.253327	-0.736268	3.61071		2.37476	0.836539	1.75695	0.191475	2.78243	0	0	0.698714		-0.736268			1.04316	-0.728149	0.626611	-1.07581	1.21851	2.02674	1.28005	0.976786	0.499805	0.304114	0	0
nw>contig11490|size92|read75|cov38.30_11742	H-probe	2.1477	-1.3528	-0.281253	-2.40172	-0.883673	0	-0.763824	0.81248	-1.46916	-1.70755	-4.33064	-0.422548	0	-0.44007	-0.51728	-1.87345	-0.0979114	2.43101	0.231256	0	-1.46916	-1.70755	-4.33064		3.51932	2.01028	1.29964	0.85215	3.52597	4.37809	2.56059	2.97336		1.22852			0	-1.39955	-1.29553	-1.54087	0.334833	0	0.516221	2.06269	-1.46916	-1.70755	-2.48965	-0.422548
nw>contig11491|size71|read15|cov10.56_4743	H-probe	-1.28888	0.680543	-1.67159	-0.110075	-4.63432	-2.63339	-1.0264	-3.38368	-1.07369	-5.22665	1.02548	-5.02113	-1.75958	-1.35027	-1.87834	-1.52981	-2.93376	-4.00584	-0.539275	-1.7571	-1.11476	-1.78221	2.76056		2.4151	2.00872	0.799832	1.13058	-1.60935	-2.96745	-0.507524	-0.902413		0.645615			-1.02296	-0.452939	-1.93409	-2.02855	-4.19426	-3.91084	-2.17101	-0.309794	-1.50186	-1.29382	-1.75552	-1.35251
nw>contig11493|size1426|read848|cov22.56_550126	H-probe	0	-0.275907	-0.521246	0	0	0.84832	1.11631	0	-0.698952	0	0	-0.602865	0	-0.275907	0.54819	0	0	0	-0.321848	0	-0.698952	0	0		0	0.929126	0.152271	0	0	0	-0.321848	1.16743		1.07647			0	0.966764	-0.521246	0	0	0.822693	-0.321848	0.395779	-0.698952	0	0	-0.602865
nw>contig11496|size104|read17|cov8.09_8745	H-probe	0	-1.36991	-1.71453	-1.17737	0.521924	-1.16275	0.297658	-0.992236	-2.08613	-2.41027	1.43275	-2.87842	1.03444	-1.07623	-0.185301	-1.6071	0.990246	-0.439206	-1.1405	-2.32133	-2.08613	-1.20399	-2.10848		3.51932	0.56369	1.28499	1.11773	3.36867	1.00157	2.18391	1.49467		0.299978			3.0747	-2.28159	-1.36062	-1.41115	-0.209172	-2.54171	0.80695	-0.244131	0.610662	-2.41027	-2.10848	-2.87842
nw>contig11498|size80|read32|cov20.05_2746	H-probe	0.300846	-1.93484	-2.13242	-0.6865	-1.64273	-2.41514	-3.15954	2.21597	0.603203	-2.10446	-3.71334	-1.33666	-0.453148	0.622636	-2.10377	-0.981604	-1.76781	0.316574	-2.78151	-0.629374	-1.16384	-3.10701	-4.27874		3.5986	2.47607	1.19496	3.18987	1.9602	2.5832	-0.404663	5.24613		0.771738			-0.297622	-1.36902	-3.2937	-0.0521281	-2.04709	-2.14372	-3.0075	2.97945	0.541263	-1.88619	-3.38991	-1.63753
nw>contig11505|size117|read74|cov21.94_24128	H-probe	0	0	0	0	0.778772	0.84832	0	0	-0.361446	-0.30955	0	1.68254	1.6307	0	0	0.803741	0	0	0	0	-0.361446	-0.30955	0		2.63995	1.85234	0.673517	0	0.72539	1.33492	0	0		-0.30955			0	0	1.06203	0	0	0	0	0.395779	-0.361446	-0.30955	0	0
nw>contig11507|size93|read19|cov10.31_8748	H-probe	-0.189676	-2.00891	-1.05909	-0.896683	-1.86917	-2.27221	-2.16834	1.9325	1.19808	-1.74516	-3.2281	-2.36682	-0.0381194	0.127446	-1.271	-0.672131	-1.99488	-0.192206	-2.15192	0.00176787	-0.586025	-2.64993	-3.94704		3.2783	2.13537	2.04803	3.0176	1.88212	2.14759	0.525234	4.88568		0.977754			-0.577104	-1.39068	-2.42602	-0.107462	-1.93568	-3.13156	-2.35292	2.65797	0.476349	-1.55499	-2.39561	-1.64661
nw>contig11508|size81|read32|cov18.22_19749	H-probe	-0.12647	-2.05152	-1.26321	-0.970085	-1.65002	-2.34589	-2.88779	1.91769	0.853016	-2.14766	-3.06683	-1.63171	-0.17612	0.461708	-1.47224	-0.628658	-1.69386	0.515023	-2.78687	-1.36478	-0.961764	-3.87082	-4.33629		3.57544	2.38538	1.92629	3.11645	1.87225	2.65274	-0.028645	4.84784		0.651285			-0.345818	-1.33987	-2.28647	-0.0597405	-1.86103	-2.42134	-2.47447	2.66739	0.393733	-2.6408	-3.15713	-1.72981
nw>contig11510|size94|read53|cov26.13_29751	H-probe	1.44127	-1.39859	-0.902491	-1.18578	-1.35225	-2.54171	-2.32161	-0.999629	-1.53617	-1.62239	-2.97742	0.667558	0	-0.522428	-0.539777	-1.97437	-1.34526	-1.47257	-1.32653	-0.999629	-1.53617	-1.62239	-2.97742		3.76123	2.08592	1.80962	1.93932	1.38671	0.799657	1.0028	2.28174		-1.62239			0	-0.574214	-0.0494609	-0.324933	-1.39677	-2.54171	-1.04156	0.818087	-0.290735	-1.62239	-1.53291	-1.01498
nw>contig11512|size438|read153|cov16.89_119752	H-probe	0	0.784212	-0.579908	0.788596	0	0	0	0	0	-0.391157	0	-0.422548	0	0.782686	-0.579908	0	0	0	0	0	0	-0.391157	0		3.38123	2.09206	0.550965	0.768538	1.85335	1.33492	0	0		1.29489			1.04316	0	-0.579908	0	0.734246	0	0	0.395779	0.753132	-0.391157	0	-0.422548
nw>contig11513|size161|read56|cov16.90_35753	H-probe	0	1.86339	-1.694	0.309208	-2.60179	-0.391403	-0.321848	-0.999629	1.19655	-0.698565	0	-0.602865	0	-0.734751	-1.06238	0.324354	-1.81603	-1.77036	1.25655	-0.999629	0	-0.698565	0		3.05769	1.90256	1.33093	1.15782	-0.123225	-1.77036	1.3805	-0.999629		0.377905			1.04316	0.0164392	-1.06739	-0.479388	-2.60179	-1.77036	-0.321848	-0.999629	0	0.939994	0	-0.602865
nw>contig11515|size98|read20|cov10.08_27755	H-probe	1.20811	-1.28267	-0.893222	-1.41619	-0.197428	-0.195124	1.0475	1.38013	-2.66946	-1.98697	-3.35775	-2.76938	0.0348309	0.544639	0.400119	-0.637667	-0.393895	-0.123975	0.131305	-0.0116215	-0.694559	-2.52495	-3.35775		3.97554	2.90745	2.55217	2.68016	3.76747	2.24522	3.14971	3.65433		1.05198			0.0495048	-0.953357	-0.968184	-0.696179	-0.732271	-1.21817	0.579993	1.0276	0.304058	-1.72722	0.0303557	-2.76938
nw>contig11517|size84|read22|cov13.02_1756	H-probe	-2.83107	-0.908711	-1.33255	-1.27305	-0.145926	2.07094	0.897353	-0.999629	-1.72211	-1.44595	0	-1.35399	-1.20037	0.213831	-1.02808	-0.744783	-0.641916	0	-0.540809	-0.999629	0.252794	-1.44595	0		0.930163	2.07059	1.28369	1.71063	1.7164	2.82587	2.41579	1.24475		0.240098			-1.78791	-0.955464	-1.03781	-0.116981	0.152749	1.72514	1.40665	0.826704	-0.110298	0.192609	0	-1.35399
nw>contig11519|size72|read15|cov10.28_2758	H-probe	-0.386377	-1.96034	-1.0691	-0.395309	-1.57913	-2.20338	-2.33679	1.56714	1.66097	-2.14323	-2.69957	-1.33995	0.054744	0.312796	-1.18723	-0.731454	-1.59873	0.0832783	-2.32243	-1.30767	-0.242534	-3.63388	-2.84407		3.32357	2.34368	2.10598	3.50076	1.99476	2.23328	0.551551	4.50457		0.931247			-0.266087	-1.58964	-2.12468	0.528715	-1.71091	-2.34139	-2.16949	2.33571	0.741392	-1.61291	-2.84724	-1.31732
nw>contig1152|size160|read288|cov85.91_75768	H-probe	-1.47381	0.917105	-1.79658	-0.294944	-4.71607	-3.02673	-1.11907	-2.71292	-0.77318	-6.52399	1.59545	-5.25504	-2.22636	-0.764445	-2.34239	-1.60605	-3.19579	-4.24876	-0.488915	-1.2337	-0.8973	-1.82333	2.98279		2.29946	2.43102	0.416096	1.06779	-1.92827	-3.57143	-0.839096	-0.588295		0.748294			-1.08621	-0.237795	-2.22048	-2.22223	-4.45326	-4.31422	-2.40901	0.194198	-1.04422	-1.09045	-2.02035	-1.34658
nw>contig11520|size95|read58|cov28.62_18759	H-probe	-0.127036	-2.05671	-1.26036	-1.06195	-1.65136	-2.51004	-2.85218	2.17959	0.576177	-2.26989	-3.11961	-1.36705	-0.283301	0.393406	-1.58018	-0.749164	-1.70075	0.497224	-2.76997	-1.14102	-1.1091	-4.01508	-4.62319		3.59615	2.38185	1.94099	3.07632	1.80047	2.55134	-0.103389	4.98927		0.771697			-0.339176	-1.30756	-2.39151	-0.193839	-1.92869	-2.47307	-2.59597	2.85924	0.430826	-2.50991	-3.21117	-1.76918
nw>contig11521|size98|read25|cov12.66_14760	H-probe	0.385567	-2.22502	-1.31944	-1.15299	-1.9429	-2.66902	-3.49169	1.15076	0.128753	-1.93597	-3.21881	-2.27952	-0.735225	0.226293	-1.59532	-1.45405	-1.9272	-0.618298	-1.83738	-0.299969	-0.559042	-2.14774	-3.14932		3.66751	1.99268	2.20348	2.84663	1.81838	1.43665	0.367137	4.44562		0.949714			-0.037163	-2.09676	-1.84473	-0.196024	-1.81858	-3.36537	-1.57267	2.51232	0.756212	-2.3631	-2.64265	-1.05822
nw>contig11522|size73|read35|cov23.04_7761	H-probe	-0.32896	-2.10579	-1.9729	-0.41859	-1.59905	-2.29309	-1.99219	1.95726	1.11447	-1.44226	-3.43569	-0.753245	-0.315404	0.294817	-1.71489	-0.865091	-1.79006	-0.105117	-2.2346	-0.440438	-0.672032	-2.91121	-3.81556		3.34553	2.2067	1.46392	3.19004	2.02546	2.23339	0.571076	4.97616		1.19826			-0.317494	-1.48755	-2.68016	0.163084	-1.94604	-2.13707	-1.88625	2.66435	0.48058	-1.66827	-3.05009	-1.65544
nw>contig11524|size105|read44|cov19.77_25763	H-probe	-2.44245	1.37875	-1.61671	-0.316057	-5.06971	-3.60238	-0.607681	-1.60391	-1.94222	-2.81277	0	-2.90664	-2.84928	-0.514962	-2.41446	-0.287973	-3.64059	-4.08511	0.31934	-0.363204	-0.843633	-2.81277	0		1.85319	2.25284	0.608971	1.24305	-2.25073	-4.18316	0.672189	-2.23429		0.490416			-1.22752	0.042418	-3.4839	-1.2514	-3.532	-4.33527	-2.29831	0.0103676	-1.23504	-1.77239	0	-1.35109
nw>contig11525|size102|read21|cov10.43_40764	H-probe	-1.48177	0.353658	-1.48868	-0.0333832	-4.58636	-3.0095	-1.04592	-3.62809	-1.63845	-6.72723	0.826518	-4.00115	-2.49583	-1.65771	-1.62631	-1.03225	-3.2998	-3.84516	-0.659087	-2.10423	-1.81841	-1.63605	2.74398		2.16177	1.64269	0.805654	1.32548	-1.88157	-3.2183	-0.628609	-1.24838		0.984699			-1.30243	-0.805866	-1.94239	-2.34608	-4.22701	-4.19037	-2.73363	-0.535286	-2.17296	-1.04861	-1.80744	-0.411492
nw>contig11526|size160|read31|cov8.70_84765	H-probe	2.1477	-0.893917	-1.24193	0.0114329	0	0	1.43816	0	0	-0.30955	0	0	1.6307	-0.893917	-0.610305	-0.777163	0	0	0	0	1.56267	0.896727	0		3.76123	1.40365	0.748949	-0.00862473	2.29868	1.33492	0	0		0.76692			0	-0.142727	-0.179896	-0.00116552	0.734246	0	1.28005	0.976786	0.753132	-0.30955	0	0
nw>contig11527|size71|read18|cov12.89_0766	H-probe	0.159553	-1.80774	-0.930722	-1.21239	-1.6207	-2.62499	-2.97305	2.25943	0.196825	-3.15796	-3.42975	-1.89569	0.391695	0.455009	-1.97465	-0.985334	-1.68639	0.408954	-2.6134	-1.19933	-0.560591	-4.3804	-5.57948		3.96429	2.44745	2.2995	2.97688	1.88216	2.56606	-0.120004	5.05334		0.372587			0.201275	-1.21995	-2.10062	-0.194938	-1.69477	-2.40772	-2.3126	2.94715	0.0732001	-3.16438	-3.15536	-1.82416
nw>contig11528|size561|read172|cov14.40_497767	H-probe	0	-0.146874	-0.521246	-0.713002	0	-1.77036	0	0	-0.738654	1.04413	0	-0.602865	0	-0.1484	-0.521246	-0.713002	0.785761	-1.77036	0	0	-0.738654	0	0		0	-0.931086	0.152271	-0.713002	1.20583	-0.435445	0	1.16743		1.07647			0	-0.931086	-0.521246	-0.713002	0	-1.77036	1.28005	0	-0.738654	1.04038	0	-0.602865
nw>contig11531|size126|read89|cov25.71_44129	H-probe	0	0.784212	0	0	0	0	0	0	0	-0.391157	0	-0.894544	0	0	0	0	0.785761	0	0	0	0	-0.391157	0		0	0	0	0	2.09313	0	0	0		-0.391157			1.04316	0.75119	0	0	0	0	1.28005	0	0	-0.391157	0	-0.894544
nw>contig11531|size74|read20|cov13.04_0769	H-probe	-0.964169	-0.287609	0.14122	-0.32235	-1.10377	0.300581	-0.377198	-0.187148	0.675244	-1.04418	0	-1.05218	-2.07743	-0.473786	0.0580605	-1.48562	-0.720127	-1.77036	0.761393	-0.999629	-0.627065	0.550844	0		1.906	2.00758	2.11885	2.3499	1.04746	1.57101	1.14124	1.97373		0.0249277			-1.46964	-0.535512	0.0462769	-0.344691	-1.16702	-1.77036	-1.81536	0.818087	0.29335	-1.04793	0	-1.17917
nw>contig11532|size89|read27|cov12.84_13770	H-probe	-0.798566	-0.429626	-0.477516	0.0180746	-2.57456	-0.0721089	-0.147665	-0.771987	-0.832524	-2.54066	-3.51591	-3.12892	-1.45949	-0.701157	0.0980501	0.249878	-0.0287869	-1.04135	0.0507327	-1.58447	0.75744	-1.03939	-3.51591		3.73569	3.02944	2.65924	3.37897	2.96815	1.95905	2.50677	4.23449		1.60595			-1.44397	-0.725696	-0.98525	-0.00997451	-0.961626	-1.48649	-0.893468	2.32391	0.543216	-1.53251	-2.0714	-3.12892
nw>contig11536|size78|read16|cov9.79_18772	H-probe	-1.33857	1.64132	-2.79812	-2.26076	-3.86007	-0.470767	0.268458	0	0.126171	-1.27081	-1.12948	-1.7579	-0.304129	-1.92334	-2.79812	-2.26076	-3.07431	-2.54171	0.408695	0.990922	-1.07038	-1.27081	-1.12948		0.711018	0.168721	-1.32051	-0.993468	-1.56139	-2.54171	-1.1697	0		1.17159			-0.295407	-0.0231089	-2.17151	-2.26076	-3.12583	-2.54171	-1.1697	0.395779	-0.317251	-0.230431	-1.12948	-1.7579
nw>contig11541|size190|read174|cov34.78_130130	H-probe	0	-1.93253	-0.521246	0	-0.883673	0	1.60977	0	-0.253327	-0.736268	0	-1.2496	0	-0.272153	-0.521246	0	0.781723	0	-0.534116	0	-0.253327	-0.736268	0		2.04958	-0.367843	0.609628	3.00637	1.20946	1.33492	1.16824	1.16743		0.949779			0	-1.18134	0.540785	0	-0.149427	0	-0.534116	0.706028	-0.253327	-0.736268	0	-1.2496
nw>contig11541|size79|read25|cov15.41_11774	H-probe	-1.69761	1.15919	-1.19578	0.291532	-4.30069	-2.87831	-1.24304	-2.54402	0.275398	-6.11117	1.70163	-3.95581	-1.54995	-0.625559	-1.07017	-1.19738	-2.89303	-3.75044	-0.760265	-1.05097	-0.451267	-1.61937	2.88039		2.37646	2.6878	1.17181	1.59419	-1.57517	-2.85941	-0.47278	-0.340234		0.755924			-1.08543	0.0728162	-1.66596	-1.52234	-4.28443	-4.18817	-2.171	0.235532	-0.505149	-0.989266	-1.33797	-0.379536
nw>contig11548|size110|read27|cov12.39_9775	H-probe	-1.3898	1.73986	-2.5268	0.115023	-5.12113	-1.45405	0.237287	-1.99944	-4.00046	-3.16512	0	-1.43374	-2.83107	-0.895077	-3.14	-1.85199	-2.35729	-5.47265	1.40646	-1.99944	-1.70532	-3.16512	0		1.75544	1.80088	-1.14912	0.0793827	-1.30689	-4.13774	-1.9066	-1.99944		-0.0338439			-0.766801	0.238378	-2.51339	-1.07599	-4.38688	-4.1293	-0.626553	-0.173111	-3.24733	-1.52656	0	1.33569
nw>contig1155|size135|read224|cov80.56_13782	H-probe	-0.72698	1.6368	-0.93339	-0.487287	-4.52179	-1.47985	0.761901	-2.52552	-1.24218	-2.90343	3.54123	-2.81006	-3.34681	0.265634	-0.890695	-0.917021	-1.24559	-1.952	1.48257	-1.5346	0.0564498	-1.69715	0		2.10971	2.71265	1.41027	-0.0365071	-0.352902	-1.10714	1.65178	-0.721376		0.0326355			-1.28255	-0.0778227	-1.92612	-2.91069	-2.2053	-2.16184	0.193241	0.46441	-1.17995	-0.517422	0	-1.25451
nw>contig11552|size150|read50|cov16.52_88776	H-probe	0.809129	-0.319309	-1.40968	0.738219	-0.104901	1.76605	-1.43174	0	-1.74271	-1.94852	0	-2.35987	0.292132	-1.07385	-2.45182	-0.368319	-0.0979114	1.67643	-0.436655	0	-0.180042	-1.94852	0		3.36846	2.12706	1.82941	2.99424	3.05871	3.72037	2.63695	2.97336		-0.872054			0.30366	-1.98304	-1.38979	-0.035745	0.334833	0	0.515719	2.26572	-0.989582	-0.309965	0	-0.804324
nw>contig11554|size238|read52|cov10.59_12777	H-probe	2.1477	-1.09364	0.423793	-0.777163	0.778772	0	0	0	0	-0.391157	0	0	0	-0.310953	0.120874	-0.777163	0	0	0.99508	0	0	0.81512	0		2.37476	0.47105	1.57742	0.490124	2.09313	1.33492	1.70235	0		-0.391157			1.64223	-1.09364	-0.948562	-0.777163	0	0	0	0.418751	0	1.2474	0	0
nw>contig11556|size104|read17|cov8.00_16778	H-probe	0.870393	-2.05922	-1.69123	0.0548122	-1.03466	-2.57673	-1.12138	1.06942	0.883177	-1.34409	-1.27906	-0.35317	-2.83107	0.113857	-0.860283	0.435673	-1.29264	-1.22388	-1.81542	-1.58447	0.112046	-1.78132	-4.82029		3.36304	2.2726	1.79638	3.36488	2.23298	2.00945	0.307205	4.02952		1.61447			-0.440689	-1.38414	-1.65798	0.24485	-1.4059	-1.35758	-2.21232	1.87449	0.960485	0.0823461	-2.66862	-1.65753
nw>contig11558|size72|read24|cov16.82_0780	H-probe	0.0566172	-1.7166	-0.853221	-1.13347	-0.159376	1.03477	-0.133295	1.03362	0.218648	-1.3113	-3.7477	-2.66479	0.102928	-0.472863	-0.601696	-1.22339	0.516982	1.88927	0.319439	0.176175	-0.240251	-2.13705	-3.67822		3.13418	2.33987	2.27389	2.1231	3.97725	4.39066	2.48907	4.14467		0.836315			-0.822685	-1.35825	-1.79074	-0.455952	0.0794831	0.979195	-0.0947659	2.31196	0.186919	-0.760313	-2.63909	-2.81648
nw>contig11559|size81|read36|cov19.23_1781	H-probe	0.313213	-2.46148	-0.927211	-0.455147	-1.53065	-2.10978	-2.68624	1.76275	0.863253	-1.49773	-3.00956	-0.48436	0.244564	0.247292	-1.22556	-0.607472	-1.58258	0.154986	-2.14456	-0.449073	-0.186094	-3.95631	-7.48745		3.79885	2.16745	2.22295	2.99109	2.04693	2.56752	0.474452	4.93865		0.961528			0.160549	-0.97696	-2.31209	0.0266311	-2.19633	-1.80706	-2.20192	2.7649	0.460872	-2.09265	-2.94012	-0.664777
nw>contig11573|size133|read78|cov25.58_33784	H-probe	2.1477	-1.08234	0.138807	-1.18804	1.65398	1.76605	-0.260777	0	0	-0.897016	0	-1.02677	0	-0.299652	0.773483	-0.384294	0	0	0.734303	0	0.983315	-0.897016	0		2.37476	-0.357503	1.46535	1.19636	1.20583	1.33492	-0.260777	1.16743		0.789031			2.39038	0.81789	0.991837	0.461405	0.734246	1.34336	-0.260777	0.395779	0	-0.897016	0	-1.02677
nw>contig11578|size84|read14|cov8.49_4785	H-probe	-1.13254	1.48943	-0.814124	0.573845	-3.73606	-2.84004	-1.69238	-2.71298	-0.889288	-3.90774	2.41174	-3.23701	-2.45736	-0.173188	-0.708472	-0.608034	-3.18664	-3.79266	-0.0769713	-0.955658	-0.719732	-2.70146	3.42094		1.78564	2.18708	1.61931	1.62283	-1.29793	-2.94461	-0.177151	-0.244087		0.8204			-0.947495	0.126698	-0.778591	-1.10631	-3.94439	-3.82016	-2.36385	0.850314	-0.95081	-0.666785	-1.12948	-0.46758
nw>contig11580|size123|read26|cov9.50_60786	H-probe	0	-0.893917	0.613195	0.388489	0	0	0	-0.999629	-0.650237	1.04413	0	-1.02677	2.37664	-0.11123	0	-0.400107	0	1.06914	0	-0.999629	-0.650237	0	0		1.62912	0.958421	1.47761	0.86718	1.85335	0	0	-0.300915		1.68605			1.64223	-0.893917	0.626611	0.877727	0	0	1.28005	-0.0384053	-0.650237	0	0	-1.02677
nw>contig11581|size298|read95|cov15.27_157787	H-probe	0	-0.103793	0.0332866	-0.287217	1.28175	0	1.43816	0.81248	-0.361446	-0.983536	-2.10848	0	1.03444	-0.105319	0.489527	-1.07581	0	0	0	0	-0.361446	-0.983536	-2.10848		3.05769	1.20405	2.21701	0.561393	1.56562	1.33492	0	1.52063		0.0929336			1.64223	-0.888006	-0.579908	-1.07581	0	0	0	0.395779	-0.361446	-0.983536	-2.10848	1.55555
nw>contig11590|size102|read29|cov13.89_15789	H-probe	-0.334377	-0.880048	-0.286439	-3.2504	2.58729	1.76605	-0.561539	2.00896	-2.00471	-1.8179	-2.45579	0.529248	-0.105433	0.163103	-0.246264	-1.90923	2.60122	3.8256	-0.0070872	1.57285	0.290426	-2.86203	-5.99701		2.79138	2.50576	3.06517	1.23989	5.85403	5.28781	1.61754	4.58815		1.36617			-2.48207	-1.74051	-1.28717	-2.60132	2.31648	0.822693	-0.719656	2.45483	-0.100983	-2.86203	-3.58986	-1.90901
nw>contig11599|size82|read20|cov12.34_11792	H-probe	-1.7944	1.00987	-1.06729	0.354396	-4.39281	-3.06291	-1.40397	-3.15776	-0.396102	-6.17078	1.42498	-4.44472	-1.73044	-0.857269	-1.30813	-1.03349	-2.90824	-3.61692	-0.819008	-1.24675	-0.908531	-1.62628	2.74768		2.43339	2.35474	1.18806	1.5752	-1.63575	-3.05582	-0.700554	-0.774822		0.802009			-1.01531	-0.189007	-1.59847	-1.57804	-4.31232	-4.22148	-2.38226	-0.0693031	-1.17234	-0.98045	-1.35602	-0.574829
nw>contig11600|size87|read81|cov34.68_5132	H-probe	0	0.601294	-0.199783	0.0755939	-1.82179	0	0	0	0.634211	-0.698565	0	-0.422548	0	-0.575273	-0.610305	-0.713002	-1.03603	0	0	0	-0.562343	-0.698565	0		2.37476	0.494379	-0.56841	1.21837	0.476891	2.82587	0	0		0.377905			1.04316	-0.606769	0.154124	-0.713002	-1.82179	0.822693	0	0.395779	0.683089	-0.698565	0	-0.422548
nw>contig11607|size190|read50|cov11.76_79794	H-probe	0	0.207085	-0.270674	0.816209	-0.883673	0	0.853332	0	0.540416	-0.391157	0	0	1.03444	0.874211	-0.681196	0.324354	0.407933	0	-0.58483	0	0.327177	-0.391157	0		2.04958	0.48235	1.60261	0.289151	1.41501	1.33492	1.11752	1.16743		-0.391157			1.04316	0.160332	-0.686207	-0.479388	-0.883673	0	-0.58483	0.976786	-0.656138	-0.391157	0	0
nw>contig11608|size1905|read1043|cov20.66_1120133	H-probe	0	1.28942	-0.521246	0	0	0.84832	0	0	-0.253327	-0.951837	0	0	1.03444	0	-0.521246	0	0	0	0	0	-0.253327	-0.951837	0		1.03325	2.09206	0.956364	1.26729	0.72539	0	0	0		0.124633			2.06426	0	-0.521246	0	0	0	1.28005	0	-0.253327	-0.951837	0	0
nw>contig11609|size78|read19|cov12.23_18795	H-probe	0.490921	-2.27811	-1.86897	-0.69996	-1.57616	-2.15077	-2.93745	2.22633	0.888329	-2.20993	-3.71165	-1.63319	-0.0243571	0.345443	-1.9535	-0.915587	-1.70391	0.286285	-2.84547	-0.623006	-0.893065	-3.29086	-4.11089		3.95175	2.25538	1.31804	3.15694	2.05838	2.59044	-0.339408	5.27292		0.574002			0.202822	-1.47011	-3.06782	-0.0656657	-1.88422	-1.85884	-2.98332	2.97793	0.637702	-2.08087	-3.36882	-1.84854
nw>contig11612|size272|read183|cov23.66_88134	H-probe	0	0	0	0	0	0	0	0	0	0	0	0	0	0	0	0	0	0	0	0	0	0	0		0	0.724835	0	0	0	0	0	0.698714		0			0	0	0	0	0	0	0	0	0	0	0	0
nw>contig11613|size77|read32|cov20.84_1796	H-probe	1.44127	-1.56799	-0.766021	-1.5226	-1.45129	-1.77036	-3.27736	0.81248	2.16044	0.65297	-2.68637	-2.25592	1.6307	0.805434	-1.56378	-0.616597	-3.10528	0.660652	-1.69896	0	1.55648	-0.391157	-2.68637		4.31028	1.86683	1.24296	2.10853	1.21283	2.37928	-0.815666	3.45535		1.29489			1.64223	-1.60101	-1.23716	0.0877688	-1.88677	-1.77036	-3.27736	1.82633	0.873153	-0.391157	-0.845383	-2.25592
nw>contig11614|size204|read46|cov10.71_142797	H-probe	1.44127	0.851328	-0.503709	0.518434	0	-0.391403	2.14389	0	0	-1.07144	-1.12948	-1.13705	1.6307	0.306702	-0.471206	0.539704	0.785761	-1.77036	0.99508	0	0	-1.07144	-1.12948		2.63995	0.943888	1.34572	2.09702	1.56562	0.706752	0	0.698714		0.614606			1.04316	0.254916	-0.814034	1.41246	1.21851	-0.427005	0	0.395779	0.753132	-0.0310586	-1.12948	-1.13705
nw>contig11615|size109|read26|cov11.17_16798	H-probe	-0.398676	-1.70185	-0.600218	-0.785843	-0.612674	1.60293	0.744882	1.86553	-2.14717	-1.2601	-2.94176	-0.769862	-0.710379	-0.356954	-0.491478	-0.946108	-0.301208	2.21908	0.20506	0.750313	-0.219078	-2.23436	-2.87227		3.87682	2.53035	2.72152	2.75086	3.85443	5.11687	2.72067	4.86342		1.24679			-0.0403121	-1.85046	-1.77638	-0.429107	-0.177077	1.50016	0.709129	3.04522	-0.168694	-0.903085	-1.60484	-4.36078
nw>contig11618|size101|read21|cov10.17_9799	H-probe	-0.262345	-0.985006	-0.673676	-0.150079	-0.955206	-0.22489	0.955072	1.81279	-1.40387	-1.44221	-2.07872	-3.05706	-0.638524	-0.851652	-0.0523525	-0.766168	-0.127851	-1.10979	0.285512	0.866475	-0.123715	-1.09901	-1.44191		2.98191	2.33912	1.92991	2.46017	2.80056	2.14949	3.08914	4.50531		1.63571			-0.70283	-0.956255	-1.4782	0.152906	-0.523344	-0.769168	0.475617	2.7304	-0.308061	-1.15921	-1.15332	-2.30991
nw>contig11621|size95|read57|cov29.35_1801	H-probe	1.23895	-2.1499	-1.19038	-0.192853	-1.3751	-2.65414	-1.97757	2.02323	1.21314	-1.40661	-2.9706	-1.71238	0.0305844	0.0438313	-0.902838	-0.63838	-1.85778	-0.652697	-1.47022	-0.186648	0.0884562	-2.35476	-2.90111		5.0557	2.22162	2.27742	2.86433	1.91486	1.51095	0.584202	4.65166		0.951221			1.75837	-1.09158	-1.79662	-0.489673	-1.58737	-2.33645	-1.67193	2.39125	1.0416	-1.41312	-2.71348	-0.598259
nw>contig11622|size89|read32|cov16.72_0802	H-probe	0.130591	-2.15714	-1.81089	-0.617164	-1.72344	-2.47067	-2.40495	2.15601	1.08321	-1.78252	-3.71244	-1.17217	-0.419545	0.386667	-1.8207	-0.822166	-1.8223	-0.111932	-2.54204	-0.279381	-0.675867	-2.91498	-4.20668		3.61843	2.27388	1.43647	3.17324	2.00559	2.30355	0.153803	5.24286		0.856965			-0.0851819	-1.5362	-2.90248	-0.0438628	-1.97251	-2.31098	-2.63777	2.93468	0.595413	-1.89988	-3.29819	-1.3872
nw>contig1163|size110|read48|cov22.00_21811	H-probe	-1.36609	0.731491	-1.3126	0.105604	-4.72712	-3.03331	-0.843542	-3.39809	-1.63886	-6.43859	1.96125	-3.56981	-2.50829	-1.27783	-1.36411	-1.00365	-3.05636	-3.94949	-0.573004	-1.65566	-1.72876	-1.32082	2.82921		2.28099	1.85915	0.998132	1.30456	-1.82646	-3.25508	-0.477014	-1.1959		0.800292			-1.31304	-0.619755	-1.92175	-1.69858	-4.15565	-4.1998	-2.1253	-0.264189	-1.83048	-1.17527	-1.33223	-0.392396
nw>contig11630|size70|read16|cov10.81_0803	H-probe	-1.38476	0.985758	-1.56733	0.350243	-4.82729	-2.85284	-0.982322	-3.25183	-0.592077	-5.67226	1.84543	-2.85931	-2.26233	-0.969341	-1.66181	-0.697162	-3.00671	-4.12744	-0.631194	-1.4474	-0.55279	-1.37639	2.42007		2.34178	2.37025	0.88423	1.57818	-1.66478	-3.37845	-0.446426	-1.19463		1.01438			-1.30956	-0.259856	-2.06464	-1.37843	-4.1265	-4.17105	-2.15632	-0.176401	-0.800029	-0.94383	-1.89812	-0.569676
nw>contig11632|size1147|read675|cov22.08_597136	H-probe	0	-0.515114	0.138807	0.309208	0	0	0	0	0	0	0	-0.602865	1.03444	0.772159	0.166098	-0.479388	0	0	0	0	0	0	0		1.03325	0.209721	-0.22982	0.289151	1.20583	1.33492	0	0.698714		1.07647			0	-0.515114	0.158693	0.798447	0.734246	0	1.28005	0	0	0	0	0.952685
nw>contig11632|size432|read115|cov12.51_172805	H-probe	-2.02077	-1.3673	-1.96679	0.457005	0.778772	1.37896	0.693614	0	1.72328	0	0	-0.602865	-0.986331	-1.3673	-1.96679	-0.838591	0	1.67643	-0.744548	0.990922	0.420972	1.20628	0		-2.02077	-1.3673	-1.29327	-0.0700534	0.72539	0	-0.744548	1.16743		0			-0.977609	-0.12463	-0.570736	-0.0625941	0.734246	0	1.20291	1.55393	0.190789	0	0	0.952685
nw>contig11635|size81|read13|cov8.19_0807	H-probe	-1.46869	0.508929	-1.77746	-0.290049	-5.61573	-1.91679	0.144893	-1.31685	0.0596287	-4.0254	3.54123	-5.34319	-1.4782	-1.27504	-2.04248	-2.30403	-2.86014	-3.62572	-0.123099	-0.632303	-0.823818	-1.72585	4.55042		2.0384	1.93125	0.406934	0.503721	-1.44899	-3.232	0.691137	0.558407		0.661569			-0.623256	-0.4834	-1.83826	-3.77796	-3.23658	-3.38717	-1.9021	1.09011	-1.17243	-2.19362	0	-0.528007
nw>contig11639|size77|read15|cov9.64_11810	H-probe	0.147279	-2.07213	-1.72818	-0.813693	-1.58659	-2.35072	-2.86541	2.19009	0.909526	-2.382	-3.85386	-1.55563	-0.261457	0.573209	-2.03027	-0.887869	-1.7574	0.369373	-2.80934	-0.587165	-0.865275	-3.14696	-4.43277		3.79502	2.43674	1.50437	3.2593	2.0362	2.57817	-0.217133	5.18405		0.562735			-0.171257	-1.38596	-2.90122	-0.102895	-1.95498	-2.04597	-2.82556	2.92026	0.576023	-2.00211	-3.27458	-1.70592
nw>contig11639|size87|read60|cov24.36_0137	H-probe	1.44127	0.784212	0	-0.400107	0	0	0	0	0	0	0	0	0	0.782686	0	-0.400107	0	0	0	0	0	0	0		1.03325	0	1.47761	-0.400107	1.20583	0	0	0		0			0	0	0	-0.400107	0	0	0	0	0	0	0	0
nw>contig1164|size87|read127|cov73.34_22816	H-probe	1.99157	2.27554	0.0735161	1.30009	-1.91047	0.286694	2.18617	0.183058	-1.31216	-3.37448	0	-3.23954	-0.287078	0.0855607	0.266635	0.0988107	0.281688	-1.46184	1.45893	0.460709	0.269923	0.143968	0		5.25791	4.53901	2.91693	2.48819	2.11876	0.814832	3.38619	2.41266		1.8147			-0.272112	0.802097	-0.336864	-1.5702	-1.54359	-0.269159	0.410464	1.47193	-0.604981	-0.498575	0	-3.23954
nw>contig11642|size86|read39|cov20.33_5812	H-probe	-1.90554	-3.16288	-1.77559	-0.194659	-0.435921	2.32251	-1.10051	0.403427	0.704982	-1.14967	-3.99452	-3.26156	-1.71612	-0.0016185	-2.33373	-1.24956	-1.09392	2.92393	-2.13782	-2.25046	-0.63144	-3.54156	-3.99452		2.94689	2.07451	2.10673	2.7158	3.63747	5.34298	1.49592	3.39978		0.180635			-1.70459	-1.25435	-1.91847	-0.221087	-0.0690392	1.72514	-0.969079	0.912185	-0.0477045	-1.48141	-3.09856	-3.26156
nw>contig11643|size103|read79|cov27.86_41138	H-probe	0	1.92007	-0.591936	0	-0.883673	0.84832	0.904046	0	0	-0.951837	0	0	0	-0.284931	-0.135695	0	-0.883673	0	0.460964	0	0	-0.951837	0		3.05769	3.23151	0.551818	1.26729	1.59489	0	1.16824	0		0.73421			1.04316	-0.284931	-0.1431	0	-0.883673	1.72514	-0.534116	0	1.24543	0.0885456	0	0
nw>contig11644|size98|read20|cov8.06_30813	H-probe	-1.39772	0.990038	-1.56949	0.271895	-4.81593	-2.87534	-0.873967	-3.08302	-0.618412	-5.34998	1.9756	-3.42149	-2.22935	-1.03356	-1.62836	-0.85252	-3.13609	-4.0874	-0.493916	-1.38344	-0.668116	-1.17822	2.60502		2.22342	2.29082	0.840856	1.44497	-1.73895	-3.39239	-0.256128	-1.07734		1.16175			-1.29232	-0.261185	-2.01216	-1.61185	-4.2851	-4.22222	-1.97134	-0.0941251	-0.95283	-0.824105	-1.41409	-0.576841
nw>contig11645|size423|read79|cov8.70_153814	H-probe	0.102703	0.252386	0	-0.777163	-0.883673	0.84832	0	0	0.835108	0	0	-0.748964	-0.304129	-0.531826	0.631622	0.0265786	0.407933	1.06914	0.99508	0	-0.361446	0	0		-1.33857	1.32051	0.673517	1.60723	0.322154	1.33492	0	1.16743		0			-1.33857	-0.531826	0	-0.777163	-0.883673	0.822693	0	0.961223	-0.361446	0	0.895964	-0.748964
nw>contig1165|size307|read746|cov113.24_88820	H-probe	-0.68337	-0.282292	-0.267027	-0.773665	0.770309	3.03626	0.979125	1.00933	-0.374003	-0.354929	-3.13956	-0.667983	-0.454426	-1.24101	-0.430143	-0.744544	2.15897	2.1025	0.807363	-0.00870661	-1.67631	-1.21435	-3.13956		2.44239	1.83696	1.82944	2.00772	4.18961	4.02024	1.869	3.05143		0.882566			-0.440689	-1.09292	-0.686612	-0.174926	0.985848	0.822693	-0.044094	2.30804	-1.41419	-1.38024	-1.29857	-0.794973
nw>contig11651|size81|read15|cov9.30_18817	H-probe	-1.08362	0.9773	-1.12416	-0.0277718	-3.98113	-1.05697	0.258869	0.183058	-0.504849	-4.35558	-1.12948	-3.28571	-1.52131	-0.996755	-1.44642	-0.29758	-1.42484	-2.41036	0.181487	0.460709	0.37227	-0.681262	-1.12948		1.1839	1.6513	0.628826	0.770511	-0.601577	-0.949846	1.07244	1.66017		0.595798			0.201275	-0.194023	-0.997411	-2.64022	-1.90737	-1.27246	-1.66926	1.74478	-1.04986	-1.28563	-0.23352	-0.155136
nw>contig11654|size102|read105|cov39.78_28140	H-probe	-2.02077	0.0957647	0.918629	-0.249203	-1.42768	0.84832	-0.945143	1.3291	0.835108	-1.19456	0	-1.02677	-2.02077	-1.19366	0.456297	-0.227932	-0.641916	0	0.0499373	0	0.621869	-1.19456	3.61071		0.35399	0.37103	0.808387	0.386571	0.425675	1.33492	-0.945143	2.58122		1.24785			-0.977609	-1.19366	-0.321951	-0.768802	-0.693431	1.34336	-0.945143	0	1.25036	-1.19456	0	-1.02677
nw>contig11654|size78|read17|cov10.21_11818	H-probe	-2.48207	0.731783	-1.45458	0.816209	-1.42768	-0.922042	-0.999801	-0.999629	1.58818	-0.391157	0	0	-0.851374	-0.931086	-0.0497255	0.324354	-0.641916	-1.77036	-0.999801	-0.999629	-0.253327	-0.391157	0		-0.852952	1.16097	1.21322	0.289151	0.665456	1.05551	-0.999801	-0.999629		-0.391157			-0.0916965	2.03826	-0.827973	-0.479388	-1.42768	-1.77036	-0.999801	-0.293601	-0.253327	-0.391157	0	0
nw>contig11663|size162|read35|cov10.50_46821	H-probe	-2.83107	1.34377	-1.02657	-0.731219	-1.35225	0.552148	0.853332	-0.999629	0.059586	-2.22621	-1.12948	-1.83207	-1.20037	-1.56523	-0.722107	-1.08437	-0.169022	-0.0939309	1.99192	-0.999629	-0.153653	-2.22621	-1.12948		2.32025	1.51077	0.99604	0.72623	1.98449	1.05551	3.03242	1.42298		0.216196			-0.440689	-0.502261	-1.3369	0.34271	-0.0207759	-0.947668	0.695216	0.390213	1.21711	-2.22621	-0.23352	-1.83207
nw>contig11671|size113|read53|cov22.15_11826	H-probe	0.77765	-2.21409	-1.99158	-0.167984	-0.83209	-1.27558	-1.66764	2.96459	0.690902	-1.47587	-2.15058	-0.942487	-0.105433	-0.615253	-1.68146	-0.513382	-0.695929	0.0772766	-1.29198	1.57285	-0.41052	-2.33529	-2.08109		2.97445	1.91416	1.5665	2.6471	2.55409	2.91034	1.01396	5.81895		0.769559			-0.0916965	-1.44975	-1.36759	-0.0387416	-0.696201	-1.01489	-1.02472	4.0544	0.341439	-0.889912	-2.08405	-1.09418
nw>contig11672|size111|read21|cov8.22_44827	H-probe	-1.33857	-0.777914	-0.81032	-1.41823	-1.82179	0	-0.534116	0	-1.03287	-1.43043	-1.75515	-0.226466	-1.33857	-1.56213	-0.783028	-0.101363	-1.82179	0	0.460964	0	-1.03287	-1.43043	-1.75515		0.290555	0.00256261	1.45851	1.14854	0.816694	2.01622	-0.534116	2.58122		-0.35396			-0.295407	-0.810936	-1.85246	-0.642233	-1.82179	0	-0.534116	0.724583	-0.279738	-0.390047	-0.859185	-1.90901
nw>contig1168|size109|read118|cov49.61_11831	H-probe	-1.65783	0.984947	-1.38523	0.227557	-4.74365	-3.04537	-1.0646	-3.65832	-0.330434	-7.21249	2.5514	-4.74316	-2.21672	-1.04602	-2.49984	-0.913959	-3.10118	-4.48229	-0.492801	-1.00556	-0.302254	-1.80018	3.97771		2.29265	2.44375	0.812263	1.81862	-2.01904	-3.43016	-0.700628	-1.30323		0.995096			-1.04426	-0.331389	-1.82723	-1.71254	-4.33577	-4.38746	-2.44053	0.268098	-0.574197	-0.900144	-1.53517	-1.15896
nw>contig11682|size78|read25|cov15.73_5829	H-probe	-1.33857	1.49938	1.37236	-0.713002	-1.35225	-0.775663	-0.807184	0	0	-0.951837	0	-0.422548	-1.33857	-1.09877	0.631622	-0.713002	-0.465623	-1.47257	0.771215	0	0	-0.951837	0		2.18075	1.37865	2.19211	1.6714	0.167665	-0.0645963	-0.807184	0.698714		-0.951837			-0.295407	0.509827	0	0.0629955	-2.13102	-1.19835	0.472861	0.961223	0.753132	-0.951837	0	-0.422548
nw>contig11686|size106|read33|cov15.30_44830	H-probe	-1.74345	1.10739	-1.63937	-0.0721987	-4.63041	-2.92736	-1.1594	-2.53686	-0.35036	-6.65339	-0.724437	-5.8793	-2.25623	-0.798177	-2.22683	-1.14858	-3.10932	-4.14468	-0.501087	-1.38478	-0.426117	-1.80352	2.53985		2.16705	2.47024	0.610923	1.2323	-1.86282	-3.39768	-0.627138	-0.454737		0.734803			-1.06008	-0.129458	-1.97101	-1.84673	-4.33818	-4.18884	-2.28551	0.0543653	-0.741429	-1.19779	-2.79518	-1.17559
nw>contig11687|size1946|read1148|cov21.97_1314142	H-probe	0	0	-0.290142	0.788596	0	0	0	0	-0.698952	0	0	0	0	0	-0.903337	0	1.29161	0	0	0	-0.698952	0	0		0	1.85234	0.227536	0	0	0	0	0		0			0	0.75119	-0.903337	0	0	0	1.28005	0	-0.698952	0	0	0
nw>contig1169|size70|read19|cov13.84_0834	H-probe	-0.275782	1.77375	-2.61247	0.385355	-3.6915	-1.38354	-0.218685	-1.75715	-0.373084	-4.26016	1.01557	-2.99888	-0.472203	-0.200247	-1.05446	-0.669164	-2.07936	-3.1934	-0.0225813	-1.64141	0.146526	-1.588	0.369838		2.09181	2.31537	-0.490548	0.957733	-0.539835	-1.66921	0.43301	0.573497		1.38548			0.434336	1.19007	-2.1788	-1.83553	-2.92937	-2.75914	-1.44464	0.834866	0.628568	-0.795048	-1.35677	-2.23143
nw>contig11693|size100|read103|cov38.52_27143	H-probe	0	0.405938	-0.407493	-0.339169	-0.849267	0.300581	0.466909	0.32947	-0.230616	0.411146	0	-1.13705	0	-1.57207	0.541377	-0.314585	-0.465623	-0.0939309	-0.681897	1.57017	-2.07212	0.573296	0		2.04958	0.677317	1.03629	1.11828	0.782297	0.245856	0.0253747	2.1862		0.443489			1.64223	-0.00451641	-0.379509	0.180441	-0.550592	0.505695	0.270477	0.965409	-0.826687	-0.632981	0	-1.13705
nw>contig11695|size168|read98|cov22.08_78144	H-probe	-1.33857	0.499281	-0.903337	-0.479388	0	0.84832	-0.321848	0	-0.361446	-0.84003	0	-0.602865	-1.33857	-0.284931	-0.271715	0.324354	0	0	0.673232	0	1.61345	-0.84003	0		0.290555	1.56741	0.853612	0.289151	0	1.33492	2.13984	0.698714		-0.84003			-1.33857	-0.284931	0.158693	0.29661	0	0.822693	-0.321848	0.395779	-0.361446	-0.84003	0	-0.602865
nw>contig11697|size96|read29|cov14.50_32833	H-probe	0	-1.08849	-1.4856	0.0755939	0	0	0	0	-0.93209	-1.40724	0	0	0	-1.08849	-0.853978	-0.713002	0	0	1.5784	0.990922	0.0512248	-1.40724	0		2.63995	1.38892	1.73618	2.41446	2.91331	3.10652	2.46169	1.16743		-1.40724			1.04316	-1.08849	-0.858989	0.564832	0	0	0	0.395779	-0.178958	-1.40724	1.44451	0
nw>contig1170|size118|read199|cov82.38_15840	H-probe	-1.12412	1.14383	-1.17548	-0.496615	-4.33292	-1.04089	0.432784	-0.786479	-0.995005	-3.11805	-1.12948	-4.69553	-2.33249	-0.802644	-1.1254	-1.30697	-1.5218	-2.70785	0.922676	0.488887	-0.777885	-1.0174	-1.12948		3.53337	2.93204	1.56703	1.10894	-0.169928	-1.36273	1.42214	1.44313		0.889072			-0.497334	-0.0403124	-0.964195	-2.96926	-2.28627	-1.85546	-0.0827159	1.58996	-1.07246	-0.280705	-1.12948	-0.345415
nw>contig11705|size122|read42|cov15.72_40836	H-probe	0.599066	-1.74397	-0.389896	-1.10134	-0.0772902	3.29343	-0.0859059	2.00881	-0.262258	-1.2591	-4.4009	-3.71572	0.355872	-1.22205	0.318653	-0.750928	0.371887	3.1189	0.741626	1.26611	-1.32431	-2.71059	0.149522		3.95079	2.11315	1.76828	1.53991	3.43577	5.28781	1.86495	4.42993		0.749608			0.859802	-1.20674	-1.15537	-0.553972	0.729694	2.67377	-0.309435	2.19053	0.518503	-0.384838	-0.793143	-1.42916
nw>contig11707|size71|read17|cov11.77_8838	H-probe	2.73335	2.20901	-0.0605786	0.602904	-0.699605	-0.180424	1.3403	-0.18533	-0.964407	-2.68557	3.54123	-1.68259	1.69341	-0.440541	-1.05965	-0.415021	-0.510563	-1.99361	1.58314	-0.580122	-0.607263	-0.810625	3.61071		6.10182	3.93436	1.71468	2.38954	1.67641	-0.0166574	2.30557	2.68487		1.40202			1.49757	-0.233593	-1.57084	-1.89143	-1.82645	-1.05708	-1.18363	1.22291	-1.34029	-0.79704	0	-1.07857
nw>contig11709|size94|read46|cov24.03_34839	H-probe	-0.197826	-1.92249	-1.56843	-0.567221	-1.57494	-2.18374	-2.10555	1.92982	1.10783	-1.83472	-3.9668	-1.53922	-0.398204	0.560902	-1.70027	-0.632865	-1.66889	-0.0921331	-2.35214	-0.888526	-0.566487	-4.02259	-3.67272		3.29496	2.40336	1.60824	3.13587	1.90363	2.16572	0.445719	4.92486		0.91188			-0.280119	-1.17868	-2.47086	-0.0105075	-2.09008	-2.28446	-2.22163	2.64694	0.545313	-1.66324	-2.96204	-1.35605
nw>contig1171|size80|read112|cov63.27_19845	H-probe	-1.36251	1.18537	-1.74382	0.0560593	-4.86782	-3.00981	-0.867648	-2.66775	-0.423893	-5.85862	0.715904	-5.4814	-2.27973	-0.696832	-2.60681	-1.16594	-3.19775	-4.31443	-0.450408	-1.27664	-0.378279	-1.62514	3.2026		2.26528	2.57903	0.418427	1.40964	-2.00268	-3.58129	-0.687806	-0.725272		0.863732			-1.10787	-0.0459939	-2.149	-1.86891	-4.48699	-4.19502	-2.17242	0.133503	-0.668196	-1.06819	-2.23184	-1.29874
nw>contig11713|size86|read17|cov9.31_17843	H-probe	1.44127	-0.539388	0.520898	0.0114329	-0.883673	0	-0.321848	0	-0.860191	-0.391157	-1.12948	-0.422548	0	-0.539388	0.54819	-0.777163	1.07832	0	-0.321848	0	-0.860191	-0.391157	-1.12948		0	1.0253	0.956364	1.15421	-0.158283	0	-0.321848	0.698714		0.685313			0	0.703283	0.105365	1.41246	-0.149427	0.822693	-0.321848	0.395779	-0.860191	-0.391157	-1.12948	-0.422548
nw>contig1172|size114|read130|cov56.96_52851	H-probe	-1.65428	0.929562	-1.58238	-0.0299991	-4.71432	-2.9033	-1.20693	-2.75589	-0.440875	-5.68384	-0.47341	-4.79599	-1.97142	-1.03287	-2.28504	-1.10972	-3.11637	-4.21306	-0.557383	-1.59902	-0.556148	-1.95883	2.06559		2.31479	2.29116	0.700151	1.24669	-1.79789	-3.42406	-0.606705	-0.427907		0.674888			-1.11188	-0.284128	-1.98147	-1.77866	-4.3314	-4.14526	-2.2508	0.0222963	-0.883501	-1.20267	-3.8267	-1.32009
nw>contig11721|size136|read31|cov10.45_36846	H-probe	-2.02077	-0.564345	-0.628732	0.390534	0.778772	0	-0.58483	0.81248	0.305805	-0.983536	-1.12948	1.25999	-0.390069	-0.565871	-1.24193	0.0373867	1.29161	0	-0.58483	0	0.0925658	-0.983536	-1.12948		0.35399	1.79427	0.515022	1.44917	3.24694	1.33492	1.11752	2.04099		0.0929336			-0.378542	-1.34856	-1.24193	-0.00164592	1.21851	0	-0.58483	0.976786	0.354683	-0.983536	-0.23352	-0.422548
nw>contig11725|size92|read22|cov12.08_32847	H-probe	-0.936813	-0.863888	-0.160682	-1.30898	-0.352132	0.39316	-0.18251	0.425902	-1.75845	-2.06855	-3.63508	-2.48281	-0.960944	-0.543316	-0.48829	-0.562755	0.476372	1.51079	0.624687	-0.571836	-0.405057	-2.03445	-7.17631		2.71819	2.58565	2.54584	2.96468	3.75767	4.07708	2.31956	3.70716		1.02625			-0.668362	-1.20022	-1.50507	-0.0177594	0.064071	0.173208	-0.121646	1.71127	-0.423912	-1.12901	-2.79782	-3.01199
nw>contig11726|size109|read71|cov22.56_1848	H-probe	-0.34467	-1.57722	-0.912575	-2.35077	-0.122666	-0.657815	-0.638235	1.42141	-0.379199	-0.829532	-3.15914	0.771898	-0.620454	0.0402039	-0.663944	-2.06389	0.127316	1.79594	-0.52306	-0.207593	-0.367961	-2.3111	-3.08661		3.09091	2.49673	2.52422	1.5527	3.55675	4.03603	2.03194	3.9663		1.44321			-0.216181	-1.42725	-2.16626	-1.58677	-0.277753	-0.136906	-0.721362	2.14576	0.0066611	-0.286903	-3.59305	-1.72804
nw>contig11727|size86|read31|cov17.48_14849	H-probe	-1.01439	0.443654	-1.90245	-0.369019	-4.15542	-2.82782	-1.05273	-2.6458	-1.93319	-4.83259	-2.45948	-4.43932	-1.04352	-1.29879	-2.19891	-2.28986	-2.82163	-3.73843	-0.513257	-0.584428	-1.53377	-1.68782	1.15123		2.69798	1.83744	0.480194	0.999403	-1.25554	-3.46894	-0.416555	0.295094		0.266115			-0.194219	-0.385766	-2.05361	-2.18268	-3.58169	-3.79155	-2.19556	0.498087	-1.44327	-0.851214	-1.56351	-1.02015
nw>contig11729|size115|read25|cov10.30_8850	H-probe	-1.52724	0.740191	-1.43792	0.146773	-4.72809	-2.96458	-0.996287	-2.93509	-0.979692	-4.9939	1.94212	-2.49243	-2.38888	-1.28715	-1.26197	-0.82156	-2.98251	-3.95166	-0.405287	-1.40485	-0.900981	-1.45173	1.44239		2.35371	2.08492	0.949668	1.2964	-1.73684	-3.33928	-0.377879	-0.815056		0.981987			-1.27168	-0.524408	-1.97123	-1.61658	-4.29852	-4.10379	-2.13668	0.0666592	-1.1166	-0.84758	-1.45278	-0.498558
nw>contig11729|size394|read410|cov39.14_257149	H-probe	0	-0.906787	-0.521246	0.388489	0	0	0	0.81248	-0.468746	0	0	-0.894544	0	-0.906787	0.54819	-0.400107	0	0	0	0	-0.468746	0	0		0	0.657902	0.152271	1.2371	1.56562	0	1.70235	0.698714		1.07647			0	0.335884	0.105365	-0.400107	0	0	0	0	-0.468746	0	0	-0.894544
nw>contig11732|size135|read48|cov16.96_1852	H-probe	-0.579498	1.55881	-0.532692	0.788596	-3.47778	-1.63581	0.438361	0	1.19655	-1.65579	0	-1.90262	-2.02077	-0.193318	-1.57484	0	-1.81239	-3.70675	0.578598	1.57285	0.983315	-1.65579	0		2.12865	3.28008	-0.0972267	1.63721	-0.564465	-0.365382	-0.999801	1.16743		1.80099			1.64236	1.48875	-0.948225	0.775997	-1.60826	-2.36339	-0.999801	1.82633	1.24543	-0.0172334	0	-1.90262
nw>contig11739|size742|read444|cov22.92_263150	H-probe	0	0	0.613195	-0.479388	0	0	0	0	0	-0.391157	0	0	0	0	0.631622	-0.479388	0	0	0	1.57285	0	-0.391157	0		1.62912	0.724835	0	-0.479388	0.72539	0	0	0		-0.391157			2.39038	0	1.06203	-0.479388	1.21851	0.822693	0	0	0	-0.391157	0	0
nw>contig1174|size74|read33|cov21.81_13858	H-probe	1.23703	2.403	-1.10294	-0.209502	-1.45926	-0.482049	0.136579	-0.799228	-0.770444	-4.12664	0.219248	-1.98263	-0.403442	-0.29957	-1.2761	-0.877025	-0.416978	-1.3905	1.25144	-2.27751	0.386355	-1.48749	1.79273		4.79713	4.5021	1.54475	1.73168	2.29594	0.231247	2.84115	2.12807		1.37654			-0.610984	0.748929	-2.37931	-2.74555	-1.64892	-1.48283	-3.73901	1.01056	-0.00817469	-1.25073	-0.914826	-0.00561404
nw>contig11741|size85|read21|cov8.91_7855	H-probe	-0.232745	-1.9602	-1.60018	-0.86986	-1.51737	-2.41599	-2.84019	2.24161	1.01794	-2.31008	-3.79044	-1.69699	-0.301292	0.622125	-1.73021	-1.0004	-1.80908	0.151864	-2.78542	-0.233679	-0.75086	-3.60888	-5.14403		3.65897	2.44055	1.6548	3.18701	2.00853	2.32005	-0.0744945	5.31898		0.589916			-0.224536	-1.24799	-2.5401	-0.190745	-1.98672	-2.12328	-2.58211	3.05397	0.473975	-1.88634	-3.21321	-1.51922
nw>contig11746|size116|read22|cov9.25_46856	H-probe	0	0	-0.579908	-0.400107	0	0.84832	-0.562987	0	-0.698952	0	0	0	0	0	-0.579908	-0.400107	1.29161	0	-0.562987	0	-0.698952	0	0		0	0.724835	-0.579908	-0.400107	0	0	-0.562987	0		0			1.04316	0	-0.579908	-0.400107	0	0	-0.562987	0.706028	0.0541799	0	0	0
nw>contig11747|size113|read57|cov24.20_52857	H-probe	0.0522797	-1.4964	-0.453839	-0.957505	-0.00745682	-0.104149	0.50695	0.831545	-1.58264	-1.31777	-1.40883	-1.02716	-0.384348	-0.528228	-0.492534	-1.06695	-0.0298594	0.240698	0.365158	0.556455	-0.468206	-1.75496	-1.81215		3.32401	2.31414	2.51495	2.4722	3.8493	3.20977	2.77699	3.88021		1.23238			-0.416581	-1.44886	-1.7451	-0.305677	-0.172985	-0.8673	0.315997	1.75728	-0.468025	-1.0504	-1.50284	-1.81315
nw>contig11751|size76|read17|cov11.22_1859	H-probe	-1.69098	0.405054	-1.75383	-0.568206	-4.48559	-2.83077	-0.916427	-2.03104	-1.55219	-4.43953	1.01891	-4.2343	-1.91034	-1.47011	-1.46496	-1.88005	-2.9972	-3.83851	-0.700493	-1.09863	-1.85946	-1.48396	1.99335		2.0304	1.68329	0.719175	0.554347	-1.57989	-3.34466	-0.366486	-0.179402		0.787819			-1.16715	-0.68803	-1.99856	-2.43542	-4.12672	-4.12321	-1.97466	0.284729	-2.16547	-1.16345	-1.22237	-0.836599
nw>contig11754|size104|read25|cov11.44_6861	H-probe	-0.30344	-1.7691	-1.09343	-0.747842	-1.68959	-1.88048	-2.08476	1.10015	0.683585	-1.323	-1.6947	-2.62899	-0.964366	0.091963	-1.22531	-1.01384	-2.31202	-0.870823	-2.3312	-0.539162	0.301808	-0.836002	-6.1726		2.86492	2.53105	2.33894	3.16743	2.07539	1.74827	0.728851	4.6223		1.59128			-1.41111	-1.08303	-1.9808	0.104482	-1.72895	-2.90353	-1.38946	2.39943	0.124538	-1.59477	-2.56484	-1.40769
nw>contig11759|size112|read23|cov10.45_52865	H-probe	-1.17295	0.740205	-1.33266	0.0887943	-3.66509	-1.37009	0.379127	-1.36819	-2.8346	-2.80457	-1.75515	-2.66896	-1.4398	-1.9067	-1.01359	-1.39644	-1.34062	-2.94764	0.564747	-0.76451	-1.24222	-1.3815	-1.75515		3.93046	2.71911	1.78254	1.50811	0.175369	-1.93216	1.33006	0.645858		0.504191			-0.502726	0.0149371	-1.4362	-2.57534	-1.77661	-1.97832	-0.520319	0.708295	-1.21425	-0.951192	0.0858417	-2.33779
nw>contig11760|size134|read33|cov11.80_54866	H-probe	-1.33857	1.00449	-0.992412	0.788596	-1.42768	-1.16275	0	0	0	-1.16722	0	0	-1.33857	-0.284931	-0.992412	0	-0.641916	-2.54171	0.99508	0	0	-1.16722	0		0.290555	2.19248	0.764537	1.63721	-0.22185	-2.54171	1.70235	1.16743		0.518831			-0.295407	0.466259	-0.992412	0	-1.42768	-2.54171	0	0.395779	0.753132	-1.16722	0	0
nw>contig11764|size103|read23|cov10.92_19868	H-probe	-0.579498	-1.92165	-1.49612	-0.790693	-0.995972	-1.69339	-1.3728	-0.91049	1.2777	-2.67679	-4.28561	-0.72212	0.0305844	0.435696	-1.46018	0.0424165	-0.982038	0.382216	-3.51668	0.0804323	-0.662378	-2.67679	-4.28561		3.59819	1.99444	2.0838	2.97191	1.85861	2.12287	0.100563	4.03936		1.1618			-2.02077	-1.96841	-1.74095	-0.568078	-1.71374	-2.54171	-1.11467	1.90501	-1.47192	-0.290783	-2.13394	-0.1181
nw>contig11766|size119|read21|cov8.73_47869	H-probe	-1.33857	-1.09364	0	-0.400107	-1.42768	-1.69339	1.11631	-0.999629	0	-0.897016	0	0	-1.33857	-0.310953	0	-0.400107	-0.641916	-1.47257	1.25655	-0.999629	0	-0.897016	0		-1.33857	-0.368803	0	0.368431	-1.42768	-1.20679	-0.321848	-0.300915		0.179454			-0.295407	-0.342449	0	-0.400107	-1.42768	-1.71902	-0.321848	0.178361	0.753132	-0.897016	0	0
nw>contig11768|size131|read38|cov13.34_1871	H-probe	-2.02077	0.784212	0	0	0	0	0	0	0	0	0	0	-2.02077	0	0	0	0	0	0.99508	0	0	0	0		-0.987523	1.20503	0.673517	0	0.72539	0	0	0		1.07647			-2.02077	0	0	0	0	0	0	0.395779	0	0	0	0
nw>contig1177|size85|read53|cov31.22_5877	H-probe	-1.19051	1.12676	-1.75937	0.289249	-4.73792	-3.05519	-1.02177	-2.53913	0.937789	-5.94966	3.82892	-5.88269	-2.1103	-0.614019	-1.77904	-0.886328	-3.13952	-4.35218	-0.475724	-0.650345	0.474561	-1.65676	4.76846		2.24179	2.70505	0.545471	1.55936	-1.87944	-3.59409	-0.811751	0.0243472		0.88829			-0.989863	-0.0791656	-2.01719	-1.66796	-4.2831	-4.05529	-2.17199	0.738808	0.143256	-1.18152	-0.349124	-0.814756
nw>contig11770|size144|read278|cov69.09_21153	H-probe	0	-1.05114	-0.199783	-1.41823	-1.42768	-0.391403	0	-0.999629	0.634211	-1.10064	-1.12948	-0.894544	1.03444	-0.680185	-0.610305	-0.101363	-0.136072	-0.0939309	1.5784	-0.999629	-0.562343	0.105633	-1.12948		4.455	1.53786	1.28405	1.82094	1.21081	0.706752	0	0.167802		0.585403			0	-1.58937	0.154124	0.231211	-0.693431	-1.77036	1.94745	0.191763	0.190789	-0.0602612	-0.23352	-0.894544
nw>contig11772|size82|read21|cov12.60_7872	H-probe	0.154247	-1.96559	-1.74164	-0.541057	-1.61606	-2.2455	-2.76173	2.17115	0.801386	-2.14981	-3.46312	-1.30649	-0.608871	0.473384	-1.87044	-0.83797	-1.69701	0.0506394	-2.75607	-0.485641	-0.987274	-3.35159	-4.0175		3.60715	2.37826	1.48002	3.17872	2.01865	2.30536	-0.21423	5.22251		0.830603			-0.281539	-1.34599	-2.85698	-0.0881274	-1.90834	-2.14101	-2.97403	2.94012	0.460281	-2.06385	-3.17556	-1.58114
nw>contig11774|size76|read25|cov15.72_15874	H-probe	2.97497	-1.70114	-0.294842	-1.09288	-0.648905	0	-0.534116	-0.91049	-1.09684	-0.736268	0	0	1.6307	-0.918456	-1.6672	-1.07773	-0.641916	1.06914	0.460964	-0.91049	-1.09684	-0.736268	3.61071		2.86389	1.08009	1.12973	1.24599	1.21081	2.82587	-0.534116	1.33389		-0.736268			1.64223	-0.0925492	-1.6672	-1.10548	-1.42768	0	-0.534116	-0.491738	0.148596	-0.736268	0.895964	0
nw>contig11775|size132|read24|cov8.76_46875	H-probe	0	0.761941	-0.52693	0.594201	0	-0.00431392	-0.321848	-0.91049	-0.361446	-0.897016	0	0	1.6307	-0.118242	-0.82985	-0.272071	1.29161	-1.77036	-0.321848	-0.91049	1.20123	-0.897016	3.61071		3.22851	1.39664	0.897637	0.855557	2.29868	-1.77036	1.3805	1.1305		-0.897016			1.04316	0.707664	-0.837255	-1.07581	0.734246	-0.947668	0.958197	-0.204462	-0.361446	-0.897016	0	1.55555
nw>contig1178|size101|read508|cov227.25_11879	H-probe	0.0679636	-1.99132	-1.6353	-0.785167	-1.60919	-2.47167	-2.73057	2.06896	0.85371	-2.19583	-3.77257	-1.43453	-0.406204	0.585285	-1.95671	-0.871485	-1.71084	0.305132	-2.69491	-0.606008	-0.923187	-3.20324	-4.20478		3.70489	2.45977	1.6262	3.28281	2.01698	2.55989	-0.117725	5.06632		0.634585			-0.249658	-1.35477	-2.75267	-0.0470705	-1.99347	-2.18468	-2.80702	2.81635	0.52374	-1.96762	-3.21238	-1.56833
nw>contig11789|size126|read27|cov10.39_27878	H-probe	-0.091739	-0.971012	-1.18302	-0.626009	0.273345	0.494552	0.329795	1.46957	-3.22617	-2.69982	-1.75515	-1.38057	-1.21438	-1.35151	-0.574902	-0.448755	1.14518	0.382216	0.809597	0.986733	-0.0860376	-2.53767	1.85556		1.76789	1.65252	1.29364	2.46206	3.37448	2.12287	2.16914	3.76423		0.302563			-0.194219	-0.964175	-1.65713	0.393372	0.526215	0.577155	0.106267	2.77537	-1.07976	-2.10538	0.396519	-1.50756
nw>contig11793|size127|read25|cov8.74_25880	H-probe	1.44127	0.499281	-0.903337	0.788596	0	0	1.11631	-0.999629	-0.698952	0	0	-0.602865	0	1.91722	-0.903337	0	0	0	-0.321848	-0.999629	-0.698952	0	0		1.62912	1.27976	0.227536	1.63721	2.09313	0	-0.321848	-0.999629		1.68605			1.04316	1.6153	-0.903337	0	0	1.34336	-0.321848	-0.999629	0.0541799	0	0	-0.602865
nw>contig11794|size118|read49|cov18.45_6881	H-probe	0	-0.607319	0.737548	1.94583	0.398079	-0.391403	0.331965	1.3291	-1.67806	-1.8882	-1.75515	-2.03414	0	-0.982915	0.501521	1.02369	0.781723	-1.77036	-0.111116	0	-0.115391	-0.0342712	-1.75515		3.22851	1.16153	2.64624	2.87474	2.93056	1.57101	0.596155	2.72411		0.554208			2.39038	0.0800506	-0.276726	0.679458	0.696754	-0.427005	0.173849	1.20467	-1.67806	-1.8882	-1.75515	-2.03414
nw>contig118|size78|read366|cov226.05_5910	H-probe	-1.55853	0.353941	-1.74148	-0.32427	-4.6632	-2.7755	-0.733408	-1.70447	-1.40504	-4.50229	1.46561	-4.16764	-1.97105	-1.50502	-1.42807	-1.954	-3.19572	-3.86376	-0.601675	-0.981879	-1.69238	-1.53876	2.09835		2.04787	1.72101	0.668924	0.637867	-1.70933	-3.31465	-0.243092	-0.033677		0.817624			-1.42094	-0.674253	-2.08992	-2.27717	-4.18418	-4.14619	-1.70319	0.467944	-1.97108	-1.07189	-1.24086	-0.695694
nw>contig1180|size89|read32|cov16.58_22883	H-probe	-1.7152	0.835126	-1.39366	0.0855698	-4.46954	-3.03066	-1.37721	-2.9564	-0.910791	-5.77988	1.62508	-4.22986	-2.05643	-1.04084	-1.13975	-1.35233	-3.17325	-3.88596	-0.792362	-1.32693	-1.28604	-1.62489	2.42052		2.17842	2.20703	0.99353	1.30859	-1.80066	-3.1156	-0.795618	-0.667251		0.852618			-1.29635	-0.459687	-1.88644	-1.81666	-4.33276	-4.19807	-2.3714	-0.000916007	-1.58744	-0.97765	-1.73678	-0.660683
nw>contig1181|size77|read72|cov46.90_11889	H-probe	0.099827	-2.01223	-1.6454	-0.771357	-1.6161	-2.4002	-2.76649	2.16745	0.867748	-2.2337	-3.73762	-1.48613	-0.338225	0.569892	-1.92024	-0.878716	-1.73448	0.336403	-2.76803	-0.48863	-0.893736	-3.2021	-4.19019		3.74775	2.4383	1.60719	3.27978	2.02487	2.59762	-0.146002	5.18414		0.569289			-0.154267	-1.36203	-2.76669	-0.0498327	-1.96815	-2.09316	-2.82532	2.91994	0.540202	-2.03255	-3.21731	-1.58033
nw>contig11810|size147|read33|cov10.45_41884	H-probe	0	-0.515114	0.613195	-0.400107	0	0	-1.45918	0	-0.253327	1.6435	-1.12948	0	0	-0.515114	0	-0.400107	0	1.06914	-1.45918	0	-0.253327	0	-1.12948		1.62912	0.209721	1.75695	0.86718	1.56562	2.47711	-1.45918	0.698714		1.07647			0	-0.515114	0.626611	-0.400107	0	0	-1.45918	0	-0.253327	0	-1.12948	0
nw>contig11812|size91|read23|cov12.01_26885	H-probe	0	0.244825	0.0332866	0.0114329	-1.82179	-1.77036	-0.321848	0	-1.44536	-0.391157	0	-0.422548	0	0.243299	0.0517139	-0.777163	-1.03603	-1.77036	-0.321848	0	-0.46205	-0.391157	0		4.455	2.49268	1.17704	0.860043	0.476891	0.245856	-0.321848	0.698714		-0.391157			1.64223	0.211802	0.816143	-0.00116552	-1.08755	-0.427005	-0.321848	0	-0.692233	-0.391157	0	-0.422548
nw>contig11818|size100|read25|cov12.25_13887	H-probe	-1.32527	0.284489	-1.4105	-0.0201265	-4.44709	-2.4903	-0.594023	-1.08663	-0.335092	-5.00797	1.90155	-4.68116	-1.8981	-1.47427	-1.10742	-1.61485	-2.98972	-3.47396	-0.392664	-0.490005	-0.556388	-1.79473	1.41086		2.14725	1.88582	0.807888	0.708768	-1.53055	-3.18383	0.067238	0.376289		0.74498			-1.45988	-0.557627	-1.98702	-2.10765	-3.81768	-3.78151	-1.22738	1.00302	-0.690029	-0.928634	-0.987891	-0.998494
nw>contig11819|size390|read174|cov20.54_1888	H-probe	1.44127	-1.18225	-0.162987	-0.287217	0	1.37896	0	-0.0980096	-1.39537	-0.897016	-1.64365	-1.68715	2.05135	-1.96647	-1.20513	-0.272071	1.29161	0	0.99508	0.0804323	-0.412053	-0.897016	-1.64365		2.04958	0.510949	1.32085	2.62021	2.63849	2.47711	3.61725	1.81362		1.54539			2.06426	-1.96647	-0.1431	0.573628	0	1.34336	0	0.0816937	-0.642236	0.143366	-1.64365	-1.68715
nw>contig11826|size113|read112|cov37.12_2156	H-probe	-1.3898	-0.76978	0.093582	0.0755939	-1.35225	-0.922042	0	-0.187148	-0.361446	-1.12012	0	-1.5343	-2.83107	0.517493	-0.31694	-0.713002	-1.34526	-1.77036	0.99508	-0.00870661	-0.361446	0.086154	0		0.397442	2.57192	1.96687	3.05928	-0.277666	-1.77036	2.9566	0.167802		0.993113			-1.78791	1.13045	-0.321951	-0.713002	-1.39677	-1.77036	0	-0.293601	0.391686	-1.12012	0	-1.5343
nw>contig1183|size88|read19|cov10.93_28894	H-probe	-2.02077	-2.32105	-0.992412	-0.713002	-1.42768	-0.922042	-0.321848	0	-1.16778	-0.951837	0	-1.89621	-2.02077	-2.32105	-0.992412	-0.713002	-1.42768	-1.77036	-0.321848	0	-1.16778	-0.951837	0		-2.02077	-2.32105	-0.992412	-0.713002	-1.42768	-1.77036	-0.321848	0		-0.951837			-2.02077	-2.32105	-0.992412	-0.713002	-1.42768	-1.77036	-0.321848	0	-1.16778	-0.951837	0	-1.89621
nw>contig11830|size102|read18|cov8.54_14891	H-probe	-1.65428	-2.08748	-1.18471	-0.959061	0.0188405	3.51162	1.45207	0.709081	-0.153434	-2.21948	-2.79473	-3.06883	-1.21438	-0.855628	-0.494967	-0.157513	0.657125	3.44409	1.55336	1.30775	-0.273895	-1.40968	-2.79473		2.47751	2.19982	1.40229	2.07636	3.65189	5.10842	3.28142	4.03493		0.682679			-0.737144	-0.845439	-2.53355	0.0517413	0.881393	2.67377	-0.29739	2.71191	0.15308	-1.20345	-0.953743	-1.51328
nw>contig11838|size86|read22|cov12.70_19893	H-probe	-1.5786	0.819446	-1.49688	-0.199782	-4.93271	-3.26633	-0.902066	-3.3641	-0.165521	-5.29785	2.29954	-4.14463	-2.38839	-0.925176	-2.22452	-1.07626	-3.03553	-4.8778	-0.283886	-1.24399	-0.373478	-1.20539	2.37314		2.21534	2.32253	0.63003	1.32357	-2.15869	-3.4563	0.0701716	-1.24832		1.14379			-1.08811	-0.215194	-1.74864	-1.94195	-4.49053	-4.37842	-2.16483	-0.104711	-0.574601	-0.862903	-1.84561	-1.19992
nw>contig11840|size106|read53|cov24.04_45895	H-probe	-1.14062	-2.19945	-0.999079	-2.1852	0.258077	-0.474783	-1.36285	2.22772	-2.37448	-1.76794	-3.04842	-2.53826	-0.580203	-0.109498	-0.752867	-2.42606	0.257708	1.89733	-0.780861	0.544868	-1.47298	-2.87534	-4.17195		2.51911	2.13302	2.12611	1.29947	4.20797	4.02115	1.32617	5.24443		0.536695			-0.848222	-1.60389	-2.232	-1.69366	-0.185793	-1.08599	-1.60999	3.19342	-0.480913	-2.24599	-2.47867	-2.70048
nw>contig11841|size90|read55|cov29.57_30896	H-probe	0.13081	-2.12037	-1.41514	-0.782106	-1.72794	-2.30505	-2.14108	1.94041	1.19658	-1.981	-3.28545	-1.22761	-0.0466512	0.361934	-1.55586	-0.695118	-1.76999	-0.137657	-2.35929	-0.562337	-0.655165	-3.59983	-4.2029		3.76822	2.26311	1.87103	3.10823	1.92015	2.07827	0.338643	4.86903		0.886495			-0.0297912	-1.39677	-2.40298	-0.0749687	-2.05543	-2.83669	-2.29269	2.68574	0.642259	-1.72836	-2.97612	-1.70048
nw>contig1186|size156|read341|cov91.75_45902	H-probe	-1.6706	-1.83224	-1.29444	0.132381	-2.11742	2.32251	-0.506681	2.00896	2.22182	-0.430644	-0.22046	-0.194538	-0.469955	0.525107	-1.5175	-0.796491	-1.92056	2.43101	-1.68558	0.990922	0.363569	-1.29006	-0.150975		2.88356	2.61215	1.63604	3.07586	1.04465	5.23046	0.250916	5.2148		1.64387			-0.455671	-0.428917	-2.0538	0.217517	-2.94136	2.02674	-2.71958	3.39394	-0.0278405	-0.857781	-2.31717	-1.57063
nw>contig11862|size155|read49|cov14.32_74899	H-probe	1.44127	-0.439716	-0.521246	-0.969983	-0.883673	0.84832	0.875175	-0.187148	-1.19657	-0.632981	-1.12948	-1.61275	0	0.0633448	-0.521246	0.346884	0.407933	0	-0.562987	-0.999629	-0.213257	-0.632981	-1.12948		2.37476	-0.499093	2.50369	0.667223	0.681945	1.33492	1.13936	0.804519		1.05307			1.64223	-0.472738	0.105365	-0.193985	-0.149427	0.822693	-0.562987	-0.275045	-1.19657	0.407402	-1.12948	-1.61275
nw>contig1187|size84|read238|cov119.79_24904	H-probe	-1.20788	-2.21382	-1.55142	-0.521342	-1.62976	-2.36106	-2.1395	1.80008	1.57551	-3.31801	-2.92621	-0.84001	-0.675042	0.0509148	-1.52314	-1.42775	-1.53737	-0.343323	-2.1566	-0.146242	-0.663089	-2.36623	-3.4169		3.26991	2.24941	1.97792	3.31649	2.12395	2.2504	0.56816	4.67337		1.02267			-0.368603	-1.53365	-2.08965	0.0812033	-1.6601	-2.59229	-1.57778	2.49617	0.688474	-2.05175	-3.36783	-1.79149
nw>contig1189|size127|read80|cov29.12_3909	H-probe	-1.67357	0.923201	-1.54688	0.0840154	-4.96255	-3.12333	-0.978442	-3.44339	-0.398024	-6.88575	1.91601	-4.48688	-2.29443	-1.03725	-2.25876	-1.06832	-3.1694	-4.42131	-0.485377	-1.37486	-0.52933	-1.54308	3.37878		2.16348	2.36047	0.717384	1.60526	-2.07585	-3.35272	-0.526414	-1.36012		1.10592			-1.27738	-0.346973	-1.91306	-1.81041	-4.45663	-4.32632	-2.20171	-0.1609	-0.779686	-0.883762	-1.61914	-0.890598
nw>contig1190|size115|read247|cov104.63_24913	H-probe	-1.78816	0.486676	-1.67968	0.128291	-5.0184	-2.87943	-1.27454	-3.24461	-1.07915	-5.3727	2.02365	-4.68805	-2.33378	-1.63351	-1.81152	-1.13856	-3.04215	-4.20331	-0.633783	-1.78551	-1.18878	-1.34831	2.60764		1.96146	1.7533	0.795666	1.43991	-1.86826	-3.25014	-0.863376	-1.09171		0.590816			-1.33164	-0.806133	-1.89102	-1.62446	-4.30302	-4.13324	-2.43264	-0.188081	-1.39441	-0.98594	-3.31863	-1.31634
nw>contig11901|size310|read198|cov23.83_24159	H-probe	0	0.784212	0	0	0	0.84832	0	0	0	0	0	0	0	1.28727	0	0	0	0	0	0	0	0	0		0	0.724835	0	0	1.20583	0	0	0.698714		1.07647			1.04316	0.75119	0	0	0	0	0	0	0.753132	0	0	0
nw>contig11903|size842|read895|cov39.19_284160	H-probe	0	-0.275907	-1.24193	-0.400107	0	1.37896	-0.58483	0	1.48006	-0.632981	0	-1.02677	0	0.50678	-1.24193	-0.400107	0	0	-0.58483	0.990922	-0.361446	-0.632981	0		0	0.448929	-0.111053	-0.400107	0.72539	1.33492	-0.58483	0.698714		-0.632981			0	-0.275907	-0.615316	-0.400107	0.734246	0	-0.58483	1.00742	-0.361446	-0.632981	0	-1.02677
nw>contig11904|size87|read33|cov19.09_17912	H-probe	-1.39316	0.470317	-2.09183	-0.297934	-4.34543	-2.61153	-0.828401	-2.38678	-0.808716	-4.17609	0.0431084	-4.16909	-1.82703	-1.46645	-2.12029	-1.54217	-2.8845	-4.08473	-0.481413	-1.32582	-1.17742	-1.39979	1.40014		2.64228	1.96896	0.353077	0.924989	-1.22849	-3.27551	-0.213579	-0.344349		0.71933			-0.886728	-0.662963	-2.4241	-2.56912	-3.58985	-3.84813	-1.68327	0.166919	-1.39272	-0.918529	-1.81066	-1.58058
nw>contig11917|size80|read48|cov26.75_18916	H-probe	-0.657912	-1.83477	-1.26391	-0.760843	-1.80618	-2.07983	-2.25068	2.38632	1.38869	-1.19506	-3.34074	-0.87525	-1.28945	0.148711	-1.32498	-0.362508	-1.68376	-0.322043	-1.683	0.359221	-1.17099	-2.54411	-4.20792		3.56113	2.16082	1.97635	3.09115	1.90848	2.05236	0.342522	5.22299		1.21189			-0.168906	-1.49031	-2.43925	0.0522624	-1.94004	-2.6399	-1.76825	3.17664	0.37777	-0.859756	-2.41533	-0.945405
nw>contig11918|size226|read46|cov10.04_54917	H-probe	0	-0.94363	-0.521246	0	0	0.84832	0	0	-0.698952	0	0	0	0	-0.94363	-0.521246	0	0	0	0	0	0.284363	0	0		0	-0.218795	0.152271	0.768538	0	0	0	0		1.68605			0	-0.94363	-0.521246	0	0	0	0	0	0.0541799	0	0	0
nw>contig11919|size394|read210|cov20.20_96162	H-probe	1.44127	-0.284931	0.0919493	0	-0.883673	0	0	0	0	0	0	0	0	0.497755	-0.521246	0	-0.883673	0	0	0	0	0	0		2.86389	0.439904	0.609628	0.768538	0.322154	0	0	0.698714		2.44241			0	-0.284931	-0.521246	0	-0.883673	0.822693	0	0.395779	0	0	0	0
nw>contig11922|size85|read48|cov27.06_24918	H-probe	-0.120463	-1.95552	-1.09871	-1.049	-1.64334	-2.18106	-3.22459	2.31763	0.573297	-2.77481	-2.92993	-1.79902	-0.0859669	0.427181	-1.34043	-0.786559	-1.6723	0.67779	-2.80344	-1.15308	-1.08638	-4.47108	-5.07696		3.73298	2.38522	2.05235	3.09605	1.82481	2.74552	-0.207746	5.1303		0.573499			-0.300019	-1.28085	-2.26249	-0.134982	-1.88535	-2.29561	-2.54011	2.98583	0.44192	-2.47994	-3.15436	-1.63264
nw>contig11935|size237|read47|cov9.76_53922	H-probe	0	1.66287	-0.579908	0.325614	0	0	0	0	-0.361446	-0.983536	0	-1.02677	0	0.782686	0.0517139	-0.969983	0	0	0	0	-0.361446	-0.983536	0		0	2.47741	0.0936087	0.297305	1.85335	2.01622	2.46169	1.16743		-0.983536			1.04316	0	-0.579908	-0.969983	0	0.822693	0	0.395779	-0.361446	-0.983536	0	-1.02677
nw>contig1194|size128|read303|cov107.88_68924	H-probe	0.0451662	-1.94511	-1.52491	-0.717792	-1.73111	-2.59046	-2.24222	2.03958	1.12518	-1.87124	-3.45694	-1.07987	-0.498559	0.563491	-1.83445	-0.838926	-1.77783	0.014969	-2.47459	-0.395645	-0.632493	-3.06763	-4.11773		3.64009	2.43901	1.76678	3.2619	1.9669	2.39248	0.295559	5.03874		0.852181			-0.272806	-1.35911	-2.56215	-0.0442981	-2.07584	-2.3938	-2.41164	2.78171	0.540717	-1.91957	-3.13445	-1.21847
nw>contig11946|size147|read115|cov30.07_22163	H-probe	0	-0.925326	-1.27781	-0.400107	-1.42768	-1.69339	-1.1697	0.81248	0	-0.30955	0	-1.61275	0	-0.925326	-0.208372	-0.400107	-1.42768	-2.54171	0.408695	0	0	-0.30955	0		0	0.279706	0.713068	1.2371	0.665456	-0.525493	-1.1697	1.16743		-0.30955			1.64223	-0.174136	-0.215777	-0.400107	-1.42768	-1.71902	0.110342	0.724583	0	0.730832	0	-1.61275
nw>contig11950|size504|read138|cov12.87_193925	H-probe	0	-0.539388	0.0332866	-0.777163	0	0	-0.260777	0.709081	-0.562343	-0.698565	-1.64365	0	1.03444	0.747885	-0.579908	-0.777163	0	1.06914	-0.260777	-0.999629	-0.562343	-0.698565	-1.64365		3.05769	1.0253	1.94607	1.95149	2.91331	2.47711	1.44157	0.167802		0.987483			1.04316	0.211802	-0.579908	-0.00116552	0	0	-0.260777	-0.293601	-0.562343	-0.698565	-1.64365	0
nw>contig1196|size98|read60|cov30.94_1929	H-probe	-1.46824	0.681749	-1.80879	0.262734	-4.74629	-2.78505	-0.818896	-2.2997	-0.686846	-5.17063	0.0216017	-3.5471	-1.95974	-1.30081	-1.72065	-1.10093	-3.03346	-4.2279	-0.490178	-1.52719	-0.865512	-1.60712	2.70299		2.1434	2.00189	0.62955	1.40818	-1.59513	-3.35841	-0.358667	-0.496273		0.918576			-1.35179	-0.431318	-2.12663	-1.73206	-3.99703	-4.08279	-1.90809	-0.0324029	-1.12613	-1.11927	-0.594134	-1.18009
[truncated: 37,893 more rows]
[truncated: 36 more columns]
